# Supplementary material for: A simple model for calculating atomic charges in molecules
Source: Royal Society of Chemistry journal article supplement (doi:10.1039/c8cp03764g), 2018-01-01
Supplement: c8cp03764g1.pdf [file c8cp03764g1.pdf]

## Supporting Information:

### **A simple model for calculating atomic charges in molecules**

*Alexander A. Voityuk\**<sup>1,2</sup> *Anton J. Stasyuk*<sup>2</sup> and *Sergei F. Vyboishchikov\**<sup>2,3</sup>

<sup>1</sup> Institució Catalana de Recerca i Estudis Avançats (ICREA), Passeig de Lluís Companys, 23, 08010

Barcelona, Spain

<sup>2</sup> Institut de Química Computacional i Catàlisi and Departament de Química, Universitat de Girona,

Carrer Maria Aurèlia Capmany, 17003 Girona, Spain.

<sup>3</sup> Peoples' Friendship University of Russia (RUDN University), 6 Miklukho-Maklay Street, 117198

Moscow, Russia

## Atomic charges in a.u.

## Keywords:

File TZVPMol001.out  
 Molecule PMol001 fulvene  
 SP Mol001 B3LYP/Def2TZVP VAC.  
 0 16

|                      |                           |         |         |         |         |         |          |         |         |         |         |         |
|----------------------|---------------------------|---------|---------|---------|---------|---------|----------|---------|---------|---------|---------|---------|
| Dipole               | 0.0000                    | 0.0000  | -0.6984 | 0.6984  |         |         |          |         |         |         |         |         |
| Quadrupole           | -0.2265                   | 0.8549  | -0.6284 | 0.8224  | 0.0000  | 0.0000  |          |         |         |         |         |         |
|                      | Atomic coordinates (in A) |         |         | Mul.    | Lowdin  | Hirsch. | I-Hirsch | CM5     | ESP     | NPA     | AIM     | ACP     |
| 6                    | 0.0000                    | 0.7626  | -1.4095 | -0.1684 | -0.2492 | -0.0493 | -0.1546  | -0.1584 | -0.0336 | -0.3840 | 0.0341  | -0.1480 |
| 6                    | 0.0000                    | -0.7626 | -1.4095 | -0.1684 | -0.2492 | -0.0493 | -0.1546  | -0.1584 | -0.0237 | -0.3840 | 0.0342  | -0.1480 |
| 6                    | -0.5190                   | -1.1076 | -0.0154 | -0.1640 | -0.2106 | -0.0503 | -0.2317  | -0.1541 | -0.1079 | -0.4362 | 0.0257  | -0.1511 |
| 6                    | 0.0000                    | 0.0000  | 0.8704  | 0.0301  | -0.1941 | 0.0089  | 0.1989   | -0.0140 | 0.2467  | 0.0266  | -0.0388 | 0.0469  |
| 6                    | 0.5190                    | 1.1076  | -0.0154 | -0.1640 | -0.2106 | -0.0503 | -0.2317  | -0.1541 | -0.1242 | -0.4362 | 0.0252  | -0.1511 |
| 1                    | 0.5920                    | 1.1996  | -2.2124 | 0.0944  | 0.1271  | 0.0289  | 0.0842   | 0.0833  | 0.0145  | 0.2044  | -0.0078 | 0.0793  |
| 1                    | -1.0222                   | 1.1306  | -1.5298 | 0.0820  | 0.1334  | 0.0272  | 0.0841   | 0.0829  | 0.0339  | 0.1902  | -0.0151 | 0.0741  |
| 1                    | 1.0222                    | -1.1306 | -1.5298 | 0.0820  | 0.1334  | 0.0272  | 0.0841   | 0.0829  | 0.0312  | 0.1902  | -0.0151 | 0.0741  |
| 1                    | -0.5920                   | -1.1996 | -2.2124 | 0.0944  | 0.1271  | 0.0289  | 0.0842   | 0.0833  | 0.0105  | 0.2044  | -0.0078 | 0.0793  |
| 1                    | -1.6133                   | -1.0870 | -0.0141 | 0.0918  | 0.1437  | 0.0324  | 0.0976   | 0.0882  | 0.0540  | 0.2084  | 0.0015  | 0.0768  |
| 1                    | -0.2318                   | -2.0988 | 0.3346  | 0.1031  | 0.1364  | 0.0337  | 0.0993   | 0.0888  | 0.0436  | 0.2155  | 0.0053  | 0.0808  |
| 1                    | 0.2318                    | 2.0988  | 0.3346  | 0.1031  | 0.1364  | 0.0337  | 0.0993   | 0.0888  | 0.0493  | 0.2155  | 0.0053  | 0.0808  |
| 1                    | 1.6133                    | 1.0870  | -0.0141 | 0.0918  | 0.1437  | 0.0324  | 0.0976   | 0.0882  | 0.0583  | 0.2084  | 0.0015  | 0.0768  |
| 6                    | 0.0000                    | 0.0000  | 2.1976  | -0.3119 | -0.2063 | -0.1124 | -0.3808  | -0.2121 | -0.6693 | -0.4030 | -0.0846 | -0.2230 |
| 1                    | 0.3730                    | 0.8416  | 2.7677  | 0.1020  | 0.1194  | 0.0291  | 0.1120   | 0.0824  | 0.2089  | 0.1899  | 0.0177  | 0.0762  |
| 1                    | -0.3730                   | -0.8416 | 2.7677  | 0.1020  | 0.1194  | 0.0291  | 0.1120   | 0.0824  | 0.2080  | 0.1899  | 0.0177  | 0.0762  |
| Dipole mement (in D) | 0.70 (DEN)                |         | 1.04    | 0.65    | 0.61    | 0.80    | 0.65     | 0.65    | 0.69    | 0.30    | 0.65    | 0.63    |

-----  
 File TZVPMol002.out  
 Molecule PMol002 propane  
 SP Mol002 B3LYP/Def2TZVP VAC.  
 0 11

|            |                           |         |         |         |         |         |          |         |         |         |         |         |
|------------|---------------------------|---------|---------|---------|---------|---------|----------|---------|---------|---------|---------|---------|
| Dipole     | 0.0000                    | 0.0000  | 0.0904  | 0.0904  |         |         |          |         |         |         |         |         |
| Quadrupole | 0.4407                    | -0.4067 | -0.0340 | 0.0000  | 0.0000  | 0.0000  |          |         |         |         |         |         |
|            | Atomic coordinates (in A) |         |         | Mul.    | Lowdin  | Hirsch. | I-Hirsch | CM5     | ESP     | NPA     | AIM     | ACP     |
| 6          | 0.0000                    | 1.2624  | -0.2572 | -0.3206 | -0.3136 | -0.0850 | -0.3238  | -0.2368 | -0.2849 | -0.5865 | 0.0130  | -0.2480 |
| 1          | 0.0000                    | 2.1638  | 0.3545  | 0.1072  | 0.1153  | 0.0281  | 0.0959   | 0.0793  | 0.0525  | 0.2016  | -0.0072 | 0.0814  |
| 1          | -0.8769                   | 1.3070  | -0.9046 | 0.0986  | 0.1155  | 0.0266  | 0.0969   | 0.0783  | 0.0604  | 0.1937  | -0.0102 | 0.0785  |
| 1          | 0.8769                    | 1.3070  | -0.9046 | 0.0986  | 0.1155  | 0.0266  | 0.0969   | 0.0783  | 0.0611  | 0.1937  | -0.0102 | 0.0785  |
| 6          | 0.0000                    | 0.0000  | 0.5840  | -0.1336 | -0.3226 | -0.0439 | -0.0907  | -0.1587 | 0.3457  | -0.3824 | 0.0636  | -0.1318 |
| 1          | -0.8696                   | 0.0000  | 1.2458  | 0.0830  | 0.1286  | 0.0258  | 0.0795   | 0.0803  | -0.0618 | 0.1887  | -0.0173 | 0.0756  |
| 1          | 0.8696                    | 0.0000  | 1.2458  | 0.0830  | 0.1286  | 0.0258  | 0.0795   | 0.0803  | -0.0621 | 0.1887  | -0.0173 | 0.0756  |
| 6          | 0.0000                    | -1.2624 | -0.2572 | -0.3206 | -0.3136 | -0.0850 | -0.3238  | -0.2368 | -0.2849 | -0.5865 | 0.0132  | -0.2480 |
| 1          | 0.0000                    | -2.1638 | 0.3545  | 0.1072  | 0.1153  | 0.0281  | 0.0959   | 0.0793  | 0.0525  | 0.2016  | -0.0072 | 0.0814  |
| 1          | -0.8769                   | -1.3070 | -0.9046 | 0.0986  | 0.1155  | 0.0266  | 0.0969   | 0.0783  | 0.0604  | 0.1937  | -0.0102 | 0.0785  |
| 1          | 0.8769                    | -1.3070 | -0.9046 | 0.0986  | 0.1155  | 0.0266  | 0.0969   | 0.0783  | 0.0611  | 0.1937  | -0.0102 | 0.0785  |

Dipole moment (in D) 0.09 (DEN) 0.06 0.21 0.03 0.14 0.01 0.05 0.05 0.09 0.06

-----  
File TZVPMol003.out

Molecule PMol003 isobutane  
SP Mol003 B3LYP/Def2TZVP VAC.  
0 14

Dipole 0.1111 0.0723 0.0000 0.1326  
Quadrupole 0.2387 -0.0236 -0.2150 0.2945 0.0000 0.0000

|   | Atomic coordinates (in A) |         |         | Mul.    | Lowdin  | Hirsch. | I-Hirsch | CM5     | ESP     | NPA     | AIM     | ACP     |
|---|---------------------------|---------|---------|---------|---------|---------|----------|---------|---------|---------|---------|---------|
| 6 | -0.8673                   | 1.1618  | 0.0000  | -0.3269 | -0.2869 | -0.0860 | -0.3587  | -0.2359 | -0.4843 | -0.5845 | 0.0077  | -0.2519 |
| 6 | 0.3147                    | 0.2044  | 0.0000  | 0.0064  | -0.3418 | -0.0090 | 0.1035   | -0.0856 | 0.5839  | -0.2116 | 0.0896  | -0.0217 |
| 1 | 1.2336                    | 0.8012  | 0.0000  | 0.0581  | 0.1443  | 0.0255  | 0.0689   | 0.0835  | -0.0728 | 0.1820  | -0.0227 | 0.0718  |
| 1 | -0.8671                   | 1.8051  | 0.8802  | 0.1046  | 0.1174  | 0.0272  | 0.0998   | 0.0791  | 0.1015  | 0.2005  | -0.0093 | 0.0793  |
| 1 | -0.8671                   | 1.8051  | -0.8802 | 0.1046  | 0.1174  | 0.0272  | 0.0998   | 0.0791  | 0.1015  | 0.2005  | -0.0093 | 0.0793  |
| 1 | -1.8111                   | 0.6117  | 0.0000  | 0.0962  | 0.1180  | 0.0260  | 0.1016   | 0.0784  | 0.1061  | 0.1933  | -0.0113 | 0.0766  |
| 6 | 0.3147                    | -0.6581 | -1.2529 | -0.3268 | -0.2869 | -0.0859 | -0.3586  | -0.2358 | -0.4560 | -0.5844 | 0.0078  | -0.2519 |
| 6 | 0.3147                    | -0.6581 | 1.2529  | -0.3268 | -0.2869 | -0.0859 | -0.3586  | -0.2358 | -0.4560 | -0.5844 | 0.0077  | -0.2519 |
| 1 | 1.1707                    | -1.3328 | -1.2798 | 0.1046  | 0.1174  | 0.0272  | 0.0998   | 0.0791  | 0.0925  | 0.2005  | -0.0093 | 0.0793  |
| 1 | -0.5861                   | -1.2744 | -1.2987 | 0.0962  | 0.1180  | 0.0260  | 0.1016   | 0.0784  | 0.1021  | 0.1933  | -0.0113 | 0.0766  |
| 1 | 0.3407                    | -0.0541 | -2.1601 | 0.1046  | 0.1174  | 0.0272  | 0.0998   | 0.0791  | 0.0934  | 0.2005  | -0.0093 | 0.0793  |
| 1 | -0.5861                   | -1.2744 | 1.2987  | 0.0962  | 0.1180  | 0.0260  | 0.1016   | 0.0784  | 0.1021  | 0.1933  | -0.0113 | 0.0766  |
| 1 | 1.1707                    | -1.3328 | 1.2798  | 0.1046  | 0.1174  | 0.0272  | 0.0998   | 0.0791  | 0.0925  | 0.2005  | -0.0093 | 0.0793  |
| 1 | 0.3407                    | -0.0541 | 2.1601  | 0.1046  | 0.1174  | 0.0272  | 0.0998   | 0.0791  | 0.0934  | 0.2005  | -0.0093 | 0.0793  |

Dipole moment (in D) 0.13 (DEN) 0.00 0.36 0.04 0.16 0.00 0.11 0.12 0.12 0.09

-----  
File TZVPMol004.out

Molecule PMol004 cyclopropene  
SP Mol004 B3LYP/Def2TZVP VAC.  
0 7

Dipole 0.0000 0.0000 -0.4810 0.4810  
Quadrupole -1.1348 1.5254 -0.3906 0.0000 0.0000

|   | Atomic coordinates (in A) |         |         | Mul.    | Lowdin  | Hirsch. | I-Hirsch | CM5     | ESP     | NPA     | AIM     | ACP     |
|---|---------------------------|---------|---------|---------|---------|---------|----------|---------|---------|---------|---------|---------|
| 6 | 0.0000                    | 0.6434  | -0.4958 | -0.1150 | -0.1092 | -0.0440 | -0.1104  | -0.1016 | -0.1649 | -0.1764 | -0.1315 | -0.0862 |
| 6 | 0.0000                    | -0.6434 | -0.4958 | -0.1150 | -0.1092 | -0.0440 | -0.1104  | -0.1016 | -0.1649 | -0.1764 | -0.1313 | -0.0862 |
| 6 | 0.0000                    | 0.0000  | 0.8513  | -0.2442 | -0.2463 | -0.0794 | -0.2043  | -0.1784 | -0.0868 | -0.4193 | 0.0621  | -0.1802 |
| 1 | -0.9092                   | 0.0000  | 1.4514  | 0.0897  | 0.1088  | 0.0176  | 0.0706   | 0.0709  | 0.0506  | 0.1693  | -0.0029 | 0.0628  |
| 1 | 0.9092                    | 0.0000  | 1.4514  | 0.0897  | 0.1088  | 0.0176  | 0.0706   | 0.0709  | 0.0472  | 0.1693  | -0.0029 | 0.0628  |
| 1 | 0.0000                    | 1.5765  | -1.0304 | 0.1473  | 0.1236  | 0.0662  | 0.1420   | 0.1198  | 0.1594  | 0.2167  | 0.1030  | 0.1135  |
| 1 | 0.0000                    | -1.5765 | -1.0304 | 0.1473  | 0.1236  | 0.0662  | 0.1420   | 0.1198  | 0.1594  | 0.2167  | 0.1030  | 0.1135  |

Dipole moment (in D) 0.48 (DEN) 0.66 0.19 0.52 0.73 0.44 0.47 0.66 0.18 0.57

-----  
File TZVPMol005.out

Molecule PMol005 propene  
SP Mol005 B3LYP/Def2TZVP VAC.  
0 9

Dipole 0.4095 -0.0770 0.0000 0.4167  
Quadrupole 0.7457 1.0481 -1.7939 -0.1460 0.0000 0.0001

|   | Atomic coordinates (in A) |         |         | Mul.    | Lowdin  | Hirsch. | I-Hirsch | CM5     | ESP     | NPA     | AIM     | ACP     |
|---|---------------------------|---------|---------|---------|---------|---------|----------|---------|---------|---------|---------|---------|
| 6 | -1.2745                   | 0.2181  | -0.0000 | -0.2655 | -0.2235 | -0.0956 | -0.2999  | -0.1984 | -0.5656 | -0.3968 | -0.0766 | -0.2001 |
| 1 | -2.2319                   | -0.2851 | -0.0000 | 0.1089  | 0.1184  | 0.0336  | 0.1068   | 0.0864  | 0.1900  | 0.1937  | 0.0262  | 0.0821  |
| 1 | -1.2977                   | 1.3021  | 0.0000  | 0.1018  | 0.1174  | 0.0320  | 0.1082   | 0.0851  | 0.2115  | 0.1825  | 0.0200  | 0.0794  |
| 6 | -0.1302                   | -0.4516 | 0.0000  | -0.0755 | -0.2292 | -0.0293 | 0.0295   | -0.0957 | 0.0799  | -0.1658 | -0.0315 | -0.0562 |
| 1 | -0.1624                   | -1.5383 | 0.0000  | 0.0989  | 0.1360  | 0.0352  | 0.0835   | 0.0906  | 0.0809  | 0.1876  | 0.0165  | 0.0806  |
| 6 | 1.2237                    | 0.1618  | -0.0000 | -0.2988 | -0.2920 | -0.0823 | -0.3637  | -0.2294 | -0.2363 | -0.6300 | 0.0177  | -0.2442 |
| 1 | 1.1747                    | 1.2496  | -0.0000 | 0.1041  | 0.1228  | 0.0350  | 0.1136   | 0.0874  | 0.0895  | 0.2051  | 0.0073  | 0.0859  |
| 1 | 1.8018                    | -0.1491 | 0.8722  | 0.1131  | 0.1250  | 0.0356  | 0.1110   | 0.0870  | 0.0751  | 0.2118  | 0.0099  | 0.0862  |
| 1 | 1.8018                    | -0.1492 | -0.8722 | 0.1131  | 0.1250  | 0.0356  | 0.1110   | 0.0870  | 0.0751  | 0.2118  | 0.0100  | 0.0863  |

Dipole mement (in D) 0.42 (DEN) 0.59 0.57 0.35 0.42 0.40 0.41 0.32 0.39 0.38

-----  
File TZVPMol006.out  
Molecule PMol006 propyne  
SP Mol006 B3LYP/Def2TZVP VAC.  
0 7

Dipole 0.0000 0.0000 -0.8251 0.8251  
Quadrupole -1.8588 -1.8588 3.7176 0.0000 0.0000 0.0000

|   | Atomic coordinates (in A) |         |         | Mul.    | Lowdin  | Hirsch. | I-Hirsch | CM5     | ESP     | NPA     | AIM     | ACP     |
|---|---------------------------|---------|---------|---------|---------|---------|----------|---------|---------|---------|---------|---------|
| 6 | 0.0000                    | 0.0000  | 1.4149  | -0.1345 | -0.1181 | -0.1288 | -0.3502  | -0.1809 | -0.5920 | -0.2535 | -0.1452 | -0.1854 |
| 6 | 0.0000                    | 0.0000  | 0.2144  | -0.0727 | -0.1462 | -0.0463 | 0.1105   | -0.0607 | 0.2113  | -0.0014 | -0.2187 | -0.0230 |
| 6 | 0.0000                    | 0.0000  | -1.2293 | -0.3961 | -0.2771 | -0.0594 | -0.3734  | -0.2028 | -0.3536 | -0.6704 | 0.0843  | -0.2197 |
| 1 | 0.0000                    | 1.0153  | -1.6253 | 0.1406  | 0.1395  | 0.0512  | 0.1363   | 0.1032  | 0.1319  | 0.2319  | 0.0415  | 0.1005  |
| 1 | -0.8793                   | -0.5077 | -1.6253 | 0.1406  | 0.1395  | 0.0512  | 0.1363   | 0.1032  | 0.1326  | 0.2319  | 0.0415  | 0.1005  |
| 1 | 0.8793                    | -0.5077 | -1.6253 | 0.1406  | 0.1395  | 0.0512  | 0.1363   | 0.1032  | 0.1329  | 0.2319  | 0.0415  | 0.1005  |
| 1 | 0.0000                    | 0.0000  | 2.4762  | 0.1815  | 0.1230  | 0.0807  | 0.2042   | 0.1347  | 0.3369  | 0.2297  | 0.1552  | 0.1265  |

Dipole mement (in D) 0.83 (DEN) 0.21 1.12 0.81 0.82 0.91 0.81 0.46 0.84 0.84

-----  
File TZVPMol007.out  
Molecule PMol007 1,3-pentadiyne  
SP Mol007 B3LYP/Def2TZVP VAC.  
0 9

Dipole 0.0001 0.0000 -1.3443 1.3443  
Quadrupole -4.2566 -4.2567 8.5134 0.0000 0.0000 0.0000

|   | Atomic coordinates (in A) |        |         | Mul.    | Lowdin  | Hirsch. | I-Hirsch | CM5     | ESP     | NPA     | AIM     | ACP     |
|---|---------------------------|--------|---------|---------|---------|---------|----------|---------|---------|---------|---------|---------|
| 6 | 0.0000                    | 0.0000 | -1.0583 | -0.0681 | -0.0513 | -0.0143 | 0.0928   | -0.0262 | 0.1761  | 0.0944  | -0.1412 | -0.0026 |
| 6 | 0.0000                    | 0.0000 | 0.1512  | 0.0294  | -0.0736 | -0.0576 | -0.1204  | -0.0584 | -0.3172 | -0.1106 | -0.0539 | -0.0560 |
| 6 | 0.0000                    | 0.0000 | 1.5071  | -0.0173 | -0.1041 | -0.0401 | 0.0631   | -0.0427 | 0.2749  | -0.0782 | -0.0964 | -0.0271 |
| 6 | 0.0000                    | 0.0000 | 2.7151  | -0.1820 | -0.0552 | -0.0838 | -0.2770  | -0.1351 | -0.5030 | -0.1744 | -0.1132 | -0.1426 |

|   |         |         |         |         |         |         |         |         |         |         |        |         |
|---|---------|---------|---------|---------|---------|---------|---------|---------|---------|---------|--------|---------|
| 1 | 0.0000  | 0.0000  | 3.7762  | 0.1839  | 0.1270  | 0.0883  | 0.2036  | 0.1423  | 0.3186  | 0.2321  | 0.1720 | 0.1344  |
| 6 | 0.0000  | 0.0000  | -2.4973 | -0.3909 | -0.2725 | -0.0565 | -0.3871 | -0.1996 | -0.3704 | -0.6732 | 0.0877 | -0.2174 |
| 1 | -1.0159 | 0.0000  | -2.8944 | 0.1483  | 0.1432  | 0.0547  | 0.1416  | 0.1066  | 0.1401  | 0.2367  | 0.0483 | 0.1038  |
| 1 | 0.5079  | 0.8798  | -2.8944 | 0.1483  | 0.1432  | 0.0547  | 0.1416  | 0.1066  | 0.1404  | 0.2367  | 0.0483 | 0.1038  |
| 1 | 0.5079  | -0.8798 | -2.8944 | 0.1483  | 0.1432  | 0.0547  | 0.1416  | 0.1066  | 0.1404  | 0.2367  | 0.0483 | 0.1038  |

Dipole mement (in D) 1.34 (DEN) 0.29 1.67 1.35 1.29 1.45 1.33 0.99 1.44 1.37

-----  
 File TZVPMol008.out  
 Molecule PMol008 ammonia  
 SP Mol008 B3LYP/Def2TZVP VAC.  
 0 4

|            |                           |         |         |         |         |         |          |         |         |         |         |         |
|------------|---------------------------|---------|---------|---------|---------|---------|----------|---------|---------|---------|---------|---------|
| Dipole     | 0.0000                    | 0.0001  | 1.7403  | 1.7403  |         |         |          |         |         |         |         |         |
| Quadrupole | 0.9757                    | 0.9755  | -1.9513 | 0.0000  | -0.0001 | 0.0000  |          |         |         |         |         |         |
|            | Atomic coordinates (in A) |         |         | Mul.    | Lowdin  | Hirsch. | I-Hirsch | CM5     | ESP     | NPA     | AIM     | ACP     |
| 7          | 0.0000                    | -0.0000 | -0.1171 | -0.6562 | -0.3913 | -0.2753 | -0.9579  | -0.8235 | -0.9583 | -1.0368 | -1.0119 | -0.6903 |
| 1          | 0.8504                    | -0.3850 | 0.2733  | 0.2187  | 0.1304  | 0.0918  | 0.3193   | 0.2745  | 0.3199  | 0.3456  | 0.3373  | 0.2301  |
| 1          | -0.0918                   | 0.9290  | 0.2733  | 0.2187  | 0.1304  | 0.0918  | 0.3193   | 0.2745  | 0.3179  | 0.3456  | 0.3373  | 0.2301  |
| 1          | -0.7587                   | -0.5439 | 0.2733  | 0.2187  | 0.1305  | 0.0918  | 0.3193   | 0.2745  | 0.3205  | 0.3456  | 0.3373  | 0.2301  |

Dipole mement (in D) 1.74 (DEN) 1.23 0.73 0.52 1.80 1.54 1.80 1.94 1.90 1.29

-----  
 File TZVPMol009.out  
 Molecule PMol009 water  
 SP Mol009 B3LYP/Def2TZVP VAC.  
 0 3

|            |                           |         |         |         |         |         |          |         |         |         |         |         |
|------------|---------------------------|---------|---------|---------|---------|---------|----------|---------|---------|---------|---------|---------|
| Dipole     | 0.0000                    | 0.0000  | -2.0756 | 2.0756  |         |         |          |         |         |         |         |         |
| Quadrupole | -1.4819                   | 1.6966  | -0.2147 | 0.0000  | 0.0000  | 0.0000  |          |         |         |         |         |         |
|            | Atomic coordinates (in A) |         |         | Mul.    | Lowdin  | Hirsch. | I-Hirsch | CM5     | ESP     | NPA     | AIM     | ACP     |
| 8          | 0.0000                    | 0.0000  | 0.1176  | -0.6273 | -0.3056 | -0.3062 | -0.8831  | -0.6419 | -0.7554 | -0.9084 | -1.1214 | -0.5164 |
| 1          | 0.0000                    | 0.7567  | -0.4702 | 0.3136  | 0.1528  | 0.1531  | 0.4415   | 0.3210  | 0.3777  | 0.4542  | 0.5607  | 0.2582  |
| 1          | 0.0000                    | -0.7567 | -0.4702 | 0.3136  | 0.1528  | 0.1531  | 0.4415   | 0.3210  | 0.3777  | 0.4542  | 0.5607  | 0.2582  |

Dipole mement (in D) 2.08 (DEN) 1.77 0.86 0.86 2.49 1.81 2.13 2.56 3.17 1.46

-----  
 File TZVPMol010.out  
 Molecule PMol010 Z-diimine  
 SP Mol010 B3LYP/Def2TZVP VAC.  
 0 4

|            |                           |         |         |         |         |         |          |         |         |         |         |         |
|------------|---------------------------|---------|---------|---------|---------|---------|----------|---------|---------|---------|---------|---------|
| Dipole     | 0.0000                    | 0.0000  | 2.9227  | 2.9227  |         |         |          |         |         |         |         |         |
| Quadrupole | 0.0281                    | -0.4131 | 0.3851  | 0.0000  | 0.0000  | 0.0000  |          |         |         |         |         |         |
|            | Atomic coordinates (in A) |         |         | Mul.    | Lowdin  | Hirsch. | I-Hirsch | CM5     | ESP     | NPA     | AIM     | ACP     |
| 7          | 0.0000                    | 0.6177  | -0.1197 | -0.1852 | -0.1228 | -0.0959 | -0.2149  | -0.2860 | -0.3065 | -0.2730 | -0.3012 | -0.2314 |
| 7          | 0.0000                    | -0.6177 | -0.1197 | -0.1852 | -0.1228 | -0.0959 | -0.2149  | -0.2860 | -0.3065 | -0.2730 | -0.3011 | -0.2314 |
| 1          | 0.0000                    | 1.0264  | 0.8380  | 0.1852  | 0.1228  | 0.0959  | 0.2149   | 0.2860  | 0.3065  | 0.2730  | 0.3013  | 0.2314  |

|                      |            |         |        |        |        |        |        |        |        |        |        |        |
|----------------------|------------|---------|--------|--------|--------|--------|--------|--------|--------|--------|--------|--------|
| 1                    | 0.0000     | -1.0264 | 0.8380 | 0.1852 | 0.1228 | 0.0959 | 0.2149 | 0.2860 | 0.3065 | 0.2730 | 0.3013 | 0.2314 |
| Dipole moment (in D) | 2.92 (DEN) |         | 1.70   | 1.13   | 0.88   | 1.98   | 2.63   | 2.82   | 2.51   | 2.77   | 2.13   |        |

-----  
File TZVPMol011.out

Molecule PMol011 hydroxylamine  
SP Mol011 B3LYP/Def2TZVP VAC.

0 5

|            |        |         |        |        |        |        |  |  |  |  |  |  |
|------------|--------|---------|--------|--------|--------|--------|--|--|--|--|--|--|
| Dipole     | 0.1299 | 0.5763  | 0.0000 | 0.5908 |        |        |  |  |  |  |  |  |
| Quadrupole | 0.6911 | -0.9173 | 0.2262 | 3.9011 | 0.0000 | 0.0000 |  |  |  |  |  |  |

|   | Atomic coordinates (in A) |         |         | Mul.    | Lowdin  | Hirsch. | I-Hirsch | CM5     | ESP     | NPA     | AIM     | ACP     |
|---|---------------------------|---------|---------|---------|---------|---------|----------|---------|---------|---------|---------|---------|
| 8 | -0.0114                   | -0.7347 | 0.0000  | -0.4152 | -0.1693 | -0.2138 | -0.4739  | -0.3822 | -0.4487 | -0.5761 | -0.7651 | -0.2913 |
| 7 | -0.0114                   | 0.7042  | 0.0000  | -0.3497 | -0.2543 | -0.1423 | -0.5076  | -0.5521 | -0.7330 | -0.5251 | -0.4956 | -0.4372 |
| 1 | 0.5598                    | 0.9437  | 0.8059  | 0.2225  | 0.1331  | 0.1015  | 0.2848   | 0.2968  | 0.3762  | 0.3238  | 0.3462  | 0.2304  |
| 1 | 0.5598                    | 0.9437  | -0.8059 | 0.2225  | 0.1331  | 0.1015  | 0.2848   | 0.2968  | 0.3762  | 0.3238  | 0.3462  | 0.2304  |
| 1 | -0.9492                   | -0.9395 | 0.0000  | 0.3200  | 0.1575  | 0.1529  | 0.4120   | 0.3408  | 0.4292  | 0.4536  | 0.5681  | 0.2677  |

|                      |            |  |      |      |      |      |      |      |      |      |      |  |
|----------------------|------------|--|------|------|------|------|------|------|------|------|------|--|
| Dipole moment (in D) | 0.59 (DEN) |  | 0.88 | 0.23 | 0.52 | 0.74 | 0.64 | 0.59 | 1.18 | 1.73 | 0.43 |  |
|----------------------|------------|--|------|------|------|------|------|------|------|------|------|--|

-----  
File TZVPMol012.out

Molecule PMol012 nitrogen\_monoxide  
SP Mol012 B3LYP/Def2TZVP VAC.

0 2

|            |         |        |         |        |        |        |  |  |  |  |  |  |
|------------|---------|--------|---------|--------|--------|--------|--|--|--|--|--|--|
| Dipole     | 0.0000  | 0.0000 | 0.1199  | 0.1199 |        |        |  |  |  |  |  |  |
| Quadrupole | -0.1596 | 0.9684 | -0.8088 | 0.0000 | 0.0000 | 0.0000 |  |  |  |  |  |  |

|   | Atomic coordinates (in A) |        |         | Mul.    | Lowdin  | Hirsch. | I-Hirsch | CM5     | ESP     | NPA     | AIM     | ACP     |
|---|---------------------------|--------|---------|---------|---------|---------|----------|---------|---------|---------|---------|---------|
| 7 | 0.0000                    | 0.0000 | -0.6126 | 0.0562  | -0.1006 | 0.0307  | 0.0583   | -0.0263 | -0.0173 | 0.1845  | 0.4149  | 0.0551  |
| 8 | 0.0000                    | 0.0000 | 0.5361  | -0.0562 | 0.1006  | -0.0307 | -0.0583  | 0.0263  | 0.0173  | -0.1845 | -0.4149 | -0.0551 |

|                      |            |  |      |      |      |      |      |      |      |      |      |  |
|----------------------|------------|--|------|------|------|------|------|------|------|------|------|--|
| Dipole moment (in D) | 0.12 (DEN) |  | 0.31 | 0.55 | 0.17 | 0.32 | 0.14 | 0.10 | 1.02 | 2.29 | 0.30 |  |
|----------------------|------------|--|------|------|------|------|------|------|------|------|------|--|

-----  
File TZVPMol013.out

Molecule PMol013 nitrogen\_dioxide  
SP Mol013 B3LYP/Def2TZVP VAC.

0 3

|            |        |         |        |        |        |        |  |  |  |  |  |  |
|------------|--------|---------|--------|--------|--------|--------|--|--|--|--|--|--|
| Dipole     | 0.0000 | 0.0000  | 0.3275 | 0.3275 |        |        |  |  |  |  |  |  |
| Quadrupole | 1.3100 | -1.8584 | 0.5484 | 0.0000 | 0.0000 | 0.0000 |  |  |  |  |  |  |

|   | Atomic coordinates (in A) |         |         | Mul.    | Lowdin  | Hirsch. | I-Hirsch | CM5     | ESP     | NPA     | AIM     | ACP     |
|---|---------------------------|---------|---------|---------|---------|---------|----------|---------|---------|---------|---------|---------|
| 7 | 0.0000                    | 0.0000  | 0.3219  | 0.3568  | -0.0981 | 0.2136  | 0.5112   | 0.1116  | 0.2406  | 0.4858  | 0.7230  | 0.2593  |
| 8 | 0.0000                    | 1.0999  | -0.1408 | -0.1784 | 0.0491  | -0.1068 | -0.2556  | -0.0558 | -0.1203 | -0.2429 | -0.3615 | -0.1297 |
| 8 | 0.0000                    | -1.0999 | -0.1408 | -0.1784 | 0.0491  | -0.1068 | -0.2556  | -0.0558 | -0.1203 | -0.2429 | -0.3615 | -0.1297 |

|                      |            |  |      |      |      |      |      |      |      |      |      |  |
|----------------------|------------|--|------|------|------|------|------|------|------|------|------|--|
| Dipole moment (in D) | 0.33 (DEN) |  | 0.79 | 0.22 | 0.47 | 1.14 | 0.25 | 0.53 | 1.08 | 1.61 | 0.58 |  |
|----------------------|------------|--|------|------|------|------|------|------|------|------|------|--|

-----

File TZVPMol014.out

Molecule PMol014 nitroxyl

SP Mol014 B3LYP/Def2TZVP VAC.

0 3

Dipole -1.4132 0.8992 0.0000 1.6750

Quadrupole 0.0621 -0.7261 0.6640 -1.4088 0.0000 0.0000

|   | Atomic coordinates (in A) |         |        | Mul.    | Lowdin  | Hirsch. | I-Hirsch | CM5     | ESP     | NPA     | AIM     | ACP     |
|---|---------------------------|---------|--------|---------|---------|---------|----------|---------|---------|---------|---------|---------|
| 7 | 0.0632                    | 0.5765  | 0.0000 | -0.0096 | -0.1286 | 0.0175  | -0.0044  | -0.1914 | -0.1943 | -0.0045 | 0.1335  | -0.0844 |
| 8 | 0.0632                    | -0.6200 | 0.0000 | -0.1737 | 0.0090  | -0.1083 | -0.1545  | -0.0763 | -0.0793 | -0.2274 | -0.4092 | -0.1201 |
| 1 | -0.9483                   | 0.9249  | 0.0000 | 0.1834  | 0.1196  | 0.0908  | 0.1588   | 0.2677  | 0.2736  | 0.2319  | 0.2757  | 0.2045  |

Dipole moment (in D) 1.68 (DEN) 1.58 0.60 0.89 1.39 1.57 1.61 2.04 3.12 1.43

-----  
File TZVPMol015.out

Molecule PMol015 methylamine

SP Mol015 B3LYP/Def2TZVP VAC.

0 7

Dipole -1.3308 0.3270 0.0000 1.3704

Quadrupole -1.0200 -0.3374 1.3575 2.2048 0.0000 0.0000

|   | Atomic coordinates (in A) |         |         | Mul.    | Lowdin  | Hirsch. | I-Hirsch | CM5     | ESP     | NPA     | AIM     | ACP     |
|---|---------------------------|---------|---------|---------|---------|---------|----------|---------|---------|---------|---------|---------|
| 7 | 0.0501                    | -0.7551 | 0.0000  | -0.4957 | -0.2082 | -0.2157 | -0.7472  | -0.6744 | -0.9315 | -0.8113 | -0.9904 | -0.5889 |
| 1 | -0.4452                   | -1.1075 | 0.8075  | 0.2027  | 0.1418  | 0.0929  | 0.2960   | 0.2807  | 0.3441  | 0.3413  | 0.3305  | 0.2268  |
| 1 | -0.4452                   | -1.1075 | -0.8075 | 0.2027  | 0.1418  | 0.0929  | 0.2960   | 0.2807  | 0.3441  | 0.3413  | 0.3305  | 0.2268  |
| 6 | 0.0501                    | 0.6999  | 0.0000  | -0.2219 | -0.3810 | -0.0465 | -0.0878  | -0.1421 | 0.3479  | -0.3959 | 0.3437  | -0.1209 |
| 1 | -0.9383                   | 1.1757  | 0.0000  | 0.0907  | 0.0889  | 0.0144  | 0.0570   | 0.0718  | -0.0824 | 0.1547  | -0.0241 | 0.0724  |
| 1 | 0.5886                    | 1.0628  | 0.8743  | 0.1107  | 0.1084  | 0.0310  | 0.0930   | 0.0917  | -0.0110 | 0.1849  | 0.0050  | 0.0920  |
| 1 | 0.5886                    | 1.0628  | -0.8743 | 0.1107  | 0.1084  | 0.0310  | 0.0930   | 0.0917  | -0.0110 | 0.1849  | 0.0050  | 0.0920  |

Dipole moment (in D) 1.37 (DEN) 0.98 0.68 0.35 1.31 1.24 1.34 1.59 1.83 1.16

-----  
File TZVPMol016.out

Molecule PMol016 dimethylamine

SP Mol016 B3LYP/Def2TZVP VAC.

0 10

Dipole -0.9091 -0.3093 0.0000 0.9603

Quadrupole -0.1495 -0.7114 0.8610 -2.1496 0.0000 0.0000

|   | Atomic coordinates (in A) |         |         | Mul.    | Lowdin  | Hirsch. | I-Hirsch | CM5     | ESP     | NPA     | AIM     | ACP     |
|---|---------------------------|---------|---------|---------|---------|---------|----------|---------|---------|---------|---------|---------|
| 7 | 0.0264                    | 0.5827  | 0.0000  | -0.3184 | -0.0724 | -0.1552 | -0.4785  | -0.5264 | -0.6349 | -0.5995 | -0.9820 | -0.4784 |
| 1 | -0.7753                   | 1.1974  | 0.0000  | 0.1813  | 0.1582  | 0.0958  | 0.2706   | 0.2887  | 0.3498  | 0.3422  | 0.3290  | 0.2247  |
| 6 | 0.0264                    | -0.2206 | 1.2042  | -0.2373 | -0.3552 | -0.0459 | -0.1334  | -0.1373 | -0.0009 | -0.4000 | 0.3431  | -0.1231 |
| 6 | 0.0264                    | -0.2206 | -1.2042 | -0.2373 | -0.3552 | -0.0459 | -0.1334  | -0.1373 | -0.0009 | -0.4000 | 0.3430  | -0.1231 |
| 1 | -0.7961                   | -0.9505 | 1.2619  | 0.0839  | 0.0914  | 0.0129  | 0.0558   | 0.0713  | 0.0223  | 0.1516  | -0.0260 | 0.0680  |
| 1 | -0.0261                   | 0.4193  | 2.0834  | 0.1137  | 0.1100  | 0.0325  | 0.0917   | 0.0933  | 0.0460  | 0.1936  | 0.0064  | 0.0931  |
| 1 | 0.9594                    | -0.7833 | 1.2645  | 0.1083  | 0.1109  | 0.0301  | 0.0899   | 0.0916  | 0.0752  | 0.1834  | 0.0031  | 0.0888  |
| 1 | -0.7961                   | -0.9505 | -1.2619 | 0.0839  | 0.0914  | 0.0129  | 0.0558   | 0.0713  | 0.0223  | 0.1516  | -0.0260 | 0.0680  |
| 1 | -0.0261                   | 0.4193  | -2.0834 | 0.1137  | 0.1100  | 0.0325  | 0.0917   | 0.0933  | 0.0460  | 0.1936  | 0.0064  | 0.0931  |

|                      |            |         |         |        |        |        |        |        |        |        |        |        |
|----------------------|------------|---------|---------|--------|--------|--------|--------|--------|--------|--------|--------|--------|
| 1                    | 0.9594     | -0.7833 | -1.2645 | 0.1083 | 0.1109 | 0.0301 | 0.0899 | 0.0916 | 0.0752 | 0.1834 | 0.0031 | 0.0888 |
| Dipole moment (in D) | 0.96 (DEN) |         | 0.65    | 0.46   | 0.22   | 0.79   | 1.02   | 0.94   | 1.29   | 1.70   | 0.96   |        |

-----  
File TZVPMol017.out  
Molecule PMol017 trimethylamine  
SP Mol017 B3LYP/Def2TZVP VAC.

|                      |                           |         |         |         |         |         |          |         |         |         |         |         |
|----------------------|---------------------------|---------|---------|---------|---------|---------|----------|---------|---------|---------|---------|---------|
| 0                    | 13                        |         |         |         |         |         |          |         |         |         |         |         |
| Dipole               | 0.4219                    | -0.2667 | 0.0000  | 0.4991  |         |         |          |         |         |         |         |         |
| Quadrupole           | -1.3026                   | 0.1606  | 1.1420  | 1.5483  | 0.0000  | 0.0000  |          |         |         |         |         |         |
|                      | Atomic coordinates (in A) |         |         | Mul.    | Lowdin  | Hirsch. | I-Hirsch | CM5     | ESP     | NPA     | AIM     | ACP     |
| 7                    | -0.3177                   | 0.2012  | 0.0000  | -0.1698 | 0.0189  | -0.0988 | -0.1278  | -0.3820 | -0.0983 | -0.4108 | -0.9772 | -0.3645 |
| 6                    | 0.7888                    | 1.1322  | 0.0000  | -0.2475 | -0.3281 | -0.0445 | -0.1985  | -0.1329 | -0.3646 | -0.4006 | 0.3392  | -0.1258 |
| 6                    | -0.3177                   | -0.6146 | 1.1939  | -0.2473 | -0.3281 | -0.0444 | -0.1984  | -0.1329 | -0.3926 | -0.4005 | 0.3394  | -0.1257 |
| 6                    | -0.3177                   | -0.6146 | -1.1939 | -0.2473 | -0.3281 | -0.0444 | -0.1984  | -0.1329 | -0.3926 | -0.4005 | 0.3393  | -0.1257 |
| 1                    | 1.7735                    | 0.6331  | 0.0000  | 0.0803  | 0.0955  | 0.0131  | 0.0593   | 0.0724  | 0.1203  | 0.1517  | -0.0248 | 0.0659  |
| 1                    | 0.5821                    | -1.2477 | 1.2849  | 0.0803  | 0.0955  | 0.0131  | 0.0593   | 0.0724  | 0.1250  | 0.1517  | -0.0248 | 0.0659  |
| 1                    | 0.5821                    | -1.2477 | -1.2849 | 0.0803  | 0.0955  | 0.0131  | 0.0593   | 0.0724  | 0.1250  | 0.1517  | -0.0248 | 0.0659  |
| 1                    | 0.7398                    | 1.7704  | 0.8819  | 0.1119  | 0.1131  | 0.0322  | 0.0909   | 0.0940  | 0.1405  | 0.1929  | 0.0057  | 0.0907  |
| 1                    | -1.1875                   | -1.2712 | 1.1975  | 0.1119  | 0.1131  | 0.0321  | 0.0908   | 0.0940  | 0.1486  | 0.1928  | 0.0056  | 0.0907  |
| 1                    | -0.3691                   | 0.0189  | -2.0790 | 0.1118  | 0.1131  | 0.0322  | 0.0909   | 0.0940  | 0.1498  | 0.1928  | 0.0056  | 0.0907  |
| 1                    | 0.7398                    | 1.7704  | -0.8819 | 0.1119  | 0.1131  | 0.0322  | 0.0909   | 0.0940  | 0.1405  | 0.1929  | 0.0057  | 0.0907  |
| 1                    | -0.3691                   | 0.0189  | 2.0790  | 0.1118  | 0.1131  | 0.0322  | 0.0909   | 0.0940  | 0.1498  | 0.1928  | 0.0056  | 0.0907  |
| 1                    | -1.1875                   | -1.2712 | -1.1975 | 0.1119  | 0.1131  | 0.0321  | 0.0908   | 0.0940  | 0.1486  | 0.1928  | 0.0056  | 0.0907  |
| Dipole moment (in D) | 0.50 (DEN)                |         | 0.39    | 0.22    | 0.06    | 0.20    | 0.91     | 0.55    | 1.14    | 1.59    | 0.81    |         |

-----  
File TZVPMol018.out  
Molecule PMol018 ethylamine  
SP Mol018 B3LYP/Def2TZVP VAC.

|                      |                           |         |         |         |         |         |          |         |         |         |         |         |
|----------------------|---------------------------|---------|---------|---------|---------|---------|----------|---------|---------|---------|---------|---------|
| 0                    | 10                        |         |         |         |         |         |          |         |         |         |         |         |
| Dipole               | -1.0218                   | -0.8755 | 0.0000  | 1.3456  |         |         |          |         |         |         |         |         |
| Quadrupole           | -3.2602                   | 1.1746  | 2.0856  | -2.3313 | 0.0000  | 0.0000  |          |         |         |         |         |         |
|                      | Atomic coordinates (in A) |         |         | Mul.    | Lowdin  | Hirsch. | I-Hirsch | CM5     | ESP     | NPA     | AIM     | ACP     |
| 1                    | 1.3313                    | -0.7911 | 0.8073  | 0.1939  | 0.1419  | 0.0906  | 0.2968   | 0.2786  | 0.3502  | 0.3393  | 0.3261  | 0.2224  |
| 7                    | 1.2923                    | -0.1817 | 0.0000  | -0.4745 | -0.1721 | -0.2151 | -0.7778  | -0.6713 | -0.9926 | -0.8067 | -0.9910 | -0.5926 |
| 6                    | 0.0417                    | 0.5686  | -0.0000 | -0.0659 | -0.3732 | -0.0086 | 0.0929   | -0.0669 | 0.5242  | -0.2088 | 0.3734  | -0.0137 |
| 6                    | -1.2301                   | -0.2616 | 0.0000  | -0.3198 | -0.3279 | -0.0941 | -0.3618  | -0.2417 | -0.4181 | -0.6090 | -0.0004 | -0.2503 |
| 1                    | 0.0529                    | 1.2299  | 0.8690  | 0.0948  | 0.1247  | 0.0287  | 0.0794   | 0.0931  | -0.0337 | 0.1792  | -0.0030 | 0.0862  |
| 1                    | 0.0529                    | 1.2298  | -0.8690 | 0.0948  | 0.1247  | 0.0287  | 0.0794   | 0.0931  | -0.0337 | 0.1792  | -0.0030 | 0.0862  |
| 1                    | -2.1234                   | 0.3639  | -0.0000 | 0.0967  | 0.1166  | 0.0301  | 0.0994   | 0.0815  | 0.0749  | 0.2026  | -0.0035 | 0.0832  |
| 1                    | -1.2803                   | -0.9058 | 0.8789  | 0.0931  | 0.1117  | 0.0245  | 0.0975   | 0.0776  | 0.0893  | 0.1924  | -0.0123 | 0.0781  |
| 1                    | -1.2803                   | -0.9058 | -0.8789 | 0.0931  | 0.1117  | 0.0245  | 0.0975   | 0.0776  | 0.0893  | 0.1924  | -0.0123 | 0.0781  |
| 1                    | 1.3313                    | -0.7911 | -0.8073 | 0.1939  | 0.1419  | 0.0906  | 0.2968   | 0.2786  | 0.3502  | 0.3393  | 0.3261  | 0.2224  |
| Dipole moment (in D) | 1.35 (DEN)                |         | 0.76    | 0.84    | 0.31    | 1.21    | 1.25     | 1.32    | 1.70    | 1.80    | 1.20    |         |



-----  
 File TZVPMol019.out  
 Molecule PMol019 propylamine  
 SP Mol019 B3LYP/Def2TZVP VAC.  
 0 13

Dipole -0.1781 1.4003 0.0000 1.4116  
 Quadropole 1.9524 -4.5309 2.5785 -1.9269 0.0000 0.0000

|   | Atomic coordinates (in A) |         |         | Mul.    | Lowdin  | Hirsch. | I-Hirsch | CM5     | ESP     | NPA     | AIM     | ACP     |
|---|---------------------------|---------|---------|---------|---------|---------|----------|---------|---------|---------|---------|---------|
| 6 | 1.4187                    | 1.2843  | 0.0000  | -0.3351 | -0.3108 | -0.0843 | -0.3317  | -0.2360 | -0.2701 | -0.5890 | 0.0097  | -0.2477 |
| 6 | 0.0000                    | 0.7486  | 0.0000  | -0.1493 | -0.3121 | -0.0555 | -0.1590  | -0.1646 | 0.1029  | -0.4014 | 0.0416  | -0.1402 |
| 1 | 1.4469                    | 2.3726  | 0.0000  | 0.1108  | 0.1167  | 0.0297  | 0.1011   | 0.0810  | 0.0844  | 0.2047  | -0.0031 | 0.0832  |
| 1 | 1.9707                    | 0.9442  | 0.8770  | 0.1020  | 0.1170  | 0.0279  | 0.0965   | 0.0797  | 0.0438  | 0.1962  | -0.0079 | 0.0801  |
| 1 | 1.9707                    | 0.9442  | -0.8770 | 0.1020  | 0.1170  | 0.0279  | 0.0965   | 0.0797  | 0.0438  | 0.1962  | -0.0078 | 0.0801  |
| 6 | -0.0539                   | -0.7732 | 0.0000  | -0.0778 | -0.3478 | -0.0110 | 0.0732   | -0.0673 | 0.4093  | -0.2000 | 0.3652  | -0.0187 |
| 1 | -0.5437                   | 1.1251  | 0.8718  | 0.0728  | 0.1259  | 0.0222  | 0.0789   | 0.0787  | -0.0347 | 0.1852  | -0.0231 | 0.0722  |
| 1 | -0.5437                   | 1.1251  | -0.8718 | 0.0728  | 0.1259  | 0.0222  | 0.0789   | 0.0787  | -0.0347 | 0.1852  | -0.0231 | 0.0722  |
| 1 | 0.4886                    | -1.1553 | -0.8694 | 0.0909  | 0.1264  | 0.0273  | 0.0785   | 0.0921  | -0.0259 | 0.1744  | -0.0063 | 0.0832  |
| 1 | 0.4886                    | -1.1553 | 0.8694  | 0.0909  | 0.1264  | 0.0273  | 0.0785   | 0.0921  | -0.0259 | 0.1744  | -0.0063 | 0.0832  |
| 7 | -1.3798                   | -1.3759 | 0.0000  | -0.4678 | -0.1690 | -0.2146 | -0.7809  | -0.6712 | -0.9506 | -0.8059 | -0.9939 | -0.5922 |
| 1 | -1.9039                   | -1.0639 | 0.8077  | 0.1940  | 0.1422  | 0.0906  | 0.2947   | 0.2785  | 0.3288  | 0.3401  | 0.3265  | 0.2223  |
| 1 | -1.9039                   | -1.0639 | -0.8077 | 0.1940  | 0.1422  | 0.0906  | 0.2947   | 0.2785  | 0.3288  | 0.3401  | 0.3265  | 0.2223  |

Dipole mement (in D) 1.41 (DEN) 0.76 0.61 0.35 1.27 1.27 1.39 1.70 1.87 1.24

-----  
 File TZVPMol020.out  
 Molecule PMol020 cyclopropylamine  
 SP Mol020 B3LYP/Def2TZVP VAC.  
 0 11

Dipole -0.7704 1.0426 0.0000 1.2964  
 Quadropole -1.8165 1.5712 0.2453 0.6863 0.0000 0.0000

|   | Atomic coordinates (in A) |         |         | Mul.    | Lowdin  | Hirsch. | I-Hirsch | CM5     | ESP     | NPA     | AIM     | ACP     |
|---|---------------------------|---------|---------|---------|---------|---------|----------|---------|---------|---------|---------|---------|
| 1 | -1.2613                   | 0.9642  | 0.0000  | 0.0781  | 0.1215  | 0.0230  | 0.0524   | 0.0874  | 0.0170  | 0.1708  | 0.0017  | 0.0750  |
| 6 | -0.3202                   | 0.4169  | 0.0000  | -0.0185 | -0.3284 | -0.0019 | 0.2040   | -0.0121 | 0.2634  | -0.0693 | 0.3216  | 0.0591  |
| 7 | 0.9060                    | 1.1657  | 0.0000  | -0.4867 | -0.1379 | -0.1989 | -0.7870  | -0.6495 | -0.8254 | -0.8126 | -1.0048 | -0.5839 |
| 1 | 0.9612                    | 1.7664  | 0.8123  | 0.2054  | 0.1488  | 0.0950  | 0.3022   | 0.2831  | 0.3174  | 0.3495  | 0.3353  | 0.2264  |
| 1 | 0.9612                    | 1.7664  | -0.8123 | 0.2054  | 0.1488  | 0.0950  | 0.3022   | 0.2831  | 0.3174  | 0.3495  | 0.3353  | 0.2264  |
| 6 | -0.3202                   | -0.8763 | -0.7489 | -0.1938 | -0.2287 | -0.0775 | -0.2695  | -0.1807 | -0.3142 | -0.4154 | -0.0497 | -0.1748 |
| 6 | -0.3202                   | -0.8763 | 0.7489  | -0.1938 | -0.2287 | -0.0775 | -0.2695  | -0.1807 | -0.3142 | -0.4154 | -0.0495 | -0.1748 |
| 1 | -1.2201                   | -1.1735 | -1.2673 | 0.1015  | 0.1233  | 0.0344  | 0.1058   | 0.0896  | 0.1192  | 0.2057  | 0.0186  | 0.0851  |
| 1 | -1.2201                   | -1.1735 | 1.2673  | 0.1015  | 0.1233  | 0.0344  | 0.1058   | 0.0896  | 0.1192  | 0.2057  | 0.0186  | 0.0851  |
| 1 | 0.6008                    | -1.1476 | -1.2439 | 0.1005  | 0.1291  | 0.0369  | 0.1269   | 0.0951  | 0.1501  | 0.2157  | 0.0365  | 0.0882  |
| 1 | 0.6008                    | -1.1476 | 1.2439  | 0.1005  | 0.1291  | 0.0369  | 0.1269   | 0.0951  | 0.1501  | 0.2157  | 0.0365  | 0.0882  |

Dipole mement (in D) 1.30 (DEN) 0.82 0.94 0.47 1.41 1.21 1.25 1.40 1.72 1.11

File TZVPMol021.out

Molecule PMol021 isopropylamine

SP Mol021 B3LYP/Def2TZVP VAC.

0 13

Dipole 0.9705 0.8612 0.0000 1.2975

Quadrupole -2.8949 2.2797 0.6153 -0.5790 0.0000 0.0000

|   | Atomic coordinates (in A) |         |         | Mul.    | Lowdin  | Hirsch. | I-Hirsch | CM5     | ESP     | NPA     | AIM     | ACP     |
|---|---------------------------|---------|---------|---------|---------|---------|----------|---------|---------|---------|---------|---------|
| 1 | 1.2155                    | 0.8191  | 0.0000  | 0.0537  | 0.1251  | 0.0122  | 0.0334   | 0.0771  | -0.1106 | 0.1462  | -0.0353 | 0.0630  |
| 6 | 0.2927                    | 0.2161  | 0.0000  | 0.1173  | -0.3951 | 0.0230  | 0.2964   | 0.0025  | 0.6724  | -0.0426 | 0.3788  | 0.0917  |
| 7 | -0.9113                   | 1.0505  | 0.0000  | -0.5019 | -0.1490 | -0.2070 | -0.8054  | -0.6615 | -0.9814 | -0.8192 | -0.9961 | -0.5938 |
| 1 | -0.9202                   | 1.6577  | 0.8097  | 0.1959  | 0.1445  | 0.0901  | 0.2988   | 0.2784  | 0.3375  | 0.3460  | 0.3274  | 0.2216  |
| 1 | -0.9202                   | 1.6577  | -0.8097 | 0.1959  | 0.1445  | 0.0901  | 0.2988   | 0.2784  | 0.3375  | 0.3460  | 0.3274  | 0.2216  |
| 6 | 0.2927                    | -0.6369 | -1.2534 | -0.3338 | -0.2899 | -0.0895 | -0.3890  | -0.2342 | -0.4189 | -0.5919 | 0.0111  | -0.2461 |
| 6 | 0.2927                    | -0.6369 | 1.2534  | -0.3338 | -0.2899 | -0.0895 | -0.3890  | -0.2342 | -0.4189 | -0.5919 | 0.0108  | -0.2461 |
| 1 | -0.5940                   | -1.2706 | -1.2813 | 0.1087  | 0.1211  | 0.0291  | 0.1193   | 0.0841  | 0.1135  | 0.2051  | 0.0071  | 0.0812  |
| 1 | 1.1728                    | -1.2773 | -1.2960 | 0.0972  | 0.1186  | 0.0293  | 0.1043   | 0.0818  | 0.0816  | 0.2017  | -0.0060 | 0.0817  |
| 1 | 0.2889                    | -0.0233 | -2.1550 | 0.0975  | 0.1152  | 0.0269  | 0.1046   | 0.0809  | 0.0960  | 0.1969  | -0.0128 | 0.0812  |
| 1 | -0.5940                   | -1.2706 | 1.2813  | 0.1087  | 0.1211  | 0.0291  | 0.1193   | 0.0841  | 0.1135  | 0.2051  | 0.0071  | 0.0812  |
| 1 | 1.1728                    | -1.2773 | 1.2960  | 0.0972  | 0.1186  | 0.0293  | 0.1043   | 0.0818  | 0.0816  | 0.2017  | -0.0060 | 0.0817  |
| 1 | 0.2889                    | -0.0233 | 2.1550  | 0.0975  | 0.1152  | 0.0269  | 0.1046   | 0.0809  | 0.0960  | 0.1969  | -0.0128 | 0.0812  |

Dipole moment (in D) 1.30 (DEN) 0.86 0.54 0.35 1.41 1.19 1.28 1.40 1.72 1.19

-----  
File TZVPMol022.out

Molecule PMol022 aziridine

SP Mol022 B3LYP/Def2TZVP VAC.

0 8

Dipole 0.0000 -0.8813 1.4732 1.7167

Quadrupole 0.5547 -1.3611 0.8064 0.0000 0.0000 2.5797

|   | Atomic coordinates (in A) |         |         | Mul.    | Lowdin  | Hirsch. | I-Hirsch | CM5     | ESP     | NPA     | AIM     | ACP     |
|---|---------------------------|---------|---------|---------|---------|---------|----------|---------|---------|---------|---------|---------|
| 1 | -0.0000                   | 1.3870  | 0.6903  | 0.1999  | 0.1568  | 0.0996  | 0.2779   | 0.2908  | 0.3517  | 0.3389  | 0.3414  | 0.2288  |
| 7 | -0.0000                   | 0.8532  | -0.1710 | -0.3637 | -0.0365 | -0.1838 | -0.4913  | -0.5178 | -0.5358 | -0.5720 | -0.9009 | -0.4856 |
| 6 | -0.7337                   | -0.3957 | 0.0228  | -0.1224 | -0.2918 | -0.0345 | -0.0853  | -0.0869 | -0.1355 | -0.2583 | 0.2273  | -0.0614 |
| 6 | 0.7337                    | -0.3957 | 0.0228  | -0.1224 | -0.2918 | -0.0345 | -0.0853  | -0.0869 | -0.2273 | -0.2583 | 0.2273  | -0.0614 |
| 1 | -1.2771                   | -0.7423 | -0.8468 | 0.1037  | 0.1185  | 0.0396  | 0.1014   | 0.1021  | 0.1408  | 0.1910  | 0.0320  | 0.0963  |
| 1 | -1.2442                   | -0.5632 | 0.9634  | 0.1006  | 0.1131  | 0.0370  | 0.0907   | 0.0984  | 0.1075  | 0.1839  | 0.0206  | 0.0936  |
| 1 | 1.2771                    | -0.7423 | -0.8468 | 0.1037  | 0.1185  | 0.0396  | 0.1014   | 0.1021  | 0.1638  | 0.1910  | 0.0320  | 0.0963  |
| 1 | 1.2442                    | -0.5632 | 0.9634  | 0.1006  | 0.1131  | 0.0370  | 0.0907   | 0.0984  | 0.1348  | 0.1839  | 0.0206  | 0.0936  |

Dipole moment (in D) 1.72 (DEN) 1.41 0.79 0.66 1.69 1.83 1.71 2.23 3.21 1.88

-----  
File TZVPMol023.out

Molecule PMol023 piperidine\_(NH\_equatoria

SP Mol023 B3LYP/Def2TZVP VAC.

0 17

Dipole 0.2375 -0.0058 0.7929 0.8277

| Quadrupole           | 1.6475                    | 0.5514  | -2.1989 | -0.0260 | 1.4033  | -0.0336 |          |         |         |         |         |         |
|----------------------|---------------------------|---------|---------|---------|---------|---------|----------|---------|---------|---------|---------|---------|
|                      | Atomic coordinates (in A) |         |         | Mul.    | Lowdin  | Hirsch. | I-Hirsch | CM5     | ESP     | NPA     | AIM     | ACP     |
| 7                    | 1.3711                    | -0.0327 | -0.3155 | -0.3172 | -0.0144 | -0.1527 | -0.5448  | -0.5164 | -0.7444 | -0.6092 | -0.9884 | -0.4900 |
| 6                    | -0.7402                   | -1.2347 | -0.2279 | -0.1423 | -0.2640 | -0.0530 | -0.1921  | -0.1579 | -0.1275 | -0.3946 | 0.0430  | -0.1420 |
| 6                    | -0.6803                   | 1.2686  | -0.2280 | -0.1420 | -0.2640 | -0.0529 | -0.1920  | -0.1579 | -0.1315 | -0.3945 | 0.0432  | -0.1420 |
| 6                    | 0.7725                    | 1.1889  | 0.2051  | -0.1079 | -0.3099 | -0.0129 | 0.0530   | -0.0643 | 0.2116  | -0.2109 | 0.3479  | -0.0261 |
| 6                    | 0.7148                    | -1.2244 | 0.2051  | -0.1078 | -0.3098 | -0.0129 | 0.0530   | -0.0643 | 0.2039  | -0.2109 | 0.3478  | -0.0261 |
| 6                    | -1.4425                   | 0.0345  | 0.2344  | -0.1526 | -0.2652 | -0.0499 | -0.1480  | -0.1583 | 0.1167  | -0.3860 | 0.0387  | -0.1445 |
| 1                    | -0.7823                   | -1.3023 | -1.3182 | 0.0738  | 0.1347  | 0.0265  | 0.0884   | 0.0847  | 0.0605  | 0.1962  | -0.0073 | 0.0744  |
| 1                    | -0.7190                   | 1.3381  | -1.3183 | 0.0737  | 0.1347  | 0.0265  | 0.0884   | 0.0847  | 0.0612  | 0.1962  | -0.0073 | 0.0744  |
| 1                    | 0.8174                    | 1.2369  | 1.3087  | 0.0652  | 0.1120  | 0.0106  | 0.0365   | 0.0733  | -0.0138 | 0.1437  | -0.0362 | 0.0606  |
| 1                    | 0.7576                    | -1.2747 | 1.3086  | 0.0652  | 0.1120  | 0.0106  | 0.0365   | 0.0733  | -0.0123 | 0.1437  | -0.0362 | 0.0606  |
| 1                    | -1.4972                   | 0.0358  | 1.3287  | 0.0738  | 0.1321  | 0.0223  | 0.0721   | 0.0785  | -0.0041 | 0.1862  | -0.0226 | 0.0694  |
| 1                    | -1.2406                   | -2.1210 | 0.1657  | 0.0842  | 0.1313  | 0.0278  | 0.0784   | 0.0829  | 0.0105  | 0.2000  | -0.0150 | 0.0777  |
| 1                    | -1.1379                   | 2.1779  | 0.1656  | 0.0842  | 0.1313  | 0.0277  | 0.0784   | 0.0829  | 0.0109  | 0.2000  | -0.0150 | 0.0777  |
| 1                    | 1.3376                    | 2.0424  | -0.1722 | 0.0922  | 0.1250  | 0.0298  | 0.0713   | 0.0942  | 0.0178  | 0.1932  | -0.0035 | 0.0872  |
| 1                    | 1.2386                    | -2.1039 | -0.1724 | 0.0922  | 0.1250  | 0.0298  | 0.0713   | 0.0942  | 0.0201  | 0.1932  | -0.0035 | 0.0872  |
| 1                    | -2.4738                   | 0.0591  | -0.1217 | 0.0904  | 0.1306  | 0.0276  | 0.0806   | 0.0823  | -0.0164 | 0.2018  | -0.0138 | 0.0776  |
| 1                    | 2.3570                    | -0.0563 | -0.0978 | 0.1748  | 0.1588  | 0.0949  | 0.2688   | 0.2880  | 0.3368  | 0.3518  | 0.3288  | 0.2238  |
| Dipole mement (in D) | 0.83 (DEN)                |         | 0.69    | 0.56    | 0.19    | 0.88    | 0.99     | 0.87    | 1.17    | 1.59    | 0.96    |         |

-----  
File TZVPMol024.out  
Molecule PMol024 piperidine\_(NH\_axial)  
SP Mol024 B3LYP/Def2TZVP VAC.  
0 17

| Dipole     | 0.0000                    | 1.0413  | -0.5768 | 1.1904  |         |         |          |         |         |         |         |         |
|------------|---------------------------|---------|---------|---------|---------|---------|----------|---------|---------|---------|---------|---------|
| Quadrupole | 1.4922                    | -3.6383 | 2.1461  | 0.0000  | 0.0000  | 1.5740  |          |         |         |         |         |         |
|            | Atomic coordinates (in A) |         |         | Mul.    | Lowdin  | Hirsch. | I-Hirsch | CM5     | ESP     | NPA     | AIM     | ACP     |
| 7          | -0.0000                   | -1.4612 | -0.1792 | -0.2876 | -0.0152 | -0.1605 | -0.5474  | -0.5225 | -0.7777 | -0.5993 | -0.9782 | -0.4935 |
| 6          | -1.2521                   | 0.7052  | -0.2305 | -0.1598 | -0.2735 | -0.0574 | -0.1974  | -0.1632 | -0.1208 | -0.4066 | 0.0286  | -0.1486 |
| 6          | 1.2521                    | 0.7052  | -0.2305 | -0.1598 | -0.2735 | -0.0574 | -0.1974  | -0.1632 | -0.1086 | -0.4066 | 0.0286  | -0.1486 |
| 6          | 1.2083                    | -0.7490 | 0.2239  | -0.1393 | -0.3130 | -0.0126 | 0.0353   | -0.0654 | 0.1347  | -0.2143 | 0.3509  | -0.0275 |
| 6          | -1.2083                   | -0.7490 | 0.2239  | -0.1393 | -0.3130 | -0.0126 | 0.0353   | -0.0654 | 0.1751  | -0.2143 | 0.3508  | -0.0275 |
| 6          | 0.0000                    | 1.4431  | 0.2235  | -0.1415 | -0.2664 | -0.0508 | -0.1501  | -0.1595 | 0.0894  | -0.3876 | 0.0383  | -0.1456 |
| 1          | -0.0000                   | -1.5714 | -1.1865 | 0.1672  | 0.1592  | 0.0899  | 0.2655   | 0.2829  | 0.3613  | 0.3381  | 0.3190  | 0.2153  |
| 1          | -1.3198                   | 0.7376  | -1.3235 | 0.0727  | 0.1294  | 0.0217  | 0.0761   | 0.0788  | 0.0402  | 0.1839  | -0.0256 | 0.0698  |
| 1          | 1.3198                    | 0.7376  | -1.3235 | 0.0727  | 0.1294  | 0.0217  | 0.0761   | 0.0788  | 0.0418  | 0.1839  | -0.0256 | 0.0698  |
| 1          | 1.2567                    | -0.7870 | 1.3180  | 0.0824  | 0.1291  | 0.0260  | 0.0709   | 0.0918  | 0.0606  | 0.1729  | -0.0093 | 0.0796  |
| 1          | -1.2567                   | -0.7870 | 1.3180  | 0.0824  | 0.1291  | 0.0260  | 0.0709   | 0.0918  | 0.0496  | 0.1729  | -0.0093 | 0.0796  |
| 1          | 0.0000                    | 1.5083  | 1.3172  | 0.0796  | 0.1337  | 0.0243  | 0.0757   | 0.0804  | 0.0007  | 0.1874  | -0.0210 | 0.0715  |
| 1          | -2.1523                   | 1.1953  | 0.1476  | 0.0844  | 0.1312  | 0.0277  | 0.0796   | 0.0825  | 0.0072  | 0.2014  | -0.0139 | 0.0775  |
| 1          | 2.1523                    | 1.1952  | 0.1476  | 0.0844  | 0.1312  | 0.0277  | 0.0796   | 0.0825  | 0.0057  | 0.2014  | -0.0139 | 0.0775  |
| 1          | 2.0749                    | -1.3026 | -0.1407 | 0.1050  | 0.1260  | 0.0296  | 0.0735   | 0.0938  | 0.0293  | 0.1927  | -0.0026 | 0.0867  |
| 1          | -2.0749                   | -1.3026 | -0.1407 | 0.1050  | 0.1260  | 0.0296  | 0.0735   | 0.0938  | 0.0203  | 0.1927  | -0.0026 | 0.0867  |
| 1          | 0.0000                    | 2.4718  | -0.1411 | 0.0915  | 0.1301  | 0.0270  | 0.0804   | 0.0817  | -0.0089 | 0.2013  | -0.0139 | 0.0771  |

Dipole mement (in D) 1.19 (DEN) 0.94 0.51 0.25 0.78 1.11 1.14 1.47 1.85 1.16

-----  
File TZVPMol025.out

Molecule PMol025 1,2,3,6-Tetrahydropyridi

SP Mol025 B3LYP/Def2TZVP VAC.

0 15

Dipole -0.2334 -0.5240 0.7976 0.9825

Quadrupole 2.2709 1.6588 -3.9297 0.5332 -0.5267 -0.8862

|   | Atomic coordinates (in A) |         |         | Mul.    | Lowdin  | Hirsch. | I-Hirsch | CM5     | ESP     | NPA     | AIM     | ACP     |
|---|---------------------------|---------|---------|---------|---------|---------|----------|---------|---------|---------|---------|---------|
| 6 | 0.5958                    | -1.1892 | 0.2992  | -0.1072 | -0.2992 | -0.0109 | 0.0527   | -0.0611 | 0.1992  | -0.2069 | 0.3561  | -0.0257 |
| 6 | 1.4734                    | -0.0260 | -0.1277 | -0.0694 | -0.2516 | -0.0532 | -0.2144  | -0.1530 | -0.0544 | -0.4345 | 0.0481  | -0.1396 |
| 6 | 0.7155                    | 1.2589  | -0.0442 | -0.1819 | -0.1728 | -0.0455 | -0.0668  | -0.1043 | -0.0971 | -0.1802 | -0.0473 | -0.0827 |
| 6 | -0.6082                   | 1.2964  | 0.0683  | -0.1385 | -0.1780 | -0.0504 | -0.1231  | -0.1064 | -0.2924 | -0.1981 | -0.0553 | -0.0839 |
| 6 | -1.4539                   | 0.0680  | 0.0635  | -0.0600 | -0.2977 | -0.0128 | 0.0338   | -0.0588 | 0.3953  | -0.2513 | 0.3532  | -0.0234 |
| 7 | -0.6886                   | -1.0872 | -0.3785 | -0.3209 | -0.0073 | -0.1512 | -0.5401  | -0.5120 | -0.7094 | -0.6030 | -0.9849 | -0.4906 |
| 1 | 1.2802                    | 2.1845  | -0.0648 | 0.0995  | 0.1365  | 0.0332  | 0.0816   | 0.0891  | 0.0957  | 0.1983  | 0.0167  | 0.0785  |
| 1 | -1.1247                   | 2.2443  | 0.1647  | 0.1009  | 0.1380  | 0.0350  | 0.0836   | 0.0911  | 0.1118  | 0.2006  | 0.0191  | 0.0806  |
| 1 | 1.8363                    | -0.1827 | -1.1484 | 0.0825  | 0.1411  | 0.0322  | 0.0957   | 0.0892  | 0.0617  | 0.2102  | 0.0072  | 0.0774  |
| 1 | 2.3657                    | 0.0212  | 0.5017  | 0.0826  | 0.1373  | 0.0317  | 0.0855   | 0.0870  | 0.0212  | 0.2051  | -0.0052 | 0.0801  |
| 1 | -2.3015                   | 0.2062  | -0.6137 | 0.0974  | 0.1334  | 0.0334  | 0.0795   | 0.0978  | -0.0079 | 0.2000  | 0.0092  | 0.0881  |
| 1 | -1.8948                   | -0.0638 | 1.0690  | 0.0751  | 0.1204  | 0.0174  | 0.0464   | 0.0792  | -0.0438 | 0.1653  | -0.0191 | 0.0664  |
| 1 | 0.4949                    | -1.1755 | 1.3981  | 0.0673  | 0.1151  | 0.0127  | 0.0405   | 0.0757  | -0.0050 | 0.1480  | -0.0292 | 0.0598  |
| 1 | 1.0554                    | -2.1417 | 0.0348  | 0.0964  | 0.1253  | 0.0314  | 0.0737   | 0.0960  | 0.0131  | 0.1935  | -0.0017 | 0.0892  |
| 1 | -1.2270                   | -1.9306 | -0.2460 | 0.1761  | 0.1595  | 0.0968  | 0.2713   | 0.2903  | 0.3118  | 0.3530  | 0.3319  | 0.2258  |

Dipole mement (in D) 0.98 (DEN) 0.81 1.03 0.35 0.97 1.09 1.01 1.27 1.63 0.96

-----  
File TZVPMol026.out

Molecule PMol026 1,2,3,6-Tetrahydropyridi

SP Mol026 B3LYP/Def2TZVP VAC.

0 15

Dipole -0.5119 0.6955 -0.4815 0.9887

Quadrupole 1.9061 -2.6535 0.7474 1.9561 -0.2283 0.9171

|   | Atomic coordinates (in A) |         |         | Mul.    | Lowdin  | Hirsch. | I-Hirsch | CM5     | ESP     | NPA     | AIM     | ACP     |
|---|---------------------------|---------|---------|---------|---------|---------|----------|---------|---------|---------|---------|---------|
| 6 | -0.7535                   | -1.1013 | 0.3143  | -0.1219 | -0.3008 | -0.0102 | 0.0349   | -0.0618 | 0.2550  | -0.2107 | 0.3559  | -0.0269 |
| 6 | -1.4598                   | 0.1795  | -0.1157 | -0.1390 | -0.2630 | -0.0579 | -0.2223  | -0.1588 | -0.0458 | -0.4502 | 0.0300  | -0.1472 |
| 6 | -0.5249                   | 1.3458  | -0.0549 | -0.1339 | -0.1779 | -0.0497 | -0.0747  | -0.1090 | -0.1347 | -0.1881 | -0.0572 | -0.0874 |
| 6 | 0.7914                    | 1.1967  | 0.0626  | -0.1633 | -0.1842 | -0.0552 | -0.1328  | -0.1120 | -0.2891 | -0.2085 | -0.0711 | -0.0903 |
| 6 | 1.4498                    | -0.1481 | 0.0864  | -0.0859 | -0.3018 | -0.0126 | 0.0169   | -0.0604 | 0.3252  | -0.2565 | 0.3541  | -0.0253 |
| 7 | 0.5735                    | -1.2588 | -0.2705 | -0.3009 | -0.0106 | -0.1589 | -0.5435  | -0.5182 | -0.8241 | -0.5939 | -0.9721 | -0.4921 |
| 1 | -0.9536                   | 2.3412  | -0.0954 | 0.1031  | 0.1362  | 0.0325  | 0.0824   | 0.0883  | 0.1068  | 0.1983  | 0.0167  | 0.0778  |
| 1 | 1.4331                    | 2.0675  | 0.1495  | 0.0959  | 0.1367  | 0.0335  | 0.0832   | 0.0893  | 0.1097  | 0.1992  | 0.0174  | 0.0787  |
| 1 | -2.3322                   | 0.3642  | 0.5175  | 0.0871  | 0.1385  | 0.0327  | 0.0890   | 0.0877  | 0.0130  | 0.2083  | -0.0021 | 0.0810  |
| 1 | -1.8630                   | 0.0718  | -1.1297 | 0.0865  | 0.1363  | 0.0275  | 0.0846   | 0.0835  | 0.0411  | 0.1997  | -0.0087 | 0.0739  |
| 1 | 1.8670                    | -0.3364 | 1.0843  | 0.0955  | 0.1347  | 0.0297  | 0.0760   | 0.0939  | 0.0300  | 0.1893  | 0.0053  | 0.0815  |
| 1 | 2.3107                    | -0.1602 | -0.5860 | 0.1068  | 0.1340  | 0.0357  | 0.0834   | 0.1002  | 0.0058  | 0.2006  | 0.0087  | 0.0913  |

|   |         |         |         |        |        |        |        |        |         |        |         |        |
|---|---------|---------|---------|--------|--------|--------|--------|--------|---------|--------|---------|--------|
| 1 | -1.3511 | -1.9816 | 0.0746  | 0.1094 | 0.1261 | 0.0304 | 0.0753 | 0.0946 | -0.0101 | 0.1929 | -0.0002 | 0.0876 |
| 1 | -0.6284 | -1.0980 | 1.4010  | 0.0873 | 0.1328 | 0.0296 | 0.0773 | 0.0960 | 0.0431  | 0.1784 | -0.0014 | 0.0808 |
| 1 | 0.4848  | -1.2927 | -1.2785 | 0.1734 | 0.1629 | 0.0926 | 0.2700 | 0.2863 | 0.3742  | 0.3413 | 0.3249  | 0.2162 |

Dipole moment (in D) 0.99 (DEN) 0.46 0.81 0.18 0.74 0.93 0.93 1.52 1.54 1.06

-----  
File TZVPMol027.out

Molecule PMol027 aniline  
SP Mol027 B3LYP/Def2TZVP VAC.  
0 14

Dipole -0.9489 1.3727 0.0000 1.6687  
Quadrupole -7.0215 4.4643 2.5572 -3.0894 0.0000 0.0000

|   | Atomic coordinates (in A) |         |         | Mul.    | Lowdin  | Hirsch. | I-Hirsch | CM5     | ESP     | NPA     | AIM     | ACP     |
|---|---------------------------|---------|---------|---------|---------|---------|----------|---------|---------|---------|---------|---------|
| 6 | 0.0021                    | 0.9333  | 0.0000  | 0.2967  | -0.2424 | 0.0428  | 0.3908   | 0.0924  | 0.3853  | 0.1545  | 0.3786  | 0.1680  |
| 6 | 0.0019                    | 0.2199  | 1.2019  | -0.2214 | -0.1383 | -0.0666 | -0.2348  | -0.1153 | -0.2654 | -0.2612 | -0.0346 | -0.1101 |
| 6 | 0.0019                    | 0.2199  | -1.2019 | -0.2214 | -0.1383 | -0.0666 | -0.2348  | -0.1153 | -0.2654 | -0.2612 | -0.0345 | -0.1101 |
| 6 | 0.0019                    | -1.1650 | 1.1961  | -0.0933 | -0.1438 | -0.0412 | -0.0515  | -0.0969 | -0.1273 | -0.1825 | -0.0219 | -0.0833 |
| 6 | 0.0019                    | -1.1650 | -1.1961 | -0.0933 | -0.1438 | -0.0412 | -0.0515  | -0.0969 | -0.1273 | -0.1825 | -0.0217 | -0.0833 |
| 6 | 0.0022                    | -1.8710 | 0.0000  | -0.1488 | -0.1676 | -0.0633 | -0.1515  | -0.1193 | -0.1192 | -0.2541 | -0.0336 | -0.1079 |
| 1 | 0.0060                    | 0.7613  | 2.1411  | 0.0944  | 0.1392  | 0.0340  | 0.1058   | 0.0930  | 0.1491  | 0.2000  | 0.0151  | 0.0789  |
| 1 | 0.0060                    | 0.7613  | -2.1411 | 0.0944  | 0.1392  | 0.0340  | 0.1058   | 0.0930  | 0.1491  | 0.2000  | 0.0151  | 0.0789  |
| 1 | 0.0003                    | -1.6975 | 2.1392  | 0.1028  | 0.1418  | 0.0387  | 0.0920   | 0.0949  | 0.1218  | 0.2052  | 0.0251  | 0.0822  |
| 1 | 0.0003                    | -1.6975 | -2.1392 | 0.1028  | 0.1418  | 0.0387  | 0.0920   | 0.0949  | 0.1218  | 0.2052  | 0.0251  | 0.0822  |
| 1 | 0.0010                    | -2.9525 | 0.0000  | 0.1013  | 0.1385  | 0.0348  | 0.0913   | 0.0909  | 0.1024  | 0.2068  | 0.0227  | 0.0781  |
| 7 | 0.0665                    | 2.3216  | 0.0000  | -0.4495 | -0.0450 | -0.1696 | -0.8335  | -0.6239 | -0.7841 | -0.7696 | -1.0817 | -0.5589 |
| 1 | -0.2749                   | 2.7703  | -0.8328 | 0.2176  | 0.1593  | 0.1127  | 0.3399   | 0.3043  | 0.3296  | 0.3697  | 0.3731  | 0.2426  |
| 1 | -0.2749                   | 2.7703  | 0.8328  | 0.2176  | 0.1593  | 0.1127  | 0.3399   | 0.3043  | 0.3296  | 0.3697  | 0.3731  | 0.2426  |

Dipole moment (in D) 1.67 (DEN) 1.75 2.26 1.36 1.48 1.65 1.75 1.52 1.45 1.13

-----  
File TZVPMol028.out

Molecule PMol028 pyrrole  
SP Mol028 B3LYP/Def2TZVP VAC.  
0 10

Dipole -1.9141 0.0000 -0.0001 1.9141  
Quadrupole 4.4845 1.1726 -5.6571 0.0001 0.0005 0.0001

|   | Atomic coordinates (in A) |         |         | Mul.    | Lowdin  | Hirsch. | I-Hirsch | CM5     | ESP     | NPA     | AIM     | ACP     |
|---|---------------------------|---------|---------|---------|---------|---------|----------|---------|---------|---------|---------|---------|
| 7 | -1.1156                   | -0.0000 | -0.0001 | -0.2188 | 0.1789  | -0.0505 | -0.3662  | -0.4188 | -0.1152 | -0.4857 | -1.1969 | -0.3887 |
| 6 | -0.3300                   | -1.1197 | -0.0000 | -0.0596 | -0.2397 | -0.0357 | 0.0177   | -0.0228 | -0.2080 | -0.0808 | 0.3389  | 0.0091  |
| 6 | 0.9782                    | -0.7076 | -0.0000 | -0.1698 | -0.2008 | -0.0918 | -0.2002  | -0.1386 | -0.1815 | -0.2980 | -0.0408 | -0.1249 |
| 1 | 1.8396                    | -1.3540 | -0.0000 | 0.1044  | 0.1329  | 0.0385  | 0.1091   | 0.0948  | 0.1461  | 0.2158  | 0.0396  | 0.0814  |
| 6 | -0.3300                   | 1.1197  | 0.0000  | -0.0596 | -0.2397 | -0.0357 | 0.0177   | -0.0228 | -0.2080 | -0.0808 | 0.3390  | 0.0091  |
| 6 | 0.9782                    | 0.7077  | 0.0001  | -0.1698 | -0.2008 | -0.0918 | -0.2002  | -0.1386 | -0.1815 | -0.2980 | -0.0409 | -0.1249 |
| 1 | -0.7649                   | -2.1040 | -0.0000 | 0.1278  | 0.1268  | 0.0438  | 0.0958   | 0.1079  | 0.1597  | 0.2052  | 0.0545  | 0.0950  |
| 1 | 1.8395                    | 1.3541  | 0.0002  | 0.1044  | 0.1329  | 0.0385  | 0.1091   | 0.0948  | 0.1461  | 0.2158  | 0.0396  | 0.0814  |
| 1 | -0.7650                   | 2.1039  | -0.0000 | 0.1278  | 0.1268  | 0.0438  | 0.0958   | 0.1079  | 0.1597  | 0.2052  | 0.0545  | 0.0950  |

|                      |            |         |         |        |        |        |        |        |        |        |        |        |
|----------------------|------------|---------|---------|--------|--------|--------|--------|--------|--------|--------|--------|--------|
| 1                    | -2.1183    | -0.0001 | -0.0001 | 0.2133 | 0.1826 | 0.1410 | 0.3213 | 0.3361 | 0.2827 | 0.4013 | 0.4125 | 0.2676 |
| Dipole moment (in D) | 1.91 (DEN) |         |         | 1.50   | 2.53   | 1.55   | 2.02   | 1.52   | 1.90   | 1.72   | 1.06   | 1.10   |

-----  
File TZVPMol029.out  
Molecule PMol029 pyridine  
SP Mol029 B3LYP/Def2TZVP VAC.

|                      |                           |         |         |         |         |         |          |         |         |         |         |         |
|----------------------|---------------------------|---------|---------|---------|---------|---------|----------|---------|---------|---------|---------|---------|
| 0                    | 11                        |         |         |         |         |         |          |         |         |         |         |         |
| Dipole               | 0.0000                    | 0.0000  | -2.2364 | 2.2364  |         |         |          |         |         |         |         |         |
| Quadrupole           | -3.1522                   | 5.0022  | -1.8500 | 0.0000  | 0.0000  | 0.0000  |          |         |         |         |         |         |
|                      | Atomic coordinates (in A) |         |         | Mul.    | Lowdin  | Hirsch. | I-Hirsch | CM5     | ESP     | NPA     | AIM     | ACP     |
| 6                    | 0.0000                    | 0.0000  | -1.3768 | -0.1022 | -0.1222 | -0.0207 | -0.0287  | -0.0744 | 0.2940  | -0.1707 | -0.0214 | -0.0616 |
| 6                    | 0.0000                    | 1.1918  | -0.6691 | -0.0990 | -0.1494 | -0.0426 | -0.1742  | -0.0931 | -0.5316 | -0.2500 | -0.0345 | -0.0818 |
| 6                    | 0.0000                    | -1.1918 | -0.6691 | -0.0990 | -0.1494 | -0.0426 | -0.1742  | -0.0931 | -0.5316 | -0.2500 | -0.0346 | -0.0818 |
| 6                    | 0.0000                    | 1.1369  | 0.7182  | -0.0378 | -0.2060 | 0.0216  | 0.1460   | 0.0457  | 0.5131  | 0.0322  | 0.5057  | 0.0812  |
| 6                    | 0.0000                    | -1.1369 | 0.7182  | -0.0378 | -0.2060 | 0.0216  | 0.1460   | 0.0457  | 0.5131  | 0.0322  | 0.5059  | 0.0812  |
| 7                    | 0.0000                    | 0.0000  | 1.4120  | -0.2132 | 0.1284  | -0.1613 | -0.3776  | -0.3558 | -0.6785 | -0.4090 | -1.1221 | -0.3982 |
| 1                    | 0.0000                    | 2.1469  | -1.1779 | 0.1140  | 0.1440  | 0.0459  | 0.1057   | 0.1023  | 0.1787  | 0.2138  | 0.0400  | 0.0908  |
| 1                    | 0.0000                    | -2.1469 | -1.1779 | 0.1140  | 0.1440  | 0.0459  | 0.1057   | 0.1023  | 0.1787  | 0.2138  | 0.0400  | 0.0908  |
| 1                    | 0.0000                    | 2.0527  | 1.3017  | 0.1192  | 0.1358  | 0.0419  | 0.0749   | 0.1079  | 0.0037  | 0.1880  | 0.0398  | 0.0930  |
| 1                    | 0.0000                    | -2.0527 | 1.3017  | 0.1192  | 0.1358  | 0.0419  | 0.0749   | 0.1079  | 0.0037  | 0.1880  | 0.0398  | 0.0930  |
| 1                    | 0.0000                    | 0.0000  | -2.4597 | 0.1228  | 0.1449  | 0.0485  | 0.1015   | 0.1045  | 0.0566  | 0.2115  | 0.0412  | 0.0936  |
| Dipole moment (in D) | 2.24 (DEN)                |         |         | 1.64    | 0.43    | 1.10    | 1.70     | 2.05    | 2.23    | 2.38    | 4.20    | 2.18    |

-----  
File TZVPMol030.out  
Molecule PMol030 2-methylpyridine  
SP Mol030 B3LYP/Def2TZVP VAC.

|            |                           |         |         |         |         |         |          |         |         |         |         |         |
|------------|---------------------------|---------|---------|---------|---------|---------|----------|---------|---------|---------|---------|---------|
| 0          | 14                        |         |         |         |         |         |          |         |         |         |         |         |
| Dipole     | -0.6737                   | 1.7281  | 0.0000  | 1.8548  |         |         |          |         |         |         |         |         |
| Quadrupole | 4.0444                    | -0.6742 | -3.3701 | 1.7738  | 0.0000  | 0.0000  |          |         |         |         |         |         |
|            | Atomic coordinates (in A) |         |         | Mul.    | Lowdin  | Hirsch. | I-Hirsch | CM5     | ESP     | NPA     | AIM     | ACP     |
| 6          | 0.8743                    | 0.0064  | -0.0000 | 0.1838  | -0.2394 | 0.0645  | 0.3773   | 0.1249  | 0.8969  | 0.2034  | 0.4971  | 0.1967  |
| 6          | 0.1583                    | 1.2021  | -0.0000 | -0.1687 | -0.1270 | -0.0493 | -0.2255  | -0.0975 | -0.6119 | -0.2498 | -0.0364 | -0.0939 |
| 6          | -1.2265                   | 1.1640  | -0.0000 | -0.0877 | -0.1219 | -0.0228 | -0.0175  | -0.0764 | 0.2501  | -0.1632 | -0.0233 | -0.0632 |
| 6          | -1.8605                   | -0.0678 | 0.0000  | -0.1065 | -0.1564 | -0.0498 | -0.1899  | -0.1002 | -0.5107 | -0.2627 | -0.0372 | -0.0889 |
| 6          | -1.0678                   | -1.2067 | 0.0000  | -0.0523 | -0.2056 | 0.0202  | 0.1554   | 0.0449  | 0.4371  | 0.0425  | 0.5115  | 0.0805  |
| 7          | 0.2619                    | -1.1848 | 0.0000  | -0.2303 | 0.1522  | -0.1628 | -0.4136  | -0.3542 | -0.7179 | -0.4214 | -1.1277 | -0.4087 |
| 1          | -1.8009                   | 2.0823  | -0.0000 | 0.1191  | 0.1446  | 0.0472  | 0.1006   | 0.1033  | 0.0706  | 0.2102  | 0.0387  | 0.0920  |
| 1          | 0.6864                    | 2.1476  | -0.0000 | 0.1071  | 0.1446  | 0.0411  | 0.1099   | 0.0983  | 0.1848  | 0.2095  | 0.0317  | 0.0850  |
| 1          | -2.9393                   | -0.1483 | 0.0000  | 0.1115  | 0.1429  | 0.0440  | 0.1051   | 0.1004  | 0.1758  | 0.2135  | 0.0377  | 0.0887  |
| 1          | -1.5266                   | -2.1915 | 0.0000  | 0.1141  | 0.1353  | 0.0403  | 0.0736   | 0.1064  | 0.0254  | 0.1867  | 0.0368  | 0.0911  |
| 6          | 2.3673                    | -0.0133 | 0.0000  | -0.3346 | -0.2533 | -0.0868 | -0.4567  | -0.2260 | -0.7488 | -0.6205 | 0.0162  | -0.2453 |
| 1          | 2.7432                    | -0.5467 | 0.8725  | 0.1205  | 0.1314  | 0.0404  | 0.1331   | 0.0949  | 0.1878  | 0.2243  | 0.0271  | 0.0906  |
| 1          | 2.7432                    | -0.5468 | -0.8724 | 0.1205  | 0.1314  | 0.0404  | 0.1331   | 0.0949  | 0.1878  | 0.2243  | 0.0271  | 0.0906  |
| 1          | 2.7899                    | 0.9888  | -0.0000 | 0.1034  | 0.1214  | 0.0333  | 0.1150   | 0.0865  | 0.1731  | 0.2033  | 0.0007  | 0.0849  |

Dipole moment (in D) 1.85 (DEN) 1.11 0.73 0.82 1.51 1.68 1.84 1.99 3.68 1.86

-----  
File TZVPMol031.out

Molecule PMol031 4-methylpyridine

SP Mol031 B3LYP/Def2TZVP VAC.

0 14

Dipole 0.0508 2.7483 0.0000 2.7488  
Quadrupole -2.1895 -3.0255 5.2150 0.0886 0.0000 0.0000

|   | Atomic coordinates (in A) |         |         | Mul.    | Lowdin  | Hirsch. | I-Hirsch | CM5     | ESP     | NPA     | AIM     | ACP     |
|---|---------------------------|---------|---------|---------|---------|---------|----------|---------|---------|---------|---------|---------|
| 6 | -0.0067                   | -1.2142 | 1.1329  | -0.0425 | -0.2070 | 0.0191  | 0.1553   | 0.0432  | 0.5235  | 0.0383  | 0.5025  | 0.0791  |
| 6 | -0.0067                   | 0.1710  | 1.1850  | -0.1292 | -0.1272 | -0.0498 | -0.2328  | -0.0980 | -0.6868 | -0.2520 | -0.0424 | -0.0945 |
| 6 | -0.0041                   | 0.9015  | 0.0000  | 0.1045  | -0.1586 | 0.0229  | 0.2173   | 0.0071  | 0.7312  | 0.0179  | -0.0029 | 0.0589  |
| 6 | -0.0067                   | 0.1710  | -1.1850 | -0.1292 | -0.1272 | -0.0498 | -0.2328  | -0.0980 | -0.6868 | -0.2520 | -0.0424 | -0.0945 |
| 6 | -0.0067                   | -1.2142 | -1.1329 | -0.0425 | -0.2070 | 0.0191  | 0.1553   | 0.0432  | 0.5235  | 0.0383  | 0.5024  | 0.0791  |
| 7 | -0.0061                   | -1.9157 | 0.0000  | -0.2149 | 0.1225  | -0.1678 | -0.3890  | -0.3618 | -0.6978 | -0.4165 | -1.1208 | -0.4046 |
| 1 | -0.0120                   | 0.6787  | -2.1425 | 0.1050  | 0.1452  | 0.0417  | 0.1106   | 0.0987  | 0.2024  | 0.2087  | 0.0311  | 0.0855  |
| 1 | -0.0103                   | -1.7923 | -2.0525 | 0.1158  | 0.1355  | 0.0406  | 0.0746   | 0.1066  | 0.0121  | 0.1869  | 0.0373  | 0.0914  |
| 1 | -0.0103                   | -1.7923 | 2.0525  | 0.1158  | 0.1355  | 0.0406  | 0.0746   | 0.1066  | 0.0121  | 0.1869  | 0.0373  | 0.0914  |
| 6 | 0.0237                    | 2.3947  | 0.0000  | -0.3583 | -0.2467 | -0.0781 | -0.4146  | -0.2232 | -0.5733 | -0.6175 | 0.0143  | -0.2473 |
| 1 | -0.4609                   | 2.8079  | 0.8826  | 0.1209  | 0.1281  | 0.0390  | 0.1221   | 0.0916  | 0.1455  | 0.2151  | 0.0148  | 0.0900  |
| 1 | 1.0514                    | 2.7623  | 0.0000  | 0.1286  | 0.1335  | 0.0416  | 0.1266   | 0.0936  | 0.1464  | 0.2221  | 0.0226  | 0.0901  |
| 1 | -0.4609                   | 2.8079  | -0.8826 | 0.1209  | 0.1281  | 0.0390  | 0.1221   | 0.0916  | 0.1455  | 0.2151  | 0.0148  | 0.0900  |
| 1 | -0.0120                   | 0.6787  | 2.1425  | 0.1050  | 0.1452  | 0.0417  | 0.1106   | 0.0987  | 0.2024  | 0.2087  | 0.0311  | 0.0855  |

Dipole moment (in D) 2.75 (DEN) 2.25 1.40 1.62 1.97 2.65 2.74 2.84 4.79 2.66

-----  
File TZVPMol032.out

Molecule PMol032 indole

SP Mol032 B3LYP/Def2TZVP VAC.

0 16

Dipole -0.9023 1.9937 0.0000 2.1884  
Quadrupole 1.8228 6.6583 -8.4810 -2.1036 0.0000 0.0000

|   | Atomic coordinates (in A) |         |        | Mul.    | Lowdin  | Hirsch. | I-Hirsch | CM5     | ESP     | NPA     | AIM     | ACP     |
|---|---------------------------|---------|--------|---------|---------|---------|----------|---------|---------|---------|---------|---------|
| 6 | 1.3595                    | 1.0039  | 0.0000 | -0.2140 | -0.1348 | -0.0615 | -0.2141  | -0.1103 | -0.3200 | -0.2350 | -0.0206 | -0.1054 |
| 6 | 2.2398                    | -0.0624 | 0.0000 | -0.1036 | -0.1527 | -0.0520 | -0.0892  | -0.1076 | -0.1279 | -0.2114 | -0.0259 | -0.0958 |
| 6 | 1.7770                    | -1.3863 | 0.0000 | -0.1081 | -0.1590 | -0.0577 | -0.1263  | -0.1135 | -0.1323 | -0.2307 | -0.0300 | -0.1022 |
| 6 | 0.4257                    | -1.6714 | 0.0000 | -0.1963 | -0.1121 | -0.0450 | -0.1174  | -0.0975 | -0.3485 | -0.1820 | -0.0215 | -0.0934 |
| 6 | -0.4920                   | -0.6156 | 0.0000 | 0.1383  | -0.1233 | -0.0279 | 0.0275   | -0.0268 | 0.3588  | -0.0960 | -0.0092 | -0.0009 |
| 6 | 0.0000                    | 0.7124  | 0.0000 | 0.1486  | -0.1632 | 0.0278  | 0.2444   | 0.0887  | 0.2742  | 0.1177  | 0.3706  | 0.1339  |
| 7 | -1.0911                   | 1.5465  | 0.0000 | -0.2523 | 0.1957  | -0.0587 | -0.4615  | -0.4182 | -0.5021 | -0.4973 | -1.1896 | -0.4025 |
| 6 | -2.2412                   | 0.7923  | 0.0000 | 0.0003  | -0.2061 | -0.0138 | 0.0731   | -0.0016 | 0.0320  | -0.0279 | 0.3454  | 0.0301  |
| 6 | -1.9159                   | -0.5322 | 0.0000 | -0.2536 | -0.1571 | -0.0892 | -0.2715  | -0.1341 | -0.5559 | -0.2905 | -0.0369 | -0.1315 |
| 1 | 1.7170                    | 2.0263  | 0.0000 | 0.0949  | 0.1398  | 0.0367  | 0.1032   | 0.0944  | 0.1596  | 0.2060  | 0.0240  | 0.0799  |
| 1 | 3.3052                    | 0.1280  | 0.0000 | 0.1023  | 0.1403  | 0.0358  | 0.0914   | 0.0920  | 0.1234  | 0.2057  | 0.0234  | 0.0791  |
| 1 | 2.4960                    | -2.1953 | 0.0000 | 0.0998  | 0.1397  | 0.0346  | 0.0900   | 0.0907  | 0.1237  | 0.2057  | 0.0213  | 0.0777  |

|   |         |         |        |        |        |        |        |        |        |        |        |        |
|---|---------|---------|--------|--------|--------|--------|--------|--------|--------|--------|--------|--------|
| 1 | 0.0787  | -2.6975 | 0.0000 | 0.0967 | 0.1423 | 0.0385 | 0.0955 | 0.0949 | 0.1717 | 0.2061 | 0.0270 | 0.0796 |
| 1 | -1.0567 | 2.5484  | 0.0000 | 0.2105 | 0.1831 | 0.1410 | 0.3352 | 0.3366 | 0.3733 | 0.4027 | 0.4151 | 0.2664 |
| 1 | -3.2058 | 1.2715  | 0.0000 | 0.1317 | 0.1305 | 0.0497 | 0.1013 | 0.1138 | 0.1456 | 0.2072 | 0.0605 | 0.1015 |
| 1 | -2.6148 | -1.3516 | 0.0000 | 0.1049 | 0.1368 | 0.0417 | 0.1183 | 0.0982 | 0.2247 | 0.2196 | 0.0459 | 0.0837 |

Dipole mement (in D) 2.19 (DEN) 2.01 2.61 1.89 2.12 1.84 2.15 1.81 1.20 1.47

-----  
 File TZVPMol033.out  
 Molecule PMol033 quinoline  
 SP Mol033 B3LYP/Def2TZVP VAC.  
 0 17

|            |                           |         |         |         |         |         |          |         |         |         |         |         |
|------------|---------------------------|---------|---------|---------|---------|---------|----------|---------|---------|---------|---------|---------|
| Dipole     | 0.1196                    | -2.0627 | 0.0000  | 2.0662  |         |         |          |         |         |         |         |         |
| Quadrupole | 7.0753                    | -0.7553 | -6.3201 | 2.4507  | 0.0000  | 0.0000  |          |         |         |         |         |         |
|            | Atomic coordinates (in A) |         |         | Mul.    | Lowdin  | Hirsch. | I-Hirsch | CM5     | ESP     | NPA     | AIM     | ACP     |
| 6          | 0.0000                    | 0.7030  | 0.0000  | 0.1762  | -0.1650 | 0.0456  | 0.2644   | 0.1125  | 0.6967  | 0.1374  | 0.4435  | 0.1604  |
| 6          | 1.2551                    | 1.3476  | 0.0000  | -0.2210 | -0.0958 | -0.0374 | -0.1770  | -0.0843 | -0.3561 | -0.1822 | -0.0197 | -0.0769 |
| 6          | 2.4121                    | 0.6143  | 0.0000  | -0.0638 | -0.1333 | -0.0346 | -0.0769  | -0.0901 | -0.0757 | -0.1978 | -0.0249 | -0.0794 |
| 6          | 2.3695                    | -0.7935 | 0.0000  | -0.1020 | -0.1375 | -0.0384 | -0.0952  | -0.0942 | -0.1743 | -0.2017 | -0.0239 | -0.0832 |
| 6          | 1.1666                    | -1.4487 | 0.0000  | -0.1780 | -0.1024 | -0.0383 | -0.1254  | -0.0913 | -0.1525 | -0.1787 | -0.0265 | -0.0885 |
| 6          | -0.0434                   | -0.7224 | 0.0000  | 0.0875  | -0.1018 | -0.0058 | 0.0149   | -0.0083 | -0.1679 | -0.0975 | -0.0080 | 0.0169  |
| 6          | -1.3130                   | -1.3340 | 0.0000  | -0.1421 | -0.0811 | -0.0197 | -0.0635  | -0.0707 | 0.0689  | -0.1370 | -0.0229 | -0.0663 |
| 6          | -2.4345                   | -0.5513 | 0.0000  | -0.1067 | -0.1505 | -0.0458 | -0.1868  | -0.0962 | -0.4569 | -0.2547 | -0.0365 | -0.0858 |
| 6          | -2.2813                   | 0.8495  | 0.0000  | -0.0353 | -0.2063 | 0.0258  | 0.1609   | 0.0544  | 0.4011  | 0.0513  | 0.5655  | 0.0880  |
| 7          | -1.1244                   | 1.4677  | 0.0000  | -0.1900 | 0.1625  | -0.1580 | -0.4083  | -0.3468 | -0.6953 | -0.3954 | -1.1191 | -0.4042 |
| 1          | -3.1652                   | 1.4825  | 0.0000  | 0.1140  | 0.1359  | 0.0415  | 0.0739   | 0.1077  | 0.0479  | 0.1860  | 0.0382  | 0.0926  |
| 1          | -3.4255                   | -0.9852 | 0.0000  | 0.1147  | 0.1442  | 0.0455  | 0.1078   | 0.1019  | 0.1819  | 0.2145  | 0.0402  | 0.0904  |
| 1          | -1.3814                   | -2.4162 | 0.0000  | 0.1141  | 0.1481  | 0.0474  | 0.1012   | 0.1041  | 0.1093  | 0.2088  | 0.0394  | 0.0903  |
| 1          | 1.1260                    | -2.5320 | 0.0000  | 0.1055  | 0.1456  | 0.0410  | 0.0959   | 0.0978  | 0.1335  | 0.2044  | 0.0304  | 0.0831  |
| 1          | 3.2943                    | -1.3561 | 0.0000  | 0.1119  | 0.1436  | 0.0426  | 0.0974   | 0.0987  | 0.1411  | 0.2102  | 0.0331  | 0.0869  |
| 1          | 3.3710                    | 1.1168  | 0.0000  | 0.1122  | 0.1442  | 0.0435  | 0.0986   | 0.0996  | 0.1336  | 0.2105  | 0.0343  | 0.0878  |
| 1          | 1.2648                    | 2.4298  | 0.0000  | 0.1029  | 0.1496  | 0.0450  | 0.1182   | 0.1050  | 0.1647  | 0.2220  | 0.0566  | 0.0879  |

Dipole mement (in D) 2.07 (DEN) 1.29 0.48 1.02 1.67 1.92 2.06 2.23 3.87 2.05

-----  
 File TZVPMol034.out  
 Molecule PMol034 isoquinoline  
 SP Mol034 B3LYP/Def2TZVP VAC.  
 0 17

|            |                           |         |         |         |         |         |          |         |         |         |         |         |
|------------|---------------------------|---------|---------|---------|---------|---------|----------|---------|---------|---------|---------|---------|
| Dipole     | 2.3962                    | -0.9822 | 0.0000  | 2.5897  |         |         |          |         |         |         |         |         |
| Quadrupole | -1.3068                   | 5.9393  | -4.6325 | 4.3097  | 0.0000  | 0.0000  |          |         |         |         |         |         |
|            | Atomic coordinates (in A) |         |         | Mul.    | Lowdin  | Hirsch. | I-Hirsch | CM5     | ESP     | NPA     | AIM     | ACP     |
| 6          | 0.0000                    | 0.6968  | 0.0000  | 0.1255  | -0.1029 | -0.0063 | -0.0018  | -0.0085 | -0.2276 | -0.1100 | -0.0149 | 0.0161  |
| 6          | 1.2346                    | 1.3775  | 0.0000  | -0.1656 | -0.0929 | -0.0304 | -0.1099  | -0.0834 | -0.1577 | -0.1631 | -0.0237 | -0.0804 |
| 6          | 2.4106                    | 0.6749  | 0.0000  | -0.1018 | -0.1358 | -0.0375 | -0.1007  | -0.0934 | -0.1345 | -0.2087 | -0.0222 | -0.0830 |
| 6          | 2.3946                    | -0.7339 | 0.0000  | -0.0867 | -0.1279 | -0.0308 | -0.0724  | -0.0866 | -0.0695 | -0.1868 | -0.0219 | -0.0756 |
| 6          | 1.2093                    | -1.4217 | 0.0000  | -0.1952 | -0.0969 | -0.0359 | -0.1424  | -0.0891 | -0.3852 | -0.1840 | -0.0243 | -0.0870 |



|   |         |         |        |         |         |         |         |         |         |         |         |         |
|---|---------|---------|--------|---------|---------|---------|---------|---------|---------|---------|---------|---------|
| 6 | -0.0182 | -0.7251 | 0.0000 | 0.0997  | -0.0899 | 0.0074  | 0.1105  | 0.0019  | 0.5948  | -0.0408 | -0.0021 | 0.0284  |
| 6 | -1.2807 | -1.3532 | 0.0000 | -0.1303 | -0.1132 | -0.0451 | -0.2170 | -0.0927 | -0.6245 | -0.2200 | -0.0354 | -0.0897 |
| 6 | -2.4145 | -0.5869 | 0.0000 | -0.0353 | -0.2071 | 0.0103  | 0.1225  | 0.0300  | 0.3975  | 0.0112  | 0.4430  | 0.0663  |
| 6 | -1.2449 | 1.3668  | 0.0000 | -0.0807 | -0.1681 | 0.0297  | 0.1377  | 0.0611  | 0.3630  | 0.0837  | 0.5687  | 0.0872  |
| 7 | -2.4112 | 0.7688  | 0.0000 | -0.2069 | 0.1276  | -0.1638 | -0.3822 | -0.3572 | -0.6268 | -0.4091 | -1.1244 | -0.4008 |
| 1 | -3.3947 | -1.0512 | 0.0000 | 0.1168  | 0.1360  | 0.0411  | 0.0791  | 0.1069  | 0.0518  | 0.1911  | 0.0405  | 0.0919  |
| 1 | -1.3458 | -2.4347 | 0.0000 | 0.1045  | 0.1472  | 0.0441  | 0.1086  | 0.1012  | 0.1982  | 0.2113  | 0.0370  | 0.0868  |
| 1 | -1.2502 | 2.4558  | 0.0000 | 0.1113  | 0.1394  | 0.0407  | 0.0702  | 0.1074  | 0.0467  | 0.1824  | 0.0364  | 0.0895  |
| 1 | 1.2351  | 2.4614  | 0.0000 | 0.1090  | 0.1484  | 0.0447  | 0.0975  | 0.1015  | 0.1366  | 0.2105  | 0.0372  | 0.0873  |
| 1 | 3.3584  | 1.1974  | 0.0000 | 0.1147  | 0.1443  | 0.0437  | 0.0991  | 0.0998  | 0.1311  | 0.2118  | 0.0356  | 0.0882  |
| 1 | 3.3324  | -1.2750 | 0.0000 | 0.1148  | 0.1450  | 0.0447  | 0.0986  | 0.1008  | 0.1323  | 0.2111  | 0.0360  | 0.0893  |
| 1 | 1.1989  | -2.5051 | 0.0000 | 0.1061  | 0.1470  | 0.0432  | 0.1024  | 0.1000  | 0.1737  | 0.2095  | 0.0345  | 0.0856  |

Dipole mement (in D) 2.59 (DEN) 1.60 0.85 1.49 2.05 2.43 2.57 2.73 4.67 2.54

-----  
File TZVPMol035.out

Molecule PMol035 imidazole

SP Mol035 B3LYP/Def2TZVP VAC.

0 9

Dipole 1.6521 3.3817 0.0001 3.7637

Quadrupole 5.0770 -1.3745 -3.7025 0.7333 0.0000 -0.0001

|   | Atomic coordinates (in A) |         |         | Mul.    | Lowdin  | Hirsch. | I-Hirsch | CM5     | ESP     | NPA     | AIM     | ACP     |
|---|---------------------------|---------|---------|---------|---------|---------|----------|---------|---------|---------|---------|---------|
| 7 | 0.7573                    | 0.7975  | 0.0000  | -0.2294 | 0.1744  | -0.0493 | -0.4175  | -0.4082 | -0.1293 | -0.5060 | -1.2003 | -0.3752 |
| 7 | -0.1405                   | -1.2207 | -0.0000 | -0.2738 | 0.0854  | -0.2074 | -0.4353  | -0.3894 | -0.4848 | -0.4465 | -1.0774 | -0.4312 |
| 6 | -0.6026                   | 0.9837  | -0.0000 | -0.0635 | -0.2489 | -0.0372 | -0.0340  | -0.0169 | -0.2910 | -0.1166 | 0.3182  | 0.0138  |
| 6 | -1.1325                   | -0.2745 | 0.0000  | -0.0954 | -0.2646 | -0.0384 | 0.0167   | -0.0121 | 0.1073  | -0.0960 | 0.3889  | 0.0261  |
| 6 | 0.9803                    | -0.5441 | -0.0000 | 0.0566  | -0.3156 | 0.0354  | 0.2414   | 0.1339  | 0.1452  | 0.1502  | 0.9504  | 0.1838  |
| 1 | 1.4540                    | 1.5211  | 0.0001  | 0.2205  | 0.1855  | 0.1470  | 0.3357   | 0.3417  | 0.2697  | 0.4072  | 0.4220  | 0.2735  |
| 1 | -2.1734                   | -0.5527 | 0.0001  | 0.1188  | 0.1284  | 0.0451  | 0.0970   | 0.1098  | 0.1039  | 0.2038  | 0.0557  | 0.0950  |
| 1 | -1.0445                   | 1.9642  | -0.0001 | 0.1313  | 0.1294  | 0.0508  | 0.1093   | 0.1150  | 0.1800  | 0.2129  | 0.0696  | 0.1027  |
| 1 | 1.9746                    | -0.9611 | -0.0000 | 0.1349  | 0.1259  | 0.0540  | 0.0867   | 0.1264  | 0.0990  | 0.1911  | 0.0728  | 0.1117  |

Dipole mement (in D) 3.76 (DEN) 2.63 2.52 2.36 3.33 3.32 3.76 3.73 3.52 3.04

-----  
File TZVPMol036.out

Molecule PMol036 pyridazine

SP Mol036 B3LYP/Def2TZVP VAC.

0 10

Dipole 0.0000 0.0000 4.2100 4.2100

Quadrupole -1.4334 4.8457 -3.4124 0.0000 0.0000 0.0000

|   | Atomic coordinates (in A) |         |         | Mul.    | Lowdin  | Hirsch. | I-Hirsch | CM5     | ESP     | NPA     | AIM     | ACP     |
|---|---------------------------|---------|---------|---------|---------|---------|----------|---------|---------|---------|---------|---------|
| 6 | 0.0000                    | 1.3165  | -0.0659 | -0.0604 | -0.2187 | 0.0196  | 0.0709   | 0.0510  | 0.4184  | -0.0040 | 0.4852  | 0.0860  |
| 6 | 0.0000                    | 0.6882  | 1.1736  | -0.0834 | -0.1298 | -0.0199 | -0.1107  | -0.0679 | -0.2008 | -0.2092 | -0.0220 | -0.0556 |
| 6 | 0.0000                    | -0.6882 | 1.1736  | -0.0834 | -0.1298 | -0.0199 | -0.1107  | -0.0679 | -0.2008 | -0.2092 | -0.0220 | -0.0556 |
| 6 | 0.0000                    | -1.3165 | -0.0659 | -0.0604 | -0.2187 | 0.0196  | 0.0709   | 0.0510  | 0.4184  | -0.0040 | 0.4851  | 0.0860  |
| 7 | 0.0000                    | 0.6657  | -1.2268 | -0.1079 | 0.0597  | -0.1066 | -0.1652  | -0.2135 | -0.3304 | -0.2050 | -0.5757 | -0.2364 |

|   |        |         |         |         |        |         |         |         |         |         |         |         |
|---|--------|---------|---------|---------|--------|---------|---------|---------|---------|---------|---------|---------|
| 7 | 0.0000 | -0.6657 | -1.2268 | -0.1079 | 0.0597 | -0.1066 | -0.1652 | -0.2135 | -0.3304 | -0.2050 | -0.5758 | -0.2364 |
| 1 | 0.0000 | -2.3974 | -0.1488 | 0.1258  | 0.1406 | 0.0510  | 0.0897  | 0.1182  | -0.0210 | 0.1990  | 0.0570  | 0.1039  |
| 1 | 0.0000 | -1.2641 | 2.0901  | 0.1259  | 0.1482 | 0.0558  | 0.1153  | 0.1122  | 0.1338  | 0.2191  | 0.0557  | 0.1020  |
| 1 | 0.0000 | 1.2641  | 2.0901  | 0.1259  | 0.1482 | 0.0558  | 0.1153  | 0.1122  | 0.1338  | 0.2191  | 0.0557  | 0.1020  |
| 1 | 0.0000 | 2.3974  | -0.1488 | 0.1258  | 0.1406 | 0.0510  | 0.0897  | 0.1182  | -0.0210 | 0.1990  | 0.0570  | 0.1039  |

Dipole moment (in D) 4.21 (DEN) 2.72 0.75 2.07 2.84 3.80 4.08 4.18 7.27 4.01

-----  
File TZVPMol037.out

Molecule PMol037 pyrimidine

SP Mol037 B3LYP/Def2TZVP VAC.

0 10

Dipole 0.0000 0.0000 2.3432 2.3432  
 Quadrupole -1.1907 -2.5624 3.7531 0.0000 0.0000 0.0000

|   | Atomic coordinates (in A) |         |         | Mul.    | Lowdin  | Hirsch. | I-Hirsch | CM5     | ESP     | NPA     | AIM     | ACP     |
|---|---------------------------|---------|---------|---------|---------|---------|----------|---------|---------|---------|---------|---------|
| 7 | 0.0000                    | 1.1930  | -0.7124 | -0.2219 | 0.1201  | -0.1614 | -0.4307  | -0.3505 | -0.7896 | -0.4344 | -1.1138 | -0.3901 |
| 7 | 0.0000                    | -1.1930 | -0.7124 | -0.2219 | 0.1201  | -0.1614 | -0.4307  | -0.3505 | -0.7896 | -0.4344 | -1.1138 | -0.3901 |
| 6 | 0.0000                    | 1.1781  | 0.6194  | -0.0114 | -0.1845 | 0.0416  | 0.1949   | 0.0684  | 0.6414  | 0.0657  | 0.5096  | 0.1033  |
| 6 | 0.0000                    | 0.0000  | 1.3477  | -0.1162 | -0.1569 | -0.0451 | -0.2502  | -0.0894 | -0.7235 | -0.2915 | -0.0386 | -0.0789 |
| 6 | 0.0000                    | -1.1781 | 0.6194  | -0.0114 | -0.1845 | 0.0416  | 0.1949   | 0.0684  | 0.6414  | 0.0657  | 0.5099  | 0.1033  |
| 6 | 0.0000                    | 0.0000  | -1.3028 | 0.0716  | -0.2725 | 0.0829  | 0.3602   | 0.1871  | 0.8133  | 0.2449  | 1.0258  | 0.2421  |
| 1 | 0.0000                    | -2.1443 | 1.1158  | 0.1299  | 0.1395  | 0.0510  | 0.0862   | 0.1168  | 0.0076  | 0.1933  | 0.0534  | 0.1030  |
| 1 | 0.0000                    | 0.0000  | 2.4291  | 0.1212  | 0.1465  | 0.0523  | 0.1226   | 0.1091  | 0.2168  | 0.2208  | 0.0529  | 0.0983  |
| 1 | 0.0000                    | 2.1443  | 1.1158  | 0.1299  | 0.1395  | 0.0510  | 0.0862   | 0.1168  | 0.0076  | 0.1933  | 0.0534  | 0.1030  |
| 1 | 0.0000                    | 0.0000  | -2.3889 | 0.1300  | 0.1330  | 0.0476  | 0.0666   | 0.1239  | -0.0253 | 0.1767  | 0.0611  | 0.1061  |

Dipole moment (in D) 2.34 (DEN) 1.57 0.45 1.15 1.82 2.16 2.35 2.56 4.48 2.29

-----  
File TZVPMol038.out

Molecule PMol038 2-methylpyrimidine

SP Mol038 B3LYP/Def2TZVP VAC.

0 13

Dipole 1.6491 -0.0591 0.0000 1.6502  
 Quadrupole 5.6989 -3.7422 -1.9567 0.0362 0.0000 0.0000

|   | Atomic coordinates (in A) |         |         | Mul.    | Lowdin  | Hirsch. | I-Hirsch | CM5     | ESP     | NPA     | AIM     | ACP     |
|---|---------------------------|---------|---------|---------|---------|---------|----------|---------|---------|---------|---------|---------|
| 7 | -0.2207                   | 1.1953  | 0.0000  | -0.2349 | 0.1401  | -0.1635 | -0.4660  | -0.3493 | -0.8375 | -0.4467 | -1.1138 | -0.4011 |
| 6 | -0.8403                   | 0.0098  | 0.0000  | 0.2136  | -0.3092 | 0.1224  | 0.5927   | 0.2610  | 1.1261  | 0.4057  | 0.9854  | 0.3512  |
| 6 | 1.1106                    | 1.1703  | -0.0000 | -0.0143 | -0.1855 | 0.0381  | 0.2003   | 0.0652  | 0.5951  | 0.0732  | 0.5094  | 0.1006  |
| 7 | -0.2342                   | -1.1857 | 0.0000  | -0.2374 | 0.1429  | -0.1641 | -0.4660  | -0.3501 | -0.8379 | -0.4452 | -1.1174 | -0.4015 |
| 6 | 1.8347                    | -0.0081 | -0.0000 | -0.1187 | -0.1646 | -0.0531 | -0.2668  | -0.0974 | -0.7210 | -0.3053 | -0.0428 | -0.0869 |
| 6 | 1.0938                    | -1.1791 | -0.0000 | -0.0219 | -0.1863 | 0.0391  | 0.2029   | 0.0669  | 0.5971  | 0.0753  | 0.5203  | 0.1020  |
| 6 | -2.3300                   | 0.0064  | -0.0000 | -0.3144 | -0.2528 | -0.0890 | -0.5038  | -0.2227 | -0.6737 | -0.6342 | 0.0191  | -0.2394 |
| 1 | 1.6105                    | 2.1352  | -0.0000 | 0.1252  | 0.1387  | 0.0488  | 0.0847   | 0.1147  | 0.0196  | 0.1916  | 0.0496  | 0.1005  |
| 1 | 2.9155                    | -0.0155 | -0.0000 | 0.1184  | 0.1452  | 0.0500  | 0.1215   | 0.1068  | 0.2170  | 0.2201  | 0.0497  | 0.0957  |
| 1 | 1.5822                    | -2.1500 | -0.0000 | 0.1247  | 0.1386  | 0.0488  | 0.0842   | 0.1147  | 0.0195  | 0.1911  | 0.0492  | 0.1005  |
| 1 | -2.7211                   | 1.0185  | -0.0001 | 0.1236  | 0.1273  | 0.0375  | 0.1374   | 0.0947  | 0.1644  | 0.2229  | 0.0319  | 0.0910  |

|   |         |         |         |        |        |        |        |        |        |        |        |        |
|---|---------|---------|---------|--------|--------|--------|--------|--------|--------|--------|--------|--------|
| 1 | -2.7077 | -0.5259 | 0.8720  | 0.1181 | 0.1329 | 0.0426 | 0.1395 | 0.0979 | 0.1657 | 0.2258 | 0.0293 | 0.0937 |
| 1 | -2.7077 | -0.5261 | -0.8719 | 0.1181 | 0.1328 | 0.0426 | 0.1395 | 0.0979 | 0.1657 | 0.2258 | 0.0293 | 0.0937 |

Dipole mement (in D) 1.65 (DEN) 0.82 0.62 0.65 1.62 1.52 1.66 1.77 3.60 1.70

-----  
File TZVPMol039.out

Molecule PMol039 hydrogen\_cyanide

SP Mol039 B3LYP/Def2TZVP VAC.

0 3

Dipole 0.0000 0.0000 -3.0304 3.0304

Quadrupole -0.6611 -0.6611 1.3222 0.0000 0.0000 0.0000

|  |                           |  |  |      |        |         |          |     |     |     |     |     |
|--|---------------------------|--|--|------|--------|---------|----------|-----|-----|-----|-----|-----|
|  | Atomic coordinates (in A) |  |  | Mul. | Lowdin | Hirsch. | I-Hirsch | CM5 | ESP | NPA | AIM | ACP |
|--|---------------------------|--|--|------|--------|---------|----------|-----|-----|-----|-----|-----|

|   |        |        |         |         |         |         |         |         |         |         |         |         |
|---|--------|--------|---------|---------|---------|---------|---------|---------|---------|---------|---------|---------|
| 1 | 0.0000 | 0.0000 | -1.5660 | 0.1901  | 0.1243  | 0.1269  | 0.2104  | 0.1867  | 0.2160  | 0.2247  | 0.2143  | 0.1841  |
| 6 | 0.0000 | 0.0000 | -0.4989 | -0.1741 | -0.1723 | 0.0549  | 0.0771  | 0.1240  | 0.1252  | 0.0761  | 0.9354  | 0.1460  |
| 7 | 0.0000 | 0.0000 | 0.6514  | -0.0159 | 0.0480  | -0.1818 | -0.2874 | -0.3107 | -0.3412 | -0.3008 | -1.1497 | -0.3302 |

Dipole mement (in D) 3.03 (DEN) 1.06 0.37 1.65 2.67 2.67 2.99 2.81 7.45 2.77

-----  
File TZVPMol040.out

Molecule PMol040 acetonitrile

SP Mol040 B3LYP/Def2TZVP VAC.

0 6

Dipole 0.0000 -4.0096 0.0000 4.0096

Quadrupole 1.0690 -2.1379 1.0689 0.0000 0.0000 0.0000

|  |                           |  |  |      |        |         |          |     |     |     |     |     |
|--|---------------------------|--|--|------|--------|---------|----------|-----|-----|-----|-----|-----|
|  | Atomic coordinates (in A) |  |  | Mul. | Lowdin | Hirsch. | I-Hirsch | CM5 | ESP | NPA | AIM | ACP |
|--|---------------------------|--|--|------|--------|---------|----------|-----|-----|-----|-----|-----|

|   |         |         |         |         |         |         |         |         |         |         |         |         |
|---|---------|---------|---------|---------|---------|---------|---------|---------|---------|---------|---------|---------|
| 6 | 0.0000  | 0.2752  | 0.0000  | -0.1966 | -0.2314 | 0.0729  | 0.3793  | 0.1793  | 0.4522  | 0.2782  | 0.9117  | 0.2372  |
| 6 | 0.0000  | -1.1678 | 0.0000  | -0.2579 | -0.2660 | -0.0410 | -0.4371 | -0.1817 | -0.4726 | -0.7040 | 0.0832  | -0.2038 |
| 1 | 1.0189  | -1.5496 | 0.0000  | 0.1532  | 0.1490  | 0.0658  | 0.1603  | 0.1187  | 0.1718  | 0.2491  | 0.0674  | 0.1179  |
| 1 | -0.5094 | -1.5496 | 0.8824  | 0.1532  | 0.1490  | 0.0658  | 0.1603  | 0.1187  | 0.1730  | 0.2491  | 0.0674  | 0.1179  |
| 1 | -0.5094 | -1.5496 | -0.8824 | 0.1532  | 0.1490  | 0.0658  | 0.1603  | 0.1187  | 0.1730  | 0.2491  | 0.0674  | 0.1179  |
| 7 | -0.0000 | 1.4292  | 0.0000  | -0.0052 | 0.0505  | -0.2292 | -0.4231 | -0.3538 | -0.4974 | -0.3214 | -1.1969 | -0.3872 |

Dipole mement (in D) 4.01 (DEN) 2.27 1.79 2.72 3.53 3.82 4.02 3.45 8.98 3.84

-----  
File TZVPMol041.out

Molecule PMol041 malonic\_dinitrile

SP Mol041 B3LYP/Def2TZVP VAC.

0 7

Dipole 0.0002 3.8336 0.0000 3.8336

Quadrupole 5.3096 5.2938 -10.6034 0.0000 0.0000 0.0000

|  |                           |  |  |      |        |         |          |     |     |     |     |     |
|--|---------------------------|--|--|------|--------|---------|----------|-----|-----|-----|-----|-----|
|  | Atomic coordinates (in A) |  |  | Mul. | Lowdin | Hirsch. | I-Hirsch | CM5 | ESP | NPA | AIM | ACP |
|--|---------------------------|--|--|------|--------|---------|----------|-----|-----|-----|-----|-----|

|   |         |        |        |         |         |        |         |         |         |         |        |         |
|---|---------|--------|--------|---------|---------|--------|---------|---------|---------|---------|--------|---------|
| 1 | -0.8748 | 1.4769 | 0.0000 | 0.1778  | 0.1906  | 0.0900 | 0.1820  | 0.1475  | 0.1834  | 0.2855  | 0.1148 | 0.1370  |
| 6 | 0.0000  | 0.8222 | 0.0000 | -0.0200 | -0.2050 | 0.0264 | -0.3284 | -0.0620 | -0.3322 | -0.5893 | 0.1765 | -0.0614 |
| 1 | 0.8750  | 1.4768 | 0.0000 | 0.1778  | 0.1906  | 0.0900 | 0.1820  | 0.1475  | 0.1840  | 0.2855  | 0.1148 | 0.1370  |
| 6 | -0.0000 | 0.0245 | 1.2160 | -0.2007 | -0.1792 | 0.0850 | 0.3426  | 0.1963  | 0.4218  | 0.2741  | 0.9355 | 0.2385  |

|   |         |         |         |         |         |         |         |         |         |         |         |         |
|---|---------|---------|---------|---------|---------|---------|---------|---------|---------|---------|---------|---------|
| 6 | -0.0000 | 0.0245  | -1.2160 | -0.2007 | -0.1792 | 0.0850  | 0.3426  | 0.1963  | 0.4218  | 0.2741  | 0.9355  | 0.2385  |
| 7 | -0.0000 | -0.5844 | 2.1945  | 0.0329  | 0.0911  | -0.1882 | -0.3604 | -0.3127 | -0.4394 | -0.2650 | -1.1385 | -0.3448 |
| 7 | -0.0000 | -0.5844 | -2.1945 | 0.0329  | 0.0911  | -0.1882 | -0.3604 | -0.3127 | -0.4394 | -0.2650 | -1.1385 | -0.3448 |

Dipole mement (in D) 3.83 (DEN) 2.21 1.34 2.46 3.39 3.65 3.86 3.28 8.94 3.69

-----  
 File TZVPMol042.out  
 Molecule PMol042 propionitrile  
 SP Mol042 B3LYP/Def2TZVP VAC.  
 0 9

|            |                           |         |         |         |         |         |          |         |         |         |         |         |
|------------|---------------------------|---------|---------|---------|---------|---------|----------|---------|---------|---------|---------|---------|
| Dipole     | -2.3256                   | 3.3919  | 0.0000  | 4.1126  |         |         |          |         |         |         |         |         |
| Quadrupole | -0.9849                   | -1.4310 | 2.4159  | 3.8480  | 0.0000  | 0.0000  |          |         |         |         |         |         |
|            | Atomic coordinates (in A) |         |         | Mul.    | Lowdin  | Hirsch. | I-Hirsch | CM5     | ESP     | NPA     | AIM     | ACP     |
| 6          | 0.7651                    | -0.4290 | 0.0000  | -0.2164 | -0.2051 | 0.0712  | 0.3542   | 0.1794  | 0.2718  | 0.2813  | 0.9007  | 0.2336  |
| 6          | 0.0000                    | 0.8032  | 0.0000  | -0.0919 | -0.2637 | -0.0118 | -0.2217  | -0.1137 | 0.1021  | -0.4974 | 0.1166  | -0.1001 |
| 7          | 1.3581                    | -1.4196 | 0.0000  | -0.0029 | 0.0511  | -0.2317 | -0.4258  | -0.3564 | -0.4595 | -0.3256 | -1.2032 | -0.3901 |
| 6          | -1.5051                   | 0.5655  | 0.0000  | -0.3258 | -0.2785 | -0.0686 | -0.3321  | -0.2191 | -0.1687 | -0.5724 | 0.0283  | -0.2382 |
| 1          | 0.3001                    | 1.3879  | 0.8717  | 0.1327  | 0.1608  | 0.0587  | 0.1329   | 0.1148  | 0.0365  | 0.2406  | 0.0505  | 0.1074  |
| 1          | 0.3001                    | 1.3879  | -0.8717 | 0.1327  | 0.1608  | 0.0587  | 0.1329   | 0.1148  | 0.0365  | 0.2406  | 0.0505  | 0.1074  |
| 1          | -2.0362                   | 1.5143  | 0.0000  | 0.1225  | 0.1228  | 0.0406  | 0.1189   | 0.0923  | 0.0514  | 0.2096  | 0.0142  | 0.0952  |
| 1          | -1.8152                   | 0.0043  | 0.8784  | 0.1246  | 0.1259  | 0.0415  | 0.1203   | 0.0939  | 0.0649  | 0.2117  | 0.0213  | 0.0925  |
| 1          | -1.8152                   | 0.0043  | -0.8784 | 0.1246  | 0.1259  | 0.0415  | 0.1203   | 0.0939  | 0.0649  | 0.2117  | 0.0213  | 0.0925  |

Dipole mement (in D) 4.11 (DEN) 2.38 1.90 2.85 3.63 3.96 4.09 3.53 9.20 3.94

-----  
 File TZVPMol043.out  
 Molecule PMol043 butanenitrile(anti)  
 SP Mol043 B3LYP/Def2TZVP VAC.  
 0 12

|            |                           |         |         |         |         |         |          |         |         |         |         |         |
|------------|---------------------------|---------|---------|---------|---------|---------|----------|---------|---------|---------|---------|---------|
| Dipole     | 3.3353                    | 2.3214  | 0.4854  | 4.0925  |         |         |          |         |         |         |         |         |
| Quadrupole | -5.3538                   | 2.4997  | 2.8541  | -3.5772 | -0.8780 | 0.1059  |          |         |         |         |         |         |
|            | Atomic coordinates (in A) |         |         | Mul.    | Lowdin  | Hirsch. | I-Hirsch | CM5     | ESP     | NPA     | AIM     | ACP     |
| 6          | -1.2838                   | 0.0512  | 0.0468  | -0.2337 | -0.2049 | 0.0728  | 0.3606   | 0.1806  | 0.3544  | 0.2821  | 0.8980  | 0.2357  |
| 7          | -2.1491                   | -0.6904 | -0.1411 | -0.0009 | 0.0497  | -0.2316 | -0.4281  | -0.3570 | -0.4797 | -0.3295 | -1.2059 | -0.3886 |
| 6          | -0.1753                   | 0.9615  | 0.2638  | -0.0942 | -0.2404 | -0.0153 | -0.2593  | -0.1157 | -0.2053 | -0.5004 | 0.1076  | -0.1063 |
| 6          | 1.1233                    | 0.4749  | -0.3844 | -0.1504 | -0.2710 | -0.0333 | -0.1161  | -0.1448 | 0.2398  | -0.3661 | 0.0632  | -0.1286 |
| 1          | -0.4588                   | 1.9432  | -0.1193 | 0.1358  | 0.1615  | 0.0583  | 0.1310   | 0.1145  | 0.0890  | 0.2450  | 0.0498  | 0.1070  |
| 1          | -0.0407                   | 1.0799  | 1.3419  | 0.1303  | 0.1622  | 0.0565  | 0.1321   | 0.1131  | 0.1019  | 0.2378  | 0.0468  | 0.1041  |
| 6          | 1.5926                    | -0.8578 | 0.1627  | -0.3527 | -0.3009 | -0.0823 | -0.3486  | -0.2333 | -0.2882 | -0.5973 | 0.0108  | -0.2497 |
| 1          | 0.9773                    | 0.4102  | -1.4638 | 0.1055  | 0.1401  | 0.0372  | 0.0986   | 0.0929  | -0.0133 | 0.2037  | 0.0078  | 0.0849  |
| 1          | 1.8822                    | 1.2421  | -0.2254 | 0.1030  | 0.1366  | 0.0366  | 0.0978   | 0.0915  | -0.0250 | 0.2024  | 0.0017  | 0.0876  |
| 1          | 2.5192                    | -1.1767 | -0.3100 | 0.1172  | 0.1208  | 0.0357  | 0.1115   | 0.0872  | 0.0686  | 0.2114  | 0.0059  | 0.0896  |
| 1          | 1.7728                    | -0.8059 | 1.2369  | 0.1034  | 0.1192  | 0.0310  | 0.1056   | 0.0830  | 0.0690  | 0.1977  | -0.0041 | 0.0827  |
| 1          | 0.8512                    | -1.6388 | -0.0059 | 0.1368  | 0.1270  | 0.0342  | 0.1149   | 0.0877  | 0.0887  | 0.2132  | 0.0179  | 0.0815  |

Dipole mement (in D) 4.09 (DEN) 2.35 1.81 2.81 3.66 3.93 4.06 3.49 9.15 3.92

-----  
File TZVPMol044.out

Molecule PMol044 butanenitrile(gauche)

SP Mol044 B3LYP/Def2TZVP VAC.

0 12

Dipole 4.2455 0.0200 0.0000 4.2455

Quadrupole -8.6090 4.4112 4.1977 1.0326 0.0000 0.0000

|   | Atomic coordinates (in A) |         |         | Mul.    | Lowdin  | Hirsch. | I-Hirsch | CM5     | ESP     | NPA     | AIM     | ACP     |
|---|---------------------------|---------|---------|---------|---------|---------|----------|---------|---------|---------|---------|---------|
| 6 | -1.4442                   | 0.5081  | 0.0000  | -0.2192 | -0.2034 | 0.0706  | 0.3522   | 0.1788  | 0.3164  | 0.2855  | 0.8994  | 0.2336  |
| 7 | -2.5930                   | 0.3918  | 0.0000  | 0.0052  | 0.0507  | -0.2329 | -0.4283  | -0.3575 | -0.4705 | -0.3263 | -1.2044 | -0.3913 |
| 6 | 0.0000                    | 0.6241  | 0.0000  | -0.1087 | -0.2392 | -0.0156 | -0.2580  | -0.1157 | -0.1470 | -0.4991 | 0.1080  | -0.1064 |
| 6 | 0.7131                    | -0.7289 | 0.0000  | -0.1632 | -0.2695 | -0.0332 | -0.1222  | -0.1449 | 0.2387  | -0.3671 | 0.0639  | -0.1292 |
| 1 | 0.2992                    | 1.2108  | 0.8723  | 0.1295  | 0.1617  | 0.0565  | 0.1324   | 0.1132  | 0.0872  | 0.2383  | 0.0470  | 0.1037  |
| 1 | 0.2992                    | 1.2108  | -0.8723 | 0.1295  | 0.1617  | 0.0565  | 0.1324   | 0.1132  | 0.0872  | 0.2383  | 0.0470  | 0.1037  |
| 6 | 2.2190                    | -0.5679 | 0.0000  | -0.3295 | -0.3032 | -0.0791 | -0.3309  | -0.2309 | -0.3283 | -0.5899 | 0.0137  | -0.2448 |
| 1 | 0.3893                    | -1.3013 | 0.8705  | 0.1081  | 0.1400  | 0.0378  | 0.0999   | 0.0936  | -0.0138 | 0.2046  | 0.0094  | 0.0850  |
| 1 | 0.3893                    | -1.3013 | -0.8705 | 0.1081  | 0.1400  | 0.0378  | 0.0999   | 0.0936  | -0.0138 | 0.2046  | 0.0094  | 0.0850  |
| 1 | 2.7219                    | -1.5328 | 0.0000  | 0.1237  | 0.1226  | 0.0375  | 0.1124   | 0.0890  | 0.0869  | 0.2134  | 0.0098  | 0.0916  |
| 1 | 2.5626                    | -0.0205 | -0.8783 | 0.1083  | 0.1193  | 0.0320  | 0.1052   | 0.0838  | 0.0785  | 0.1989  | -0.0019 | 0.0846  |
| 1 | 2.5626                    | -0.0205 | 0.8783  | 0.1083  | 0.1193  | 0.0320  | 0.1052   | 0.0838  | 0.0785  | 0.1989  | -0.0019 | 0.0846  |

Dipole moment (in D) 4.25 (DEN) 2.45 2.16 3.04 3.76 4.16 4.25 3.67 9.39 4.10

-----  
File TZVPMol045.out

Molecule PMol045 cyclopropane\_carbonitril

SP Mol045 B3LYP/Def2TZVP VAC.

0 10

Dipole -4.2883 -0.0007 0.9101 4.3838

Quadrupole -6.2519 2.4803 3.7716 -0.0014 0.5777 -0.0003

|   | Atomic coordinates (in A) |         |         | Mul.    | Lowdin  | Hirsch. | I-Hirsch | CM5     | ESP     | NPA     | AIM     | ACP     |
|---|---------------------------|---------|---------|---------|---------|---------|----------|---------|---------|---------|---------|---------|
| 6 | -1.2546                   | 0.7419  | -0.2246 | -0.1989 | -0.1838 | -0.0465 | -0.2212  | -0.1531 | -0.2465 | -0.3717 | -0.0174 | -0.1555 |
| 6 | -0.2127                   | -0.0003 | 0.5766  | 0.0092  | -0.2071 | -0.0093 | -0.1220  | -0.0664 | -0.1675 | -0.3456 | 0.0466  | -0.0369 |
| 6 | -1.2549                   | -0.7415 | -0.2251 | -0.1989 | -0.1838 | -0.0465 | -0.2212  | -0.1531 | -0.2458 | -0.3717 | -0.0172 | -0.1555 |
| 1 | -2.0137                   | 1.2651  | 0.3372  | 0.1220  | 0.1337  | 0.0503  | 0.1273   | 0.1054  | 0.1402  | 0.2188  | 0.0454  | 0.1022  |
| 1 | -0.3272                   | -0.0006 | 1.6519  | 0.1322  | 0.1653  | 0.0621  | 0.1333   | 0.1213  | 0.1645  | 0.2491  | 0.0716  | 0.1083  |
| 1 | -2.0141                   | -1.2648 | 0.3365  | 0.1220  | 0.1337  | 0.0503  | 0.1272   | 0.1054  | 0.1402  | 0.2188  | 0.0453  | 0.1022  |
| 1 | -0.9173                   | 1.2546  | -1.1127 | 0.1319  | 0.1391  | 0.0529  | 0.1323   | 0.1091  | 0.1581  | 0.2249  | 0.0561  | 0.1010  |
| 6 | 1.1422                    | -0.0005 | 0.1320  | -0.2510 | -0.1894 | 0.0673  | 0.3397   | 0.1792  | 0.3734  | 0.2776  | 0.9082  | 0.2258  |
| 1 | -0.9178                   | -1.2538 | -1.1135 | 0.1319  | 0.1391  | 0.0529  | 0.1323   | 0.1091  | 0.1575  | 0.2249  | 0.0561  | 0.1010  |
| 7 | 2.2386                    | 0.0003  | -0.2361 | -0.0004 | 0.0532  | -0.2335 | -0.4277  | -0.3570 | -0.4742 | -0.3252 | -1.1951 | -0.3925 |

Dipole moment (in D) 4.38 (DEN) 2.74 2.11 3.14 3.89 4.21 4.37 3.81 9.45 4.21

-----  
File TZVPMol046.out

Molecule PMol046 isobutyronitrile

SP Mol046 B3LYP/Def2TZVP VAC.

0 12

|                      |                           |         |         |         |         |         |          |         |         |         |         |         |
|----------------------|---------------------------|---------|---------|---------|---------|---------|----------|---------|---------|---------|---------|---------|
| Dipole               | 1.1966                    | 3.9593  | 0.0000  | 4.1362  |         |         |          |         |         |         |         |         |
| Quadrupole           | 2.8197                    | -6.1359 | 3.3162  | -1.8056 | 0.0000  | 0.0000  |          |         |         |         |         |         |
|                      | Atomic coordinates (in A) |         |         | Mul.    | Lowdin  | Hirsch. | I-Hirsch | CM5     | ESP     | NPA     | AIM     | ACP     |
| 1                    | 1.5291                    | 0.2625  | 0.0000  | 0.1011  | 0.1732  | 0.0536  | 0.1108   | 0.1133  | 0.0036  | 0.2314  | 0.0383  | 0.0992  |
| 6                    | 0.4354                    | 0.3047  | 0.0000  | 0.0653  | -0.2915 | 0.0165  | 0.0134   | -0.0475 | 0.3642  | -0.3162 | 0.1402  | 0.0048  |
| 6                    | -0.0249                   | -1.0784 | 0.0000  | -0.2384 | -0.1806 | 0.0710  | 0.3343   | 0.1812  | 0.2246  | 0.2854  | 0.8943  | 0.2318  |
| 7                    | -0.4047                   | -2.1692 | 0.0000  | 0.0040  | 0.0526  | -0.2333 | -0.4269  | -0.3580 | -0.4522 | -0.3282 | -1.2077 | -0.3921 |
| 6                    | -0.0249                   | 1.0240  | 1.2665  | -0.3324 | -0.2551 | -0.0723 | -0.3728  | -0.2210 | -0.3933 | -0.5697 | 0.0205  | -0.2440 |
| 6                    | -0.0249                   | 1.0240  | -1.2665 | -0.3324 | -0.2551 | -0.0723 | -0.3728  | -0.2210 | -0.3933 | -0.5697 | 0.0202  | -0.2440 |
| 1                    | -1.1117                   | 1.0804  | 1.3063  | 0.1190  | 0.1270  | 0.0392  | 0.1200   | 0.0923  | 0.1155  | 0.2094  | 0.0168  | 0.0891  |
| 1                    | 0.3648                    | 2.0403  | 1.2782  | 0.1182  | 0.1241  | 0.0384  | 0.1186   | 0.0907  | 0.1030  | 0.2075  | 0.0099  | 0.0916  |
| 1                    | 0.3169                    | 0.5172  | 2.1659  | 0.1292  | 0.1271  | 0.0408  | 0.1183   | 0.0934  | 0.1048  | 0.2166  | 0.0203  | 0.0914  |
| 1                    | -1.1117                   | 1.0804  | -1.3063 | 0.1190  | 0.1270  | 0.0392  | 0.1200   | 0.0923  | 0.1155  | 0.2094  | 0.0168  | 0.0891  |
| 1                    | 0.3648                    | 2.0403  | -1.2782 | 0.1182  | 0.1241  | 0.0384  | 0.1186   | 0.0907  | 0.1030  | 0.2075  | 0.0099  | 0.0916  |
| 1                    | 0.3169                    | 0.5172  | -2.1659 | 0.1292  | 0.1271  | 0.0408  | 0.1183   | 0.0934  | 0.1048  | 0.2166  | 0.0203  | 0.0914  |
| Dipole mement (in D) | 4.14 (DEN)                |         | 2.40    | 2.06    | 2.90    | 3.58    | 4.04     | 4.13    | 3.60    | 9.28    | 3.97    |         |

-----  
File TZVPMol047.out

Molecule PMol047 cyclobutane\_carbonitrile

SP Mol047 B3LYP/Def2TZVP VAC.

0 13

|                      |                           |         |         |         |         |         |          |         |         |         |         |         |
|----------------------|---------------------------|---------|---------|---------|---------|---------|----------|---------|---------|---------|---------|---------|
| Dipole               | -3.0052                   | -3.1534 | 0.0000  | 4.3560  |         |         |          |         |         |         |         |         |
| Quadrupole           | -0.3912                   | -3.5239 | 3.9151  | -6.8190 | 0.0000  | 0.0000  |          |         |         |         |         |         |
|                      | Atomic coordinates (in A) |         |         | Mul.    | Lowdin  | Hirsch. | I-Hirsch | CM5     | ESP     | NPA     | AIM     | ACP     |
| 6                    | 0.7308                    | 1.3613  | 0.0000  | -0.2702 | -0.1854 | 0.0659  | 0.3196   | 0.1774  | 0.2020  | 0.2863  | 0.8901  | 0.2246  |
| 7                    | 1.6056                    | 2.1166  | 0.0000  | 0.0113  | 0.0532  | -0.2332 | -0.4253  | -0.3570 | -0.4359 | -0.3256 | -1.2026 | -0.3920 |
| 6                    | -0.3356                   | 0.3896  | 0.0000  | 0.0468  | -0.2182 | 0.0068  | -0.0701  | -0.0505 | 0.1521  | -0.3283 | 0.1034  | -0.0164 |
| 6                    | -0.3356                   | -0.7259 | 1.0700  | -0.1859 | -0.1893 | -0.0368 | -0.1778  | -0.1429 | -0.1355 | -0.3564 | 0.0305  | -0.1426 |
| 6                    | -0.3356                   | -0.7259 | -1.0700 | -0.1859 | -0.1893 | -0.0368 | -0.1778  | -0.1429 | -0.1355 | -0.3564 | 0.0304  | -0.1426 |
| 1                    | 0.6834                    | -0.9841 | 1.3533  | 0.1079  | 0.1410  | 0.0408  | 0.1039   | 0.0974  | 0.0861  | 0.2081  | 0.0202  | 0.0864  |
| 1                    | 0.6834                    | -0.9841 | -1.3533 | 0.1079  | 0.1410  | 0.0408  | 0.1039   | 0.0974  | 0.0861  | 0.2081  | 0.0202  | 0.0864  |
| 1                    | -0.9147                   | -0.5513 | 1.9742  | 0.1077  | 0.1249  | 0.0369  | 0.0944   | 0.0908  | 0.0427  | 0.2073  | 0.0130  | 0.0871  |
| 1                    | -0.9147                   | -0.5513 | -1.9742 | 0.1077  | 0.1249  | 0.0369  | 0.0944   | 0.0908  | 0.0427  | 0.2073  | 0.0130  | 0.0871  |
| 1                    | -1.2933                   | 0.9130  | 0.0000  | 0.1073  | 0.1725  | 0.0549  | 0.1137   | 0.1152  | 0.0577  | 0.2342  | 0.0448  | 0.0989  |
| 6                    | -0.8864                   | -1.6764 | 0.0000  | -0.1512 | -0.2323 | -0.0451 | -0.1649  | -0.1535 | -0.0408 | -0.3898 | 0.0266  | -0.1464 |
| 1                    | -1.9759                   | -1.6897 | 0.0000  | 0.0938  | 0.1336  | 0.0342  | 0.0932   | 0.0895  | 0.0456  | 0.1983  | 0.0022  | 0.0836  |
| 1                    | -0.5326                   | -2.7047 | 0.0000  | 0.1028  | 0.1233  | 0.0346  | 0.0927   | 0.0883  | 0.0327  | 0.2067  | 0.0079  | 0.0857  |
| Dipole mement (in D) | 4.36 (DEN)                |         | 2.87    | 2.13    | 3.16    | 3.88    | 4.24     | 4.32    | 3.72    | 9.65    | 4.22    |         |

-----  
File TZVPMol048.out

Molecule PMol048 t-butyl\_cyanide

SP Mol048 B3LYP/Def2TZVP VAC.

```

0 15
Dipole      -4.1313  -0.0001  0.0000  4.1313
Quadrupole  -7.3510  3.6757  3.6753 -0.0002  0.0000  0.0000
  Atomic coordinates (in A)      Mul.      Lowdin      Hirsch.      I-Hirsch      CM5      ESP      NPA      AIM      ACP
6      1.1904  -0.0000  0.0000  -0.2638  -0.1596  0.0718  0.3239  0.1842  0.2481  0.2912  0.8917  0.2313
7      2.3456  0.0000  0.0000  0.0145  0.0541  -0.2349  -0.4203  -0.3598  -0.4708  -0.3305  -1.2120  -0.3940
6     -0.2750  0.0000  0.0000  0.1691  -0.3462  0.0442  0.2187  0.0177  0.5295  -0.1563  0.1533  0.1107
6     -0.7673  1.4507  0.0000  -0.3389  -0.2325  -0.0748  -0.4119  -0.2215  -0.4719  -0.5690  0.0158  -0.2487
6     -0.7673  -0.7254  1.2564  -0.3389  -0.2325  -0.0748  -0.4118  -0.2214  -0.4664  -0.5690  0.0160  -0.2486
6     -0.7673  -0.7254  -1.2564  -0.3389  -0.2325  -0.0748  -0.4118  -0.2214  -0.4664  -0.5690  0.0163  -0.2486
1     -1.8570  1.4650  0.0000  0.1163  0.1262  0.0369  0.1244  0.0899  0.1225  0.2058  0.0071  0.0888
1     -1.8570  -0.7324  1.2689  0.1164  0.1262  0.0369  0.1244  0.0899  0.1214  0.2058  0.0071  0.0888
1     -1.8570  -0.7324  -1.2689  0.1164  0.1262  0.0369  0.1244  0.0899  0.1214  0.2058  0.0071  0.0888
1     -0.4214  1.9885  -0.8810  0.1247  0.1284  0.0388  0.1234  0.0921  0.1231  0.2142  0.0163  0.0886
1     -0.4215  -1.7572  1.2814  0.1246  0.1284  0.0388  0.1233  0.0921  0.1211  0.2142  0.0162  0.0886
1     -0.4212  -0.2314  -2.1625  0.1246  0.1284  0.0388  0.1233  0.0921  0.1221  0.2142  0.0162  0.0886
1     -0.4214  1.9885  0.8810  0.1247  0.1284  0.0388  0.1234  0.0921  0.1231  0.2142  0.0163  0.0886
1     -0.4212  -0.2314  2.1625  0.1246  0.1284  0.0388  0.1233  0.0921  0.1221  0.2142  0.0162  0.0886
1     -0.4215  -1.7572  -1.2814  0.1246  0.1284  0.0388  0.1233  0.0921  0.1211  0.2142  0.0162  0.0886

Dipole mement (in D)  4.13 (DEN)  2.45  2.21  2.93  3.44  4.10  4.15  3.67  9.32  3.97

```

```

-----
File TZVPMol049.out
Molecule PMol049 pentanenitrile
SP Mol049 B3LYP/Def2TZVP VAC.

```

```

0 15
Dipole      -3.8938  1.9676  0.0000  4.3627
Quadrupole  -5.7247  -0.0355  5.7602  8.3456  0.0000  0.0000
  Atomic coordinates (in A)      Mul.      Lowdin      Hirsch.      I-Hirsch      CM5      ESP      NPA      AIM      ACP
6      0.0250  -1.1191  0.0000  -0.0972  -0.2375  -0.0157  -0.2613  -0.1158  -0.3009  -0.4973  0.1078  -0.1063
6      0.0000  0.4088  0.0000  -0.1976  -0.2447  -0.0360  -0.1543  -0.1459  0.1064  -0.3654  0.0552  -0.1348
1     -0.5067  -1.5076  0.8723  0.1299  0.1620  0.0563  0.1303  0.1130  0.1154  0.2386  0.0468  0.1036
1     -0.5067  -1.5076  -0.8723  0.1299  0.1620  0.0563  0.1303  0.1130  0.1154  0.2386  0.0468  0.1036
6     -1.4158  0.9574  0.0000  -0.1407  -0.2906  -0.0422  -0.1194  -0.1551  0.1868  -0.3828  0.0536  -0.1349
1      0.5461  0.7782  0.8709  0.1063  0.1415  0.0364  0.0998  0.0927  0.0074  0.2032  0.0063  0.0821
1      0.5461  0.7782  -0.8709  0.1063  0.1415  0.0364  0.0998  0.0927  0.0074  0.2032  0.0063  0.0821
6     -1.4550  2.4726  0.0000  -0.3299  -0.3049  -0.0810  -0.3311  -0.2329  -0.3288  -0.5841  0.0143  -0.2457
1     -1.9533  0.5709  -0.8709  0.0877  0.1334  0.0290  0.0857  0.0841  -0.0269  0.1915  -0.0138  0.0779
1     -1.9533  0.5709  0.8709  0.0877  0.1334  0.0290  0.0857  0.0841  -0.0269  0.1915  -0.0138  0.0779
1     -2.4754  2.8517  0.0000  0.1174  0.1191  0.0330  0.1050  0.0844  0.0874  0.2073  0.0018  0.0868
1     -0.9541  2.8826  0.8774  0.1075  0.1189  0.0308  0.1025  0.0826  0.0736  0.1985  -0.0030  0.0833
1     -0.9541  2.8826  -0.8774  0.1075  0.1189  0.0308  0.1025  0.0826  0.0736  0.1985  -0.0030  0.0833
6      1.3654  -1.6689  0.0000  -0.2214  -0.2032  0.0704  0.3542  0.1786  0.4066  0.2861  0.8998  0.2335
7      2.4420  -2.0863  0.0000  0.0065  0.0500  -0.2337  -0.4296  -0.3584  -0.4965  -0.3273  -1.2054  -0.3922

Dipole mement (in D)  4.36 (DEN)  2.56  2.18  3.14  3.91  4.25  4.37  3.72  9.52  4.21

```

-----  
File TZVPMol050.out

Molecule PMol050 benzonitrile

SP Mol050 B3LYP/Def2TZVP VAC.

0 13

Dipole 0.0000 0.0000 -4.7113 4.7113

Quadrupole -0.4279 8.7173 -8.2894 0.0000 0.0000 0.0000

|   | Atomic coordinates (in A) |         |         | Mul.    | Lowdin  | Hirsch. | I-Hirsch | CM5     | ESP     | NPA     | AIM     | ACP     |
|---|---------------------------|---------|---------|---------|---------|---------|----------|---------|---------|---------|---------|---------|
| 6 | 0.0000                    | 0.0000  | 0.6083  | 0.2526  | -0.1456 | 0.0126  | 0.0237   | 0.0087  | 0.1268  | -0.1765 | 0.0747  | 0.0425  |
| 6 | 0.0000                    | 1.2106  | -0.0907 | -0.2006 | -0.0747 | -0.0179 | -0.1010  | -0.0702 | -0.1763 | -0.1518 | -0.0022 | -0.0701 |
| 6 | 0.0000                    | -1.2106 | -0.0907 | -0.2006 | -0.0747 | -0.0179 | -0.1010  | -0.0702 | -0.1763 | -0.1518 | -0.0022 | -0.0701 |
| 6 | 0.0000                    | 1.2038  | -1.4750 | -0.0881 | -0.1258 | -0.0284 | -0.0915  | -0.0843 | -0.1011 | -0.2016 | -0.0130 | -0.0744 |
| 6 | 0.0000                    | -1.2038 | -1.4750 | -0.0881 | -0.1258 | -0.0284 | -0.0915  | -0.0843 | -0.1011 | -0.2016 | -0.0132 | -0.0744 |
| 6 | 0.0000                    | 0.0000  | -2.1677 | -0.1047 | -0.1191 | -0.0223 | -0.0670  | -0.0784 | -0.0833 | -0.1814 | -0.0171 | -0.0677 |
| 1 | 0.0000                    | 2.1423  | 0.4585  | 0.1350  | 0.1550  | 0.0540  | 0.1124   | 0.1115  | 0.1505  | 0.2234  | 0.0596  | 0.0944  |
| 1 | 0.0000                    | -2.1423 | 0.4585  | 0.1350  | 0.1550  | 0.0540  | 0.1124   | 0.1115  | 0.1505  | 0.2234  | 0.0596  | 0.0944  |
| 1 | 0.0000                    | 2.1412  | -2.0153 | 0.1229  | 0.1479  | 0.0494  | 0.1060   | 0.1056  | 0.1243  | 0.2168  | 0.0449  | 0.0946  |
| 1 | 0.0000                    | -2.1412 | -2.0153 | 0.1229  | 0.1479  | 0.0494  | 0.1060   | 0.1056  | 0.1243  | 0.2168  | 0.0449  | 0.0946  |
| 1 | 0.0000                    | 0.0000  | -3.2500 | 0.1231  | 0.1469  | 0.0490  | 0.1024   | 0.1051  | 0.1166  | 0.2143  | 0.0435  | 0.0942  |
| 6 | 0.0000                    | 0.0000  | 2.0313  | -0.2249 | -0.1543 | 0.0659  | 0.2913   | 0.1815  | 0.2886  | 0.2722  | 0.8931  | 0.2197  |
| 7 | 0.0000                    | 0.0000  | 3.1887  | 0.0155  | 0.0674  | -0.2194 | -0.4024  | -0.3420 | -0.4432 | -0.3022 | -1.1731 | -0.3776 |

Dipole moment (in D) 4.71 (DEN) 2.41 2.28 3.51 4.33 4.56 4.71 4.17 9.96 4.58

-----  
File TZVPMol051.out

Molecule PMol051 2-methylaziridine (cis)

SP Mol051 B3LYP/Def2TZVP VAC.

0 11

Dipole -1.2535 -0.9942 -0.8508 1.8121

Quadrupole -1.1590 -0.8807 2.0396 -2.3691 -0.8431 -1.3827

|   | Atomic coordinates (in A) |         |         | Mul.    | Lowdin  | Hirsch. | I-Hirsch | CM5     | ESP     | NPA     | AIM     | ACP     |
|---|---------------------------|---------|---------|---------|---------|---------|----------|---------|---------|---------|---------|---------|
| 7 | 0.9101                    | 0.8125  | -0.0290 | -0.3537 | -0.0146 | -0.1881 | -0.5207  | -0.5186 | -0.5995 | -0.5703 | -0.9036 | -0.4935 |
| 1 | -2.0865                   | 0.8241  | 0.1049  | 0.1161  | 0.1220  | 0.0338  | 0.1101   | 0.0864  | 0.1319  | 0.2067  | 0.0053  | 0.0865  |
| 6 | 1.0094                    | -0.6450 | -0.1501 | -0.1414 | -0.2703 | -0.0379 | -0.1140  | -0.0893 | -0.2172 | -0.2558 | 0.2132  | -0.0682 |
| 1 | 1.8005                    | -1.0983 | 0.4338  | 0.0991  | 0.1184  | 0.0382  | 0.1010   | 0.1006  | 0.1336  | 0.1923  | 0.0298  | 0.0946  |
| 1 | 0.8595                    | -1.0961 | -1.1246 | 0.0958  | 0.1148  | 0.0349  | 0.0942   | 0.0969  | 0.1302  | 0.1819  | 0.0170  | 0.0901  |
| 6 | -0.1570                   | -0.0384 | 0.5046  | 0.0252  | -0.3138 | 0.0028  | 0.1296   | -0.0117 | 0.1737  | -0.0798 | 0.2546  | 0.0506  |
| 1 | -0.1768                   | -0.0422 | 1.5898  | 0.0955  | 0.1365  | 0.0375  | 0.0832   | 0.1036  | 0.0992  | 0.1874  | 0.0234  | 0.0909  |
| 6 | -1.5009                   | -0.0591 | -0.1531 | -0.3303 | -0.2936 | -0.0826 | -0.3779  | -0.2273 | -0.4279 | -0.6058 | 0.0227  | -0.2436 |
| 1 | -1.4037                   | -0.0879 | -1.2397 | 0.0939  | 0.1204  | 0.0316  | 0.1066   | 0.0860  | 0.1253  | 0.1971  | -0.0047 | 0.0847  |
| 1 | -2.0808                   | -0.9321 | 0.1477  | 0.1089  | 0.1244  | 0.0355  | 0.1103   | 0.0874  | 0.1021  | 0.2112  | 0.0080  | 0.0870  |
| 1 | 0.6081                    | 1.1998  | -0.9176 | 0.1909  | 0.1559  | 0.0943  | 0.2776   | 0.2859  | 0.3486  | 0.3350  | 0.3345  | 0.2210  |

Dipole moment (in D) 1.81 (DEN) 1.40 1.13 0.81 1.73 2.02 1.81 2.44 3.39 2.04

-----  
File TZVPMol052.out



Molecule PMol052 2-methylaziridine(trans)

SP Mol052 B3LYP/Def2TZVP VAC.

0 11

Dipole -0.1808 0.5850 1.5291 1.6471

Quadrupole 1.2243 -0.5023 -0.7220 -0.0122 -1.7470 -2.3415

|   | Atomic coordinates (in A) |         |         | Mul.    | Lowdin  | Hirsch. | I-Hirsch | CM5     | ESP     | NPA     | AIM     | ACP     |
|---|---------------------------|---------|---------|---------|---------|---------|----------|---------|---------|---------|---------|---------|
| 7 | -0.8506                   | -0.7393 | -0.3377 | -0.3773 | -0.0161 | -0.1830 | -0.5132  | -0.5146 | -0.5735 | -0.5812 | -0.9095 | -0.4912 |
| 1 | -1.4794                   | -1.2645 | 0.2587  | 0.1949  | 0.1569  | 0.0977  | 0.2756   | 0.2889  | 0.3351  | 0.3416  | 0.3394  | 0.2267  |
| 6 | -0.9844                   | 0.6911  | -0.0527 | -0.1323 | -0.2695 | -0.0381 | -0.1181  | -0.0894 | -0.1686 | -0.2556 | 0.2134  | -0.0683 |
| 1 | -1.7537                   | 1.0191  | 0.6357  | 0.0977  | 0.1134  | 0.0358  | 0.0907   | 0.0971  | 0.0871  | 0.1858  | 0.0190  | 0.0921  |
| 1 | -0.8520                   | 1.3359  | -0.9135 | 0.0948  | 0.1197  | 0.0375  | 0.1046   | 0.1005  | 0.1470  | 0.1886  | 0.0275  | 0.0930  |
| 6 | 0.1645                    | -0.0599 | 0.4732  | 0.0417  | -0.3150 | 0.0026  | 0.1354   | -0.0118 | 0.1306  | -0.0828 | 0.2530  | 0.0501  |
| 1 | 0.1463                    | -0.2608 | 1.5404  | 0.0922  | 0.1299  | 0.0338  | 0.0692   | 0.0986  | 0.0786  | 0.1801  | 0.0102  | 0.0869  |
| 6 | 1.5273                    | 0.0525  | -0.1326 | -0.3265 | -0.2866 | -0.0850 | -0.3775  | -0.2285 | -0.3935 | -0.5966 | 0.0307  | -0.2434 |
| 1 | 1.4529                    | 0.2441  | -1.2020 | 0.1131  | 0.1263  | 0.0357  | 0.1219   | 0.0912  | 0.1425  | 0.2112  | 0.0148  | 0.0879  |
| 1 | 2.0966                    | 0.8652  | 0.3192  | 0.0970  | 0.1199  | 0.0306  | 0.1022   | 0.0827  | 0.0879  | 0.2030  | -0.0020 | 0.0817  |
| 1 | 2.0988                    | -0.8663 | -0.0013 | 0.1046  | 0.1210  | 0.0325  | 0.1092   | 0.0853  | 0.1269  | 0.2060  | 0.0034  | 0.0845  |

Dipole mement (in D) 1.65 (DEN) 1.43 0.50 0.61 1.72 1.72 1.57 2.12 3.16 1.86

-----  
File TZVPMol053.out

Molecule PMol053 E-ethanimine

SP Mol053 B3LYP/Def2TZVP VAC.

0 8

Dipole -0.8108 1.8870 0.0004 2.0538

Quadrupole 1.5952 -0.9336 -0.6617 2.4185 0.0005 0.0001

|   | Atomic coordinates (in A) |         |         | Mul.    | Lowdin  | Hirsch. | I-Hirsch | CM5     | ESP     | NPA     | AIM     | ACP     |
|---|---------------------------|---------|---------|---------|---------|---------|----------|---------|---------|---------|---------|---------|
| 7 | 1.2023                    | -0.3527 | -0.0000 | -0.2892 | -0.0608 | -0.2227 | -0.5877  | -0.5164 | -0.7116 | -0.6066 | -1.1250 | -0.4937 |
| 6 | 0.1858                    | 0.4047  | -0.0001 | -0.0706 | -0.2968 | 0.0583  | 0.3187   | 0.0837  | 0.4234  | 0.1404  | 0.7099  | 0.1450  |
| 1 | 0.2573                    | 1.5026  | 0.0002  | 0.0706  | 0.1099  | 0.0327  | 0.0424   | 0.0954  | -0.0222 | 0.1354  | 0.0106  | 0.0850  |
| 1 | 2.0613                    | 0.1942  | 0.0001  | 0.1960  | 0.1538  | 0.0919  | 0.2717   | 0.2786  | 0.3303  | 0.3279  | 0.3308  | 0.2221  |
| 6 | -1.1952                   | -0.1414 | 0.0000  | -0.2451 | -0.2913 | -0.0845 | -0.4361  | -0.2260 | -0.3092 | -0.6593 | -0.0016 | -0.2391 |
| 1 | -1.1820                   | -1.2280 | -0.0001 | 0.1127  | 0.1278  | 0.0419  | 0.1425   | 0.0979  | 0.1179  | 0.2252  | 0.0387  | 0.0947  |
| 1 | -1.7478                   | 0.2102  | 0.8726  | 0.1128  | 0.1287  | 0.0412  | 0.1242   | 0.0935  | 0.0857  | 0.2185  | 0.0182  | 0.0930  |
| 1 | -1.7480                   | 0.2104  | -0.8723 | 0.1128  | 0.1287  | 0.0412  | 0.1242   | 0.0935  | 0.0857  | 0.2185  | 0.0182  | 0.0930  |

Dipole mement (in D) 2.05 (DEN) 1.14 0.24 1.02 2.03 1.95 2.04 2.42 4.65 2.07

-----  
File TZVPMol054.out

Molecule PMol054 Z-ethanimine

SP Mol054 B3LYP/Def2TZVP VAC.

0 8

Dipole 2.5170 -0.4994 0.0000 2.5661

Quadrupole -3.3188 3.0253 0.2935 1.3455 0.0000 0.0000

|   | Atomic coordinates (in A) |         |        | Mul.    | Lowdin  | Hirsch. | I-Hirsch | CM5     | ESP     | NPA     | AIM     | ACP     |
|---|---------------------------|---------|--------|---------|---------|---------|----------|---------|---------|---------|---------|---------|
| 7 | -1.3076                   | -0.1572 | 0.0000 | -0.2997 | -0.0604 | -0.2276 | -0.5899  | -0.5200 | -0.7557 | -0.5903 | -1.1152 | -0.4952 |

|   |         |         |         |         |         |         |         |         |         |         |         |         |
|---|---------|---------|---------|---------|---------|---------|---------|---------|---------|---------|---------|---------|
| 6 | -0.1890 | 0.4369  | -0.0000 | -0.0324 | -0.3009 | 0.0571  | 0.3084  | 0.0822  | 0.4467  | 0.1413  | 0.7148  | 0.1437  |
| 1 | -0.2195 | 1.5315  | 0.0000  | 0.1013  | 0.1283  | 0.0385  | 0.0640  | 0.1043  | 0.0228  | 0.1533  | 0.0261  | 0.0917  |
| 1 | -1.1718 | -1.1704 | 0.0000  | 0.1802  | 0.1503  | 0.0871  | 0.2705  | 0.2731  | 0.3591  | 0.3136  | 0.3189  | 0.2143  |
| 6 | 1.1758  | -0.1618 | 0.0000  | -0.2868 | -0.2998 | -0.0821 | -0.4350 | -0.2253 | -0.4119 | -0.6723 | -0.0086 | -0.2407 |
| 1 | 1.1416  | -1.2500 | 0.0000  | 0.0971  | 0.1204  | 0.0384  | 0.1239  | 0.0928  | 0.1106  | 0.2064  | 0.0123  | 0.0932  |
| 1 | 1.7413  | 0.1693  | -0.8722 | 0.1201  | 0.1311  | 0.0443  | 0.1291  | 0.0964  | 0.1142  | 0.2240  | 0.0259  | 0.0965  |
| 1 | 1.7413  | 0.1693  | 0.8722  | 0.1201  | 0.1311  | 0.0443  | 0.1291  | 0.0964  | 0.1142  | 0.2240  | 0.0259  | 0.0965  |

Dipole moment (in D) 2.57 (DEN) 1.73 1.13 1.34 2.22 2.43 2.54 2.74 5.04 2.44

-----  
File TZVPMol055.out

Molecule PMol055 Z-N-ethylidene\_methanami

SP Mol055 B3LYP/Def2TZVP VAC.

0 11

Dipole -0.3577 1.4193 0.0000 1.4637

Quadrupole 2.5745 -1.9446 -0.6298 0.0529 0.0000 0.0000

|   | Atomic coordinates (in A) |         |         | Mul.    | Lowdin  | Hirsch. | I-Hirsch | CM5     | ESP     | NPA     | AIM     | ACP     |
|---|---------------------------|---------|---------|---------|---------|---------|----------|---------|---------|---------|---------|---------|
| 7 | 0.4974                    | -0.4732 | -0.0000 | -0.1740 | 0.0747  | -0.1550 | -0.3155  | -0.3661 | -0.4912 | -0.3980 | -1.1497 | -0.3845 |
| 6 | -0.4633                   | 0.3477  | -0.0000 | -0.0570 | -0.2675 | 0.0491  | 0.2554   | 0.0802  | 0.4245  | 0.1260  | 0.7096  | 0.1298  |
| 1 | -0.2830                   | 1.4375  | 0.0000  | 0.0458  | 0.1095  | 0.0263  | 0.0381   | 0.0902  | -0.0058 | 0.1248  | 0.0034  | 0.0752  |
| 6 | 1.8373                    | 0.0546  | 0.0000  | -0.1966 | -0.3335 | -0.0468 | -0.1887  | -0.1320 | 0.0276  | -0.4194 | 0.3388  | -0.1204 |
| 6 | -1.8835                   | -0.0842 | 0.0000  | -0.2609 | -0.2904 | -0.0851 | -0.4359  | -0.2264 | -0.4537 | -0.6459 | 0.0052  | -0.2396 |
| 1 | 1.8834                    | 1.1517  | 0.0000  | 0.0723  | 0.0961  | 0.0201  | 0.0659   | 0.0798  | 0.0012  | 0.1585  | -0.0130 | 0.0750  |
| 1 | 2.3749                    | -0.3170 | 0.8731  | 0.1174  | 0.1146  | 0.0363  | 0.1016   | 0.0975  | 0.0638  | 0.1987  | 0.0194  | 0.0951  |
| 1 | 2.3749                    | -0.3169 | -0.8731 | 0.1174  | 0.1146  | 0.0363  | 0.1016   | 0.0975  | 0.0638  | 0.1987  | 0.0194  | 0.0951  |
| 1 | -1.9590                   | -1.1682 | -0.0000 | 0.1125  | 0.1273  | 0.0401  | 0.1340   | 0.0960  | 0.1267  | 0.2245  | 0.0360  | 0.0925  |
| 1 | -2.4080                   | 0.3084  | 0.8726  | 0.1115  | 0.1273  | 0.0394  | 0.1217   | 0.0916  | 0.1216  | 0.2162  | 0.0154  | 0.0909  |
| 1 | -2.4080                   | 0.3085  | -0.8725 | 0.1115  | 0.1273  | 0.0394  | 0.1217   | 0.0916  | 0.1216  | 0.2162  | 0.0154  | 0.0909  |

Dipole moment (in D) 1.46 (DEN) 0.41 0.35 0.69 1.22 1.57 1.47 1.83 4.02 1.59

-----  
File TZVPMol056.out

Molecule PMol056 N-methylformaldimine

SP Mol056 B3LYP/Def2TZVP VAC.

0 8

Dipole -0.0172 1.4844 0.0000 1.4845

Quadrupole 2.6589 -1.9999 -0.6589 0.5565 0.0000 0.0000

|   | Atomic coordinates (in A) |         |         | Mul.    | Lowdin  | Hirsch. | I-Hirsch | CM5     | ESP     | NPA     | AIM     | ACP     |
|---|---------------------------|---------|---------|---------|---------|---------|----------|---------|---------|---------|---------|---------|
| 7 | 0.1375                    | -0.5329 | -0.0000 | -0.1657 | 0.0563  | -0.1427 | -0.2497  | -0.3577 | -0.4573 | -0.3743 | -1.1326 | -0.3626 |
| 6 | 1.1755                    | 0.1800  | -0.0000 | -0.1460 | -0.2592 | 0.0106  | 0.0294   | 0.0052  | 0.1732  | -0.0586 | 0.7007  | 0.0225  |
| 1 | 1.1605                    | 1.2806  | 0.0000  | 0.0723  | 0.0921  | 0.0307  | 0.0598   | 0.0914  | 0.0394  | 0.1280  | 0.0160  | 0.0835  |
| 6 | -1.1398                   | 0.1342  | 0.0000  | -0.1996 | -0.3311 | -0.0435 | -0.2045  | -0.1291 | 0.1105  | -0.4286 | 0.3327  | -0.1185 |
| 1 | 2.1543                    | -0.2965 | 0.0000  | 0.1194  | 0.1101  | 0.0422  | 0.0800   | 0.1050  | 0.0406  | 0.1677  | 0.0406  | 0.0988  |
| 1 | -1.0711                   | 1.2295  | 0.0000  | 0.0756  | 0.0973  | 0.0228  | 0.0715   | 0.0825  | -0.0017 | 0.1596  | -0.0088 | 0.0779  |
| 1 | -1.7101                   | -0.1843 | -0.8728 | 0.1220  | 0.1172  | 0.0400  | 0.1068   | 0.1014  | 0.0477  | 0.2031  | 0.0258  | 0.0992  |
| 1 | -1.7101                   | -0.1843 | 0.8728  | 0.1220  | 0.1172  | 0.0400  | 0.1068   | 0.1014  | 0.0477  | 0.2031  | 0.0258  | 0.0992  |

Dipole moment (in D) 1.48 (DEN) 0.90 0.43 0.54 1.03 1.56 1.48 1.76 3.96 1.53

-----  
File TZVPMol057.out

Molecule PMol057 diazomethane

SP Mol057 B3LYP/Def2TZVP VAC.

0 5

Dipole 0.0000 0.0000 -1.6683 1.6683

Quadrupole -1.3353 2.3417 -1.0064 0.0000 0.0000 0.0000

|   | Atomic coordinates (in A) |         |         | Mul.    | Lowdin  | Hirsch. | I-Hirsch | CM5     | ESP     | NPA     | AIM     | ACP     |
|---|---------------------------|---------|---------|---------|---------|---------|----------|---------|---------|---------|---------|---------|
| 7 | 0.0000                    | 0.0000  | 1.2899  | -0.1891 | -0.0102 | -0.0987 | -0.2032  | -0.1060 | -0.3725 | -0.0276 | 0.0550  | -0.1177 |
| 7 | 0.0000                    | 0.0000  | 0.1524  | 0.1936  | 0.1441  | 0.1092  | 0.3549   | -0.0053 | 0.6962  | 0.0485  | -0.6030 | 0.0149  |
| 6 | 0.0000                    | 0.0000  | -1.1364 | -0.2960 | -0.3846 | -0.1158 | -0.4819  | -0.1248 | -1.0072 | -0.4747 | 0.3487  | -0.1166 |
| 1 | 0.0000                    | 0.9511  | -1.6387 | 0.1458  | 0.1253  | 0.0527  | 0.1651   | 0.1181  | 0.3418  | 0.2269  | 0.0997  | 0.1097  |
| 1 | 0.0000                    | -0.9511 | -1.6387 | 0.1458  | 0.1253  | 0.0527  | 0.1651   | 0.1181  | 0.3418  | 0.2269  | 0.0997  | 0.1097  |

Dipole moment (in D) 1.67 (DEN) 1.71 0.17 0.73 0.97 1.84 1.68 1.12 3.57 1.81

-----  
File TZVPMol058.out

Molecule PMol058 methyl\_azide

SP Mol058 B3LYP/Def2TZVP VAC.

0 7

Dipole 2.1743 0.9331 0.0000 2.3661

Quadrupole -0.4303 -0.3900 0.8203 1.8539 0.0000 0.0000

|   | Atomic coordinates (in A) |         |         | Mul.    | Lowdin  | Hirsch. | I-Hirsch | CM5     | ESP     | NPA     | AIM     | ACP     |
|---|---------------------------|---------|---------|---------|---------|---------|----------|---------|---------|---------|---------|---------|
| 7 | -1.7935                   | 0.2663  | -0.0000 | -0.2223 | -0.0341 | -0.1222 | -0.2762  | -0.1235 | -0.3917 | -0.0826 | 0.0603  | -0.1366 |
| 7 | -0.7140                   | -0.0925 | 0.0000  | 0.3513  | 0.0653  | 0.1593  | 0.4722   | 0.1447  | 0.6637  | 0.2213  | -0.1386 | 0.1679  |
| 7 | 0.3900                    | -0.6228 | 0.0000  | -0.2910 | -0.0508 | -0.1334 | -0.3291  | -0.2253 | -0.4850 | -0.3150 | -0.3575 | -0.2383 |
| 6 | 1.5440                    | 0.2779  | 0.0000  | -0.2187 | -0.3230 | -0.0311 | -0.1953  | -0.1121 | 0.0059  | -0.4161 | 0.3334  | -0.1027 |
| 1 | 2.4294                    | -0.3478 | 0.0000  | 0.1345  | 0.1212  | 0.0494  | 0.1246   | 0.1126  | 0.1030  | 0.2106  | 0.0458  | 0.1125  |
| 1 | 1.5644                    | 0.9117  | 0.8879  | 0.1231  | 0.1107  | 0.0390  | 0.1019   | 0.1018  | 0.0520  | 0.1909  | 0.0284  | 0.0986  |
| 1 | 1.5644                    | 0.9117  | -0.8879 | 0.1231  | 0.1107  | 0.0390  | 0.1019   | 0.1018  | 0.0520  | 0.1909  | 0.0284  | 0.0986  |

Dipole moment (in D) 2.37 (DEN) 2.20 0.78 1.25 1.88 2.38 2.41 2.20 3.28 2.41

-----  
File TZVPMol059.out

Molecule PMol059 E-2-butenenitrile

SP Mol059 B3LYP/Def2TZVP VAC.

0 10

Dipole 4.7898 0.5594 0.0003 4.8224

Quadrupole -6.1563 4.6830 1.4733 -1.9743 -0.0005 -0.0001

|   | Atomic coordinates (in A) |         |         | Mul.    | Lowdin  | Hirsch. | I-Hirsch | CM5     | ESP     | NPA     | AIM     | ACP     |
|---|---------------------------|---------|---------|---------|---------|---------|----------|---------|---------|---------|---------|---------|
| 6 | -1.4905                   | 0.0901  | -0.0001 | -0.2024 | -0.1963 | 0.0612  | 0.3276   | 0.1737  | 0.4570  | 0.2496  | 0.8910  | 0.2203  |
| 7 | -2.6090                   | -0.2106 | -0.0002 | -0.0041 | 0.0607  | -0.2238 | -0.4096  | -0.3463 | -0.4852 | -0.3072 | -1.1756 | -0.3819 |
| 6 | -0.1318                   | 0.4842  | -0.0000 | -0.0703 | -0.1678 | -0.0283 | -0.2245  | -0.0787 | -0.4447 | -0.3389 | 0.0521  | -0.0665 |

|   |        |         |         |         |         |         |         |         |         |         |        |         |
|---|--------|---------|---------|---------|---------|---------|---------|---------|---------|---------|--------|---------|
| 6 | 0.8841 | -0.3840 | 0.0001  | -0.0536 | -0.1285 | 0.0134  | 0.0667  | -0.0492 | 0.1231  | -0.0659 | 0.0098 | -0.0233 |
| 6 | 2.3133 | -0.0037 | 0.0001  | -0.3138 | -0.2762 | -0.0723 | -0.3872 | -0.2195 | -0.2748 | -0.6365 | 0.0209 | -0.2379 |
| 1 | 0.0539 | 1.5534  | 0.0000  | 0.1355  | 0.1601  | 0.0587  | 0.1361  | 0.1162  | 0.2282  | 0.2296  | 0.0688 | 0.1011  |
| 1 | 0.6542 | -1.4452 | 0.0000  | 0.1318  | 0.1512  | 0.0540  | 0.1046  | 0.1109  | 0.0976  | 0.2051  | 0.0542 | 0.0962  |
| 1 | 2.4517 | 1.0755  | 0.0001  | 0.1164  | 0.1278  | 0.0428  | 0.1252  | 0.0954  | 0.0990  | 0.2122  | 0.0193 | 0.0947  |
| 1 | 2.8262 | -0.4148 | 0.8714  | 0.1303  | 0.1345  | 0.0472  | 0.1305  | 0.0988  | 0.0999  | 0.2261  | 0.0300 | 0.0987  |
| 1 | 2.8263 | -0.4148 | -0.8709 | 0.1303  | 0.1345  | 0.0472  | 0.1305  | 0.0988  | 0.0999  | 0.2261  | 0.0300 | 0.0987  |

Dipole mement (in D) 4.82 (DEN) 3.19 2.81 3.62 4.30 4.71 4.84 4.27 9.99 4.66

-----  
File TZVPMol060.out

Molecule PMol060 Z-2-butenenitrile

SP Mol060 B3LYP/Def2TZVP VAC.

0 10

Dipole -4.1464 1.1772 0.0000 4.3103  
 Quadrupole -4.2758 3.8987 0.3772 2.5940 0.0000 0.0000

|   | Atomic coordinates (in A) |         |         | Mul.    | Lowdin  | Hirsch. | I-Hirsch | CM5     | ESP     | NPA     | AIM     | ACP     |
|---|---------------------------|---------|---------|---------|---------|---------|----------|---------|---------|---------|---------|---------|
| 6 | -1.2065                   | 0.4070  | 0.0000  | -0.0569 | -0.1340 | 0.0125  | 0.0734   | -0.0502 | 0.1756  | -0.0635 | 0.0081  | -0.0232 |
| 6 | 0.0000                    | 0.9846  | 0.0000  | -0.0841 | -0.1731 | -0.0305 | -0.2345  | -0.0812 | -0.5509 | -0.3428 | 0.0502  | -0.0687 |
| 6 | 1.2106                    | 0.2500  | 0.0000  | -0.1920 | -0.1970 | 0.0648  | 0.3417   | 0.1768  | 0.5575  | 0.2444  | 0.8867  | 0.2240  |
| 6 | -1.4706                   | -1.0482 | 0.0000  | -0.3243 | -0.2714 | -0.0744 | -0.4045  | -0.2207 | -0.3138 | -0.6485 | 0.0148  | -0.2419 |
| 1 | -2.0694                   | 1.0648  | 0.0000  | 0.1254  | 0.1474  | 0.0512  | 0.1000   | 0.1071  | 0.0815  | 0.2016  | 0.0447  | 0.0985  |
| 1 | 0.0985                    | 2.0629  | 0.0000  | 0.1433  | 0.1613  | 0.0602  | 0.1344   | 0.1173  | 0.2285  | 0.2383  | 0.0743  | 0.1037  |
| 1 | -0.5541                   | -1.6344 | 0.0000  | 0.1418  | 0.1359  | 0.0437  | 0.1332   | 0.0986  | 0.1266  | 0.2271  | 0.0400  | 0.0892  |
| 1 | -2.0623                   | -1.3340 | 0.8713  | 0.1268  | 0.1351  | 0.0470  | 0.1323   | 0.0987  | 0.1052  | 0.2267  | 0.0292  | 0.0981  |
| 1 | -2.0623                   | -1.3340 | -0.8713 | 0.1268  | 0.1351  | 0.0470  | 0.1323   | 0.0987  | 0.1052  | 0.2267  | 0.0292  | 0.0981  |
| 7 | 2.2070                    | -0.3408 | 0.0000  | -0.0068 | 0.0606  | -0.2216 | -0.4082  | -0.3450 | -0.5155 | -0.3099 | -1.1775 | -0.3779 |

Dipole mement (in D) 4.31 (DEN) 2.65 2.29 3.11 4.01 4.15 4.31 4.03 9.24 4.18

-----  
File TZVPMol061.out

Molecule PMol061 cyanoacetylene

SP Mol061 B3LYP/Def2TZVP VAC.

0 5

Dipole 0.0000 0.0000 -3.8804 3.8804  
 Quadrupole -0.5547 -0.5547 1.1094 0.0000 0.0000 0.0000

|   | Atomic coordinates (in A) |        |         | Mul.    | Lowdin  | Hirsch. | I-Hirsch | CM5     | ESP     | NPA     | AIM     | ACP     |
|---|---------------------------|--------|---------|---------|---------|---------|----------|---------|---------|---------|---------|---------|
| 6 | 0.0000                    | 0.0000 | -1.8315 | -0.0900 | 0.0170  | -0.0154 | -0.1514  | -0.0663 | -0.2377 | -0.0740 | -0.0623 | -0.0748 |
| 6 | 0.0000                    | 0.0000 | -0.6285 | 0.0393  | -0.0896 | -0.0121 | -0.0444  | -0.0107 | -0.0934 | -0.1398 | -0.0398 | 0.0005  |
| 1 | 0.0000                    | 0.0000 | -2.8942 | 0.2193  | 0.1373  | 0.1103  | 0.2175   | 0.1642  | 0.2897  | 0.2419  | 0.2021  | 0.1600  |
| 6 | 0.0000                    | 0.0000 | 0.7332  | -0.2012 | -0.1775 | 0.0875  | 0.3154   | 0.2040  | 0.4686  | 0.2038  | 0.9844  | 0.2395  |
| 7 | 0.0000                    | 0.0000 | 1.8936  | 0.0326  | 0.1128  | -0.1703 | -0.3370  | -0.2912 | -0.4272 | -0.2319 | -1.0844 | -0.3252 |

Dipole mement (in D) 3.88 (DEN) 2.79 1.39 2.60 3.51 3.60 3.89 3.68 8.54 3.68

-----

File TZVPMol062.out

Molecule PMol062 acrylonitrile

SP Mol062 B3LYP/Def2TZVP VAC.

0 7

Dipole 3.9419 0.7372 0.0000 4.0102

Quadrupole -2.8472 3.2406 -0.3934 -1.2411 0.0000 0.0000

|   | Atomic coordinates (in A) |         |         | Mul.    | Lowdin  | Hirsch. | I-Hirsch | CM5     | ESP     | NPA     | AIM     | ACP     |
|---|---------------------------|---------|---------|---------|---------|---------|----------|---------|---------|---------|---------|---------|
| 6 | 0.5795                    | 0.4990  | 0.0000  | -0.0332 | -0.1859 | -0.0098 | -0.1382  | -0.0625 | -0.2128 | -0.3171 | 0.0635  | -0.0414 |
| 6 | -0.7772                   | 0.0887  | -0.0000 | -0.1830 | -0.1895 | 0.0678  | 0.3227   | 0.1806  | 0.4291  | 0.2415  | 0.8964  | 0.2255  |
| 7 | -1.8919                   | -0.2231 | -0.0000 | 0.0014  | 0.0716  | -0.2112 | -0.3921  | -0.3338 | -0.4673 | -0.2918 | -1.1616 | -0.3685 |
| 1 | 0.7449                    | 1.5705  | 0.0000  | 0.1465  | 0.1620  | 0.0657  | 0.1366   | 0.1226  | 0.1763  | 0.2361  | 0.0809  | 0.1098  |
| 6 | 1.6018                    | -0.3528 | 0.0000  | -0.2112 | -0.1219 | -0.0277 | -0.1919  | -0.1289 | -0.2748 | -0.2767 | -0.0123 | -0.1380 |
| 1 | 2.6215                    | 0.0046  | 0.0000  | 0.1366  | 0.1300  | 0.0567  | 0.1300   | 0.1097  | 0.1683  | 0.2031  | 0.0629  | 0.1078  |
| 1 | 1.4519                    | -1.4237 | 0.0000  | 0.1430  | 0.1336  | 0.0585  | 0.1329   | 0.1123  | 0.1813  | 0.2048  | 0.0703  | 0.1048  |

Dipole moment (in D) 4.01 (DEN) 2.22 1.75 2.81 3.61 3.85 4.02 3.61 9.07 3.88

-----  
File TZVPMol063.out

Molecule PMol063 methacrylonitrile

SP Mol063 B3LYP/Def2TZVP VAC.

0 10

Dipole -0.9656 3.9257 0.0000 4.0427

Quadrupole 4.0172 -4.6111 0.5939 2.2095 0.0000 0.0000

|   | Atomic coordinates (in A) |         |         | Mul.    | Lowdin  | Hirsch. | I-Hirsch | CM5     | ESP     | NPA     | AIM     | ACP     |
|---|---------------------------|---------|---------|---------|---------|---------|----------|---------|---------|---------|---------|---------|
| 6 | 0.3053                    | -0.9842 | 0.0000  | -0.1973 | -0.1589 | 0.0672  | 0.2945   | 0.1818  | 0.3291  | 0.2556  | 0.8886  | 0.2227  |
| 7 | 0.5173                    | -2.1223 | 0.0000  | 0.0044  | 0.0687  | -0.2170 | -0.3931  | -0.3398 | -0.4565 | -0.3002 | -1.1719 | -0.3749 |
| 6 | 0.0000                    | 0.4103  | 0.0000  | 0.0968  | -0.2272 | 0.0269  | 0.1261   | 0.0121  | 0.1926  | -0.1275 | 0.0766  | 0.0729  |
| 6 | -1.4536                   | 0.7640  | 0.0000  | -0.3212 | -0.2325 | -0.0704 | -0.4095  | -0.2146 | -0.3085 | -0.6042 | 0.0288  | -0.2415 |
| 6 | 0.9932                    | 1.3015  | 0.0000  | -0.2308 | -0.1137 | -0.0480 | -0.2756  | -0.1468 | -0.5036 | -0.2944 | -0.0264 | -0.1638 |
| 1 | 0.7829                    | 2.3626  | 0.0000  | 0.1241  | 0.1290  | 0.0497  | 0.1306   | 0.1034  | 0.2145  | 0.1974  | 0.0505  | 0.0993  |
| 1 | 2.0305                    | 0.9994  | 0.0000  | 0.1392  | 0.1340  | 0.0532  | 0.1314   | 0.1075  | 0.2060  | 0.2091  | 0.0646  | 0.0986  |
| 1 | -1.5893                   | 1.8424  | 0.0000  | 0.1161  | 0.1296  | 0.0442  | 0.1308   | 0.0972  | 0.1064  | 0.2154  | 0.0223  | 0.0963  |
| 1 | -1.9572                   | 0.3512  | 0.8740  | 0.1343  | 0.1355  | 0.0470  | 0.1324   | 0.0996  | 0.1100  | 0.2244  | 0.0336  | 0.0952  |
| 1 | -1.9572                   | 0.3512  | -0.8740 | 0.1343  | 0.1355  | 0.0470  | 0.1324   | 0.0996  | 0.1100  | 0.2244  | 0.0336  | 0.0952  |

Dipole moment (in D) 4.04 (DEN) 2.14 1.90 2.85 3.43 3.93 4.05 3.51 9.23 3.88

-----  
File TZVPMol064.out

Molecule PMol064 2-cyanopyridine

SP Mol064 B3LYP/Def2TZVP VAC.

0 12

Dipole 1.7261 -5.5816 0.0000 5.8424

Quadrupole 5.0680 -5.6404 0.5724 1.0664 0.0000 0.0000

|   | Atomic coordinates (in A) |         |        | Mul.    | Lowdin  | Hirsch. | I-Hirsch | CM5     | ESP     | NPA     | AIM     | ACP     |
|---|---------------------------|---------|--------|---------|---------|---------|----------|---------|---------|---------|---------|---------|
| 6 | 1.1279                    | -1.5280 | 0.0000 | -0.0828 | -0.1061 | -0.0094 | -0.0259  | -0.0630 | 0.1786  | -0.1650 | -0.0076 | -0.0523 |
| 6 | -0.1177                   | -2.1344 | 0.0000 | -0.0813 | -0.1282 | -0.0261 | -0.1498  | -0.0764 | -0.4216 | -0.2270 | -0.0232 | -0.0665 |

|   |         |         |        |         |         |         |         |         |         |         |         |         |
|---|---------|---------|--------|---------|---------|---------|---------|---------|---------|---------|---------|---------|
| 6 | 1.1964  | -0.1453 | 0.0000 | -0.1629 | -0.0817 | -0.0212 | -0.1811 | -0.0680 | -0.4782 | -0.1934 | -0.0058 | -0.0684 |
| 6 | -1.2497 | -1.3279 | 0.0000 | -0.0510 | -0.1874 | 0.0352  | 0.1474  | 0.0602  | 0.3806  | 0.0404  | 0.5273  | 0.0921  |
| 6 | 0.0000  | 0.5710  | 0.0000 | 0.2500  | -0.2189 | 0.0699  | 0.2389  | 0.1444  | 0.5864  | 0.0614  | 0.5815  | 0.1995  |
| 7 | -1.2105 | -0.0006 | 0.0000 | -0.2121 | 0.1855  | -0.1377 | -0.3690 | -0.3240 | -0.5982 | -0.3631 | -1.0713 | -0.3852 |
| 1 | -0.2161 | -3.2115 | 0.0000 | 0.1285  | 0.1491  | 0.0544  | 0.1155  | 0.1109  | 0.1812  | 0.2210  | 0.0551  | 0.1006  |
| 1 | 2.1426  | 0.3781  | 0.0000 | 0.1385  | 0.1571  | 0.0590  | 0.1269  | 0.1168  | 0.2016  | 0.2297  | 0.0704  | 0.1002  |
| 1 | -2.2400 | -1.7715 | 0.0000 | 0.1301  | 0.1419  | 0.0514  | 0.0886  | 0.1177  | 0.0588  | 0.1977  | 0.0567  | 0.1038  |
| 6 | 0.0391  | 2.0031  | 0.0000 | -0.2201 | -0.1434 | 0.0690  | 0.2620  | 0.1920  | 0.2113  | 0.2591  | 0.9135  | 0.2315  |
| 1 | 2.0337  | -2.1200 | 0.0000 | 0.1355  | 0.1509  | 0.0573  | 0.1145  | 0.1135  | 0.1042  | 0.2207  | 0.0573  | 0.1035  |
| 7 | 0.1110  | 3.1568  | 0.0000 | 0.0276  | 0.0812  | -0.2019 | -0.3682 | -0.3241 | -0.4048 | -0.2815 | -1.1532 | -0.3587 |

Dipole moment (in D) 5.84 (DEN) 3.63 2.22 3.94 5.15 5.66 5.84 5.51 12.37 5.71

-----  
File TZVPMol065.out

Molecule PMol065 3-cyanopyridine

SP Mol065 B3LYP/Def2TZVP VAC.

0 12

Dipole -3.4885 1.9825 0.0003 4.0125

Quadrupole -8.0191 6.0869 1.9322 -4.4902 0.0008 0.0004

|   | Atomic coordinates (in A) |         |         | Mul.    | Lowdin  | Hirsch. | I-Hirsch | CM5     | ESP     | NPA     | AIM     | ACP     |
|---|---------------------------|---------|---------|---------|---------|---------|----------|---------|---------|---------|---------|---------|
| 6 | -0.1289                   | 1.2169  | 0.0000  | -0.1537 | -0.0566 | 0.0004  | -0.0392  | -0.0498 | 0.2535  | -0.1176 | 0.0045  | -0.0486 |
| 6 | -1.5090                   | 1.1510  | 0.0001  | -0.0930 | -0.1333 | -0.0308 | -0.1718  | -0.0811 | -0.5418 | -0.2434 | -0.0185 | -0.0719 |
| 6 | 0.5929                    | 0.0221  | -0.0000 | 0.1922  | -0.1538 | 0.0094  | -0.0512  | 0.0113  | -0.2914 | -0.2136 | 0.0665  | 0.0444  |
| 6 | -2.1169                   | -0.0976 | 0.0002  | -0.0213 | -0.1817 | 0.0395  | 0.1586   | 0.0635  | 0.5557  | 0.0542  | 0.5132  | 0.0968  |
| 6 | -0.1185                   | -1.1836 | 0.0000  | -0.0734 | -0.1406 | 0.0451  | 0.1385   | 0.0742  | 0.4696  | 0.0881  | 0.5522  | 0.0968  |
| 7 | -1.4424                   | -1.2472 | 0.0001  | -0.1986 | 0.1448  | -0.1461 | -0.3577  | -0.3412 | -0.6665 | -0.3964 | -1.1124 | -0.3824 |
| 1 | -2.1075                   | 2.0516  | 0.0002  | 0.1281  | 0.1504  | 0.0552  | 0.1200   | 0.1118  | 0.1930  | 0.2236  | 0.0569  | 0.1013  |
| 6 | 2.0133                    | 0.0182  | -0.0002 | -0.2323 | -0.1553 | 0.0672  | 0.2892   | 0.1831  | 0.3284  | 0.2655  | 0.8966  | 0.2200  |
| 1 | -3.1990                   | -0.1801 | 0.0003  | 0.1337  | 0.1413  | 0.0513  | 0.0867   | 0.1174  | 0.0050  | 0.1963  | 0.0564  | 0.1037  |
| 1 | 0.4204                    | -2.1255 | -0.0000 | 0.1454  | 0.1494  | 0.0558  | 0.0932   | 0.1231  | 0.0349  | 0.2034  | 0.0707  | 0.1030  |
| 1 | 0.3915                    | 2.1654  | -0.0000 | 0.1485  | 0.1578  | 0.0618  | 0.1202   | 0.1192  | 0.0862  | 0.2272  | 0.0717  | 0.1034  |
| 7 | 3.1705                    | 0.0082  | -0.0003 | 0.0245  | 0.0777  | -0.2088 | -0.3864  | -0.3314 | -0.4264 | -0.2872 | -1.1577 | -0.3664 |

Dipole moment (in D) 4.01 (DEN) 2.21 1.97 2.99 3.64 3.88 3.99 3.57 8.52 3.91

-----  
File TZVPMol066.out

Molecule PMol066 4-cyanopyridine

SP Mol066 B3LYP/Def2TZVP VAC.

0 12

Dipole 0.0000 0.0000 -2.0901 2.0901

Quadrupole 2.4614 12.0391 -14.5005 0.0000 0.0000 0.0000

|   | Atomic coordinates (in A) |         |         | Mul.    | Lowdin  | Hirsch. | I-Hirsch | CM5     | ESP     | NPA     | AIM     | ACP     |
|---|---------------------------|---------|---------|---------|---------|---------|----------|---------|---------|---------|---------|---------|
| 6 | 0.0000                    | 0.0000  | 0.5989  | 0.1833  | -0.1363 | 0.0285  | 0.0793   | 0.0269  | 0.5169  | -0.1397 | 0.0768  | 0.0623  |
| 6 | 0.0000                    | 1.1994  | -0.1127 | -0.1382 | -0.0833 | -0.0217 | -0.1845  | -0.0685 | -0.6013 | -0.1965 | -0.0086 | -0.0689 |
| 6 | 0.0000                    | -1.1994 | -0.1127 | -0.1382 | -0.0833 | -0.0217 | -0.1845  | -0.0685 | -0.6013 | -0.1965 | -0.0084 | -0.0689 |
| 6 | 0.0000                    | 1.1382  | -1.4969 | -0.0299 | -0.1896 | 0.0334  | 0.1453   | 0.0577  | 0.5275  | 0.0386  | 0.5193  | 0.0906  |

|   |        |         |         |         |         |         |         |         |         |         |         |         |
|---|--------|---------|---------|---------|---------|---------|---------|---------|---------|---------|---------|---------|
| 6 | 0.0000 | -1.1382 | -1.4969 | -0.0299 | -0.1896 | 0.0334  | 0.1453  | 0.0577  | 0.5275  | 0.0386  | 0.5191  | 0.0906  |
| 7 | 0.0000 | 0.0000  | -2.1887 | -0.1969 | 0.1451  | -0.1444 | -0.3452 | -0.3388 | -0.6636 | -0.3866 | -1.1014 | -0.3801 |
| 1 | 0.0000 | 2.1483  | 0.4053  | 0.1393  | 0.1567  | 0.0592  | 0.1268  | 0.1169  | 0.2196  | 0.2293  | 0.0704  | 0.1006  |
| 1 | 0.0000 | -2.1483 | 0.4053  | 0.1393  | 0.1567  | 0.0592  | 0.1268  | 0.1169  | 0.2196  | 0.2293  | 0.0704  | 0.1006  |
| 1 | 0.0000 | 2.0537  | -2.0794 | 0.1317  | 0.1420  | 0.0512  | 0.0887  | 0.1173  | 0.0198  | 0.1977  | 0.0564  | 0.1033  |
| 1 | 0.0000 | -2.0537 | -2.0794 | 0.1317  | 0.1420  | 0.0512  | 0.0887  | 0.1173  | 0.0198  | 0.1977  | 0.0564  | 0.1033  |
| 6 | 0.0000 | 0.0000  | 2.0226  | -0.2225 | -0.1445 | 0.0730  | 0.2863  | 0.1889  | 0.2259  | 0.2651  | 0.9001  | 0.2248  |
| 7 | 0.0000 | 0.0000  | 3.1793  | 0.0304  | 0.0842  | -0.2012 | -0.3730 | -0.3239 | -0.4103 | -0.2773 | -1.1506 | -0.3583 |

Dipole mement (in D) 2.09 (DEN) 0.61 1.44 2.01 2.23 2.12 2.08 1.40 5.34 2.01

-----  
File TZVPMol067.out

Molecule PMol067 cyanimide  
SP Mol067 B3LYP/Def2TZVP VAC.

0 5

Dipole -1.0065 -4.5486 0.0000 4.6586

Quadrupole -1.0412 -1.2482 2.2894 1.9498 0.0000 0.0000

|   | Atomic coordinates (in A) |         |         | Mul.    | Lowdin  | Hirsch. | I-Hirsch | CM5     | ESP     | NPA     | AIM     | ACP     |
|---|---------------------------|---------|---------|---------|---------|---------|----------|---------|---------|---------|---------|---------|
| 6 | 0.0000                    | 0.2170  | 0.0000  | -0.0477 | -0.3518 | 0.0926  | 0.5701   | 0.2747  | 0.5298  | 0.3920  | 1.4309  | 0.3572  |
| 7 | 0.0849                    | -1.1156 | 0.0000  | -0.4208 | -0.0333 | -0.1239 | -0.8224  | -0.5684 | -0.7283 | -0.8210 | -1.0946 | -0.4911 |
| 1 | -0.2505                   | -1.5643 | 0.8382  | 0.2610  | 0.1859  | 0.1457  | 0.3809   | 0.3364  | 0.3648  | 0.4006  | 0.4187  | 0.2744  |
| 1 | -0.2505                   | -1.5643 | -0.8382 | 0.2610  | 0.1859  | 0.1457  | 0.3809   | 0.3364  | 0.3648  | 0.4006  | 0.4187  | 0.2744  |
| 7 | -0.0133                   | 1.3765  | 0.0000  | -0.0535 | 0.0132  | -0.2600 | -0.5096  | -0.3792 | -0.5310 | -0.3722 | -1.1737 | -0.4150 |

Dipole mement (in D) 4.66 (DEN) 2.22 2.93 3.17 4.27 4.35 4.68 3.89 6.84 3.95

-----  
File TZVPMol068.out

Molecule PMol068 cyanoallene  
SP Mol068 B3LYP/Def2TZVP VAC.

0 8

Dipole 4.3917 0.7928 0.0000 4.4627

Quadrupole -4.6414 3.1853 1.4562 -3.8859 0.0000 0.0000

|   | Atomic coordinates (in A) |         |         | Mul.    | Lowdin  | Hirsch. | I-Hirsch | CM5     | ESP     | NPA     | AIM     | ACP     |
|---|---------------------------|---------|---------|---------|---------|---------|----------|---------|---------|---------|---------|---------|
| 6 | 1.0768                    | 0.0042  | 0.0000  | 0.0741  | -0.0317 | 0.0365  | 0.2204   | 0.0243  | 0.2521  | 0.1685  | -0.2584 | 0.0526  |
| 6 | 2.1475                    | -0.7178 | 0.0000  | -0.2470 | -0.1616 | -0.0649 | -0.3703  | -0.1622 | -0.5167 | -0.4486 | 0.0654  | -0.1725 |
| 6 | 0.0000                    | 0.7504  | 0.0000  | -0.1249 | -0.1576 | -0.0291 | -0.2948  | -0.0742 | -0.4311 | -0.4060 | 0.1525  | -0.0666 |
| 1 | 2.6138                    | -1.0362 | 0.9247  | 0.1520  | 0.1466  | 0.0667  | 0.1669   | 0.1197  | 0.2326  | 0.2347  | 0.0905  | 0.1132  |
| 1 | 2.6138                    | -1.0362 | -0.9247 | 0.1520  | 0.1466  | 0.0667  | 0.1669   | 0.1197  | 0.2326  | 0.2347  | 0.0905  | 0.1132  |
| 1 | 0.0893                    | 1.8326  | 0.0000  | 0.1589  | 0.1744  | 0.0725  | 0.1629   | 0.1295  | 0.2191  | 0.2570  | 0.1030  | 0.1123  |
| 6 | -1.3128                   | 0.2183  | 0.0000  | -0.1611 | -0.1853 | 0.0667  | 0.3469   | 0.1806  | 0.5080  | 0.2568  | 0.9183  | 0.2211  |
| 7 | -2.3980                   | -0.1843 | 0.0000  | -0.0041 | 0.0686  | -0.2152 | -0.3988  | -0.3375 | -0.4966 | -0.2971 | -1.1620 | -0.3734 |

Dipole mement (in D) 4.46 (DEN) 2.79 2.31 3.30 4.05 4.32 4.50 4.09 9.53 4.36

-----  
File TZVPMol069.out

Molecule PMol069 cyclopentadiene-1-carbon

SP Mol069 B3LYP/Def2TZVP VAC.

0 12

Dipole 0.4780 -4.6733 0.0000 4.6977

Quadrupole 7.4121 -8.5704 1.1583 2.9944 0.0000 0.0000

|   | Atomic coordinates (in A) |         |         | Mul.    | Lowdin  | Hirsch. | I-Hirsch | CM5     | ESP     | NPA     | AIM     | ACP     |
|---|---------------------------|---------|---------|---------|---------|---------|----------|---------|---------|---------|---------|---------|
| 6 | -1.0688                   | -0.6687 | 0.0000  | -0.0976 | -0.1708 | -0.0386 | -0.2846  | -0.1358 | 0.0855  | -0.4569 | 0.0191  | -0.1397 |
| 1 | -1.7273                   | -0.5800 | 0.8692  | 0.1294  | 0.1667  | 0.0599  | 0.1417   | 0.1154  | 0.0618  | 0.2531  | 0.0588  | 0.1017  |
| 1 | -1.7273                   | -0.5800 | -0.8692 | 0.1294  | 0.1667  | 0.0599  | 0.1417   | 0.1154  | 0.0618  | 0.2531  | 0.0588  | 0.1017  |
| 6 | -0.2955                   | -1.9371 | 0.0000  | -0.1849 | -0.1192 | -0.0229 | -0.0386  | -0.0823 | -0.2023 | -0.1409 | -0.0473 | -0.0672 |
| 6 | 0.0000                    | 0.3818  | 0.0000  | 0.0809  | -0.1546 | 0.0051  | 0.0256   | -0.0017 | 0.0133  | -0.1457 | 0.0560  | 0.0356  |
| 6 | 1.2103                    | -0.2289 | 0.0000  | -0.1549 | -0.0630 | -0.0125 | -0.0759  | -0.0648 | -0.1417 | -0.1354 | -0.0078 | -0.0639 |
| 6 | 1.0220                    | -1.6615 | 0.0000  | -0.0782 | -0.1367 | -0.0408 | -0.1252  | -0.0964 | -0.1566 | -0.2357 | -0.0305 | -0.0867 |
| 1 | -0.7513                   | -2.9154 | 0.0000  | 0.1301  | 0.1377  | 0.0505  | 0.1078   | 0.1058  | 0.1367  | 0.2151  | 0.0572  | 0.0973  |
| 6 | -0.2563                   | 1.7630  | 0.0000  | -0.2263 | -0.1746 | 0.0568  | 0.2862   | 0.1719  | 0.2686  | 0.2580  | 0.8849  | 0.2107  |
| 1 | 2.1650                    | 0.2766  | 0.0000  | 0.1371  | 0.1466  | 0.0585  | 0.1172   | 0.1146  | 0.1606  | 0.2236  | 0.0686  | 0.1004  |
| 1 | 1.8265                    | -2.3821 | 0.0000  | 0.1264  | 0.1398  | 0.0509  | 0.1131   | 0.1064  | 0.1549  | 0.2201  | 0.0538  | 0.0961  |
| 7 | -0.4937                   | 2.8985  | 0.0000  | 0.0088  | 0.0614  | -0.2270 | -0.4091  | -0.3486 | -0.4425 | -0.3085 | -1.1715 | -0.3859 |

Dipole mement (in D) 4.70 (DEN) 2.65 2.39 3.55 4.34 4.57 4.69 4.22 9.85 4.61

-----  
File TZVPMol070.out

Molecule PMol070 methylaminonitrile

SP Mol070 B3LYP/Def2TZVP VAC.

0 8

Dipole 1.6239 2.1081 0.0000 2.6610

Quadrupole -0.4852 -3.7947 4.2799 -7.0137 0.0000 0.0000

|   | Atomic coordinates (in A) |         |         | Mul.    | Lowdin  | Hirsch. | I-Hirsch | CM5     | ESP     | NPA     | AIM     | ACP     |
|---|---------------------------|---------|---------|---------|---------|---------|----------|---------|---------|---------|---------|---------|
| 7 | 1.4488                    | 0.7128  | 0.0000  | -0.4595 | -0.1351 | -0.1919 | -0.7545  | -0.6447 | -0.9441 | -0.7787 | -0.9676 | -0.5695 |
| 1 | 1.7629                    | 0.1950  | 0.8101  | 0.2165  | 0.1543  | 0.1073  | 0.3161   | 0.2961  | 0.3689  | 0.3553  | 0.3540  | 0.2365  |
| 1 | 1.7629                    | 0.1950  | -0.8101 | 0.2165  | 0.1543  | 0.1073  | 0.3161   | 0.2961  | 0.3689  | 0.3553  | 0.3540  | 0.2365  |
| 6 | 0.0000                    | 0.8201  | 0.0000  | -0.0141 | -0.3208 | 0.0237  | -0.0254  | -0.0209 | 0.4486  | -0.3173 | 0.4456  | 0.0187  |
| 6 | -0.7218                   | -0.4520 | 0.0000  | -0.2392 | -0.2162 | 0.0588  | 0.3050   | 0.1716  | 0.1416  | 0.2467  | 0.8838  | 0.2282  |
| 1 | -0.3180                   | 1.3966  | 0.8700  | 0.1454  | 0.1556  | 0.0607  | 0.1282   | 0.1262  | 0.0167  | 0.2301  | 0.0620  | 0.1167  |
| 1 | -0.3180                   | 1.3966  | -0.8700 | 0.1454  | 0.1556  | 0.0607  | 0.1282   | 0.1262  | 0.0167  | 0.2301  | 0.0620  | 0.1167  |
| 7 | -1.2430                   | -1.4830 | 0.0000  | -0.0110 | 0.0524  | -0.2267 | -0.4138  | -0.3506 | -0.4174 | -0.3216 | -1.1942 | -0.3837 |

Dipole mement (in D) 2.66 (DEN) 1.61 1.80 2.42 2.22 2.65 2.67 1.86 7.24 2.65

-----  
File TZVPMol071.out

Molecule PMol071 methanol

SP Mol071 B3LYP/Def2TZVP VAC.

0 6

Dipole 1.4185 0.9083 0.0000 1.6844

Quadrupole 1.1874 -0.3550 -0.8323 -2.1511 0.0000 0.0000

|  | Atomic coordinates (in A) |  |  | Mul. | Lowdin | Hirsch. | I-Hirsch | CM5 | ESP | NPA | AIM | ACP |
|--|---------------------------|--|--|------|--------|---------|----------|-----|-----|-----|-----|-----|
|--|---------------------------|--|--|------|--------|---------|----------|-----|-----|-----|-----|-----|



|   |         |         |         |         |         |         |         |         |         |         |         |         |
|---|---------|---------|---------|---------|---------|---------|---------|---------|---------|---------|---------|---------|
| 8 | -0.0461 | -0.7527 | 0.0000  | -0.4633 | -0.0723 | -0.2379 | -0.6039 | -0.4607 | -0.6092 | -0.6898 | -1.0812 | -0.3990 |
| 6 | -0.0461 | 0.6574  | 0.0000  | -0.1419 | -0.3839 | -0.0083 | -0.0156 | -0.1344 | 0.1571  | -0.2404 | 0.5084  | -0.1047 |
| 1 | 0.8622  | -1.0568 | 0.0000  | 0.2986  | 0.1645  | 0.1556  | 0.4102  | 0.3294  | 0.3978  | 0.4502  | 0.5555  | 0.2591  |
| 1 | -1.0859 | 0.9759  | 0.0000  | 0.1145  | 0.1078  | 0.0396  | 0.0916  | 0.0999  | 0.0631  | 0.1771  | 0.0242  | 0.0892  |
| 1 | 0.4349  | 1.0792  | 0.8879  | 0.0960  | 0.0919  | 0.0255  | 0.0588  | 0.0829  | -0.0044 | 0.1515  | -0.0035 | 0.0777  |
| 1 | 0.4349  | 1.0792  | -0.8879 | 0.0960  | 0.0919  | 0.0255  | 0.0588  | 0.0829  | -0.0044 | 0.1515  | -0.0035 | 0.0777  |

Dipole moment (in D) 1.68 (DEN) 1.71 0.69 0.78 1.94 1.60 1.68 2.57 3.59 1.46

-----  
 File TZVPMol072.out  
 Molecule PMol072 ethanol  
 SP Mol072 B3LYP/Def2TZVP VAC.  
 0 9

|                                                                            |         |         |         |         |         |         |         |         |         |         |         |         |
|----------------------------------------------------------------------------|---------|---------|---------|---------|---------|---------|---------|---------|---------|---------|---------|---------|
| Dipole                                                                     | 0.0268  | 1.5853  | 0.0000  | 1.5855  |         |         |         |         |         |         |         |         |
| Quadrupole                                                                 | 1.6370  | -0.7710 | -0.8660 | -2.3913 | 0.0000  | 0.0000  |         |         |         |         |         |         |
| Atomic coordinates (in A) Mul. Lowdin Hirsch. I-Hirsch CM5 ESP NPA AIM ACP |         |         |         |         |         |         |         |         |         |         |         |         |
| 1                                                                          | -1.9425 | 0.3738  | 0.0000  | 0.2935  | 0.1635  | 0.1537  | 0.4078  | 0.3276  | 0.3848  | 0.4548  | 0.5544  | 0.2577  |
| 8                                                                          | -1.1910 | -0.2203 | 0.0000  | -0.4558 | -0.0472 | -0.2348 | -0.6243 | -0.4536 | -0.6456 | -0.7014 | -1.0824 | -0.3995 |
| 6                                                                          | 0.0000  | 0.5515  | 0.0000  | -0.0052 | -0.3811 | -0.0236 | 0.1809  | -0.0646 | 0.3750  | -0.0552 | 0.5129  | 0.0024  |
| 6                                                                          | 1.1660  | -0.3988 | 0.0000  | -0.2935 | -0.3108 | -0.0866 | -0.3844 | -0.2356 | -0.2186 | -0.6069 | 0.0229  | -0.2507 |
| 1                                                                          | 0.0405  | 1.2039  | 0.8815  | 0.0758  | 0.1085  | 0.0222  | 0.0414  | 0.0831  | -0.0423 | 0.1470  | -0.0131 | 0.0708  |
| 1                                                                          | 0.0405  | 1.2039  | -0.8815 | 0.0758  | 0.1085  | 0.0222  | 0.0414  | 0.0831  | -0.0423 | 0.1470  | -0.0131 | 0.0708  |
| 1                                                                          | 2.1095  | 0.1438  | 0.0000  | 0.0957  | 0.1193  | 0.0329  | 0.1046  | 0.0848  | 0.0347  | 0.2031  | -0.0013 | 0.0863  |
| 1                                                                          | 1.1421  | -1.0395 | -0.8798 | 0.1068  | 0.1196  | 0.0334  | 0.1162  | 0.0875  | 0.0772  | 0.2059  | 0.0100  | 0.0811  |
| 1                                                                          | 1.1421  | -1.0395 | 0.8798  | 0.1068  | 0.1196  | 0.0334  | 0.1162  | 0.0875  | 0.0772  | 0.2059  | 0.0100  | 0.0811  |

Dipole moment (in D) 1.59 (DEN) 1.49 0.44 0.71 2.00 1.50 1.55 2.47 3.43 1.47

-----  
 File TZVPMol073.out  
 Molecule PMol073 ethylene\_glycol  
 SP Mol073 B3LYP/Def2TZVP VAC.  
 0 10

|                                                                            |         |         |         |         |         |         |         |         |         |         |         |         |
|----------------------------------------------------------------------------|---------|---------|---------|---------|---------|---------|---------|---------|---------|---------|---------|---------|
| Dipole                                                                     | -1.3894 | 1.2195  | 1.4853  | 2.3714  |         |         |         |         |         |         |         |         |
| Quadrupole                                                                 | -4.3311 | 2.1384  | 2.1927  | 0.1062  | -1.8285 | -1.1586 |         |         |         |         |         |         |
| Atomic coordinates (in A) Mul. Lowdin Hirsch. I-Hirsch CM5 ESP NPA AIM ACP |         |         |         |         |         |         |         |         |         |         |         |         |
| 6                                                                          | -0.6776 | 0.5994  | -0.2819 | -0.0332 | -0.3594 | 0.0189  | 0.0667  | -0.0670 | 0.0727  | -0.0954 | 0.4891  | -0.0089 |
| 8                                                                          | -1.3754 | -0.5951 | 0.0513  | -0.4687 | -0.0466 | -0.2222 | -0.6184 | -0.4440 | -0.5841 | -0.7043 | -1.0830 | -0.3861 |
| 1                                                                          | -1.5973 | -0.5659 | 0.9848  | 0.2999  | 0.1677  | 0.1557  | 0.4091  | 0.3300  | 0.3929  | 0.4544  | 0.5565  | 0.2619  |
| 1                                                                          | -0.6460 | 0.6218  | -1.3714 | 0.1023  | 0.1279  | 0.0403  | 0.0888  | 0.1065  | 0.0965  | 0.1810  | 0.0302  | 0.0840  |
| 1                                                                          | -1.2169 | 1.4906  | 0.0562  | 0.0876  | 0.1159  | 0.0319  | 0.0559  | 0.0930  | 0.0106  | 0.1602  | 0.0010  | 0.0815  |
| 6                                                                          | 0.7237  | 0.5699  | 0.2781  | 0.0071  | -0.3721 | 0.0145  | 0.0892  | -0.0694 | 0.1622  | -0.0870 | 0.5249  | -0.0086 |
| 8                                                                          | 1.4264  | -0.5690 | -0.1598 | -0.4550 | -0.0374 | -0.2382 | -0.6215 | -0.4544 | -0.5809 | -0.6912 | -1.0908 | -0.4034 |
| 1                                                                          | 0.6827  | 0.6092  | 1.3779  | 0.0662  | 0.1089  | 0.0189  | 0.0392  | 0.0815  | 0.0051  | 0.1399  | -0.0183 | 0.0637  |
| 1                                                                          | 1.2851  | 1.4462  | -0.0503 | 0.0889  | 0.1267  | 0.0404  | 0.0776  | 0.1040  | 0.0490  | 0.1786  | 0.0194  | 0.0864  |
| 1                                                                          | 0.8084  | -1.3056 | -0.1066 | 0.3049  | 0.1683  | 0.1398  | 0.4134  | 0.3197  | 0.3761  | 0.4638  | 0.5711  | 0.2297  |

Dipole mement (in D) 2.37 (DEN) 2.28 1.27 1.30 2.82 2.38 2.36 3.69 5.26 2.42

-----  
File TZVPMol074.out

Molecule PMol074 propargyl\_alcohol  
SP Mol074 B3LYP/Def2TZVP VAC.

0 8

Dipole 0.9147 0.0702 1.0476 1.3925

Quadrupole -0.2442 1.2204 -0.9762 -1.8452 -1.6058 -1.6377

|   | Atomic coordinates (in A) |         |         | Mul.    | Lowdin  | Hirsch. | I-Hirsch | CM5     | ESP     | NPA     | AIM     | ACP     |
|---|---------------------------|---------|---------|---------|---------|---------|----------|---------|---------|---------|---------|---------|
| 6 | 1.9082                    | -0.2166 | -0.0126 | -0.1239 | -0.0935 | -0.1065 | -0.3029  | -0.1583 | -0.4206 | -0.2219 | -0.1545 | -0.1625 |
| 6 | 0.7682                    | 0.1605  | -0.0055 | -0.1361 | -0.1259 | -0.0512 | 0.0061   | -0.0613 | -0.0731 | -0.0496 | -0.2004 | -0.0328 |
| 1 | 2.9173                    | -0.5468 | -0.0296 | 0.1887  | 0.1261  | 0.0868  | 0.2055   | 0.1408  | 0.3020  | 0.2321  | 0.1645  | 0.1339  |
| 6 | -0.6201                   | 0.5832  | 0.0349  | -0.0293 | -0.3326 | 0.0424  | 0.1137   | -0.0360 | 0.3547  | -0.1396 | 0.5944  | 0.0200  |
| 1 | -0.8283                   | 1.2616  | -0.7940 | 0.1228  | 0.1458  | 0.0553  | 0.1030   | 0.1196  | 0.0665  | 0.2069  | 0.0573  | 0.0967  |
| 1 | -0.7969                   | 1.1551  | 0.9550  | 0.1153  | 0.1340  | 0.0418  | 0.0727   | 0.1034  | -0.0101 | 0.1841  | 0.0329  | 0.0851  |
| 8 | -1.5418                   | -0.4830 | -0.0952 | -0.4377 | -0.0253 | -0.2248 | -0.6125  | -0.4389 | -0.6235 | -0.6701 | -1.0586 | -0.3909 |
| 1 | -1.2949                   | -1.1687 | 0.5293  | 0.3002  | 0.1714  | 0.1562  | 0.4144   | 0.3308  | 0.4042  | 0.4581  | 0.5646  | 0.2505  |

Dipole mement (in D) 1.39 (DEN) 1.84 0.88 0.57 1.68 1.28 1.41 2.56 3.23 1.25

-----  
File TZVPMol075.out

Molecule PMol075 2-propanol  
SP Mol075 B3LYP/Def2TZVP VAC.

0 12

Dipole -0.0089 -1.6388 0.0000 1.6388

Quadrupole 3.2071 -3.0743 -0.1328 -1.3586 0.0000 0.0000

|   | Atomic coordinates (in A) |         |         | Mul.    | Lowdin  | Hirsch. | I-Hirsch | CM5     | ESP     | NPA     | AIM     | ACP     |
|---|---------------------------|---------|---------|---------|---------|---------|----------|---------|---------|---------|---------|---------|
| 6 | -0.2865                   | -0.6064 | 1.2583  | -0.3293 | -0.2949 | -0.0923 | -0.4279  | -0.2401 | -0.5386 | -0.6142 | 0.0026  | -0.2592 |
| 1 | -0.2795                   | 0.0192  | 2.1483  | 0.1211  | 0.1211  | 0.0326  | 0.1188   | 0.0866  | 0.1274  | 0.2130  | 0.0109  | 0.0816  |
| 1 | 0.5963                    | -1.2489 | 1.2917  | 0.0883  | 0.1155  | 0.0261  | 0.1056   | 0.0798  | 0.1259  | 0.1902  | -0.0140 | 0.0772  |
| 1 | -1.1612                   | -1.2548 | 1.3030  | 0.0998  | 0.1213  | 0.0327  | 0.1142   | 0.0850  | 0.1247  | 0.2048  | -0.0003 | 0.0851  |
| 6 | -0.2865                   | 0.2382  | 0.0000  | 0.1362  | -0.4082 | 0.0573  | 0.3402   | 0.0054  | 0.5872  | 0.0951  | 0.5234  | 0.1101  |
| 1 | -1.1720                   | 0.8799  | 0.0000  | 0.0716  | 0.1402  | 0.0350  | 0.0677   | 0.1025  | 0.0219  | 0.1670  | 0.0096  | 0.0775  |
| 6 | -0.2865                   | -0.6064 | -1.2583 | -0.3293 | -0.2949 | -0.0923 | -0.4279  | -0.2401 | -0.5386 | -0.6142 | 0.0028  | -0.2592 |
| 1 | -0.2795                   | 0.0192  | -2.1483 | 0.1211  | 0.1211  | 0.0326  | 0.1188   | 0.0866  | 0.1274  | 0.2130  | 0.0109  | 0.0816  |
| 1 | 0.5963                    | -1.2489 | -1.2917 | 0.0883  | 0.1155  | 0.0261  | 0.1056   | 0.0798  | 0.1259  | 0.1902  | -0.0140 | 0.0772  |
| 1 | -1.1612                   | -1.2548 | -1.3030 | 0.0998  | 0.1213  | 0.0327  | 0.1142   | 0.0850  | 0.1247  | 0.2048  | -0.0003 | 0.0851  |
| 8 | 0.8001                    | 1.1601  | 0.0000  | -0.4524 | -0.0216 | -0.2363 | -0.6373  | -0.4512 | -0.6812 | -0.6956 | -1.0772 | -0.4040 |
| 1 | 1.6171                    | 0.6552  | 0.0000  | 0.2847  | 0.1636  | 0.1458  | 0.4078   | 0.3207  | 0.3930  | 0.4458  | 0.5454  | 0.2470  |

Dipole mement (in D) 1.64 (DEN) 1.50 0.96 0.81 1.72 1.64 1.65 2.81 3.58 1.47

-----  
File TZVPMol076.out

Molecule PMol076 1-propanol(trans)  
SP Mol076 B3LYP/Def2TZVP VAC.

```

0 12
Dipole      -1.1196  -0.9632   0.0000   1.4769
Quadrupole  -3.5967   4.1736  -0.5769  -0.9792   0.0000   0.0000
  Atomic coordinates (in A)      Mul.      Lowdin      Hirsch.      I-Hirsch      CM5      ESP      NPA      AIM      ACP
6      -1.4375   1.2207   0.0000  -0.3435  -0.3092  -0.0829  -0.3276  -0.2346  -0.4260  -0.5886  0.0112  -0.2469
6      0.0000   0.7392   0.0000  -0.1186  -0.2949  -0.0490  -0.1863  -0.1592   0.2403  -0.4040  0.0614  -0.1408
6      0.0964  -0.7666   0.0000  -0.0158  -0.3561   0.0215   0.1635  -0.0648   0.2282  -0.0485  0.5084  -0.0021
1      0.5335   1.1232   0.8718   0.0881   0.1339   0.0309   0.0984   0.0886  -0.0102   0.1991   0.0002   0.0747
1      0.5335   1.1232  -0.8718   0.0881   0.1339   0.0309   0.0984   0.0886  -0.0102   0.1991   0.0002   0.0747
8      1.4670  -1.1269   0.0000  -0.4503  -0.0422  -0.2336  -0.6328  -0.4526  -0.6830  -0.6989  -1.0858  -0.3981
1      1.5347  -2.0824   0.0000   0.2935   0.1635   0.1539   0.4093   0.3278   0.4167   0.4550   0.5552   0.2580
1     -1.4981   2.3071   0.0000   0.1148   0.1184   0.0318   0.1048   0.0832   0.1003   0.2072   0.0002   0.0855
1     -1.9789   0.8656   0.8776   0.1011   0.1163   0.0273   0.0954   0.0791   0.0923   0.1950  -0.0090   0.0795
1     -1.9789   0.8656  -0.8776   0.1011   0.1163   0.0273   0.0954   0.0791   0.0923   0.1950  -0.0090   0.0795
1     -0.4179  -1.1735  -0.8817   0.0708   0.1101   0.0209   0.0408   0.0824  -0.0203   0.1448  -0.0158   0.0680
1     -0.4179  -1.1735   0.8817   0.0708   0.1101   0.0209   0.0408   0.0824  -0.0203   0.1448  -0.0158   0.0680

Dipole mement (in D)   1.48 (DEN)   1.37   0.48   0.69   1.86   1.49   1.49   2.51   3.37   1.41

```

```

-----
File TZVPMol077.out
Molecule PMol077      1-propanol (gauche)
SP Mol077 B3LYP/Def2TZVP VAC.

```

```

0 12
Dipole      -0.7311   0.9225   0.9498   1.5125
Quadrupole   2.7889  -1.5746  -1.2144   0.2392  -1.9554  -0.5647
  Atomic coordinates (in A)      Mul.      Lowdin      Hirsch.      I-Hirsch      CM5      ESP      NPA      AIM      ACP
6      1.5258  -0.5125   0.1273  -0.3319  -0.3100  -0.0867  -0.3293  -0.2375  -0.1655  -0.5916  0.0139  -0.2514
6      0.6306   0.6396  -0.2866  -0.1228  -0.2992  -0.0480  -0.1766  -0.1581   0.1876  -0.4033  0.0605  -0.1389
6     -0.7617   0.5441   0.2895  -0.0243  -0.3559   0.0223   0.1588  -0.0643   0.1621  -0.0527  0.5023  -0.0016
1      0.5528   0.6838  -1.3755   0.0847   0.1351   0.0307   0.0958   0.0882  -0.0022   0.1991  -0.0009   0.0752
1      1.0641   1.5920   0.0266   0.0795   0.1340   0.0299   0.0831   0.0850  -0.0538   0.1958  -0.0131   0.0797
8     -1.3696  -0.6352  -0.2154  -0.4563  -0.0420  -0.2279  -0.6262  -0.4479  -0.6299  -0.7061  -1.0859  -0.3928
1     -2.2411  -0.7226   0.1721   0.2935   0.1641   0.1543   0.4092   0.3284   0.4016   0.4565   0.5559   0.2605
1      2.5228  -0.4208  -0.3005   0.1067   0.1154   0.0277   0.0979   0.0792   0.0270   0.2006  -0.0082   0.0810
1      1.1106  -1.4652  -0.1960   0.1241   0.1217   0.0290   0.1154   0.0839   0.0539   0.2129   0.0181   0.0721
1      1.6372  -0.5569   1.2118   0.0901   0.1149   0.0251   0.0934   0.0773   0.0340   0.1915  -0.0137   0.0764
1     -0.7111   0.5138   1.3868   0.0743   0.1110   0.0212   0.0405   0.0827  -0.0022   0.1451  -0.0157   0.0689
1     -1.3464   1.4310   0.0162   0.0824   0.1110   0.0223   0.0382   0.0834  -0.0128   0.1521  -0.0130   0.0709

Dipole mement (in D)   1.51 (DEN)   1.41   0.65   0.73   1.97   1.51   1.50   2.41   3.28   1.55

```

```

-----
File TZVPMol078.out
Molecule PMol078      1,2-propanediol (CH3-gauc
SP Mol078 B3LYP/Def2TZVP VAC.

```

```

0 13
Dipole      -0.8136   1.0382   1.7774   2.2134

```

Quadrupole    -4.4895    3.1280    1.3616    2.6897    -0.0745    0.4543  
 Atomic coordinates (in A)    Mul.    Lowdin    Hirsch.    I-Hirsch    CM5    ESP    NPA    AIM    ACP  
 6    -0.5452    0.0965    0.4818    0.0581    -0.3905    0.0496    0.2661    0.0011    0.3591    0.0660    0.4817    0.0986  
 8    -0.7228    1.2717    -0.3203    -0.4654    -0.0242    -0.2200    -0.6368    -0.4377    -0.6312    -0.7170    -1.0814    -0.3878  
 1    -0.4565    2.0356    0.1964    0.2977    0.1670    0.1534    0.4064    0.3280    0.3863    0.4585    0.5547    0.2603  
 1    -0.9994    0.2477    1.4696    0.0646    0.1320    0.0287    0.0404    0.0936    -0.0388    0.1584    -0.0076    0.0753  
 6    -1.2470    -1.0266    -0.2391    -0.2952    -0.2816    -0.0894    -0.4261    -0.2358    -0.2750    -0.6102    0.0191    -0.2584  
 6    0.9441    -0.1494    0.6622    0.0105    -0.3465    0.0139    0.0656    -0.0683    0.0924    -0.0800    0.5215    -0.0121  
 1    -2.2994    -0.7945    -0.3849    0.1134    0.1221    0.0335    0.1213    0.0882    0.0874    0.2122    0.0119    0.0811  
 8    1.6068    -0.2575    -0.5755    -0.4543    -0.0331    -0.2337    -0.6101    -0.4508    -0.5671    -0.6938    -1.0912    -0.3998  
 1    -0.7943    -1.1946    -1.2148    0.1119    0.1247    0.0337    0.1292    0.0911    0.0976    0.2160    0.0243    0.0767  
 1    1.1169    -1.0811    1.2042    0.0821    0.1279    0.0386    0.0821    0.1028    0.0698    0.1772    0.0166    0.0840  
 1    -1.1732    -1.9527    0.3287    0.0976    0.1235    0.0345    0.1113    0.0875    0.0558    0.2056    0.0010    0.0867  
 1    1.3743    0.6609    1.2702    0.0751    0.1106    0.0182    0.0390    0.0812    -0.0084    0.1436    -0.0205    0.0635  
 1    1.2491    0.4424    -1.1329    0.3038    0.1682    0.1389    0.4118    0.3191    0.3721    0.4635    0.5697    0.2319  
  
 Dipole mement (in D)    2.21 (DEN)    2.01    1.12    1.21    2.80    2.24    2.19    3.51    4.98    2.41

-----  
 File TZVPMol079.out

Molecule PMol079    1,2-propanediol(CH3-anti  
 SP Mol079 B3LYP/Def2TZVP VAC.  
 0    13

Dipole    2.1867    -0.4368    1.2052    2.5348  
 Quadrupole    -3.4245    0.6780    2.7465    -2.2205    0.0047    2.3041  
 Atomic coordinates (in A)    Mul.    Lowdin    Hirsch.    I-Hirsch    CM5    ESP    NPA    AIM    ACP  
 6    0.4404    0.0272    -0.3523    0.0833    -0.3895    0.0493    0.2485    0.0002    0.2426    0.0629    0.4884    0.0969  
 8    0.3466    1.3971    0.0539    -0.4693    -0.0246    -0.2206    -0.6361    -0.4390    -0.6169    -0.7081    -1.0797    -0.3876  
 1    0.6189    1.4525    0.9744    0.2940    0.1675    0.1502    0.4091    0.3253    0.3958    0.4524    0.5511    0.2553  
 1    0.3316    0.0680    -1.4390    0.0791    0.1436    0.0384    0.0779    0.1083    0.0928    0.1762    0.0239    0.0788  
 6    1.7684    -0.5842    0.0223    -0.3475    -0.2905    -0.0875    -0.4373    -0.2355    -0.4917    -0.6208    -0.0016    -0.2552  
 6    -0.7387    -0.7344    0.2224    0.0329    -0.3484    0.0125    0.0708    -0.0693    0.1000    -0.0770    0.5267    -0.0128  
 1    2.5950    -0.0154    -0.3979    0.1288    0.1242    0.0369    0.1254    0.0908    0.1530    0.2175    0.0174    0.0872  
 8    -1.9602    -0.1212    -0.1036    -0.4545    -0.0345    -0.2396    -0.6201    -0.4556    -0.5912    -0.6917    -1.0961    -0.4048  
 1    1.8931    -0.6107    1.1073    0.0967    0.1183    0.0294    0.1045    0.0831    0.1197    0.1940    -0.0090    0.0813  
 1    -0.6114    -0.8180    1.3147    0.0556    0.1109    0.0172    0.0453    0.0805    0.0228    0.1385    -0.0208    0.0604  
 1    1.8456    -1.6099    -0.3377    0.1108    0.1271    0.0390    0.1193    0.0915    0.1157    0.2139    0.0110    0.0918  
 1    -0.7675    -1.7519    -0.1724    0.0863    0.1274    0.0377    0.0809    0.1020    0.0781    0.1762    0.0150    0.0825  
 1    -1.8161    0.8265    -0.0055    0.3038    0.1686    0.1369    0.4117    0.3177    0.3793    0.4661    0.5730    0.2262  
  
 Dipole mement (in D)    2.53 (DEN)    2.40    1.29    1.53    2.71    2.64    2.55    4.09    5.60    2.63

-----  
 File TZVPMol080.out

Molecule PMol080    1-butanol  
 SP Mol080 B3LYP/Def2TZVP VAC.  
 0    15

Dipole    0.2468    -1.5231    0.0000    1.5430

```

Quadrupole      2.9157  -2.4076  -0.5081  -3.5170   0.0000   0.0000
Atomic coordinates (in A)      Mul.      Lowdin      Hirsch.      I-Hirsch      CM5      ESP      NPA      AIM      ACP
6      1.3416  -0.3469  0.0000  -0.0190  -0.3539  0.0214  0.1630  -0.0649  0.1664  -0.0462  0.5074  -0.0022
6      0.0000  0.3415  0.0000  -0.1305  -0.2698  -0.0510  -0.2224  -0.1594  0.0752  -0.4023  0.0510  -0.1458
1      1.4287  -0.9966  0.8818  0.0716  0.1104  0.0208  0.0383  0.0823  -0.0073  0.1452  -0.0159  0.0680
1      1.4287  -0.9966  -0.8818  0.0716  0.1104  0.0208  0.0383  0.0823  -0.0073  0.1452  -0.0159  0.0680
6      -1.1625  -0.6361  0.0000  -0.1607  -0.2922  -0.0442  -0.1160  -0.1570  0.0653  -0.3811  0.0515  -0.1357
1      -0.0600  0.9981  0.8722  0.0846  0.1359  0.0301  0.0992  0.0882  0.0195  0.1978  -0.0024  0.0724
1      -0.0600  0.9981  -0.8722  0.0846  0.1359  0.0301  0.0992  0.0882  0.0195  0.1978  -0.0024  0.0724
6      -2.5124  0.0543  0.0000  -0.3245  -0.3092  -0.0834  -0.3248  -0.2352  -0.1744  -0.5822  0.0161  -0.2469
1      -1.0846  -1.2943  -0.8705  0.0806  0.1307  0.0253  0.0767  0.0805  -0.0161  0.1883  -0.0193  0.0738
1      -1.0846  -1.2943  0.8705  0.0806  0.1307  0.0253  0.0767  0.0805  -0.0161  0.1883  -0.0193  0.0738
1      -3.3360  -0.6582  0.0000  0.1098  0.1158  0.0286  0.0974  0.0799  0.0510  0.2019  -0.0061  0.0820
1      -2.6315  0.6915  0.8770  0.1028  0.1170  0.0280  0.0983  0.0798  0.0323  0.1956  -0.0074  0.0802
1      -2.6315  0.6915  -0.8770  0.1028  0.1170  0.0280  0.0983  0.0798  0.0323  0.1956  -0.0074  0.0802
8      2.3529  0.6461  0.0000  -0.4474  -0.0419  -0.2336  -0.6310  -0.4526  -0.6558  -0.6989  -1.0850  -0.3980
1      3.2079  0.2141  0.0000  0.2932  0.1633  0.1536  0.4087  0.3275  0.4157  0.4549  0.5548  0.2576

Dipole mement (in D)      1.54 (DEN)      1.41      0.39      0.70      1.97      1.48      1.51      2.46      3.43      1.46

```

-----  
File TZVPMol081.out

Molecule PMol081 cyclopropanol (gauche)

SP Mol081 B3LYP/Def2TZVP VAC.

0 10

```

Dipole      0.3634  1.2946  0.7095  1.5203
Quadrupole  -0.3326  0.0926  0.2400  -3.2106  -0.0913  -0.1340
Atomic coordinates (in A)      Mul.      Lowdin      Hirsch.      I-Hirsch      CM5      ESP      NPA      AIM      ACP
6      0.8870  0.7653  -0.1382  -0.2302  -0.2347  -0.0823  -0.3093  -0.1879  -0.4083  -0.4433  -0.0637  -0.1879
6      0.9015  -0.7387  -0.1310  -0.1889  -0.2218  -0.0727  -0.2849  -0.1779  -0.1804  -0.4226  -0.0401  -0.1783
6      -0.2353  -0.0088  0.4771  0.0594  -0.3509  0.0311  0.2564  -0.0122  0.2051  0.0731  0.4861  0.0753
1      1.5688  1.3006  0.5072  0.0989  0.1240  0.0362  0.1136  0.0911  0.1430  0.2082  0.0235  0.0869
1      1.5952  -1.2555  0.5156  0.1058  0.1259  0.0391  0.1151  0.0942  0.0906  0.2091  0.0257  0.0899
1      -0.3128  -0.0098  1.5606  0.0785  0.1231  0.0328  0.0548  0.0969  0.0518  0.1660  0.0224  0.0781
1      0.6853  1.2488  -1.0832  0.1086  0.1287  0.0381  0.1248  0.0953  0.1597  0.2139  0.0335  0.0854
1      0.7016  -1.2367  -1.0684  0.1087  0.1336  0.0438  0.1355  0.1019  0.1303  0.2210  0.0461  0.0873
8      -1.4532  -0.1087  -0.1994  -0.4390  0.0004  -0.2224  -0.6185  -0.4321  -0.5690  -0.6828  -1.0914  -0.3939
1      -1.9310  0.7155  -0.0835  0.2983  0.1718  0.1564  0.4125  0.3306  0.3772  0.4573  0.5579  0.2572

Dipole mement (in D)      1.52 (DEN)      1.39      0.87      0.68      1.88      1.46      1.49      2.43      3.61      1.40

```

-----  
File TZVPMol082.out

Molecule PMol082 cyclobutanol

SP Mol082 B3LYP/Def2TZVP VAC.

0 13

```

Dipole      -0.3173  1.0404  1.0474  1.5100
Quadrupole  -0.0968  -0.2102  0.3070  3.1192  2.2703  0.3141

```

|                      | Atomic coordinates (in A) |         |            | Mul.    | Lowdin  | Hirsch. | I-Hirsch | CM5     | ESP     | NPA     | AIM     | ACP     |
|----------------------|---------------------------|---------|------------|---------|---------|---------|----------|---------|---------|---------|---------|---------|
| 8                    | 1.8144                    | -0.0859 | -0.1991    | -0.4389 | -0.0127 | -0.2325 | -0.6474  | -0.4436 | -0.6584 | -0.6923 | -1.0990 | -0.4015 |
| 1                    | 2.3831                    | 0.5759  | 0.1983     | 0.2927  | 0.1667  | 0.1542  | 0.4123   | 0.3284  | 0.3863  | 0.4562  | 0.5556  | 0.2556  |
| 6                    | 0.5334                    | 0.0045  | 0.3762     | 0.0546  | -0.3476 | 0.0493  | 0.3080   | 0.0056  | 0.3546  | 0.1038  | 0.5250  | 0.0948  |
| 6                    | -0.4486                   | -1.0628 | -0.0880    | -0.1369 | -0.2181 | -0.0554 | -0.2467  | -0.1602 | -0.1549 | -0.4035 | 0.0168  | -0.1578 |
| 6                    | -0.4567                   | 1.0707  | -0.1176    | -0.1461 | -0.2291 | -0.0634 | -0.2648  | -0.1687 | -0.1811 | -0.4195 | -0.0038 | -0.1655 |
| 1                    | -0.2372                   | -1.3199 | -1.1261    | 0.0854  | 0.1382  | 0.0354  | 0.1131   | 0.0942  | 0.1022  | 0.2055  | 0.0144  | 0.0766  |
| 1                    | -0.2509                   | 1.3047  | -1.1621    | 0.0783  | 0.1342  | 0.0313  | 0.1059   | 0.0892  | 0.0801  | 0.2026  | 0.0086  | 0.0747  |
| 1                    | -0.5373                   | -1.9812 | 0.4900     | 0.0900  | 0.1186  | 0.0283  | 0.0880   | 0.0825  | 0.0362  | 0.1989  | -0.0033 | 0.0771  |
| 1                    | -0.5563                   | 2.0010  | 0.4413     | 0.0885  | 0.1153  | 0.0235  | 0.0817   | 0.0773  | 0.0305  | 0.1945  | -0.0114 | 0.0731  |
| 1                    | 0.5945                    | 0.0197  | 1.4717     | 0.0534  | 0.1277  | 0.0248  | 0.0353   | 0.0901  | -0.0032 | 0.1468  | -0.0097 | 0.0685  |
| 6                    | -1.5530                   | 0.0017  | 0.0029     | -0.2004 | -0.2408 | -0.0514 | -0.1559  | -0.1598 | -0.0703 | -0.3877 | 0.0159  | -0.1509 |
| 1                    | -2.0225                   | 0.0135  | 0.9861     | 0.0864  | 0.1288  | 0.0279  | 0.0850   | 0.0832  | 0.0441  | 0.1931  | -0.0073 | 0.0768  |
| 1                    | -2.3394                   | -0.0116 | -0.7485    | 0.0931  | 0.1188  | 0.0281  | 0.0856   | 0.0818  | 0.0339  | 0.2014  | -0.0017 | 0.0784  |
| Dipole mement (in D) |                           |         | 1.51 (DEN) | 1.40    | 0.64    | 0.67    | 1.82     | 1.42    | 1.48    | 2.36    | 3.48    | 1.39    |

-----  
File TZVPMol083.out  
Molecule PMol083 phenol  
SP Mol083 B3LYP/Def2TZVP VAC.  
0 13

| Dipole               | 0.0711                    | 1.3171  | 0.0001     | 1.3190  |         |         |          |         |         |         |         |         |
|----------------------|---------------------------|---------|------------|---------|---------|---------|----------|---------|---------|---------|---------|---------|
| Quadrupole           | 1.8728                    | 3.5282  | -5.4011    | 4.3356  | 0.0003  | 0.0001  |          |         |         |         |         |         |
|                      | Atomic coordinates (in A) |         |            | Mul.    | Lowdin  | Hirsch. | I-Hirsch | CM5     | ESP     | NPA     | AIM     | ACP     |
| 6                    | 0.9354                    | -0.0246 | 0.0000     | 0.2742  | -0.2753 | 0.0729  | 0.4240   | 0.0842  | 0.4683  | 0.2889  | 0.5044  | 0.1795  |
| 6                    | 0.2198                    | -1.2177 | 0.0000     | -0.1860 | -0.1216 | -0.0565 | -0.2506  | -0.1073 | -0.2722 | -0.2608 | -0.0161 | -0.1083 |
| 6                    | -1.1646                   | -1.1834 | -0.0000    | -0.0851 | -0.1367 | -0.0360 | -0.0450  | -0.0916 | -0.0674 | -0.1828 | -0.0188 | -0.0791 |
| 6                    | -1.8467                   | 0.0278  | -0.0000    | -0.1332 | -0.1600 | -0.0564 | -0.1401  | -0.1125 | -0.1948 | -0.2431 | -0.0282 | -0.1014 |
| 6                    | -1.1252                   | 1.2127  | -0.0000    | -0.1171 | -0.1404 | -0.0384 | -0.0413  | -0.0942 | -0.0369 | -0.1838 | -0.0192 | -0.0812 |
| 6                    | 0.2624                    | 1.1927  | -0.0000    | -0.1970 | -0.1481 | -0.0682 | -0.2859  | -0.1204 | -0.3576 | -0.2915 | -0.0354 | -0.1194 |
| 1                    | 0.7620                    | -2.1537 | 0.0000     | 0.1121  | 0.1474  | 0.0445  | 0.1260   | 0.1039  | 0.1613  | 0.2190  | 0.0477  | 0.0802  |
| 1                    | -1.7168                   | -2.1147 | -0.0000    | 0.1085  | 0.1434  | 0.0418  | 0.0961   | 0.0980  | 0.1106  | 0.2080  | 0.0307  | 0.0857  |
| 1                    | -2.9280                   | 0.0467  | -0.0000    | 0.1063  | 0.1405  | 0.0379  | 0.0940   | 0.0940  | 0.1207  | 0.2089  | 0.0274  | 0.0817  |
| 1                    | -1.6417                   | 2.1642  | -0.0000    | 0.1098  | 0.1429  | 0.0413  | 0.0962   | 0.0974  | 0.1109  | 0.2079  | 0.0304  | 0.0852  |
| 1                    | 0.8256                    | 2.1197  | -0.0000    | 0.0969  | 0.1395  | 0.0363  | 0.1048   | 0.0945  | 0.1421  | 0.2009  | 0.0156  | 0.0796  |
| 8                    | 2.2934                    | -0.1103 | 0.0000     | -0.3965 | 0.0852  | -0.1883 | -0.6112  | -0.3905 | -0.5955 | -0.6423 | -1.1127 | -0.3695 |
| 1                    | 2.6653                    | 0.7749  | 0.0001     | 0.3071  | 0.1832  | 0.1691  | 0.4332   | 0.3446  | 0.4105  | 0.4706  | 0.5746  | 0.2668  |
| Dipole mement (in D) |                           |         | 1.32 (DEN) | 0.97    | 1.54    | 0.62    | 1.53     | 1.30    | 1.31    | 1.95    | 3.64    | 1.12    |

-----  
File TZVPMol084.out  
Molecule PMol084 methyl\_propyl\_ether  
SP Mol084 B3LYP/Def2TZVP VAC.  
0 15

|            |        |         |         |         |        |        |  |  |  |  |  |  |
|------------|--------|---------|---------|---------|--------|--------|--|--|--|--|--|--|
| Dipole     | 0.2510 | 1.0215  | 0.0000  | 1.0519  |        |        |  |  |  |  |  |  |
| Quadrupole | 1.2477 | -0.9444 | -0.3033 | -2.1322 | 0.0000 | 0.0000 |  |  |  |  |  |  |

|   | Atomic coordinates (in A) |         |         | Mul.    | Lowdin  | Hirsch. | I-Hirsch | CM5     | ESP     | NPA     | AIM     | ACP     |
|---|---------------------------|---------|---------|---------|---------|---------|----------|---------|---------|---------|---------|---------|
| 8 | -1.2653                   | -0.2961 | 0.0000  | -0.3074 | 0.1448  | -0.1645 | -0.2996  | -0.2728 | -0.3878 | -0.4911 | -1.0644 | -0.2757 |
| 6 | -2.3100                   | 0.6367  | 0.0000  | -0.1654 | -0.3622 | -0.0075 | -0.0693  | -0.1290 | 0.0349  | -0.2430 | 0.5136  | -0.1022 |
| 1 | -3.2482                   | 0.0868  | 0.0000  | 0.1198  | 0.1090  | 0.0394  | 0.0879   | 0.0999  | 0.0730  | 0.1855  | 0.0239  | 0.0883  |
| 1 | -2.2802                   | 1.2820  | 0.8872  | 0.0936  | 0.0966  | 0.0243  | 0.0568   | 0.0829  | 0.0256  | 0.1525  | -0.0044 | 0.0745  |
| 1 | -2.2802                   | 1.2820  | -0.8872 | 0.0936  | 0.0966  | 0.0243  | 0.0568   | 0.0829  | 0.0256  | 0.1525  | -0.0044 | 0.0745  |
| 6 | 0.0000                    | 0.3215  | 0.0000  | -0.0031 | -0.3343 | 0.0240  | 0.1193   | -0.0577 | 0.1750  | -0.0544 | 0.5103  | 0.0014  |
| 6 | 1.0724                    | -0.7390 | 0.0000  | -0.1139 | -0.2908 | -0.0488 | -0.1941  | -0.1587 | 0.1663  | -0.4010 | 0.0606  | -0.1412 |
| 1 | 0.1019                    | 0.9753  | 0.8813  | 0.0656  | 0.1141  | 0.0210  | 0.0408   | 0.0836  | 0.0071  | 0.1442  | -0.0156 | 0.0663  |
| 1 | 0.1019                    | 0.9753  | -0.8813 | 0.0656  | 0.1141  | 0.0210  | 0.0408   | 0.0836  | 0.0071  | 0.1442  | -0.0156 | 0.0663  |
| 6 | 2.4653                    | -0.1408 | 0.0000  | -0.3450 | -0.3083 | -0.0826 | -0.3256  | -0.2343 | -0.2696 | -0.5874 | 0.0117  | -0.2466 |
| 1 | 0.9308                    | -1.3807 | 0.8720  | 0.0884  | 0.1342  | 0.0311  | 0.0945   | 0.0886  | -0.0164 | 0.1995  | -0.0001 | 0.0745  |
| 1 | 0.9308                    | -1.3807 | -0.8720 | 0.0884  | 0.1342  | 0.0311  | 0.0945   | 0.0886  | -0.0164 | 0.1995  | -0.0001 | 0.0745  |
| 1 | 3.2337                    | -0.9113 | 0.0000  | 0.1154  | 0.1184  | 0.0318  | 0.1049   | 0.0833  | 0.0736  | 0.2073  | 0.0002  | 0.0855  |
| 1 | 2.6329                    | 0.4847  | -0.8777 | 0.1023  | 0.1168  | 0.0277  | 0.0962   | 0.0795  | 0.0510  | 0.1958  | -0.0081 | 0.0799  |
| 1 | 2.6329                    | 0.4847  | 0.8777  | 0.1023  | 0.1168  | 0.0277  | 0.0962   | 0.0795  | 0.0510  | 0.1958  | -0.0081 | 0.0799  |

Dipole mement (in D) 1.05 (DEN) 1.23 0.28 0.60 1.16 1.34 1.09 2.41 3.50 1.35

-----  
File TZVPMol085.out  
Molecule PMol085 dimethyl\_ether  
SP Mol085 B3LYP/Def2TZVP VAC.  
0 9

Dipole 0.0000 0.0000 -1.2401 1.2401  
Quadrupole -0.5995 2.2269 -1.6274 0.0000 0.0000 0.0000

|   | Atomic coordinates (in A) |         |         | Mul.    | Lowdin  | Hirsch. | I-Hirsch | CM5     | ESP     | NPA     | AIM     | ACP     |
|---|---------------------------|---------|---------|---------|---------|---------|----------|---------|---------|---------|---------|---------|
| 8 | 0.0000                    | 0.0000  | 0.5914  | -0.3142 | 0.1182  | -0.1687 | -0.2771  | -0.2806 | -0.3107 | -0.4844 | -1.0600 | -0.2761 |
| 6 | 0.0000                    | 1.1612  | -0.1945 | -0.1487 | -0.3614 | -0.0064 | -0.0688  | -0.1280 | -0.0053 | -0.2477 | 0.5112  | -0.1017 |
| 6 | 0.0000                    | -1.1612 | -0.1945 | -0.1487 | -0.3614 | -0.0064 | -0.0688  | -0.1280 | -0.0053 | -0.2477 | 0.5112  | -0.1017 |
| 1 | 0.8874                    | 1.2167  | -0.8375 | 0.0929  | 0.0965  | 0.0252  | 0.0593   | 0.0838  | 0.0470  | 0.1520  | -0.0033 | 0.0754  |
| 1 | 0.0000                    | 2.0169  | 0.4764  | 0.1200  | 0.1093  | 0.0404  | 0.0886   | 0.1008  | 0.0694  | 0.1860  | 0.0254  | 0.0890  |
| 1 | -0.8874                   | 1.2167  | -0.8375 | 0.0929  | 0.0965  | 0.0252  | 0.0593   | 0.0838  | 0.0443  | 0.1520  | -0.0033 | 0.0754  |
| 1 | 0.8874                    | -1.2167 | -0.8375 | 0.0929  | 0.0965  | 0.0252  | 0.0593   | 0.0838  | 0.0470  | 0.1520  | -0.0033 | 0.0754  |
| 1 | -0.8874                   | -1.2167 | -0.8375 | 0.0929  | 0.0965  | 0.0252  | 0.0593   | 0.0838  | 0.0443  | 0.1520  | -0.0033 | 0.0754  |
| 1 | 0.0000                    | -2.0169 | 0.4764  | 0.1200  | 0.1093  | 0.0404  | 0.0886   | 0.1008  | 0.0694  | 0.1860  | 0.0254  | 0.0890  |

Dipole mement (in D) 1.24 (DEN) 1.56 0.04 0.69 1.21 1.44 1.29 2.51 3.80 1.40

-----  
File TZVPMol086.out  
Molecule PMol086 diethylether  
SP Mol086 B3LYP/Def2TZVP VAC.  
0 15

Dipole 0.0000 0.0000 -1.2992 1.2992  
Quadrupole -0.5964 2.4937 -1.8972 -0.0294 0.0000 0.0000

|   | Atomic coordinates (in A) |        |        | Mul.    | Lowdin | Hirsch. | I-Hirsch | CM5     | ESP     | NPA     | AIM     | ACP     |
|---|---------------------------|--------|--------|---------|--------|---------|----------|---------|---------|---------|---------|---------|
| 8 | 0.0000                    | 0.0000 | 0.8667 | -0.3235 | 0.1550 | -0.1724 | -0.3261  | -0.2754 | -0.4861 | -0.5034 | -1.0538 | -0.2848 |

|   |         |         |         |         |         |         |         |         |         |         |         |         |
|---|---------|---------|---------|---------|---------|---------|---------|---------|---------|---------|---------|---------|
| 6 | 0.0000  | 1.1885  | 0.0984  | 0.0007  | -0.3533 | 0.0260  | 0.1248  | -0.0589 | 0.3466  | -0.0662 | 0.5170  | 0.0008  |
| 6 | 1.3765  | 1.5557  | -0.4096 | -0.3116 | -0.3144 | -0.0908 | -0.4014 | -0.2403 | -0.2940 | -0.6194 | 0.0078  | -0.2561 |
| 1 | -0.3817 | 1.9672  | 0.7605  | 0.0992  | 0.1243  | 0.0343  | 0.0685  | 0.0982  | 0.0048  | 0.1798  | 0.0126  | 0.0793  |
| 1 | -0.7105 | 1.1115  | -0.7349 | 0.0659  | 0.1138  | 0.0239  | 0.0500  | 0.0868  | -0.0316 | 0.1492  | -0.0112 | 0.0716  |
| 1 | 1.3458  | 2.4918  | -0.9665 | 0.1009  | 0.1196  | 0.0327  | 0.1080  | 0.0844  | 0.0567  | 0.2055  | -0.0002 | 0.0859  |
| 1 | 2.0733  | 1.6763  | 0.4182  | 0.1081  | 0.1190  | 0.0323  | 0.1123  | 0.0860  | 0.0818  | 0.2061  | 0.0077  | 0.0806  |
| 1 | 1.7789  | 0.7939  | -1.0768 | 0.0985  | 0.1136  | 0.0279  | 0.1009  | 0.0816  | 0.0816  | 0.1966  | -0.0066 | 0.0805  |
| 6 | 0.0000  | -1.1885 | 0.0984  | 0.0007  | -0.3533 | 0.0260  | 0.1248  | -0.0589 | 0.3327  | -0.0662 | 0.5170  | 0.0008  |
| 6 | -1.3765 | -1.5557 | -0.4096 | -0.3116 | -0.3144 | -0.0908 | -0.4014 | -0.2403 | -0.3091 | -0.6194 | 0.0077  | -0.2561 |
| 1 | 0.3817  | -1.9672 | 0.7605  | 0.0992  | 0.1243  | 0.0343  | 0.0685  | 0.0982  | 0.0093  | 0.1798  | 0.0127  | 0.0793  |
| 1 | 0.7105  | -1.1115 | -0.7349 | 0.0659  | 0.1138  | 0.0239  | 0.0500  | 0.0868  | -0.0280 | 0.1492  | -0.0112 | 0.0716  |
| 1 | -1.3458 | -2.4918 | -0.9665 | 0.1009  | 0.1196  | 0.0327  | 0.1080  | 0.0844  | 0.0629  | 0.2055  | -0.0002 | 0.0859  |
| 1 | -2.0733 | -1.6763 | 0.4182  | 0.1081  | 0.1190  | 0.0323  | 0.1123  | 0.0860  | 0.0857  | 0.2061  | 0.0077  | 0.0806  |
| 1 | -1.7789 | -0.7939 | -1.0768 | 0.0985  | 0.1136  | 0.0279  | 0.1009  | 0.0816  | 0.0866  | 0.1966  | -0.0066 | 0.0805  |

Dipole mement (in D) 1.30 (DEN) 1.38 0.15 0.72 1.11 1.43 1.34 2.57 3.65 1.41

-----  
File TZVPMol087.out

Molecule PMol087 vinyl\_methyl\_ether

SP Mol087 B3LYP/Def2TZVP VAC.

0 10

Dipole -0.4429 0.8121 0.0000 0.9250

Quadrupole 1.9072 0.3496 -2.2568 -2.2965 0.0000 0.0000

|   | Atomic coordinates (in A) | Mul.    | Lowdin  | Hirsch. | I-Hirsch | CM5     | ESP     | NPA     | AIM     | ACP     |
|---|---------------------------|---------|---------|---------|----------|---------|---------|---------|---------|---------|
| 8 | -0.6043 -0.7171 -0.0000   | -0.2642 | 0.2187  | -0.1283 | -0.2451  | -0.2271 | -0.2858 | -0.4550 | -1.0953 | -0.2461 |
| 6 | -1.3596 0.4756 -0.0000    | -0.1890 | -0.3264 | 0.0031  | -0.0941  | -0.1194 | 0.0211  | -0.2560 | 0.4809  | -0.1008 |
| 6 | 0.7349 -0.5660 -0.0000    | 0.0853  | -0.3122 | 0.0360  | 0.2092   | 0.0033  | 0.2022  | 0.1412  | 0.5031  | 0.0826  |
| 1 | -1.1467 1.0770 -0.8877    | 0.1194  | 0.1071  | 0.0351  | 0.0852   | 0.0949  | 0.0587  | 0.1711  | 0.0214  | 0.0828  |
| 1 | -1.1467 1.0770 0.8877     | 0.1194  | 0.1071  | 0.0351  | 0.0852   | 0.0949  | 0.0587  | 0.1711  | 0.0214  | 0.0828  |
| 1 | -2.4053 0.1845 -0.0000    | 0.1296  | 0.1119  | 0.0453  | 0.0983   | 0.1063  | 0.0680  | 0.1908  | 0.0346  | 0.0948  |
| 6 | 1.4303 0.5682 0.0000      | -0.3488 | -0.2834 | -0.1389 | -0.4759  | -0.2406 | -0.6130 | -0.5533 | -0.0876 | -0.2460 |
| 1 | 1.2159 -1.5366 -0.0000    | 0.1171  | 0.1341  | 0.0479  | 0.0804   | 0.1133  | 0.0890  | 0.1826  | 0.0542  | 0.0876  |
| 1 | 0.9758 1.5474 0.0000      | 0.1199  | 0.1187  | 0.0301  | 0.1247   | 0.0859  | 0.2101  | 0.1966  | 0.0291  | 0.0796  |
| 1 | 2.5075 0.5206 0.0000      | 0.1112  | 0.1244  | 0.0346  | 0.1320   | 0.0884  | 0.1911  | 0.2109  | 0.0380  | 0.0827  |

Dipole mement (in D) 0.93 (DEN) 1.00 1.19 0.64 0.75 1.00 0.96 1.67 3.74 0.83

-----  
File TZVPMol088.out

Molecule PMol088 tetrahydrofuran

SP Mol088 B3LYP/Def2TZVP VAC.

0 13

Dipole -0.0001 1.4754 0.6070 1.5954

Quadrupole 2.4446 -2.8396 0.3950 0.0002 0.0001 -0.8191

|   | Atomic coordinates (in A) | Mul.    | Lowdin  | Hirsch. | I-Hirsch | CM5     | ESP    | NPA     | AIM     | ACP     |
|---|---------------------------|---------|---------|---------|----------|---------|--------|---------|---------|---------|
| 6 | 0.7694 1.0062 -0.0506     | -0.1735 | -0.2565 | -0.0532 | -0.2144  | -0.1601 | 0.0046 | -0.4232 | 0.0248  | -0.1540 |
| 1 | 1.1580 1.3656 -1.0017     | 0.0907  | 0.1306  | 0.0305  | 0.0883   | 0.0867  | 0.0133 | 0.2028  | -0.0025 | 0.0800  |



|   |         |         |         |         |         |         |         |         |         |         |         |         |
|---|---------|---------|---------|---------|---------|---------|---------|---------|---------|---------|---------|---------|
| 1 | 1.1919  | 1.6405  | 0.7265  | 0.0871  | 0.1291  | 0.0304  | 0.0869  | 0.0855  | -0.0113 | 0.2044  | -0.0035 | 0.0812  |
| 6 | -0.7695 | 1.0062  | -0.0505 | -0.1734 | -0.2565 | -0.0532 | -0.2144 | -0.1601 | 0.0227  | -0.4233 | 0.0246  | -0.1540 |
| 1 | -1.1582 | 1.3657  | -1.0015 | 0.0907  | 0.1305  | 0.0305  | 0.0883  | 0.0867  | 0.0055  | 0.2028  | -0.0025 | 0.0800  |
| 1 | -1.1919 | 1.6403  | 0.7267  | 0.0871  | 0.1291  | 0.0304  | 0.0869  | 0.0855  | -0.0166 | 0.2044  | -0.0035 | 0.0812  |
| 6 | -1.1231 | -0.4649 | 0.1588  | -0.0040 | -0.3151 | 0.0221  | 0.0925  | -0.0588 | 0.1853  | -0.0751 | 0.4928  | -0.0091 |
| 1 | -1.9946 | -0.8031 | -0.3990 | 0.0970  | 0.1215  | 0.0377  | 0.0706  | 0.1008  | 0.0183  | 0.1873  | 0.0187  | 0.0829  |
| 6 | 1.1231  | -0.4648 | 0.1588  | -0.0040 | -0.3151 | 0.0221  | 0.0925  | -0.0588 | 0.1635  | -0.0751 | 0.4927  | -0.0091 |
| 1 | 1.9947  | -0.8031 | -0.3988 | 0.0970  | 0.1215  | 0.0377  | 0.0706  | 0.1008  | 0.0251  | 0.1873  | 0.0187  | 0.0829  |
| 1 | 1.2987  | -0.6763 | 1.2236  | 0.0653  | 0.1132  | 0.0215  | 0.0411  | 0.0836  | 0.0061  | 0.1478  | -0.0132 | 0.0659  |
| 1 | -1.2988 | -0.6765 | 1.2235  | 0.0653  | 0.1132  | 0.0215  | 0.0411  | 0.0836  | -0.0015 | 0.1478  | -0.0132 | 0.0659  |
| 8 | 0.0001  | -1.1937 | -0.2998 | -0.3252 | 0.1543  | -0.1780 | -0.3301 | -0.2754 | -0.4148 | -0.4878 | -1.0338 | -0.2936 |

Dipole moment (in D) 1.60 (DEN) 1.73 0.13 0.92 1.32 1.64 1.58 2.83 4.31 1.67

-----  
File TZVPMol089.out

Molecule PMol089 anisole

SP Mol089 B3LYP/Def2TZVP VAC.

0 16

Dipole 0.7850 1.0104 0.0000 1.2795  
 Quadrupole 4.5845 0.9110 -5.4955 2.8069 0.0000 0.0000

|   | Atomic coordinates (in A) |         |         | Mul.    | Lowdin  | Hirsch. | I-Hirsch | CM5     | ESP     | NPA     | AIM     | ACP     |
|---|---------------------------|---------|---------|---------|---------|---------|----------|---------|---------|---------|---------|---------|
| 6 | 0.4527                    | -0.2781 | 0.0000  | 0.3218  | -0.2505 | 0.0731  | 0.3649   | 0.0890  | 0.4731  | 0.2824  | 0.5050  | 0.1782  |
| 6 | 0.0417                    | 1.0522  | 0.0000  | -0.2415 | -0.1457 | -0.0674 | -0.2846  | -0.1200 | -0.2725 | -0.3028 | -0.0402 | -0.1199 |
| 6 | -0.4974                   | -1.2999 | 0.0000  | -0.1921 | -0.1175 | -0.0565 | -0.2525  | -0.1070 | -0.3581 | -0.2473 | -0.0181 | -0.1085 |
| 6 | -1.3176                   | 1.3470  | 0.0000  | -0.1161 | -0.1411 | -0.0401 | -0.0424  | -0.0960 | -0.1132 | -0.1843 | -0.0194 | -0.0828 |
| 6 | -1.8438                   | -0.9887 | -0.0000 | -0.0771 | -0.1392 | -0.0382 | -0.0472  | -0.0938 | -0.0235 | -0.1871 | -0.0202 | -0.0811 |
| 6 | -2.2655                   | 0.3376  | 0.0000  | -0.1363 | -0.1600 | -0.0567 | -0.1382  | -0.1128 | -0.2455 | -0.2414 | -0.0294 | -0.1014 |
| 1 | 0.7643                    | 1.8556  | 0.0000  | 0.1129  | 0.1450  | 0.0355  | 0.1062   | 0.0953  | 0.1385  | 0.2119  | 0.0287  | 0.0807  |
| 1 | -0.1541                   | -2.3259 | 0.0000  | 0.1065  | 0.1469  | 0.0428  | 0.1186   | 0.1026  | 0.1624  | 0.2182  | 0.0461  | 0.0773  |
| 1 | -1.6299                   | 2.3839  | 0.0000  | 0.1083  | 0.1424  | 0.0397  | 0.0937   | 0.0959  | 0.1370  | 0.2063  | 0.0275  | 0.0834  |
| 1 | -2.5728                   | -1.7893 | -0.0000 | 0.1068  | 0.1429  | 0.0409  | 0.0950   | 0.0971  | 0.1191  | 0.2075  | 0.0291  | 0.0847  |
| 1 | -3.3204                   | 0.5765  | -0.0000 | 0.1046  | 0.1400  | 0.0373  | 0.0929   | 0.0934  | 0.1465  | 0.2081  | 0.0260  | 0.0810  |
| 8 | 1.7507                    | -0.6766 | 0.0000  | -0.2733 | 0.2430  | -0.1294 | -0.2762  | -0.2206 | -0.3436 | -0.4515 | -1.0964 | -0.2525 |
| 6 | 2.7401                    | 0.3263  | 0.0000  | -0.1917 | -0.3311 | 0.0032  | -0.0915  | -0.1190 | -0.0023 | -0.2487 | 0.4922  | -0.1006 |
| 1 | 3.6975                    | -0.1861 | 0.0000  | 0.1326  | 0.1132  | 0.0460  | 0.1005   | 0.1071  | 0.0890  | 0.1926  | 0.0360  | 0.0956  |
| 1 | 2.6738                    | 0.9601  | 0.8885  | 0.1173  | 0.1059  | 0.0347  | 0.0802   | 0.0943  | 0.0465  | 0.1680  | 0.0169  | 0.0829  |
| 1 | 2.6738                    | 0.9601  | -0.8885 | 0.1173  | 0.1059  | 0.0347  | 0.0802   | 0.0943  | 0.0465  | 0.1680  | 0.0169  | 0.0829  |

Dipole moment (in D) 1.28 (DEN) 1.40 1.31 0.97 1.19 1.39 1.30 2.04 3.59 1.31

-----  
File TZVPMol090.out

Molecule PMol090 tetrahydropyran

SP Mol090 B3LYP/Def2TZVP VAC.

0 16

Dipole 0.9722 1.0905 0.0000 1.4609  
 Quadrupole -0.7411 -1.9790 2.7201 -1.6510 0.0000 0.0000

|                                                                              | Atomic coordinates (in A) |         |         | Mul.    | Lowdin  | Hirsch. | I-Hirsch | CM5     | ESP     | NPA     | AIM     | ACP     |
|------------------------------------------------------------------------------|---------------------------|---------|---------|---------|---------|---------|----------|---------|---------|---------|---------|---------|
| 6                                                                            | 0.6285                    | 1.3107  | 0.0000  | -0.1662 | -0.2649 | -0.0493 | -0.1474  | -0.1588 | 0.0528  | -0.3869 | 0.0371  | -0.1460 |
| 6                                                                            | -0.0218                   | -0.7879 | 1.1705  | -0.0387 | -0.3211 | 0.0226  | 0.1022   | -0.0591 | 0.1249  | -0.0663 | 0.5022  | -0.0067 |
| 6                                                                            | -0.0218                   | -0.7879 | -1.1705 | -0.0387 | -0.3211 | 0.0226  | 0.1022   | -0.0591 | 0.1249  | -0.0663 | 0.5020  | -0.0067 |
| 6                                                                            | -0.0218                   | 0.7267  | -1.2461 | -0.1441 | -0.2680 | -0.0552 | -0.2332  | -0.1631 | -0.0878 | -0.4169 | 0.0351  | -0.1531 |
| 6                                                                            | -0.0218                   | 0.7267  | 1.2461  | -0.1441 | -0.2680 | -0.0552 | -0.2332  | -0.1631 | -0.0878 | -0.4169 | 0.0350  | -0.1531 |
| 8                                                                            | -0.6641                   | -1.2562 | 0.0000  | -0.3204 | 0.1575  | -0.1742 | -0.3321  | -0.2748 | -0.3990 | -0.4976 | -1.0505 | -0.2887 |
| 1                                                                            | 1.6951                    | 1.0615  | 0.0000  | 0.0802  | 0.1335  | 0.0244  | 0.0766   | 0.0805  | 0.0106  | 0.1881  | -0.0198 | 0.0716  |
| 1                                                                            | 1.0144                    | -1.1623 | 1.1956  | 0.0693  | 0.1159  | 0.0207  | 0.0403   | 0.0835  | 0.0209  | 0.1432  | -0.0156 | 0.0651  |
| 1                                                                            | 1.0144                    | -1.1623 | -1.1956 | 0.0693  | 0.1159  | 0.0207  | 0.0403   | 0.0835  | 0.0209  | 0.1432  | -0.0156 | 0.0651  |
| 1                                                                            | -1.0543                   | 1.0767  | -1.3261 | 0.0795  | 0.1353  | 0.0290  | 0.0915   | 0.0866  | 0.0521  | 0.1963  | -0.0069 | 0.0738  |
| 1                                                                            | -1.0543                   | 1.0767  | 1.3261  | 0.0795  | 0.1353  | 0.0290  | 0.0915   | 0.0866  | 0.0521  | 0.1963  | -0.0069 | 0.0738  |
| 1                                                                            | 0.5693                    | 2.3998  | 0.0000  | 0.0952  | 0.1313  | 0.0294  | 0.0862   | 0.0841  | -0.0043 | 0.2038  | -0.0098 | 0.0796  |
| 1                                                                            | -0.5529                   | -1.2373 | 2.0094  | 0.1020  | 0.1250  | 0.0363  | 0.0687   | 0.1001  | 0.0469  | 0.1859  | 0.0150  | 0.0811  |
| 1                                                                            | -0.5529                   | -1.2373 | -2.0094 | 0.1020  | 0.1250  | 0.0363  | 0.0687   | 0.1001  | 0.0469  | 0.1859  | 0.0150  | 0.0811  |
| 1                                                                            | 0.4936                    | 1.0520  | -2.1516 | 0.0876  | 0.1342  | 0.0314  | 0.0889   | 0.0865  | 0.0130  | 0.2040  | -0.0087 | 0.0814  |
| 1                                                                            | 0.4936                    | 1.0520  | 2.1516  | 0.0876  | 0.1342  | 0.0314  | 0.0889   | 0.0865  | 0.0130  | 0.2040  | -0.0087 | 0.0814  |
| Dipole mement (in D) 1.46 (DEN) 1.85 0.11 0.82 1.21 1.52 1.45 2.65 3.96 1.52 |                           |         |         |         |         |         |          |         |         |         |         |         |

-----  
File TZVPMol091.out

Molecule PMol091 1,3-dioxane

SP Mol091 B3LYP/Def2TZVP VAC.

0 14

Dipole 1.5812 0.0000 1.2915 2.0416  
 Quadrupole 2.5334 -2.2433 -0.2901 0.0001 -1.0288 0.0000

|                                                                              | Atomic coordinates (in A) |         |         | Mul.    | Lowdin  | Hirsch. | I-Hirsch | CM5     | ESP     | NPA     | AIM     | ACP     |
|------------------------------------------------------------------------------|---------------------------|---------|---------|---------|---------|---------|----------|---------|---------|---------|---------|---------|
| 8                                                                            | -0.7102                   | -1.1662 | -0.2767 | -0.3055 | 0.1645  | -0.1723 | -0.3665  | -0.2696 | -0.4060 | -0.4974 | -1.0512 | -0.2900 |
| 8                                                                            | -0.7103                   | 1.1661  | -0.2767 | -0.3055 | 0.1645  | -0.1723 | -0.3665  | -0.2696 | -0.4060 | -0.4974 | -1.0510 | -0.2900 |
| 6                                                                            | 1.3981                    | 0.0000  | -0.2193 | -0.1335 | -0.2725 | -0.0603 | -0.3101  | -0.1655 | -0.0165 | -0.4486 | 0.0318  | -0.1601 |
| 6                                                                            | 0.6225                    | -1.2314 | 0.2067  | -0.0314 | -0.3163 | 0.0242  | 0.1000   | -0.0570 | 0.1984  | -0.0737 | 0.4895  | -0.0069 |
| 6                                                                            | -1.3365                   | -0.0000 | 0.1738  | 0.0848  | -0.4091 | 0.0882  | 0.3167   | 0.0372  | 0.2561  | 0.2055  | 1.0044  | 0.1315  |
| 6                                                                            | 0.6225                    | 1.2314  | 0.2067  | -0.0314 | -0.3163 | 0.0242  | 0.1000   | -0.0570 | 0.1984  | -0.0737 | 0.4895  | -0.0069 |
| 1                                                                            | 1.5177                    | 0.0000  | -1.3034 | 0.0867  | 0.1381  | 0.0352  | 0.1070   | 0.0945  | 0.0482  | 0.2072  | 0.0107  | 0.0769  |
| 1                                                                            | 0.6084                    | -1.3076 | 1.3051  | 0.0760  | 0.1175  | 0.0234  | 0.0438   | 0.0867  | 0.0004  | 0.1519  | -0.0083 | 0.0684  |
| 1                                                                            | -1.3589                   | -0.0000 | 1.2802  | 0.0683  | 0.1009  | 0.0196  | 0.0086   | 0.0907  | 0.0138  | 0.1091  | -0.0039 | 0.0617  |
| 1                                                                            | 0.6084                    | 1.3076  | 1.3051  | 0.0760  | 0.1175  | 0.0234  | 0.0438   | 0.0867  | 0.0004  | 0.1519  | -0.0083 | 0.0684  |
| 1                                                                            | 2.3943                    | 0.0000  | 0.2252  | 0.0851  | 0.1376  | 0.0373  | 0.1015   | 0.0927  | -0.0227 | 0.2079  | 0.0005  | 0.0876  |
| 1                                                                            | 1.0521                    | -2.1519 | -0.1851 | 0.1087  | 0.1265  | 0.0411  | 0.0796   | 0.1049  | 0.0266  | 0.1909  | 0.0241  | 0.0868  |
| 1                                                                            | -2.3494                   | -0.0000 | -0.2232 | 0.1131  | 0.1205  | 0.0470  | 0.0623   | 0.1203  | 0.0823  | 0.1753  | 0.0473  | 0.0857  |
| 1                                                                            | 1.0520                    | 2.1519  | -0.1851 | 0.1087  | 0.1265  | 0.0411  | 0.0796   | 0.1049  | 0.0266  | 0.1909  | 0.0241  | 0.0868  |
| Dipole mement (in D) 2.04 (DEN) 2.45 0.33 1.20 2.02 2.24 2.04 3.85 5.62 2.22 |                           |         |         |         |         |         |          |         |         |         |         |         |

-----  
File TZVPMol092.out

Molecule PMol092 3,4-dihydro-2,4-pyran

SP Mol092 B3LYP/Def2TZVP VAC.

0 14

Dipole -1.1727 -0.6059 0.2493 1.3433

Quadrupole -1.4310 2.6575 -1.2265 0.7984 0.1569 -0.5438

|   | Atomic coordinates (in A) |         |         | Mul.    | Lowdin  | Hirsch. | I-Hirsch | CM5     | ESP     | NPA     | AIM     | ACP     |
|---|---------------------------|---------|---------|---------|---------|---------|----------|---------|---------|---------|---------|---------|
| 6 | -1.4446                   | 0.2759  | 0.1275  | -0.1345 | -0.2567 | -0.0505 | -0.1477  | -0.1551 | 0.3457  | -0.4196 | 0.0495  | -0.1444 |
| 6 | 0.5391                    | -1.2083 | 0.2896  | -0.0017 | -0.2838 | 0.0318  | 0.0916   | -0.0501 | 0.3211  | -0.0676 | 0.4728  | -0.0053 |
| 6 | 0.8879                    | 1.0739  | -0.0832 | 0.0217  | -0.2778 | 0.0223  | 0.1511   | -0.0073 | 0.0862  | 0.1234  | 0.4721  | 0.0577  |
| 6 | -0.4075                   | 1.3504  | 0.0632  | -0.2115 | -0.2224 | -0.0874 | -0.2628  | -0.1463 | -0.4783 | -0.3196 | -0.0526 | -0.1306 |
| 6 | -0.8337                   | -1.0445 | -0.3236 | -0.1761 | -0.2577 | -0.0512 | -0.2319  | -0.1583 | -0.1709 | -0.4159 | 0.0410  | -0.1507 |
| 8 | 1.4325                    | -0.1674 | -0.1097 | -0.2826 | 0.2218  | -0.1428 | -0.2876  | -0.2332 | -0.3582 | -0.4688 | -1.0853 | -0.2625 |
| 1 | -1.8521                   | 0.1827  | 1.1400  | 0.0909  | 0.1368  | 0.0280  | 0.0855   | 0.0831  | -0.0352 | 0.1998  | -0.0058 | 0.0738  |
| 1 | 0.4711                    | -1.1969 | 1.3840  | 0.0801  | 0.1257  | 0.0313  | 0.0618   | 0.0950  | -0.0046 | 0.1638  | 0.0080  | 0.0722  |
| 1 | -0.7364                   | -1.0582 | -1.4112 | 0.0955  | 0.1404  | 0.0325  | 0.0974   | 0.0906  | 0.0723  | 0.2022  | 0.0027  | 0.0747  |
| 1 | -2.2977                   | 0.5347  | -0.5037 | 0.0967  | 0.1389  | 0.0330  | 0.0944   | 0.0880  | -0.0408 | 0.2097  | 0.0005  | 0.0815  |
| 1 | 1.0219                    | -2.1369 | -0.0091 | 0.1091  | 0.1264  | 0.0404  | 0.0743   | 0.1043  | -0.0052 | 0.1880  | 0.0227  | 0.0861  |
| 1 | 1.6485                    | 1.8346  | -0.2027 | 0.1137  | 0.1325  | 0.0447  | 0.0771   | 0.1097  | 0.1182  | 0.1854  | 0.0508  | 0.0842  |
| 1 | -0.7032                   | 2.3896  | 0.0910  | 0.1034  | 0.1393  | 0.0325  | 0.1017   | 0.0890  | 0.1497  | 0.2109  | 0.0251  | 0.0775  |
| 1 | -1.4600                   | -1.8943 | -0.0512 | 0.0953  | 0.1365  | 0.0353  | 0.0950   | 0.0905  | 0.0001  | 0.2083  | -0.0018 | 0.0859  |

Dipole mement (in D) 1.34 (DEN) 1.63 1.19 0.78 0.94 1.30 1.31 1.98 4.28 1.23

-----  
File TZVPMol093.out

Molecule PMol093 oxetane

SP Mol093 B3LYP/Def2TZVP VAC.

0 10

Dipole 0.0000 -1.9436 0.0000 1.9436

Quadrupole 0.8570 -2.7823 1.9252 0.0000 0.0000 0.0000

|   | Atomic coordinates (in A) |         |         | Mul.    | Lowdin  | Hirsch. | I-Hirsch | CM5     | ESP     | NPA     | AIM     | ACP     |
|---|---------------------------|---------|---------|---------|---------|---------|----------|---------|---------|---------|---------|---------|
| 8 | -0.0000                   | 1.0653  | 0.0000  | -0.3437 | 0.1142  | -0.1978 | -0.3511  | -0.2855 | -0.5184 | -0.4950 | -0.9895 | -0.3065 |
| 6 | 0.0000                    | -1.0650 | 0.0000  | -0.2570 | -0.2502 | -0.0560 | -0.2781  | -0.1599 | -0.4473 | -0.4471 | 0.0080  | -0.1567 |
| 6 | 0.0000                    | 0.0611  | 1.0274  | 0.0503  | -0.2797 | 0.0302  | 0.1084   | -0.0506 | 0.4542  | -0.0565 | 0.4689  | -0.0069 |
| 6 | 0.0000                    | 0.0611  | -1.0274 | 0.0503  | -0.2797 | 0.0302  | 0.1084   | -0.0506 | 0.4542  | -0.0565 | 0.4688  | -0.0069 |
| 1 | 0.8866                    | 0.1331  | 1.6641  | 0.0735  | 0.1111  | 0.0309  | 0.0550   | 0.0915  | -0.0394 | 0.1623  | 0.0074  | 0.0761  |
| 1 | 0.8866                    | 0.1331  | -1.6641 | 0.0735  | 0.1111  | 0.0309  | 0.0550   | 0.0915  | -0.0394 | 0.1623  | 0.0074  | 0.0761  |
| 1 | -0.8866                   | 0.1331  | 1.6641  | 0.0735  | 0.1111  | 0.0309  | 0.0550   | 0.0915  | -0.0403 | 0.1623  | 0.0074  | 0.0761  |
| 1 | -0.8866                   | 0.1331  | -1.6641 | 0.0735  | 0.1111  | 0.0309  | 0.0550   | 0.0915  | -0.0403 | 0.1623  | 0.0074  | 0.0761  |
| 1 | 0.8828                    | -1.6988 | 0.0000  | 0.1030  | 0.1255  | 0.0350  | 0.0962   | 0.0903  | 0.1084  | 0.2031  | 0.0072  | 0.0863  |
| 1 | -0.8828                   | -1.6988 | 0.0000  | 0.1030  | 0.1255  | 0.0350  | 0.0962   | 0.0903  | 0.1082  | 0.2031  | 0.0072  | 0.0863  |

Dipole mement (in D) 1.94 (DEN) 1.91 0.06 1.20 1.74 1.91 1.97 3.18 4.93 1.99

-----  
File TZVPMol094.out

Molecule PMol094 3-methyleneoxetane

SP Mol094 B3LYP/Def2TZVP VAC.

0 11

Dipole 0.0000 0.0000 -1.5556 1.5556  
 Quadrupole -0.5601 3.8810 -3.3209 0.0000 0.0000 0.0000

|   | Atomic coordinates (in A) |         |         | Mul.    | Lowdin  | Hirsch. | I-Hirsch | CM5     | ESP     | NPA     | AIM     | ACP     |
|---|---------------------------|---------|---------|---------|---------|---------|----------|---------|---------|---------|---------|---------|
| 8 | 0.0000                    | 0.0000  | 1.4942  | -0.3544 | 0.1219  | -0.1941 | -0.3406  | -0.2784 | -0.5181 | -0.4868 | -0.9724 | -0.3028 |
| 6 | 0.0000                    | 0.0000  | -0.5953 | -0.0869 | -0.2067 | -0.0024 | 0.0781   | -0.0180 | -0.1065 | -0.0338 | -0.0477 | 0.0351  |
| 6 | 0.0000                    | 1.0312  | 0.4886  | 0.0579  | -0.2318 | 0.0285  | 0.0420   | -0.0469 | 0.4156  | -0.0978 | 0.4502  | -0.0118 |
| 6 | 0.0000                    | -1.0312 | 0.4886  | 0.0579  | -0.2318 | 0.0285  | 0.0420   | -0.0469 | 0.4156  | -0.0978 | 0.4499  | -0.0118 |
| 1 | -0.8884                   | 1.6687  | 0.5513  | 0.0883  | 0.1224  | 0.0392  | 0.0723   | 0.0999  | -0.0209 | 0.1774  | 0.0262  | 0.0813  |
| 1 | -0.8884                   | -1.6687 | 0.5513  | 0.0883  | 0.1224  | 0.0392  | 0.0723   | 0.0999  | -0.0209 | 0.1774  | 0.0262  | 0.0813  |
| 1 | 0.8884                    | 1.6687  | 0.5513  | 0.0883  | 0.1224  | 0.0392  | 0.0723   | 0.0999  | -0.0189 | 0.1774  | 0.0262  | 0.0813  |
| 1 | 0.8884                    | -1.6687 | 0.5513  | 0.0883  | 0.1224  | 0.0392  | 0.0723   | 0.0999  | -0.0189 | 0.1774  | 0.0262  | 0.0813  |
| 6 | 0.0000                    | 0.0000  | -1.9144 | -0.2588 | -0.1922 | -0.0961 | -0.3537  | -0.1947 | -0.5089 | -0.3919 | -0.0584 | -0.2072 |
| 1 | 0.0000                    | -0.9213 | -2.4818 | 0.1154  | 0.1255  | 0.0394  | 0.1216   | 0.0927  | 0.1910  | 0.1991  | 0.0364  | 0.0867  |
| 1 | 0.0000                    | 0.9213  | -2.4818 | 0.1154  | 0.1255  | 0.0394  | 0.1216   | 0.0927  | 0.1910  | 0.1991  | 0.0364  | 0.0867  |

Dipole mement (in D) 1.56 (DEN) 1.46 0.45 0.89 1.35 1.53 1.55 3.12 4.78 1.63

-----  
 File TZVPMol095.out  
 Molecule PMol095 formaldehyde  
 SP Mol095 B3LYP/Def2TZVP VAC.  
 0 4

Dipole 0.0000 0.0000 -2.3077 2.3077  
 Quadrupole 0.2227 0.1725 -0.3952 0.0000 0.0000 0.0000

|   | Atomic coordinates (in A) |         |         | Mul.    | Lowdin  | Hirsch. | I-Hirsch | CM5     | ESP     | NPA     | AIM     | ACP     |
|---|---------------------------|---------|---------|---------|---------|---------|----------|---------|---------|---------|---------|---------|
| 8 | 0.0000                    | 0.0000  | 0.6720  | -0.2315 | 0.1099  | -0.2153 | -0.3832  | -0.2774 | -0.4044 | -0.4767 | -1.1037 | -0.3258 |
| 6 | 0.0000                    | 0.0000  | -0.5227 | 0.0696  | -0.2820 | 0.1321  | 0.3251   | 0.0794  | 0.4088  | 0.2807  | 1.0421  | 0.1587  |
| 1 | 0.0000                    | 0.9370  | -1.1200 | 0.0809  | 0.0860  | 0.0416  | 0.0291   | 0.0990  | -0.0022 | 0.0980  | 0.0308  | 0.0836  |
| 1 | 0.0000                    | -0.9370 | -1.1200 | 0.0809  | 0.0860  | 0.0416  | 0.0291   | 0.0990  | -0.0022 | 0.0980  | 0.0308  | 0.0836  |

Dipole mement (in D) 2.31 (DEN) 1.79 0.14 1.47 2.37 2.16 2.31 3.30 6.51 2.35

-----  
 File TZVPMol096.out  
 Molecule PMol096 acetaldehyde  
 SP Mol096 B3LYP/Def2TZVP VAC.  
 0 7

Dipole -2.7968 -0.3617 0.0000 2.8201  
 Quadrupole -2.1022 0.9962 1.1060 -0.7782 0.0000 0.0000

|   | Atomic coordinates (in A) |         |         | Mul.    | Lowdin  | Hirsch. | I-Hirsch | CM5     | ESP     | NPA     | AIM     | ACP     |
|---|---------------------------|---------|---------|---------|---------|---------|----------|---------|---------|---------|---------|---------|
| 1 | -0.3788                   | -1.6540 | 0.0000  | 0.1173  | 0.1270  | 0.0470  | 0.1483   | 0.1018  | 0.1118  | 0.2265  | 0.0432  | 0.0911  |
| 6 | -0.9247                   | -0.7152 | 0.0000  | -0.2716 | -0.2925 | -0.0825 | -0.5098  | -0.2271 | -0.3311 | -0.7054 | -0.0301 | -0.2495 |
| 6 | 0.0000                    | 0.4562  | 0.0000  | 0.1211  | -0.3249 | 0.1462  | 0.5088   | 0.1277  | 0.5661  | 0.4345  | 1.0365  | 0.2440  |
| 8 | 1.1994                    | 0.3870  | 0.0000  | -0.2589 | 0.1167  | -0.2409 | -0.4401  | -0.2973 | -0.4825 | -0.5034 | -1.1295 | -0.3550 |
| 1 | -1.5795                   | -0.6684 | 0.8713  | 0.1200  | 0.1348  | 0.0492  | 0.1417   | 0.1014  | 0.0933  | 0.2291  | 0.0335  | 0.1011  |
| 1 | -1.5795                   | -0.6684 | -0.8713 | 0.1200  | 0.1348  | 0.0492  | 0.1417   | 0.1014  | 0.0933  | 0.2291  | 0.0335  | 0.1011  |
| 1 | -0.5090                   | 1.4489  | 0.0000  | 0.0520  | 0.1041  | 0.0318  | 0.0093   | 0.0920  | -0.0510 | 0.0896  | 0.0128  | 0.0673  |

Dipole moment (in D) 2.82 (DEN) 2.52 0.85 1.96 2.71 2.67 2.83 3.88 6.99 2.81

-----  
File TZVPMol097.out

Molecule PMol097 propanal  
SP Mol097 B3LYP/Def2TZVP VAC.  
0 10

Dipole -1.6270 2.1869 0.0000 2.7257

Quadrupole -1.7094 0.2552 1.4542 2.5263 -0.0003 0.0003

|   | Atomic coordinates (in A) |         |         | Mul.    | Lowdin  | Hirsch. | I-Hirsch | CM5     | ESP     | NPA     | AIM     | ACP     |
|---|---------------------------|---------|---------|---------|---------|---------|----------|---------|---------|---------|---------|---------|
| 6 | -1.4318                   | -0.4975 | -0.0000 | -0.3256 | -0.3007 | -0.0829 | -0.3284  | -0.2329 | -0.1750 | -0.5941 | 0.0231  | -0.2503 |
| 6 | -0.5427                   | 0.7239  | 0.0000  | -0.1214 | -0.2927 | -0.0469 | -0.2998  | -0.1524 | 0.1043  | -0.5009 | 0.0050  | -0.1389 |
| 6 | 0.9232                    | 0.4199  | -0.0002 | 0.0907  | -0.3008 | 0.1436  | 0.4802   | 0.1265  | 0.4497  | 0.4392  | 1.0234  | 0.2403  |
| 8 | 1.3956                    | -0.6854 | 0.0001  | -0.2647 | 0.1198  | -0.2355 | -0.4342  | -0.2929 | -0.4610 | -0.5119 | -1.1333 | -0.3481 |
| 1 | -2.4843                   | -0.2225 | 0.0002  | 0.1114  | 0.1184  | 0.0320  | 0.1082   | 0.0836  | 0.0450  | 0.2051  | 0.0000  | 0.0856  |
| 1 | -1.2442                   | -1.1188 | -0.8737 | 0.1155  | 0.1245  | 0.0347  | 0.1175   | 0.0885  | 0.0523  | 0.2126  | 0.0163  | 0.0794  |
| 1 | -1.2440                   | -1.1190 | 0.8735  | 0.1155  | 0.1245  | 0.0347  | 0.1175   | 0.0885  | 0.0522  | 0.2126  | 0.0164  | 0.0794  |
| 1 | -0.7334                   | 1.3733  | -0.8616 | 0.1062  | 0.1496  | 0.0446  | 0.1170   | 0.0998  | -0.0095 | 0.2221  | 0.0194  | 0.0929  |
| 1 | -0.7332                   | 1.3731  | 0.8619  | 0.1062  | 0.1497  | 0.0446  | 0.1170   | 0.0998  | -0.0093 | 0.2221  | 0.0195  | 0.0929  |
| 1 | 1.5823                    | 1.3196  | 0.0003  | 0.0662  | 0.1077  | 0.0311  | 0.0050   | 0.0914  | -0.0488 | 0.0930  | 0.0106  | 0.0669  |

Dipole moment (in D) 2.73 (DEN) 2.58 0.84 1.86 2.64 2.56 2.71 3.80 6.86 2.77

-----  
File TZVPMol098.out

Molecule PMol098 butanal  
SP Mol098 B3LYP/Def2TZVP VAC.  
0 13

Dipole -2.8033 0.5159 0.9983 3.0201

Quadrupole -6.0682 2.8805 3.1877 1.0474 2.2975 -0.0998

|   | Atomic coordinates (in A) |         |         | Mul.    | Lowdin  | Hirsch. | I-Hirsch | CM5     | ESP     | NPA     | AIM     | ACP     |
|---|---------------------------|---------|---------|---------|---------|---------|----------|---------|---------|---------|---------|---------|
| 6 | 0.1169                    | -0.4423 | 0.2272  | -0.1009 | -0.2550 | -0.0510 | -0.3521  | -0.1554 | -0.1406 | -0.4966 | 0.0031  | -0.1485 |
| 6 | -1.0217                   | 0.4999  | -0.1495 | -0.1870 | -0.2864 | -0.0399 | -0.1057  | -0.1521 | 0.2286  | -0.3775 | 0.0525  | -0.1335 |
| 1 | -0.0594                   | -0.8226 | 1.2406  | 0.0966  | 0.1510  | 0.0440  | 0.1211   | 0.1003  | 0.0499  | 0.2186  | 0.0169  | 0.0900  |
| 1 | 0.1652                    | -1.3082 | -0.4338 | 0.0976  | 0.1419  | 0.0412  | 0.1259   | 0.0997  | 0.0536  | 0.2149  | 0.0268  | 0.0806  |
| 6 | -2.3811                   | -0.1642 | -0.0592 | -0.3235 | -0.3056 | -0.0805 | -0.3249  | -0.2324 | -0.2858 | -0.5833 | 0.0176  | -0.2452 |
| 1 | -0.9913                   | 1.3788  | 0.5004  | 0.0904  | 0.1334  | 0.0291  | 0.0834   | 0.0844  | -0.0404 | 0.1946  | -0.0100 | 0.0780  |
| 1 | -0.8572                   | 0.8762  | -1.1620 | 0.1022  | 0.1360  | 0.0321  | 0.0905   | 0.0875  | -0.0223 | 0.1982  | -0.0039 | 0.0791  |
| 1 | -3.1824                   | 0.5176  | -0.3391 | 0.1165  | 0.1191  | 0.0332  | 0.1045   | 0.0846  | 0.0701  | 0.2071  | 0.0022  | 0.0870  |
| 1 | -2.4444                   | -1.0306 | -0.7178 | 0.1091  | 0.1193  | 0.0315  | 0.1052   | 0.0833  | 0.0677  | 0.1996  | -0.0014 | 0.0839  |
| 1 | -2.5856                   | -0.5134 | 0.9534  | 0.1041  | 0.1177  | 0.0299  | 0.1023   | 0.0817  | 0.0662  | 0.1967  | -0.0050 | 0.0823  |
| 6 | 1.4465                    | 0.2459  | 0.2439  | 0.1034  | -0.2971 | 0.1436  | 0.4914   | 0.1270  | 0.4386  | 0.4462  | 1.0269  | 0.2394  |
| 8 | 2.4419                    | -0.1416 | -0.3055 | -0.2547 | 0.1190  | -0.2422 | -0.4462  | -0.2985 | -0.4559 | -0.5041 | -1.1327 | -0.3561 |
| 1 | 1.4564                    | 1.1994  | 0.8280  | 0.0465  | 0.1066  | 0.0290  | 0.0046   | 0.0898  | -0.0296 | 0.0854  | 0.0076  | 0.0631  |

Dipole moment (in D) 3.02 (DEN) 2.64 1.03 2.18 2.91 2.90 3.03 4.00 7.28 2.99

File TZVPMol099.out  
Molecule PMol099 E-2-butenal  
SP Mol099 B3LYP/Def2TZVP VAC.  
0 11

|                      |                           |         |         |         |         |         |          |         |         |         |         |         |
|----------------------|---------------------------|---------|---------|---------|---------|---------|----------|---------|---------|---------|---------|---------|
| Dipole               | 4.0903                    | 0.9260  | -0.0002 | 4.1938  |         |         |          |         |         |         |         |         |
| Quadrupole           | -4.5767                   | 3.5276  | 1.0492  | -1.6426 | 0.0006  | 0.0001  |          |         |         |         |         |         |
|                      | Atomic coordinates (in A) |         |         | Mul.    | Lowdin  | Hirsch. | I-Hirsch | CM5     | ESP     | NPA     | AIM     | ACP     |
| 8                    | -2.4600                   | -0.2396 | 0.0001  | -0.2768 | 0.1049  | -0.2545 | -0.4516  | -0.3081 | -0.4722 | -0.5094 | -1.1251 | -0.3672 |
| 6                    | -1.3916                   | 0.3243  | -0.0001 | 0.1018  | -0.3097 | 0.1181  | 0.4440   | 0.1056  | 0.5172  | 0.3827  | 1.0186  | 0.2090  |
| 1                    | -1.3290                   | 1.4394  | 0.0001  | 0.0474  | 0.1094  | 0.0269  | 0.0044   | 0.0882  | -0.0365 | 0.0901  | 0.0058  | 0.0581  |
| 6                    | -0.0924                   | -0.3346 | -0.0000 | -0.0959 | -0.1677 | -0.0514 | -0.2962  | -0.1066 | -0.3900 | -0.3141 | -0.0467 | -0.0961 |
| 1                    | -0.0821                   | -1.4198 | -0.0000 | 0.1137  | 0.1455  | 0.0487  | 0.1349   | 0.1072  | 0.1953  | 0.2089  | 0.0530  | 0.0837  |
| 6                    | 1.0358                    | 0.3816  | -0.0000 | -0.0642 | -0.1447 | 0.0087  | 0.0849   | -0.0548 | 0.0575  | -0.0748 | -0.0335 | -0.0251 |
| 6                    | 2.4125                    | -0.1571 | 0.0000  | -0.3166 | -0.2788 | -0.0739 | -0.3882  | -0.2210 | -0.2344 | -0.6391 | 0.0180  | -0.2388 |
| 1                    | 0.9362                    | 1.4665  | -0.0000 | 0.1150  | 0.1450  | 0.0431  | 0.0837   | 0.0996  | 0.0885  | 0.1913  | 0.0336  | 0.0879  |
| 1                    | 2.4293                    | -1.2446 | 0.0000  | 0.1204  | 0.1282  | 0.0427  | 0.1269   | 0.0953  | 0.0924  | 0.2143  | 0.0211  | 0.0945  |
| 1                    | 2.9696                    | 0.1948  | -0.8704 | 0.1276  | 0.1339  | 0.0457  | 0.1285   | 0.0972  | 0.0911  | 0.2250  | 0.0275  | 0.0970  |
| 1                    | 2.9695                    | 0.1948  | 0.8704  | 0.1276  | 0.1339  | 0.0457  | 0.1285   | 0.0972  | 0.0911  | 0.2250  | 0.0275  | 0.0970  |
| Dipole mement (in D) | 4.19 (DEN)                |         | 3.91    | 2.17    | 3.29    | 4.09    | 3.99     | 4.20    | 5.23    | 8.14    | 4.10    |         |

-----  
File TZVPMol100.out  
Molecule PMol100 acetone  
SP Mol100 B3LYP/Def2TZVP VAC.  
0 10

|                      |                           |         |         |         |         |         |          |         |         |         |         |         |
|----------------------|---------------------------|---------|---------|---------|---------|---------|----------|---------|---------|---------|---------|---------|
| Dipole               | 0.0000                    | 0.0000  | -3.0256 | 3.0256  |         |         |          |         |         |         |         |         |
| Quadrupole           | 1.4182                    | 1.9245  | -3.3428 | 0.0000  | 0.0000  | 0.0000  |          |         |         |         |         |         |
|                      | Atomic coordinates (in A) |         |         | Mul.    | Lowdin  | Hirsch. | I-Hirsch | CM5     | ESP     | NPA     | AIM     | ACP     |
| 8                    | 0.0000                    | 0.0000  | 1.3970  | -0.2818 | 0.1282  | -0.2581 | -0.4817  | -0.3091 | -0.5432 | -0.5222 | -1.1465 | -0.3757 |
| 6                    | 0.0000                    | 0.0000  | 0.1888  | 0.2014  | -0.3860 | 0.1689  | 0.6851   | 0.1846  | 0.7789  | 0.5742  | 1.0294  | 0.3388  |
| 6                    | 0.0000                    | 1.2757  | -0.6110 | -0.3215 | -0.2651 | -0.0873 | -0.5304  | -0.2305 | -0.5326 | -0.7016 | -0.0298 | -0.2585 |
| 6                    | 0.0000                    | -1.2757 | -0.6110 | -0.3215 | -0.2651 | -0.0873 | -0.5304  | -0.2305 | -0.5326 | -0.7016 | -0.0298 | -0.2585 |
| 1                    | 0.0000                    | 2.1423  | 0.0422  | 0.1273  | 0.1289  | 0.0441  | 0.1471   | 0.0995  | 0.1441  | 0.2296  | 0.0408  | 0.0870  |
| 1                    | 0.0000                    | -2.1423 | 0.0422  | 0.1273  | 0.1289  | 0.0441  | 0.1471   | 0.0995  | 0.1441  | 0.2296  | 0.0408  | 0.0870  |
| 1                    | 0.8719                    | 1.3148  | -1.2651 | 0.1172  | 0.1326  | 0.0439  | 0.1408   | 0.0967  | 0.1354  | 0.2230  | 0.0238  | 0.0950  |
| 1                    | 0.8719                    | -1.3148 | -1.2651 | 0.1172  | 0.1326  | 0.0439  | 0.1408   | 0.0967  | 0.1354  | 0.2230  | 0.0238  | 0.0950  |
| 1                    | -0.8719                   | 1.3148  | -1.2651 | 0.1172  | 0.1326  | 0.0439  | 0.1408   | 0.0967  | 0.1353  | 0.2230  | 0.0238  | 0.0950  |
| 1                    | -0.8719                   | -1.3148 | -1.2651 | 0.1172  | 0.1326  | 0.0439  | 0.1408   | 0.0967  | 0.1353  | 0.2230  | 0.0238  | 0.0950  |
| Dipole mement (in D) | 3.03 (DEN)                |         | 2.62    | 1.10    | 2.12    | 2.86    | 2.86     | 3.04    | 4.19    | 7.15    | 2.97    |         |

-----  
File TZVPMol101.out  
Molecule PMol101 2-butanone  
SP Mol101 B3LYP/Def2TZVP VAC.  
0 13

|        |        |         |        |        |  |  |  |  |  |  |  |  |
|--------|--------|---------|--------|--------|--|--|--|--|--|--|--|--|
| Dipole | 2.8069 | -0.6948 | 0.0000 | 2.8916 |  |  |  |  |  |  |  |  |
|--------|--------|---------|--------|--------|--|--|--|--|--|--|--|--|

```

Quadrupole      -2.1292   0.6795   1.4498   2.4823   0.0000   0.0000
Atomic coordinates (in A)      Mul.      Lowdin      Hirsch.      I-Hirsch      CM5      ESP      NPA      AIM      ACP
6      -0.6000  -1.9097   0.0000  -0.3085  -0.3002  -0.0852  -0.3251  -0.2352  -0.2509  -0.5885  0.0258  -0.2521
6      0.5009   -0.8747   0.0000  -0.1754  -0.2637  -0.0506  -0.3188  -0.1547  0.0256  -0.4953  0.0063  -0.1471
6      0.0000   0.5518   0.0000  0.1965  -0.3580  0.1679  0.6564  0.1850  0.6416  0.5802  1.0142  0.3364
8     -1.1796   0.8158   0.0000  -0.2898  0.1329  -0.2494  -0.4726  -0.3017  -0.5247  -0.5300  -1.1483  -0.3653
1      1.1641  -0.9928   0.8630  0.1038  0.1474  0.0398  0.1176  0.0957  0.0084  0.2162  0.0101  0.0873
1      1.1641  -0.9928  -0.8630  0.1038  0.1474  0.0398  0.1176  0.0957  0.0084  0.2162  0.0101  0.0873
1     -1.2403  -1.8007  -0.8730  0.1128  0.1238  0.0327  0.1160  0.0868  0.0698  0.2115  0.0145  0.0768
1     -1.2403  -1.8007  0.8730  0.1128  0.1238  0.0327  0.1160  0.0868  0.0698  0.2115  0.0145  0.0768
1     -0.1953  -2.9197   0.0000  0.1076  0.1167  0.0295  0.1048  0.0812  0.0658  0.2020  -0.0047  0.0829
6      1.0595   1.6216   0.0000  -0.3324  -0.2640  -0.0877  -0.5347  -0.2311  -0.4946  -0.6995  -0.0300  -0.2587
1      1.7060   1.5187  -0.8721  0.1194  0.1325  0.0435  0.1381  0.0962  0.1188  0.2231  0.0232  0.0947
1      1.7060   1.5187  0.8721  0.1194  0.1325  0.0435  0.1381  0.0962  0.1188  0.2231  0.0232  0.0947
1      0.6107   2.6097   0.0000  0.1300  0.1288  0.0436  0.1467  0.0990  0.1433  0.2293  0.0401  0.0865

Dipole mement (in D)   2.89 (DEN)   2.57   0.79   2.00   2.75   2.73   2.89   4.09   6.96   2.95

```

-----  
File TZVPMol102.out

Molecule PMol102 cyclopentanone  
SP Mol102 B3LYP/Def2TZVP VAC.  
0 14

```

Dipole      0.0000   0.0000  -3.1750   3.1750
Quadrupole  3.2492   3.2995  -6.5487  -0.2087   0.0000   0.0000
Atomic coordinates (in A)      Mul.      Lowdin      Hirsch.      I-Hirsch      CM5      ESP      NPA      AIM      ACP
6      0.0000   0.0000   0.9196   0.1390  -0.3185  0.1644  0.6471  0.1857  0.5691  0.5935  1.0303  0.3253
6      0.0000   1.2293   0.0260  -0.1735  -0.2180  -0.0558  -0.3733  -0.1573  -0.1836  -0.5136  -0.0168  -0.1605
6      0.0000  -1.2293   0.0260  -0.1735  -0.2180  -0.0558  -0.3733  -0.1573  -0.1808  -0.5136  -0.0166  -0.1605
6     -0.3072  -0.7014  -1.3681  -0.1801  -0.2490  -0.0480  -0.1458  -0.1567  -0.0191  -0.3880  0.0331  -0.1479
6     0.3072   0.7014  -1.3681  -0.1801  -0.2490  -0.0480  -0.1458  -0.1567  -0.0164  -0.3880  0.0340  -0.1479
1     -1.0071   1.6545   0.0723  0.1083  0.1537  0.0457  0.1287  0.1027  0.0749  0.2284  0.0250  0.0887
1      1.0071  -1.6545   0.0723  0.1083  0.1537  0.0457  0.1287  0.1027  0.0746  0.2284  0.0250  0.0887
1      0.6736   1.9945   0.4059  0.1178  0.1427  0.0446  0.1295  0.1014  0.0614  0.2330  0.0320  0.0877
1     -0.6736  -1.9945   0.4059  0.1178  0.1427  0.0446  0.1295  0.1014  0.0607  0.2330  0.0320  0.0877
1      0.0738  -1.3341  -2.1675  0.1016  0.1297  0.0331  0.0943  0.0876  0.0169  0.2089  0.0010  0.0839
1     -0.0738  1.3341  -2.1675  0.1016  0.1297  0.0331  0.0943  0.0876  0.0168  0.2089  0.0010  0.0839
1     -1.3882  -0.6304  -1.5098  0.0928  0.1353  0.0301  0.0918  0.0858  0.0294  0.1943  -0.0096  0.0777
1      1.3882   0.6304  -1.5098  0.0928  0.1353  0.0301  0.0918  0.0858  0.0281  0.1943  -0.0096  0.0777
8      0.0000   0.0000   2.1232  -0.2728  0.1293  -0.2641  -0.4980  -0.3129  -0.5319  -0.5197  -1.1604  -0.3849

Dipole mement (in D)   3.17 (DEN)   2.77   0.87   2.27   3.10   2.95   3.20   3.81   7.47   3.06

```

-----  
File TZVPMol103.out

Molecule PMol103 acetophenone  
SP Mol103 B3LYP/Def2TZVP VAC.  
0 17

|                      |                           |         |         |         |         |         |          |         |         |         |         |         |
|----------------------|---------------------------|---------|---------|---------|---------|---------|----------|---------|---------|---------|---------|---------|
| Dipole               | -1.9400                   | 2.4872  | 0.0001  | 3.1543  |         |         |          |         |         |         |         |         |
| Quadrupole           | 1.1214                    | 1.5348  | -2.6562 | 6.6346  | 0.0003  | 0.0000  |          |         |         |         |         |         |
|                      | Atomic coordinates (in A) |         |         | Mul.    | Lowdin  | Hirsch. | I-Hirsch | CM5     | ESP     | NPA     | AIM     | ACP     |
| 6                    | -0.4247                   | 1.1851  | 0.0000  | -0.1787 | -0.0983 | -0.0313 | -0.0757  | -0.0849 | -0.1487 | -0.1732 | -0.0340 | -0.0826 |
| 6                    | 0.2073                    | -0.0593 | 0.0000  | 0.0744  | -0.1258 | -0.0173 | -0.0999  | -0.0240 | 0.0053  | -0.1622 | -0.0370 | 0.0001  |
| 6                    | -0.5741                   | -1.2166 | -0.0000 | -0.1543 | -0.0740 | -0.0221 | -0.0643  | -0.0740 | -0.0742 | -0.1491 | -0.0168 | -0.0737 |
| 6                    | -1.9544                   | -1.1320 | -0.0000 | -0.0859 | -0.1319 | -0.0339 | -0.0993  | -0.0896 | -0.1310 | -0.2080 | -0.0194 | -0.0793 |
| 6                    | -2.5747                   | 0.1128  | -0.0000 | -0.0975 | -0.1232 | -0.0265 | -0.0644  | -0.0825 | -0.0757 | -0.1803 | -0.0241 | -0.0708 |
| 6                    | -1.8090                   | 1.2704  | -0.0000 | -0.1172 | -0.1365 | -0.0382 | -0.1041  | -0.0942 | -0.1157 | -0.2119 | -0.0217 | -0.0834 |
| 1                    | 0.1638                    | 2.0937  | 0.0000  | 0.1230  | 0.1483  | 0.0410  | 0.1017   | 0.0991  | 0.1161  | 0.2094  | 0.0334  | 0.0855  |
| 1                    | -0.0658                   | -2.1723 | -0.0000 | 0.1402  | 0.1562  | 0.0450  | 0.1128   | 0.1065  | 0.1077  | 0.2334  | 0.0774  | 0.0722  |
| 1                    | -2.5526                   | -2.0342 | -0.0000 | 0.1161  | 0.1447  | 0.0447  | 0.0985   | 0.1008  | 0.1161  | 0.2117  | 0.0364  | 0.0892  |
| 1                    | -3.6554                   | 0.1797  | -0.0001 | 0.1163  | 0.1442  | 0.0451  | 0.0964   | 0.1011  | 0.1080  | 0.2100  | 0.0361  | 0.0898  |
| 1                    | -2.2908                   | 2.2396  | -0.0000 | 0.1138  | 0.1439  | 0.0431  | 0.0973   | 0.0992  | 0.1124  | 0.2108  | 0.0341  | 0.0876  |
| 6                    | 1.6910                    | -0.2048 | 0.0001  | 0.2231  | -0.3148 | 0.1572  | 0.6070   | 0.1810  | 0.4843  | 0.5526  | 1.0074  | 0.3172  |
| 8                    | 2.2074                    | -1.3033 | -0.0000 | -0.2982 | 0.1291  | -0.2512 | -0.4850  | -0.3024 | -0.4806 | -0.5280 | -1.1381 | -0.3639 |
| 6                    | 2.5277                    | 1.0467  | 0.0000  | -0.3665 | -0.2595 | -0.0876 | -0.5470  | -0.2305 | -0.2690 | -0.6979 | -0.0265 | -0.2598 |
| 1                    | 2.3135                    | 1.6618  | -0.8745 | 0.1281  | 0.1335  | 0.0437  | 0.1376   | 0.0969  | 0.0760  | 0.2246  | 0.0251  | 0.0926  |
| 1                    | 2.3136                    | 1.6618  | 0.8746  | 0.1281  | 0.1335  | 0.0437  | 0.1376   | 0.0969  | 0.0760  | 0.2246  | 0.0251  | 0.0926  |
| 1                    | 3.5798                    | 0.7821  | 0.0000  | 0.1352  | 0.1307  | 0.0445  | 0.1506   | 0.1004  | 0.0932  | 0.2334  | 0.0430  | 0.0868  |
| Dipole moment (in D) | 3.15 (DEN)                |         | 2.35    | 0.98    | 2.25    | 3.23    | 2.90     | 3.17    | 4.23    | 7.01    | 3.11    |         |

-----  
File TZVPMol104.out  
Molecule PMol104 cyclobutane-1,2-dione  
SP Mol104 B3LYP/Def2TZVP VAC.  
0 10

|                      |                           |         |         |         |         |         |          |         |         |         |         |         |
|----------------------|---------------------------|---------|---------|---------|---------|---------|----------|---------|---------|---------|---------|---------|
| Dipole               | -3.7181                   | -1.3874 | 0.0000  | 3.9685  |         |         |          |         |         |         |         |         |
| Quadrupole           | -0.9540                   | -3.6032 | 4.5572  | 1.1481  | 0.0000  | 0.0000  |          |         |         |         |         |         |
|                      | Atomic coordinates (in A) |         |         | Mul.    | Lowdin  | Hirsch. | I-Hirsch | CM5     | ESP     | NPA     | AIM     | ACP     |
| 8                    | 1.6272                    | -1.1366 | 0.0000  | -0.2013 | 0.1883  | -0.2065 | -0.3939  | -0.2503 | -0.4248 | -0.4390 | -1.1102 | -0.3314 |
| 6                    | 0.5486                    | -0.6327 | 0.0000  | 0.1248  | -0.2779 | 0.1584  | 0.4646   | 0.1909  | 0.4374  | 0.4808  | 1.0533  | 0.2986  |
| 6                    | -0.8931                   | -1.1526 | 0.0000  | -0.1687 | -0.2004 | -0.0569 | -0.3563  | -0.1567 | -0.2011 | -0.5167 | -0.0372 | -0.1641 |
| 6                    | 0.0000                    | 0.8374  | 0.0000  | 0.1249  | -0.2779 | 0.1584  | 0.4646   | 0.1909  | 0.4286  | 0.4808  | 1.0525  | 0.2986  |
| 6                    | -1.4298                   | 0.2857  | 0.0000  | -0.1689 | -0.2004 | -0.0568 | -0.3563  | -0.1567 | -0.1933 | -0.5167 | -0.0373 | -0.1641 |
| 1                    | -1.1271                   | -1.7498 | 0.8795  | 0.1227  | 0.1450  | 0.0525  | 0.1428   | 0.1080  | 0.0946  | 0.2375  | 0.0473  | 0.0985  |
| 1                    | -1.1271                   | -1.7498 | -0.8795 | 0.1227  | 0.1450  | 0.0525  | 0.1428   | 0.1080  | 0.0946  | 0.2375  | 0.0473  | 0.0985  |
| 1                    | -1.9979                   | 0.5837  | -0.8795 | 0.1227  | 0.1450  | 0.0525  | 0.1428   | 0.1080  | 0.0932  | 0.2375  | 0.0473  | 0.0985  |
| 1                    | -1.9979                   | 0.5837  | 0.8795  | 0.1227  | 0.1450  | 0.0525  | 0.1428   | 0.1080  | 0.0932  | 0.2375  | 0.0473  | 0.0985  |
| 8                    | 0.4848                    | 1.9247  | 0.0000  | -0.2013 | 0.1883  | -0.2065 | -0.3939  | -0.2503 | -0.4224 | -0.4390 | -1.1102 | -0.3314 |
| Dipole moment (in D) | 3.97 (DEN)                |         | 3.75    | 1.00    | 2.79    | 3.29    | 3.77     | 4.03    | 4.86    | 10.13   | 3.95    |         |

-----  
File TZVPMol105.out  
Molecule PMol105 cyclobutanone  
SP Mol105 B3LYP/Def2TZVP VAC.



```

0 11
Dipole      0.0000  0.0000 -3.0180  3.0180
Quadrupole  3.0198  2.4778 -5.4976  0.0000  0.0000  0.0000
  Atomic coordinates (in A)      Mul.      Lowdin      Hirsch.      I-Hirsch      CM5      ESP      NPA      AIM      ACP
8      0.0000  0.0000  1.8675  -0.2539  0.1412  -0.2536  -0.4837  -0.2995  -0.5400  -0.4987  -1.1583  -0.3767
6      0.0000  0.0000  0.6710  0.1317  -0.3250  0.1629  0.6370  0.1873  0.6644  0.5972  1.0668  0.3186
6      0.0000  1.0973  -0.3818  -0.1630  -0.2010  -0.0563  -0.3622  -0.1570  -0.3120  -0.5180  -0.0408  -0.1624
6      0.0000  -1.0973  -0.3818  -0.1630  -0.2010  -0.0563  -0.3622  -0.1570  -0.3120  -0.5180  -0.0408  -0.1624
6      0.0000  0.0000  -1.4662  -0.1972  -0.2316  -0.0494  -0.1457  -0.1563  0.1532  -0.3916  0.0208  -0.1519
1      0.8784  1.7417  -0.3444  0.1111  0.1411  0.0465  0.1299  0.1017  0.0911  0.2300  0.0348  0.0917
1     -0.8784  1.7417  -0.3444  0.1111  0.1411  0.0465  0.1299  0.1017  0.0895  0.2300  0.0348  0.0917
1     -0.8784  -1.7417  -0.3444  0.1111  0.1411  0.0465  0.1299  0.1017  0.0895  0.2300  0.0348  0.0917
1      0.8784  -1.7417  -0.3444  0.1111  0.1411  0.0465  0.1299  0.1017  0.0911  0.2300  0.0348  0.0917
1     -0.8791  0.0000  -2.1052  0.1005  0.1266  0.0333  0.0987  0.0879  -0.0081  0.2045  0.0069  0.0840
1      0.8791  0.0000  -2.1052  0.1005  0.1266  0.0333  0.0987  0.0879  -0.0068  0.2045  0.0069  0.0840

Dipole mement (in D)  3.02 (DEN)  2.63  0.91  2.18  2.79  2.86  3.08  3.55  7.32  2.99

```

-----  
File TZVPMol106.out

Molecule PMol106 cyclopropanone  
SP Mol106 B3LYP/Def2TZVP VAC.

```

0 8
Dipole      0.0000  2.9679  0.0000  2.9679
Quadrupole  2.7264 -3.9929  1.2665  0.0000  0.0000  0.0000
  Atomic coordinates (in A)      Mul.      Lowdin      Hirsch.      I-Hirsch      CM5      ESP      NPA      AIM      ACP
8     -0.0000  -1.5738  0.0000  -0.2348  0.1557  -0.2335  -0.4555  -0.2771  -0.4672  -0.4660  -1.1200  -0.3554
6      0.0000  -0.3800  0.0000  0.1803  -0.3208  0.1576  0.6327  0.1834  0.5656  0.5824  1.0488  0.3068
6      0.0000  0.8535  0.7776  -0.2213  -0.1956  -0.0708  -0.3940  -0.1719  -0.3592  -0.5230  -0.0849  -0.1814
6      0.0000  0.8535  -0.7776  -0.2213  -0.1956  -0.0708  -0.3940  -0.1719  -0.3592  -0.5230  -0.0849  -0.1814
1     -0.9076  1.1572  1.2836  0.1243  0.1391  0.0544  0.1527  0.1094  0.1547  0.2324  0.0603  0.1029
1     -0.9076  1.1572  -1.2836  0.1243  0.1391  0.0544  0.1527  0.1094  0.1547  0.2324  0.0603  0.1029
1      0.9076  1.1572  1.2836  0.1243  0.1391  0.0544  0.1527  0.1094  0.1553  0.2324  0.0603  0.1029
1      0.9076  1.1572  -1.2836  0.1243  0.1391  0.0544  0.1527  0.1094  0.1553  0.2324  0.0603  0.1029

Dipole mement (in D)  2.97 (DEN)  2.39  0.90  2.11  2.45  2.78  3.00  3.34  7.20  2.93

```

-----  
File TZVPMol107.out

Molecule PMol107 cyclopentadienone  
SP Mol107 B3LYP/Def2TZVP VAC.

```

0 10
Dipole      0.0000  0.0000 -3.2789  3.2789
Quadrupole -1.4797  3.9683 -2.4885  0.0000  0.0000  0.0000
  Atomic coordinates (in A)      Mul.      Lowdin      Hirsch.      I-Hirsch      CM5      ESP      NPA      AIM      ACP
6      0.0000  0.0000  0.8182  0.2666  -0.2865  0.1510  0.5899  0.1825  0.7717  0.5009  1.0349  0.3006
6      0.0000  1.1971  -0.0874  -0.2038  -0.1144  -0.0535  -0.2982  -0.1047  -0.4094  -0.2906  -0.0600  -0.1077
6      0.0000  0.7458  -1.3418  -0.0736  -0.1039  -0.0173  -0.0329  -0.0720  -0.0456  -0.1686  -0.0411  -0.0623

```

|   |        |         |         |         |         |         |         |         |         |         |         |         |
|---|--------|---------|---------|---------|---------|---------|---------|---------|---------|---------|---------|---------|
| 1 | 0.0000 | 1.3380  | -2.2459 | 0.1351  | 0.1382  | 0.0538  | 0.1117  | 0.1090  | 0.1345  | 0.2137  | 0.0590  | 0.0995  |
| 6 | 0.0000 | -1.1971 | -0.0874 | -0.2038 | -0.1144 | -0.0535 | -0.2982 | -0.1047 | -0.4094 | -0.2906 | -0.0600 | -0.1077 |
| 6 | 0.0000 | -0.7458 | -1.3418 | -0.0736 | -0.1039 | -0.0173 | -0.0329 | -0.0720 | -0.0456 | -0.1686 | -0.0412 | -0.0623 |
| 1 | 0.0000 | 2.2147  | 0.2673  | 0.1322  | 0.1401  | 0.0552  | 0.1431  | 0.1121  | 0.1836  | 0.2254  | 0.0746  | 0.0940  |
| 1 | 0.0000 | -1.3380 | -2.2459 | 0.1351  | 0.1382  | 0.0538  | 0.1117  | 0.1090  | 0.1345  | 0.2137  | 0.0590  | 0.0995  |
| 1 | 0.0000 | -2.2147 | 0.2673  | 0.1322  | 0.1401  | 0.0552  | 0.1431  | 0.1121  | 0.1836  | 0.2254  | 0.0746  | 0.0940  |
| 8 | 0.0000 | 0.0000  | 2.0248  | -0.2467 | 0.1663  | -0.2273 | -0.4373 | -0.2713 | -0.4978 | -0.4607 | -1.1000 | -0.3476 |

Dipole moment (in D) 3.28 (DEN) 2.81 0.70 2.37 3.30 2.97 3.31 4.13 7.13 3.21

-----  
File TZVPMol108.out

Molecule PMol108 4-cyclopentene-1,3-dione

SP Mol108 B3LYP/Def2TZVP VAC.

0 11

Dipole 0.0000 0.0000 -1.7546 1.7546  
 Quadrupole 4.4673 -12.6119 8.1445 0.0000 0.0000 0.0000

|   | Atomic coordinates (in A) |         |         | Mul.    | Lowdin  | Hirsch. | I-Hirsch | CM5     | ESP     | NPA     | AIM     | ACP     |
|---|---------------------------|---------|---------|---------|---------|---------|----------|---------|---------|---------|---------|---------|
| 6 | 0.0000                    | 0.0000  | 1.0776  | -0.1318 | -0.1608 | -0.0593 | -0.5788  | -0.1517 | -0.4884 | -0.6039 | -0.0437 | -0.1722 |
| 1 | -0.8722                   | 0.0000  | 1.7306  | 0.1344  | 0.1635  | 0.0643  | 0.1766   | 0.1227  | 0.1639  | 0.2587  | 0.0708  | 0.1022  |
| 1 | 0.8722                    | 0.0000  | 1.7306  | 0.1344  | 0.1635  | 0.0643  | 0.1766   | 0.1227  | 0.1644  | 0.2587  | 0.0708  | 0.1022  |
| 6 | 0.0000                    | 1.1955  | 0.1483  | 0.1580  | -0.3146 | 0.1523  | 0.5999   | 0.1797  | 0.6379  | 0.5204  | 1.0415  | 0.3059  |
| 6 | 0.0000                    | -1.1955 | 0.1483  | 0.1580  | -0.3146 | 0.1523  | 0.5999   | 0.1797  | 0.6379  | 0.5204  | 1.0415  | 0.3059  |
| 6 | 0.0000                    | -0.6690 | -1.2391 | -0.1190 | -0.0657 | -0.0089 | -0.1797  | -0.0595 | -0.2295 | -0.2185 | -0.0545 | -0.0617 |
| 6 | 0.0000                    | 0.6690  | -1.2391 | -0.1190 | -0.0657 | -0.0089 | -0.1797  | -0.0595 | -0.2295 | -0.2185 | -0.0546 | -0.0617 |
| 1 | 0.0000                    | -1.3272 | -2.0974 | 0.1494  | 0.1478  | 0.0662  | 0.1478   | 0.1232  | 0.1690  | 0.2291  | 0.0874  | 0.1052  |
| 1 | 0.0000                    | 1.3272  | -2.0974 | 0.1494  | 0.1478  | 0.0662  | 0.1478   | 0.1232  | 0.1690  | 0.2291  | 0.0874  | 0.1052  |
| 8 | 0.0000                    | 2.3608  | 0.4599  | -0.2569 | 0.1494  | -0.2442 | -0.4553  | -0.2904 | -0.4973 | -0.4876 | -1.1233 | -0.3655 |
| 8 | 0.0000                    | -2.3608 | 0.4599  | -0.2569 | 0.1494  | -0.2442 | -0.4553  | -0.2904 | -0.4973 | -0.4876 | -1.1233 | -0.3655 |

Dipole moment (in D) 1.75 (DEN) 0.95 0.10 1.33 2.06 1.55 1.76 2.25 3.64 1.76

-----  
File TZVPMol109.out

Molecule PMol109 3-cyclopentenone

SP Mol109 B3LYP/Def2TZVP VAC.

0 12

Dipole 0.0000 0.0000 -2.8131 2.8131  
 Quadrupole 1.2193 4.5715 -5.7908 0.0000 0.0000 0.0000

|   | Atomic coordinates (in A) |         |         | Mul.    | Lowdin  | Hirsch. | I-Hirsch | CM5     | ESP     | NPA     | AIM     | ACP     |
|---|---------------------------|---------|---------|---------|---------|---------|----------|---------|---------|---------|---------|---------|
| 6 | 0.0000                    | 0.0000  | 0.8513  | 0.1138  | -0.2932 | 0.1726  | 0.6611   | 0.1959  | 0.5048  | 0.6043  | 1.0458  | 0.3329  |
| 6 | 0.0000                    | 1.2334  | -0.0447 | -0.1161 | -0.2041 | -0.0563 | -0.3967  | -0.1526 | 0.0258  | -0.5477 | -0.0073 | -0.1600 |
| 6 | 0.0000                    | -1.2334 | -0.0447 | -0.1161 | -0.2041 | -0.0563 | -0.3967  | -0.1526 | 0.0258  | -0.5477 | -0.0076 | -0.1600 |
| 6 | 0.0000                    | -0.6658 | -1.4240 | -0.1591 | -0.1572 | -0.0429 | -0.0635  | -0.1022 | -0.2437 | -0.1813 | -0.0563 | -0.0859 |
| 6 | 0.0000                    | 0.6658  | -1.4240 | -0.1591 | -0.1572 | -0.0429 | -0.0635  | -0.1022 | -0.2437 | -0.1813 | -0.0563 | -0.0859 |
| 1 | -0.8690                   | 1.8577  | 0.1792  | 0.1150  | 0.1527  | 0.0490  | 0.1360   | 0.1054  | 0.0416  | 0.2371  | 0.0393  | 0.0898  |
| 1 | 0.8690                    | -1.8577 | 0.1792  | 0.1150  | 0.1527  | 0.0490  | 0.1360   | 0.1054  | 0.0431  | 0.2371  | 0.0393  | 0.0898  |
| 1 | 0.8690                    | 1.8577  | 0.1792  | 0.1150  | 0.1527  | 0.0490  | 0.1360   | 0.1054  | 0.0431  | 0.2371  | 0.0393  | 0.0898  |

|   |         |         |         |         |        |         |         |         |         |         |         |         |
|---|---------|---------|---------|---------|--------|---------|---------|---------|---------|---------|---------|---------|
| 1 | -0.8690 | -1.8577 | 0.1792  | 0.1150  | 0.1527 | 0.0490  | 0.1360  | 0.1054  | 0.0416  | 0.2371  | 0.0393  | 0.0898  |
| 1 | 0.0000  | -1.2812 | -2.3135 | 0.1185  | 0.1345 | 0.0434  | 0.1028  | 0.0986  | 0.1441  | 0.2084  | 0.0400  | 0.0893  |
| 1 | 0.0000  | 1.2812  | -2.3135 | 0.1185  | 0.1345 | 0.0434  | 0.1028  | 0.0986  | 0.1441  | 0.2084  | 0.0400  | 0.0893  |
| 8 | 0.0000  | 0.0000  | 2.0533  | -0.2606 | 0.1360 | -0.2570 | -0.4904 | -0.3055 | -0.5265 | -0.5113 | -1.1552 | -0.3787 |

Dipole mement (in D) 2.81 (DEN) 2.12 0.09 2.01 2.91 2.58 2.86 3.67 7.10 2.81

-----  
 File TZVPMol110.out  
 Molecule PMol110 cyclohexanone  
 SP Mol110 B3LYP/Def2TZVP VAC.  
 0 17

Dipole 2.1659 -2.5342 0.0000 3.3337  
 Quadrupole -0.1665 -3.6038 3.7703 5.0298 0.0000 0.0000

|   | Atomic coordinates (in A) |         |         | Mul.    | Lowdin  | Hirsch. | I-Hirsch | CM5     | ESP     | NPA     | AIM     | ACP     |
|---|---------------------------|---------|---------|---------|---------|---------|----------|---------|---------|---------|---------|---------|
| 6 | -0.4127                   | 1.0782  | 0.0000  | 0.1440  | -0.3283 | 0.1622  | 0.6407   | 0.1821  | 0.4962  | 0.5875  | 1.0045  | 0.3239  |
| 6 | 0.1553                    | 0.4936  | 1.2726  | -0.1578 | -0.2168 | -0.0546 | -0.3670  | -0.1563 | -0.1102 | -0.4976 | -0.0021 | -0.1585 |
| 6 | 0.1553                    | -1.0354 | 1.2530  | -0.1786 | -0.2526 | -0.0435 | -0.1350  | -0.1529 | 0.0611  | -0.3791 | 0.0416  | -0.1427 |
| 6 | 0.8266                    | -1.5757 | 0.0000  | -0.1749 | -0.2621 | -0.0481 | -0.1623  | -0.1582 | -0.1025 | -0.3885 | 0.0410  | -0.1459 |
| 6 | 0.1553                    | -1.0354 | -1.2530 | -0.1786 | -0.2526 | -0.0435 | -0.1350  | -0.1529 | 0.0611  | -0.3791 | 0.0417  | -0.1427 |
| 6 | 0.1553                    | 0.4936  | -1.2726 | -0.1578 | -0.2168 | -0.0546 | -0.3670  | -0.1563 | -0.1102 | -0.4976 | -0.0022 | -0.1585 |
| 1 | 0.6415                    | -1.4166 | 2.1519  | 0.1006  | 0.1346  | 0.0330  | 0.0929   | 0.0878  | 0.0001  | 0.2072  | -0.0028 | 0.0836  |
| 1 | 1.1900                    | 0.8459  | 1.3543  | 0.0930  | 0.1498  | 0.0395  | 0.1168   | 0.0964  | 0.0357  | 0.2140  | 0.0083  | 0.0847  |
| 1 | -0.3902                   | 0.8983  | 2.1230  | 0.1077  | 0.1423  | 0.0393  | 0.1230   | 0.0979  | 0.0360  | 0.2266  | 0.0276  | 0.0785  |
| 1 | 1.8839                    | -1.2896 | 0.0000  | 0.0821  | 0.1349  | 0.0268  | 0.0860   | 0.0825  | 0.0325  | 0.1881  | -0.0182 | 0.0739  |
| 1 | 0.8071                    | -2.6666 | 0.0000  | 0.1009  | 0.1353  | 0.0323  | 0.0880   | 0.0871  | 0.0203  | 0.2082  | -0.0054 | 0.0827  |
| 1 | 0.6415                    | -1.4166 | -2.1519 | 0.1006  | 0.1346  | 0.0330  | 0.0929   | 0.0878  | 0.0001  | 0.2072  | -0.0028 | 0.0836  |
| 1 | -0.8776                   | -1.3941 | -1.2930 | 0.0962  | 0.1380  | 0.0304  | 0.0898   | 0.0865  | 0.0090  | 0.1942  | -0.0087 | 0.0764  |
| 1 | 1.1900                    | 0.8459  | -1.3543 | 0.0930  | 0.1498  | 0.0395  | 0.1168   | 0.0964  | 0.0357  | 0.2140  | 0.0083  | 0.0847  |
| 1 | -0.3902                   | 0.8983  | -2.1230 | 0.1077  | 0.1423  | 0.0393  | 0.1230   | 0.0979  | 0.0360  | 0.2266  | 0.0276  | 0.0785  |
| 1 | -0.8776                   | -1.3941 | 1.2930  | 0.0962  | 0.1380  | 0.0304  | 0.0898   | 0.0865  | 0.0090  | 0.1942  | -0.0087 | 0.0764  |
| 8 | -1.2535                   | 1.9469  | 0.0000  | -0.2742 | 0.1295  | -0.2615 | -0.4935  | -0.3121 | -0.5102 | -0.5260 | -1.1505 | -0.3784 |

Dipole mement (in D) 3.33 (DEN) 2.86 1.10 2.40 3.34 3.12 3.35 4.23 7.56 3.22

-----  
 File TZVPMol111.out  
 Molecule PMol111 formic\_acid(s-cis)  
 SP Mol111 B3LYP/Def2TZVP VAC.  
 0 5

Dipole -1.4859 -0.3664 0.0000 1.5304  
 Quadrupole -4.8057 4.4672 0.3385 -0.0852 0.0000 0.0000

|   | Atomic coordinates (in A) |         |        | Mul.    | Lowdin  | Hirsch. | I-Hirsch | CM5     | ESP     | NPA     | AIM     | ACP     |
|---|---------------------------|---------|--------|---------|---------|---------|----------|---------|---------|---------|---------|---------|
| 8 | 1.1573                    | 0.1197  | 0.0000 | -0.2851 | 0.0903  | -0.2675 | -0.5328  | -0.3226 | -0.5052 | -0.5629 | -1.1789 | -0.3841 |
| 6 | 0.0000                    | 0.4175  | 0.0000 | 0.2271  | -0.4728 | 0.1927  | 0.6818   | 0.2035  | 0.5867  | 0.6269  | 1.6193  | 0.3676  |
| 1 | -0.3967                   | 1.4432  | 0.0000 | 0.0919  | 0.1095  | 0.0613  | 0.0396   | 0.1325  | 0.0487  | 0.1086  | 0.0799  | 0.0955  |
| 8 | -1.0261                   | -0.4459 | 0.0000 | -0.3528 | 0.0824  | -0.1682 | -0.6428  | -0.3715 | -0.5619 | -0.6561 | -1.1127 | -0.3447 |
| 1 | -0.6527                   | -1.3389 | 0.0000 | 0.3190  | 0.1906  | 0.1817  | 0.4541   | 0.3582  | 0.4317  | 0.4835  | 0.5926  | 0.2659  |

Dipole moment (in D) 1.53 (DEN) 1.09 1.70 1.35 1.31 1.39 1.53 1.62 3.51 1.47

-----  
File TZVPMol112.out

Molecule PMol112 formic\_acid(s-trans)

SP Mol112 B3LYP/Def2TZVP VAC.

0 5

Dipole 2.8932 2.7007 0.0001 3.9578

Quadrupole -0.0188 0.2452 -0.2263 1.4881 0.0000 0.0000

|   | Atomic coordinates (in A) |         |         | Mul.    | Lowdin  | Hirsch. | I-Hirsch | CM5     | ESP     | NPA     | AIM     | ACP     |
|---|---------------------------|---------|---------|---------|---------|---------|----------|---------|---------|---------|---------|---------|
| 8 | -1.1708                   | -0.2186 | -0.0000 | -0.2547 | 0.1183  | -0.2514 | -0.4955  | -0.3028 | -0.4373 | -0.5259 | -1.1554 | -0.3750 |
| 6 | -0.1326                   | 0.3602  | 0.0000  | 0.1968  | -0.4787 | 0.1875  | 0.6828   | 0.1997  | 0.5573  | 0.6213  | 1.6198  | 0.3542  |
| 1 | -0.0320                   | 1.4622  | 0.0000  | 0.0651  | 0.0930  | 0.0492  | 0.0041   | 0.1181  | -0.0069 | 0.0810  | 0.0494  | 0.0885  |
| 8 | 1.0531                    | -0.2798 | -0.0000 | -0.3201 | 0.0839  | -0.1660 | -0.6267  | -0.3692 | -0.4949 | -0.6511 | -1.0974 | -0.3472 |
| 1 | 1.7690                    | 0.3638  | -0.0000 | 0.3128  | 0.1835  | 0.1807  | 0.4352   | 0.3542  | 0.3819  | 0.4747  | 0.5836  | 0.2795  |

Dipole moment (in D) 3.96 (DEN) 3.10 1.61 2.47 4.40 3.75 3.93 5.10 8.41 3.59

-----  
File TZVPMol113.out

Molecule PMol113 acetic\_acid

SP Mol113 B3LYP/Def2TZVP VAC.

0 8

Dipole -0.7293 -1.5737 0.0002 1.7345

Quadrupole 4.4401 -4.8694 0.4293 -2.2896 -0.0001 0.0005

|   | Atomic coordinates (in A) |         |         | Mul.    | Lowdin  | Hirsch. | I-Hirsch | CM5     | ESP     | NPA     | AIM     | ACP     |
|---|---------------------------|---------|---------|---------|---------|---------|----------|---------|---------|---------|---------|---------|
| 6 | 0.0907                    | 0.1289  | 0.0001  | 0.2963  | -0.5346 | 0.2139  | 0.9016   | 0.2589  | 0.7523  | 0.7650  | 1.5703  | 0.4649  |
| 6 | -1.3825                   | -0.1088 | 0.0000  | -0.3293 | -0.2574 | -0.0796 | -0.5652  | -0.2203 | -0.3987 | -0.7064 | 0.0075  | -0.2528 |
| 8 | 0.6407                    | 1.1973  | -0.0001 | -0.3061 | 0.1013  | -0.2838 | -0.5833  | -0.3341 | -0.5550 | -0.5744 | -1.1927 | -0.4040 |
| 8 | 0.7709                    | -1.0420 | 0.0000  | -0.3744 | 0.0897  | -0.1788 | -0.6717  | -0.3773 | -0.5895 | -0.6709 | -1.1136 | -0.3593 |
| 1 | 1.7097                    | -0.8148 | -0.0001 | 0.3177  | 0.1904  | 0.1752  | 0.4508   | 0.3534  | 0.4082  | 0.4857  | 0.5915  | 0.2592  |
| 1 | -1.6687                   | -0.6920 | -0.8732 | 0.1313  | 0.1384  | 0.0517  | 0.1569   | 0.1070  | 0.1333  | 0.2351  | 0.0457  | 0.0987  |
| 1 | -1.9141                   | 0.8354  | -0.0002 | 0.1332  | 0.1337  | 0.0496  | 0.1539   | 0.1054  | 0.1162  | 0.2308  | 0.0465  | 0.0946  |
| 1 | -1.6688                   | -0.6915 | 0.8735  | 0.1313  | 0.1384  | 0.0517  | 0.1569   | 0.1070  | 0.1333  | 0.2350  | 0.0457  | 0.0987  |

Dipole moment (in D) 1.73 (DEN) 1.33 1.22 1.59 1.38 1.56 1.76 1.99 4.42 1.73

-----  
File TZVPMol114.out

Molecule PMol114 glyoxylic\_acid(trans)

SP Mol114 B3LYP/Def2TZVP VAC.

0 7

Dipole -0.3057 -1.9290 0.0000 1.9531

Quadrupole 3.8077 -6.7936 2.9859 0.0902 0.0000 0.0000

|   | Atomic coordinates (in A) |        |        | Mul.    | Lowdin  | Hirsch. | I-Hirsch | CM5     | ESP     | NPA     | AIM     | ACP     |
|---|---------------------------|--------|--------|---------|---------|---------|----------|---------|---------|---------|---------|---------|
| 8 | -0.5682                   | 1.6346 | 0.0000 | -0.2562 | 0.1542  | -0.2433 | -0.4973  | -0.2867 | -0.4573 | -0.5067 | -1.1312 | -0.3698 |
| 6 | 0.0000                    | 0.5806 | 0.0000 | 0.2632  | -0.5257 | 0.1988  | 0.6916   | 0.2558  | 0.5630  | 0.6431  | 1.6172  | 0.4327  |

|   |         |         |        |         |         |         |         |         |         |         |         |         |
|---|---------|---------|--------|---------|---------|---------|---------|---------|---------|---------|---------|---------|
| 6 | -0.7469 | -0.7503 | 0.0000 | 0.1158  | -0.2435 | 0.1589  | 0.2682  | 0.1517  | 0.3351  | 0.3296  | 1.0249  | 0.2422  |
| 8 | 1.3241  | 0.4352  | 0.0000 | -0.3240 | 0.1379  | -0.1558 | -0.6085 | -0.3474 | -0.4622 | -0.6260 | -1.1060 | -0.3438 |
| 1 | 1.5123  | -0.5187 | 0.0000 | 0.3337  | 0.2014  | 0.1654  | 0.4333  | 0.3481  | 0.3641  | 0.4951  | 0.6090  | 0.2430  |
| 8 | -0.1536 | -1.7947 | 0.0000 | -0.2506 | 0.1460  | -0.1886 | -0.3642 | -0.2496 | -0.3802 | -0.4816 | -1.1006 | -0.2995 |
| 1 | -1.8493 | -0.6636 | 0.0000 | 0.1182  | 0.1297  | 0.0646  | 0.0768  | 0.1281  | 0.0375  | 0.1465  | 0.0864  | 0.0952  |

Dipole mement (in D) 1.95 (DEN) 1.44 1.99 1.25 2.51 1.97 1.97 2.50 4.14 1.85

-----  
File TZVPMol115.out

Molecule PMol115 propionic\_acid(cis)

SP Mol115 B3LYP/Def2TZVP VAC.

0 11

Dipole -1.5661 -0.3757 0.0000 1.6105  
 Quadrupole -4.9724 4.4649 0.5075 -0.6382 0.0000 0.0000

|   | Atomic coordinates (in A) |         |         | Mul.    | Lowdin  | Hirsch. | I-Hirsch | CM5     | ESP     | NPA     | AIM     | ACP     |
|---|---------------------------|---------|---------|---------|---------|---------|----------|---------|---------|---------|---------|---------|
| 8 | 1.1714                    | 0.8385  | 0.0000  | -0.3064 | 0.1057  | -0.2762 | -0.5763  | -0.3276 | -0.5441 | -0.5810 | -1.1939 | -0.3945 |
| 6 | 0.0000                    | 0.5676  | 0.0000  | 0.2903  | -0.5061 | 0.2128  | 0.8770   | 0.2594  | 0.6617  | 0.7692  | 1.5561  | 0.4633  |
| 6 | -0.5893                   | -0.8109 | 0.0000  | -0.1951 | -0.2580 | -0.0452 | -0.3616  | -0.1467 | 0.0810  | -0.5024 | 0.0393  | -0.1428 |
| 6 | 0.4572                    | -1.9011 | 0.0000  | -0.3046 | -0.2948 | -0.0820 | -0.3244  | -0.2319 | -0.3538 | -0.5868 | 0.0274  | -0.2499 |
| 8 | -0.9685                   | 1.5131  | 0.0000  | -0.3765 | 0.0917  | -0.1785 | -0.6805  | -0.3776 | -0.6326 | -0.6685 | -1.1158 | -0.3586 |
| 1 | -0.5191                   | 2.3679  | 0.0000  | 0.3156  | 0.1894  | 0.1745  | 0.4508   | 0.3528  | 0.4330  | 0.4849  | 0.5910  | 0.2587  |
| 1 | -1.2539                   | -0.8841 | 0.8638  | 0.1187  | 0.1525  | 0.0464  | 0.1336   | 0.1051  | 0.0332  | 0.2283  | 0.0320  | 0.0895  |
| 1 | -1.2539                   | -0.8841 | -0.8638 | 0.1187  | 0.1525  | 0.0464  | 0.1336   | 0.1051  | 0.0332  | 0.2283  | 0.0320  | 0.0895  |
| 1 | -0.0054                   | -2.8857 | 0.0000  | 0.1115  | 0.1186  | 0.0327  | 0.1108   | 0.0845  | 0.0880  | 0.2041  | 0.0002  | 0.0864  |
| 1 | 1.1011                    | -1.8299 | 0.8742  | 0.1139  | 0.1243  | 0.0345  | 0.1185   | 0.0885  | 0.1002  | 0.2119  | 0.0160  | 0.0792  |
| 1 | 1.1011                    | -1.8299 | -0.8742 | 0.1139  | 0.1243  | 0.0345  | 0.1185   | 0.0885  | 0.1002  | 0.2119  | 0.0160  | 0.0792  |

Dipole mement (in D) 1.61 (DEN) 1.26 0.87 1.45 1.25 1.42 1.60 1.91 4.38 1.66

-----  
File TZVPMol116.out

Molecule PMol116 acrylic\_acid(s-cis)

SP Mol116 B3LYP/Def2TZVP VAC.

0 9

Dipole -1.2983 -0.8651 0.0000 1.5601  
 Quadrupole -4.1690 6.2790 -2.1100 -2.2499 0.0000 0.0000

|   | Atomic coordinates (in A) |         |        | Mul.    | Lowdin  | Hirsch. | I-Hirsch | CM5     | ESP     | NPA     | AIM     | ACP     |
|---|---------------------------|---------|--------|---------|---------|---------|----------|---------|---------|---------|---------|---------|
| 8 | 1.1425                    | 0.8678  | 0.0000 | -0.3150 | 0.1008  | -0.2813 | -0.5860  | -0.3308 | -0.5493 | -0.5798 | -1.1871 | -0.3983 |
| 6 | 0.0000                    | 0.4851  | 0.0000 | 0.3292  | -0.5032 | 0.2006  | 0.8494   | 0.2521  | 0.7379  | 0.7211  | 1.5595  | 0.4455  |
| 6 | -0.4477                   | -0.9187 | 0.0000 | -0.1773 | -0.1745 | -0.0438 | -0.2823  | -0.0964 | -0.2233 | -0.3221 | -0.0179 | -0.0877 |
| 6 | 0.4334                    | -1.9100 | 0.0000 | -0.1890 | -0.1223 | -0.0313 | -0.1590  | -0.1318 | -0.2957 | -0.2735 | -0.0349 | -0.1401 |
| 8 | -1.0582                   | 1.3292  | 0.0000 | -0.3757 | 0.0981  | -0.1744 | -0.6730  | -0.3713 | -0.5917 | -0.6592 | -1.1087 | -0.3549 |
| 1 | -0.6961                   | 2.2245  | 0.0000 | 0.3178  | 0.1912  | 0.1771  | 0.4540   | 0.3553  | 0.4146  | 0.4870  | 0.5933  | 0.2608  |
| 1 | -1.5159                   | -1.0949 | 0.0000 | 0.1301  | 0.1474  | 0.0487  | 0.1383   | 0.1089  | 0.1590  | 0.2179  | 0.0610  | 0.0852  |
| 1 | 0.1284                    | -2.9470 | 0.0000 | 0.1316  | 0.1265  | 0.0522  | 0.1238   | 0.1052  | 0.1674  | 0.1973  | 0.0532  | 0.1027  |
| 1 | 1.4953                    | -1.6963 | 0.0000 | 0.1482  | 0.1360  | 0.0521  | 0.1350   | 0.1088  | 0.1809  | 0.2112  | 0.0813  | 0.0868  |

Dipole mement (in D) 1.56 (DEN) 1.05 0.50 1.45 1.27 1.32 1.57 1.95 4.35 1.66

-----  
File TZVPMol117.out

Molecule PMol117 acrylic\_acid(s-trans)  
SP Mol117 B3LYP/Def2TZVP VAC.

0 9

Dipole 0.8700 -1.9897 0.0000 2.1716

Quadrupole 2.4065 -0.7596 -1.6469 5.0957 0.0000 0.0000

|   | Atomic coordinates (in A) |         |        | Mul.    | Lowdin  | Hirsch. | I-Hirsch | CM5     | ESP     | NPA     | AIM     | ACP     |
|---|---------------------------|---------|--------|---------|---------|---------|----------|---------|---------|---------|---------|---------|
| 8 | -0.4597                   | 1.6805  | 0.0000 | -0.3108 | 0.1044  | -0.2816 | -0.5789  | -0.3303 | -0.5480 | -0.5665 | -1.1767 | -0.4006 |
| 6 | 0.0000                    | 0.5655  | 0.0000 | 0.3295  | -0.5021 | 0.2001  | 0.8453   | 0.2512  | 0.7105  | 0.7184  | 1.5538  | 0.4436  |
| 6 | -0.8082                   | -0.6623 | 0.0000 | -0.1717 | -0.1684 | -0.0401 | -0.2758  | -0.0926 | -0.2006 | -0.3109 | -0.0119 | -0.0837 |
| 6 | -0.3056                   | -1.8908 | 0.0000 | -0.1929 | -0.1333 | -0.0370 | -0.1606  | -0.1375 | -0.2914 | -0.2858 | -0.0386 | -0.1463 |
| 8 | 1.3321                    | 0.3250  | 0.0000 | -0.3803 | 0.0961  | -0.1712 | -0.6818  | -0.3696 | -0.5635 | -0.6711 | -1.1159 | -0.3517 |
| 1 | 1.7618                    | 1.1891  | 0.0000 | 0.3184  | 0.1925  | 0.1772  | 0.4563   | 0.3560  | 0.4083  | 0.4895  | 0.5956  | 0.2630  |
| 1 | -1.8752                   | -0.4815 | 0.0000 | 0.1332  | 0.1527  | 0.0526  | 0.1363   | 0.1121  | 0.1424  | 0.2209  | 0.0653  | 0.0883  |
| 1 | -0.9455                   | -2.7629 | 0.0000 | 0.1301  | 0.1266  | 0.0516  | 0.1228   | 0.1045  | 0.1672  | 0.1979  | 0.0528  | 0.1019  |
| 1 | 0.7626                    | -2.0628 | 0.0000 | 0.1445  | 0.1315  | 0.0485  | 0.1364   | 0.1062  | 0.1751  | 0.2076  | 0.0750  | 0.0856  |

Dipole mement (in D) 2.17 (DEN) 1.68 1.64 1.94 1.96 1.88 2.22 2.55 4.82 1.94

-----  
File TZVPMol118.out

Molecule PMol118 2-methoxyethanoic\_acid(g)  
SP Mol118 B3LYP/Def2TZVP VAC.

0 12

Dipole 5.1108 -0.0627 0.0007 5.1112

Quadrupole -3.9163 1.5481 2.3683 -1.8893 -0.0015 -0.0001

|   | Atomic coordinates (in A) |         |         | Mul.    | Lowdin  | Hirsch. | I-Hirsch | CM5     | ESP     | NPA     | AIM     | ACP     |
|---|---------------------------|---------|---------|---------|---------|---------|----------|---------|---------|---------|---------|---------|
| 8 | -2.1631                   | -0.7772 | -0.0001 | -0.2939 | 0.1228  | -0.2788 | -0.5629  | -0.3244 | -0.5305 | -0.5528 | -1.1785 | -0.4071 |
| 6 | -1.1852                   | -0.0870 | 0.0002  | 0.2648  | -0.5219 | 0.2036  | 0.8230   | 0.2557  | 0.7514  | 0.7409  | 1.6258  | 0.4446  |
| 6 | 0.2124                    | -0.6651 | 0.0002  | -0.0242 | -0.2964 | 0.0246  | -0.1555  | -0.0475 | -0.3202 | -0.1871 | 0.4894  | -0.0082 |
| 8 | 1.1637                    | 0.3703  | 0.0000  | -0.3513 | 0.1258  | -0.1464 | -0.2766  | -0.2625 | -0.1658 | -0.5184 | -1.0842 | -0.2575 |
| 8 | -1.2461                   | 1.2513  | -0.0002 | -0.3401 | 0.1207  | -0.1717 | -0.6404  | -0.3650 | -0.5160 | -0.6444 | -1.1167 | -0.3587 |
| 1 | -0.3384                   | 1.5925  | -0.0002 | 0.3320  | 0.1908  | 0.1520  | 0.4286   | 0.3404  | 0.3487  | 0.4973  | 0.6125  | 0.2337  |
| 1 | 0.3180                    | -1.3096 | -0.8809 | 0.1139  | 0.1377  | 0.0473  | 0.1026   | 0.1126  | 0.1488  | 0.1933  | 0.0446  | 0.0883  |
| 1 | 0.3181                    | -1.3095 | 0.8813  | 0.1139  | 0.1377  | 0.0472  | 0.1025   | 0.1126  | 0.1486  | 0.1933  | 0.0446  | 0.0883  |
| 6 | 2.4923                    | -0.0973 | -0.0000 | -0.1684 | -0.3397 | 0.0038  | -0.0789  | -0.1188 | -0.2031 | -0.2447 | 0.4934  | -0.0969 |
| 1 | 2.7016                    | -0.7015 | -0.8885 | 0.1114  | 0.1043  | 0.0352  | 0.0781   | 0.0942  | 0.1116  | 0.1644  | 0.0146  | 0.0869  |
| 1 | 2.7017                    | -0.7014 | 0.8885  | 0.1114  | 0.1043  | 0.0352  | 0.0781   | 0.0942  | 0.1116  | 0.1644  | 0.0146  | 0.0869  |
| 1 | 3.1457                    | 0.7705  | -0.0001 | 0.1306  | 0.1139  | 0.0479  | 0.1015   | 0.1084  | 0.1150  | 0.1938  | 0.0393  | 0.0997  |

Dipole mement (in D) 5.11 (DEN) 4.30 2.23 3.55 5.53 5.05 5.16 6.48 10.45 4.95

-----  
File TZVPMol119.out

Molecule PMol119 acetoacetic\_acid

SP Mol119 B3LYP/Def2TZVP VAC.

0 10

Dipole -2.3208 0.5312 0.0004 2.3808

Quadrupole -0.5541 -2.4894 3.0435 6.2884 0.0002 0.0001

|   | Atomic coordinates (in A) |         |         | Mul.    | Lowdin  | Hirsch. | I-Hirsch | CM5     | ESP     | NPA     | AIM     | ACP     |
|---|---------------------------|---------|---------|---------|---------|---------|----------|---------|---------|---------|---------|---------|
| 8 | 1.0077                    | -1.4527 | -0.0000 | -0.2685 | 0.1429  | -0.2498 | -0.4924  | -0.2944 | -0.4616 | -0.5245 | -1.1473 | -0.3742 |
| 6 | 0.7606                    | -0.2800 | 0.0000  | 0.2609  | -0.4935 | 0.1971  | 0.6739   | 0.2552  | 0.5609  | 0.6535  | 1.6104  | 0.4299  |
| 6 | -0.6741                   | 0.2823  | 0.0001  | 0.1794  | -0.3201 | 0.1724  | 0.4776   | 0.1988  | 0.4651  | 0.4796  | 0.9956  | 0.3308  |
| 8 | 1.6821                    | 0.6806  | -0.0001 | -0.3284 | 0.1355  | -0.1609 | -0.6076  | -0.3516 | -0.4931 | -0.6272 | -1.1122 | -0.3482 |
| 1 | 1.1967                    | 1.5253  | -0.0000 | 0.3342  | 0.2018  | 0.1583  | 0.4284   | 0.3431  | 0.3749  | 0.4975  | 0.6120  | 0.2347  |
| 8 | -0.8123                   | 1.4849  | -0.0000 | -0.2939 | 0.1442  | -0.2117 | -0.4284  | -0.2694 | -0.4522 | -0.5133 | -1.1242 | -0.3254 |
| 6 | -1.7734                   | -0.7131 | 0.0000  | -0.3102 | -0.2450 | -0.0771 | -0.5458  | -0.2186 | -0.3800 | -0.7014 | -0.0124 | -0.2512 |
| 1 | -1.6766                   | -1.3685 | 0.8658  | 0.1443  | 0.1503  | 0.0599  | 0.1674   | 0.1147  | 0.1240  | 0.2517  | 0.0643  | 0.1033  |
| 1 | -1.6765                   | -1.3686 | -0.8657 | 0.1444  | 0.1503  | 0.0599  | 0.1674   | 0.1147  | 0.1240  | 0.2517  | 0.0643  | 0.1033  |
| 1 | -2.7419                   | -0.2255 | -0.0000 | 0.1378  | 0.1336  | 0.0519  | 0.1594   | 0.1073  | 0.1381  | 0.2323  | 0.0501  | 0.0969  |

Dipole moment (in D) 2.38 (DEN) 2.01 1.02 1.62 2.51 2.42 2.39 3.06 5.63 2.31

-----  
File TZVPMol120.out

Molecule PMol120 methyl\_acetate

SP Mol120 B3LYP/Def2TZVP VAC.

0 11

Dipole 1.6360 -0.9194 0.0000 1.8766

Quadrupole -3.1751 2.8192 0.3559 4.6395 0.0000 0.0000

|   | Atomic coordinates (in A) |         |         | Mul.    | Lowdin  | Hirsch. | I-Hirsch | CM5     | ESP     | NPA     | AIM     | ACP     |
|---|---------------------------|---------|---------|---------|---------|---------|----------|---------|---------|---------|---------|---------|
| 1 | 0.7314                    | 2.4902  | 0.0000  | 0.1323  | 0.1324  | 0.0477  | 0.1528   | 0.1035  | 0.1866  | 0.2288  | 0.0431  | 0.0922  |
| 6 | 1.1231                    | 1.4795  | 0.0000  | -0.3333 | -0.2565 | -0.0823 | -0.5723  | -0.2227 | -0.6864 | -0.6951 | 0.0081  | -0.2554 |
| 6 | 0.0000                    | 0.4935  | 0.0000  | 0.3233  | -0.5106 | 0.2113  | 0.8403   | 0.2611  | 0.8962  | 0.7622  | 1.5628  | 0.4648  |
| 8 | -1.1742                   | 0.7549  | 0.0000  | -0.3235 | 0.1085  | -0.2742 | -0.5705  | -0.3248 | -0.5743 | -0.5784 | -1.1887 | -0.3929 |
| 1 | 1.7553                    | 1.3329  | 0.8737  | 0.1280  | 0.1364  | 0.0491  | 0.1503   | 0.1044  | 0.1827  | 0.2324  | 0.0412  | 0.0955  |
| 1 | 1.7553                    | 1.3329  | -0.8737 | 0.1280  | 0.1364  | 0.0491  | 0.1503   | 0.1044  | 0.1827  | 0.2324  | 0.0412  | 0.0955  |
| 8 | 0.4779                    | -0.7685 | 0.0000  | -0.2656 | 0.2314  | -0.1264 | -0.3451  | -0.2152 | -0.4045 | -0.4830 | -1.0820 | -0.2487 |
| 6 | -0.5201                   | -1.7885 | 0.0000  | -0.1624 | -0.3094 | 0.0010  | -0.1040  | -0.1210 | 0.0042  | -0.2584 | 0.4559  | -0.1106 |
| 1 | 0.0142                    | -2.7325 | 0.0000  | 0.1235  | 0.1100  | 0.0441  | 0.1008   | 0.1052  | 0.0804  | 0.1870  | 0.0340  | 0.0940  |
| 1 | -1.1521                   | -1.7110 | -0.8829 | 0.1248  | 0.1107  | 0.0403  | 0.0987   | 0.1026  | 0.0662  | 0.1860  | 0.0422  | 0.0828  |
| 1 | -1.1521                   | -1.7110 | 0.8829  | 0.1248  | 0.1107  | 0.0403  | 0.0987   | 0.1026  | 0.0662  | 0.1860  | 0.0422  | 0.0828  |

Dipole moment (in D) 1.88 (DEN) 1.37 1.15 1.52 1.97 1.64 1.87 2.01 3.55 1.66

-----  
File TZVPMol121.out

Molecule PMol121 methyl\_formate

SP Mol121 B3LYP/Def2TZVP VAC.

0 8

Dipole 1.6950 0.8660 0.0000 1.9034

Quadrupole 0.3582 -0.9753 0.6172 -4.5739 0.0000 0.0000

|  | Atomic coordinates (in A) |  |  | Mul. | Lowdin | Hirsch. | I-Hirsch | CM5 | ESP | NPA | AIM | ACP |
|--|---------------------------|--|--|------|--------|---------|----------|-----|-----|-----|-----|-----|
|--|---------------------------|--|--|------|--------|---------|----------|-----|-----|-----|-----|-----|

|   |         |         |         |         |         |         |         |         |         |         |         |         |
|---|---------|---------|---------|---------|---------|---------|---------|---------|---------|---------|---------|---------|
| 8 | -1.2915 | -0.6711 | -0.0000 | -0.3019 | 0.0937  | -0.2625 | -0.5253 | -0.3179 | -0.5164 | -0.5698 | -1.1773 | -0.3775 |
| 6 | -0.8250 | 0.4314  | 0.0000  | 0.2270  | -0.4583 | 0.1863  | 0.6221  | 0.2018  | 0.6605  | 0.6235  | 1.6093  | 0.3639  |
| 8 | 0.4770  | 0.7306  | 0.0000  | -0.2457 | 0.2207  | -0.1199 | -0.3244 | -0.2140 | -0.3687 | -0.4692 | -1.0808 | -0.2379 |
| 6 | 1.3545  | -0.4012 | -0.0000 | -0.1612 | -0.3041 | 0.0052  | -0.1109 | -0.1173 | 0.0016  | -0.2676 | 0.4428  | -0.1085 |
| 1 | 1.1883  | -1.0137 | -0.8839 | 0.1291  | 0.1120  | 0.0438  | 0.1030  | 0.1058  | 0.0802  | 0.1889  | 0.0470  | 0.0869  |
| 1 | 2.3616  | 0.0000  | -0.0000 | 0.1279  | 0.1117  | 0.0476  | 0.1059  | 0.1086  | 0.0819  | 0.1907  | 0.0407  | 0.0976  |
| 1 | 1.1883  | -1.0137 | 0.8839  | 0.1291  | 0.1120  | 0.0438  | 0.1030  | 0.1058  | 0.0802  | 0.1889  | 0.0470  | 0.0869  |
| 1 | -1.3992 | 1.3698  | -0.0000 | 0.0956  | 0.1122  | 0.0559  | 0.0267  | 0.1275  | -0.0192 | 0.1147  | 0.0717  | 0.0886  |

Dipole mement (in D) 1.90 (DEN) 1.66 1.57 1.51 1.96 1.67 1.91 2.01 3.11 1.58

-----  
File TZVPMol122.out

Molecule PMol122 ethyl\_formate(cis)

SP Mol122 B3LYP/Def2TZVP VAC.

0 11

Dipole -1.5191 -1.2218 -0.2323 1.9633

Quadrupole 1.5575 -2.6498 1.0922 -3.1460 -2.2804 -0.9946

|   | Atomic coordinates (in A) |         |         | Mul.    | Lowdin  | Hirsch. | I-Hirsch | CM5     | ESP     | NPA     | AIM     | ACP     |
|---|---------------------------|---------|---------|---------|---------|---------|----------|---------|---------|---------|---------|---------|
| 8 | 1.4514                    | 0.8975  | 0.2408  | -0.3121 | 0.0875  | -0.2621 | -0.5300  | -0.3192 | -0.4913 | -0.5780 | -1.1819 | -0.3740 |
| 6 | 1.3117                    | -0.1888 | -0.2452 | 0.2247  | -0.4598 | 0.1864  | 0.6314   | 0.2019  | 0.5610  | 0.6261  | 1.6116  | 0.3656  |
| 8 | 0.2170                    | -0.9495 | -0.1833 | -0.2515 | 0.2389  | -0.1212 | -0.3528  | -0.2115 | -0.4268 | -0.4752 | -1.0793 | -0.2415 |
| 6 | -0.9040                   | -0.3850 | 0.5365  | 0.0085  | -0.3003 | 0.0365  | 0.1067   | -0.0488 | 0.3559  | -0.0848 | 0.4366  | -0.0025 |
| 6 | -1.6927                   | 0.5549  | -0.3339 | -0.3482 | -0.3062 | -0.0853 | -0.4082  | -0.2340 | -0.3155 | -0.6201 | 0.0160  | -0.2537 |
| 1 | 2.0795                    | -0.7296 | -0.8192 | 0.0942  | 0.1118  | 0.0538  | 0.0236   | 0.1255  | 0.0235  | 0.1135  | 0.0682  | 0.0867  |
| 1 | -0.5263                   | 0.1160  | 1.4275  | 0.1139  | 0.1289  | 0.0384  | 0.0842   | 0.1061  | 0.0130  | 0.1940  | 0.0494  | 0.0763  |
| 1 | -1.4896                   | -1.2501 | 0.8401  | 0.1100  | 0.1263  | 0.0420  | 0.0824   | 0.1062  | 0.0050  | 0.1858  | 0.0283  | 0.0883  |
| 1 | -2.0415                   | 0.0562  | -1.2365 | 0.1109  | 0.1206  | 0.0345  | 0.1160   | 0.0885  | 0.0948  | 0.2063  | 0.0101  | 0.0826  |
| 1 | -1.0936                   | 1.4161  | -0.6219 | 0.1387  | 0.1264  | 0.0367  | 0.1263   | 0.0928  | 0.1140  | 0.2194  | 0.0296  | 0.0782  |
| 1 | -2.5652                   | 0.9199  | 0.2057  | 0.1109  | 0.1260  | 0.0404  | 0.1204   | 0.0924  | 0.0664  | 0.2130  | 0.0115  | 0.0941  |

Dipole mement (in D) 1.96 (DEN) 1.75 1.77 1.54 1.98 1.73 1.93 2.12 3.06 1.61

-----  
File TZVPMol123.out

Molecule PMol123 ethyl\_formate(trans)

SP Mol123 B3LYP/Def2TZVP VAC.

0 11

Dipole -2.0934 0.5640 0.0000 2.1680

Quadrupole -2.5957 1.2213 1.3744 4.8296 0.0000 0.0000

|   | Atomic coordinates (in A) |         |        | Mul.    | Lowdin  | Hirsch. | I-Hirsch | CM5     | ESP     | NPA     | AIM     | ACP     |
|---|---------------------------|---------|--------|---------|---------|---------|----------|---------|---------|---------|---------|---------|
| 8 | 1.9788                    | -0.3835 | 0.0000 | -0.3047 | 0.0902  | -0.2651 | -0.5345  | -0.3207 | -0.5379 | -0.5732 | -1.1788 | -0.3790 |
| 6 | 1.3317                    | 0.6247  | 0.0000 | 0.2186  | -0.4588 | 0.1843  | 0.6228   | 0.2000  | 0.6556  | 0.6286  | 1.6114  | 0.3628  |
| 8 | 0.0000                    | 0.7029  | 0.0000 | -0.2459 | 0.2382  | -0.1187 | -0.3445  | -0.2086 | -0.4446 | -0.4782 | -1.0809 | -0.2399 |
| 6 | -0.6942                   | -0.5643 | 0.0000 | -0.0271 | -0.3009 | 0.0361  | 0.1064   | -0.0486 | 0.3958  | -0.0833 | 0.4377  | -0.0021 |
| 6 | -2.1665                   | -0.2783 | 0.0000 | -0.2969 | -0.3045 | -0.0828 | -0.3927  | -0.2313 | -0.4047 | -0.6090 | 0.0270  | -0.2495 |
| 1 | 1.7435                    | 1.6455  | 0.0000 | 0.0941  | 0.1112  | 0.0537  | 0.0241   | 0.1253  | -0.0078 | 0.1125  | 0.0681  | 0.0865  |
| 1 | -0.3764                   | -1.1313 | 0.8764 | 0.1123  | 0.1272  | 0.0392  | 0.0817   | 0.1048  | 0.0077  | 0.1859  | 0.0368  | 0.0785  |



|   |         |         |         |        |        |        |        |        |        |        |        |        |
|---|---------|---------|---------|--------|--------|--------|--------|--------|--------|--------|--------|--------|
| 1 | -0.3764 | -1.1313 | -0.8764 | 0.1123 | 0.1272 | 0.0392 | 0.0817 | 0.1048 | 0.0077 | 0.1859 | 0.0368 | 0.0785 |
| 1 | -2.7280 | -1.2106 | 0.0000  | 0.1105 | 0.1257 | 0.0405 | 0.1184 | 0.0926 | 0.0895 | 0.2128 | 0.0122 | 0.0944 |
| 1 | -2.4593 | 0.2900  | -0.8808 | 0.1134 | 0.1222 | 0.0368 | 0.1183 | 0.0909 | 0.1194 | 0.2091 | 0.0144 | 0.0849 |
| 1 | -2.4593 | 0.2900  | 0.8808  | 0.1134 | 0.1222 | 0.0368 | 0.1183 | 0.0909 | 0.1194 | 0.2091 | 0.0144 | 0.0849 |

Dipole mement (in D) 2.17 (DEN) 2.07 2.01 1.77 2.00 1.95 2.20 2.34 3.51 1.70

-----  
File TZVPMol124.out

Molecule PMol124 ethyl\_acetate

SP Mol124 B3LYP/Def2TZVP VAC.

0 14

Dipole -0.9870 -1.7835 0.0000 2.0384

Quadrupole 3.3395 -4.1514 0.8119 -5.0232 0.0000 0.0000

|   | Atomic coordinates (in A) |         |         | Mul.    | Lowdin  | Hirsch. | I-Hirsch | CM5     | ESP     | NPA     | AIM     | ACP     |
|---|---------------------------|---------|---------|---------|---------|---------|----------|---------|---------|---------|---------|---------|
| 6 | 1.0338                    | 0.1464  | -0.0000 | 0.3161  | -0.5099 | 0.2102  | 0.8399   | 0.2601  | 0.8639  | 0.7668  | 1.5667  | 0.4643  |
| 8 | 1.1853                    | 1.3404  | -0.0000 | -0.3256 | 0.1058  | -0.2761 | -0.5787  | -0.3269 | -0.5865 | -0.5812 | -1.1899 | -0.3938 |
| 8 | -0.1749                   | -0.4492 | 0.0000  | -0.2648 | 0.2500  | -0.1244 | -0.3658  | -0.2089 | -0.4722 | -0.4907 | -1.0823 | -0.2504 |
| 6 | -1.3031                   | 0.4445  | 0.0000  | -0.0253 | -0.3052 | 0.0328  | 0.1096   | -0.0512 | 0.3612  | -0.0717 | 0.4522  | -0.0034 |
| 1 | -1.2357                   | 1.0925  | -0.8756 | 0.1077  | 0.1262  | 0.0363  | 0.0785   | 0.1022  | 0.0041  | 0.1810  | 0.0330  | 0.0749  |
| 1 | -1.2357                   | 1.0925  | 0.8757  | 0.1077  | 0.1262  | 0.0363  | 0.0785   | 0.1022  | 0.0041  | 0.1810  | 0.0330  | 0.0749  |
| 6 | 2.1248                    | -0.8767 | -0.0000 | -0.3347 | -0.2570 | -0.0832 | -0.5704  | -0.2236 | -0.5981 | -0.6946 | 0.0066  | -0.2562 |
| 1 | 2.0401                    | -1.5202 | 0.8737  | 0.1270  | 0.1357  | 0.0483  | 0.1491   | 0.1035  | 0.1646  | 0.2314  | 0.0397  | 0.0949  |
| 1 | 2.0401                    | -1.5202 | -0.8738 | 0.1270  | 0.1357  | 0.0483  | 0.1491   | 0.1035  | 0.1646  | 0.2314  | 0.0397  | 0.0949  |
| 1 | 3.0927                    | -0.3888 | -0.0000 | 0.1316  | 0.1320  | 0.0470  | 0.1518   | 0.1028  | 0.1625  | 0.2283  | 0.0422  | 0.0914  |
| 6 | -2.5489                   | -0.3925 | 0.0000  | -0.2962 | -0.3058 | -0.0843 | -0.3886  | -0.2327 | -0.3720 | -0.6074 | 0.0260  | -0.2505 |
| 1 | -3.4300                   | 0.2465  | 0.0000  | 0.1089  | 0.1246  | 0.0389  | 0.1155   | 0.0910  | 0.0847  | 0.2112  | 0.0095  | 0.0927  |
| 1 | -2.5970                   | -1.0306 | -0.8806 | 0.1104  | 0.1209  | 0.0350  | 0.1157   | 0.0890  | 0.1096  | 0.2072  | 0.0113  | 0.0832  |
| 1 | -2.5970                   | -1.0306 | 0.8807  | 0.1104  | 0.1209  | 0.0350  | 0.1157   | 0.0890  | 0.1096  | 0.2072  | 0.0113  | 0.0832  |

Dipole mement (in D) 2.04 (DEN) 1.70 1.57 1.67 1.97 1.83 2.07 2.26 3.79 1.69

-----  
File TZVPMol125.out

Molecule PMol125 pentyl\_formate

SP Mol125 B3LYP/Def2TZVP VAC.

0 20

Dipole 1.9696 -1.3190 0.0000 2.3705

Quadrupole -3.1501 -0.6376 3.7877 6.5949 -0.0001 0.0000

|   | Atomic coordinates (in A) |         |         | Mul.    | Lowdin  | Hirsch. | I-Hirsch | CM5     | ESP     | NPA     | AIM     | ACP     |
|---|---------------------------|---------|---------|---------|---------|---------|----------|---------|---------|---------|---------|---------|
| 6 | 2.8699                    | -0.4482 | -0.0000 | -0.1375 | -0.2919 | -0.0436 | -0.1186  | -0.1567 | 0.2823  | -0.3767 | 0.0563  | -0.1354 |
| 6 | 1.5553                    | 0.3138  | 0.0000  | -0.2095 | -0.2633 | -0.0438 | -0.1489  | -0.1549 | 0.0040  | -0.3758 | 0.0426  | -0.1397 |
| 1 | 2.9016                    | -1.1102 | 0.8702  | 0.0848  | 0.1322  | 0.0270  | 0.0821   | 0.0822  | -0.0563 | 0.1901  | -0.0161 | 0.0757  |
| 1 | 2.9016                    | -1.1102 | -0.8702 | 0.0848  | 0.1322  | 0.0270  | 0.0821   | 0.0822  | -0.0563 | 0.1901  | -0.0162 | 0.0757  |
| 6 | 0.3371                    | -0.5937 | 0.0000  | -0.1129 | -0.2655 | -0.0497 | -0.2270  | -0.1577 | -0.2093 | -0.4021 | 0.0553  | -0.1462 |
| 1 | 1.5199                    | 0.9771  | 0.8708  | 0.0864  | 0.1350  | 0.0277  | 0.0829   | 0.0836  | -0.0110 | 0.1882  | -0.0162 | 0.0751  |
| 1 | 1.5199                    | 0.9771  | -0.8707 | 0.0864  | 0.1350  | 0.0277  | 0.0829   | 0.0836  | -0.0110 | 0.1882  | -0.0162 | 0.0751  |
| 6 | -0.9485                   | 0.1877  | 0.0000  | -0.0348 | -0.2736 | 0.0330  | 0.0882   | -0.0496 | 0.4110  | -0.0711 | 0.4332  | -0.0072 |

|   |         |         |         |         |         |         |         |         |         |         |         |         |
|---|---------|---------|---------|---------|---------|---------|---------|---------|---------|---------|---------|---------|
| 1 | 0.3594  | -1.2513 | -0.8728 | 0.0919  | 0.1379  | 0.0318  | 0.0960  | 0.0899  | 0.0585  | 0.2003  | -0.0002 | 0.0746  |
| 1 | 0.3594  | -1.2513 | 0.8728  | 0.0919  | 0.1379  | 0.0318  | 0.0960  | 0.0899  | 0.0585  | 0.2003  | -0.0002 | 0.0746  |
| 1 | -1.0407 | 0.8327  | 0.8768  | 0.1086  | 0.1291  | 0.0373  | 0.0783  | 0.1034  | -0.0016 | 0.1820  | 0.0333  | 0.0753  |
| 1 | -1.0407 | 0.8327  | -0.8768 | 0.1086  | 0.1291  | 0.0373  | 0.0783  | 0.1034  | -0.0016 | 0.1820  | 0.0333  | 0.0753  |
| 6 | 4.0824  | 0.4614  | -0.0000 | -0.3261 | -0.3089 | -0.0838 | -0.3293 | -0.2356 | -0.2792 | -0.5840 | 0.0139  | -0.2473 |
| 1 | 4.0929  | 1.1095  | 0.8773  | 0.1026  | 0.1169  | 0.0279  | 0.0978  | 0.0797  | 0.0578  | 0.1958  | -0.0079 | 0.0801  |
| 1 | 5.0148  | -0.1010 | -0.0000 | 0.1135  | 0.1172  | 0.0302  | 0.1005  | 0.0815  | 0.0602  | 0.2045  | -0.0031 | 0.0837  |
| 1 | 4.0928  | 1.1095  | -0.8773 | 0.1026  | 0.1169  | 0.0279  | 0.0978  | 0.0797  | 0.0578  | 0.1958  | -0.0079 | 0.0801  |
| 8 | -2.0453 | -0.7502 | 0.0000  | -0.2446 | 0.2421  | -0.1178 | -0.3516 | -0.2080 | -0.4870 | -0.4752 | -1.0834 | -0.2387 |
| 6 | -3.2634 | -0.2068 | 0.0000  | 0.2135  | -0.4594 | 0.1840  | 0.6245  | 0.1997  | 0.6796  | 0.6288  | 1.6120  | 0.3625  |
| 8 | -3.5133 | 0.9647  | -0.0000 | -0.3037 | 0.0900  | -0.2657 | -0.5355 | -0.3212 | -0.5477 | -0.5732 | -1.1792 | -0.3795 |
| 1 | -4.0093 | -1.0164 | -0.0000 | 0.0934  | 0.1110  | 0.0534  | 0.0235  | 0.1249  | -0.0084 | 0.1122  | 0.0675  | 0.0862  |

Dipole mement (in D) 2.37 (DEN) 2.33 2.20 1.96 2.22 2.15 2.37 2.46 3.70 1.87

-----  
File TZVPMol126.out

Molecule PMol126 diethyl\_carbonate

SP Mol126 B3LYP/Def2TZVP VAC.

0 18

Dipole 0.1233 -0.4237 0.2241 0.4949

Quadrupole 8.7029 -7.5647 -1.1383 2.2717 0.7726 0.7436

|   | Atomic coordinates (in A) |         |         | Mul.    | Lowdin  | Hirsch. | I-Hirsch | CM5     | ESP     | NPA     | AIM     | ACP     |
|---|---------------------------|---------|---------|---------|---------|---------|----------|---------|---------|---------|---------|---------|
| 6 | -2.3741                   | -0.3460 | -0.4789 | 0.0129  | -0.3015 | 0.0372  | 0.1170   | -0.0473 | 0.3364  | -0.0727 | 0.4553  | -0.0000 |
| 6 | -2.9858                   | 0.0788  | 0.8285  | -0.3532 | -0.3068 | 0.0868  | -0.4088  | -0.2354 | -0.2669 | -0.6213 | 0.0143  | -0.2550 |
| 1 | -2.3692                   | 0.4705  | -1.2011 | 0.1098  | 0.1289  | 0.0367  | 0.0825   | 0.1048  | -0.0142 | 0.1921  | 0.0471  | 0.0743  |
| 1 | -2.8969                   | -1.1951 | -0.9151 | 0.1086  | 0.1264  | 0.0415  | 0.0828   | 0.1060  | 0.0157  | 0.1839  | 0.0265  | 0.0872  |
| 1 | -2.9680                   | -0.7333 | 1.5534  | 0.1113  | 0.1204  | 0.0340  | 0.1159   | 0.0880  | 0.0789  | 0.2058  | 0.0091  | 0.0817  |
| 1 | -2.4555                   | 0.9316  | 1.2469  | 0.1377  | 0.1259  | 0.0351  | 0.1258   | 0.0915  | 0.0859  | 0.2188  | 0.0286  | 0.0761  |
| 1 | -4.0237                   | 0.3718  | 0.6780  | 0.1086  | 0.1250  | 0.0391  | 0.1183   | 0.0911  | 0.0601  | 0.2116  | 0.0089  | 0.0926  |
| 8 | -1.0251                   | -0.8187 | -0.3030 | -0.2671 | 0.2641  | -0.1268 | -0.4204  | -0.2048 | -0.4638 | -0.4718 | -1.0769 | -0.2606 |
| 6 | -0.0974                   | 0.1370  | -0.2233 | 0.4299  | -0.6438 | 0.2585  | 1.0330   | 0.3444  | 0.9192  | 0.9517  | 2.1921  | 0.5964  |
| 8 | -0.2827                   | 1.3237  | -0.3107 | -0.3679 | 0.0800  | -0.2854 | -0.6721  | -0.3377 | -0.5867 | -0.6389 | -1.2150 | -0.3994 |
| 8 | 1.0795                    | -0.4614 | -0.0347 | -0.2593 | 0.2641  | -0.1237 | -0.4136  | -0.2012 | -0.4872 | -0.4754 | -1.0773 | -0.2579 |
| 6 | 2.1989                    | 0.4376  | 0.0659  | -0.0234 | -0.3010 | 0.0365  | 0.1183   | -0.0474 | 0.4488  | -0.0692 | 0.4557  | -0.0000 |
| 6 | 3.4284                    | -0.3968 | 0.2738  | -0.2976 | -0.3034 | -0.0829 | -0.3898  | -0.2314 | -0.3213 | -0.6088 | 0.0268  | -0.2496 |
| 1 | 2.0204                    | 1.1292  | 0.8912  | 0.1063  | 0.1261  | 0.0369  | 0.0784   | 0.1028  | -0.0324 | 0.1822  | 0.0329  | 0.0762  |
| 1 | 2.2512                    | 1.0363  | -0.8451 | 0.1078  | 0.1264  | 0.0372  | 0.0787   | 0.1031  | -0.0319 | 0.1826  | 0.0334  | 0.0761  |
| 1 | 3.5873                    | -1.0802 | -0.5582 | 0.1138  | 0.1222  | 0.0368  | 0.1190   | 0.0910  | 0.0957  | 0.2092  | 0.0146  | 0.0845  |
| 1 | 4.3042                    | 0.2439  | 0.3558  | 0.1084  | 0.1249  | 0.0393  | 0.1160   | 0.0914  | 0.0664  | 0.2112  | 0.0098  | 0.0931  |
| 1 | 3.3560                    | -0.9871 | 1.1853  | 0.1133  | 0.1221  | 0.0367  | 0.1188   | 0.0909  | 0.0973  | 0.2090  | 0.0143  | 0.0844  |

Dipole mement (in D) 0.49 (DEN) 0.25 1.19 0.78 0.56 0.30 0.53 0.50 0.85 0.27

-----  
File TZVPMol127.out

Molecule PMol127 maleic\_anhydride

SP Mol127 B3LYP/Def2TZVP VAC.

```

0 9
Dipole      0.0000  0.0000 -4.2086  4.2086
Quadrupole  3.2607 -7.7109  4.4502  0.0000  0.0000  0.0000
  Atomic coordinates (in A)  Mul.  Lowdin  Hirsch.  I-Hirsch  CM5  ESP  NPA  AIM  ACP
8  0.0000  0.0000  0.9644 -0.1985  0.3159 -0.1116 -0.4371 -0.1645 -0.3819 -0.4680 -1.0249 -0.2560
6  0.0000  1.1263  0.1554  0.2966 -0.4171  0.2104  0.7672  0.2696  0.6945  0.7112  1.5435  0.4251
6  0.0000 -1.1263  0.1554  0.2966 -0.4171  0.2104  0.7672  0.2696  0.6945  0.7112  1.5445  0.4251
8  0.0000 -2.2307  0.5980 -0.2181  0.1809 -0.2250 -0.4800 -0.2672 -0.4537 -0.4747 -1.1245 -0.3559
8  0.0000  2.2307  0.5980 -0.2181  0.1809 -0.2250 -0.4800 -0.2672 -0.4537 -0.4747 -1.1245 -0.3559
6  0.0000 -0.6643 -1.2493 -0.1382 -0.0749 -0.0070 -0.2404 -0.0550 -0.2344 -0.2426 -0.0152 -0.0604
6  0.0000  0.6643 -1.2493 -0.1382 -0.0749 -0.0070 -0.2404 -0.0550 -0.2344 -0.2426 -0.0153 -0.0604
1  0.0000  1.3538 -2.0784  0.1590  0.1531  0.0773  0.1718  0.1348  0.1845  0.2400  0.1081  0.1192
1  0.0000 -1.3538 -2.0784  0.1590  0.1531  0.0773  0.1718  0.1348  0.1845  0.2400  0.1081  0.1192

Dipole mement (in D)  4.21 (DEN)  3.25  0.28  2.96  4.18  3.93  4.21  5.71  10.88  4.25

```

```

-----
File TZVPMol128.out
Molecule PMol128  \beta-propiolactone
SP Mol128 B3LYP/Def2TZVP VAC.

```

```

0 9
Dipole      2.0986 -3.7179  0.0000  4.2693
Quadrupole -0.0167 -2.5338  2.5505 -0.0078  0.0000  0.0000
  Atomic coordinates (in A)  Mul.  Lowdin  Hirsch.  I-Hirsch  CM5  ESP  NPA  AIM  ACP
8  -0.0784  1.8063  0.0000 -0.2504  0.1434 -0.2605 -0.5396 -0.3033 -0.5228 -0.5224 -1.1816 -0.3907
6  0.0000  0.6229  0.0000  0.2750 -0.4669  0.2053  0.8019  0.2609  0.7835  0.7636  1.5880  0.4274
8  -1.0292 -0.2829  0.0000 -0.2525  0.2377 -0.1401 -0.3553 -0.2109 -0.4249 -0.4596 -0.9893 -0.2647
6  -0.0940 -1.4026  0.0000  0.0292 -0.2396  0.0378  0.0615 -0.0439  0.3149 -0.0760  0.4137 -0.0110
6  1.0774 -0.4371  0.0000 -0.2637 -0.2072 -0.0504 -0.4483 -0.1470 -0.5341 -0.5431 -0.0150 -0.1571
1  -0.2278 -2.0109  0.8920  0.1025  0.1209  0.0472  0.0925  0.1088  0.0231  0.1830  0.0394  0.0939
1  -0.2278 -2.0109 -0.8920  0.1025  0.1209  0.0472  0.0925  0.1088  0.0231  0.1830  0.0394  0.0939
1  1.7082 -0.4323 -0.8850  0.1287  0.1454  0.0567  0.1475  0.1133  0.1687  0.2357  0.0528  0.1042
1  1.7082 -0.4323  0.8850  0.1287  0.1454  0.0567  0.1475  0.1133  0.1687  0.2357  0.0528  0.1042

Dipole mement (in D)  4.27 (DEN)  3.67  1.37  3.06  4.10  4.08  4.31  5.49  9.82  4.19

```

```

-----
File TZVPMol129.out
Molecule PMol129  \gamma-butyrolactone
SP Mol129 B3LYP/Def2TZVP VAC.

```

```

0 12
Dipole      4.4038  1.5381  0.4035  4.6821
Quadrupole -4.2537  1.2592  2.9945 -1.7173 -0.2837 -0.1013
  Atomic coordinates (in A)  Mul.  Lowdin  Hirsch.  I-Hirsch  CM5  ESP  NPA  AIM  ACP
8  -2.0755 -0.0297 -0.0718 -0.2743  0.1256 -0.2781 -0.5615 -0.3220 -0.5394 -0.5430 -1.1819 -0.4071
6  -0.8841  0.0008  0.0028  0.2444 -0.4711  0.2027  0.8111  0.2569  0.6812  0.7597  1.5667  0.4312
8  -0.1249 -1.1270 -0.0463 -0.2297  0.2595 -0.1296 -0.3616 -0.2067 -0.3691 -0.4625 -1.0437 -0.2599
6  0.0276  1.1951  0.1692 -0.1955 -0.2203 -0.0490 -0.4078 -0.1481 -0.1331 -0.5157  0.0124 -0.1547

```

|   |         |         |         |         |         |         |         |         |         |         |        |         |
|---|---------|---------|---------|---------|---------|---------|---------|---------|---------|---------|--------|---------|
| 6 | 1.3934  | 0.6632  | -0.2213 | -0.2022 | -0.2525 | -0.0484 | -0.2158 | -0.1544 | -0.0434 | -0.4204 | 0.0345 | -0.1502 |
| 6 | 1.2628  | -0.8108 | 0.1296  | -0.0088 | -0.2686 | 0.0355  | 0.0788  | -0.0463 | 0.0808  | -0.0717 | 0.4540 | -0.0060 |
| 1 | -0.0134 | 1.4966  | 1.2183  | 0.1178  | 0.1546  | 0.0505  | 0.1356  | 0.1084  | 0.0680  | 0.2309  | 0.0346 | 0.0951  |
| 1 | -0.3336 | 2.0357  | -0.4159 | 0.1235  | 0.1482  | 0.0523  | 0.1435  | 0.1100  | 0.0559  | 0.2386  | 0.0453 | 0.0967  |
| 1 | 1.5564  | 0.7819  | -1.2926 | 0.1065  | 0.1392  | 0.0386  | 0.1064  | 0.0956  | 0.0522  | 0.2064  | 0.0093 | 0.0868  |
| 1 | 2.2248  | 1.1411  | 0.2913  | 0.1091  | 0.1355  | 0.0416  | 0.1112  | 0.0967  | 0.0281  | 0.2158  | 0.0155 | 0.0932  |
| 1 | 1.8383  | -1.4784 | -0.5078 | 0.1118  | 0.1261  | 0.0463  | 0.0870  | 0.1093  | 0.0633  | 0.1914  | 0.0360 | 0.0928  |
| 1 | 1.5320  | -1.0135 | 1.1698  | 0.0974  | 0.1237  | 0.0377  | 0.0731  | 0.1006  | 0.0554  | 0.1706  | 0.0177 | 0.0823  |

Dipole mement (in D) 4.68 (DEN) 4.11 1.52 3.34 4.56 4.46 4.72 6.05 10.52 4.52

-----  
File TZVPMol130.out

Molecule PMol130 2-methoxyethanol\_(gauche  
SP Mol130 B3LYP/Def2TZVP VAC.

0 13

Dipole 1.1526 -1.1717 -1.1344 1.9971

Quadrupole -1.2020 -0.0199 1.2219 -0.5178 3.7269 1.5055

|   | Atomic coordinates (in A) |         |         | Mul.    | Lowdin  | Hirsch. | I-Hirsch | CM5     | ESP     | NPA     | AIM     | ACP     |
|---|---------------------------|---------|---------|---------|---------|---------|----------|---------|---------|---------|---------|---------|
| 8 | 1.1389                    | 0.5050  | -0.0514 | -0.3121 | 0.1469  | -0.1624 | -0.3008  | -0.2703 | -0.4061 | -0.4909 | -1.0668 | -0.2747 |
| 6 | 0.0232                    | -0.3430 | 0.0413  | -0.0259 | -0.3462 | 0.0161  | 0.0575   | -0.0628 | 0.1509  | -0.0825 | 0.5146  | -0.0062 |
| 6 | -1.2262                   | 0.5074  | -0.0032 | 0.0259  | -0.3475 | 0.0212  | 0.0879   | -0.0622 | 0.2339  | -0.0713 | 0.5298  | -0.0053 |
| 1 | 0.0478                    | -0.9293 | 0.9709  | 0.0832  | 0.1165  | 0.0259  | 0.0536   | 0.0903  | 0.0250  | 0.1557  | 0.0028  | 0.0684  |
| 1 | 0.0188                    | -1.0688 | -0.7891 | 0.0544  | 0.1093  | 0.0191  | 0.0364   | 0.0830  | 0.0091  | 0.1373  | -0.0209 | 0.0641  |
| 1 | -1.2438                   | 1.1832  | 0.8515  | 0.0977  | 0.1274  | 0.0401  | 0.0838   | 0.1064  | 0.0608  | 0.1784  | 0.0283  | 0.0807  |
| 1 | -1.2156                   | 1.1322  | -0.9032 | 0.0874  | 0.1141  | 0.0279  | 0.0547   | 0.0919  | -0.0084 | 0.1567  | 0.0053  | 0.0701  |
| 6 | 2.3506                    | -0.1980 | 0.0061  | -0.1674 | -0.3574 | -0.0050 | -0.0703  | -0.1266 | 0.0675  | -0.2429 | 0.5105  | -0.1009 |
| 1 | 2.4567                    | -0.7473 | 0.9493  | 0.0987  | 0.0984  | 0.0271  | 0.0612   | 0.0858  | 0.0267  | 0.1556  | 0.0005  | 0.0776  |
| 1 | 2.4421                    | -0.9170 | -0.8175 | 0.0960  | 0.0975  | 0.0257  | 0.0592   | 0.0844  | 0.0242  | 0.1537  | -0.0022 | 0.0761  |
| 1 | 3.1584                    | 0.5257  | -0.0706 | 0.1218  | 0.1099  | 0.0412  | 0.0906   | 0.1017  | 0.0663  | 0.1869  | 0.0271  | 0.0903  |
| 8 | -2.3972                   | -0.2787 | 0.0848  | -0.4529 | -0.0351 | -0.2303 | -0.6197  | -0.4490 | -0.6360 | -0.6880 | -1.0824 | -0.3963 |
| 1 | -2.4838                   | -0.7873 | -0.7236 | 0.2932  | 0.1661  | 0.1533  | 0.4061   | 0.3276  | 0.3861  | 0.4514  | 0.5541  | 0.2560  |

Dipole mement (in D) 2.00 (DEN) 1.75 0.69 0.97 2.22 2.08 2.04 3.27 4.50 1.90

-----  
File TZVPMol131.out

Molecule PMol131 benzyl\_alcohol  
SP Mol131 B3LYP/Def2TZVP VAC.

0 16

Dipole -1.1577 -1.3261 -0.0004 1.7603

Quadrupole 7.0030 -0.2664 -6.7367 3.3123 0.0019 0.0001

|   | Atomic coordinates (in A) |         |         | Mul.    | Lowdin  | Hirsch. | I-Hirsch | CM5     | ESP     | NPA     | AIM     | ACP     |
|---|---------------------------|---------|---------|---------|---------|---------|----------|---------|---------|---------|---------|---------|
| 6 | 1.8692                    | -0.9962 | -0.0000 | -0.0947 | -0.1430 | -0.0428 | -0.0841  | -0.0987 | -0.0446 | -0.2016 | -0.0262 | -0.0864 |
| 6 | 0.5159                    | -1.2918 | -0.0000 | -0.2088 | -0.1171 | -0.0465 | -0.1558  | -0.1002 | -0.3248 | -0.2059 | -0.0381 | -0.0959 |
| 6 | -0.4349                   | -0.2725 | 0.0000  | 0.1517  | -0.1504 | -0.0006 | 0.0801   | -0.0136 | 0.3109  | -0.0480 | -0.0160 | 0.0277  |
| 6 | -0.0069                   | 1.0494  | 0.0000  | -0.1842 | -0.1079 | -0.0427 | -0.1354  | -0.0952 | -0.2802 | -0.2032 | -0.0231 | -0.0950 |
| 6 | 1.3509                    | 1.3456  | 0.0000  | -0.0854 | -0.1390 | -0.0401 | -0.0832  | -0.0958 | -0.0634 | -0.1980 | -0.0264 | -0.0839 |

|   |         |         |         |         |         |         |         |         |         |         |         |         |
|---|---------|---------|---------|---------|---------|---------|---------|---------|---------|---------|---------|---------|
| 6 | 2.2921  | 0.3277  | -0.0000 | -0.1223 | -0.1467 | -0.0458 | -0.1059 | -0.1019 | -0.2299 | -0.2161 | -0.0299 | -0.0898 |
| 1 | 2.5959  | -1.7989 | -0.0001 | 0.1050  | 0.1412  | 0.0387  | 0.0917  | 0.0948  | 0.1192  | 0.2061  | 0.0258  | 0.0824  |
| 1 | 0.1898  | -2.3268 | -0.0000 | 0.0974  | 0.1435  | 0.0366  | 0.0896  | 0.0934  | 0.1333  | 0.2010  | 0.0173  | 0.0799  |
| 1 | -0.7436 | 1.8405  | 0.0001  | 0.1314  | 0.1502  | 0.0362  | 0.1152  | 0.0990  | 0.1707  | 0.2280  | 0.0634  | 0.0662  |
| 1 | 1.6725  | 2.3796  | 0.0000  | 0.1060  | 0.1416  | 0.0392  | 0.0913  | 0.0953  | 0.1183  | 0.2059  | 0.0263  | 0.0829  |
| 1 | 3.3492  | 0.5609  | -0.0000 | 0.1055  | 0.1404  | 0.0384  | 0.0914  | 0.0944  | 0.1430  | 0.2064  | 0.0257  | 0.0821  |
| 6 | -1.8907 | -0.6287 | 0.0001  | -0.0346 | -0.3015 | 0.0255  | 0.1103  | -0.0534 | 0.1400  | -0.0701 | 0.5171  | -0.0021 |
| 1 | -2.1114 | -1.2496 | -0.8791 | 0.0926  | 0.1230  | 0.0290  | 0.0519  | 0.0910  | 0.0147  | 0.1642  | 0.0046  | 0.0728  |
| 1 | -2.1113 | -1.2493 | 0.8795  | 0.0926  | 0.1230  | 0.0290  | 0.0519  | 0.0910  | 0.0147  | 0.1642  | 0.0046  | 0.0728  |
| 8 | -2.6769 | 0.5441  | -0.0001 | -0.4485 | -0.0253 | -0.2147 | -0.6276 | -0.4348 | -0.6418 | -0.6948 | -1.0869 | -0.3814 |
| 1 | -3.6001 | 0.2901  | -0.0004 | 0.2963  | 0.1680  | 0.1601  | 0.4182  | 0.3344  | 0.4199  | 0.4620  | 0.5624  | 0.2674  |

Dipole mement (in D) 1.76 (DEN) 1.60 1.36 1.03 2.02 1.84 1.74 2.48 3.17 1.79

-----  
File TZVPMol132.out

Molecule PMol132 diketene

SP Mol132 B3LYP/Def2TZVP VAC.

0 10

Dipole 2.6814 2.3529 -0.0012 3.5674

Quadrupole -3.7694 2.5398 1.2296 -1.1698 0.0017 0.0016

|   | Atomic coordinates (in A) |         |         | Mul.    | Lowdin  | Hirsch. | I-Hirsch | CM5     | ESP     | NPA     | AIM     | ACP     |
|---|---------------------------|---------|---------|---------|---------|---------|----------|---------|---------|---------|---------|---------|
| 6 | -1.0463                   | -0.0019 | -0.0007 | 0.2498  | -0.4198 | 0.2170  | 0.8021   | 0.2732  | 0.6871  | 0.7686  | 1.5591  | 0.4321  |
| 8 | -2.2137                   | -0.1839 | 0.0001  | -0.2237 | 0.1641  | -0.2409 | -0.5110  | -0.2839 | -0.4653 | -0.5013 | -1.1688 | -0.3727 |
| 6 | -0.0536                   | 1.1379  | -0.0000 | -0.2106 | -0.1600 | -0.0457 | -0.5170  | -0.1368 | -0.4828 | -0.5661 | 0.0016  | -0.1545 |
| 1 | -0.0879                   | 1.7694  | -0.8854 | 0.1350  | 0.1554  | 0.0645  | 0.1687   | 0.1213  | 0.1737  | 0.2481  | 0.0703  | 0.1090  |
| 1 | -0.0882                   | 1.7690  | 0.8857  | 0.1352  | 0.1555  | 0.0645  | 0.1689   | 0.1214  | 0.1740  | 0.2482  | 0.0705  | 0.1091  |
| 8 | -0.0394                   | -0.9653 | 0.0005  | -0.2355 | 0.3027  | -0.1187 | -0.3463  | -0.1757 | -0.3575 | -0.4509 | -1.0002 | -0.2537 |
| 6 | 2.2515                    | -0.1520 | -0.0001 | -0.3120 | -0.2000 | -0.1081 | -0.4497  | -0.2051 | -0.7480 | -0.4624 | -0.0107 | -0.2223 |
| 1 | 2.9163                    | 0.6974  | -0.0003 | 0.1288  | 0.1331  | 0.0465  | 0.1488   | 0.1007  | 0.2510  | 0.2146  | 0.0544  | 0.0941  |
| 1 | 2.6798                    | -1.1426 | 0.0001  | 0.1360  | 0.1341  | 0.0509  | 0.1569   | 0.1063  | 0.2712  | 0.2207  | 0.0672  | 0.0929  |
| 6 | 0.9492                    | 0.0327  | -0.0000 | 0.1969  | -0.2651 | 0.0699  | 0.3787   | 0.0785  | 0.4967  | 0.2805  | 0.3565  | 0.1659  |

Dipole mement (in D) 3.57 (DEN) 3.23 0.44 2.47 3.22 3.41 3.60 5.06 10.35 3.65

-----  
File TZVPMol133.out

Molecule PMol133 3-oxetanone

SP Mol133 B3LYP/Def2TZVP VAC.

0 9

Dipole 0.0000 0.0000 -1.0107 1.0107

Quadrupole 3.0690 5.4248 -8.4938 0.0000 0.0000 0.0000

|   | Atomic coordinates (in A) |         |         | Mul.    | Lowdin  | Hirsch. | I-Hirsch | CM5     | ESP     | NPA     | AIM     | ACP     |
|---|---------------------------|---------|---------|---------|---------|---------|----------|---------|---------|---------|---------|---------|
| 8 | 0.0000                    | 0.0000  | 1.8450  | -0.2315 | 0.1599  | -0.2345 | -0.4592  | -0.2799 | -0.4519 | -0.4778 | -1.1453 | -0.3600 |
| 6 | 0.0000                    | 0.0000  | 0.6536  | 0.1076  | -0.3320 | 0.1634  | 0.5453   | 0.1942  | 0.3605  | 0.5448  | 1.0946  | 0.3203  |
| 6 | 0.0000                    | 1.0452  | -0.4419 | 0.0160  | -0.2394 | 0.0248  | -0.1068  | -0.0487 | 0.1885  | -0.1867 | 0.4067  | -0.0195 |
| 6 | 0.0000                    | -1.0452 | -0.4419 | 0.0160  | -0.2394 | 0.0248  | -0.1068  | -0.0487 | 0.1885  | -0.1867 | 0.4072  | -0.0195 |
| 8 | 0.0000                    | 0.0000  | -1.4275 | -0.3382 | 0.1308  | -0.1868 | -0.2975  | -0.2707 | -0.4312 | -0.4803 | -0.9687 | -0.2968 |

|   |         |         |         |        |        |        |        |        |        |        |        |        |
|---|---------|---------|---------|--------|--------|--------|--------|--------|--------|--------|--------|--------|
| 1 | 0.8898  | 1.6801  | -0.4897 | 0.1075 | 0.1300 | 0.0521 | 0.1063 | 0.1135 | 0.0373 | 0.1966 | 0.0511 | 0.0939 |
| 1 | 0.8898  | -1.6801 | -0.4897 | 0.1075 | 0.1300 | 0.0521 | 0.1063 | 0.1135 | 0.0373 | 0.1966 | 0.0511 | 0.0939 |
| 1 | -0.8898 | 1.6801  | -0.4897 | 0.1075 | 0.1300 | 0.0521 | 0.1063 | 0.1135 | 0.0355 | 0.1966 | 0.0511 | 0.0939 |
| 1 | -0.8898 | -1.6801 | -0.4897 | 0.1075 | 0.1300 | 0.0521 | 0.1063 | 0.1135 | 0.0355 | 0.1966 | 0.0511 | 0.0939 |

Dipole mement (in D) 1.01 (DEN) 0.48 0.73 0.88 0.87 0.88 1.06 0.29 2.28 0.95

-----  
 File TZVPMol134.out  
 Molecule PMol134 2-furanone  
 SP Mol134 B3LYP/Def2TZVP VAC.  
 0 10

|            |                           |         |         |         |         |         |          |         |         |         |         |         |
|------------|---------------------------|---------|---------|---------|---------|---------|----------|---------|---------|---------|---------|---------|
| Dipole     | -4.8233                   | 1.4766  | -0.0002 | 5.0443  |         |         |          |         |         |         |         |         |
| Quadrupole | -2.2470                   | 1.7029  | 0.5441  | 1.5994  | -0.0006 | 0.0002  |          |         |         |         |         |         |
|            | Atomic coordinates (in A) |         |         | Mul.    | Lowdin  | Hirsch. | I-Hirsch | CM5     | ESP     | NPA     | AIM     | ACP     |
| 8          | 2.0342                    | -0.0420 | 0.0001  | -0.2788 | 0.1270  | -0.2772 | -0.5539  | -0.3189 | -0.5405 | -0.5373 | -1.1727 | -0.4063 |
| 6          | 0.8404                    | 0.0265  | -0.0001 | 0.2811  | -0.4550 | 0.1896  | 0.7723   | 0.2479  | 0.7635  | 0.7067  | 1.5395  | 0.4074  |
| 8          | 0.0402                    | -1.0936 | 0.0000  | -0.2441 | 0.2633  | -0.1289 | -0.3501  | -0.2031 | -0.3960 | -0.4537 | -1.0290 | -0.2594 |
| 6          | -0.0514                   | 1.1969  | 0.0000  | -0.1773 | -0.1217 | -0.0421 | -0.3278  | -0.0911 | -0.3224 | -0.3083 | -0.0277 | -0.0949 |
| 6          | -1.3116                   | 0.7767  | -0.0000 | -0.1330 | -0.1178 | -0.0096 | -0.0540  | -0.0660 | -0.1225 | -0.1456 | -0.0458 | -0.0526 |
| 6          | -1.3230                   | -0.7069 | 0.0000  | 0.0404  | -0.2638 | 0.0351  | 0.0286   | -0.0403 | 0.1849  | -0.1158 | 0.4783  | -0.0008 |
| 1          | 0.3230                    | 2.2071  | 0.0001  | 0.1407  | 0.1475  | 0.0641  | 0.1583   | 0.1218  | 0.1738  | 0.2333  | 0.0845  | 0.1046  |
| 1          | -2.2113                   | 1.3745  | 0.0000  | 0.1377  | 0.1426  | 0.0624  | 0.1268   | 0.1180  | 0.1383  | 0.2199  | 0.0715  | 0.1106  |
| 1          | -1.8166                   | -1.1281 | 0.8809  | 0.1167  | 0.1389  | 0.0533  | 0.1000   | 0.1159  | 0.0604  | 0.2004  | 0.0505  | 0.0958  |
| 1          | -1.8166                   | -1.1281 | -0.8808 | 0.1166  | 0.1389  | 0.0533  | 0.1000   | 0.1159  | 0.0604  | 0.2004  | 0.0505  | 0.0958  |

Dipole mement (in D) 5.04 (DEN) 4.38 1.94 3.72 5.14 4.74 5.06 6.68 10.78 4.95

-----  
 File TZVPMol135.out  
 Molecule PMol135 ketene  
 SP Mol135 B3LYP/Def2TZVP VAC.  
 0 5

|            |                           |         |         |         |         |         |          |         |         |         |         |         |
|------------|---------------------------|---------|---------|---------|---------|---------|----------|---------|---------|---------|---------|---------|
| Dipole     | 0.0000                    | 0.0000  | -1.4796 | 1.4796  |         |         |          |         |         |         |         |         |
| Quadrupole | -1.5238                   | 2.1462  | -0.6224 | 0.0000  | 0.0000  |         |          |         |         |         |         |         |
|            | Atomic coordinates (in A) |         |         | Mul.    | Lowdin  | Hirsch. | I-Hirsch | CM5     | ESP     | NPA     | AIM     | ACP     |
| 6          | 0.0000                    | 0.0000  | 0.1015  | 0.2608  | -0.2250 | 0.1987  | 0.6880   | 0.2314  | 0.7200  | 0.6955  | 0.8518  | 0.3513  |
| 8          | 0.0000                    | 0.0000  | 1.2612  | -0.1470 | 0.2323  | -0.1563 | -0.3730  | -0.2008 | -0.3528 | -0.4358 | -1.1359 | -0.2882 |
| 6          | 0.0000                    | 0.0000  | -1.2044 | -0.4312 | -0.3068 | -0.1634 | -0.7188  | -0.2604 | -1.0942 | -0.7793 | 0.0795  | -0.2751 |
| 1          | 0.0000                    | 0.9364  | -1.7363 | 0.1587  | 0.1498  | 0.0605  | 0.2019   | 0.1149  | 0.3635  | 0.2598  | 0.1023  | 0.1060  |
| 1          | 0.0000                    | -0.9364 | -1.7363 | 0.1587  | 0.1498  | 0.0605  | 0.2019   | 0.1149  | 0.3635  | 0.2598  | 0.1023  | 0.1060  |

Dipole mement (in D) 1.48 (DEN) 0.92 0.57 0.91 1.13 1.51 1.52 2.13 8.63 1.75

-----  
 File TZVPMol136.out  
 Molecule PMol136 methylketene  
 SP Mol136 B3LYP/Def2TZVP VAC.

```

0      8
Dipole      -1.8278   0.4369   0.0001   1.8793
Quadrupole  -1.8270   2.3580  -0.5311   0.8775  -0.0001   0.0003

  Atomic coordinates (in A)      Mul.      Lowdin      Hirsch.      I-Hirsch      CM5      ESP      NPA      AIM      ACP
6      0.7632   0.1226  -0.0000   0.2245  -0.2019   0.1847   0.6217   0.2193   0.4729   0.6868   0.8286   0.3294
8      1.8605  -0.2644   0.0000  -0.1623   0.2202  -0.1689  -0.3810  -0.2129  -0.3090  -0.4462  -1.1388  -0.2990
6     -0.4687   0.5605  -0.0000  -0.2582  -0.2726  -0.1085  -0.4706  -0.1660  -0.5496  -0.5379   0.1248  -0.1516
1     -0.5721   1.6373   0.0001   0.1461   0.1632   0.0538   0.1607   0.1109   0.2221   0.2523   0.0775   0.0961
6     -1.6789  -0.3241   0.0000  -0.3083  -0.2833  -0.0717  -0.2742  -0.2178   0.0475  -0.5824   0.0605  -0.2348
1     -2.3004  -0.1498   0.8791   0.1200   0.1234   0.0355   0.1138   0.0869   0.0288   0.2077   0.0150   0.0862
1     -2.3004  -0.1498  -0.8790   0.1200   0.1234   0.0355   0.1138   0.0869   0.0288   0.2077   0.0150   0.0862
1     -1.4047  -1.3762  -0.0000   0.1183   0.1275   0.0396   0.1158   0.0925   0.0585   0.2120   0.0174   0.0876

Dipole mement (in D)   1.88 (DEN)      1.45      0.44      1.23      1.63      1.87      1.87      2.39      8.97      2.07

```

-----  
File TZVPMol137.out

Molecule PMol137 formamide

SP Mol137 B3LYP/Def2TZVP VAC.

```

0      6
Dipole      3.8690   0.8375   0.0030   3.9586
Quadrupole  -0.4920   1.9621  -1.4702  -1.2063   0.0050  -0.0007

  Atomic coordinates (in A)      Mul.      Lowdin      Hirsch.      I-Hirsch      CM5      ESP      NPA      AIM      ACP
6     -0.1631   0.3841   0.0001   0.1927  -0.4589   0.1382   0.6597   0.1927   0.6135   0.5062   1.4976   0.3299
8     -1.1928  -0.2447  -0.0001  -0.3321   0.0530  -0.3030  -0.5400  -0.3519  -0.5284  -0.5797  -1.1801  -0.4095
7      1.0798  -0.1570  -0.0002  -0.3816  -0.0220  -0.1348  -0.8927  -0.5971  -0.8790  -0.7981  -1.1689  -0.5185
1     -0.1275   1.4920  -0.0001   0.0529   0.1019   0.0376   0.0170   0.1091  -0.0030   0.0920   0.0272   0.0815
1      1.1883  -1.1566   0.0006   0.2349   0.1646   0.1324   0.3850   0.3257   0.4172   0.3929   0.4169   0.2539
1      1.9024   0.4165   0.0009   0.2334   0.1614   0.1296   0.3710   0.3214   0.3797   0.3867   0.4072   0.2628

Dipole mement (in D)   3.96 (DEN)      3.26      2.41      2.89      3.74      3.60      3.93      4.74      6.73      3.41

```

-----  
File TZVPMol138.out

Molecule PMol138 acetamide

SP Mol138 B3LYP/Def2TZVP VAC.

```

0      9
Dipole      -0.1321  -3.8825  -0.0005   3.8847
Quadrupole   3.4390  -2.3399  -1.0990  -2.3860  -0.0009   0.0010

  Atomic coordinates (in A)      Mul.      Lowdin      Hirsch.      I-Hirsch      CM5      ESP      NPA      AIM      ACP
6      0.0733   0.1486  -0.0000   0.2931  -0.5130   0.1666   0.8615   0.2543   0.8773   0.6436   1.4683   0.4308
8      0.3564   1.3284  -0.0000  -0.3518   0.0652  -0.3204  -0.5860  -0.3644  -0.6018  -0.5979  -1.1972  -0.4308
7      1.0269  -0.8264   0.0001  -0.4199  -0.0035  -0.1415  -0.9286  -0.6001  -1.0045  -0.7995  -1.1606  -0.5331
1      1.9937  -0.5541  -0.0001   0.2337   0.1656   0.1282   0.3849   0.3227   0.4241   0.3949   0.4143   0.2486
1      0.8041  -1.8034  -0.0003   0.2285   0.1609   0.1231   0.3728   0.3163   0.4145   0.3840   0.4019   0.2553
6     -1.3509  -0.3431  -0.0000  -0.3350  -0.2649  -0.0873  -0.5307  -0.2257  -0.5711  -0.6936  -0.0111  -0.2510
1     -1.8621   0.0554  -0.8735   0.1314   0.1369   0.0492   0.1491   0.1041   0.1599   0.2351   0.0431   0.0958
1     -1.4477  -1.4268  -0.0006   0.0888   0.1159   0.0328   0.1280   0.0886   0.1418   0.1983  -0.0018   0.0887

```

|                      |            |        |        |        |        |        |        |        |        |        |        |        |
|----------------------|------------|--------|--------|--------|--------|--------|--------|--------|--------|--------|--------|--------|
| 1                    | -1.8616    | 0.0543 | 0.8743 | 0.1314 | 0.1369 | 0.0492 | 0.1491 | 0.1041 | 0.1599 | 0.2351 | 0.0431 | 0.0958 |
| Dipole moment (in D) | 3.88 (DEN) |        | 2.97   | 2.14   | 2.83   | 3.63   | 3.55   | 3.89   | 4.68   | 6.95   | 3.39   |        |

-----  
File TZVPMol139.out  
Molecule PMol139 N-methylformamide  
SP Mol139 B3LYP/Def2TZVP VAC.

|                      |                           |         |         |         |         |         |          |         |         |         |         |         |
|----------------------|---------------------------|---------|---------|---------|---------|---------|----------|---------|---------|---------|---------|---------|
| 0                    | 9                         |         |         |         |         |         |          |         |         |         |         |         |
| Dipole               | 4.1860                    | 0.0832  | 0.0008  | 4.1868  |         |         |          |         |         |         |         |         |
| Quadrupole           | -4.4913                   | 3.9009  | 0.5904  | -0.9826 | -0.0005 | -0.0011 |          |         |         |         |         |         |
|                      | Atomic coordinates (in A) |         |         | Mul.    | Lowdin  | Hirsch. | I-Hirsch | CM5     | ESP     | NPA     | AIM     | ACP     |
| 6                    | -0.7292                   | 0.3410  | 0.0001  | 0.1645  | -0.4383 | 0.1327  | 0.5889   | 0.1893  | 0.4036  | 0.5108  | 1.4810  | 0.3170  |
| 8                    | -1.8585                   | -0.0885 | -0.0002 | -0.3382 | 0.0469  | -0.3115 | -0.5548  | -0.3603 | -0.5202 | -0.5873 | -1.1870 | -0.4172 |
| 7                    | 0.3978                    | -0.4130 | -0.0001 | -0.2310 | 0.0798  | -0.0805 | -0.5503  | -0.4514 | -0.3536 | -0.5897 | -1.1522 | -0.4124 |
| 1                    | -0.4867                   | 1.4249  | -0.0006 | 0.0447  | 0.1034  | 0.0344  | 0.0122   | 0.1069  | 0.0474  | 0.0880  | 0.0205  | 0.0760  |
| 1                    | 0.2640                    | -1.4118 | 0.0003  | 0.2106  | 0.1788  | 0.1312  | 0.3368   | 0.3280  | 0.3019  | 0.3908  | 0.4021  | 0.2469  |
| 6                    | 1.7353                    | 0.1180  | 0.0002  | -0.2140 | -0.3153 | -0.0263 | -0.1411  | -0.1160 | -0.0930 | -0.3976 | 0.3658  | -0.1100 |
| 1                    | 2.2959                    | -0.1862 | 0.8849  | 0.1244  | 0.1121  | 0.0377  | 0.1001   | 0.0979  | 0.0694  | 0.1911  | 0.0194  | 0.0976  |
| 1                    | 2.2965                    | -0.1871 | -0.8838 | 0.1244  | 0.1121  | 0.0377  | 0.1001   | 0.0979  | 0.0695  | 0.1911  | 0.0195  | 0.0976  |
| 1                    | 1.6771                    | 1.2048  | -0.0004 | 0.1147  | 0.1206  | 0.0447  | 0.1080   | 0.1076  | 0.0750  | 0.2027  | 0.0304  | 0.1046  |
| Dipole moment (in D) | 4.19 (DEN)                |         | 4.05    | 2.34    | 3.22    | 4.17    | 3.92     | 4.19    | 5.21    | 7.97    | 4.10    |         |

-----  
File TZVPMol140.out  
Molecule PMol140 N,N-dimethylformamide  
SP Mol1010 B3LYP/Def2TZVP VAC.

|                      |                           |         |         |         |         |         |          |         |         |         |         |         |
|----------------------|---------------------------|---------|---------|---------|---------|---------|----------|---------|---------|---------|---------|---------|
| 0                    | 12                        |         |         |         |         |         |          |         |         |         |         |         |
| Dipole               | -3.9859                   | -0.3767 | -0.0005 | 4.0037  |         |         |          |         |         |         |         |         |
| Quadrupole           | -5.2325                   | 4.2367  | 0.9958  | 0.0559  | -0.0017 | -0.0002 |          |         |         |         |         |         |
|                      | Atomic coordinates (in A) |         |         | Mul.    | Lowdin  | Hirsch. | I-Hirsch | CM5     | ESP     | NPA     | AIM     | ACP     |
| 6                    | 0.8630                    | -0.6426 | -0.0003 | 0.1469  | -0.4185 | 0.1306  | 0.5023   | 0.1888  | 0.3116  | 0.5138  | 1.4562  | 0.3090  |
| 8                    | 1.9423                    | -0.0944 | 0.0003  | -0.3565 | 0.0444  | -0.3033 | -0.5503  | -0.3550 | -0.5003 | -0.5988 | -1.1895 | -0.4049 |
| 7                    | -0.3445                   | -0.0186 | -0.0001 | -0.0819 | 0.1299  | -0.0321 | -0.1310  | -0.3145 | 0.0934  | -0.4060 | -1.1415 | -0.3046 |
| 1                    | 0.7411                    | -1.7443 | 0.0003  | 0.0521  | 0.1089  | 0.0335  | 0.0095   | 0.1066  | 0.0337  | 0.0959  | 0.0199  | 0.0752  |
| 6                    | -1.5784                   | -0.7584 | -0.0000 | -0.2404 | -0.2906 | -0.0284 | -0.2225  | -0.1157 | -0.3892 | -0.3894 | 0.3583  | -0.1161 |
| 1                    | -2.1794                   | -0.5288 | 0.8832  | 0.1195  | 0.1137  | 0.0361  | 0.0973   | 0.0970  | 0.1307  | 0.1880  | 0.0151  | 0.0939  |
| 1                    | -2.1796                   | -0.5287 | -0.8830 | 0.1195  | 0.1137  | 0.0360  | 0.0973   | 0.0970  | 0.1306  | 0.1880  | 0.0151  | 0.0939  |
| 1                    | -1.3631                   | -1.8251 | -0.0001 | 0.1151  | 0.1205  | 0.0431  | 0.1023   | 0.1060  | 0.1257  | 0.2050  | 0.0277  | 0.1026  |
| 6                    | -0.4227                   | 1.4220  | -0.0000 | -0.2641 | -0.2820 | -0.0312 | -0.2317  | -0.1177 | -0.2462 | -0.4122 | 0.3337  | -0.1221 |
| 1                    | 0.5876                    | 1.8204  | -0.0001 | 0.1615  | 0.1320  | 0.0452  | 0.1322   | 0.1142  | 0.1283  | 0.2391  | 0.0808  | 0.0875  |
| 1                    | -0.9524                   | 1.7830  | -0.8838 | 0.1142  | 0.1140  | 0.0353  | 0.0973   | 0.0966  | 0.0909  | 0.1884  | 0.0119  | 0.0928  |
| 1                    | -0.9522                   | 1.7829  | 0.8840  | 0.1142  | 0.1140  | 0.0353  | 0.0973   | 0.0966  | 0.0909  | 0.1884  | 0.0120  | 0.0928  |
| Dipole moment (in D) | 4.00 (DEN)                |         | 3.88    | 2.41    | 3.08    | 3.93    | 3.82     | 4.01    | 5.06    | 7.30    | 3.92    |         |



File TZVPMol141.out

Molecule PMol141 E-N-methylacetamide

SP Mol141 B3LYP/Def2TZVP VAC.

0 12

Dipole -3.7939 1.5418 0.0304 4.0953

Quadrupole -2.2810 1.9063 0.3747 4.8108 -0.0797 -0.1380

|   | Atomic coordinates (in A) |         |         | Mul.    | Lowdin  | Hirsch. | I-Hirsch | CM5     | ESP     | NPA     | AIM     | ACP     |
|---|---------------------------|---------|---------|---------|---------|---------|----------|---------|---------|---------|---------|---------|
| 6 | 0.6255                    | -0.1569 | -0.0033 | 0.2427  | -0.4878 | 0.1631  | 0.7903   | 0.2523  | 0.6973  | 0.6474  | 1.4412  | 0.4188  |
| 8 | 1.6077                    | -0.8738 | 0.0219  | -0.3527 | 0.0603  | -0.3231 | -0.5936  | -0.3673 | -0.6033 | -0.5997 | -1.1953 | -0.4304 |
| 7 | -0.6365                   | -0.6792 | -0.0474 | -0.2579 | 0.0911  | -0.0917 | -0.5990  | -0.4569 | -0.4855 | -0.5970 | -1.1384 | -0.4295 |
| 1 | -0.6693                   | -1.6837 | 0.0046  | 0.2141  | 0.1812  | 0.1243  | 0.3354   | 0.3230  | 0.3061  | 0.3938  | 0.4014  | 0.2380  |
| 6 | 0.7054                    | 1.3471  | -0.0053 | -0.3596 | -0.2629 | -0.0869 | -0.5452  | -0.2253 | -0.4366 | -0.7012 | -0.0169 | -0.2523 |
| 1 | 0.2866                    | 1.7616  | -0.9228 | 0.1242  | 0.1302  | 0.0418  | 0.1376   | 0.0968  | 0.1317  | 0.2204  | 0.0215  | 0.0938  |
| 1 | 0.1438                    | 1.7805  | 0.8225  | 0.1186  | 0.1291  | 0.0401  | 0.1361   | 0.0954  | 0.1238  | 0.2181  | 0.0197  | 0.0917  |
| 1 | 1.7440                    | 1.6474  | 0.0725  | 0.1369  | 0.1333  | 0.0468  | 0.1528   | 0.1031  | 0.1310  | 0.2368  | 0.0474  | 0.0896  |
| 6 | -1.8739                   | 0.0576  | 0.0229  | -0.2437 | -0.3184 | -0.0290 | -0.1271  | -0.1192 | -0.0878 | -0.4026 | 0.3629  | -0.1131 |
| 1 | -2.6975                   | -0.5942 | -0.2556 | 0.1283  | 0.1187  | 0.0452  | 0.1131   | 0.1068  | 0.0987  | 0.2064  | 0.0270  | 0.1073  |
| 1 | -2.0819                   | 0.4505  | 1.0225  | 0.1259  | 0.1093  | 0.0316  | 0.0926   | 0.0915  | 0.0657  | 0.1824  | 0.0093  | 0.0895  |
| 1 | -1.8738                   | 0.8959  | -0.6730 | 0.1233  | 0.1159  | 0.0378  | 0.1070   | 0.0998  | 0.0589  | 0.1951  | 0.0215  | 0.0965  |

Dipole moment (in D) 4.10 (DEN) 3.89 2.19 3.13 4.21 3.85 4.17 5.27 8.08 4.04

-----  
File TZVPMol142.out

Molecule PMol142 Z-N-methylacetamide

SP Mol142 B3LYP/Def2TZVP VAC.

0 12

Dipole 0.6602 -3.8293 0.0019 3.8858

Quadrupole 3.5413 -2.9126 -0.6287 0.7339 -0.0009 -0.0066

|   | Atomic coordinates (in A) |         |         | Mul.    | Lowdin  | Hirsch. | I-Hirsch | CM5     | ESP     | NPA     | AIM     | ACP     |
|---|---------------------------|---------|---------|---------|---------|---------|----------|---------|---------|---------|---------|---------|
| 6 | -0.4818                   | 0.1634  | 0.0002  | 0.3135  | -0.4878 | 0.1615  | 0.7797   | 0.2518  | 0.7213  | 0.6398  | 1.4449  | 0.4206  |
| 8 | -0.3709                   | 1.3757  | 0.0000  | -0.3764 | 0.0630  | -0.3160 | -0.5858  | -0.3605 | -0.5597 | -0.6115 | -1.1961 | -0.4248 |
| 7 | 0.6070                    | -0.6528 | -0.0004 | -0.3114 | 0.0875  | -0.0874 | -0.5826  | -0.4558 | -0.4071 | -0.5873 | -1.1467 | -0.4258 |
| 6 | -1.8184                   | -0.5310 | 0.0001  | -0.3464 | -0.2648 | -0.0885 | -0.5344  | -0.2268 | -0.7017 | -0.6846 | -0.0103 | -0.2520 |
| 1 | -2.3822                   | -0.2169 | -0.8756 | 0.1304  | 0.1356  | 0.0476  | 0.1475   | 0.1025  | 0.2003  | 0.2328  | 0.0401  | 0.0941  |
| 1 | -1.7535                   | -1.6174 | 0.0028  | 0.0891  | 0.1154  | 0.0319  | 0.1207   | 0.0876  | 0.1522  | 0.1968  | -0.0045 | 0.0875  |
| 1 | -2.3848                   | -0.2123 | 0.8723  | 0.1305  | 0.1356  | 0.0476  | 0.1475   | 0.1024  | 0.2004  | 0.2328  | 0.0402  | 0.0941  |
| 1 | 0.4818                    | -1.6480 | 0.0016  | 0.2096  | 0.1751  | 0.1207  | 0.3236   | 0.3176  | 0.3031  | 0.3853  | 0.3903  | 0.2479  |
| 6 | 1.9443                    | -0.1077 | 0.0001  | -0.2043 | -0.3077 | -0.0321 | -0.1403  | -0.1211 | -0.3312 | -0.4025 | 0.3588  | -0.1176 |
| 1 | 2.1162                    | 0.5091  | 0.8819  | 0.1281  | 0.1177  | 0.0377  | 0.1101   | 0.1006  | 0.1427  | 0.2016  | 0.0348  | 0.0876  |
| 1 | 2.6649                    | -0.9200 | -0.0076 | 0.1086  | 0.1126  | 0.0390  | 0.1033   | 0.1008  | 0.1368  | 0.1945  | 0.0133  | 0.1008  |
| 1 | 2.1108                    | 0.5210  | -0.8743 | 0.1287  | 0.1180  | 0.0379  | 0.1107   | 0.1009  | 0.1429  | 0.2023  | 0.0357  | 0.0877  |

Dipole moment (in D) 3.89 (DEN) 2.88 2.08 2.79 3.80 3.51 3.84 4.70 6.36 3.31

-----  
File TZVPMol143.out

Molecule PMol143 N,N-dimethylacetamide

SP Mol143 B3LYP/Def2TZVP VAC.

0 15

Dipole -1.8777 3.3459 0.0000 3.8368

Quadrupole 1.6144 -2.2569 0.6425 4.1813 -0.0008 -0.0011

|   | Atomic coordinates (in A) |         |         | Mul.    | Lowdin  | Hirsch. | I-Hirsch | CM5     | ESP     | NPA     | AIM     | ACP     |
|---|---------------------------|---------|---------|---------|---------|---------|----------|---------|---------|---------|---------|---------|
| 6 | 0.7302                    | -0.2956 | -0.0003 | 0.2630  | -0.4588 | 0.1637  | 0.7074   | 0.2545  | 0.5799  | 0.6518  | 1.4152  | 0.4138  |
| 8 | 1.0650                    | -1.4675 | 0.0006  | -0.3768 | 0.0576  | -0.3098 | -0.5868  | -0.3581 | -0.5685 | -0.6133 | -1.1958 | -0.4131 |
| 7 | -0.5891                   | 0.0799  | -0.0022 | -0.1043 | 0.1474  | -0.0396 | -0.1804  | -0.3139 | -0.0177 | -0.4098 | -1.1238 | -0.3174 |
| 6 | 1.7569                    | 0.8107  | -0.0001 | -0.3978 | -0.2675 | -0.0877 | -0.5484  | -0.2271 | -0.4175 | -0.6928 | -0.0132 | -0.2536 |
| 1 | 1.6710                    | 1.4494  | -0.8788 | 0.1256  | 0.1276  | 0.0402  | 0.1330   | 0.0950  | 0.1122  | 0.2175  | 0.0178  | 0.0922  |
| 1 | 1.6685                    | 1.4516  | 0.8767  | 0.1257  | 0.1276  | 0.0401  | 0.1330   | 0.0950  | 0.1125  | 0.2174  | 0.0178  | 0.0921  |
| 1 | 2.7402                    | 0.3543  | 0.0018  | 0.1388  | 0.1340  | 0.0456  | 0.1532   | 0.1024  | 0.1284  | 0.2376  | 0.0475  | 0.0877  |
| 6 | -1.6165                   | -0.9362 | 0.0004  | -0.2604 | -0.2841 | -0.0361 | -0.2240  | -0.1229 | -0.3191 | -0.4083 | 0.3310  | -0.1268 |
| 1 | -1.1438                   | -1.9122 | -0.0021 | 0.1644  | 0.1318  | 0.0419  | 0.1316   | 0.1123  | 0.1399  | 0.2433  | 0.0863  | 0.0836  |
| 1 | -2.2496                   | -0.8435 | 0.8860  | 0.1090  | 0.1119  | 0.0317  | 0.0925   | 0.0931  | 0.1099  | 0.1837  | 0.0049  | 0.0888  |
| 1 | -2.2555                   | -0.8415 | -0.8806 | 0.1091  | 0.1119  | 0.0317  | 0.0925   | 0.0931  | 0.1095  | 0.1838  | 0.0050  | 0.0889  |
| 6 | -1.0701                   | 1.4388  | 0.0007  | -0.2695 | -0.2902 | -0.0310 | -0.2081  | -0.1190 | -0.2886 | -0.3936 | 0.3551  | -0.1205 |
| 1 | -1.6979                   | 1.6302  | -0.8741 | 0.1191  | 0.1142  | 0.0340  | 0.0953   | 0.0951  | 0.1076  | 0.1871  | 0.0113  | 0.0916  |
| 1 | -1.6785                   | 1.6351  | 0.8882  | 0.1191  | 0.1140  | 0.0338  | 0.0949   | 0.0949  | 0.1071  | 0.1866  | 0.0109  | 0.0913  |
| 1 | -0.2535                   | 2.1509  | -0.0106 | 0.1349  | 0.1225  | 0.0417  | 0.1146   | 0.1058  | 0.1043  | 0.2090  | 0.0309  | 0.1017  |

Dipole moment (in D) 3.84 (DEN) 3.59 2.20 2.90 3.93 3.67 3.87 5.03 7.29 3.77

-----  
File TZVPMol144.out

Molecule PMol144 benzamide

SP Mol144 B3LYP/Def2TZVP VAC.

0 16

Dipole -1.5007 3.1251 1.1172 3.6423

Quadrupole 2.6992 2.1328 -4.8321 8.6968 3.0020 0.1670

|   | Atomic coordinates (in A) |         |         | Mul.    | Lowdin  | Hirsch. | I-Hirsch | CM5     | ESP     | NPA     | AIM     | ACP     |
|---|---------------------------|---------|---------|---------|---------|---------|----------|---------|---------|---------|---------|---------|
| 6 | 1.7091                    | -0.1402 | -0.0269 | 0.2708  | -0.4371 | 0.1613  | 0.7880   | 0.2564  | 0.5203  | 0.6296  | 1.4433  | 0.4140  |
| 8 | 2.2709                    | -1.2011 | -0.2247 | -0.3469 | 0.0767  | -0.3028 | -0.5776  | -0.3470 | -0.5079 | -0.5912 | -1.1820 | -0.4085 |
| 7 | 2.4089                    | 1.0183  | 0.1699  | -0.4065 | 0.0016  | -0.1432 | -0.9390  | -0.6002 | -0.7792 | -0.7948 | -1.1415 | -0.5363 |
| 1 | 3.4045                    | 0.9290  | 0.2707  | 0.2312  | 0.1677  | 0.1285  | 0.3860   | 0.3235  | 0.3844  | 0.3960  | 0.4134  | 0.2480  |
| 1 | 1.9795                    | 1.8282  | 0.5768  | 0.2267  | 0.1609  | 0.1179  | 0.3596   | 0.3118  | 0.3155  | 0.3828  | 0.3983  | 0.2457  |
| 6 | 0.2209                    | -0.0223 | -0.0120 | 0.0785  | -0.1200 | -0.0151 | -0.0990  | -0.0167 | 0.1171  | -0.1471 | -0.0260 | 0.0107  |
| 6 | -0.4568                   | 1.1922  | -0.1142 | -0.1773 | -0.1092 | -0.0376 | -0.0816  | -0.0895 | -0.2025 | -0.1863 | -0.0320 | -0.0856 |
| 6 | -1.8432                   | 1.2256  | -0.1021 | -0.1128 | -0.1373 | -0.0383 | -0.1010  | -0.0943 | -0.0982 | -0.2082 | -0.0217 | -0.0832 |
| 6 | -2.5651                   | 0.0460  | 0.0170  | -0.1081 | -0.1277 | -0.0299 | -0.0734  | -0.0859 | -0.1078 | -0.1883 | -0.0237 | -0.0743 |
| 6 | -1.8969                   | -1.1684 | 0.1133  | -0.0786 | -0.1311 | -0.0333 | -0.0929  | -0.0891 | -0.0948 | -0.2050 | -0.0197 | -0.0787 |
| 6 | -0.5130                   | -1.2022 | 0.0928  | -0.1640 | -0.0762 | -0.0231 | -0.0755  | -0.0748 | -0.1407 | -0.1564 | -0.0122 | -0.0747 |
| 1 | 0.0908                    | 2.1188  | -0.2382 | 0.1014  | 0.1416  | 0.0376  | 0.0986   | 0.0980  | 0.1394  | 0.2011  | 0.0199  | 0.0843  |
| 1 | -2.3605                   | 2.1721  | -0.1930 | 0.1120  | 0.1437  | 0.0428  | 0.0968   | 0.0989  | 0.1106  | 0.2104  | 0.0334  | 0.0872  |
| 1 | -3.6472                   | 0.0732  | 0.0284  | 0.1150  | 0.1439  | 0.0443  | 0.0964   | 0.1004  | 0.1136  | 0.2100  | 0.0351  | 0.0889  |
| 1 | -2.4584                   | -2.0897 | 0.2014  | 0.1152  | 0.1447  | 0.0447  | 0.0983   | 0.1008  | 0.1133  | 0.2116  | 0.0362  | 0.0892  |
| 1 | 0.0320                    | -2.1351 | 0.1546  | 0.1434  | 0.1577  | 0.0463  | 0.1166   | 0.1078  | 0.1169  | 0.2357  | 0.0790  | 0.0734  |

Dipole mement (in D) 3.64 (DEN) 2.55 1.79 2.66 3.67 3.35 3.66 4.55 6.80 3.35

-----  
File TZVPMol145.out

Molecule PMol145 phenylurea

SP Mol145 B3LYP/Def2TZVP VAC.

0 18

Dipole 0.9521 -3.6698 1.0062 3.9225

Quadrupole 7.0371 0.5815 -7.6186 -8.3894 3.9905 -0.5520

|   | Atomic coordinates (in A) |         |         | Mul.    | Lowdin  | Hirsch. | I-Hirsch | CM5     | ESP     | NPA     | AIM     | ACP     |
|---|---------------------------|---------|---------|---------|---------|---------|----------|---------|---------|---------|---------|---------|
| 6 | -2.5851                   | -1.0311 | -0.0398 | -0.0990 | -0.1432 | -0.0413 | -0.0639  | -0.0970 | -0.0463 | -0.1908 | -0.0192 | -0.0840 |
| 6 | -3.0192                   | 0.2869  | 0.0017  | -0.1399 | -0.1551 | -0.0530 | -0.1293  | -0.1090 | -0.2149 | -0.2342 | -0.0292 | -0.0975 |
| 6 | -2.0773                   | 1.3044  | 0.0488  | -0.0807 | -0.1353 | -0.0355 | -0.0531  | -0.0911 | -0.0710 | -0.1826 | -0.0200 | -0.0790 |
| 6 | -0.7167                   | 1.0333  | 0.0550  | -0.2110 | -0.1098 | -0.0523 | -0.2209  | -0.1005 | -0.3259 | -0.2412 | -0.0142 | -0.1010 |
| 6 | -0.2851                   | -0.2933 | 0.0129  | 0.2620  | -0.1873 | 0.0462  | 0.3567   | 0.0994  | 0.6152  | 0.1451  | 0.3542  | 0.1602  |
| 6 | -1.2320                   | -1.3199 | -0.0340 | -0.2234 | -0.1337 | -0.0625 | -0.2224  | -0.1108 | -0.3957 | -0.2453 | -0.0323 | -0.1055 |
| 7 | 1.0634                    | -0.6704 | 0.0301  | -0.2897 | 0.1668  | -0.0826 | -0.7045  | -0.4262 | -0.8303 | -0.5839 | -1.1543 | -0.4210 |
| 6 | 2.1818                    | 0.1371  | -0.0198 | 0.3997  | -0.5578 | 0.1929  | 1.0077   | 0.3493  | 0.8390  | 0.7539  | 1.8422  | 0.5351  |
| 7 | 3.3629                    | -0.5875 | -0.0146 | -0.4651 | -0.0435 | -0.1670 | -0.9636  | -0.6151 | -0.8410 | -0.8213 | -1.0969 | -0.5455 |
| 8 | 2.1618                    | 1.3455  | -0.1052 | -0.3819 | 0.0627  | -0.3024 | -0.6164  | -0.3465 | -0.5662 | -0.6191 | -1.2055 | -0.4006 |
| 1 | 1.2214                    | -1.6621 | -0.0283 | 0.1952  | 0.1878  | 0.1219  | 0.3433   | 0.3250  | 0.4097  | 0.3820  | 0.3849  | 0.2466  |
| 1 | 4.1739                    | -0.0136 | 0.1371  | 0.2414  | 0.1705  | 0.1267  | 0.3822   | 0.3227  | 0.3652  | 0.3948  | 0.4106  | 0.2467  |
| 1 | 3.3937                    | -1.4749 | 0.4574  | 0.2180  | 0.1567  | 0.1175  | 0.3631   | 0.3126  | 0.3444  | 0.3718  | 0.3820  | 0.2516  |
| 1 | 0.0098                    | 1.8286  | 0.0851  | 0.1651  | 0.1555  | 0.0368  | 0.1355   | 0.1045  | 0.1945  | 0.2509  | 0.1014  | 0.0628  |
| 1 | -0.8974                   | -2.3513 | -0.0662 | 0.0886  | 0.1384  | 0.0337  | 0.1006   | 0.0932  | 0.1487  | 0.1959  | 0.0094  | 0.0792  |
| 1 | -2.4011                   | 2.3372  | 0.0806  | 0.1095  | 0.1442  | 0.0419  | 0.0957   | 0.0981  | 0.1207  | 0.2081  | 0.0304  | 0.0858  |
| 1 | -4.0764                   | 0.5159  | -0.0035 | 0.1052  | 0.1403  | 0.0382  | 0.0936   | 0.0943  | 0.1321  | 0.2082  | 0.0271  | 0.0819  |
| 1 | -3.3012                   | -1.8421 | -0.0775 | 0.1058  | 0.1427  | 0.0405  | 0.0954   | 0.0967  | 0.1220  | 0.2077  | 0.0286  | 0.0844  |

Dipole mement (in D) 3.92 (DEN) 2.68 2.80 3.00 3.77 3.85 3.93 4.58 5.34 3.47

-----  
File TZVPMol146.out

Molecule PMol146 nitromethane

SP Mol146 B3LYP/Def2TZVP VAC.

0 7

Dipole 3.5702 -0.1100 0.0000 3.5719

Quadrupole 1.2689 -3.1080 1.8392 -0.0923 0.0002 0.0000

|   | Atomic coordinates (in A) |         |         | Mul.    | Lowdin  | Hirsch. | I-Hirsch | CM5     | ESP     | NPA     | AIM     | ACP     |
|---|---------------------------|---------|---------|---------|---------|---------|----------|---------|---------|---------|---------|---------|
| 7 | -0.1756                   | 0.0001  | -0.0000 | 0.3821  | -0.0862 | 0.2501  | 0.7822   | 0.0661  | 0.7896  | 0.5101  | 0.4816  | 0.2455  |
| 8 | -0.6844                   | 1.1070  | 0.0000  | -0.2931 | -0.0267 | -0.2100 | -0.4151  | -0.1713 | -0.4368 | -0.3610 | -0.4783 | -0.2383 |
| 8 | -0.7711                   | -1.0621 | 0.0000  | -0.2971 | -0.0233 | -0.2050 | -0.4087  | -0.1660 | -0.4260 | -0.3533 | -0.4725 | -0.2323 |
| 6 | 1.3191                    | -0.0430 | -0.0000 | -0.2454 | -0.2474 | -0.0200 | -0.4371  | -0.1097 | -0.4003 | -0.4752 | 0.2391  | -0.1224 |
| 1 | 1.6411                    | -1.0761 | -0.0008 | 0.1513  | 0.1237  | 0.0580  | 0.1572   | 0.1240  | 0.1531  | 0.2230  | 0.0777  | 0.1097  |
| 1 | 1.6584                    | 0.4877  | -0.8835 | 0.1510  | 0.1300  | 0.0634  | 0.1608   | 0.1285  | 0.1601  | 0.2282  | 0.0764  | 0.1189  |
| 1 | 1.6583                    | 0.4862  | 0.8844  | 0.1510  | 0.1300  | 0.0634  | 0.1608   | 0.1285  | 0.1602  | 0.2282  | 0.0764  | 0.1189  |

Dipole mement (in D) 3.57 (DEN) 3.79 1.73 2.58 3.25 3.45 3.57 4.45 6.27 3.42

-----  
File TZVPMol147.out

Molecule PMol147 nitroethane

SP Mol147 B3LYP/Def2TZVP VAC.

0 10

Dipole 3.3345 -1.6573 0.0000 3.7236

Quadrupole -1.8448 -0.9485 2.7933 -1.0293 0.0000 0.0000

|   | Atomic coordinates (in A) |         |         | Mul.    | Lowdin  | Hirsch. | I-Hirsch | CM5     | ESP     | NPA     | AIM     | ACP     |
|---|---------------------------|---------|---------|---------|---------|---------|----------|---------|---------|---------|---------|---------|
| 7 | -0.6531                   | 0.0536  | -0.0000 | 0.3929  | -0.0669 | 0.2475  | 0.7558   | 0.0678  | 0.7256  | 0.5136  | 0.4917  | 0.2411  |
| 8 | -0.5668                   | 1.2679  | 0.0000  | -0.2989 | -0.0158 | -0.1952 | -0.3975  | -0.1572 | -0.4190 | -0.3581 | -0.4781 | -0.2222 |
| 8 | -1.6880                   | -0.5890 | -0.0000 | -0.3020 | -0.0287 | -0.2135 | -0.4290  | -0.1751 | -0.4553 | -0.3648 | -0.4842 | -0.2405 |
| 6 | 0.6306                    | -0.7546 | 0.0000  | -0.1409 | -0.2555 | 0.0087  | -0.2107  | -0.0451 | 0.0584  | -0.2827 | 0.2367  | -0.0201 |
| 6 | 1.8635                    | 0.0976  | -0.0000 | -0.2971 | -0.3047 | -0.0830 | -0.3737  | -0.2286 | -0.2073 | -0.6149 | 0.0296  | -0.2461 |
| 1 | 0.5431                    | -1.3975 | -0.8740 | 0.1385  | 0.1443  | 0.0557  | 0.1323   | 0.1245  | 0.0412  | 0.2233  | 0.0615  | 0.1076  |
| 1 | 0.5431                    | -1.3975 | 0.8740  | 0.1385  | 0.1443  | 0.0557  | 0.1323   | 0.1245  | 0.0412  | 0.2233  | 0.0615  | 0.1076  |
| 1 | 2.7439                    | -0.5425 | 0.0000  | 0.1164  | 0.1283  | 0.0433  | 0.1291   | 0.0956  | 0.0746  | 0.2167  | 0.0180  | 0.0973  |
| 1 | 1.9080                    | 0.7367  | -0.8780 | 0.1263  | 0.1274  | 0.0405  | 0.1306   | 0.0968  | 0.0703  | 0.2218  | 0.0318  | 0.0877  |
| 1 | 1.9080                    | 0.7367  | 0.8780  | 0.1263  | 0.1274  | 0.0405  | 0.1306   | 0.0968  | 0.0703  | 0.2218  | 0.0318  | 0.0877  |

Dipole mement (in D) 3.72 (DEN) 3.93 1.87 2.64 3.40 3.53 3.74 4.64 6.50 3.45

-----  
File TZVPMol148.out

Molecule PMol148 1-nitropropane

SP Mol148 B3LYP/Def2TZVP VAC.

0 13

Dipole -3.7184 -1.0013 0.0000 3.8509

Quadrupole -3.8994 -0.2521 4.1516 -0.0632 -0.0001 0.0002

|   | Atomic coordinates (in A) |         |         | Mul.    | Lowdin  | Hirsch. | I-Hirsch | CM5     | ESP     | NPA     | AIM     | ACP     |
|---|---------------------------|---------|---------|---------|---------|---------|----------|---------|---------|---------|---------|---------|
| 7 | 1.2175                    | -0.0009 | -0.0000 | 0.4021  | -0.0648 | 0.2478  | 0.7582   | 0.0678  | 0.7845  | 0.5165  | 0.4883  | 0.2413  |
| 8 | 1.3378                    | 1.2107  | -0.0001 | -0.2998 | -0.0158 | -0.1953 | -0.4058  | -0.1577 | -0.4441 | -0.3589 | -0.4787 | -0.2215 |
| 8 | 2.1304                    | -0.8081 | 0.0000  | -0.3043 | -0.0289 | -0.2141 | -0.4284  | -0.1757 | -0.4548 | -0.3653 | -0.4848 | -0.2411 |
| 6 | -0.1812                   | -0.5800 | 0.0000  | -0.1589 | -0.2304 | 0.0055  | -0.2491  | -0.0458 | -0.2314 | -0.2765 | 0.2316  | -0.0254 |
| 6 | -1.2692                   | 0.4593  | -0.0000 | -0.1370 | -0.2953 | -0.0481 | -0.1600  | -0.1551 | 0.3212  | -0.4120 | 0.0664  | -0.1381 |
| 1 | -0.2087                   | -1.2304 | 0.8740  | 0.1354  | 0.1460  | 0.0539  | 0.1322   | 0.1232  | 0.0922  | 0.2216  | 0.0582  | 0.1044  |
| 1 | -0.2087                   | -1.2305 | -0.8739 | 0.1354  | 0.1460  | 0.0539  | 0.1322   | 0.1232  | 0.0922  | 0.2216  | 0.0582  | 0.1044  |
| 1 | -1.1511                   | 1.1069  | 0.8690  | 0.1091  | 0.1408  | 0.0360  | 0.1092   | 0.0959  | -0.0295 | 0.2141  | 0.0196  | 0.0793  |
| 1 | -1.1511                   | 1.1067  | -0.8691 | 0.1091  | 0.1408  | 0.0360  | 0.1092   | 0.0959  | -0.0295 | 0.2141  | 0.0196  | 0.0793  |
| 6 | -2.6402                   | -0.1924 | 0.0000  | -0.3340 | -0.3002 | -0.0779 | -0.3216  | -0.2295 | -0.3915 | -0.5875 | 0.0129  | -0.2444 |
| 1 | -2.7872                   | -0.8217 | -0.8780 | 0.1089  | 0.1194  | 0.0319  | 0.1050   | 0.0838  | 0.0970  | 0.1989  | -0.0017 | 0.0845  |
| 1 | -2.7872                   | -0.8216 | 0.8782  | 0.1089  | 0.1194  | 0.0319  | 0.1050   | 0.0838  | 0.0970  | 0.1989  | -0.0017 | 0.0845  |
| 1 | -3.4303                   | 0.5551  | -0.0000 | 0.1252  | 0.1231  | 0.0385  | 0.1140   | 0.0900  | 0.0967  | 0.2144  | 0.0121  | 0.0928  |

Dipole mement (in D) 3.85 (DEN) 4.08 2.11 2.82 3.59 3.72 3.89 4.77 6.70 3.59

-----  
File TZVPMol149.out

Molecule PMol149 2-nitropropane

SP Mol149 B3LYP/Def2TZVP VAC.

0 13

Dipole 3.7055 0.0009 -0.9455 3.8242

Quadrupole -2.1798 3.5072 -1.3275 0.0008 -0.5591 0.0044

|   | Atomic coordinates (in A) |         |         | Mul.    | Lowdin  | Hirsch. | I-Hirsch | CM5     | ESP     | NPA     | AIM     | ACP     |
|---|---------------------------|---------|---------|---------|---------|---------|----------|---------|---------|---------|---------|---------|
| 7 | -0.8496                   | -0.0003 | 0.0157  | 0.3967  | -0.0482 | 0.2465  | 0.7421   | 0.0697  | 0.6699  | 0.5121  | 0.4923  | 0.2368  |
| 8 | -1.0217                   | -0.0012 | 1.2226  | -0.3102 | -0.0227 | -0.2011 | -0.4089  | -0.1641 | -0.4169 | -0.3737 | -0.4889 | -0.2275 |
| 8 | -1.7286                   | 0.0007  | -0.8279 | -0.2997 | -0.0240 | -0.2083 | -0.4252  | -0.1696 | -0.4361 | -0.3602 | -0.4821 | -0.2346 |
| 6 | 1.2650                    | 1.2629  | 0.0224  | -0.3528 | -0.2738 | -0.0817 | -0.4133  | -0.2251 | -0.3828 | -0.6048 | 0.0145  | -0.2459 |
| 6 | 0.6007                    | 0.0003  | -0.4746 | 0.0461  | -0.2830 | 0.0364  | 0.0357   | 0.0186  | 0.3043  | -0.0982 | 0.2471  | 0.0820  |
| 1 | 0.7510                    | 2.1563  | -0.3271 | 0.1297  | 0.1273  | 0.0408  | 0.1244   | 0.0961  | 0.1019  | 0.2174  | 0.0206  | 0.0924  |
| 1 | 1.2879                    | 1.2794  | 1.1104  | 0.1358  | 0.1304  | 0.0391  | 0.1332   | 0.0967  | 0.1088  | 0.2226  | 0.0364  | 0.0844  |
| 1 | 2.2903                    | 1.3011  | -0.3412 | 0.1151  | 0.1296  | 0.0429  | 0.1316   | 0.0958  | 0.1145  | 0.2157  | 0.0181  | 0.0960  |
| 6 | 1.2657                    | -1.2625 | 0.0209  | -0.3528 | -0.2739 | -0.0817 | -0.4133  | -0.2251 | -0.3830 | -0.6048 | 0.0147  | -0.2459 |
| 1 | 0.5000                    | 0.0009  | -1.5580 | 0.1116  | 0.1511  | 0.0443  | 0.1043   | 0.1184  | -0.0057 | 0.2183  | 0.0529  | 0.0893  |
| 1 | 0.7522                    | -2.1557 | -0.3296 | 0.1296  | 0.1273  | 0.0408  | 0.1244   | 0.0961  | 0.1018  | 0.2174  | 0.0206  | 0.0924  |
| 1 | 2.2910                    | -1.2997 | -0.3428 | 0.1151  | 0.1296  | 0.0429  | 0.1316   | 0.0958  | 0.1146  | 0.2156  | 0.0181  | 0.0960  |
| 1 | 1.2887                    | -1.2802 | 1.1089  | 0.1358  | 0.1304  | 0.0391  | 0.1332   | 0.0967  | 0.1088  | 0.2226  | 0.0364  | 0.0844  |

Dipole moment (in D) 3.82 (DEN) 3.78 2.11 2.72 3.43 3.63 3.86 4.86 6.61 3.53

-----  
File TZVPMol150.out

Molecule PMol150 nitrobenzene

SP Mol150 B3LYP/Def2TZVP VAC.

0 14

Dipole 0.0000 0.0000 -4.6364 4.6364

Quadrupole -0.7995 4.0128 -3.2133 0.0000 0.0000 0.0000

|   | Atomic coordinates (in A) |         |         | Mul.    | Lowdin  | Hirsch. | I-Hirsch | CM5     | ESP     | NPA     | AIM     | ACP     |
|---|---------------------------|---------|---------|---------|---------|---------|----------|---------|---------|---------|---------|---------|
| 6 | 0.0000                    | 0.0000  | -2.5032 | -0.1058 | -0.1141 | -0.0188 | -0.0609  | -0.0747 | -0.1344 | -0.1732 | -0.0162 | -0.0642 |
| 6 | 0.0000                    | 1.2059  | -1.8126 | -0.0744 | -0.1237 | -0.0267 | -0.0862  | -0.0823 | -0.0572 | -0.2009 | -0.0091 | -0.0731 |
| 6 | 0.0000                    | 1.2140  | -0.4273 | -0.1641 | -0.0893 | -0.0248 | -0.1133  | -0.0720 | -0.2268 | -0.1818 | 0.0075  | -0.0694 |
| 6 | 0.0000                    | 0.0000  | 0.2396  | 0.0837  | -0.1554 | 0.0260  | 0.0071   | 0.0767  | 0.1882  | 0.0195  | 0.2026  | 0.1220  |
| 6 | 0.0000                    | -1.2140 | -0.4273 | -0.1641 | -0.0893 | -0.0248 | -0.1133  | -0.0720 | -0.2268 | -0.1818 | 0.0074  | -0.0694 |
| 6 | 0.0000                    | -1.2059 | -1.8126 | -0.0744 | -0.1237 | -0.0267 | -0.0862  | -0.0823 | -0.0572 | -0.2009 | -0.0093 | -0.0731 |
| 1 | 0.0000                    | -2.1310 | 0.1436  | 0.1592  | 0.1585  | 0.0520  | 0.1278   | 0.1166  | 0.1630  | 0.2458  | 0.0962  | 0.0845  |
| 1 | 0.0000                    | -2.1424 | -2.3541 | 0.1256  | 0.1483  | 0.0504  | 0.1070   | 0.1066  | 0.1217  | 0.2178  | 0.0473  | 0.0957  |
| 1 | 0.0000                    | 2.1424  | -2.3541 | 0.1256  | 0.1483  | 0.0504  | 0.1070   | 0.1066  | 0.1217  | 0.2178  | 0.0473  | 0.0957  |
| 1 | 0.0000                    | 2.1310  | 0.1436  | 0.1592  | 0.1585  | 0.0520  | 0.1278   | 0.1166  | 0.1630  | 0.2458  | 0.0962  | 0.0845  |
| 1 | 0.0000                    | 0.0000  | -3.5855 | 0.1245  | 0.1476  | 0.0502  | 0.1031   | 0.1063  | 0.1297  | 0.2152  | 0.0455  | 0.0957  |
| 7 | 0.0000                    | 0.0000  | 1.7152  | 0.4238  | -0.0242 | 0.2443  | 0.7289   | 0.0797  | 0.6098  | 0.5029  | 0.4434  | 0.2259  |
| 8 | 0.0000                    | -1.0846 | 2.2788  | -0.3094 | -0.0208 | -0.2017 | -0.4244  | -0.1628 | -0.3974 | -0.3631 | -0.4795 | -0.2273 |
| 8 | 0.0000                    | 1.0846  | 2.2788  | -0.3094 | -0.0208 | -0.2017 | -0.4244  | -0.1628 | -0.3974 | -0.3631 | -0.4795 | -0.2273 |

Dipole moment (in D) 4.64 (DEN) 4.71 2.62 3.51 4.60 4.27 4.68 5.75 8.01 4.34  
-----

File TZVPMol151.out

Molecule PMol151 methyl\_nitrate

SP Mol151 B3LYP/Def2TZVP VAC.

0 8

Dipole -0.4803 -2.9692 0.0000 3.0078

Quadrupole -3.2529 1.8010 1.4519 0.1679 0.0000 0.0000

|   | Atomic coordinates (in A) |         |         | Mul.    | Lowdin  | Hirsch. | I-Hirsch | CM5     | ESP     | NPA     | AIM     | ACP     |
|---|---------------------------|---------|---------|---------|---------|---------|----------|---------|---------|---------|---------|---------|
| 7 | 0.0000                    | 0.6282  | 0.0000  | 0.4882  | -0.1430 | 0.3082  | 0.9297   | 0.1668  | 0.8800  | 0.6877  | 0.9021  | 0.3753  |
| 8 | -1.2011                   | 0.5647  | 0.0000  | -0.2828 | 0.0005  | -0.1720 | -0.4260  | -0.1307 | -0.3977 | -0.3495 | -0.4452 | -0.2020 |
| 8 | 0.7325                    | 1.5716  | 0.0000  | -0.2540 | 0.0184  | -0.1749 | -0.4143  | -0.1246 | -0.4010 | -0.3110 | -0.4130 | -0.2141 |
| 8 | 0.7120                    | -0.6128 | 0.0000  | -0.1886 | 0.1226  | -0.1014 | -0.2773  | -0.1284 | -0.3280 | -0.3360 | -0.6488 | -0.1398 |
| 6 | -0.1524                   | -1.7437 | 0.0000  | -0.1726 | -0.3381 | -0.0044 | -0.1568  | -0.1198 | -0.0240 | -0.2755 | 0.4425  | -0.1061 |
| 1 | 0.5268                    | -2.5910 | 0.0000  | 0.1383  | 0.1207  | 0.0574  | 0.1279   | 0.1198  | 0.1122  | 0.2045  | 0.0594  | 0.1070  |
| 1 | -0.7797                   | -1.7661 | 0.8892  | 0.1357  | 0.1094  | 0.0435  | 0.1085   | 0.1085  | 0.0792  | 0.1899  | 0.0516  | 0.0898  |
| 1 | -0.7797                   | -1.7661 | -0.8892 | 0.1357  | 0.1094  | 0.0435  | 0.1085   | 0.1085  | 0.0792  | 0.1899  | 0.0516  | 0.0898  |

Dipole mement (in D) 3.01 (DEN) 3.27 1.20 1.98 2.80 2.80 3.07 3.81 5.28 2.62

-----  
File TZVPMol152.out

Molecule PMol152 acetyl\_cyanide

SP Mol152 B3LYP/Def2TZVP VAC.

0 8

Dipole 3.2664 1.3236 0.0000 3.5244

Quadrupole 2.6339 -6.1394 3.5055 0.6025 0.0000 0.0000

|   | Atomic coordinates (in A) |         |         | Mul.    | Lowdin  | Hirsch. | I-Hirsch | CM5     | ESP     | NPA     | AIM     | ACP     |
|---|---------------------------|---------|---------|---------|---------|---------|----------|---------|---------|---------|---------|---------|
| 1 | 1.7122                    | 1.7423  | 0.0000  | 0.1443  | 0.1374  | 0.0576  | 0.1675   | 0.1129  | 0.1533  | 0.2395  | 0.0609  | 0.1027  |
| 6 | 1.4772                    | 0.6831  | 0.0000  | -0.3300 | -0.2357 | -0.0713 | -0.5564  | -0.2129 | -0.4645 | -0.6839 | -0.0133 | -0.2456 |
| 6 | 0.0000                    | 0.4778  | 0.0000  | 0.2936  | -0.3534 | 0.1938  | 0.5986   | 0.2231  | 0.6294  | 0.4799  | 1.1442  | 0.3613  |
| 8 | -0.8297                   | 1.3493  | 0.0000  | -0.2204 | 0.1947  | -0.2033 | -0.4143  | -0.2493 | -0.4370 | -0.4405 | -1.0771 | -0.3288 |
| 1 | 1.9209                    | 0.2017  | 0.8722  | 0.1434  | 0.1465  | 0.0599  | 0.1620   | 0.1132  | 0.1450  | 0.2428  | 0.0561  | 0.1087  |
| 1 | 1.9209                    | 0.2017  | -0.8722 | 0.1434  | 0.1465  | 0.0599  | 0.1620   | 0.1132  | 0.1450  | 0.2428  | 0.0561  | 0.1087  |
| 6 | -0.4237                   | -0.9340 | 0.0000  | -0.2005 | -0.1395 | 0.0725  | 0.1735   | 0.1912  | 0.1825  | 0.1646  | 0.8899  | 0.2160  |
| 7 | -0.7482                   | -2.0430 | 0.0000  | 0.0262  | 0.1036  | -0.1691 | -0.2928  | -0.2915 | -0.3536 | -0.2453 | -1.1170 | -0.3230 |

Dipole mement (in D) 3.52 (DEN) 2.70 1.48 2.49 2.85 3.44 3.53 3.90 8.55 3.35

-----  
File TZVPMol153.out

Molecule PMol153 dimethylnitrosamine

SP Mol153 B3LYP/Def2TZVP VAC.

0 11

Dipole 3.8932 1.6290 0.0000 4.2203

Quadrupole -2.4474 1.3002 1.1472 -1.9003 0.0000 0.0000

|   | Atomic coordinates (in A) |         |         | Mul.    | Lowdin  | Hirsch. | I-Hirsch | CM5     | ESP     | NPA     | AIM     | ACP     |
|---|---------------------------|---------|---------|---------|---------|---------|----------|---------|---------|---------|---------|---------|
| 8 | -1.7935                   | -0.2721 | -0.0000 | -0.3396 | -0.0900 | -0.2343 | -0.3608  | -0.1899 | -0.2567 | -0.4077 | -0.5381 | -0.2337 |
| 7 | -0.7094                   | -0.8338 | -0.0000 | 0.0173  | -0.0868 | 0.0241  | 0.1584   | -0.0487 | -0.1938 | 0.1956  | 0.3039  | 0.0168  |
| 7 | 0.3397                    | -0.0042 | 0.0000  | 0.0645  | 0.0609  | 0.0169  | 0.0955   | -0.1813 | 0.4766  | -0.1972 | -0.6860 | -0.1566 |

|   |         |         |         |         |         |         |         |         |         |         |        |         |
|---|---------|---------|---------|---------|---------|---------|---------|---------|---------|---------|--------|---------|
| 6 | 0.1413  | 1.4293  | 0.0000  | -0.2714 | -0.3070 | -0.0354 | -0.3002 | -0.1169 | -0.4505 | -0.4415 | 0.3265 | -0.1205 |
| 1 | -0.4296 | 1.7342  | -0.8769 | 0.1383  | 0.1237  | 0.0432  | 0.1218  | 0.1095  | 0.1537  | 0.2185  | 0.0521 | 0.0945  |
| 1 | -0.4296 | 1.7341  | 0.8769  | 0.1383  | 0.1237  | 0.0432  | 0.1218  | 0.1095  | 0.1537  | 0.2185  | 0.0521 | 0.0945  |
| 1 | 1.1104  | 1.9176  | 0.0000  | 0.1246  | 0.1208  | 0.0447  | 0.1192  | 0.1084  | 0.1309  | 0.2041  | 0.0276 | 0.1048  |
| 6 | 1.6479  | -0.6025 | 0.0000  | -0.2693 | -0.3035 | -0.0304 | -0.2896 | -0.1109 | -0.3213 | -0.4041 | 0.3532 | -0.1090 |
| 1 | 1.5172  | -1.6811 | 0.0000  | 0.1453  | 0.1267  | 0.0479  | 0.1185  | 0.1167  | 0.0952  | 0.2273  | 0.0651 | 0.1110  |
| 1 | 2.2159  | -0.3113 | -0.8851 | 0.1260  | 0.1156  | 0.0400  | 0.1077  | 0.1019  | 0.1062  | 0.1932  | 0.0220 | 0.0991  |
| 1 | 2.2159  | -0.3113 | 0.8851  | 0.1260  | 0.1156  | 0.0400  | 0.1077  | 0.1019  | 0.1062  | 0.1932  | 0.0220 | 0.0991  |

Dipole mement (in D) 4.22 (DEN) 4.65 2.32 3.04 3.55 4.00 4.15 5.08 6.49 3.99

-----  
File TZVPMol1154.out

Molecule PMol1154 formaldoxime

SP Mol1154 B3LYP/Def2TZVP VAC.

0 6

Dipole 0.2106 0.1262 0.0009 0.2455

Quadrupole 4.4366 -2.1187 -2.3179 2.4324 -0.0001 -0.0004

|   | Atomic coordinates (in A) |         |         | Mul.    | Lowdin  | Hirsch. | I-Hirsch | CM5     | ESP     | NPA     | AIM     | ACP     |
|---|---------------------------|---------|---------|---------|---------|---------|----------|---------|---------|---------|---------|---------|
| 6 | 1.1233                    | 0.1763  | -0.0001 | -0.1549 | -0.2901 | -0.0126 | -0.1209  | -0.0171 | 0.0883  | -0.1522 | 0.6295  | -0.0046 |
| 7 | 0.0697                    | -0.5274 | -0.0001 | -0.0731 | -0.0316 | -0.0834 | -0.0201  | -0.2556 | -0.3020 | -0.1278 | -0.6029 | -0.2239 |
| 8 | -1.0779                   | 0.2651  | 0.0001  | -0.3299 | -0.0641 | -0.1754 | -0.5065  | -0.3194 | -0.3701 | -0.5460 | -0.7437 | -0.2618 |
| 1 | 2.0590                    | -0.3653 | 0.0003  | 0.1295  | 0.1186  | 0.0536  | 0.1119   | 0.1191  | 0.0753  | 0.1894  | 0.0672  | 0.1127  |
| 1 | 1.1214                    | 1.2645  | 0.0002  | 0.1084  | 0.1021  | 0.0514  | 0.1212   | 0.1171  | 0.1079  | 0.1704  | 0.0687  | 0.0989  |
| 1 | -1.7851                   | -0.3861 | 0.0003  | 0.3199  | 0.1651  | 0.1665  | 0.4145   | 0.3559  | 0.4006  | 0.4661  | 0.5809  | 0.2787  |

Dipole mement (in D) 0.25 (DEN) 0.53 0.95 0.22 0.94 0.24 0.24 1.01 3.12 0.53

-----  
File TZVPMol1155.out

Molecule PMol1155 fulminic acid

SP Mol1155 B3LYP/Def2TZVP VAC.

0 4

Dipole 0.0000 0.0000 -3.1476 3.1476

Quadrupole -0.9210 -0.9210 1.8421 0.0000 0.0000

|   | Atomic coordinates (in A) |        |         | Mul.    | Lowdin  | Hirsch. | I-Hirsch | CM5     | ESP     | NPA     | AIM     | ACP     |
|---|---------------------------|--------|---------|---------|---------|---------|----------|---------|---------|---------|---------|---------|
| 6 | 0.0000                    | 0.0000 | -1.1759 | -0.2345 | -0.1803 | -0.0173 | -0.2776  | 0.0505  | -0.4343 | -0.0780 | 0.7568  | 0.0505  |
| 7 | 0.0000                    | 0.0000 | -0.0179 | 0.3415  | 0.0907  | 0.1070  | 0.3721   | -0.0704 | 0.4743  | 0.1922  | -0.5652 | 0.0074  |
| 1 | 0.0000                    | 0.0000 | -2.2338 | 0.2148  | 0.1351  | 0.1171  | 0.2503   | 0.1785  | 0.3267  | 0.2481  | 0.2418  | 0.1728  |
| 8 | 0.0000                    | 0.0000 | 1.1768  | -0.3218 | -0.0455 | -0.2067 | -0.3448  | -0.1585 | -0.3667 | -0.3624 | -0.4335 | -0.2307 |

Dipole mement (in D) 3.15 (DEN) 2.83 0.70 2.34 3.10 3.09 3.17 4.29 9.27 3.44

-----  
File TZVPMol1156.out

Molecule PMol1156 1,4-dihydrooxazole

SP Mol1156 B3LYP/Def2TZVP VAC.

0 10

```

Dipole      -1.3863  -1.0839   0.0000   1.7597
Quadrupole  4.4014  -5.1845   0.7831  -0.8908   0.0000   0.0000
  Atomic coordinates (in A)      Mul.      Lowdin      Hirsch.      I-Hirsch      CM5      ESP      NPA      AIM      ACP
  8      0.4835  -1.1041   0.0000  -0.2790   0.2153  -0.1425  -0.3217  -0.2222  -0.3760  -0.4651  -1.0513  -0.2582
  6     -0.9180  -0.7479   0.0000  -0.0118  -0.2596   0.0317   0.0550  -0.0444   0.0540  -0.1038   0.4220  -0.0075
  6     -0.9096   0.7871  -0.0000  -0.0891  -0.2834  -0.0130  -0.0504  -0.0576   0.3896  -0.2774   0.3221  -0.0307
  6     1.1456   0.0723  -0.0000   0.0955  -0.3602   0.1062   0.3874   0.1718   0.5387   0.3610   1.2355   0.2534
  7     0.5075   1.1632  -0.0000  -0.2465   0.0594  -0.2051  -0.4778  -0.3988  -0.6694  -0.4574  -1.1121  -0.4319
  1    -1.3756  -1.1900  -0.8843   0.0978   0.1212   0.0405   0.0728   0.1037   0.0439   0.1818   0.0270   0.0869
  1    -1.3756  -1.1900   0.8843   0.0978   0.1212   0.0405   0.0728   0.1037   0.0439   0.1818   0.0270   0.0869
  1    -1.4010   1.2133  -0.8754   0.1001   0.1275   0.0378   0.0895   0.1022  -0.0251   0.1981   0.0203   0.0938
  1    -1.4010   1.2133   0.8754   0.1001   0.1275   0.0378   0.0895   0.1022  -0.0251   0.1981   0.0203   0.0938
  1     2.2239  -0.0253  -0.0000   0.1352   0.1312   0.0661   0.0830   0.1393   0.0256   0.1829   0.0892   0.1136

Dipole mement (in D)   1.76 (DEN)      1.48      1.32      0.86      1.48      1.72      1.81      1.71      1.43      1.61

```

```

-----
File TZVPMol157.out
Molecule PMol157      oxazole
SP Mol157 B3LYP/Def2TZVP VAC.
  0      8

```

```

Dipole      0.7388  -1.3667   0.0005   1.5536
Quadrupole  5.2474  -3.4031  -1.8443   0.8359  -0.0003   0.0000
  Atomic coordinates (in A)      Mul.      Lowdin      Hirsch.      I-Hirsch      CM5      ESP      NPA      AIM      ACP
  8     -0.3648  -1.0799  -0.0002  -0.2184   0.3318  -0.0839  -0.2024  -0.1558  -0.1973  -0.3891  -1.0807  -0.2116
  6     0.9266  -0.6448   0.0001   0.0081  -0.2531   0.0133   0.0223  -0.0064  -0.0962   0.0399   0.4088   0.0444
  6     0.9103   0.7042   0.0001  -0.0913  -0.2504  -0.0259  -0.0229  -0.0080   0.0836  -0.1195   0.3745   0.0238
  6    -1.0931   0.0571   0.0002   0.1200  -0.3245   0.0933   0.3009   0.1541   0.3848   0.3030   1.1076   0.2281
  7    -0.4014   1.1444  -0.0001  -0.2418   0.1014  -0.1878  -0.4262  -0.3750  -0.5042  -0.4466  -1.0907  -0.4173
  1     1.6888  -1.4018   0.0001   0.1457   0.1311   0.0644   0.1154   0.1283   0.1550   0.2084   0.0986   0.1069
  1     1.7400   1.3900   0.0001   0.1296   0.1341   0.0565   0.1186   0.1208   0.1111   0.2142   0.0753   0.1076
  1    -2.1639  -0.0579   0.0002   0.1481   0.1297   0.0701   0.0942   0.1421   0.0632   0.1898   0.1062   0.1182

Dipole mement (in D)   1.55 (DEN)      0.88      1.42      0.81      1.47      1.49      1.58      1.44      1.98      1.47

```

```

-----
File TZVPMol158.out
Molecule PMol158      isoxazole
SP Mol158 B3LYP/Def2TZVP VAC.
  0      8

```

```

Dipole      0.9613   2.8455   0.0004   3.0035
Quadrupole  3.6823  -1.5578  -2.1245  -1.7292   0.0001  -0.0005
  Atomic coordinates (in A)      Mul.      Lowdin      Hirsch.      I-Hirsch      CM5      ESP      NPA      AIM      ACP
  8     0.5653  -0.9927  -0.0002  -0.1187   0.2685  -0.0540  -0.0604  -0.0689  -0.0507  -0.2560  -0.7391  -0.1063
  6     1.0956   0.2336   0.0002   0.0388  -0.2489   0.0428   0.1017   0.0253   0.1581   0.1305   0.4901   0.0849
  6     0.1213   1.1735  -0.0001  -0.1793  -0.2039  -0.0789  -0.2989  -0.1233  -0.4233  -0.3670  -0.0291  -0.1166
  6    -1.0621   0.4037   0.0001  -0.0466  -0.2584   0.0022   0.0438   0.0346   0.2822  -0.0405   0.5206   0.0646
  7    -0.8237  -0.8832  -0.0000  -0.1097   0.0250  -0.1057  -0.1728  -0.2489  -0.3679  -0.1281  -0.5034  -0.2623

```



|   |         |        |         |        |        |        |        |        |        |        |        |        |
|---|---------|--------|---------|--------|--------|--------|--------|--------|--------|--------|--------|--------|
| 1 | -2.0880 | 0.7377 | 0.0002  | 0.1349 | 0.1397 | 0.0648 | 0.1232 | 0.1313 | 0.0911 | 0.2178 | 0.0833 | 0.1183 |
| 1 | 0.2299  | 2.2428 | -0.0001 | 0.1314 | 0.1422 | 0.0581 | 0.1466 | 0.1148 | 0.1982 | 0.2347 | 0.0762 | 0.1040 |
| 1 | 2.1719  | 0.2787 | 0.0002  | 0.1492 | 0.1358 | 0.0707 | 0.1169 | 0.1352 | 0.1124 | 0.2085 | 0.1015 | 0.1134 |

Dipole moment (in D) 3.00 (DEN) 2.22 1.31 1.40 1.89 2.82 2.91 3.42 8.31 3.01

-----  
File TZVPMol159.out

Molecule PMol159 morpholine

SP Mol159 B3LYP/Def2TZVP VAC.

0 15

Dipole 0.2142 1.5390 0.0000 1.5538

Quadrupole -3.7070 0.1654 3.5417 -1.8026 0.0000 0.0000

|   | Atomic coordinates (in A) |         |         | Mul.    | Lowdin  | Hirsch. | I-Hirsch | CM5     | ESP     | NPA     | AIM     | ACP     |
|---|---------------------------|---------|---------|---------|---------|---------|----------|---------|---------|---------|---------|---------|
| 8 | -0.6456                   | -1.2596 | 0.0000  | -0.3242 | 0.1559  | -0.1745 | -0.3344  | -0.2729 | -0.3266 | -0.4951 | -1.0474 | -0.2877 |
| 6 | -0.0054                   | -0.7738 | 1.1654  | -0.0085 | -0.3222 | 0.0193  | 0.0713   | -0.0568 | 0.0201  | -0.0768 | 0.5046  | -0.0022 |
| 1 | 1.0299                    | -1.1416 | 1.2027  | 0.0671  | 0.1181  | 0.0244  | 0.0507   | 0.0898  | 0.0693  | 0.1552  | 0.0014  | 0.0701  |
| 1 | -0.5495                   | -1.1889 | 2.0131  | 0.0967  | 0.1257  | 0.0382  | 0.0679   | 0.1024  | 0.0614  | 0.1858  | 0.0168  | 0.0833  |
| 6 | -0.0054                   | -0.7738 | -1.1654 | -0.0085 | -0.3222 | 0.0193  | 0.0713   | -0.0568 | 0.0201  | -0.0768 | 0.5045  | -0.0022 |
| 1 | 1.0299                    | -1.1416 | -1.2027 | 0.0671  | 0.1181  | 0.0244  | 0.0507   | 0.0898  | 0.0693  | 0.1552  | 0.0014  | 0.0701  |
| 1 | -0.5495                   | -1.1889 | -2.0131 | 0.0967  | 0.1257  | 0.0382  | 0.0679   | 0.1024  | 0.0614  | 0.1858  | 0.0168  | 0.0833  |
| 6 | -0.0054                   | 0.7382  | 1.1975  | -0.0751 | -0.3151 | -0.0187 | -0.0192  | -0.0676 | 0.1108  | -0.2437 | 0.3419  | -0.0332 |
| 1 | -1.0476                   | 1.0895  | 1.2727  | 0.0665  | 0.1150  | 0.0169  | 0.0504   | 0.0814  | 0.0317  | 0.1565  | -0.0189 | 0.0649  |
| 1 | 0.5277                    | 1.0927  | 2.0809  | 0.0921  | 0.1291  | 0.0352  | 0.0818   | 0.0997  | 0.0388  | 0.1973  | 0.0052  | 0.0925  |
| 6 | -0.0054                   | 0.7382  | -1.1975 | -0.0751 | -0.3151 | -0.0187 | -0.0192  | -0.0676 | 0.1108  | -0.2437 | 0.3419  | -0.0332 |
| 1 | 0.5277                    | 1.0927  | -2.0809 | 0.0921  | 0.1291  | 0.0352  | 0.0818   | 0.0997  | 0.0388  | 0.1973  | 0.0052  | 0.0925  |
| 1 | -1.0476                   | 1.0895  | -1.2727 | 0.0665  | 0.1150  | 0.0169  | 0.0504   | 0.0814  | 0.0317  | 0.1565  | -0.0189 | 0.0649  |
| 7 | 0.6672                    | 1.2238  | 0.0000  | -0.3340 | -0.0166 | -0.1541 | -0.5480  | -0.5162 | -0.6752 | -0.6074 | -0.9886 | -0.4902 |
| 1 | 0.7029                    | 2.2331  | 0.0000  | 0.1807  | 0.1597  | 0.0982  | 0.2766   | 0.2915  | 0.3376  | 0.3540  | 0.3339  | 0.2273  |

Dipole moment (in D) 1.55 (DEN) 1.38 0.66 0.88 1.19 1.45 1.56 2.10 2.76 1.02

-----  
File TZVPMol160.out

Molecule PMol160 uracil

SP Mol160 B3LYP/Def2TZVP VAC.

0 12

Dipole 1.3441 4.2472 -0.0005 4.4548

Quadrupole -10.3887 9.0846 1.3041 2.3878 0.0006 0.0006

|   | Atomic coordinates (in A) |         |         | Mul.    | Lowdin  | Hirsch. | I-Hirsch | CM5     | ESP     | NPA     | AIM     | ACP     |
|---|---------------------------|---------|---------|---------|---------|---------|----------|---------|---------|---------|---------|---------|
| 7 | -0.0330                   | -0.9797 | -0.0000 | -0.2324 | 0.2000  | -0.0682 | -0.7852  | -0.4000 | -0.5951 | -0.6124 | -1.1335 | -0.4068 |
| 6 | 1.2203                    | -0.4067 | -0.0000 | 0.2963  | -0.5090 | 0.1993  | 0.9592   | 0.3607  | 0.7637  | 0.7488  | 1.8494  | 0.5304  |
| 7 | 1.1689                    | 0.9828  | -0.0001 | -0.2345 | 0.1803  | -0.0578 | -0.6302  | -0.4056 | -0.4791 | -0.5725 | -1.1683 | -0.3908 |
| 6 | 0.0051                    | 1.6989  | -0.0000 | 0.0396  | -0.1720 | 0.0392  | 0.2240   | 0.0554  | 0.1089  | 0.0611  | 0.4050  | 0.0897  |
| 6 | -1.1987                   | 1.1010  | -0.0000 | -0.2306 | -0.1540 | -0.0782 | -0.4311  | -0.1181 | -0.5100 | -0.3738 | -0.0114 | -0.1193 |
| 6 | -1.2913                   | -0.3439 | -0.0002 | 0.2472  | -0.4251 | 0.1586  | 0.7879   | 0.2523  | 0.7910  | 0.6068  | 1.3859  | 0.4024  |
| 8 | -2.3076                   | -1.0036 | 0.0002  | -0.3192 | 0.0931  | -0.2982 | -0.5519  | -0.3396 | -0.5660 | -0.5631 | -1.1691 | -0.4101 |
| 8 | 2.2585                    | -1.0236 | 0.0001  | -0.3266 | 0.0766  | -0.3143 | -0.6111  | -0.3522 | -0.5740 | -0.5905 | -1.1931 | -0.4214 |

|   |         |         |         |        |        |        |        |        |        |        |        |        |
|---|---------|---------|---------|--------|--------|--------|--------|--------|--------|--------|--------|--------|
| 1 | -0.0464 | -1.9889 | 0.0001  | 0.2355 | 0.2046 | 0.1460 | 0.3901 | 0.3477 | 0.3497 | 0.4232 | 0.4396 | 0.2465 |
| 1 | 2.0629  | 1.4427  | -0.0000 | 0.2365 | 0.2013 | 0.1501 | 0.3713 | 0.3496 | 0.3490 | 0.4185 | 0.4363 | 0.2639 |
| 1 | -2.1115 | 1.6727  | 0.0001  | 0.1377 | 0.1557 | 0.0570 | 0.1584 | 0.1168 | 0.2073 | 0.2391 | 0.0798 | 0.0941 |
| 1 | 0.1238  | 2.7738  | 0.0000  | 0.1504 | 0.1485 | 0.0667 | 0.1187 | 0.1329 | 0.1547 | 0.2148 | 0.0788 | 0.1214 |

Dipole mement (in D) 4.45 (DEN) 3.95 2.16 3.47 4.66 4.05 4.49 5.64 9.20 4.44

File TZVPMol205.out  
Molecule PMol205 difluoroborane  
SP Mol205 B3LYP/Def2TZVP VAC.

0 4

|                           |        |         |         |         |         |          |         |         |         |         |         |        |
|---------------------------|--------|---------|---------|---------|---------|----------|---------|---------|---------|---------|---------|--------|
| Dipole                    | 0.0000 | 0.0000  | 0.8727  | 0.8727  |         |          |         |         |         |         |         |        |
| Quadrupole                | 1.7858 | -2.0906 | 0.3048  | 0.0000  | 0.0000  | 0.0000   | 0.0000  |         |         |         |         |        |
| Atomic coordinates (in A) |        |         |         |         |         |          |         |         |         |         |         |        |
|                           |        |         | Mul.    | Lowdin  | Hirsch. | I-Hirsch | CM5     | ESP     | NPA     | AIM     | ACP     |        |
| 5                         | 0.0000 | 0.0000  | 0.4543  | 0.4630  | -0.7264 | 0.3149   | 0.9351  | 0.1004  | 0.7764  | 1.1097  | 2.2754  | 0.554  |
| 1                         | 0.0000 | 0.0000  | 1.6336  | -0.0187 | 0.0330  | -0.0397  | -0.2217 | 0.0701  | -0.1793 | -0.1578 | -0.6123 | -0.052 |
| 9                         | 0.0000 | 1.1234  | -0.2169 | -0.2221 | 0.3467  | -0.1376  | -0.3567 | -0.0853 | -0.2985 | -0.4759 | -0.8320 | -0.251 |
| 9                         | 0.0000 | -1.1234 | -0.2169 | -0.2221 | 0.3467  | -0.1376  | -0.3567 | -0.0853 | -0.2985 | -0.4759 | -0.8320 | -0.251 |

Dipole mement (in D) 0.87 (DEN) 1.33 2.05 0.66 1.04 0.95 0.91 2.18 1.89 1.32

File TZVPMol206.out  
Molecule PMol206 chloroborane  
SP Mol206 B3LYP/Def2TZVP VAC.

0 4

|                           |        |         |         |         |         |          |         |         |         |         |         |        |
|---------------------------|--------|---------|---------|---------|---------|----------|---------|---------|---------|---------|---------|--------|
| Dipole                    | 0.0000 | 0.0000  | -0.4995 | 0.4995  |         |          |         |         |         |         |         |        |
| Quadrupole                | 0.7604 | -0.9228 | 0.1623  | 0.0000  | 0.0000  | 0.0000   | 0.0000  |         |         |         |         |        |
| Atomic coordinates (in A) |        |         |         |         |         |          |         |         |         |         |         |        |
|                           |        |         | Mul.    | Lowdin  | Hirsch. | I-Hirsch | CM5     | ESP     | NPA     | AIM     | ACP     |        |
| 1                         | 0.0000 | 1.0365  | -1.7412 | 0.0119  | 0.0318  | -0.0506  | -0.1568 | 0.0553  | -0.1199 | -0.0757 | -0.6198 | -0.063 |
| 1                         | 0.0000 | -1.0365 | -1.7412 | 0.0119  | 0.0318  | -0.0506  | -0.1568 | 0.0553  | -0.1199 | -0.0757 | -0.6198 | -0.063 |
| 5                         | 0.0000 | 0.0000  | -1.1771 | 0.0937  | -0.6466 | 0.1577   | 0.4542  | -0.1263 | 0.3879  | 0.2911  | 1.9351  | 0.263  |
| 17                        | 0.0000 | 0.0000  | 0.5511  | -0.1175 | 0.5831  | -0.0564  | -0.1407 | 0.0156  | -0.1481 | -0.1397 | -0.6951 | -0.138 |

Dipole mement (in D) 0.50 (DEN) 1.04 4.67 0.19 0.32 0.17 0.58 0.75 2.41 0.80

File TZVPMol207.out  
Molecule PMol207 hydroxyborane  
SP Mol207 B3LYP/Def2TZVP VAC.

0 5

|                           |         |         |        |         |         |          |         |         |         |         |         |        |
|---------------------------|---------|---------|--------|---------|---------|----------|---------|---------|---------|---------|---------|--------|
| Dipole                    | -1.5295 | -0.5079 | 0.0000 | 1.6116  |         |          |         |         |         |         |         |        |
| Quadrupole                | 0.2474  | -0.5817 | 0.3343 | 2.0487  | 0.0000  | 0.0000   |         |         |         |         |         |        |
| Atomic coordinates (in A) |         |         |        |         |         |          |         |         |         |         |         |        |
|                           |         |         | Mul.   | Lowdin  | Hirsch. | I-Hirsch | CM5     | ESP     | NPA     | AIM     | ACP     |        |
| 5                         | 0.0525  | 0.7091  | 0.0000 | 0.0960  | -0.4542 | 0.1694   | 0.6491  | -0.0804 | 0.5628  | 0.5994  | 2.0559  | 0.315  |
| 8                         | 0.0525  | -0.6361 | 0.0000 | -0.3675 | 0.1877  | -0.2168  | -0.7301 | -0.3688 | -0.6051 | -0.8414 | -1.3535 | -0.457 |
| 1                         | -0.8257 | -1.0213 | 0.0000 | 0.3234  | 0.2064  | 0.1796   | 0.4598  | 0.3629  | 0.4050  | 0.4844  | 0.5853  | 0.296  |

|   |         |        |        |         |        |         |         |        |         |         |         |        |
|---|---------|--------|--------|---------|--------|---------|---------|--------|---------|---------|---------|--------|
| 1 | -0.9689 | 1.3229 | 0.0000 | -0.0315 | 0.0252 | -0.0695 | -0.2006 | 0.0386 | -0.2049 | -0.1278 | -0.6506 | -0.080 |
| 1 | 1.1121  | 1.2417 | 0.0000 | -0.0204 | 0.0349 | -0.0627 | -0.1782 | 0.0478 | -0.1577 | -0.1146 | -0.6368 | -0.074 |

Dipole mement (in D) 1.61 (DEN) 1.39 2.88 0.87 1.87 1.53 1.58 2.13 2.54 1.24

-----  
File TZVPMol208.out

Molecule PMol208 difluorohydroxyborane

SP Mol208 B3LYP/Def2TZVP VAC.

0 5

Dipole 0.4327 -1.9509 0.0000 1.9983

Quadrupole -2.8347 1.6847 1.1500 -2.3962 0.0000 0.0000

|   | Atomic coordinates (in A) |         |        | Mul.    | Lowdin  | Hirsch. | I-Hirsch | CM5     | ESP     | NPA     | AIM     | ACP    |
|---|---------------------------|---------|--------|---------|---------|---------|----------|---------|---------|---------|---------|--------|
| 5 | 0.0000                    | 0.0218  | 0.0000 | 0.5425  | -1.1167 | 0.3546  | 1.3017   | 0.1984  | 0.9119  | 1.3565  | 2.4387  | 0.725  |
| 8 | 1.1992                    | -0.5845 | 0.0000 | -0.3878 | 0.2169  | -0.2354 | -0.9344  | -0.3739 | -0.6703 | -0.8888 | -1.3758 | -0.489 |
| 1 | 1.1444                    | -1.5406 | 0.0000 | 0.3325  | 0.2180  | 0.1868  | 0.4915   | 0.3726  | 0.4144  | 0.4955  | 0.6045  | 0.301  |
| 9 | -1.1376                   | -0.6548 | 0.0000 | -0.2516 | 0.3290  | -0.1586 | -0.4419  | -0.1055 | -0.3549 | -0.4882 | -0.8398 | -0.272 |
| 9 | -0.0555                   | 1.3335  | 0.0000 | -0.2357 | 0.3528  | -0.1475 | -0.4170  | -0.0916 | -0.3011 | -0.4750 | -0.8283 | -0.265 |

Dipole mement (in D) 2.00 (DEN) 2.28 1.25 1.27 2.16 2.00 1.95 2.57 3.03 1.67

-----  
File TZVPMol209.out

Molecule PMol209 dihydroxyborane

SP Mol209 B3LYP/Def2TZVP VAC.

0 6

Dipole 1.5391 -0.3146 0.0000 1.5709

Quadrupole 0.7205 0.1323 -0.8528 3.8143 0.0000 0.0000

|   | Atomic coordinates (in A) |         |        | Mul.    | Lowdin  | Hirsch. | I-Hirsch | CM5     | ESP     | NPA     | AIM     | ACP    |
|---|---------------------------|---------|--------|---------|---------|---------|----------|---------|---------|---------|---------|--------|
| 5 | 0.0000                    | 0.4823  | 0.0000 | 0.2286  | -0.7979 | 0.2060  | 0.9468   | 0.0113  | 0.6555  | 0.9101  | 2.2144  | 0.475  |
| 1 | 0.0531                    | 1.6685  | 0.0000 | -0.0419 | 0.0382  | -0.0614 | -0.2224  | 0.0553  | -0.1591 | -0.1341 | -0.6355 | -0.076 |
| 8 | 1.1155                    | -0.2988 | 0.0000 | -0.4179 | 0.1641  | -0.2504 | -0.8446  | -0.4002 | -0.6731 | -0.8828 | -1.3858 | -0.490 |
| 1 | 1.9309                    | 0.2011  | 0.0000 | 0.3263  | 0.2056  | 0.1755  | 0.4672   | 0.3601  | 0.4005  | 0.4886  | 0.5906  | 0.292  |
| 8 | -1.2181                   | -0.1035 | 0.0000 | -0.4114 | 0.1839  | -0.2426 | -0.8166  | -0.3869 | -0.6624 | -0.8655 | -1.3667 | -0.483 |
| 1 | -1.1632                   | -1.0626 | 0.0000 | 0.3162  | 0.2061  | 0.1729  | 0.4697   | 0.3604  | 0.4386  | 0.4836  | 0.5830  | 0.282  |

Dipole mement (in D) 1.57 (DEN) 1.45 2.78 0.77 1.91 1.48 1.52 2.25 2.65 1.34

-----  
File TZVPMol210.out

Molecule PMol210 dihydroxyfluoroborane

SP Mol210 B3LYP/Def2TZVP VAC.

0 6

Dipole 0.0000 0.0000 1.4012 1.4012

Quadrupole -0.2899 6.3106 -6.0207 0.0000 0.0000

|   | Atomic coordinates (in A) |        |         | Mul.    | Lowdin  | Hirsch. | I-Hirsch | CM5     | ESP     | NPA     | AIM     | ACP    |
|---|---------------------------|--------|---------|---------|---------|---------|----------|---------|---------|---------|---------|--------|
| 5 | 0.0000                    | 0.0000 | -0.0262 | 0.4548  | -1.1263 | 0.3066  | 1.2953   | 0.1607  | 0.8461  | 1.2799  | 2.4065  | 0.688  |
| 9 | 0.0000                    | 0.0000 | 1.3143  | -0.2816 | 0.2928  | -0.1775 | -0.4461  | -0.1273 | -0.3726 | -0.4990 | -0.8537 | -0.268 |

|   |        |         |         |         |        |         |         |         |         |         |         |        |
|---|--------|---------|---------|---------|--------|---------|---------|---------|---------|---------|---------|--------|
| 8 | 0.0000 | 1.1632  | -0.7133 | -0.4105 | 0.2047 | -0.2432 | -0.9001 | -0.3821 | -0.6309 | -0.8803 | -1.3726 | -0.493 |
| 1 | 0.0000 | 1.9318  | -0.1431 | 0.3238  | 0.2121 | 0.1786  | 0.4754  | 0.3654  | 0.3942  | 0.4898  | 0.5961  | 0.292  |
| 8 | 0.0000 | -1.1632 | -0.7133 | -0.4105 | 0.2047 | -0.2432 | -0.9001 | -0.3821 | -0.6309 | -0.8803 | -1.3725 | -0.493 |
| 1 | 0.0000 | -1.9318 | -0.1431 | 0.3238  | 0.2121 | 0.1786  | 0.4754  | 0.3654  | 0.3942  | 0.4898  | 0.5961  | 0.292  |

Dipole mement (in D) 1.40 (DEN) 0.53 0.30 0.26 2.53 1.29 1.32 2.05 2.89 1.09

-----  
File TZVPMol211.out

Molecule PMol211 boranamine

SP Mol211 B3LYP/Def2TZVP VAC.

0 6

Dipole 0.0000 0.0000 1.9733 1.9733

Quadrupole -1.0726 0.5432 0.5294 0.0000 0.0000

|   | Atomic coordinates (in A) |         |         | Mul.    | Lowdin  | Hirsch. | I-Hirsch | CM5     | ESP     | NPA     | AIM     | ACP    |
|---|---------------------------|---------|---------|---------|---------|---------|----------|---------|---------|---------|---------|--------|
| 5 | 0.0000                    | 0.0000  | -0.7758 | 0.0092  | -0.4664 | 0.0888  | 0.5628   | -0.1285 | 0.4236  | 0.4040  | 1.9931  | 0.299  |
| 7 | 0.0000                    | 0.0000  | 0.6079  | -0.4136 | 0.0384  | -0.1861 | -0.9552  | -0.5828 | -0.8364 | -0.9942 | -1.4688 | -0.668 |
| 1 | 0.0000                    | 0.8366  | 1.1644  | 0.2291  | 0.1755  | 0.1203  | 0.3669   | 0.3166  | 0.3570  | 0.3829  | 0.3819  | 0.259  |
| 1 | 0.0000                    | 1.0379  | -1.3524 | -0.0268 | 0.0385  | -0.0716 | -0.1707  | 0.0391  | -0.1506 | -0.0878 | -0.6439 | -0.075 |
| 1 | 0.0000                    | -1.0379 | -1.3524 | -0.0268 | 0.0385  | -0.0716 | -0.1707  | 0.0391  | -0.1506 | -0.0878 | -0.6439 | -0.075 |
| 1 | 0.0000                    | -0.8366 | 1.1644  | 0.2291  | 0.1755  | 0.1203  | 0.3669   | 0.3166  | 0.3570  | 0.3829  | 0.3819  | 0.259  |

Dipole mement (in D) 1.97 (DEN) 1.67 3.31 1.40 1.44 1.81 1.93 1.02 0.92 0.81

-----  
File TZVPMol212.out

Molecule PMol212 difluoroboranamine

SP Mol212 B3LYP/Def2TZVP VAC.

0 6

Dipole 0.0000 0.0000 2.6976 2.6976

Quadrupole -0.8012 -1.6348 2.4360 0.0000 0.0000 0.0000

|   | Atomic coordinates (in A) |         |         | Mul.    | Lowdin  | Hirsch. | I-Hirsch | CM5     | ESP     | NPA     | AIM     | ACP    |
|---|---------------------------|---------|---------|---------|---------|---------|----------|---------|---------|---------|---------|--------|
| 5 | 0.0000                    | 0.0000  | -0.0394 | 0.5256  | -1.0697 | 0.2965  | 1.2244   | 0.1754  | 0.9972  | 1.2701  | 2.3940  | 0.716  |
| 7 | 0.0000                    | 0.0000  | 1.3520  | -0.4613 | 0.0524  | -0.2188 | -1.1849  | -0.6061 | -1.1757 | -1.0976 | -1.5194 | -0.704 |
| 1 | 0.0000                    | 0.8425  | 1.8942  | 0.2353  | 0.1847  | 0.1263  | 0.3948   | 0.3251  | 0.4434  | 0.3961  | 0.4027  | 0.264  |
| 9 | 0.0000                    | 1.1337  | -0.7253 | -0.2674 | 0.3239  | -0.1651 | -0.4146  | -0.1098 | -0.3542 | -0.4824 | -0.8404 | -0.270 |
| 9 | 0.0000                    | -1.1337 | -0.7253 | -0.2674 | 0.3239  | -0.1651 | -0.4146  | -0.1098 | -0.3542 | -0.4824 | -0.8404 | -0.270 |
| 1 | 0.0000                    | -0.8425 | 1.8942  | 0.2353  | 0.1847  | 0.1263  | 0.3948   | 0.3251  | 0.4434  | 0.3961  | 0.4027  | 0.264  |

Dipole mement (in D) 2.70 (DEN) 3.05 1.65 1.97 2.15 2.71 2.71 3.20 2.86 1.98

-----  
File TZVPMol213.out

Molecule PMol213 difluoro(methyl)borane

SP Mol213 B3LYP/Def2TZVP VAC.

0 7

Dipole 0.0449 -1.6635 0.0000 1.6641

Quadrupole 2.0326 -0.0475 -1.9850 -0.1210 0.0000 0.0000

|   | Atomic coordinates (in A) |         |         | Mul.    | Lowdin  | Hirsch. | I-Hirsch | CM5     | ESP     | NPA     | AIM     | ACP    |
|---|---------------------------|---------|---------|---------|---------|---------|----------|---------|---------|---------|---------|--------|
| 5 | -0.0109                   | 0.0781  | 0.0000  | 0.4891  | -0.8958 | 0.3184  | 1.1007   | 0.1201  | 0.8797  | 1.2623  | 2.2895  | 0.616  |
| 9 | -0.0016                   | 0.7791  | 1.1182  | -0.2434 | 0.3442  | -0.1510 | -0.3845  | -0.0994 | -0.3392 | -0.4771 | -0.8368 | -0.265 |
| 9 | -0.0016                   | 0.7791  | -1.1182 | -0.2434 | 0.3442  | -0.1510 | -0.3845  | -0.0994 | -0.3392 | -0.4771 | -0.8368 | -0.265 |
| 6 | -0.0016                   | -1.4690 | 0.0000  | -0.3988 | -0.2510 | -0.1544 | -0.8353  | -0.2311 | -0.6775 | -1.0353 | -0.7094 | -0.398 |
| 1 | 1.0324                    | -1.8212 | 0.0000  | 0.1339  | 0.1602  | 0.0503  | 0.1710   | 0.1075  | 0.1611  | 0.2495  | 0.0348  | 0.109  |
| 1 | -0.4696                   | -1.8894 | 0.8869  | 0.1313  | 0.1491  | 0.0439  | 0.1663   | 0.1011  | 0.1576  | 0.2388  | 0.0295  | 0.102  |
| 1 | -0.4696                   | -1.8894 | -0.8869 | 0.1313  | 0.1491  | 0.0439  | 0.1663   | 0.1011  | 0.1576  | 0.2388  | 0.0295  | 0.102  |

Dipole mement (in D) 1.66 (DEN) 2.38 0.19 1.16 1.09 1.84 1.70 2.31 1.24 1.75

-----  
File TZVPMol214.out

Molecule PMol214 ethynyldifluoroborane

SP Mol214 B3LYP/Def2TZVP VAC.

0 6

Dipole 0.0000 -1.9538 0.0000 1.9538

Quadrupole -4.1733 4.4595 -0.2862 0.0000 0.0000 0.0000

|   | Atomic coordinates (in A) |         |        | Mul.    | Lowdin  | Hirsch. | I-Hirsch | CM5     | ESP     | NPA     | AIM     | ACP    |
|---|---------------------------|---------|--------|---------|---------|---------|----------|---------|---------|---------|---------|--------|
| 5 | 0.0000                    | 0.4711  | 0.0000 | 0.4920  | -0.8595 | 0.3273  | 1.0852   | 0.1434  | 0.9267  | 1.2199  | 2.3583  | 0.616  |
| 6 | -0.0000                   | -1.0438 | 0.0000 | -0.0927 | -0.0004 | -0.1145 | -0.4784  | -0.0445 | -0.3575 | -0.4268 | -0.6527 | -0.169 |
| 6 | -0.0000                   | -2.2478 | 0.0000 | -0.1583 | -0.0102 | -0.0407 | -0.0504  | -0.0880 | -0.1863 | -0.1115 | -0.2343 | -0.089 |
| 1 | 0.0000                    | -3.3115 | 0.0000 | 0.2045  | 0.1323  | 0.1007  | 0.1994   | 0.1544  | 0.2695  | 0.2319  | 0.1814  | 0.150  |
| 9 | -1.1236                   | 1.1503  | 0.0000 | -0.2227 | 0.3689  | -0.1364 | -0.3779  | -0.0827 | -0.3262 | -0.4567 | -0.8266 | -0.254 |
| 9 | 1.1236                    | 1.1503  | 0.0000 | -0.2227 | 0.3689  | -0.1364 | -0.3779  | -0.0827 | -0.3262 | -0.4567 | -0.8266 | -0.254 |

Dipole mement (in D) 1.95 (DEN) 2.43 0.14 1.35 1.95 1.87 1.99 2.63 0.88 2.00

-----  
File TZVPMol215.out

Molecule PMol215 difluoro(vinyl)borane

SP Mol215 B3LYP/Def2TZVP VAC.

0 8

Dipole -0.5739 -1.9622 0.0000 2.0444

Quadrupole -0.6501 0.7096 -0.0596 0.3524 0.0000 0.0000

|   | Atomic coordinates (in A) |         |        | Mul.    | Lowdin  | Hirsch. | I-Hirsch | CM5     | ESP     | NPA     | AIM     | ACP    |
|---|---------------------------|---------|--------|---------|---------|---------|----------|---------|---------|---------|---------|--------|
| 5 | 0.0000                    | 0.5166  | 0.0000 | 0.5227  | -0.8688 | 0.2985  | 1.0407   | 0.1086  | 0.8149  | 1.2252  | 2.2984  | 0.590  |
| 6 | -0.7104                   | -0.8468 | 0.0000 | -0.2292 | -0.1282 | -0.1107 | -0.5690  | -0.0978 | -0.4236 | -0.6140 | -0.7070 | -0.223 |
| 6 | -0.0405                   | -1.9986 | 0.0000 | -0.1723 | -0.1124 | -0.0290 | -0.0846  | -0.1236 | -0.1979 | -0.2624 | -0.0575 | -0.126 |
| 1 | 1.0439                    | -2.0206 | 0.0000 | 0.1343  | 0.1325  | 0.0465  | 0.1119   | 0.1019  | 0.1279  | 0.1942  | 0.0538  | 0.096  |
| 1 | -0.5329                   | -2.9641 | 0.0000 | 0.1256  | 0.1229  | 0.0479  | 0.1159   | 0.1004  | 0.1545  | 0.1894  | 0.0445  | 0.098  |
| 1 | -1.7957                   | -0.8739 | 0.0000 | 0.1099  | 0.1578  | 0.0432  | 0.1463   | 0.1034  | 0.1650  | 0.2163  | 0.0368  | 0.094  |
| 9 | -0.6737                   | 1.6503  | 0.0000 | -0.2377 | 0.3490  | -0.1491 | -0.3807  | -0.0968 | -0.3303 | -0.4719 | -0.8343 | -0.264 |
| 9 | 1.3170                    | 0.6106  | 0.0000 | -0.2534 | 0.3473  | -0.1474 | -0.3806  | -0.0961 | -0.3103 | -0.4768 | -0.8360 | -0.263 |

Dipole mement (in D) 2.04 (DEN) 2.38 0.70 1.50 1.79 2.13 2.10 2.67 1.29 2.08

-----

File TZVPMol216.out

Molecule PMol216 difluoro(ethyl)borane

SP Mol216 B3LYP/Def2TZVP VAC.

0 10

|                      |                           |         |         |         |         |         |          |         |         |         |         |        |
|----------------------|---------------------------|---------|---------|---------|---------|---------|----------|---------|---------|---------|---------|--------|
| Dipole               | -1.4714                   | -0.7819 | -0.0003 | 1.6662  |         |         |          |         |         |         |         |        |
| Quadrupole           | -1.7320                   | -0.9304 | 2.6624  | 0.6869  | 0.0000  | -0.0005 |          |         |         |         |         |        |
|                      | Atomic coordinates (in A) |         |         | Mul.    | Lowdin  | Hirsch. | I-Hirsch | CM5     | ESP     | NPA     | AIM     | ACP    |
| 5                    | 0.6049                    | -0.0131 | -0.0001 | 0.4895  | -0.8702 | 0.3146  | 1.0736   | 0.1157  | 0.7499  | 1.2672  | 2.2760  | 0.612  |
| 6                    | -0.7555                   | -0.7593 | -0.0001 | -0.2711 | -0.2346 | -0.1153 | -0.6549  | -0.1533 | -0.1831 | -0.8140 | -0.6637 | -0.289 |
| 6                    | -1.9977                   | 0.1185  | 0.0002  | -0.3062 | -0.2880 | -0.0808 | -0.2687  | -0.2260 | -0.0379 | -0.5783 | 0.0234  | -0.241 |
| 1                    | -2.9129                   | -0.4709 | 0.0001  | 0.1120  | 0.1162  | 0.0304  | 0.1092   | 0.0820  | 0.0321  | 0.2008  | -0.0018 | 0.084  |
| 1                    | -2.0288                   | 0.7683  | -0.8734 | 0.1118  | 0.1227  | 0.0313  | 0.1072   | 0.0845  | 0.0071  | 0.2032  | 0.0019  | 0.084  |
| 1                    | -2.0287                   | 0.7679  | 0.8741  | 0.1118  | 0.1227  | 0.0313  | 0.1072   | 0.0845  | 0.0071  | 0.2032  | 0.0019  | 0.084  |
| 1                    | -0.7583                   | -1.4390 | -0.8584 | 0.1179  | 0.1692  | 0.0431  | 0.1448   | 0.1039  | 0.0364  | 0.2361  | 0.0176  | 0.098  |
| 1                    | -0.7582                   | -1.4394 | 0.8577  | 0.1180  | 0.1692  | 0.0431  | 0.1448   | 0.1039  | 0.0364  | 0.2361  | 0.0176  | 0.098  |
| 9                    | 1.7513                    | -0.6682 | -0.0001 | -0.2392 | 0.3441  | -0.1518 | -0.3874  | -0.1005 | -0.3392 | -0.4769 | -0.8381 | -0.266 |
| 9                    | 0.6911                    | 1.3042  | 0.0001  | -0.2445 | 0.3487  | -0.1458 | -0.3759  | -0.0948 | -0.3090 | -0.4773 | -0.8349 | -0.263 |
| Dipole mement (in D) | 1.67 (DEN)                |         | 2.33    | 0.17    | 1.12    | 1.17    | 1.85     | 1.71    | 2.20    | 1.26    | 1.71    |        |

File TZVPMol217.out

Molecule PMol217 diaminoborane

SP Mol217 B3LYP/Def2TZVP VAC.

0 8

|                      |                           |         |         |         |         |         |          |         |         |         |         |        |
|----------------------|---------------------------|---------|---------|---------|---------|---------|----------|---------|---------|---------|---------|--------|
| Dipole               | 0.0000                    | 0.0000  | -1.3600 | 1.3600  |         |         |          |         |         |         |         |        |
| Quadrupole           | -4.3617                   | 4.1098  | 0.2520  | 0.0000  | 0.0000  | 0.0000  |          |         |         |         |         |        |
|                      | Atomic coordinates (in A) |         |         | Mul.    | Lowdin  | Hirsch. | I-Hirsch | CM5     | ESP     | NPA     | AIM     | ACP    |
| 5                    | 0.0000                    | 0.0000  | 0.4994  | 0.1921  | -0.7374 | 0.0996  | 0.8464   | -0.0284 | 0.7912  | 0.6507  | 2.1256  | 0.479  |
| 7                    | 0.0000                    | 1.2359  | -0.1755 | -0.5022 | 0.0070  | -0.2268 | -1.0447  | -0.6184 | -1.1228 | -1.0370 | -1.4854 | -0.698 |
| 1                    | 0.0000                    | 1.3422  | -1.1739 | 0.2037  | 0.1637  | 0.1053  | 0.3596   | 0.3034  | 0.4291  | 0.3729  | 0.3642  | 0.246  |
| 7                    | 0.0000                    | -1.2359 | -0.1755 | -0.5022 | 0.0070  | -0.2268 | -1.0447  | -0.6184 | -1.1228 | -1.0370 | -1.4854 | -0.698 |
| 1                    | 0.0000                    | 0.0000  | 1.6896  | -0.0454 | 0.0503  | -0.0762 | -0.1999  | 0.0422  | -0.1861 | -0.0920 | -0.6422 | -0.076 |
| 1                    | 0.0000                    | 2.1121  | 0.3091  | 0.2251  | 0.1728  | 0.1098  | 0.3618   | 0.3080  | 0.3912  | 0.3848  | 0.3791  | 0.251  |
| 1                    | 0.0000                    | -2.1121 | 0.3091  | 0.2251  | 0.1728  | 0.1098  | 0.3618   | 0.3080  | 0.3912  | 0.3848  | 0.3791  | 0.251  |
| 1                    | 0.0000                    | -1.3422 | -1.1739 | 0.2037  | 0.1637  | 0.1053  | 0.3596   | 0.3034  | 0.4291  | 0.3729  | 0.3642  | 0.246  |
| Dipole mement (in D) | 1.36 (DEN)                |         | 0.69    | 2.71    | 0.86    | 0.81    | 1.19     | 1.40    | 0.50    | 0.59    | 0.32    |        |

File TZVPMol218.out

Molecule PMol218 BH3B†CO\_adduct

SP Mol218 B3LYP/Def2TZVP VAC.

0 6

|            |                           |        |         |        |        |         |          |     |     |     |     |     |
|------------|---------------------------|--------|---------|--------|--------|---------|----------|-----|-----|-----|-----|-----|
| Dipole     | 0.0000                    | 0.0000 | 1.3128  | 1.3128 |        |         |          |     |     |     |     |     |
| Quadrupole | 1.1877                    | 1.1877 | -2.3754 | 0.0000 | 0.0000 | 0.0000  |          |     |     |     |     |     |
|            | Atomic coordinates (in A) |        |         | Mul.   | Lowdin | Hirsch. | I-Hirsch | CM5 | ESP | NPA | AIM | ACP |

|   |         |         |         |         |         |         |         |         |         |         |         |        |
|---|---------|---------|---------|---------|---------|---------|---------|---------|---------|---------|---------|--------|
| 8 | 0.0000  | 0.0000  | 1.3095  | -0.0181 | 0.3397  | -0.0612 | -0.2536 | -0.1062 | -0.1644 | -0.3926 | -1.1342 | -0.201 |
| 1 | 0.0000  | 1.1605  | -1.6352 | 0.0090  | 0.1086  | -0.0408 | -0.0442 | 0.0615  | -0.0554 | 0.0840  | -0.5038 | -0.054 |
| 1 | -1.0050 | -0.5802 | -1.6352 | 0.0090  | 0.1086  | -0.0408 | -0.0442 | 0.0615  | -0.0557 | 0.0840  | -0.5038 | -0.054 |
| 1 | 1.0050  | -0.5802 | -1.6352 | 0.0090  | 0.1086  | -0.0408 | -0.0442 | 0.0615  | -0.0554 | 0.0840  | -0.5038 | -0.054 |
| 5 | 0.0000  | 0.0000  | -1.3260 | -0.3366 | -0.6910 | -0.0957 | -0.2558 | -0.4639 | -0.1048 | -0.6674 | 1.7536  | 0.017  |
| 6 | 0.0000  | 0.0000  | 0.1766  | 0.3277  | 0.0256  | 0.2793  | 0.6418  | 0.3857  | 0.4357  | 0.8078  | 0.8936  | 0.379  |

Dipole mement (in D) 1.31 (DEN) 2.10 4.00 1.42 1.62 1.16 1.31 0.49 5.67 0.43

-----  
File TZVPMol219.out

Molecule PMol219 BH3‡NH3\_adduct

SP Mol219 B3LYP/Def2TZVP VAC.

0 8

Dipole 0.0000 0.0000 5.4080 5.4080  
 Quadropole 0.1022 0.1022 -0.2045 0.0000 0.0000 0.0000

|   | Atomic coordinates (in A) |         |         | Mul.    | Lowdin  | Hirsch. | I-Hirsch | CM5     | ESP     | NPA     | AIM     | ACP    |
|---|---------------------------|---------|---------|---------|---------|---------|----------|---------|---------|---------|---------|--------|
| 5 | 0.0000                    | 0.0000  | -0.9281 | -0.1903 | -0.7467 | -0.0911 | 0.1988   | -0.4042 | 0.3063  | -0.2089 | 1.8515  | 0.025  |
| 7 | 0.0000                    | 0.0000  | 0.7235  | -0.4292 | 0.0930  | -0.0350 | -0.8506  | -0.6091 | -0.3766 | -0.8053 | -1.0945 | -0.532 |
| 1 | 0.0000                    | 0.9424  | 1.0943  | 0.2692  | 0.1876  | 0.1532  | 0.3860   | 0.3431  | 0.2518  | 0.3957  | 0.3949  | 0.284  |
| 1 | 0.0000                    | -1.1624 | -1.2357 | -0.0627 | 0.0303  | -0.1111 | -0.1688  | -0.0054 | -0.2282 | -0.0576 | -0.6471 | -0.115 |
| 1 | 0.8162                    | -0.4712 | 1.0943  | 0.2692  | 0.1876  | 0.1532  | 0.3860   | 0.3431  | 0.2518  | 0.3957  | 0.3949  | 0.284  |
| 1 | -0.8162                   | -0.4712 | 1.0943  | 0.2692  | 0.1876  | 0.1532  | 0.3860   | 0.3431  | 0.2516  | 0.3957  | 0.3949  | 0.284  |
| 1 | -1.0066                   | 0.5812  | -1.2357 | -0.0627 | 0.0303  | -0.1111 | -0.1688  | -0.0054 | -0.2285 | -0.0576 | -0.6471 | -0.115 |
| 1 | 1.0066                    | 0.5812  | -1.2357 | -0.0627 | 0.0303  | -0.1111 | -0.1688  | -0.0054 | -0.2282 | -0.0576 | -0.6471 | -0.115 |

Dipole mement (in D) 5.41 (DEN) 4.72 6.07 4.68 5.25 5.19 5.36 5.40 5.69 4.58

-----  
File TZVPMol220.out

Molecule PMol220 BF3‡NH3\_adduct

SP Mol220 B3LYP/Def2TZVP VAC.

0 8

Dipole 0.0000 0.0000 6.0093 6.0093  
 Quadropole -3.3023 -3.3023 6.6046 0.0000 0.0000 0.0000

|   | Atomic coordinates (in A) |         |         | Mul.    | Lowdin  | Hirsch. | I-Hirsch | CM5     | ESP     | NPA     | AIM     | ACP    |
|---|---------------------------|---------|---------|---------|---------|---------|----------|---------|---------|---------|---------|--------|
| 5 | 0.0000                    | 0.0000  | -0.2265 | 0.5984  | -1.4260 | 0.2440  | 1.2556   | 0.0796  | 0.9637  | 1.2562  | 2.4407  | 0.640  |
| 7 | 0.0000                    | 0.0000  | 1.4762  | -0.4576 | 0.1074  | -0.0567 | -1.0747  | -0.6146 | -0.7326 | -0.8930 | -1.1084 | -0.553 |
| 1 | 0.8205                    | 0.4737  | 1.8350  | 0.2727  | 0.1920  | 0.1580  | 0.4096   | 0.3492  | 0.3406  | 0.4056  | 0.4106  | 0.285  |
| 1 | 0.0000                    | -0.9475 | 1.8350  | 0.2727  | 0.1920  | 0.1580  | 0.4096   | 0.3492  | 0.3400  | 0.4056  | 0.4106  | 0.285  |
| 1 | -0.8205                   | 0.4737  | 1.8350  | 0.2727  | 0.1920  | 0.1580  | 0.4096   | 0.3492  | 0.3402  | 0.4056  | 0.4106  | 0.285  |
| 9 | 0.0000                    | 1.3232  | -0.5447 | -0.3196 | 0.2476  | -0.2204 | -0.4699  | -0.1708 | -0.4175 | -0.5266 | -0.8545 | -0.314 |
| 9 | -1.1459                   | -0.6616 | -0.5447 | -0.3196 | 0.2476  | -0.2204 | -0.4699  | -0.1708 | -0.4169 | -0.5266 | -0.8545 | -0.314 |
| 9 | 1.1459                    | -0.6616 | -0.5447 | -0.3196 | 0.2476  | -0.2204 | -0.4699  | -0.1708 | -0.4175 | -0.5266 | -0.8545 | -0.314 |

Dipole mement (in D) 6.01 (DEN) 5.82 5.45 5.24 5.53 6.13 6.03 7.16 7.05 5.39

-----  
File TZVPMol221.out

Molecule PMol221 hydrogen fluoride

SP Mol221 B3LYP/Def2TZVP VAC.

0 2

Dipole 0.0000 0.0000 -1.9213 1.9213

Quadrupole -0.6854 -0.6854 1.3708 0.0000 0.0000 0.0000

Atomic coordinates (in A)

|   | Mul.   | Lowdin | Hirsch. | I-Hirsch | CM5     | ESP     | NPA     | AIM     | ACP     |         |         |         |
|---|--------|--------|---------|----------|---------|---------|---------|---------|---------|---------|---------|---------|
| 9 | 0.0000 | 0.0000 | 0.0917  | -0.4000  | -0.1802 | -0.2211 | -0.5198 | -0.2900 | -0.4416 | -0.5460 | -0.7093 | -0.3108 |
| 1 | 0.0000 | 0.0000 | -0.8255 | 0.4000   | 0.1802  | 0.2211  | 0.5198  | 0.2900  | 0.4416  | 0.5460  | 0.7093  | 0.3108  |

Dipole moment (in D) 1.92 (DEN) 1.76 0.79 0.97 2.29 1.28 1.95 2.41 3.12 1.37

-----  
File TZVPMol222.out

Molecule PMol222 fluorocyclohexane(axial)

SP Mol222 B3LYP/Def2TZVP VAC.

0 18

Dipole -1.7820 -0.0794 0.0000 1.7838

Quadrupole -2.9394 1.5990 1.3404 1.6531 0.0000 0.0000

Atomic coordinates (in A)

|   | Mul.    | Lowdin  | Hirsch. | I-Hirsch | CM5     | ESP     | NPA     | AIM     | ACP     |         |         |         |
|---|---------|---------|---------|----------|---------|---------|---------|---------|---------|---------|---------|---------|
| 6 | -0.2837 | 0.9075  | 1.2549  | -0.1729  | -0.2578 | -0.0493 | -0.1530 | -0.1587 | 0.0717  | -0.3906 | 0.0408  | -0.1479 |
| 6 | -0.9501 | 1.4548  | 0.0000  | -0.1731  | -0.2602 | -0.0487 | -0.1501 | -0.1587 | -0.0498 | -0.3849 | 0.0397  | -0.1460 |
| 6 | -0.2837 | 0.9075  | -1.2549 | -0.1729  | -0.2578 | -0.0493 | -0.1530 | -0.1587 | 0.0717  | -0.3906 | 0.0408  | -0.1479 |
| 6 | -0.2837 | -0.6153 | -1.2595 | -0.1684  | -0.2417 | -0.0546 | -0.2812 | -0.1603 | -0.1511 | -0.4208 | 0.0393  | -0.1542 |
| 6 | 0.3372  | -1.1811 | 0.0000  | 0.1627   | -0.3203 | 0.0804  | 0.3025  | 0.0326  | 0.2941  | 0.2101  | 0.5236  | 0.1156  |
| 6 | -0.2837 | -0.6153 | 1.2595  | -0.1684  | -0.2417 | -0.0546 | -0.2812 | -0.1603 | -0.1511 | -0.4208 | 0.0394  | -0.1542 |
| 1 | -0.7782 | 1.2834  | -2.1517 | 0.0923   | 0.1320  | 0.0286  | 0.0849  | 0.0834  | -0.0103 | 0.2024  | -0.0125 | 0.0787  |
| 1 | -2.0096 | 1.1742  | 0.0000  | 0.0753   | 0.1325  | 0.0231  | 0.0777  | 0.0787  | 0.0200  | 0.1836  | -0.0251 | 0.0698  |
| 1 | 0.7485  | 1.2640  | 1.3024  | 0.0953   | 0.1392  | 0.0284  | 0.0904  | 0.0854  | 0.0130  | 0.2013  | 0.0002  | 0.0704  |
| 1 | -0.7782 | 1.2834  | 2.1517  | 0.0923   | 0.1320  | 0.0286  | 0.0849  | 0.0834  | -0.0103 | 0.2024  | -0.0125 | 0.0787  |
| 1 | -1.3104 | -0.9895 | -1.3217 | 0.0802   | 0.1417  | 0.0317  | 0.0972  | 0.0879  | 0.0380  | 0.1979  | -0.0106 | 0.0791  |
| 1 | 0.2434  | -1.0088 | -2.1295 | 0.0976   | 0.1382  | 0.0333  | 0.0991  | 0.0893  | 0.0480  | 0.2124  | 0.0037  | 0.0795  |
| 1 | 0.2885  | -2.2744 | 0.0000  | 0.0639   | 0.1337  | 0.0332  | 0.0396  | 0.0922  | 0.0039  | 0.1619  | 0.0120  | 0.0776  |
| 1 | -1.3104 | -0.9895 | 1.3217  | 0.0802   | 0.1417  | 0.0317  | 0.0972  | 0.0879  | 0.0380  | 0.1979  | -0.0106 | 0.0791  |
| 1 | 0.2434  | -1.0088 | 2.1295  | 0.0976   | 0.1382  | 0.0333  | 0.0991  | 0.0893  | 0.0480  | 0.2124  | 0.0037  | 0.0795  |
| 1 | 0.7485  | 1.2640  | -1.3024 | 0.0953   | 0.1392  | 0.0284  | 0.0904  | 0.0854  | 0.0130  | 0.2013  | 0.0002  | 0.0704  |
| 1 | -0.9260 | 2.5457  | 0.0000  | 0.0934   | 0.1323  | 0.0290  | 0.0818  | 0.0837  | -0.0022 | 0.2037  | -0.0116 | 0.0791  |
| 9 | 1.7030  | -0.8546 | 0.0000  | -0.2703  | 0.0787  | -0.1532 | -0.2260 | -0.1822 | -0.2846 | -0.3794 | -0.6610 | -0.2073 |

Dipole moment (in D) 1.78 (DEN) 2.07 0.60 1.26 1.54 1.76 1.78 3.34 4.43 1.87

-----  
File TZVPMol223.out

Molecule PMol223 fluorocyclohexane(equato)

SP Mol223 B3LYP/Def2TZVP VAC.

0 18

Dipole 0.1753 -2.1264 0.0000 2.1336



```

Quadrupole      2.3257  -4.7361   2.4104   1.0614   0.0000   0.0000
Atomic coordinates (in A)      Mul.      Lowdin      Hirsch.      I-Hirsch      CM5      ESP      NPA      AIM      ACP
6      -0.5743   0.9009   0.0000   0.1530  -0.3296   0.0778   0.3071   0.0309   0.3530   0.2161   0.5398   0.1145
6      0.0885   0.3765   1.2529  -0.1647  -0.2394  -0.0559  -0.2891  -0.1617  -0.1842  -0.4202  0.0384  -0.1559
6      0.0885  -1.1474   1.2557  -0.1867  -0.2558  -0.0456  -0.1422  -0.1558  -0.0034  -0.3858  0.0383  -0.1438
6      0.7476  -1.7018   0.0000  -0.1602  -0.2609  -0.0483  -0.1592  -0.1587  -0.0566  -0.3868  0.0404  -0.1461
6      0.0885  -1.1474  -1.2557  -0.1867  -0.2558  -0.0456  -0.1422  -0.1558  -0.0034  -0.3858  0.0381  -0.1438
6      0.0885   0.3765  -1.2529  -0.1647  -0.2394  -0.0559  -0.2891  -0.1617  -0.1842  -0.4202  0.0380  -0.1559
1      0.5862  -1.5202   2.1517   0.0976   0.1339   0.0314   0.0888   0.0862   0.0222   0.2073  -0.0061   0.0818
1      1.1159   0.7519   1.2799   0.0847   0.1398   0.0310   0.1010   0.0881   0.0733   0.1980  -0.0023   0.0740
1     -1.6384   0.6278   0.0000   0.0538   0.1352   0.0305   0.0402   0.0906   0.0196   0.1449   0.0055   0.0716
1      1.8084  -1.4308   0.0000   0.0813   0.1350   0.0267   0.0842   0.0825   0.0301   0.1892  -0.0176   0.0740
1      0.7121  -2.7923   0.0000   0.0953   0.1329   0.0295   0.0830   0.0842   0.0166   0.2045  -0.0105   0.0797
1      0.5862  -1.5202  -2.1517   0.0976   0.1339   0.0314   0.0888   0.0862   0.0222   0.2073  -0.0061   0.0818
1      1.1159   0.7519  -1.2799   0.0847   0.1398   0.0310   0.1010   0.0881   0.0733   0.1980  -0.0023   0.0740
1     -0.4160   0.7759  -2.1333   0.1004   0.1367   0.0333   0.0998   0.0892   0.0557   0.2110   0.0029   0.0792
1     -0.9434  -1.5099   1.3116   0.0849   0.1351   0.0264   0.0807   0.0822   0.0156   0.1892  -0.0182   0.0736
1     -0.4160   0.7759   2.1333   0.1004   0.1367   0.0333   0.0998   0.0892   0.0557   0.2110   0.0029   0.0792
1     -0.9434  -1.5099  -1.3116   0.0849   0.1351   0.0264   0.0807   0.0822   0.0156   0.1892  -0.0182   0.0736
9     -0.5256   2.2951   0.0000  -0.2553   0.0867  -0.1571  -0.2334  -0.1855  -0.3208  -0.3670  -0.6633  -0.2113

Dipole mement (in D)   2.13 (DEN)   2.37   0.69   1.56   1.99   2.06   2.16   3.59   4.96   2.12

```

-----  
File TZVPMol224.out

Molecule PMol224 1,2-difluoroethane(gauch  
SP Mol224 B3LYP/Def2TZVP VAC.

0 8

```

Dipole      0.0000   0.0000   2.6748   2.6748
Quadrupole  1.6550  -2.6589   1.0039   1.5925   0.0000   0.0000
Atomic coordinates (in A)      Mul.      Lowdin      Hirsch.      I-Hirsch      CM5      ESP      NPA      AIM      ACP
6      0.2603   0.7009   0.5110   0.0619  -0.3344   0.0523   0.0552  -0.0313   0.1456   0.0141   0.5740   0.0160
1     -0.0247   1.2010   1.4407   0.0857   0.1242   0.0456   0.0711   0.1014   0.0344   0.1634   0.0320   0.0936
1      1.3492   0.7109   0.4262   0.0980   0.1239   0.0463   0.0771   0.1031   0.0655   0.1698   0.0453   0.0886
6     -0.2603  -0.7009   0.5110   0.0619  -0.3344   0.0523   0.0552  -0.0313   0.1103   0.0141   0.5744   0.0160
1      0.0247  -1.2010   1.4407   0.0857   0.1242   0.0456   0.0711   0.1014   0.0424   0.1634   0.0320   0.0936
1     -1.3492  -0.7109   0.4262   0.0980   0.1239   0.0463   0.0771   0.1031   0.0735   0.1698   0.0453   0.0886
9      0.2603  -1.4149  -0.5481  -0.2457   0.0863  -0.1442  -0.2035  -0.1732  -0.2330  -0.3473  -0.6517  -0.1982
9     -0.2603   1.4149  -0.5481  -0.2457   0.0863  -0.1442  -0.2035  -0.1732  -0.2387  -0.3473  -0.6517  -0.1982

Dipole mement (in D)   2.67 (DEN)   3.19   0.13   1.84   2.64   2.58   2.69   4.85   6.88   2.78

```

-----  
File TZVPMol225.out

Molecule PMol225 1-fluoropropane(gauche)  
SP Mol225 B3LYP/Def2TZVP VAC.

0 11

```

Dipole      -1.0100   1.4616   0.4534   1.8336

```

Quadrupole      -1.2572      0.2932      0.9640      1.7066      0.6871      -0.0080  
 Atomic coordinates (in A)      Mul.      Lowdin      Hirsch.      I-Hirsch      CM5      ESP      NPA      AIM      ACP  
 6      -1.5208      -0.4787      0.1172      -0.3337      -0.3077      -0.0845      -0.3331      -0.2354      -0.1690      -0.5924      0.0132      -0.2500  
 1      -1.6380      -0.5311      1.2002      0.0970      0.1170      0.0285      0.0992      0.0805      0.0437      0.1954      -0.0077      0.0804  
 1      -1.1339      -1.4403      -0.2150      0.1238      0.1222      0.0317      0.1096      0.0847      0.0539      0.2108      0.0157      0.0770  
 1      -2.5121      -0.3546      -0.3143      0.1113      0.1177      0.0312      0.1052      0.0827      0.0388      0.2047      -0.0017      0.0848  
 6      -0.5915      0.6511      -0.2823      -0.1436      -0.3025      -0.0493      -0.2140      -0.1595      0.1062      -0.4248      0.0560      -0.1403  
 1      -0.9907      1.6129      0.0489      0.0832      0.1390      0.0355      0.0972      0.0904      -0.0196      0.2015      -0.0037      0.0855  
 1      -0.5125      0.7151      -1.3697      0.0939      0.1365      0.0340      0.0979      0.0896      0.0126      0.2018      0.0031      0.0805  
 6      0.7909      0.5094      0.2963      0.0582      -0.3228      0.0547      0.1411      -0.0325      0.1156      0.0601      0.5511      0.0192  
 1      1.4374      1.3457      0.0199      0.0929      0.1163      0.0362      0.0537      0.0918      0.0303      0.1575      0.0186      0.0839  
 1      0.7646      0.4425      1.3885      0.0799      0.1166      0.0344      0.0558      0.0904      0.0430      0.1504      0.0159      0.0811  
 9      1.3904      -0.6534      -0.1717      -0.2628      0.0675      -0.1525      -0.2127      -0.1825      -0.2554      -0.3650      -0.6596      -0.2021  
  
 Dipole mement (in D)      1.83 (DEN)      2.14      0.44      1.27      1.69      1.76      1.82      3.24      4.51      1.88

-----  
 File TZVPMol226.out  
 Molecule PMol226      1-fluoropropane(trans)  
 SP Mol226 B3LYP/Def2TZVP VAC.  
 0      11

Dipole      1.8420      0.5851      0.0001      1.9327  
 Quadrupole      -3.1587      1.4471      1.7115      -1.1173      -0.0001      0.0000  
 Atomic coordinates (in A)      Mul.      Lowdin      Hirsch.      I-Hirsch      CM5      ESP      NPA      AIM      ACP  
 6      1.8557      0.1391      -0.0000      -0.3508      -0.3049      -0.0798      -0.3239      -0.2316      -0.3169      -0.5904      0.0104      -0.2452  
 1      1.9903      0.7714      0.8780      0.1062      0.1182      0.0303      0.1003      0.0821      0.0702      0.1979      -0.0042      0.0827  
 1      1.9903      0.7717      -0.8778      0.1062      0.1182      0.0303      0.1003      0.0821      0.0702      0.1979      -0.0042      0.0827  
 1      2.6615      -0.5914      -0.0001      0.1181      0.1203      0.0350      0.1104      0.0865      0.0916      0.2110      0.0064      0.0890  
 6      0.4957      -0.5328      -0.0001      -0.1369      -0.2984      -0.0507      -0.2199      -0.1611      0.1204      -0.4242      0.0569      -0.1427  
 1      0.3865      -1.1782      0.8733      0.0936      0.1351      0.0340      0.0989      0.0897      0.0052      0.2011      0.0036      0.0798  
 1      0.3865      -1.1780      -0.8737      0.0936      0.1351      0.0340      0.0989      0.0897      0.0052      0.2011      0.0036      0.0798  
 6      -0.6182      0.4801      0.0001      0.0651      -0.3249      0.0538      0.1452      -0.0329      0.1999      0.0654      0.5578      0.0187  
 1      -0.5743      1.1237      0.8843      0.0810      0.1156      0.0342      0.0553      0.0902      0.0229      0.1499      0.0154      0.0804  
 1      -0.5744      1.1239      -0.8840      0.0810      0.1156      0.0342      0.0553      0.0902      0.0229      0.1499      0.0154      0.0804  
 9      -1.8518      -0.1513      0.0000      -0.2570      0.0703      -0.1553      -0.2208      -0.1849      -0.2917      -0.3596      -0.6605      -0.2057  
  
 Dipole mement (in D)      1.93 (DEN)      2.20      0.57      1.42      1.69      1.91      1.96      3.40      4.70      1.96

-----  
 File TZVPMol227.out  
 Molecule PMol227      fluoromethane  
 SP Mol227 B3LYP/Def2TZVP VAC.  
 0      5

Dipole      0.0000      -1.8108      0.0000      1.8108  
 Quadrupole      0.2012      -0.4023      0.2011      0.0000      0.0000  
 Atomic coordinates (in A)      Mul.      Lowdin      Hirsch.      I-Hirsch      CM5      ESP      NPA      AIM      ACP  
 9      0.0000      0.7480      0.0000      -0.2586      0.0543      -0.1523      -0.1983      -0.1831      -0.2401      -0.3500      -0.6570      -0.1995  
 6      0.0000      -0.6275      0.0000      -0.0619      -0.3470      0.0295      -0.0302      -0.0967      0.1118      -0.1177      0.5683      -0.0788

|   |         |         |         |        |        |        |        |        |        |        |        |        |
|---|---------|---------|---------|--------|--------|--------|--------|--------|--------|--------|--------|--------|
| 1 | 1.0282  | -0.9890 | 0.0000  | 0.1068 | 0.0976 | 0.0410 | 0.0762 | 0.0933 | 0.0429 | 0.1559 | 0.0296 | 0.0928 |
| 1 | -0.5141 | -0.9890 | 0.8905  | 0.1068 | 0.0976 | 0.0410 | 0.0762 | 0.0933 | 0.0427 | 0.1559 | 0.0296 | 0.0928 |
| 1 | -0.5141 | -0.9890 | -0.8905 | 0.1068 | 0.0976 | 0.0410 | 0.0762 | 0.0933 | 0.0427 | 0.1559 | 0.0296 | 0.0928 |

Dipole mement (in D) 1.81 (DEN) 2.26 0.15 1.22 1.71 1.70 1.81 3.12 4.49 1.80

-----  
 File TZVPMol228.out  
 Molecule PMol228 1,1-difluoroethane  
 SP Mol228 B3LYP/Def2TZVP VAC.  
 0 8

|            |                           |         |         |         |         |         |          |         |         |         |         |         |
|------------|---------------------------|---------|---------|---------|---------|---------|----------|---------|---------|---------|---------|---------|
| Dipole     | -0.3609                   | 2.1961  | 0.0000  | 2.2256  |         |         |          |         |         |         |         |         |
| Quadrupole | 1.7108                    | 0.3555  | -2.0663 | 0.4799  | 0.0000  | 0.0000  |          |         |         |         |         |         |
|            | Atomic coordinates (in A) |         |         | Mul.    | Lowdin  | Hirsch. | I-Hirsch | CM5     | ESP     | NPA     | AIM     | ACP     |
| 1          | 1.2679                    | 0.7165  | 0.0000  | 0.0629  | 0.1175  | 0.0439  | 0.0202   | 0.1039  | 0.0104  | 0.1232  | 0.0522  | 0.0842  |
| 6          | 0.3210                    | 0.1651  | 0.0000  | 0.3177  | -0.4885 | 0.1743  | 0.5806   | 0.1517  | 0.5716  | 0.5546  | 1.1387  | 0.2806  |
| 6          | -0.8955                   | 1.0337  | 0.0000  | -0.2986 | -0.2833 | -0.0902 | -0.5513  | -0.2346 | -0.4479 | -0.6579 | 0.0212  | -0.2592 |
| 9          | 0.3210                    | -0.6476 | 1.0939  | -0.2183 | 0.1316  | -0.1335 | -0.2417  | -0.1600 | -0.2684 | -0.3416 | -0.6552 | -0.1948 |
| 9          | 0.3210                    | -0.6476 | -1.0939 | -0.2183 | 0.1316  | -0.1335 | -0.2417  | -0.1600 | -0.2684 | -0.3416 | -0.6552 | -0.1948 |
| 1          | -1.7889                   | 0.4138  | 0.0000  | 0.1217  | 0.1307  | 0.0468  | 0.1480   | 0.1007  | 0.1571  | 0.2240  | 0.0397  | 0.0913  |
| 1          | -0.9047                   | 1.6664  | -0.8836 | 0.1164  | 0.1302  | 0.0461  | 0.1429   | 0.0991  | 0.1229  | 0.2196  | 0.0293  | 0.0964  |
| 1          | -0.9047                   | 1.6664  | 0.8836  | 0.1164  | 0.1302  | 0.0461  | 0.1429   | 0.0991  | 0.1229  | 0.2196  | 0.0293  | 0.0964  |

Dipole mement (in D) 2.23 (DEN) 2.52 0.68 1.53 1.88 2.12 2.24 3.71 5.85 2.17

-----  
 File TZVPMol229.out  
 Molecule PMol229 fluoroethane  
 SP Mol229 B3LYP/Def2TZVP VAC.  
 0 8

|            |                           |         |         |         |         |         |          |         |         |         |         |         |
|------------|---------------------------|---------|---------|---------|---------|---------|----------|---------|---------|---------|---------|---------|
| Dipole     | -1.7648                   | 0.7043  | 0.0000  | 1.9001  |         |         |          |         |         |         |         |         |
| Quadrupole | -1.6946                   | 0.8548  | 0.8397  | 0.2751  | 0.0000  | 0.0000  |          |         |         |         |         |         |
|            | Atomic coordinates (in A) |         |         | Mul.    | Lowdin  | Hirsch. | I-Hirsch | CM5     | ESP     | NPA     | AIM     | ACP     |
| 6          | -1.1200                   | -0.4454 | 0.0000  | -0.3040 | -0.3121 | -0.0863 | -0.4194  | -0.2354 | -0.2545 | -0.6293 | 0.0174  | -0.2510 |
| 1          | -1.0767                   | -1.0817 | 0.8818  | 0.1133  | 0.1215  | 0.0375  | 0.1195   | 0.0899  | 0.0809  | 0.2092  | 0.0152  | 0.0872  |
| 1          | -1.0767                   | -1.0817 | -0.8818 | 0.1133  | 0.1215  | 0.0375  | 0.1195   | 0.0899  | 0.0809  | 0.2092  | 0.0152  | 0.0872  |
| 1          | -2.0810                   | 0.0668  | 0.0000  | 0.1008  | 0.1250  | 0.0394  | 0.1194   | 0.0910  | 0.0530  | 0.2098  | 0.0096  | 0.0930  |
| 6          | 0.0000                    | 0.5528  | 0.0000  | 0.0644  | -0.3492 | 0.0568  | 0.1638   | -0.0320 | 0.3675  | 0.0576  | 0.5632  | 0.0238  |
| 1          | -0.0256                   | 1.1951  | -0.8839 | 0.0862  | 0.1141  | 0.0361  | 0.0570   | 0.0915  | -0.0131 | 0.1526  | 0.0188  | 0.0837  |
| 1          | -0.0256                   | 1.1951  | 0.8839  | 0.0862  | 0.1141  | 0.0361  | 0.0570   | 0.0915  | -0.0131 | 0.1526  | 0.0188  | 0.0837  |
| 9          | 1.2228                    | -0.1042 | 0.0000  | -0.2604 | 0.0653  | -0.1570 | -0.2167  | -0.1865 | -0.3015 | -0.3617 | -0.6586 | -0.2077 |

Dipole mement (in D) 1.90 (DEN) 2.24 0.51 1.33 1.71 1.81 1.90 3.31 4.61 1.89

-----  
 File TZVPMol230.out  
 Molecule PMol230 2-fluoropropane  
 SP Mol230 B3LYP/Def2TZVP VAC.

```

0 11
Dipole      -1.5079  -1.2048   0.0000   1.9301
Quadrupole  -0.2854  -0.7533   1.0387  -1.5785   0.0000   0.0000
  Atomic coordinates (in A)      Mul.      Lowdin      Hirsch.      I-Hirsch      CM5      ESP      NPA      AIM      ACP
6  -0.2792  -0.5811   1.2623  -0.3129  -0.2849  -0.0888  -0.4551  -0.2360  -0.4501  -0.6214  0.0147  -0.2560
6  -0.2792   0.2399   0.0000   0.1727  -0.3831   0.0848   0.3500   0.0329   0.5746   0.2077  0.5527   0.1289
6  -0.2792  -0.5811  -1.2623  -0.3129  -0.2849  -0.0888  -0.4551  -0.2360  -0.4501  -0.6214  0.0146  -0.2560
9   0.8702   1.0405   0.0000  -0.2627   0.0772  -0.1593  -0.2260  -0.1877  -0.3298  -0.3714  -0.6592  -0.2138
1  -1.1263   0.9348   0.0000   0.0618   0.1318   0.0334   0.0454   0.0922  -0.0304   0.1494  0.0124   0.0774
1  -0.2328   0.0554  -2.1432   0.1189   0.1235   0.0371   0.1226   0.0898   0.1142   0.2148  0.0157   0.0863
1  -0.2328   0.0554   2.1432   0.1189   0.1235   0.0371   0.1226   0.0898   0.1142   0.2148  0.0157   0.0863
1   0.5770  -1.2548   1.2812   0.1072   0.1232   0.0354   0.1245   0.0885   0.1252   0.2064  0.0113   0.0841
1  -1.1845  -1.1835   1.3262   0.1009   0.1253   0.0368   0.1234   0.0891   0.1035   0.2074  0.0057   0.0893
1  -1.1845  -1.1835  -1.3262   0.1009   0.1253   0.0368   0.1234   0.0891   0.1035   0.2074  0.0057   0.0893
1   0.5770  -1.2548  -1.2812   0.1072   0.1232   0.0354   0.1245   0.0885   0.1252   0.2064  0.0113   0.0841

Dipole mement (in D)   1.93 (DEN)   2.20   0.73   1.35   1.65   1.86   1.96   3.46   4.64   1.91

```

-----  
File TZVPMol231.out

Molecule PMol231 difluoromethane  
SP Mol231 B3LYP/Def2TZVP VAC.

```

0 5
Dipole      0.0000   1.8809   0.0000   1.8809
Quadrupole  -2.4136   1.2032   1.2104   0.0001   0.0000   0.0000
  Atomic coordinates (in A)      Mul.      Lowdin      Hirsch.      I-Hirsch      CM5      ESP      NPA      AIM      ACP
9   1.0967  -0.2899   0.0000  -0.2166   0.1211  -0.1276  -0.2285  -0.1554  -0.2239  -0.3335  -0.6529  -0.1853
6   0.0000   0.5001   0.0000   0.2508  -0.4401   0.1564   0.3850   0.0982   0.3707   0.4232   1.1862   0.1823
9  -1.0967  -0.2899   0.0000  -0.2166   0.1212  -0.1276  -0.2285  -0.1554  -0.2242  -0.3335  -0.6529  -0.1853
1   0.0000   1.1091   0.9083   0.0912   0.0989   0.0494   0.0359   0.1063   0.0387   0.1218   0.0598   0.0941
1   0.0000   1.1091  -0.9083   0.0912   0.0989   0.0494   0.0359   0.1063   0.0387   0.1218   0.0598   0.0941

Dipole mement (in D)   1.88 (DEN)   2.18   0.34   1.26   1.94   1.80   1.93   3.24   5.30   1.96

```

-----  
File TZVPMol232.out

Molecule PMol232 trifluoromethane  
SP Mol232 B3LYP/Def2TZVP VAC.

```

0 5
Dipole      -1.2652   0.9458   0.0000   1.5796
Quadrupole   1.0807   0.0878  -1.1685  -1.6812   0.0000   0.0000
  Atomic coordinates (in A)      Mul.      Lowdin      Hirsch.      I-Hirsch      CM5      ESP      NPA      AIM      ACP
1  -1.1467   0.8571   0.0000   0.0714   0.1056   0.0616  -0.0004   0.1233   0.0803   0.1040   0.1036   0.0991
6  -0.2710   0.2026   0.0000   0.4652  -0.6432   0.2626   0.8115   0.2725   0.4648   0.8428   1.8385   0.4294
9   0.8500   0.9231   0.0000  -0.1789   0.1792  -0.1081  -0.2704  -0.1319  -0.1818  -0.3156  -0.6474  -0.1762
9  -0.2710  -0.5767   1.0809  -0.1789   0.1792  -0.1081  -0.2704  -0.1319  -0.1817  -0.3156  -0.6474  -0.1762
9  -0.2710  -0.5767  -1.0809  -0.1789   0.1792  -0.1081  -0.2704  -0.1319  -0.1817  -0.3156  -0.6474  -0.1762

```

Dipole mement (in D) 1.58 (DEN) 1.58 0.65 1.05 1.82 1.53 1.64 2.67 4.90 1.70

-----

File TZVPMol233.out

Molecule PMol233 1,1,1-trifluoroethane

SP Mol233 B3LYP/Def2TZVP VAC.

0 8

Dipole -2.3184 -0.0002 0.0000 2.3184

Quadrupole 1.9607 -0.9804 -0.9803 0.0002 0.0000 0.0000

|   | Atomic coordinates (in A) |         |         | Mul.    | Lowdin  | Hirsch. | I-Hirsch | CM5     | ESP     | NPA     | AIM     | ACP     |
|---|---------------------------|---------|---------|---------|---------|---------|----------|---------|---------|---------|---------|---------|
| 1 | -1.8339                   | -1.0227 | 0.0000  | 0.1293  | 0.1371  | 0.0529  | 0.1651   | 0.1072  | 0.1708  | 0.2298  | 0.0489  | 0.0992  |
| 6 | -1.4696                   | -0.0001 | 0.0000  | -0.3394 | -0.2541 | -0.0906 | -0.6758  | -0.2309 | -0.5298 | -0.6780 | 0.0408  | -0.2645 |
| 6 | 0.0243                    | 0.0000  | 0.0000  | 0.5057  | -0.7171 | 0.2784  | 1.0248   | 0.3231  | 0.6790  | 0.9560  | 1.7586  | 0.5299  |
| 1 | -1.8340                   | 0.5111  | 0.8856  | 0.1292  | 0.1371  | 0.0529  | 0.1651   | 0.1072  | 0.1703  | 0.2298  | 0.0489  | 0.0992  |
| 1 | -1.8340                   | 0.5111  | -0.8856 | 0.1292  | 0.1371  | 0.0529  | 0.1651   | 0.1072  | 0.1703  | 0.2298  | 0.0489  | 0.0992  |
| 9 | 0.5250                    | 1.2465  | 0.0000  | -0.1846 | 0.1866  | -0.1156 | -0.2814  | -0.1379 | -0.2206 | -0.3224 | -0.6487 | -0.1877 |
| 9 | 0.5250                    | -0.6232 | -1.0794 | -0.1847 | 0.1867  | -0.1156 | -0.2814  | -0.1379 | -0.2201 | -0.3224 | -0.6487 | -0.1876 |
| 9 | 0.5250                    | -0.6232 | 1.0794  | -0.1847 | 0.1867  | -0.1156 | -0.2814  | -0.1379 | -0.2201 | -0.3224 | -0.6487 | -0.1876 |

Dipole mement (in D) 2.32 (DEN) 2.36 0.50 1.60 1.60 2.21 2.35 3.61 6.28 2.11

-----

File TZVPMol234.out

Molecule PMol234 pentafluoroethane

SP Mol234 B3LYP/Def2TZVP VAC.

0 8

Dipole -1.5160 -0.0469 0.0000 1.5167

Quadrupole 3.0244 -1.5508 -1.4736 -0.9423 0.0000 0.0000

|   | Atomic coordinates (in A) |         |         | Mul.    | Lowdin  | Hirsch. | I-Hirsch | CM5     | ESP     | NPA     | AIM     | ACP     |
|---|---------------------------|---------|---------|---------|---------|---------|----------|---------|---------|---------|---------|---------|
| 1 | -1.6881                   | 0.6111  | 0.0000  | 0.0908  | 0.1331  | 0.0611  | 0.0648   | 0.1232  | 0.1245  | 0.1453  | 0.0941  | 0.0937  |
| 6 | -0.6021                   | 0.7513  | 0.0000  | 0.2800  | -0.4559 | 0.1632  | 0.2769   | 0.1578  | 0.2203  | 0.4737  | 1.2462  | 0.2605  |
| 6 | 0.1193                    | -0.6031 | 0.0000  | 0.4752  | -0.7085 | 0.2667  | 0.8334   | 0.3242  | 0.4100  | 0.8920  | 1.8514  | 0.5116  |
| 9 | -0.2318                   | 1.4387  | 1.0927  | -0.1817 | 0.1830  | -0.1038 | -0.1943  | -0.1287 | -0.1608 | -0.3059 | -0.6392 | -0.1747 |
| 9 | -0.2318                   | 1.4387  | -1.0927 | -0.1817 | 0.1830  | -0.1038 | -0.1943  | -0.1287 | -0.1608 | -0.3059 | -0.6392 | -0.1747 |
| 9 | 1.4369                    | -0.4480 | 0.0000  | -0.1558 | 0.2302  | -0.0908 | -0.2556  | -0.1118 | -0.1195 | -0.2939 | -0.6352 | -0.1708 |
| 9 | -0.2318                   | -1.2980 | -1.0815 | -0.1633 | 0.2176  | -0.0964 | -0.2655  | -0.1180 | -0.1568 | -0.3026 | -0.6392 | -0.1728 |
| 9 | -0.2318                   | -1.2980 | 1.0815  | -0.1633 | 0.2176  | -0.0964 | -0.2655  | -0.1180 | -0.1568 | -0.3026 | -0.6392 | -0.1728 |

Dipole mement (in D) 1.52 (DEN) 1.60 0.54 1.00 1.59 1.49 1.53 2.72 4.84 1.63

-----

File TZVPMol235.out

Molecule PMol235 1,1,1,2,2,3,3-heptafluor

SP Mol235 B3LYP/Def2TZVP VAC.

0 11

Dipole 1.1404 0.9376 0.0009 1.4763

Quadrupole 2.4815 -0.4100 -2.0715 3.1722 0.0028 0.0015

|  | Atomic coordinates (in A) |  |  | Mul. | Lowdin | Hirsch. | I-Hirsch | CM5 | ESP | NPA | AIM | ACP |
|--|---------------------------|--|--|------|--------|---------|----------|-----|-----|-----|-----|-----|
|--|---------------------------|--|--|------|--------|---------|----------|-----|-----|-----|-----|-----|

|   |         |         |         |         |         |         |         |         |         |         |         |         |
|---|---------|---------|---------|---------|---------|---------|---------|---------|---------|---------|---------|---------|
| 6 | 1.5495  | 0.1268  | 0.0002  | 0.2685  | -0.4509 | 0.1658  | 0.3796  | 0.1599  | 0.2908  | 0.5036  | 1.2396  | 0.2641  |
| 6 | 0.1130  | 0.6722  | 0.0003  | 0.3388  | -0.5019 | 0.1689  | 0.2879  | 0.2101  | 0.1872  | 0.5238  | 1.2262  | 0.3442  |
| 1 | 2.2479  | 0.9720  | 0.0009  | 0.1004  | 0.1367  | 0.0610  | 0.0586  | 0.1234  | 0.1235  | 0.1479  | 0.0965  | 0.0921  |
| 6 | -1.0286 | -0.3729 | -0.0002 | 0.4510  | -0.6927 | 0.2670  | 0.8314  | 0.3286  | 0.5480  | 0.9050  | 1.8829  | 0.5088  |
| 9 | 1.7539  | -0.6270 | -1.0924 | -0.1818 | 0.1857  | -0.1028 | -0.2034 | -0.1279 | -0.1778 | -0.3062 | -0.6398 | -0.1753 |
| 9 | 1.7535  | -0.6285 | 1.0919  | -0.1818 | 0.1857  | -0.1028 | -0.2034 | -0.1279 | -0.1778 | -0.3062 | -0.6398 | -0.1753 |
| 9 | -0.0324 | 1.4427  | -1.0924 | -0.1697 | 0.2192  | -0.0940 | -0.1907 | -0.1169 | -0.1518 | -0.2959 | -0.6324 | -0.1726 |
| 9 | -0.0326 | 1.4419  | 1.0936  | -0.1697 | 0.2192  | -0.0940 | -0.1907 | -0.1169 | -0.1518 | -0.2959 | -0.6324 | -0.1726 |
| 9 | -0.9579 | -1.1401 | -1.0809 | -0.1517 | 0.2343  | -0.0891 | -0.2567 | -0.1103 | -0.1652 | -0.2918 | -0.6348 | -0.1709 |
| 9 | -0.9587 | -1.1403 | 1.0805  | -0.1517 | 0.2344  | -0.0891 | -0.2567 | -0.1103 | -0.1653 | -0.2918 | -0.6348 | -0.1709 |
| 9 | -2.1981 | 0.2593  | -0.0006 | -0.1524 | 0.2304  | -0.0911 | -0.2560 | -0.1120 | -0.1598 | -0.2927 | -0.6310 | -0.1717 |

Dipole mement (in D) 1.48 (DEN) 1.53 0.46 0.98 1.58 1.47 1.50 2.49 4.69 1.58

-----  
File TZVPMol236.out

Molecule PMol236 2-fluoro-2-methylpropane

SP Mol236 B3LYP/Def2TZVP VAC.

0 14

Dipole -1.9363 0.0001 0.0000 1.9363

Quadrupole -2.2485 1.1245 1.1239 -0.0001 0.0000 0.0000

|   | Atomic coordinates (in A) |         |         | Mul.    | Lowdin  | Hirsch. | I-Hirsch | CM5     | ESP     | NPA     | AIM     | ACP     |
|---|---------------------------|---------|---------|---------|---------|---------|----------|---------|---------|---------|---------|---------|
| 9 | 1.4116                    | -0.0000 | 0.0000  | -0.2652 | 0.0894  | -0.1599 | -0.2297  | -0.1871 | -0.3478 | -0.3822 | -0.6584 | -0.2181 |
| 6 | -0.0018                   | -0.0000 | 0.0000  | 0.2530  | -0.4428 | 0.1131  | 0.5390   | 0.0979  | 0.7624  | 0.3411  | 0.5342  | 0.2360  |
| 6 | -0.4330                   | -1.4501 | 0.0000  | -0.3236 | -0.2587 | -0.0900 | -0.4877  | -0.2354 | -0.5247 | -0.6164 | 0.0152  | -0.2602 |
| 6 | -0.4330                   | 0.7250  | 1.2557  | -0.3237 | -0.2587 | -0.0900 | -0.4877  | -0.2354 | -0.5108 | -0.6164 | 0.0153  | -0.2602 |
| 6 | -0.4330                   | 0.7250  | -1.2557 | -0.3237 | -0.2587 | -0.0900 | -0.4877  | -0.2354 | -0.5108 | -0.6164 | 0.0152  | -0.2602 |
| 1 | -1.5199                   | -1.5280 | 0.0000  | 0.1008  | 0.1261  | 0.0350  | 0.1286   | 0.0879  | 0.1211  | 0.2059  | 0.0026  | 0.0865  |
| 1 | -1.5199                   | 0.7640  | 1.3232  | 0.1009  | 0.1261  | 0.0350  | 0.1286   | 0.0879  | 0.1184  | 0.2059  | 0.0026  | 0.0865  |
| 1 | -1.5199                   | 0.7640  | -1.3232 | 0.1009  | 0.1261  | 0.0350  | 0.1286   | 0.0879  | 0.1184  | 0.2059  | 0.0026  | 0.0865  |
| 1 | -0.0566                   | -1.9645 | 0.8825  | 0.1134  | 0.1252  | 0.0352  | 0.1280   | 0.0886  | 0.1316  | 0.2121  | 0.0119  | 0.0838  |
| 1 | -0.0566                   | 1.7465  | 1.2600  | 0.1134  | 0.1252  | 0.0353  | 0.1280   | 0.0886  | 0.1273  | 0.2121  | 0.0119  | 0.0839  |
| 1 | -0.0567                   | 0.2181  | -2.1425 | 0.1134  | 0.1252  | 0.0352  | 0.1280   | 0.0886  | 0.1280  | 0.2121  | 0.0119  | 0.0838  |
| 1 | -0.0566                   | -1.9645 | -0.8825 | 0.1134  | 0.1252  | 0.0352  | 0.1280   | 0.0886  | 0.1316  | 0.2121  | 0.0119  | 0.0838  |
| 1 | -0.0567                   | 0.2181  | 2.1425  | 0.1134  | 0.1252  | 0.0352  | 0.1280   | 0.0886  | 0.1280  | 0.2121  | 0.0119  | 0.0838  |
| 1 | -0.0566                   | 1.7465  | -1.2600 | 0.1134  | 0.1252  | 0.0353  | 0.1280   | 0.0886  | 0.1273  | 0.2121  | 0.0119  | 0.0839  |

Dipole mement (in D) 1.94 (DEN) 2.17 0.74 1.35 1.55 1.87 1.97 3.60 4.64 1.89

-----  
File TZVPMol237.out

Molecule PMol237 1,2-difluoroethene

SP Mol237 B3LYP/Def2TZVP VAC.

0 6

Dipole 0.0000 0.0000 2.2792 2.2792

Quadrupole -1.0059 -0.6272 1.6330 0.0000 0.0000 0.0000

|   | Atomic coordinates (in A) |        |        | Mul.   | Lowdin  | Hirsch. | I-Hirsch | CM5    | ESP     | NPA    | AIM    | ACP    |
|---|---------------------------|--------|--------|--------|---------|---------|----------|--------|---------|--------|--------|--------|
| 6 | 0.0000                    | 0.6609 | 0.5716 | 0.0762 | -0.3124 | 0.0383  | 0.0412   | 0.0063 | -0.0385 | 0.1301 | 0.5663 | 0.0572 |

|   |        |         |         |         |         |         |         |         |         |         |         |         |
|---|--------|---------|---------|---------|---------|---------|---------|---------|---------|---------|---------|---------|
| 6 | 0.0000 | -0.6609 | 0.5716  | 0.0762  | -0.3124 | 0.0383  | 0.0412  | 0.0063  | -0.0385 | 0.1301  | 0.5665  | 0.0572  |
| 1 | 0.0000 | -1.2375 | 1.4847  | 0.1145  | 0.1305  | 0.0597  | 0.0977  | 0.1171  | 0.1352  | 0.1722  | 0.0876  | 0.1038  |
| 1 | 0.0000 | 1.2375  | 1.4847  | 0.1145  | 0.1305  | 0.0597  | 0.0977  | 0.1171  | 0.1352  | 0.1722  | 0.0876  | 0.1038  |
| 9 | 0.0000 | 1.3815  | -0.5461 | -0.1906 | 0.1818  | -0.0981 | -0.1389 | -0.1234 | -0.0967 | -0.3024 | -0.6539 | -0.1610 |
| 9 | 0.0000 | -1.3815 | -0.5461 | -0.1906 | 0.1818  | -0.0981 | -0.1389 | -0.1234 | -0.0967 | -0.3024 | -0.6539 | -0.1610 |

Dipole mement (in D) 2.28 (DEN) 3.05 0.81 1.58 2.35 2.35 2.22 4.76 7.79 2.64

-----  
File TZVPMol238.out

Molecule PMol238 3-fluoropropene(eclipsed)

SP Mol238 B3LYP/Def2TZVP VAC.

0 9

Dipole -0.8988 1.4714 0.0000 1.7242  
 Quadropole 2.6849 -1.4284 -1.2565 -0.3354 0.0000 0.0000

|   | Atomic coordinates (in A) |         |         | Mul.    | Lowdin  | Hirsch. | I-Hirsch | CM5     | ESP     | NPA     | AIM     | ACP     |
|---|---------------------------|---------|---------|---------|---------|---------|----------|---------|---------|---------|---------|---------|
| 6 | 1.3201                    | 0.8496  | 0.0000  | -0.2553 | -0.2016 | -0.0843 | -0.2745  | -0.1858 | -0.4491 | -0.3788 | -0.0532 | -0.1917 |
| 1 | 1.8138                    | -0.1127 | 0.0000  | 0.1304  | 0.1255  | 0.0377  | 0.1183   | 0.0927  | 0.1960  | 0.2031  | 0.0561  | 0.0760  |
| 1 | 1.9484                    | 1.7288  | 0.0000  | 0.1161  | 0.1218  | 0.0390  | 0.1149   | 0.0920  | 0.1769  | 0.1965  | 0.0346  | 0.0880  |
| 6 | 0.0000                    | 0.9448  | 0.0000  | -0.1292 | -0.2178 | -0.0416 | -0.1120  | -0.1035 | -0.0642 | -0.2286 | -0.0485 | -0.0734 |
| 1 | -0.4847                   | 1.9165  | 0.0000  | 0.1070  | 0.1432  | 0.0433  | 0.1014   | 0.0990  | 0.0897  | 0.1997  | 0.0295  | 0.0894  |
| 6 | -0.9356                   | -0.2053 | 0.0000  | 0.0865  | -0.3128 | 0.0575  | 0.1153   | -0.0239 | 0.2522  | 0.0245  | 0.5693  | 0.0244  |
| 1 | -1.5875                   | -0.1817 | 0.8805  | 0.0979  | 0.1257  | 0.0427  | 0.0659   | 0.0983  | 0.0245  | 0.1671  | 0.0343  | 0.0875  |
| 1 | -1.5875                   | -0.1817 | -0.8805 | 0.0979  | 0.1257  | 0.0427  | 0.0659   | 0.0983  | 0.0245  | 0.1671  | 0.0343  | 0.0875  |
| 9 | -0.2677                   | -1.4116 | 0.0000  | -0.2513 | 0.0905  | -0.1369 | -0.1949  | -0.1670 | -0.2506 | -0.3506 | -0.6567 | -0.1878 |

Dipole mement (in D) 1.72 (DEN) 2.08 0.07 1.18 1.72 1.66 1.71 3.19 4.33 1.88

-----  
File TZVPMol239.out

Molecule PMol239 3-fluoropropene(gauche)

SP Mol239 B3LYP/Def2TZVP VAC.

0 9

Dipole 1.4963 0.7376 0.8233 1.8603  
 Quadropole -1.3942 1.8406 -0.4464 -1.1467 -1.8328 -0.9845

|   | Atomic coordinates (in A) |         |         | Mul.    | Lowdin  | Hirsch. | I-Hirsch | CM5     | ESP     | NPA     | AIM     | ACP     |
|---|---------------------------|---------|---------|---------|---------|---------|----------|---------|---------|---------|---------|---------|
| 6 | -0.6005                   | 0.4348  | 0.3026  | 0.0771  | -0.3064 | 0.0534  | 0.1142   | -0.0288 | 0.2175  | 0.0190  | 0.5625  | 0.0172  |
| 1 | -0.9137                   | 0.6054  | 1.3376  | 0.0900  | 0.1226  | 0.0405  | 0.0632   | 0.0962  | 0.0261  | 0.1651  | 0.0318  | 0.0849  |
| 1 | -0.4715                   | 1.4065  | -0.1804 | 0.0858  | 0.1222  | 0.0406  | 0.0669   | 0.0972  | 0.0531  | 0.1589  | 0.0299  | 0.0851  |
| 6 | 0.6405                    | -0.3748 | 0.2393  | -0.0937 | -0.2056 | -0.0355 | -0.1038  | -0.0971 | -0.1058 | -0.2155 | -0.0234 | -0.0690 |
| 1 | 0.5575                    | -1.3923 | 0.6086  | 0.1137  | 0.1418  | 0.0448  | 0.1052   | 0.1012  | 0.1370  | 0.2015  | 0.0405  | 0.0859  |
| 6 | 1.7989                    | 0.0853  | -0.2081 | -0.2521 | -0.1898 | -0.0707 | -0.2523  | -0.1732 | -0.4335 | -0.3590 | -0.0618 | -0.1768 |
| 1 | 2.6954                    | -0.5197 | -0.2074 | 0.1192  | 0.1229  | 0.0429  | 0.1171   | 0.0957  | 0.1829  | 0.1982  | 0.0403  | 0.0924  |
| 1 | 1.8985                    | 1.0957  | -0.5881 | 0.1135  | 0.1221  | 0.0394  | 0.1094   | 0.0927  | 0.1828  | 0.1871  | 0.0317  | 0.0876  |
| 9 | -1.6444                   | -0.2297 | -0.3304 | -0.2534 | 0.0701  | -0.1556 | -0.2200  | -0.1840 | -0.2600 | -0.3554 | -0.6514 | -0.2074 |

Dipole mement (in D) 1.86 (DEN) 2.12 0.36 1.35 1.73 1.82 1.92 3.39 4.62 1.90

-----  
 File TZVPMol240.out  
 Molecule PMol240 1,1-difluoro-1-propene  
 SP Mol240 B3LYP/Def2TZVP VAC.  
 0 9

|                      |                           |         |         |         |         |         |          |         |         |         |         |         |
|----------------------|---------------------------|---------|---------|---------|---------|---------|----------|---------|---------|---------|---------|---------|
| Dipole               | -1.5176                   | -0.5269 | 0.0000  | 1.6065  |         |         |          |         |         |         |         |         |
| Quadrupole           | 0.1263                    | 0.0798  | -0.2061 | 0.4978  | 0.0000  | 0.0000  |          |         |         |         |         |         |
|                      | Atomic coordinates (in A) |         |         | Mul.    | Lowdin  | Hirsch. | I-Hirsch | CM5     | ESP     | NPA     | AIM     | ACP     |
| 6                    | 0.4839                    | -0.0590 | 0.0000  | 0.3891  | -0.4715 | 0.1730  | 0.6006   | 0.2063  | 0.3791  | 0.7167  | 1.0816  | 0.3309  |
| 6                    | -0.6855                   | -0.6675 | 0.0000  | -0.2159 | -0.2168 | -0.0784 | -0.3839  | -0.1348 | -0.3334 | -0.3657 | 0.0813  | -0.1199 |
| 1                    | -0.6517                   | -1.7473 | 0.0000  | 0.1256  | 0.1519  | 0.0473  | 0.1403   | 0.1052  | 0.1596  | 0.2201  | 0.0566  | 0.0874  |
| 6                    | -1.9950                   | 0.0343  | 0.0000  | -0.3059 | -0.2856 | -0.0790 | -0.3147  | -0.2249 | -0.0448 | -0.6170 | 0.0390  | -0.2435 |
| 1                    | -2.5896                   | -0.2322 | -0.8746 | 0.1184  | 0.1266  | 0.0376  | 0.1197   | 0.0892  | 0.0515  | 0.2125  | 0.0154  | 0.0884  |
| 1                    | -2.5896                   | -0.2322 | 0.8746  | 0.1184  | 0.1266  | 0.0376  | 0.1197   | 0.0892  | 0.0515  | 0.2125  | 0.0154  | 0.0884  |
| 1                    | -1.8735                   | 1.1145  | -0.0000 | 0.1253  | 0.1286  | 0.0372  | 0.1183   | 0.0912  | 0.0409  | 0.2193  | 0.0271  | 0.0796  |
| 9                    | 1.6546                    | -0.6643 | 0.0000  | -0.1765 | 0.2201  | -0.0899 | -0.2054  | -0.1126 | -0.1745 | -0.2963 | -0.6584 | -0.1586 |
| 9                    | 0.6658                    | 1.2477  | -0.0000 | -0.1784 | 0.2201  | -0.0856 | -0.1947  | -0.1088 | -0.1299 | -0.3021 | -0.6587 | -0.1527 |
| Dipole mement (in D) | 1.61 (DEN)                |         | 1.99    | 0.53    | 1.04    | 1.11    | 1.63     | 1.62    | 2.74    | 6.86    | 1.59    |         |

-----  
 File TZVPMol241.out  
 Molecule PMol241 fluoroethene  
 SP Mol241 B3LYP/Def2TZVP VAC.  
 0 6

|                      |                           |         |         |         |         |         |          |         |         |         |         |         |
|----------------------|---------------------------|---------|---------|---------|---------|---------|----------|---------|---------|---------|---------|---------|
| Dipole               | 1.0999                    | 0.7951  | 0.0000  | 1.3572  |         |         |          |         |         |         |         |         |
| Quadrupole           | -0.1695                   | 1.8565  | -1.6870 | -0.7674 | 0.0000  | 0.0000  |          |         |         |         |         |         |
|                      | Atomic coordinates (in A) |         |         | Mul.    | Lowdin  | Hirsch. | I-Hirsch | CM5     | ESP     | NPA     | AIM     | ACP     |
| 6                    | 0.0000                    | 0.4295  | 0.0000  | 0.1258  | -0.3113 | 0.0630  | 0.2234   | 0.0251  | 0.1960  | 0.2308  | 0.5021  | 0.0913  |
| 6                    | 1.1819                    | -0.1513 | 0.0000  | -0.2782 | -0.2321 | -0.1051 | -0.4318  | -0.2052 | -0.5719 | -0.4955 | -0.0281 | -0.2114 |
| 1                    | 1.2916                    | -1.2256 | 0.0000  | 0.1290  | 0.1274  | 0.0492  | 0.1501   | 0.1031  | 0.2455  | 0.2109  | 0.0624  | 0.0923  |
| 9                    | -1.1416                   | -0.2669 | 0.0000  | -0.2029 | 0.1627  | -0.1093 | -0.1649  | -0.1357 | -0.1691 | -0.3202 | -0.6645 | -0.1675 |
| 1                    | -0.1787                   | 1.4978  | 0.0000  | 0.1039  | 0.1220  | 0.0547  | 0.0794   | 0.1115  | 0.1006  | 0.1624  | 0.0740  | 0.0983  |
| 1                    | 2.0698                    | 0.4605  | 0.0000  | 0.1225  | 0.1313  | 0.0476  | 0.1438   | 0.1012  | 0.1989  | 0.2115  | 0.0544  | 0.0970  |
| Dipole mement (in D) | 1.36 (DEN)                |         | 1.76    | 0.34    | 0.92    | 1.24    | 1.38     | 1.33    | 2.76    | 4.87    | 1.50    |         |

-----  
 File TZVPMol242.out  
 Molecule PMol242 2-fluoropropene  
 SP Mol242 B3LYP/Def2TZVP VAC.  
 0 9

|            |                           |         |         |         |         |         |          |         |         |         |         |         |
|------------|---------------------------|---------|---------|---------|---------|---------|----------|---------|---------|---------|---------|---------|
| Dipole     | 0.8127                    | -1.3486 | -0.0002 | 1.5745  |         |         |          |         |         |         |         |         |
| Quadrupole | 1.9718                    | -0.7882 | -1.1837 | 0.1749  | 0.0001  | 0.0001  |          |         |         |         |         |         |
|            | Atomic coordinates (in A) |         |         | Mul.    | Lowdin  | Hirsch. | I-Hirsch | CM5     | ESP     | NPA     | AIM     | ACP     |
| 6          | -0.0977                   | -0.0459 | -0.0000 | 0.2680  | -0.3517 | 0.0988  | 0.4644   | 0.0979  | 0.5218  | 0.4050  | 0.4769  | 0.2054  |
| 6          | -1.1686                   | -0.8210 | -0.0001 | -0.3294 | -0.2150 | -0.1201 | -0.5002  | -0.2181 | -0.7400 | -0.4973 | -0.0329 | -0.2326 |
| 1          | -1.0548                   | -1.8930 | -0.0003 | 0.1173  | 0.1291  | 0.0409  | 0.1462   | 0.0951  | 0.2432  | 0.2060  | 0.0431  | 0.0892  |



|   |         |         |         |         |         |         |         |         |         |         |         |         |
|---|---------|---------|---------|---------|---------|---------|---------|---------|---------|---------|---------|---------|
| 6 | 1.3281  | -0.4319 | -0.0001 | -0.3294 | -0.2603 | -0.0825 | -0.4929 | -0.2255 | -0.4582 | -0.6612 | 0.0342  | -0.2499 |
| 9 | -0.2515 | 1.2956  | 0.0002  | -0.2164 | 0.1714  | -0.1156 | -0.1853 | -0.1407 | -0.2291 | -0.3313 | -0.6660 | -0.1782 |
| 1 | -2.1639 | -0.4046 | -0.0001 | 0.1259  | 0.1278  | 0.0434  | 0.1493  | 0.0978  | 0.2503  | 0.2131  | 0.0561  | 0.0854  |
| 1 | 1.4387  | -1.5123 | -0.0003 | 0.1138  | 0.1332  | 0.0458  | 0.1431  | 0.0988  | 0.1318  | 0.2206  | 0.0258  | 0.0977  |
| 1 | 1.8364  | -0.0285 | -0.8761 | 0.1251  | 0.1328  | 0.0446  | 0.1377  | 0.0973  | 0.1402  | 0.2226  | 0.0313  | 0.0915  |
| 1 | 1.8364  | -0.0289 | 0.8762  | 0.1251  | 0.1328  | 0.0446  | 0.1377  | 0.0973  | 0.1402  | 0.2226  | 0.0313  | 0.0915  |

Dipole moment (in D) 1.57 (DEN) 1.87 0.79 1.13 1.24 1.59 1.59 2.94 4.97 1.63

-----  
File TZVPMol243.out

Molecule PMol243 cis-1-fluoro-1-propene

SP Mol243 B3LYP/Def2TZVP VAC.

0 9

Dipole -0.0771 1.4110 0.0000 1.4131  
 Quadrupole 2.3047 -0.9515 -1.3532 0.5543 0.0000 0.0000

|   | Atomic coordinates (in A) |         |         | Mul.    | Lowdin  | Hirsch. | I-Hirsch | CM5     | ESP     | NPA     | AIM     | ACP     |
|---|---------------------------|---------|---------|---------|---------|---------|----------|---------|---------|---------|---------|---------|
| 6 | 0.0000                    | 0.8698  | 0.0000  | -0.1486 | -0.2278 | -0.0562 | -0.1693  | -0.1175 | -0.1789 | -0.2742 | 0.0024  | -0.0903 |
| 6 | 0.9559                    | -0.0424 | 0.0000  | 0.0912  | -0.2894 | 0.0452  | 0.1455   | 0.0089  | -0.0822 | 0.2149  | 0.4756  | 0.0662  |
| 9 | 0.6919                    | -1.3601 | 0.0000  | -0.2160 | 0.1516  | -0.1131 | -0.1637  | -0.1399 | -0.1143 | -0.3297 | -0.6675 | -0.1681 |
| 6 | -1.4601                   | 0.6008  | 0.0000  | -0.3058 | -0.2882 | -0.0805 | -0.3477  | -0.2266 | 0.0916  | -0.6321 | 0.0266  | -0.2446 |
| 1 | 0.3401                    | 1.8979  | 0.0000  | 0.1127  | 0.1477  | 0.0422  | 0.1080   | 0.0986  | 0.1020  | 0.2078  | 0.0352  | 0.0880  |
| 1 | 2.0185                    | 0.1595  | 0.0000  | 0.1049  | 0.1229  | 0.0501  | 0.0750   | 0.1071  | 0.1476  | 0.1642  | 0.0693  | 0.0933  |
| 1 | -1.6723                   | -0.4653 | 0.0000  | 0.1291  | 0.1283  | 0.0371  | 0.1190   | 0.0911  | 0.0203  | 0.2205  | 0.0300  | 0.0792  |
| 1 | -1.9440                   | 1.0400  | 0.8736  | 0.1163  | 0.1274  | 0.0375  | 0.1165   | 0.0891  | 0.0069  | 0.2144  | 0.0142  | 0.0881  |
| 1 | -1.9440                   | 1.0400  | -0.8736 | 0.1163  | 0.1274  | 0.0375  | 0.1165   | 0.0891  | 0.0069  | 0.2144  | 0.0142  | 0.0881  |

Dipole moment (in D) 1.41 (DEN) 1.88 0.83 0.98 1.31 1.43 1.35 2.85 4.80 1.59

-----  
File TZVPMol244.out

Molecule PMol244 1,1-difluoroethene

SP Mol244 B3LYP/Def2TZVP VAC.

0 6

Dipole 0.0000 0.0000 1.1895 1.1895  
 Quadrupole -0.8146 -0.3249 1.1395 0.0000 0.0000 0.0000

|   | Atomic coordinates (in A) |         |         | Mul.    | Lowdin  | Hirsch. | I-Hirsch | CM5     | ESP     | NPA     | AIM     | ACP     |
|---|---------------------------|---------|---------|---------|---------|---------|----------|---------|---------|---------|---------|---------|
| 6 | 0.0000                    | 0.0000  | 0.0655  | 0.4042  | -0.5017 | 0.1875  | 0.6750   | 0.2190  | 0.5436  | 0.7314  | 1.1057  | 0.3534  |
| 6 | 0.0000                    | 0.0000  | 1.3808  | -0.3449 | -0.2288 | -0.1291 | -0.6337  | -0.2249 | -0.7347 | -0.5928 | 0.0534  | -0.2431 |
| 1 | 0.0000                    | 0.9340  | 1.9142  | 0.1381  | 0.1362  | 0.0532  | 0.1769   | 0.1081  | 0.2617  | 0.2247  | 0.0768  | 0.0973  |
| 9 | 0.0000                    | 1.0723  | -0.6948 | -0.1677 | 0.2290  | -0.0823 | -0.1975  | -0.1052 | -0.1662 | -0.2940 | -0.6562 | -0.1525 |
| 9 | 0.0000                    | -1.0723 | -0.6948 | -0.1677 | 0.2290  | -0.0823 | -0.1975  | -0.1052 | -0.1662 | -0.2940 | -0.6562 | -0.1525 |
| 1 | 0.0000                    | -0.9340 | 1.9142  | 0.1381  | 0.1362  | 0.0532  | 0.1769   | 0.1081  | 0.2617  | 0.2247  | 0.0768  | 0.0973  |

Dipole moment (in D) 1.19 (DEN) 1.50 0.70 0.73 0.58 1.27 1.22 2.39 6.49 1.31

-----  
File TZVPMol245.out

Molecule PMol245 1,1-difluoroallene

SP Mol245 B3LYP/Def2TZVP VAC.

0 7

Dipole 0.0000 0.0000 1.9406 1.9406

Quadrupole 0.2410 -3.0118 2.7708 0.0000 0.0000 0.0000

|   | Atomic coordinates (in A) |         |         | Mul.    | Lowdin  | Hirsch. | I-Hirsch | CM5     | ESP     | NPA     | AIM     | ACP     |
|---|---------------------------|---------|---------|---------|---------|---------|----------|---------|---------|---------|---------|---------|
| 6 | 0.0000                    | 0.0000  | 0.8747  | -0.0847 | -0.1070 | -0.0623 | -0.2496  | -0.0671 | -0.1486 | -0.1486 | -0.1318 | -0.0602 |
| 6 | 0.0000                    | 0.0000  | 2.1719  | -0.2150 | -0.1478 | -0.0423 | -0.1796  | -0.1385 | -0.2689 | -0.3527 | 0.0719  | -0.1447 |
| 6 | 0.0000                    | 0.0000  | -0.4204 | 0.3492  | -0.4670 | 0.1661  | 0.5564   | 0.2051  | 0.3856  | 0.6624  | 1.2045  | 0.3168  |
| 1 | -0.9215                   | 0.0000  | 2.7469  | 0.1422  | 0.1366  | 0.0569  | 0.1350   | 0.1095  | 0.1684  | 0.2085  | 0.0709  | 0.1022  |
| 1 | 0.9215                    | 0.0000  | 2.7469  | 0.1422  | 0.1366  | 0.0569  | 0.1350   | 0.1095  | 0.1691  | 0.2085  | 0.0709  | 0.1022  |
| 9 | 0.0000                    | 1.0799  | -1.1806 | -0.1670 | 0.2243  | -0.0877 | -0.1986  | -0.1092 | -0.1528 | -0.2890 | -0.6431 | -0.1582 |
| 9 | 0.0000                    | -1.0799 | -1.1806 | -0.1670 | 0.2243  | -0.0877 | -0.1986  | -0.1092 | -0.1528 | -0.2890 | -0.6431 | -0.1582 |

Dipole moment (in D) 1.94 (DEN) 2.34 0.01 1.46 1.77 1.99 1.98 3.14 6.93 2.09

-----  
File TZVPMol246.out

Molecule PMol246 trifluoroethene

SP Mol246 B3LYP/Def2TZVP VAC.

0 6

Dipole -1.2290 0.1818 0.0000 1.2424

Quadrupole 1.9297 -2.5188 0.5891 1.1632 0.0000 0.0000

|   | Atomic coordinates (in A) |         |        | Mul.    | Lowdin  | Hirsch. | I-Hirsch | CM5     | ESP     | NPA     | AIM     | ACP     |
|---|---------------------------|---------|--------|---------|---------|---------|----------|---------|---------|---------|---------|---------|
| 6 | 0.0000                    | 0.4311  | 0.0000 | 0.3763  | -0.4937 | 0.1678  | 0.5107   | 0.2060  | 0.3416  | 0.6361  | 1.1924  | 0.3240  |
| 6 | -0.7013                   | -0.6895 | 0.0000 | 0.0059  | -0.3015 | 0.0168  | -0.1714  | -0.0102 | -0.1908 | 0.0388  | 0.6436  | 0.0276  |
| 9 | -0.0891                   | -1.8741 | 0.0000 | -0.1913 | 0.1783  | -0.1001 | -0.1115  | -0.1250 | -0.0949 | -0.2958 | -0.6481 | -0.1626 |
| 9 | 1.3064                    | 0.5025  | 0.0000 | -0.1548 | 0.2474  | -0.0718 | -0.1763  | -0.0939 | -0.1013 | -0.2790 | -0.6454 | -0.1456 |
| 9 | -0.5522                   | 1.6223  | 0.0000 | -0.1664 | 0.2358  | -0.0769 | -0.1850  | -0.0997 | -0.1483 | -0.2833 | -0.6494 | -0.1471 |
| 1 | -1.7783                   | -0.7058 | 0.0000 | 0.1302  | 0.1337  | 0.0643  | 0.1335   | 0.1228  | 0.1937  | 0.1832  | 0.1073  | 0.1038  |

Dipole moment (in D) 1.24 (DEN) 1.62 0.81 0.83 1.17 1.30 1.22 2.59 5.20 1.45

-----  
File TZVPMol247.out

Molecule PMol247 3,3,3-trifluoropropene

SP Mol247 B3LYP/Def2TZVP VAC.

0 9

Dipole 0.3662 -2.4031 0.0000 2.4308

Quadrupole 0.7082 2.3135 -3.0217 -0.2612 0.0000 0.0000

|   | Atomic coordinates (in A) |         |        | Mul.    | Lowdin  | Hirsch. | I-Hirsch | CM5     | ESP     | NPA     | AIM     | ACP     |
|---|---------------------------|---------|--------|---------|---------|---------|----------|---------|---------|---------|---------|---------|
| 6 | 0.5228                    | -1.0503 | 0.0000 | -0.1847 | -0.1704 | -0.0526 | -0.3775  | -0.1045 | -0.2462 | -0.2908 | -0.0036 | -0.0974 |
| 6 | -0.2995                   | -2.0835 | 0.0000 | -0.2207 | -0.1483 | -0.0478 | -0.1754  | -0.1485 | -0.2811 | -0.3195 | -0.0242 | -0.1576 |
| 1 | -1.3731                   | -1.9529 | 0.0000 | 0.1432  | 0.1319  | 0.0491  | 0.1281   | 0.1044  | 0.1675  | 0.2084  | 0.0716  | 0.0879  |
| 6 | 0.0628                    | 0.3655  | 0.0000 | 0.5362  | -0.6798 | 0.2742  | 0.9939   | 0.3258  | 0.6582  | 0.9283  | 1.7648  | 0.5199  |
| 1 | 1.5997                    | -1.1619 | 0.0000 | 0.1331  | 0.1523  | 0.0559  | 0.1485   | 0.1137  | 0.1723  | 0.2191  | 0.0684  | 0.0935  |
| 1 | 0.0748                    | -3.0972 | 0.0000 | 0.1321  | 0.1292  | 0.0537  | 0.1332   | 0.1068  | 0.1683  | 0.2034  | 0.0567  | 0.1043  |
| 9 | -1.2698                   | 0.4844  | 0.0000 | -0.1814 | 0.2035  | -0.1014 | -0.2742  | -0.1242 | -0.1968 | -0.3158 | -0.6492 | -0.1725 |

|   |        |        |         |         |        |         |         |         |         |         |         |         |
|---|--------|--------|---------|---------|--------|---------|---------|---------|---------|---------|---------|---------|
| 9 | 0.5228 | 1.0257 | 1.0776  | -0.1789 | 0.1908 | -0.1155 | -0.2884 | -0.1368 | -0.2210 | -0.3166 | -0.6423 | -0.1891 |
| 9 | 0.5228 | 1.0257 | -1.0776 | -0.1789 | 0.1908 | -0.1155 | -0.2884 | -0.1368 | -0.2210 | -0.3166 | -0.6423 | -0.1891 |

Dipole mement (in D) 2.43 (DEN) 2.18 0.62 1.73 2.09 2.28 2.49 3.83 6.52 2.22

-----  
File TZVPMol248.out

Molecule PMol248 fluoroallene

SP Mol248 B3LYP/Def2TZVP VAC.

0 7

Dipole -0.5548 1.6560 0.0000 1.7465

Quadrupole 0.6761 -0.1388 -0.5373 2.5885 0.0000 0.0000

|   | Atomic coordinates (in A) |         |         | Mul.    | Lowdin  | Hirsch. | I-Hirsch | CM5     | ESP     | NPA     | AIM     | ACP     |
|---|---------------------------|---------|---------|---------|---------|---------|----------|---------|---------|---------|---------|---------|
| 6 | 0.0000                    | 0.6221  | 0.0000  | 0.0093  | -0.1133 | -0.0335 | -0.0091  | -0.0439 | 0.0548  | -0.0438 | -0.2335 | -0.0195 |
| 6 | 0.5686                    | 1.7881  | 0.0000  | -0.2392 | -0.1664 | -0.0607 | -0.2799  | -0.1575 | -0.3900 | -0.3971 | 0.0513  | -0.1639 |
| 6 | -0.6157                   | -0.5217 | 0.0000  | 0.0363  | -0.2804 | 0.0405  | 0.0870   | 0.0098  | -0.0664 | 0.1475  | 0.5999  | 0.0575  |
| 1 | 0.8219                    | 2.3003  | 0.9222  | 0.1378  | 0.1364  | 0.0551  | 0.1376   | 0.1078  | 0.1888  | 0.2132  | 0.0692  | 0.1005  |
| 1 | 0.8219                    | 2.3003  | -0.9222 | 0.1378  | 0.1364  | 0.0551  | 0.1376   | 0.1078  | 0.1888  | 0.2132  | 0.0692  | 0.1005  |
| 1 | -1.6915                   | -0.6377 | 0.0000  | 0.1189  | 0.1323  | 0.0587  | 0.0941   | 0.1159  | 0.1464  | 0.1804  | 0.0927  | 0.0984  |
| 9 | 0.0367                    | -1.6993 | 0.0000  | -0.2009 | 0.1550  | -0.1152 | -0.1673  | -0.1399 | -0.1223 | -0.3135 | -0.6491 | -0.1736 |

Dipole mement (in D) 1.75 (DEN) 2.30 0.49 1.30 1.64 1.76 1.80 3.12 5.17 1.85

-----  
File TZVPMol249.out

Molecule PMol249 fluorobenzene

SP Mol249 B3LYP/Def2TZVP VAC.

0 12

Dipole 0.0000 0.0000 -1.4796 1.4796

Quadrupole -3.6565 4.7543 -1.0978 0.0000 0.0000

|   | Atomic coordinates (in A) |         |         | Mul.    | Lowdin  | Hirsch. | I-Hirsch | CM5     | ESP     | NPA     | AIM     | ACP     |
|---|---------------------------|---------|---------|---------|---------|---------|----------|---------|---------|---------|---------|---------|
| 6 | 0.0000                    | 0.0000  | 0.9257  | 0.3141  | -0.2645 | 0.0942  | 0.3851   | 0.1053  | 0.4060  | 0.3805  | 0.5143  | 0.1836  |
| 6 | 0.0000                    | 1.2112  | 0.2595  | -0.1906 | -0.1202 | -0.0521 | -0.2727  | -0.1034 | -0.2757 | -0.2751 | -0.0063 | -0.1023 |
| 6 | 0.0000                    | -1.2112 | 0.2595  | -0.1906 | -0.1202 | -0.0521 | -0.2727  | -0.1034 | -0.2757 | -0.2751 | -0.0064 | -0.1023 |
| 6 | 0.0000                    | 1.2016  | -1.1284 | -0.0956 | -0.1320 | -0.0325 | -0.0425  | -0.0882 | -0.0748 | -0.1868 | -0.0160 | -0.0766 |
| 6 | 0.0000                    | -1.2016 | -1.1284 | -0.0956 | -0.1320 | -0.0325 | -0.0425  | -0.0882 | -0.0748 | -0.1868 | -0.0161 | -0.0766 |
| 6 | 0.0000                    | 0.0000  | -1.8244 | -0.1205 | -0.1484 | -0.0463 | -0.1212  | -0.1023 | -0.1743 | -0.2259 | -0.0228 | -0.0917 |
| 1 | 0.0000                    | 2.1325  | 0.8255  | 0.1208  | 0.1496  | 0.0500  | 0.1283   | 0.1072  | 0.1618  | 0.2241  | 0.0568  | 0.0879  |
| 1 | 0.0000                    | -2.1325 | 0.8255  | 0.1208  | 0.1496  | 0.0500  | 0.1283   | 0.1072  | 0.1618  | 0.2241  | 0.0568  | 0.0879  |
| 1 | 0.0000                    | 2.1406  | -1.6666 | 0.1174  | 0.1447  | 0.0448  | 0.1006   | 0.1010  | 0.1238  | 0.2112  | 0.0369  | 0.0892  |
| 1 | 0.0000                    | -2.1406 | -1.6666 | 0.1174  | 0.1447  | 0.0448  | 0.1006   | 0.1010  | 0.1238  | 0.2112  | 0.0369  | 0.0892  |
| 1 | 0.0000                    | 0.0000  | -2.9061 | 0.1131  | 0.1430  | 0.0418  | 0.0971   | 0.0979  | 0.1277  | 0.2112  | 0.0330  | 0.0861  |
| 9 | 0.0000                    | 0.0000  | 2.2676  | -0.2106 | 0.1860  | -0.1099 | -0.1884  | -0.1342 | -0.2295 | -0.3125 | -0.6676 | -0.1744 |

Dipole mement (in D) 1.48 (DEN) 1.78 0.16 1.06 1.44 1.53 1.52 2.95 5.23 1.64

-----  
File TZVPMol250.out

Molecule PMol250 (trifluoromethyl)benzene

SP Mol250 B3LYP/Def2TZVP VAC.

0 15

Dipole 0.1055 2.8481 0.0000 2.8501

Quadrupole -4.8023 0.8824 3.9199 -0.0982 0.0000 0.0000

|   | Atomic coordinates (in A) |         |         | Mul.    | Lowdin  | Hirsch. | I-Hirsch | CM5     | ESP     | NPA     | AIM     | ACP     |
|---|---------------------------|---------|---------|---------|---------|---------|----------|---------|---------|---------|---------|---------|
| 6 | 0.0311                    | 0.7414  | 1.2056  | -0.1835 | -0.0907 | -0.0308 | -0.0657  | -0.0827 | -0.1114 | -0.1765 | -0.0103 | -0.0834 |
| 6 | 0.0311                    | 2.1277  | 1.2026  | -0.0899 | -0.1280 | -0.0309 | -0.0826  | -0.0868 | -0.1127 | -0.2007 | -0.0152 | -0.0766 |
| 6 | 0.0309                    | 2.8212  | 0.0000  | -0.1116 | -0.1248 | -0.0274 | -0.0733  | -0.0834 | -0.0864 | -0.1887 | -0.0196 | -0.0724 |
| 6 | 0.0311                    | 2.1277  | -1.2026 | -0.0899 | -0.1280 | -0.0309 | -0.0826  | -0.0868 | -0.1127 | -0.2007 | -0.0156 | -0.0766 |
| 6 | 0.0311                    | 0.7414  | -1.2056 | -0.1835 | -0.0907 | -0.0308 | -0.0657  | -0.0827 | -0.1114 | -0.1765 | -0.0102 | -0.0834 |
| 6 | 0.0335                    | 0.0508  | 0.0000  | 0.0631  | -0.1298 | -0.0271 | -0.2572  | -0.0300 | -0.0219 | -0.1489 | 0.0106  | -0.0100 |
| 1 | 0.0364                    | 0.1935  | 2.1384  | 0.1338  | 0.1532  | 0.0458  | 0.1063   | 0.1046  | 0.1243  | 0.2249  | 0.0598  | 0.0784  |
| 1 | 0.0338                    | 2.6670  | 2.1407  | 0.1188  | 0.1460  | 0.0468  | 0.1004   | 0.1029  | 0.1197  | 0.2137  | 0.0401  | 0.0917  |
| 1 | 0.0331                    | 3.9036  | 0.0000  | 0.1187  | 0.1455  | 0.0466  | 0.0990   | 0.1027  | 0.1129  | 0.2123  | 0.0391  | 0.0915  |
| 1 | 0.0338                    | 2.6670  | -2.1407 | 0.1188  | 0.1460  | 0.0468  | 0.1004   | 0.1029  | 0.1197  | 0.2137  | 0.0401  | 0.0917  |
| 1 | 0.0364                    | 0.1935  | -2.1384 | 0.1338  | 0.1532  | 0.0458  | 0.1063   | 0.1046  | 0.1243  | 0.2249  | 0.0598  | 0.0784  |
| 6 | -0.0179                   | -1.4455 | 0.0000  | 0.5172  | -0.6397 | 0.2765  | 0.9788   | 0.3305  | 0.5579  | 0.9540  | 1.7580  | 0.5196  |
| 9 | 0.5767                    | -1.9738 | -1.0802 | -0.1828 | 0.1996  | -0.1058 | -0.2843  | -0.1282 | -0.1992 | -0.3166 | -0.6478 | -0.1773 |
| 9 | 0.5767                    | -1.9738 | 1.0802  | -0.1828 | 0.1996  | -0.1058 | -0.2843  | -0.1282 | -0.1992 | -0.3166 | -0.6478 | -0.1773 |
| 9 | -1.2866                   | -1.8984 | 0.0000  | -0.1802 | 0.1889  | -0.1186 | -0.2953  | -0.1394 | -0.2038 | -0.3184 | -0.6419 | -0.1945 |

Dipole moment (in D) 2.85 (DEN) 2.40 0.70 2.10 2.71 2.67 2.91 4.21 7.16 2.60

-----  
File TZVPMol251.out

Molecule PMol251 ortho-fluorotoluene

SP Mol251 B3LYP/Def2TZVP VAC.

0 15

Dipole -0.6573 -1.0019 0.0000 1.1983

Quadrupole 1.9880 1.5445 -3.5325 -2.9032 0.0000 0.0000

|   | Atomic coordinates (in A) |         |         | Mul.    | Lowdin  | Hirsch. | I-Hirsch | CM5     | ESP     | NPA     | AIM     | ACP     |
|---|---------------------------|---------|---------|---------|---------|---------|----------|---------|---------|---------|---------|---------|
| 6 | 0.6210                    | -0.6058 | -0.0000 | 0.0261  | -0.1547 | -0.0060 | 0.0268   | -0.0189 | 0.1622  | -0.0834 | 0.0152  | 0.0221  |
| 6 | 0.3656                    | 0.7604  | 0.0000  | 0.2893  | -0.2335 | 0.0893  | 0.3289   | 0.1023  | 0.2960  | 0.3803  | 0.4944  | 0.1745  |
| 6 | -0.4907                   | -1.4441 | -0.0000 | -0.1470 | -0.1114 | -0.0397 | -0.1092  | -0.0934 | -0.2394 | -0.1865 | -0.0241 | -0.0896 |
| 6 | -0.9059                   | 1.2966  | 0.0000  | -0.2080 | -0.1211 | -0.0540 | -0.2699  | -0.1051 | -0.2857 | -0.2681 | -0.0058 | -0.1037 |
| 6 | -1.7842                   | -0.9391 | -0.0000 | -0.1217 | -0.1479 | -0.0481 | -0.1182  | -0.1041 | -0.1724 | -0.2183 | -0.0244 | -0.0930 |
| 6 | -1.9922                   | 0.4322  | -0.0000 | -0.0948 | -0.1387 | -0.0390 | -0.0613  | -0.0947 | -0.1311 | -0.1978 | -0.0177 | -0.0832 |
| 9 | 1.4190                    | 1.5986  | 0.0000  | -0.2152 | 0.1849  | -0.1069 | -0.1778  | -0.1318 | -0.2119 | -0.3186 | -0.6679 | -0.1702 |
| 1 | -0.3293                   | -2.5159 | -0.0000 | 0.1092  | 0.1454  | 0.0400  | 0.0988   | 0.0969  | 0.1598  | 0.2058  | 0.0278  | 0.0832  |
| 1 | -1.0296                   | 2.3708  | 0.0000  | 0.1167  | 0.1494  | 0.0487  | 0.1266   | 0.1060  | 0.1768  | 0.2231  | 0.0546  | 0.0863  |
| 1 | -2.6274                   | -1.6170 | -0.0000 | 0.1093  | 0.1427  | 0.0407  | 0.0973   | 0.0968  | 0.1446  | 0.2102  | 0.0310  | 0.0847  |
| 1 | -2.9968                   | 0.8342  | -0.0000 | 0.1140  | 0.1435  | 0.0431  | 0.1004   | 0.0992  | 0.1448  | 0.2107  | 0.0346  | 0.0872  |
| 6 | 2.0226                    | -1.1189 | 0.0000  | -0.3399 | -0.2474 | -0.0818 | -0.4000  | -0.2256 | -0.4127 | -0.6085 | 0.0258  | -0.2517 |
| 1 | 2.5767                    | -0.7705 | 0.8719  | 0.1246  | 0.1314  | 0.0385  | 0.1205   | 0.0914  | 0.1270  | 0.2206  | 0.0239  | 0.0827  |
| 1 | 2.0419                    | -2.2061 | -0.0000 | 0.1128  | 0.1260  | 0.0367  | 0.1165   | 0.0896  | 0.1149  | 0.2101  | 0.0091  | 0.0883  |
| 1 | 2.5767                    | -0.7705 | -0.8719 | 0.1246  | 0.1314  | 0.0385  | 0.1205   | 0.0914  | 0.1270  | 0.2206  | 0.0239  | 0.0827  |

Dipole mement (in D) 1.20 (DEN) 1.39 1.03 0.81 1.12 1.25 1.23 2.71 4.84 1.40

-----  
File TZVPMol252.out

Molecule PMol252 meta-fluorotoluene

SP Mol252 B3LYP/Def2TZVP VAC.

0 15

Dipole -1.5930 0.6340 0.0000 1.7145

Quadrupole 0.2379 2.9345 -3.1724 3.2270 0.0000 0.0000

|   | Atomic coordinates (in A) |         |         | Mul.    | Lowdin  | Hirsch. | I-Hirsch | CM5     | ESP     | NPA     | AIM     | ACP     |
|---|---------------------------|---------|---------|---------|---------|---------|----------|---------|---------|---------|---------|---------|
| 6 | -1.1944                   | -0.1973 | -0.0000 | 0.1819  | -0.1633 | 0.0132  | 0.2052   | -0.0043 | 0.3966  | 0.0019  | 0.0048  | 0.0458  |
| 6 | -0.0429                   | -0.9846 | -0.0000 | -0.2745 | -0.0954 | -0.0585 | -0.3356  | -0.1075 | -0.4888 | -0.2767 | -0.0140 | -0.1144 |
| 6 | -1.0540                   | 1.1884  | -0.0000 | -0.1932 | -0.1272 | -0.0525 | -0.1776  | -0.1064 | -0.3724 | -0.2261 | -0.0289 | -0.1038 |
| 6 | 1.1957                    | -0.3764 | 0.0000  | 0.3471  | -0.2636 | 0.0928  | 0.3957   | 0.1039  | 0.4989  | 0.3896  | 0.5124  | 0.1824  |
| 6 | 0.2035                    | 1.7775  | 0.0000  | -0.0810 | -0.1315 | -0.0342 | -0.0315  | -0.0898 | -0.0251 | -0.1790 | -0.0174 | -0.0780 |
| 6 | 1.3497                    | 0.9979  | 0.0000  | -0.2175 | -0.1262 | -0.0581 | -0.2851  | -0.1093 | -0.3949 | -0.2851 | -0.0083 | -0.1082 |
| 1 | -0.1028                   | -2.0657 | -0.0000 | 0.1122  | 0.1516  | 0.0468  | 0.1345   | 0.1048  | 0.2008  | 0.2172  | 0.0489  | 0.0837  |
| 1 | -1.9406                   | 1.8105  | -0.0000 | 0.1042  | 0.1438  | 0.0373  | 0.1005   | 0.0942  | 0.1689  | 0.2062  | 0.0244  | 0.0805  |
| 9 | 2.2931                    | -1.1497 | 0.0000  | -0.2123 | 0.1846  | -0.1113 | -0.1880  | -0.1355 | -0.2348 | -0.3140 | -0.6684 | -0.1755 |
| 1 | 0.2932                    | 2.8562  | -0.0000 | 0.1146  | 0.1445  | 0.0438  | 0.1002   | 0.1000  | 0.1329  | 0.2105  | 0.0351  | 0.0880  |
| 1 | 2.3404                    | 1.4300  | 0.0000  | 0.1184  | 0.1485  | 0.0485  | 0.1279   | 0.1058  | 0.1908  | 0.2238  | 0.0549  | 0.0863  |
| 6 | -2.5444                   | -0.8423 | 0.0000  | -0.3597 | -0.2499 | -0.0801 | -0.4051  | -0.2253 | -0.4241 | -0.6115 | 0.0171  | -0.2488 |
| 1 | -2.6822                   | -1.4795 | 0.8742  | 0.1227  | 0.1293  | 0.0379  | 0.1213   | 0.0901  | 0.1202  | 0.2162  | 0.0154  | 0.0870  |
| 1 | -3.3426                   | -0.1035 | -0.0001 | 0.1145  | 0.1256  | 0.0365  | 0.1163   | 0.0893  | 0.1109  | 0.2108  | 0.0088  | 0.0881  |
| 1 | -2.6821                   | -1.4796 | -0.8741 | 0.1227  | 0.1293  | 0.0379  | 0.1213   | 0.0901  | 0.1202  | 0.2162  | 0.0154  | 0.0870  |

Dipole mement (in D) 1.71 (DEN) 2.09 0.85 1.31 1.53 1.82 1.76 3.14 5.45 1.85

-----  
File TZVPMol253.out

Molecule PMol253 para-fluorotoluene

SP Mol253 B3LYP/Def2TZVP VAC.

0 15

Dipole 1.8803 0.0000 0.0226 1.8804

Quadrupole -1.8361 4.7657 -2.9296 0.0000 0.0650 0.0000

|   | Atomic coordinates (in A) |         |         | Mul.    | Lowdin  | Hirsch. | I-Hirsch | CM5     | ESP     | NPA     | AIM     | ACP     |
|---|---------------------------|---------|---------|---------|---------|---------|----------|---------|---------|---------|---------|---------|
| 6 | 1.3559                    | 0.0000  | -0.0107 | 0.1484  | -0.1747 | 0.0012  | 0.1390   | -0.0165 | 0.2634  | -0.0395 | -0.0001 | 0.0323  |
| 6 | 0.6377                    | 1.1946  | -0.0096 | -0.1611 | -0.1087 | -0.0382 | -0.0997  | -0.0917 | -0.2222 | -0.1855 | -0.0228 | -0.0883 |
| 6 | 0.6377                    | -1.1946 | -0.0096 | -0.1611 | -0.1087 | -0.0382 | -0.0997  | -0.0917 | -0.2222 | -0.1855 | -0.0227 | -0.0883 |
| 6 | -0.7495                   | 1.2071  | -0.0014 | -0.1824 | -0.1196 | -0.0534 | -0.2634  | -0.1045 | -0.2558 | -0.2669 | -0.0068 | -0.1032 |
| 6 | -0.7495                   | -1.2071 | -0.0014 | -0.1824 | -0.1196 | -0.0534 | -0.2634  | -0.1045 | -0.2558 | -0.2669 | -0.0069 | -0.1032 |
| 6 | -1.4209                   | 0.0000  | 0.0038  | 0.3031  | -0.2682 | 0.0889  | 0.3733   | 0.1000  | 0.3694  | 0.3714  | 0.5115  | 0.1778  |
| 1 | 1.1736                    | 2.1367  | -0.0176 | 0.1095  | 0.1460  | 0.0410  | 0.1036   | 0.0979  | 0.1479  | 0.2061  | 0.0286  | 0.0844  |
| 1 | 1.1736                    | -2.1367 | -0.0176 | 0.1095  | 0.1460  | 0.0410  | 0.1036   | 0.0979  | 0.1479  | 0.2061  | 0.0286  | 0.0844  |
| 1 | -1.3093                   | 2.1323  | -0.0034 | 0.1174  | 0.1494  | 0.0491  | 0.1276   | 0.1064  | 0.1646  | 0.2232  | 0.0548  | 0.0868  |
| 1 | -1.3093                   | -2.1323 | -0.0034 | 0.1174  | 0.1494  | 0.0491  | 0.1276   | 0.1064  | 0.1646  | 0.2232  | 0.0548  | 0.0868  |
| 9 | -2.7638                   | 0.0000  | 0.0083  | -0.2132 | 0.1825  | -0.1127 | -0.1903  | -0.1368 | -0.2275 | -0.3141 | -0.6686 | -0.1768 |
| 6 | 2.8525                    | 0.0000  | 0.0113  | -0.3612 | -0.2538 | -0.0817 | -0.4014  | -0.2268 | -0.4074 | -0.6077 | 0.0184  | -0.2498 |

|   |        |         |         |        |        |        |        |        |        |        |        |        |
|---|--------|---------|---------|--------|--------|--------|--------|--------|--------|--------|--------|--------|
| 1 | 3.2358 | -0.0000 | 1.0336  | 0.1229 | 0.1284 | 0.0360 | 0.1154 | 0.0878 | 0.1150 | 0.2141 | 0.0133 | 0.0842 |
| 1 | 3.2636 | -0.8801 | -0.4803 | 0.1167 | 0.1259 | 0.0357 | 0.1139 | 0.0882 | 0.1091 | 0.2111 | 0.0085 | 0.0864 |
| 1 | 3.2636 | 0.8801  | -0.4803 | 0.1167 | 0.1259 | 0.0357 | 0.1139 | 0.0882 | 0.1091 | 0.2111 | 0.0085 | 0.0864 |

Dipole mement (in D) 1.88 (DEN) 2.43 0.70 1.45 1.60 2.00 1.92 3.30 5.65 2.00

-----  
File TZVPMol254.out

Molecule PMol254 1,3-difluorobenzene

SP Mol254 B3LYP/Def2TZVP VAC.

0 12

Dipole 0.0000 0.0000 1.4612 1.4612

Quadrupole -1.7768 -3.1413 4.9181 0.0000 0.0000 0.0000

|   | Atomic coordinates (in A) |         |         | Mul.    | Lowdin  | Hirsch. | I-Hirsch | CM5     | ESP     | NPA     | AIM     | ACP     |
|---|---------------------------|---------|---------|---------|---------|---------|----------|---------|---------|---------|---------|---------|
| 6 | 0.0000                    | 1.1794  | -0.3044 | 0.3118  | -0.2620 | 0.1005  | 0.4259   | 0.1121  | 0.4791  | 0.3994  | 0.5350  | 0.1907  |
| 6 | 0.0000                    | 0.0000  | -1.0262 | -0.2508 | -0.0970 | -0.0647 | -0.4501  | -0.1109 | -0.4737 | -0.3418 | 0.0143  | -0.1210 |
| 6 | 0.0000                    | 1.2087  | 1.0781  | -0.1950 | -0.1270 | -0.0587 | -0.2986  | -0.1100 | -0.3915 | -0.2939 | -0.0017 | -0.1101 |
| 6 | 0.0000                    | -1.1794 | -0.3044 | 0.3118  | -0.2620 | 0.1005  | 0.4259   | 0.1121  | 0.4791  | 0.3994  | 0.5354  | 0.1907  |
| 6 | 0.0000                    | 0.0000  | 1.7599  | -0.0876 | -0.1233 | -0.0254 | 0.0053   | -0.0808 | 0.0088  | -0.1675 | -0.0047 | -0.0697 |
| 6 | 0.0000                    | -1.2087 | 1.0781  | -0.1950 | -0.1270 | -0.0587 | -0.2986  | -0.1100 | -0.3915 | -0.2939 | -0.0015 | -0.1101 |
| 1 | 0.0000                    | 0.0000  | -2.1057 | 0.1350  | 0.1572  | 0.0597  | 0.1654   | 0.1181  | 0.2189  | 0.2398  | 0.0845  | 0.0921  |
| 1 | 0.0000                    | 2.1577  | 1.5942  | 0.1253  | 0.1508  | 0.0515  | 0.1336   | 0.1088  | 0.1898  | 0.2278  | 0.0612  | 0.0898  |
| 9 | 0.0000                    | -2.3358 | -0.9784 | -0.2032 | 0.1959  | -0.1028 | -0.1759  | -0.1272 | -0.2198 | -0.3063 | -0.6645 | -0.1682 |
| 1 | 0.0000                    | 0.0000  | 2.8417  | 0.1257  | 0.1478  | 0.0495  | 0.1092   | 0.1058  | 0.1310  | 0.2155  | 0.0457  | 0.0943  |
| 1 | 0.0000                    | -2.1577 | 1.5942  | 0.1253  | 0.1508  | 0.0515  | 0.1336   | 0.1088  | 0.1898  | 0.2278  | 0.0612  | 0.0898  |
| 9 | 0.0000                    | 2.3358  | -0.9784 | -0.2032 | 0.1959  | -0.1028 | -0.1759  | -0.1272 | -0.2198 | -0.3063 | -0.6645 | -0.1682 |

Dipole mement (in D) 1.46 (DEN) 1.74 0.22 1.03 1.44 1.51 1.50 2.94 5.26 1.62

-----  
File TZVPMol255.out

Molecule PMol255 1,2,3,4-tetrafluorobenze

SP Mol255 B3LYP/Def2TZVP VAC.

0 12

Dipole 0.0000 0.0000 -2.3477 2.3477

Quadrupole 1.2553 -5.3444 4.0892 0.0000 0.0000 0.0000

|   | Atomic coordinates (in A) |         |         | Mul.    | Lowdin  | Hirsch. | I-Hirsch | CM5     | ESP     | NPA     | AIM     | ACP     |
|---|---------------------------|---------|---------|---------|---------|---------|----------|---------|---------|---------|---------|---------|
| 6 | 0.0000                    | 0.6932  | 0.6838  | 0.1820  | -0.2368 | 0.0769  | 0.1275   | 0.0994  | 0.1235  | 0.2703  | 0.6199  | 0.1529  |
| 6 | 0.0000                    | -0.6932 | 0.6838  | 0.1820  | -0.2368 | 0.0769  | 0.1275   | 0.0994  | 0.1235  | 0.2703  | 0.6197  | 0.1529  |
| 6 | 0.0000                    | 1.3770  | -0.5242 | 0.2226  | -0.2580 | 0.0818  | 0.2464   | 0.0987  | 0.2549  | 0.3160  | 0.5822  | 0.1642  |
| 6 | 0.0000                    | -1.3770 | -0.5242 | 0.2226  | -0.2580 | 0.0818  | 0.2464   | 0.0987  | 0.2549  | 0.3160  | 0.5820  | 0.1642  |
| 6 | 0.0000                    | 0.6942  | -1.7233 | -0.1811 | -0.1119 | -0.0466 | -0.2300  | -0.0972 | -0.2987 | -0.2600 | 0.0160  | -0.0977 |
| 6 | 0.0000                    | -0.6942 | -1.7233 | -0.1811 | -0.1119 | -0.0466 | -0.2300  | -0.0972 | -0.2987 | -0.2600 | 0.0159  | -0.0977 |
| 9 | 0.0000                    | -1.3515 | 1.8333  | -0.1731 | 0.2352  | -0.0802 | -0.1325  | -0.1029 | -0.1259 | -0.2722 | -0.6415 | -0.1559 |
| 9 | 0.0000                    | 2.7087  | -0.4969 | -0.1883 | 0.2151  | -0.0915 | -0.1560  | -0.1150 | -0.1666 | -0.2880 | -0.6518 | -0.1623 |
| 9 | 0.0000                    | -2.7087 | -0.4969 | -0.1883 | 0.2151  | -0.0915 | -0.1560  | -0.1150 | -0.1666 | -0.2880 | -0.6518 | -0.1623 |
| 1 | 0.0000                    | 1.2557  | -2.6460 | 0.1379  | 0.1564  | 0.0596  | 0.1446   | 0.1171  | 0.2129  | 0.2339  | 0.0754  | 0.0988  |
| 1 | 0.0000                    | -1.2557 | -2.6460 | 0.1379  | 0.1564  | 0.0596  | 0.1446   | 0.1171  | 0.2129  | 0.2339  | 0.0754  | 0.0988  |

|                      |            |        |        |         |        |         |         |         |         |         |         |         |
|----------------------|------------|--------|--------|---------|--------|---------|---------|---------|---------|---------|---------|---------|
| 9                    | 0.0000     | 1.3515 | 1.8333 | -0.1731 | 0.2352 | -0.0802 | -0.1325 | -0.1029 | -0.1259 | -0.2722 | -0.6415 | -0.1559 |
| Dipole moment (in D) | 2.35 (DEN) |        | 2.58   | 0.74    | 1.63   | 1.86    | 2.47    | 2.36    | 4.88    | 9.23    | 2.69    |         |

-----  
File TZVPMol256.out  
Molecule PMol256 1,2-difluorobenzene  
SP Mol256 B3LYP/Def2TZVP VAC.

|                      |                           |         |         |         |         |         |          |         |         |         |         |         |
|----------------------|---------------------------|---------|---------|---------|---------|---------|----------|---------|---------|---------|---------|---------|
| 0                    | 12                        |         |         |         |         |         |          |         |         |         |         |         |
| Dipole               | 0.0000                    | 0.0000  | 2.4522  | 2.4522  |         |         |          |         |         |         |         |         |
| Quadrupole           | -2.5115                   | 3.1360  | -0.6245 | 0.0000  | 0.0000  | 0.0000  |          |         |         |         |         |         |
|                      | Atomic coordinates (in A) |         |         | Mul.    | Lowdin  | Hirsch. | I-Hirsch | CM5     | ESP     | NPA     | AIM     | ACP     |
| 6                    | 0.0000                    | 0.6938  | -0.5335 | 0.2351  | -0.2533 | 0.0833  | 0.2415   | 0.0998  | 0.2603  | 0.3183  | 0.5615  | 0.1658  |
| 6                    | 0.0000                    | -0.6938 | -0.5335 | 0.2351  | -0.2533 | 0.0833  | 0.2415   | 0.0998  | 0.2603  | 0.3183  | 0.5619  | 0.1658  |
| 6                    | 0.0000                    | 1.3934  | 0.6568  | -0.1786 | -0.1133 | -0.0467 | -0.2367  | -0.0977 | -0.2427 | -0.2602 | 0.0007  | -0.0967 |
| 6                    | 0.0000                    | -1.3934 | 0.6568  | -0.1786 | -0.1133 | -0.0467 | -0.2367  | -0.0977 | -0.2427 | -0.2602 | 0.0008  | -0.0967 |
| 6                    | 0.0000                    | 0.6937  | 1.8564  | -0.1100 | -0.1395 | -0.0391 | -0.0782  | -0.0948 | -0.1451 | -0.2057 | -0.0107 | -0.0845 |
| 6                    | 0.0000                    | -0.6937 | 1.8564  | -0.1100 | -0.1395 | -0.0391 | -0.0782  | -0.0948 | -0.1451 | -0.2057 | -0.0108 | -0.0845 |
| 9                    | 0.0000                    | -1.3416 | -1.6994 | -0.1945 | 0.2077  | -0.0976 | -0.1637  | -0.1210 | -0.1878 | -0.2941 | -0.6560 | -0.1678 |
| 1                    | 0.0000                    | 2.4743  | 0.6255  | 0.1279  | 0.1526  | 0.0540  | 0.1317   | 0.1113  | 0.1715  | 0.2271  | 0.0634  | 0.0924  |
| 1                    | 0.0000                    | -2.4743 | 0.6255  | 0.1279  | 0.1526  | 0.0540  | 0.1317   | 0.1113  | 0.1715  | 0.2271  | 0.0634  | 0.0924  |
| 1                    | 0.0000                    | 1.2382  | 2.7907  | 0.1201  | 0.1458  | 0.0461  | 0.1055   | 0.1023  | 0.1437  | 0.2147  | 0.0411  | 0.0908  |
| 1                    | 0.0000                    | -1.2382 | 2.7907  | 0.1201  | 0.1458  | 0.0461  | 0.1055   | 0.1023  | 0.1437  | 0.2147  | 0.0411  | 0.0908  |
| 9                    | 0.0000                    | 1.3416  | -1.6994 | -0.1945 | 0.2077  | -0.0976 | -0.1637  | -0.1210 | -0.1878 | -0.2941 | -0.6560 | -0.1678 |
| Dipole moment (in D) | 2.45 (DEN)                |         | 2.87    | 0.47    | 1.73    | 2.17    | 2.57     | 2.50    | 4.98    | 9.12    | 2.76    |         |

-----  
File TZVPMol257.out  
Molecule PMol257 fluoroacetylene  
SP Mol257 B3LYP/Def2TZVP VAC.

|                      |                           |         |         |         |         |         |          |         |         |         |         |         |
|----------------------|---------------------------|---------|---------|---------|---------|---------|----------|---------|---------|---------|---------|---------|
| 0                    | 4                         |         |         |         |         |         |          |         |         |         |         |         |
| Dipole               | 0.0000                    | 0.0000  | -0.5417 | 0.5417  |         |         |          |         |         |         |         |         |
| Quadrupole           | -1.3506                   | -1.3506 | 2.7012  | 0.0000  | 0.0000  | 0.0000  |          |         |         |         |         |         |
|                      | Atomic coordinates (in A) |         |         | Mul.    | Lowdin  | Hirsch. | I-Hirsch | CM5     | ESP     | NPA     | AIM     | ACP     |
| 6                    | 0.0000                    | 0.0000  | -1.2839 | -0.2973 | -0.1543 | -0.1335 | -0.4647  | -0.1839 | -0.5997 | -0.4034 | 0.2251  | -0.1896 |
| 6                    | 0.0000                    | 0.0000  | -0.0911 | 0.2385  | -0.2792 | 0.0583  | 0.2902   | 0.0780  | 0.3016  | 0.4046  | 0.2573  | 0.1360  |
| 9                    | 0.0000                    | 0.0000  | 1.1770  | -0.1364 | 0.3051  | -0.0148 | -0.0605  | -0.0385 | -0.0467 | -0.2403 | -0.6597 | -0.0828 |
| 1                    | 0.0000                    | 0.0000  | -2.3434 | 0.1952  | 0.1284  | 0.0901  | 0.2350   | 0.1444  | 0.3448  | 0.2392  | 0.1775  | 0.1364  |
| Dipole moment (in D) | 0.54 (DEN)                |         | 1.24    | 1.35    | 0.30    | 0.25    | 0.74     | 0.58    | 1.74    | 7.23    | 0.89    |         |

-----  
File TZVPMol258.out  
Molecule PMol258 acetyl\_fluoride  
SP Mol258 B3LYP/Def2TZVP VAC.

|        |         |        |        |        |  |
|--------|---------|--------|--------|--------|--|
| 0      | 7       |        |        |        |  |
| Dipole | -2.9202 | 0.6414 | 0.0002 | 2.9898 |  |

```

Quadrupole      0.7118  -2.4661  1.7544  0.9419  0.0002  -0.0006
Atomic coordinates (in A)      Mul.      Lowdin      Hirsch.      I-Hirsch      CM5      ESP      NPA      AIM      ACP
1      -1.7837  -1.0642  -0.0003  0.1366  0.1377  0.0563  0.1662  0.1115  0.1486  0.2352  0.0557  0.1030
6      -1.3557  -0.0686  -0.0000  -0.3318  -0.2589  -0.0734  -0.6042  -0.2144  -0.4969  -0.7236  0.0194  -0.2464
6      0.1258  -0.1394  0.0000  0.3274  -0.5016  0.2488  0.8869  0.2946  0.7795  0.8506  1.6090  0.4744
8      0.8359  -1.0834  -0.0002  -0.2246  0.1731  -0.2326  -0.5226  -0.2797  -0.4757  -0.5078  -1.1599  -0.3636
1      -1.6987  0.4826  0.8735  0.1410  0.1437  0.0589  0.1647  0.1125  0.1594  0.2427  0.0583  0.1072
1      -1.6986  0.4831  -0.8732  0.1410  0.1437  0.0589  0.1647  0.1125  0.1594  0.2427  0.0583  0.1072
9      0.6525  1.1126  0.0001  -0.1896  0.1622  -0.1167  -0.2556  -0.1371  -0.2744  -0.3397  -0.6418  -0.1819

Dipole mement (in D)      2.99 (DEN)      2.61      1.00      2.16      2.69      2.82      3.00      3.88      7.41      2.85

```

```

-----
File TZVPMol259.out
Molecule PMol259      3,3,3-trifluoropropyne
SP Mol259 B3LYP/Def2TZVP VAC.
0      7

```

```

Dipole      -2.3698  0.0000  0.0000  2.3698
Quadrupole      6.0367  -3.0182  -3.0185  0.0015  0.0000  0.0000
Atomic coordinates (in A)      Mul.      Lowdin      Hirsch.      I-Hirsch      CM5      ESP      NPA      AIM      ACP
6      -2.3208  -0.0001  0.0000  0.0147  -0.0199  -0.0386  -0.1079  -0.0894  -0.2889  -0.1238  -0.1020  -0.0967
6      -1.1250  0.0000  0.0000  -0.2427  -0.0644  -0.0589  -0.2887  -0.0564  -0.0983  -0.1380  -0.0789  -0.0654
1      -3.3835  -0.0004  0.0000  0.2097  0.1349  0.1064  0.2123  0.1602  0.2994  0.2386  0.1910  0.1554
6      0.3297  0.0000  0.0000  0.5026  -0.6916  0.2927  1.0197  0.3492  0.6996  0.9166  1.8828  0.5385
9      0.8178  1.2460  0.0000  -0.1614  0.2137  -0.1005  -0.2784  -0.1212  -0.2037  -0.2978  -0.6311  -0.1772
9      0.8178  -0.6230  1.0791  -0.1614  0.2137  -0.1005  -0.2785  -0.1212  -0.2041  -0.2978  -0.6310  -0.1773
9      0.8178  -0.6230  -1.0791  -0.1614  0.2137  -0.1005  -0.2785  -0.1212  -0.2041  -0.2978  -0.6310  -0.1773

Dipole mement (in D)      2.37 (DEN)      3.37      0.20      1.70      2.35      2.18      2.41      3.81      6.00      2.33

```

```

-----
File TZVPMol260.out
Molecule PMol260      tetrafluoropropyne
SP Mol260 B3LYP/Def2TZVP VAC.
0      7

```

```

Dipole      -0.2762  1.9490  0.0000  1.9685
Quadrupole      -0.6918  1.4277  -0.7359  -0.3080  0.0000  0.0000
Atomic coordinates (in A)      Mul.      Lowdin      Hirsch.      I-Hirsch      CM5      ESP      NPA      AIM      ACP
6      -0.2506  1.7649  0.0000  0.4752  -0.1936  0.1064  0.3822  0.1296  0.3078  0.4937  0.3465  0.1771
6      -0.0830  0.5854  0.0000  -0.4113  -0.0803  -0.0946  -0.5712  -0.0883  -0.3958  -0.2985  0.3127  -0.1113
9      -0.4270  3.0126  0.0000  -0.1053  0.3355  0.0081  -0.0460  -0.0159  -0.0284  -0.2208  -0.6495  -0.0627
6      0.1206  -0.8499  0.0000  0.5314  -0.6927  0.2905  1.0528  0.3469  0.6995  0.9253  1.8855  0.5366
9      1.4230  -1.1628  0.0000  -0.1633  0.2104  -0.1035  -0.2726  -0.1241  -0.1932  -0.2999  -0.6317  -0.1798
9      -0.4270  -1.4250  1.0787  -0.1634  0.2104  -0.1035  -0.2726  -0.1241  -0.1949  -0.2999  -0.6317  -0.1799
9      -0.4270  -1.4250  -1.0787  -0.1634  0.2104  -0.1035  -0.2726  -0.1241  -0.1949  -0.2999  -0.6317  -0.1799

Dipole mement (in D)      1.97 (DEN)      2.35      1.78      1.58      1.94      1.61      2.00      2.18      1.11      1.57

```



-----  
File TZVPMol261.out

Molecule PMol261 carbonyl fluoride

SP Mol261 B3LYP/Def2TZVP VAC.

0 4

Dipole 0.0000 0.0000 -1.0947 1.0947

Quadrupole 2.2313 -0.1001 -2.1312 0.0000 0.0000 0.0000

|   | Atomic coordinates (in A) |         |         | Mul.    | Lowdin  | Hirsch. | I-Hirsch | CM5     | ESP     | NPA     | AIM     | ACP     |
|---|---------------------------|---------|---------|---------|---------|---------|----------|---------|---------|---------|---------|---------|
| 6 | 0.0000                    | 0.0000  | 0.1439  | 0.4792  | -0.6716 | 0.3431  | 1.0892   | 0.4236  | 0.8270  | 1.0941  | 2.4023  | 0.6287  |
| 8 | 0.0000                    | 0.0000  | 1.3144  | -0.2027 | 0.1869  | -0.2176 | -0.5827  | -0.2610 | -0.4436 | -0.5180 | -1.1474 | -0.3546 |
| 9 | 0.0000                    | 1.0572  | -0.6322 | -0.1383 | 0.2424  | -0.0627 | -0.2532  | -0.0813 | -0.1917 | -0.2881 | -0.6274 | -0.1371 |
| 9 | 0.0000                    | -1.0572 | -0.6322 | -0.1383 | 0.2424  | -0.0627 | -0.2532  | -0.0813 | -0.1917 | -0.2881 | -0.6274 | -0.1371 |

Dipole mement (in D) 1.09 (DEN) 0.11 0.76 0.76 1.39 0.86 1.06 0.76 1.77 0.97

-----  
File TZVPMol262.out

Molecule PMol262 bis(trifluoromethyl)ethe

SP Mol262 B3LYP/Def2TZVP VAC.

0 9

Dipole 0.0000 0.0000 0.0393 0.0393

Quadrupole 0.1421 0.0763 -0.2184 -0.1528 0.0000 0.0000

|   | Atomic coordinates (in A) |         |         | Mul.    | Lowdin  | Hirsch. | I-Hirsch | CM5     | ESP     | NPA     | AIM     | ACP     |
|---|---------------------------|---------|---------|---------|---------|---------|----------|---------|---------|---------|---------|---------|
| 8 | -0.0000                   | -0.0001 | 0.7755  | -0.2465 | 0.2914  | -0.1489 | -0.7388  | -0.2069 | -0.3134 | -0.5190 | -1.0391 | -0.2997 |
| 6 | -1.1856                   | 0.0044  | 0.0791  | 0.5723  | -0.8377 | 0.3421  | 1.2259   | 0.4262  | 0.6044  | 1.1398  | 2.4144  | 0.6638  |
| 6 | 1.1856                    | -0.0044 | 0.0791  | 0.5723  | -0.8377 | 0.3421  | 1.2259   | 0.4262  | 0.6291  | 1.1398  | 2.4134  | 0.6638  |
| 9 | -2.1175                   | 0.3723  | 0.9322  | -0.1440 | 0.2425  | -0.0822 | -0.2676  | -0.1005 | -0.1402 | -0.2851 | -0.6328 | -0.1636 |
| 9 | -1.1630                   | 0.8479  | -0.9450 | -0.1542 | 0.2258  | -0.0908 | -0.2967  | -0.1094 | -0.1563 | -0.2989 | -0.6316 | -0.1741 |
| 9 | -1.4790                   | -1.2021 | -0.3847 | -0.1508 | 0.2238  | -0.0946 | -0.2922  | -0.1129 | -0.1548 | -0.2964 | -0.6301 | -0.1763 |
| 9 | 1.1630                    | -0.8477 | -0.9451 | -0.1542 | 0.2258  | -0.0908 | -0.2967  | -0.1094 | -0.1611 | -0.2989 | -0.6316 | -0.1741 |
| 9 | 2.1175                    | -0.3725 | 0.9322  | -0.1440 | 0.2425  | -0.0822 | -0.2676  | -0.1005 | -0.1474 | -0.2851 | -0.6328 | -0.1636 |
| 9 | 1.4790                    | 1.2022  | -0.3845 | -0.1508 | 0.2238  | -0.0946 | -0.2922  | -0.1129 | -0.1603 | -0.2964 | -0.6301 | -0.1763 |

Dipole mement (in D) 0.04 (DEN) 0.18 0.26 0.14 0.44 0.06 0.04 0.19 0.36 0.16

-----  
File TZVPMol263.out

Molecule PMol263 cyanic fluoride

SP Mol263 B3LYP/Def2TZVP VAC.

0 3

Dipole 0.0000 0.0000 2.3213 2.3213

Quadrupole 1.3243 1.3243 -2.6485 0.0000 0.0000 0.0000

|   | Atomic coordinates (in A) |        |         | Mul.    | Lowdin  | Hirsch. | I-Hirsch | CM5     | ESP     | NPA     | AIM     | ACP     |
|---|---------------------------|--------|---------|---------|---------|---------|----------|---------|---------|---------|---------|---------|
| 9 | 0.0000                    | 0.0000 | 1.1108  | -0.0885 | 0.3403  | 0.0208  | -0.0755  | 0.0007  | -0.0441 | -0.2193 | -0.6428 | -0.0486 |
| 6 | 0.0000                    | 0.0000 | -0.1466 | 0.1565  | -0.3750 | 0.1945  | 0.5635   | 0.3355  | 0.5083  | 0.6232  | 1.7176  | 0.4187  |
| 7 | 0.0000                    | 0.0000 | -1.3025 | -0.0680 | 0.0347  | -0.2154 | -0.4880  | -0.3363 | -0.4642 | -0.4039 | -1.0747 | -0.3701 |

Dipole mement (in D) 2.32 (DEN) 0.16 1.86 1.32 2.25 1.87 2.31 0.92 2.08 1.76

-----  
File TZVPMol264.out

Molecule PMol264 trifluoroacetonitrile

SP Mol264 B3LYP/Def2TZVP VAC.

0 6

Dipole 1.3480 0.0004 0.0000 1.3480

Quadrupole -4.1251 2.0626 2.0626 -0.0016 0.0000 0.0000

|   | Atomic coordinates (in A) |         |         | Mul.    | Lowdin  | Hirsch. | I-Hirsch | CM5     | ESP     | NPA     | AIM     | ACP     |
|---|---------------------------|---------|---------|---------|---------|---------|----------|---------|---------|---------|---------|---------|
| 6 | -1.1543                   | -0.0001 | 0.0000  | -0.2466 | -0.1367 | 0.0686  | 0.0415   | 0.1931  | 0.2548  | 0.1550  | 0.9729  | 0.2051  |
| 6 | 0.3215                    | 0.0001  | 0.0000  | 0.6221  | -0.7084 | 0.3115  | 0.9808   | 0.3725  | 0.5549  | 0.9060  | 1.9677  | 0.5630  |
| 9 | 0.7828                    | 1.2463  | 0.0000  | -0.1405 | 0.2393  | -0.0798 | -0.2666  | -0.1005 | -0.1599 | -0.2802 | -0.6233 | -0.1581 |
| 9 | 0.7828                    | -0.6230 | 1.0793  | -0.1405 | 0.2393  | -0.0798 | -0.2666  | -0.1005 | -0.1601 | -0.2801 | -0.6233 | -0.1581 |
| 9 | 0.7828                    | -0.6230 | -1.0793 | -0.1405 | 0.2393  | -0.0798 | -0.2666  | -0.1005 | -0.1601 | -0.2801 | -0.6233 | -0.1581 |
| 7 | -2.3054                   | -0.0004 | 0.0000  | 0.0459  | 0.1271  | -0.1406 | -0.2226  | -0.2640 | -0.3296 | -0.2206 | -1.0706 | -0.2937 |

Dipole moment (in D) 1.35 (DEN) 0.24 0.96 0.76 0.74 1.29 1.29 0.18 2.47 1.20

-----  
File TZVPMol265.out

Molecule PMol265 1-fluoro-4-nitrobenzene

SP Mol265 B3LYP/Def2TZVP VAC.

0 14

Dipole 3.3018 0.0000 0.0001 3.3018

Quadrupole -11.3758 8.4246 2.9512 0.0000 -0.0002 0.0000

|   | Atomic coordinates (in A) |         |         | Mul.    | Lowdin  | Hirsch. | I-Hirsch | CM5     | ESP     | NPA     | AIM     | ACP     |
|---|---------------------------|---------|---------|---------|---------|---------|----------|---------|---------|---------|---------|---------|
| 6 | 0.0030                    | 1.2134  | 0.0000  | -0.1449 | -0.0805 | -0.0173 | -0.0609  | -0.0641 | -0.1463 | -0.1617 | 0.0195  | -0.0619 |
| 6 | 1.3856                    | 1.2153  | 0.0000  | -0.1603 | -0.1026 | -0.0393 | -0.2642  | -0.0900 | -0.2256 | -0.2682 | 0.0123  | -0.0915 |
| 6 | 2.0508                    | 0.0000  | 0.0000  | 0.3221  | -0.2504 | 0.1133  | 0.4085   | 0.1250  | 0.3758  | 0.4099  | 0.5426  | 0.2039  |
| 6 | 1.3856                    | -1.2153 | 0.0000  | -0.1603 | -0.1026 | -0.0393 | -0.2642  | -0.0900 | -0.2256 | -0.2682 | 0.0122  | -0.0915 |
| 6 | 0.0030                    | -1.2134 | 0.0000  | -0.1449 | -0.0805 | -0.0173 | -0.0609  | -0.0641 | -0.1463 | -0.1617 | 0.0196  | -0.0619 |
| 6 | -0.6681                   | 0.0000  | 0.0000  | 0.0676  | -0.1626 | 0.0201  | -0.0220  | 0.0718  | 0.0675  | 0.0054  | 0.2176  | 0.1157  |
| 1 | -0.5659                   | 2.1315  | 0.0000  | 0.1669  | 0.1614  | 0.0561  | 0.1347   | 0.1208  | 0.1638  | 0.2494  | 0.1042  | 0.0890  |
| 1 | 1.9516                    | 2.1359  | 0.0000  | 0.1367  | 0.1560  | 0.0597  | 0.1421   | 0.1172  | 0.1683  | 0.2342  | 0.0749  | 0.0991  |
| 1 | 1.9516                    | -2.1359 | 0.0000  | 0.1367  | 0.1560  | 0.0597  | 0.1421   | 0.1172  | 0.1683  | 0.2342  | 0.0749  | 0.0991  |
| 1 | -0.5659                   | -2.1315 | 0.0000  | 0.1669  | 0.1614  | 0.0561  | 0.1347   | 0.1208  | 0.1638  | 0.2494  | 0.1042  | 0.0890  |
| 9 | 3.3833                    | 0.0000  | -0.0000 | -0.1893 | 0.2117  | -0.0910 | -0.1695  | -0.1158 | -0.2026 | -0.2970 | -0.6604 | -0.1576 |
| 7 | -2.1371                   | 0.0000  | 0.0000  | 0.4233  | -0.0247 | 0.2437  | 0.7315   | 0.0783  | 0.6470  | 0.5033  | 0.4375  | 0.2248  |
| 8 | -2.7013                   | -1.0848 | -0.0000 | -0.3103 | -0.0213 | -0.2022 | -0.4260  | -0.1634 | -0.4041 | -0.3645 | -0.4798 | -0.2280 |
| 8 | -2.7013                   | 1.0848  | -0.0000 | -0.3103 | -0.0213 | -0.2022 | -0.4260  | -0.1634 | -0.4041 | -0.3645 | -0.4798 | -0.2280 |

Dipole moment (in D) 3.30 (DEN) 3.11 2.98 2.61 3.30 2.90 3.29 2.95 2.88 2.84

-----  
File TZVPMol322.out

Molecule PMol322 SiH

SP Mol322 B3LYP/Def2TZVP VAC.

0 2

Dipole 0.0000 0.0000 -0.0864 0.0864  
 Quadropole -1.4901 3.1347 -1.6445 0.0000 0.0000 0.0000

|    | Atomic coordinates (in A) |        |         | Mul.    | Lowdin  | Hirsch. | I-Hirsch | CM5     | ESP     | NPA     | AIM     | ACP     |
|----|---------------------------|--------|---------|---------|---------|---------|----------|---------|---------|---------|---------|---------|
| 14 | 0.0000                    | 0.0000 | 0.1013  | 0.0480  | 0.0868  | 0.1224  | 0.2628   | 0.0492  | 0.1257  | 0.3489  | 0.7115  | 0.0523  |
| 1  | 0.0000                    | 0.0000 | -1.4176 | -0.0480 | -0.0868 | -0.1224 | -0.2628  | -0.0492 | -0.1257 | -0.3489 | -0.7115 | -0.0523 |

Dipole mement (in D) 0.09 (DEN) 0.35 0.63 0.89 1.92 0.36 0.92 2.55 5.19 0.38

-----  
 File TZVPMol323.out  
 Molecule PMol323 Sis  
 SP Mol323 B3LYP/Def2TZVP VAC.  
 0 2

Dipole 0.0000 0.0000 -1.7688 1.7688  
 Quadropole 0.2180 0.2180 -0.4360 0.0000 0.0000 0.0000

|    | Atomic coordinates (in A) |        |         | Mul.    | Lowdin  | Hirsch. | I-Hirsch | CM5     | ESP     | NPA     | AIM     | ACP     |
|----|---------------------------|--------|---------|---------|---------|---------|----------|---------|---------|---------|---------|---------|
| 14 | 0.0000                    | 0.0000 | -1.0301 | 0.2320  | -0.1217 | 0.2221  | 0.3973   | 0.1805  | 0.3130  | 0.6562  | 1.1758  | 0.2035  |
| 16 | 0.0000                    | 0.0000 | 0.9014  | -0.2320 | 0.1217  | -0.2221 | -0.3973  | -0.1805 | -0.3130 | -0.6562 | -1.1758 | -0.2035 |

Dipole mement (in D) 1.77 (DEN) 2.15 1.13 2.06 3.69 1.67 2.90 6.09 10.91 1.89

-----  
 File TZVPMol324.out  
 Molecule PMol324 silyl\_radical  
 SP Mol324 B3LYP/Def2TZVP VAC.  
 0 4

Dipole 0.0000 -0.0001 -0.0927 0.0927  
 Quadropole 0.1063 0.1062 -0.2125 0.0000 0.0000 0.0000

|    | Atomic coordinates (in A) |         |         | Mul.    | Lowdin  | Hirsch. | I-Hirsch | CM5     | ESP     | NPA     | AIM     | ACP     |
|----|---------------------------|---------|---------|---------|---------|---------|----------|---------|---------|---------|---------|---------|
| 14 | -0.0000                   | 0.0000  | -0.0811 | 0.0904  | 0.1570  | 0.2165  | 0.6570   | -0.0275 | 0.3371  | 0.5478  | 2.0004  | -0.0316 |
| 1  | -1.1446                   | -0.8107 | 0.3786  | -0.0301 | -0.0523 | -0.0722 | -0.2190  | 0.0092  | -0.1153 | -0.1826 | -0.6668 | 0.0105  |
| 1  | 1.2744                    | -0.5858 | 0.3786  | -0.0301 | -0.0523 | -0.0722 | -0.2190  | 0.0092  | -0.1108 | -0.1826 | -0.6668 | 0.0105  |
| 1  | -0.1298                   | 1.3965  | 0.3788  | -0.0301 | -0.0523 | -0.0722 | -0.2190  | 0.0092  | -0.1109 | -0.1826 | -0.6668 | 0.0105  |

Dipole mement (in D) 0.09 (DEN) 0.20 0.35 0.48 1.45 0.06 0.75 1.21 4.42 0.07

-----  
 File TZVPMol325.out  
 Molecule PMol325 silylmethyl\_radical  
 SP Mol325 B3LYP/Def2TZVP VAC.  
 0 7

Dipole -0.6762 0.0000 0.0395 0.6774  
 Quadropole 0.6702 0.4580 -1.1282 0.0000 -0.1096 0.0000

|    | Atomic coordinates (in A) |         |         | Mul.    | Lowdin  | Hirsch. | I-Hirsch | CM5     | ESP     | NPA     | AIM     | ACP     |
|----|---------------------------|---------|---------|---------|---------|---------|----------|---------|---------|---------|---------|---------|
| 6  | -1.2612                   | -0.0000 | -0.0042 | -0.3794 | -0.3142 | -0.1296 | -0.5852  | -0.1895 | -0.5712 | -0.7016 | -0.8283 | -0.1751 |
| 1  | -1.8535                   | 0.9073  | 0.0171  | 0.1319  | 0.1093  | 0.0367  | 0.1411   | 0.0904  | 0.1717  | 0.1867  | 0.0503  | 0.0925  |
| 1  | -1.8535                   | -0.9073 | 0.0171  | 0.1319  | 0.1093  | 0.0367  | 0.1411   | 0.0904  | 0.1717  | 0.1867  | 0.0503  | 0.0925  |
| 14 | 0.5712                    | 0.0000  | -0.0017 | 0.2853  | 0.2207  | 0.2931  | 1.1165   | 0.0006  | 0.9005  | 0.8328  | 2.7407  | -0.0133 |

|   |        |         |         |         |         |         |         |        |         |         |         |        |
|---|--------|---------|---------|---------|---------|---------|---------|--------|---------|---------|---------|--------|
| 1 | 1.0854 | 1.2057  | -0.6824 | -0.0576 | -0.0426 | -0.0790 | -0.2716 | 0.0029 | -0.2258 | -0.1693 | -0.6743 | 0.0014 |
| 1 | 1.1067 | -0.0001 | 1.3800  | -0.0545 | -0.0399 | -0.0787 | -0.2703 | 0.0022 | -0.2211 | -0.1660 | -0.6646 | 0.0007 |
| 1 | 1.0854 | -1.2056 | -0.6826 | -0.0576 | -0.0426 | -0.0790 | -0.2716 | 0.0029 | -0.2258 | -0.1693 | -0.6743 | 0.0014 |

Dipole mement (in D) 0.68 (DEN) 0.16 0.10 0.31 0.17 0.42 0.66 0.57 1.08 0.60

-----  
File TZVPMol326.out

Molecule PMol326 methylsilane

SP Mol326 B3LYP/Def2TZVP VAC.

0 8

Dipole 0.8005 0.0001 0.0000 0.8005

Quadrupole -0.1849 0.0925 0.0924 -0.0001 0.0000 0.0001

|    | Atomic coordinates (in A) | Mul.    | Lowdin  | Hirsch. | I-Hirsch | CM5     | ESP     | NPA     | AIM     | ACP     |
|----|---------------------------|---------|---------|---------|----------|---------|---------|---------|---------|---------|
| 6  | 1.2331 0.0000 -0.0000     | -0.4601 | -0.4799 | -0.1730 | -0.8051  | -0.2824 | -0.3849 | -1.0699 | -0.7408 | -0.2852 |
| 1  | 1.6292 -1.0127 0.0513     | 0.1250  | 0.1254  | 0.0381  | 0.1569   | 0.0928  | 0.0812  | 0.2337  | 0.0204  | 0.0974  |
| 1  | 1.6293 0.5508 0.8514      | 0.1250  | 0.1254  | 0.0381  | 0.1569   | 0.0928  | 0.0825  | 0.2337  | 0.0204  | 0.0974  |
| 1  | 1.6293 0.4619 -0.9027     | 0.1250  | 0.1254  | 0.0381  | 0.1569   | 0.0928  | 0.0812  | 0.2337  | 0.0204  | 0.0974  |
| 14 | -0.6308 0.0000 0.0000     | 0.2728  | 0.2456  | 0.3088  | 1.1830   | 0.0087  | 0.7611  | 0.9010  | 2.7252  | 0.0014  |
| 1  | -1.1518 -0.6299 1.2311    | -0.0625 | -0.0473 | -0.0833 | -0.2829  | -0.0016 | -0.2061 | -0.1774 | -0.6816 | -0.0029 |
| 1  | -1.1518 1.3811 -0.0701    | -0.0625 | -0.0473 | -0.0833 | -0.2829  | -0.0016 | -0.2062 | -0.1774 | -0.6816 | -0.0029 |
| 1  | -1.1518 -0.7512 -1.1610   | -0.0625 | -0.0473 | -0.0833 | -0.2829  | -0.0016 | -0.2089 | -0.1774 | -0.6816 | -0.0029 |

Dipole mement (in D) 0.80 (DEN) 0.42 0.14 0.32 0.03 0.51 0.77 0.63 0.85 0.64

-----  
File TZVPMol327.out

Molecule PMol327 dimethylsilane

SP Mol327 B3LYP/Def2TZVP VAC.

0 11

Dipole 0.0000 -0.7723 0.0000 0.7723

Quadrupole -0.0886 -0.7179 0.8066 0.0000 0.0000 0.0000

|    | Atomic coordinates (in A) | Mul.    | Lowdin  | Hirsch. | I-Hirsch | CM5     | ESP     | NPA     | AIM     | ACP     |
|----|---------------------------|---------|---------|---------|----------|---------|---------|---------|---------|---------|
| 1  | 1.1938 1.4252 0.0000      | -0.0731 | -0.0421 | -0.0914 | -0.3153  | -0.0094 | -0.2314 | -0.1955 | -0.6891 | -0.0148 |
| 14 | 0.0000 0.5492 0.0000      | 0.3450  | 0.2582  | 0.3282  | 1.3684   | 0.0539  | 0.8454  | 1.1623  | 2.7612  | 0.0524  |
| 1  | -1.1938 1.4252 0.0000     | -0.0731 | -0.0421 | -0.0914 | -0.3153  | -0.0094 | -0.2328 | -0.1955 | -0.6891 | -0.0148 |
| 6  | 0.0000 -0.5092 1.5368     | -0.4613 | -0.4608 | -0.1777 | -0.8418  | -0.2869 | -0.5158 | -1.0793 | -0.7348 | -0.2919 |
| 6  | 0.0000 -0.5092 -1.5368    | -0.4613 | -0.4608 | -0.1777 | -0.8418  | -0.2869 | -0.5158 | -1.0793 | -0.7344 | -0.2919 |
| 1  | -0.8780 -1.1534 1.5727    | 0.1188  | 0.1243  | 0.0346  | 0.1575   | 0.0894  | 0.1105  | 0.2298  | 0.0130  | 0.0928  |
| 1  | -0.0000 0.0930 2.4438     | 0.1243  | 0.1252  | 0.0359  | 0.1579   | 0.0906  | 0.1054  | 0.2340  | 0.0173  | 0.0949  |
| 1  | 0.8780 -1.1534 1.5727     | 0.1188  | 0.1243  | 0.0346  | 0.1575   | 0.0894  | 0.1092  | 0.2298  | 0.0130  | 0.0928  |
| 1  | -0.8780 -1.1534 -1.5727   | 0.1188  | 0.1243  | 0.0346  | 0.1575   | 0.0894  | 0.1105  | 0.2298  | 0.0130  | 0.0928  |
| 1  | 0.8780 -1.1534 -1.5727    | 0.1188  | 0.1243  | 0.0346  | 0.1575   | 0.0894  | 0.1092  | 0.2298  | 0.0130  | 0.0928  |
| 1  | -0.0000 0.0930 -2.4438    | 0.1243  | 0.1252  | 0.0359  | 0.1579   | 0.0906  | 0.1054  | 0.2340  | 0.0173  | 0.0949  |

Dipole mement (in D) 0.77 (DEN) 0.36 0.28 0.25 0.06 0.48 0.77 0.78 1.17 0.61

-----

File TZVPMol328.out

Molecule PMol328 ethylsilane

SP Mol328 B3LYP/Def2TZVP VAC.

0 11

Dipole -0.3389 0.8008 0.0000 0.8696

Quadrupole -0.3847 -0.0791 0.4638 0.4187 0.0000 0.0000

|    | Atomic coordinates (in A) |         |         | Mul.    | Lowdin  | Hirsch. | I-Hirsch | CM5     | ESP     | NPA     | AIM     | ACP     |
|----|---------------------------|---------|---------|---------|---------|---------|----------|---------|---------|---------|---------|---------|
| 6  | -1.5237                   | 0.8289  | 0.0000  | -0.3370 | -0.3274 | -0.0800 | -0.2712  | -0.2273 | -0.0947 | -0.5892 | 0.0185  | -0.2379 |
| 6  | 0.0000                    | 0.8673  | 0.0000  | -0.2823 | -0.4334 | -0.1309 | -0.6117  | -0.2019 | -0.0697 | -0.8253 | -0.6873 | -0.1757 |
| 14 | 0.7978                    | -0.8264 | 0.0000  | 0.2603  | 0.2713  | 0.3023  | 1.1537   | 0.0029  | 0.6923  | 0.8963  | 2.7115  | -0.0073 |
| 1  | 0.3649                    | 1.4210  | 0.8683  | 0.1054  | 0.1379  | 0.0338  | 0.1316   | 0.0920  | 0.0025  | 0.2232  | 0.0042  | 0.0905  |
| 1  | 0.3649                    | 1.4210  | -0.8683 | 0.1054  | 0.1379  | 0.0338  | 0.1316   | 0.0920  | 0.0025  | 0.2232  | 0.0042  | 0.0905  |
| 1  | 2.2721                    | -0.7207 | 0.0000  | -0.0627 | -0.0459 | -0.0824 | -0.2829  | -0.0007 | -0.2092 | -0.1736 | -0.6811 | -0.0021 |
| 1  | -1.9585                   | 1.8284  | 0.0000  | 0.1130  | 0.1148  | 0.0297  | 0.1073   | 0.0810  | 0.0405  | 0.2037  | -0.0019 | 0.0829  |
| 1  | -1.9136                   | 0.3095  | 0.8758  | 0.1126  | 0.1180  | 0.0303  | 0.1055   | 0.0828  | 0.0162  | 0.1990  | -0.0035 | 0.0836  |
| 1  | -1.9136                   | 0.3095  | -0.8758 | 0.1126  | 0.1180  | 0.0303  | 0.1055   | 0.0828  | 0.0162  | 0.1990  | -0.0035 | 0.0836  |
| 1  | 0.3782                    | -1.5879 | -1.1969 | -0.0637 | -0.0456 | -0.0835 | -0.2847  | -0.0019 | -0.1982 | -0.1783 | -0.6805 | -0.0040 |
| 1  | 0.3782                    | -1.5879 | 1.1969  | -0.0637 | -0.0456 | -0.0835 | -0.2847  | -0.0019 | -0.1982 | -0.1783 | -0.6805 | -0.0040 |

Dipole mement (in D) 0.87 (DEN) 0.46 0.09 0.35 0.26 0.57 0.84 0.72 0.90 0.71

File TZVPMol329.out

Molecule PMol329 trimethylsilane

SP Mol329 B3LYP/Def2TZVP VAC.

0 14

Dipole 0.4623 -0.3165 0.0000 0.5603

Quadrupole -0.3644 0.0146 0.3499 0.4883 0.0000 0.0000

|    | Atomic coordinates (in A) |         |         | Mul.    | Lowdin  | Hirsch. | I-Hirsch | CM5     | ESP     | NPA     | AIM     | ACP     |
|----|---------------------------|---------|---------|---------|---------|---------|----------|---------|---------|---------|---------|---------|
| 1  | -1.5395                   | 1.0533  | 0.0000  | -0.0811 | -0.0366 | -0.0977 | -0.3458  | -0.0154 | -0.2506 | -0.2107 | -0.6947 | -0.0252 |
| 14 | -0.3152                   | 0.2155  | 0.0000  | 0.4142  | 0.2455  | 0.3494  | 1.5502   | 0.1003  | 0.9078  | 1.4102  | 2.7960  | 0.1081  |
| 6  | 1.1817                    | 1.3334  | 0.0000  | -0.4616 | -0.4421 | -0.1813 | -0.8784  | -0.2901 | -0.5753 | -1.0872 | -0.7286 | -0.2980 |
| 6  | -0.3152                   | -0.8553 | 1.5309  | -0.4616 | -0.4421 | -0.1813 | -0.8784  | -0.2901 | -0.5648 | -1.0872 | -0.7285 | -0.2980 |
| 6  | -0.3152                   | -0.8553 | -1.5309 | -0.4616 | -0.4421 | -0.1813 | -0.8784  | -0.2901 | -0.5648 | -1.0872 | -0.7283 | -0.2980 |
| 1  | 2.1049                    | 0.7529  | 0.0000  | 0.1136  | 0.1237  | 0.0317  | 0.1589   | 0.0867  | 0.1199  | 0.2266  | 0.0067  | 0.0889  |
| 1  | 0.5717                    | -1.4888 | 1.5663  | 0.1136  | 0.1237  | 0.0317  | 0.1589   | 0.0867  | 0.1178  | 0.2266  | 0.0067  | 0.0889  |
| 1  | 0.5717                    | -1.4888 | -1.5663 | 0.1136  | 0.1237  | 0.0317  | 0.1589   | 0.0867  | 0.1178  | 0.2266  | 0.0067  | 0.0889  |
| 1  | 1.2046                    | 1.9783  | 0.8778  | 0.1185  | 0.1244  | 0.0328  | 0.1590   | 0.0876  | 0.1177  | 0.2304  | 0.0106  | 0.0908  |
| 1  | -1.1839                   | -1.5119 | 1.5651  | 0.1185  | 0.1244  | 0.0329  | 0.1590   | 0.0876  | 0.1146  | 0.2304  | 0.0107  | 0.0908  |
| 1  | -0.3231                   | -0.2580 | -2.4421 | 0.1185  | 0.1244  | 0.0329  | 0.1591   | 0.0876  | 0.1138  | 0.2304  | 0.0106  | 0.0908  |
| 1  | 1.2046                    | 1.9783  | -0.8778 | 0.1185  | 0.1244  | 0.0328  | 0.1590   | 0.0876  | 0.1177  | 0.2304  | 0.0106  | 0.0908  |
| 1  | -0.3231                   | -0.2580 | 2.4421  | 0.1185  | 0.1244  | 0.0329  | 0.1591   | 0.0876  | 0.1138  | 0.2304  | 0.0106  | 0.0908  |
| 1  | -1.1839                   | -1.5119 | -1.5651 | 0.1185  | 0.1244  | 0.0329  | 0.1590   | 0.0876  | 0.1146  | 0.2304  | 0.0107  | 0.0908  |

Dipole mement (in D) 0.56 (DEN) 0.22 0.36 0.14 0.12 0.35 0.59 0.71 1.15 0.43

File TZVPMol330.out

Molecule PMol330 vinylsilane

SP Mol330 B3LYP/Def2TZVP VAC.

0 9

Dipole 0.3106 0.6590 0.0000 0.7285

Quadrupole 1.0417 0.9227 -1.9644 -0.1294 0.0000 0.0000

|    | Atomic coordinates (in A) |         |         | Mul.    | Lowdin  | Hirsch. | I-Hirsch | CM5     | ESP     | NPA     | AIM     | ACP     |
|----|---------------------------|---------|---------|---------|---------|---------|----------|---------|---------|---------|---------|---------|
| 6  | 0.0000                    | 0.8583  | 0.0000  | -0.2042 | -0.3311 | -0.1254 | -0.5217  | -0.1458 | -0.2821 | -0.6271 | -0.7370 | -0.1036 |
| 6  | 1.2857                    | 1.2003  | 0.0000  | -0.2375 | -0.2050 | -0.0586 | -0.1324  | -0.1565 | -0.3543 | -0.3287 | -0.0628 | -0.1561 |
| 1  | 2.0777                    | 0.4581  | 0.0000  | 0.1164  | 0.1199  | 0.0378  | 0.1046   | 0.0918  | 0.1609  | 0.1848  | 0.0299  | 0.0877  |
| 14 | -0.5989                   | -0.8975 | 0.0000  | 0.2806  | 0.2884  | 0.3035  | 1.1317   | 0.0120  | 0.7274  | 0.8806  | 2.7306  | -0.0083 |
| 1  | -0.7349                   | 1.6605  | 0.0000  | 0.1089  | 0.1365  | 0.0396  | 0.1389   | 0.0974  | 0.1379  | 0.2132  | 0.0302  | 0.0897  |
| 1  | 1.6167                    | 2.2336  | 0.0000  | 0.1152  | 0.1178  | 0.0396  | 0.1093   | 0.0920  | 0.1703  | 0.1898  | 0.0325  | 0.0885  |
| 1  | 0.5695                    | -1.8007 | 0.0000  | -0.0630 | -0.0398 | -0.0770 | -0.2766  | 0.0054  | -0.1757 | -0.1725 | -0.6732 | 0.0022  |
| 1  | -1.4294                   | -1.1688 | 1.1923  | -0.0582 | -0.0433 | -0.0799 | -0.2769  | 0.0019  | -0.1922 | -0.1701 | -0.6750 | -0.0000 |
| 1  | -1.4294                   | -1.1688 | -1.1923 | -0.0582 | -0.0433 | -0.0799 | -0.2769  | 0.0019  | -0.1922 | -0.1701 | -0.6750 | -0.0000 |

Dipole moment (in D) 0.73 (DEN) 0.14 0.34 0.30 0.43 0.44 0.69 0.74 1.18 0.63

-----  
File TZVPMol331.out

Molecule PMol331 phenylsilane

SP Mol331 B3LYP/Def2TZVP VAC.

0 15

Dipole 0.9588 -0.0071 0.0000 0.9588

Quadrupole 1.2562 3.1295 -4.3857 -0.0804 0.0000 0.0000

|    | Atomic coordinates (in A) |         |         | Mul.    | Lowdin  | Hirsch. | I-Hirsch | CM5     | ESP     | NPA     | AIM     | ACP     |
|----|---------------------------|---------|---------|---------|---------|---------|----------|---------|---------|---------|---------|---------|
| 6  | -0.4679                   | 0.0021  | -0.0000 | -0.0000 | -0.2517 | -0.0928 | -0.4386  | -0.0659 | -0.1131 | -0.4487 | -0.7025 | -0.0150 |
| 6  | 0.2532                    | -1.1975 | -0.0000 | -0.1324 | -0.1285 | -0.0327 | -0.0133  | -0.0821 | -0.1109 | -0.1850 | -0.0294 | -0.0756 |
| 6  | 0.2551                    | 1.1985  | -0.0000 | -0.1386 | -0.1310 | -0.0334 | -0.0137  | -0.0830 | -0.0822 | -0.1861 | -0.0296 | -0.0762 |
| 6  | 1.6397                    | -1.2024 | 0.0000  | -0.1339 | -0.1383 | -0.0376 | -0.0930  | -0.0935 | -0.1063 | -0.2052 | -0.0269 | -0.0825 |
| 6  | 1.6438                    | 1.1995  | 0.0000  | -0.1347 | -0.1383 | -0.0382 | -0.0940  | -0.0940 | -0.1241 | -0.2068 | -0.0277 | -0.0831 |
| 6  | 2.3379                    | -0.0015 | 0.0000  | -0.0787 | -0.1334 | -0.0337 | -0.0764  | -0.0896 | -0.0730 | -0.1957 | -0.0262 | -0.0778 |
| 1  | -0.2753                   | -2.1454 | -0.0000 | 0.1100  | 0.1443  | 0.0400  | 0.0887   | 0.0978  | 0.1037  | 0.2031  | 0.0211  | 0.0850  |
| 1  | -0.2739                   | 2.1452  | -0.0000 | 0.1110  | 0.1444  | 0.0379  | 0.0888   | 0.0958  | 0.0885  | 0.2065  | 0.0258  | 0.0829  |
| 1  | 2.1776                    | -2.1422 | 0.0000  | 0.1100  | 0.1428  | 0.0417  | 0.0926   | 0.0978  | 0.1031  | 0.2091  | 0.0310  | 0.0859  |
| 1  | 2.1836                    | 2.1382  | 0.0000  | 0.1097  | 0.1428  | 0.0416  | 0.0926   | 0.0976  | 0.1080  | 0.2091  | 0.0309  | 0.0857  |
| 1  | 3.4207                    | -0.0034 | 0.0000  | 0.1126  | 0.1427  | 0.0425  | 0.0935   | 0.0985  | 0.0984  | 0.2087  | 0.0318  | 0.0868  |
| 14 | -2.3335                   | 0.0011  | 0.0000  | 0.2399  | 0.3260  | 0.3023  | 1.1135   | 0.0121  | 0.5809  | 0.8996  | 2.7271  | -0.0154 |
| 1  | -2.8575                   | -0.6973 | 1.1927  | -0.0564 | -0.0415 | -0.0801 | -0.2804  | 0.0018  | -0.1608 | -0.1688 | -0.6755 | -0.0012 |
| 1  | -2.8181                   | 1.3959  | -0.0000 | -0.0620 | -0.0386 | -0.0774 | -0.2797  | 0.0050  | -0.1513 | -0.1709 | -0.6750 | 0.0018  |
| 1  | -2.8575                   | -0.6974 | -1.1927 | -0.0564 | -0.0415 | -0.0801 | -0.2804  | 0.0018  | -0.1608 | -0.1688 | -0.6755 | -0.0012 |

Dipole moment (in D) 0.96 (DEN) 0.24 0.47 0.48 0.87 0.62 0.91 0.76 1.00 0.85

-----  
File TZVPMol332.out

Molecule PMol332 SiO

SP Mol332 B3LYP/Def2TZVP VAC.

```

0      2
Dipole      0.0000   0.0000   3.1043   3.1043
Quadrupole  1.3421   1.3421  -2.6841   0.0000   0.0000   0.0000
      Atomic coordinates (in A)      Mul.      Lowdin      Hirsch.      I-Hirsch      CM5      ESP      NPA      AIM      ACP
14      0.0000   0.0000   0.5491   0.3977   0.2191   0.3935   0.7326   0.3959   0.5286   1.1759   1.4295   0.3727
8       0.0000   0.0000  -0.9609  -0.3977  -0.2191  -0.3935  -0.7327  -0.3959  -0.5286  -1.1759  -1.4295  -0.3727

Dipole mement (in D)  3.10 (DEN)      2.88      1.59      2.85      5.31      2.87      3.83      8.53      10.37      2.70

```

```

-----
File TZVPMol333.out
Molecule PMol333      disiloxane
SP Mol333 B3LYP/Def2TZVP VAC.

```

```

0      9
Dipole      0.0000   0.0000  -0.2151   0.2151
Quadrupole  -0.4234   0.9496  -0.5262   0.0000   0.0000   0.0000
      Atomic coordinates (in A)      Mul.      Lowdin      Hirsch.      I-Hirsch      CM5      ESP      NPA      AIM      ACP
14      0.0000   1.5821  -0.0539   0.3569   0.1584   0.3919   1.5327   0.1482   0.8943   1.2622   2.8883   0.1408
1       0.0000   2.3472   1.2038  -0.0614  -0.0525  -0.0786  -0.3151   0.0072  -0.1994  -0.2094  -0.6807   0.0020
1       1.2018   1.9238  -0.8391  -0.0649  -0.0546  -0.0819  -0.3266   0.0031  -0.2094  -0.2160  -0.6844  -0.0015
1      -1.2018   1.9238  -0.8391  -0.0649  -0.0546  -0.0819  -0.3266   0.0031  -0.2101  -0.2160  -0.6844  -0.0015
8       0.0000   0.0000   0.3072  -0.3316   0.0066  -0.2991  -1.1288  -0.3231  -0.5507  -1.2419  -1.6779  -0.2797
14      0.0000  -1.5821  -0.0539   0.3569   0.1584   0.3919   1.5327   0.1482   0.8943   1.2622   2.8883   0.1408
1      -1.2018  -1.9238  -0.8391  -0.0649  -0.0546  -0.0819  -0.3266   0.0031  -0.2101  -0.2160  -0.6844  -0.0015
1       1.2018  -1.9238  -0.8391  -0.0649  -0.0546  -0.0819  -0.3266   0.0031  -0.2094  -0.2160  -0.6844  -0.0015
1       0.0000  -2.3472   1.2038  -0.0614  -0.0525  -0.0786  -0.3151   0.0072  -0.1994  -0.2094  -0.6807   0.0020

Dipole mement (in D)  0.22 (DEN)      0.34      0.20      0.23      0.84      0.52      0.20      1.42      0.81      0.44

```

```

-----
File TZVPMol334.out
Molecule PMol334      methyl_silyl_ether
SP Mol334 B3LYP/Def2TZVP VAC.

```

```

0      9
Dipole      1.0726  -0.2803   0.0000   1.1086
Quadrupole  1.6004  -0.8562  -0.7443   1.6716   0.0000   0.0000
      Atomic coordinates (in A)      Mul.      Lowdin      Hirsch.      I-Hirsch      CM5      ESP      NPA      AIM      ACP
8       0.0000   0.7275   0.0000  -0.3644   0.0432  -0.2407  -0.6591  -0.3075  -0.4493  -0.8456  -1.3758  -0.2838
6       1.4026   0.8405   0.0000  -0.1610  -0.3588   0.0055  -0.0050  -0.1102   0.0035  -0.2405   0.5100  -0.0865
1       1.8486   0.3786   0.8863   0.1073   0.1014   0.0329   0.0708   0.0926   0.0464   0.1624   0.0078   0.0857
1       1.8486   0.3786  -0.8863   0.1073   0.1014   0.0329   0.0708   0.0926   0.0464   0.1624   0.0078   0.0857
1       1.6651   1.8971   0.0000   0.1198   0.1080   0.0407   0.0913   0.1008   0.0776   0.1822   0.0265   0.0900
14      -0.7689  -0.7199   0.0000   0.3987   0.1697   0.3734   1.3903   0.1218   0.8828   1.2193   2.8696   0.1139
1      -0.4032  -1.5097   1.1965  -0.0746  -0.0578  -0.0858  -0.3301  -0.0018  -0.2072  -0.2215  -0.6858  -0.0060
1      -2.2070  -0.4190   0.0000  -0.0586  -0.0492  -0.0732  -0.2989   0.0133  -0.1931  -0.1972  -0.6745   0.0069
1      -0.4032  -1.5097  -1.1965  -0.0746  -0.0578  -0.0858  -0.3301  -0.0018  -0.2072  -0.2215  -0.6858  -0.0060

Dipole mement (in D)  1.11 (DEN)      1.37      0.55      0.71      1.42      1.32      1.11      2.56      3.19      1.30

```

-----  
 File TZVPMol335.out  
 Molecule PMol335 hexamethyldisiloxane  
 SP Mol335 B3LYP/Def2TZVP VAC.  
 0 27

Dipole 0.0001 -0.0002 -0.4668 0.4668

Quadrupole 2.0919 -0.7491 -1.3428 -0.0937 0.0000 0.0009

|    | Atomic coordinates (in A) |         |         | Mul.    | Lowdin  | Hirsch. | I-Hirsch | CM5     | ESP     | NPA     | AIM     | ACP     |
|----|---------------------------|---------|---------|---------|---------|---------|----------|---------|---------|---------|---------|---------|
| 6  | -2.6249                   | 0.4782  | 1.5152  | -0.4563 | -0.4183 | -0.1842 | -0.9604  | -0.2906 | -0.6024 | -1.1257 | -0.7342 | -0.3048 |
| 1  | -2.5102                   | -0.2210 | 2.3433  | 0.1166  | 0.1264  | 0.0339  | 0.1726   | 0.0898  | 0.1254  | 0.2327  | 0.0126  | 0.0899  |
| 1  | -3.6808                   | 0.4908  | 1.2432  | 0.1085  | 0.1242  | 0.0311  | 0.1627   | 0.0862  | 0.1058  | 0.2271  | 0.0045  | 0.0880  |
| 1  | -2.3729                   | 1.4699  | 1.8905  | 0.1149  | 0.1257  | 0.0333  | 0.1716   | 0.0891  | 0.1199  | 0.2318  | 0.0113  | 0.0893  |
| 14 | -1.5517                   | 0.0025  | 0.0738  | 0.5203  | 0.0950  | 0.4218  | 2.0739   | 0.2506  | 1.1888  | 1.9412  | 2.9634  | 0.2762  |
| 6  | -1.9998                   | -1.7006 | -0.5374 | -0.4573 | -0.4210 | -0.1858 | -0.9853  | -0.2926 | -0.6661 | -1.1307 | -0.7334 | -0.3069 |
| 1  | -1.4025                   | -1.9880 | -1.4031 | 0.1188  | 0.1241  | 0.0310  | 0.1753   | 0.0869  | 0.1356  | 0.2296  | 0.0078  | 0.0873  |
| 1  | -1.8407                   | -2.4558 | 0.2327  | 0.1166  | 0.1260  | 0.0326  | 0.1739   | 0.0884  | 0.1333  | 0.2313  | 0.0099  | 0.0888  |
| 1  | -3.0477                   | -1.7569 | -0.8350 | 0.1133  | 0.1249  | 0.0311  | 0.1663   | 0.0862  | 0.1222  | 0.2286  | 0.0051  | 0.0880  |
| 6  | -1.7351                   | 1.2345  | -1.3158 | -0.4704 | -0.4227 | -0.1856 | -0.9985  | -0.2924 | -0.6792 | -1.1334 | -0.7318 | -0.3068 |
| 1  | -1.1117                   | 0.9698  | -2.1715 | 0.1142  | 0.1235  | 0.0305  | 0.1723   | 0.0865  | 0.1347  | 0.2265  | 0.0024  | 0.0873  |
| 1  | -2.7639                   | 1.2869  | -1.6743 | 0.1194  | 0.1255  | 0.0318  | 0.1693   | 0.0868  | 0.1264  | 0.2305  | 0.0067  | 0.0887  |
| 1  | -1.4488                   | 2.2393  | -1.0032 | 0.1218  | 0.1258  | 0.0326  | 0.1771   | 0.0884  | 0.1390  | 0.2314  | 0.0100  | 0.0891  |
| 8  | 0.0000                    | -0.0004 | 0.5933  | -0.3607 | 0.0818  | -0.3089 | -1.3418  | -0.3271 | -0.7556 | -1.2419 | -1.6683 | -0.3080 |
| 14 | 1.5517                    | -0.0027 | 0.0738  | 0.5203  | 0.0951  | 0.4218  | 2.0739   | 0.2506  | 1.1506  | 1.9412  | 2.9629  | 0.2763  |
| 6  | 2.0015                    | 1.7032  | -0.5283 | -0.4572 | -0.4210 | -0.1858 | -0.9851  | -0.2926 | -0.6580 | -1.1307 | -0.7330 | -0.3069 |
| 1  | 3.0488                    | 1.7597  | -0.8278 | 0.1132  | 0.1249  | 0.0311  | 0.1663   | 0.0861  | 0.1245  | 0.2286  | 0.0051  | 0.0880  |
| 1  | 1.4028                    | 1.9964  | -1.3912 | 0.1188  | 0.1241  | 0.0310  | 0.1753   | 0.0869  | 0.1317  | 0.2296  | 0.0078  | 0.0873  |
| 1  | 1.8449                    | 2.4542  | 0.2463  | 0.1166  | 0.1260  | 0.0327  | 0.1738   | 0.0884  | 0.1340  | 0.2313  | 0.0099  | 0.0888  |
| 6  | 2.6245                    | -0.4873 | 1.5125  | -0.4564 | -0.4183 | -0.1842 | -0.9605  | -0.2906 | -0.6059 | -1.1257 | -0.7345 | -0.3048 |
| 1  | 2.5103                    | 0.2073  | 2.3446  | 0.1166  | 0.1264  | 0.0339  | 0.1726   | 0.0898  | 0.1287  | 0.2328  | 0.0127  | 0.0899  |
| 1  | 2.3716                    | -1.4809 | 1.8824  | 0.1148  | 0.1257  | 0.0333  | 0.1716   | 0.0891  | 0.1224  | 0.2317  | 0.0113  | 0.0893  |
| 1  | 3.6804                    | -0.4992 | 1.2405  | 0.1085  | 0.1242  | 0.0311  | 0.1627   | 0.0862  | 0.1083  | 0.2271  | 0.0045  | 0.0880  |
| 6  | 1.7339                    | -1.2275 | -1.3223 | -0.4705 | -0.4227 | -0.1856 | -0.9986  | -0.2924 | -0.6225 | -1.1334 | -0.7319 | -0.3068 |
| 1  | 2.7626                    | -1.2790 | -1.6810 | 0.1195  | 0.1255  | 0.0318  | 0.1693   | 0.0868  | 0.1151  | 0.2305  | 0.0067  | 0.0887  |
| 1  | 1.4465                    | -2.2336 | -1.0152 | 0.1218  | 0.1258  | 0.0326  | 0.1771   | 0.0884  | 0.1254  | 0.2314  | 0.0100  | 0.0891  |
| 1  | 1.1109                    | -0.9575 | -2.1767 | 0.1142  | 0.1235  | 0.0305  | 0.1723   | 0.0865  | 0.1179  | 0.2266  | 0.0024  | 0.0873  |

Dipole moment (in D) 0.47 (DEN) 0.71 0.14 0.28 1.02 0.83 0.48 1.30 0.14 0.75

-----  
 File TZVPMol336.out  
 Molecule PMol336 methoxytrimethylsilane  
 SP Mol336 B3LYP/Def2TZVP VAC.  
 0 18

Dipole -0.1090 0.0002 0.9987 1.0046

Quadrupole 2.6238 -0.6042 -2.0196 -0.0002 -0.7264 -0.0003

|    | Atomic coordinates (in A) |         |        | Mul.   | Lowdin | Hirsch. | I-Hirsch | CM5    | ESP    | NPA    | AIM    | ACP    |
|----|---------------------------|---------|--------|--------|--------|---------|----------|--------|--------|--------|--------|--------|
| 14 | 0.3767                    | -0.0000 | 0.0053 | 0.5688 | 0.1061 | 0.4146  | 1.9542   | 0.2355 | 1.0306 | 1.9129 | 2.9505 | 0.2593 |



|   |         |         |         |         |         |         |         |         |         |         |         |         |
|---|---------|---------|---------|---------|---------|---------|---------|---------|---------|---------|---------|---------|
| 6 | 0.4653  | -1.5198 | 1.0834  | -0.4728 | -0.4242 | -0.1863 | -0.9969 | -0.2936 | -0.4877 | -1.1359 | -0.7339 | -0.3069 |
| 1 | -0.3216 | -1.5297 | 1.8385  | 0.1147  | 0.1239  | 0.0303  | 0.1630  | 0.0858  | 0.0914  | 0.2281  | 0.0049  | 0.0874  |
| 1 | 0.3684  | -2.4346 | 0.4986  | 0.1222  | 0.1264  | 0.0332  | 0.1695  | 0.0888  | 0.1026  | 0.2326  | 0.0122  | 0.0898  |
| 1 | 1.4153  | -1.5734 | 1.6163  | 0.1159  | 0.1263  | 0.0323  | 0.1702  | 0.0873  | 0.0811  | 0.2311  | 0.0077  | 0.0893  |
| 6 | 0.4655  | 1.5205  | 1.0824  | -0.4728 | -0.4242 | -0.1863 | -0.9969 | -0.2936 | -0.4876 | -1.1359 | -0.7339 | -0.3069 |
| 1 | 0.3691  | 2.4350  | 0.4970  | 0.1222  | 0.1264  | 0.0332  | 0.1695  | 0.0888  | 0.1025  | 0.2326  | 0.0122  | 0.0898  |
| 1 | 1.4154  | 1.5741  | 1.6156  | 0.1159  | 0.1263  | 0.0323  | 0.1702  | 0.0873  | 0.0811  | 0.2311  | 0.0077  | 0.0893  |
| 1 | -0.3216 | 1.5311  | 1.8373  | 0.1147  | 0.1239  | 0.0303  | 0.1630  | 0.0858  | 0.0914  | 0.2281  | 0.0049  | 0.0874  |
| 6 | 1.7153  | -0.0005 | -1.2788 | -0.4481 | -0.4144 | -0.1817 | -0.9735 | -0.2878 | -0.7268 | -1.1232 | -0.7375 | -0.3026 |
| 1 | 1.6481  | -0.8788 | -1.9201 | 0.1198  | 0.1280  | 0.0357  | 0.1714  | 0.0918  | 0.1580  | 0.2353  | 0.0168  | 0.0914  |
| 1 | 1.6481  | 0.8773  | -1.9207 | 0.1198  | 0.1280  | 0.0357  | 0.1714  | 0.0918  | 0.1580  | 0.2353  | 0.0168  | 0.0914  |
| 1 | 2.7065  | -0.0003 | -0.8251 | 0.1092  | 0.1247  | 0.0318  | 0.1655  | 0.0870  | 0.1530  | 0.2275  | 0.0055  | 0.0889  |
| 8 | -1.0352 | -0.0002 | -0.8537 | -0.3725 | 0.0820  | -0.2466 | -0.7394 | -0.3111 | -0.4971 | -0.8536 | -1.3724 | -0.2990 |
| 6 | -2.3014 | -0.0000 | -0.2525 | -0.1790 | -0.3633 | -0.0001 | 0.0165  | -0.1153 | 0.0161  | -0.2363 | 0.5250  | -0.0912 |
| 1 | -2.4633 | 0.8858  | 0.3716  | 0.1013  | 0.0991  | 0.0281  | 0.0696  | 0.0879  | 0.0308  | 0.1563  | -0.0017 | 0.0793  |
| 1 | -3.0619 | -0.0000 | -1.0331 | 0.1193  | 0.1061  | 0.0356  | 0.0833  | 0.0955  | 0.0719  | 0.1776  | 0.0174  | 0.0840  |
| 1 | -2.4634 | -0.8858 | 0.3717  | 0.1013  | 0.0991  | 0.0281  | 0.0696  | 0.0879  | 0.0308  | 0.1563  | -0.0017 | 0.0793  |

Dipole moment (in D) 1.00 (DEN) 1.14 0.04 0.54 1.46 1.23 1.04 2.11 3.28 1.20

-----  
File TZVPMol337.out

Molecule PMol337 methylsilanol

SP Mol337 B3LYP/Def2TZVP VAC.

0 9

Dipole -0.8375 -0.9053 1.1833 1.7091

Quadrupole -0.7963 0.7085 0.0878 -1.3853 2.3880 -1.9241

|    | Atomic coordinates (in A) |         |         | Mul.    | Lowdin  | Hirsch. | I-Hirsch | CM5     | ESP     | NPA     | AIM     | ACP     |
|----|---------------------------|---------|---------|---------|---------|---------|----------|---------|---------|---------|---------|---------|
| 14 | 0.1094                    | 0.4918  | 0.0191  | 0.4875  | 0.1476  | 0.3845  | 1.6439   | 0.1542  | 0.9612  | 1.4551  | 2.9028  | 0.1552  |
| 1  | 0.2342                    | 1.3896  | -1.1411 | -0.0728 | -0.0454 | -0.0831 | -0.3355  | 0.0038  | -0.1962 | -0.2212 | -0.6827 | -0.0066 |
| 1  | 0.2006                    | 1.2839  | 1.2672  | -0.0902 | -0.0570 | -0.0950 | -0.3666  | -0.0107 | -0.2503 | -0.2392 | -0.6965 | -0.0179 |
| 6  | -1.5175                   | -0.4040 | -0.0141 | -0.4635 | -0.4668 | -0.1817 | -0.9161  | -0.2891 | -0.5458 | -1.1231 | -0.7514 | -0.2955 |
| 1  | -1.6295                   | -0.9944 | -0.9224 | 0.1276  | 0.1263  | 0.0381  | 0.1681   | 0.0936  | 0.1259  | 0.2364  | 0.0224  | 0.0961  |
| 1  | -1.6257                   | -1.0797 | 0.8341  | 0.1147  | 0.1230  | 0.0342  | 0.1604   | 0.0895  | 0.1138  | 0.2302  | 0.0121  | 0.0925  |
| 1  | -2.3496                   | 0.2992  | 0.0268  | 0.1196  | 0.1281  | 0.0382  | 0.1659   | 0.0931  | 0.1079  | 0.2357  | 0.0189  | 0.0971  |
| 8  | 1.3950                    | -0.5306 | -0.1088 | -0.5308 | -0.1259 | -0.3013 | -0.9985  | -0.4814 | -0.7124 | -1.0591 | -1.4122 | -0.4011 |
| 1  | 1.5838                    | -1.1145 | 0.6227  | 0.3078  | 0.1700  | 0.1660  | 0.4783   | 0.3472  | 0.3958  | 0.4851  | 0.5866  | 0.2802  |

Dipole moment (in D) 1.71 (DEN) 1.47 1.22 0.75 1.84 1.58 1.66 2.38 2.28 1.42

-----  
File TZVPMol338.out

Molecule PMol338 silanediol

SP Mol338 B3LYP/Def2TZVP VAC.

0 7

Dipole 0.0000 0.0000 -1.1206 1.1206

Quadrupole 1.0669 -2.4857 1.4188 4.8042 0.0000 0.0000

|  | Atomic coordinates (in A) |  |  | Mul. | Lowdin | Hirsch. | I-Hirsch | CM5 | ESP | NPA | AIM | ACP |
|--|---------------------------|--|--|------|--------|---------|----------|-----|-----|-----|-----|-----|
|--|---------------------------|--|--|------|--------|---------|----------|-----|-----|-----|-----|-----|

|    |         |         |         |         |         |         |         |         |         |         |         |         |
|----|---------|---------|---------|---------|---------|---------|---------|---------|---------|---------|---------|---------|
| 14 | 0.0000  | 0.0000  | 0.4590  | 0.5745  | 0.0111  | 0.4261  | 1.9066  | 0.2405  | 1.1443  | 1.6686  | 3.0257  | 0.2436  |
| 1  | -1.2187 | 0.1192  | 1.2714  | -0.0854 | -0.0588 | -0.0836 | -0.3787 | 0.0064  | -0.2299 | -0.2528 | -0.6877 | -0.0065 |
| 1  | 1.2187  | -0.1192 | 1.2714  | -0.0854 | -0.0588 | -0.0836 | -0.3787 | 0.0064  | -0.2295 | -0.2528 | -0.6877 | -0.0065 |
| 8  | 0.0000  | 1.3698  | -0.4376 | -0.5167 | -0.1183 | -0.2995 | -1.0602 | -0.4784 | -0.7531 | -1.0705 | -1.4171 | -0.3990 |
| 1  | 0.7618  | 1.5553  | -0.9838 | 0.3149  | 0.1716  | 0.1700  | 0.4856  | 0.3517  | 0.4116  | 0.4890  | 0.5918  | 0.2837  |
| 8  | 0.0000  | -1.3698 | -0.4376 | -0.5167 | -0.1183 | -0.2995 | -1.0602 | -0.4784 | -0.7588 | -1.0705 | -1.4172 | -0.3990 |
| 1  | -0.7618 | -1.5553 | -0.9838 | 0.3149  | 0.1716  | 0.1700  | 0.4856  | 0.3517  | 0.4154  | 0.4890  | 0.5918  | 0.2837  |

Dipole mement (in D) 1.12 (DEN) 0.58 1.82 0.43 0.55 0.71 1.01 0.47 1.36 0.55

-----  
File TZVPMol339.out

Molecule PMol339 silanone

SP Mol339 B3LYP/Def2TZVP VAC.

0 4

Dipole -0.0001 3.6701 0.0000 3.6701

Quadrupole 2.5330 -2.6712 0.1381 -0.0001 0.0000 0.0000

|    | Atomic coordinates (in A) |         |         | Mul.    | Lowdin  | Hirsch. | I-Hirsch | CM5     | ESP     | NPA     | AIM     | ACP     |
|----|---------------------------|---------|---------|---------|---------|---------|----------|---------|---------|---------|---------|---------|
| 14 | -0.0000                   | 0.4355  | 0.0000  | 0.5285  | 0.3247  | 0.5177  | 1.5313   | 0.3575  | 1.1995  | 1.5721  | 2.7672  | 0.3337  |
| 8  | -0.0000                   | -1.0782 | 0.0000  | -0.4800 | -0.2135 | -0.4176 | -0.9184  | -0.4251 | -0.7554 | -1.0993 | -1.4586 | -0.3941 |
| 1  | 0.0000                    | 1.2641  | 1.2219  | -0.0243 | -0.0556 | -0.0501 | -0.3064  | 0.0338  | -0.2221 | -0.2364 | -0.6543 | 0.0302  |
| 1  | 0.0000                    | 1.2641  | -1.2219 | -0.0243 | -0.0556 | -0.0501 | -0.3064  | 0.0338  | -0.2221 | -0.2364 | -0.6543 | 0.0302  |

Dipole mement (in D) 3.67 (DEN) 3.30 1.11 2.64 4.24 3.36 3.72 6.11 5.40 3.11

-----  
File TZVPMol340.out

Molecule PMol340 silanole

SP Mol340 B3LYP/Def2TZVP VAC.

0 6

Dipole 0.2319 -1.3494 0.0000 1.3692

Quadrupole 0.8350 0.3011 -1.1361 -2.9831 0.0001 0.0000

|    | Atomic coordinates (in A) |         |         | Mul.    | Lowdin  | Hirsch. | I-Hirsch | CM5     | ESP     | NPA     | AIM     | ACP     |
|----|---------------------------|---------|---------|---------|---------|---------|----------|---------|---------|---------|---------|---------|
| 14 | -0.5302                   | -0.0092 | 0.0000  | 0.4240  | 0.1440  | 0.3749  | 1.4541   | 0.1203  | 0.9219  | 1.2201  | 2.8762  | 0.1148  |
| 1  | -1.0249                   | -0.7210 | 1.1970  | -0.0768 | -0.0635 | -0.0870 | -0.3313  | -0.0031 | -0.2276 | -0.2232 | -0.6890 | -0.0059 |
| 1  | -1.0249                   | -0.7214 | -1.1968 | -0.0768 | -0.0635 | -0.0870 | -0.3313  | -0.0031 | -0.2276 | -0.2232 | -0.6890 | -0.0059 |
| 1  | -1.0231                   | 1.3746  | -0.0002 | -0.0608 | -0.0510 | -0.0744 | -0.3001  | 0.0123  | -0.1748 | -0.2042 | -0.6749 | 0.0061  |
| 8  | 1.1087                    | 0.1109  | -0.0000 | -0.5226 | -0.1372 | -0.2969 | -0.9714  | -0.4779 | -0.6902 | -1.0567 | -1.4143 | -0.3953 |
| 1  | 1.6261                    | -0.6911 | 0.0000  | 0.3129  | 0.1712  | 0.1705  | 0.4800   | 0.3515  | 0.3983  | 0.4873  | 0.5916  | 0.2862  |

Dipole mement (in D) 1.37 (DEN) 1.26 1.24 0.63 1.90 1.33 1.32 2.67 2.53 1.09

-----  
File TZVPMol341.out

Molecule PMol341 fluorosilane

SP Mol341 B3LYP/Def2TZVP VAC.

0 5

Dipole -0.0001 1.2787 0.0000 1.2787

Quadrupole 0.3614 -0.7228 0.3614 0.0001 0.0000 0.0000  
 Atomic coordinates (in A) Mul. Lowdin Hirsch. I-Hirsch CM5 ESP NPA AIM ACP  
 14 -0.0000 0.5000 0.0000 0.5061 0.1873 0.4251 1.3686 0.1548 0.9853 1.2994 2.8908 0.1537  
 1 -1.3968 0.9590 0.0000 -0.0612 -0.0584 -0.0727 -0.3041 0.0112 -0.2107 -0.2205 -0.6764 0.0095  
 1 0.6984 0.9589 1.2097 -0.0612 -0.0584 -0.0727 -0.3041 0.0112 -0.2112 -0.2205 -0.6764 0.0095  
 1 0.6984 0.9589 -1.2097 -0.0612 -0.0584 -0.0727 -0.3041 0.0112 -0.2112 -0.2205 -0.6764 0.0095  
 9 -0.0000 -1.0974 0.0000 -0.3223 -0.0119 -0.2070 -0.4563 -0.1883 -0.3522 -0.6380 -0.8614 -0.1822  
  
 Dipole mement (in D) 1.28 (DEN) 2.07 0.30 1.11 1.49 1.52 1.31 3.44 2.14 1.46

-----  
 File TZVPMol342.out

Molecule PMol342 difluorosilane

SP Mol342 B3LYP/Def2TZVP VAC.

0 5

Dipole 0.0001 1.4733 0.0000 1.4733  
 Quadrupole 1.0910 0.9323 -2.0233 0.0000 0.0000 0.0000  
 Atomic coordinates (in A) Mul. Lowdin Hirsch. I-Hirsch CM5 ESP NPA AIM ACP  
 14 0.0000 0.4476 0.0000 0.7306 0.0766 0.5207 1.7271 0.3048 0.9967 1.8077 3.0545 0.3180  
 9 0.0000 -0.4856 1.2776 -0.3014 0.0227 -0.1943 -0.5053 -0.1735 -0.3210 -0.6412 -0.8539 -0.1735  
 9 0.0000 -0.4856 -1.2776 -0.3014 0.0227 -0.1943 -0.5053 -0.1735 -0.3210 -0.6412 -0.8539 -0.1735  
 1 1.2303 1.2378 0.0000 -0.0639 -0.0610 -0.0660 -0.3582 0.0211 -0.1777 -0.2627 -0.6733 0.0144  
 1 -1.2303 1.2377 0.0000 -0.0639 -0.0610 -0.0660 -0.3582 0.0211 -0.1771 -0.2627 -0.6733 0.0144  
  
 Dipole mement (in D) 1.47 (DEN) 2.22 0.67 1.24 1.81 1.72 1.53 3.75 2.54 1.66

-----  
 File TZVPMol343.out

Molecule PMol343 trifluorosilane

SP Mol343 B3LYP/Def2TZVP VAC.

0 5

Dipole 0.0000 0.0000 1.3177 1.3177  
 Quadrupole -1.0843 -1.0843 2.1686 0.0000 0.0000 0.0000  
 Atomic coordinates (in A) Mul. Lowdin Hirsch. I-Hirsch CM5 ESP NPA AIM ACP  
 14 0.0000 0.0000 0.3226 0.9028 -0.1043 0.5977 2.0816 0.4369 1.1911 2.2065 3.1992 0.4692  
 1 0.0000 0.0000 1.7709 -0.0531 -0.0581 -0.0494 -0.4037 0.0420 -0.1873 -0.2870 -0.6591 0.0297  
 9 0.0000 1.4673 -0.2329 -0.2832 0.0541 -0.1828 -0.5593 -0.1596 -0.3344 -0.6398 -0.8466 -0.1663  
 9 -1.2707 -0.7336 -0.2329 -0.2832 0.0541 -0.1828 -0.5593 -0.1596 -0.3348 -0.6398 -0.8466 -0.1663  
 9 1.2707 -0.7336 -0.2329 -0.2832 0.0541 -0.1828 -0.5593 -0.1596 -0.3346 -0.6398 -0.8466 -0.1663  
  
 Dipole mement (in D) 1.32 (DEN) 1.90 0.84 1.12 1.67 1.57 1.37 3.12 2.19 1.54

-----  
 File TZVPMol344.out

Molecule PMol344 fluoromethylsilane

SP Mol344 B3LYP/Def2TZVP VAC.

0 8

Dipole 1.6635 0.4707 0.0001 1.7288

Quadrupole      -0.4926      0.0031      0.4895      -0.9350      -0.0001      -0.0001  
 Atomic coordinates (in A)      Mul.      Lowdin      Hirsch.      I-Hirsch      CM5      ESP      NPA      AIM      ACP  
 14      -0.1508      0.4823      0.0000      0.5695      0.1808      0.4241      1.5606      0.1782      0.9739      1.5234      2.9150      0.1841  
 1      -0.3442      1.3071      -1.2056      -0.0777      -0.0527      -0.0821      -0.3413      0.0020      -0.2212      -0.2355      -0.6846      -0.0037  
 1      -0.3443      1.3068      1.2058      -0.0777      -0.0527      -0.0821      -0.3413      0.0020      -0.2212      -0.2355      -0.6846      -0.0037  
 6      1.4964      -0.3526      0.0000      -0.4642      -0.4603      -0.1754      -0.9148      -0.2819      -0.5082      -1.1335      -0.7665      -0.2912  
 1      1.6246      -0.9805      -0.8800      0.1301      0.1297      0.0434      0.1727      0.0987      0.1228      0.2412      0.0298      0.1020  
 1      2.3012      0.3821      0.0002      0.1231      0.1311      0.0424      0.1711      0.0975      0.0974      0.2390      0.0247      0.1018  
 1      1.6245      -0.9808      0.8798      0.1301      0.1297      0.0434      0.1727      0.0987      0.1228      0.2412      0.0298      0.1020  
 9      -1.3032      -0.6302      -0.0001      -0.3333      -0.0056      -0.2137      -0.4798      -0.1952      -0.3663      -0.6402      -0.8644      -0.1914  
  
 Dipole mement (in D)      1.73 (DEN)      2.29      0.49      1.31      1.44      1.84      1.72      3.24      2.00      1.83

-----  
 File TZVPMol345.out

Molecule PMol345      difluoromethylsilane

SP Mol345 B3LYP/Def2TZVP VAC.

0      8

Dipole      -2.0155      0.0000      0.6627      2.1217  
 Quadrupole      0.9711      -2.0272      1.0560      0.0000      0.5616      0.0000  
 Atomic coordinates (in A)      Mul.      Lowdin      Hirsch.      I-Hirsch      CM5      ESP      NPA      AIM      ACP  
 14      0.0862      0.0000      0.3403      0.7827      0.0351      0.5099      1.9376      0.3176      1.1588      1.9977      3.0707      0.3409  
 1      0.3215      -0.0000      1.7863      -0.0825      -0.0544      -0.0743      -0.4017      0.0129      -0.2224      -0.2743      -0.6799      0.0022  
 6      -1.6766      -0.0000      -0.1630      -0.4672      -0.4394      -0.1744      -1.0234      -0.2783      -0.7037      -1.1788      -0.7856      -0.2943  
 1      -2.1942      -0.8790      0.2174      0.1305      0.1342      0.0469      0.1842      0.1026      0.1583      0.2446      0.0340      0.1059  
 1      -2.1939      0.8797      0.2163      0.1306      0.1342      0.0469      0.1842      0.1026      0.1583      0.2446      0.0340      0.1059  
 1      -1.7721      -0.0007      -1.2476      0.1359      0.1357      0.0497      0.1881      0.1057      0.1890      0.2498      0.0413      0.1076  
 9      0.8162      1.2730      -0.2644      -0.3149      0.0273      -0.2023      -0.5345      -0.1816      -0.3691      -0.6418      -0.8575      -0.1840  
 9      0.8162      -1.2730      -0.2644      -0.3149      0.0273      -0.2023      -0.5345      -0.1816      -0.3692      -0.6418      -0.8575      -0.1840  
  
 Dipole mement (in D)      2.12 (DEN)      2.70      0.73      1.63      1.69      2.28      2.15      3.46      2.19      2.24

-----  
 File TZVPMol346.out

Molecule PMol346      trifluoromethylsilane

SP Mol346 B3LYP/Def2TZVP VAC.

0      8

Dipole      -2.3601      -0.0011      0.0002      2.3601  
 Quadrupole      2.4124      -1.2075      -1.2049      0.0025      -0.0011      0.0000  
 Atomic coordinates (in A)      Mul.      Lowdin      Hirsch.      I-Hirsch      CM5      ESP      NPA      AIM      ACP  
 14      0.0360      0.0000      -0.0000      0.9593      -0.1718      0.5844      2.2231      0.4480      1.2630      2.3730      3.2103      0.4910  
 6      -1.7850      -0.0009      0.0003      -0.4770      -0.4170      -0.1680      -1.0879      -0.2698      -0.7965      -1.2112      -0.7968      -0.2922  
 1      -2.1753      0.3223      -0.9624      0.1387      0.1397      0.0531      0.1963      0.1095      0.1994      0.2517      0.0457      0.1119  
 1      -2.1747      -0.9964      0.2018      0.1387      0.1397      0.0531      0.1963      0.1095      0.1996      0.2517      0.0457      0.1119  
 1      -2.1752      0.6712      0.7617      0.1387      0.1397      0.0531      0.1963      0.1095      0.2011      0.2517      0.0457      0.1119  
 9      0.6203      -0.4471      1.3918      -0.2994      0.0566      -0.1919      -0.5747      -0.1689      -0.3555      -0.6390      -0.8503      -0.1782  
 9      0.6186      1.4298      -0.3087      -0.2995      0.0565      -0.1919      -0.5747      -0.1689      -0.3552      -0.6390      -0.8502      -0.1781  
 9      0.6200      -0.9817      -1.0834      -0.2995      0.0566      -0.1919      -0.5747      -0.1689      -0.3560      -0.6390      -0.8503      -0.1782

Dipole moment (in D) 2.36 (DEN) 2.77 0.33 1.84 1.57 2.55 2.40 2.80 1.64 2.51

-----  
File TZVPMol347.out

Molecule PMol347 fluorodisilane

SP Mol347 B3LYP/Def2TZVP VAC.

0 8

Dipole -0.9067 0.8905 0.0001 1.2709

Quadrupole -1.4309 0.3798 1.0511 1.3995 0.0000 0.0001

|    | Atomic coordinates (in A) |         |         | Mul.    | Lowdin  | Hirsch. | I-Hirsch | CM5     | ESP     | NPA     | AIM     | ACP     |
|----|---------------------------|---------|---------|---------|---------|---------|----------|---------|---------|---------|---------|---------|
| 14 | 0.7263                    | 0.5148  | 0.0000  | 0.4721  | 0.0828  | 0.3427  | 1.0178   | 0.1540  | 0.5875  | 1.1028  | 2.1126  | 0.1674  |
| 1  | 1.0696                    | 1.3038  | 1.1996  | -0.0634 | -0.0483 | -0.0746 | -0.2716  | 0.0093  | -0.1504 | -0.2050 | -0.6705 | 0.0041  |
| 1  | 1.0695                    | 1.3037  | -1.1997 | -0.0634 | -0.0483 | -0.0746 | -0.2716  | 0.0093  | -0.1504 | -0.2050 | -0.6705 | 0.0041  |
| 14 | -1.5186                   | -0.1370 | 0.0000  | 0.1015  | 0.1365  | 0.2219  | 0.5119   | -0.0239 | 0.4563  | 0.3418  | 2.0720  | -0.0260 |
| 1  | -2.3642                   | 1.0760  | -0.0011 | -0.0446 | -0.0359 | -0.0698 | -0.1902  | 0.0123  | -0.1589 | -0.1341 | -0.6616 | 0.0110  |
| 1  | -1.8268                   | -0.9367 | -1.2029 | -0.0377 | -0.0369 | -0.0677 | -0.1870  | 0.0148  | -0.1418 | -0.1299 | -0.6594 | 0.0133  |
| 1  | -1.8275                   | -0.9349 | 1.2039  | -0.0377 | -0.0369 | -0.0677 | -0.1870  | 0.0148  | -0.1417 | -0.1299 | -0.6594 | 0.0133  |
| 9  | 1.6636                    | -0.7889 | 0.0000  | -0.3269 | -0.0129 | -0.2102 | -0.4222  | -0.1904 | -0.3007 | -0.6406 | -0.8642 | -0.1870 |

Dipole moment (in D) 1.27 (DEN) 2.04 0.39 1.20 1.41 1.61 1.27 3.51 2.75 1.53

-----  
File TZVPMol348.out

Molecule PMol348 1,1,1-trifluorodisilane

SP Mol348 B3LYP/Def2TZVP VAC.

0 8

Dipole 2.1198 -0.0006 0.0000 2.1198

Quadrupole 1.3404 -0.6697 -0.6707 -0.0013 0.0000 0.0000

|    | Atomic coordinates (in A) |         |         | Mul.    | Lowdin  | Hirsch. | I-Hirsch | CM5     | ESP     | NPA     | AIM     | ACP     |
|----|---------------------------|---------|---------|---------|---------|---------|----------|---------|---------|---------|---------|---------|
| 14 | -0.4282                   | -0.0002 | 0.0000  | 0.8918  | -0.2242 | 0.4996  | 1.6694   | 0.4235  | 0.7178  | 2.0274  | 2.0500  | 0.4673  |
| 14 | 1.8936                    | 0.0004  | 0.0000  | 0.0635  | 0.1651  | 0.2499  | 0.3602   | 0.0036  | 0.4448  | 0.2635  | 2.4628  | -0.0075 |
| 1  | 2.3654                    | 0.6990  | 1.2092  | -0.0260 | -0.0284 | -0.0589 | -0.1573  | 0.0244  | -0.1258 | -0.1202 | -0.6520 | 0.0223  |
| 1  | 2.3670                    | -1.3955 | 0.0000  | -0.0260 | -0.0284 | -0.0589 | -0.1572  | 0.0244  | -0.1228 | -0.1202 | -0.6520 | 0.0223  |
| 1  | 2.3654                    | 0.6990  | -1.2092 | -0.0260 | -0.0284 | -0.0589 | -0.1573  | 0.0244  | -0.1258 | -0.1202 | -0.6520 | 0.0223  |
| 9  | -1.0227                   | 1.4624  | 0.0000  | -0.2924 | 0.0481  | -0.1909 | -0.5193  | -0.1667 | -0.2589 | -0.6434 | -0.8522 | -0.1756 |
| 9  | -1.0227                   | -0.7315 | -1.2667 | -0.2924 | 0.0481  | -0.1909 | -0.5193  | -0.1667 | -0.2647 | -0.6434 | -0.8522 | -0.1756 |
| 9  | -1.0227                   | -0.7315 | 1.2667  | -0.2924 | 0.0481  | -0.1909 | -0.5193  | -0.1667 | -0.2647 | -0.6434 | -0.8522 | -0.1756 |

Dipole moment (in D) 2.12 (DEN) 2.16 0.29 2.05 2.13 2.45 2.19 3.61 8.51 2.32

-----  
File TZVPMol349.out

Molecule PMol349 chlorosilane

SP Mol349 B3LYP/Def2TZVP VAC.

0 5

Dipole -0.0002 -1.2286 0.0000 1.2286

Quadrupole -0.2818 0.5638 -0.2820 0.0002 0.0000 0.0000

|                      | Atomic coordinates (in A) |         |            | Mul.    | Lowdin  | Hirsch. | I-Hirsch | CM5     | ESP     | NPA     | AIM     | ACP     |
|----------------------|---------------------------|---------|------------|---------|---------|---------|----------|---------|---------|---------|---------|---------|
| 14                   | -0.0000                   | -0.9820 | 0.0000     | 0.3770  | -0.0461 | 0.3406  | 1.1393   | 0.0496  | 0.6065  | 0.8829  | 2.7615  | 0.0686  |
| 1                    | -1.3939                   | -1.4498 | 0.0000     | -0.0414 | -0.0518 | -0.0685 | -0.2720  | 0.0150  | -0.1260 | -0.1718 | -0.6649 | 0.0127  |
| 1                    | 0.6970                    | -1.4499 | 1.2071     | -0.0414 | -0.0518 | -0.0685 | -0.2720  | 0.0150  | -0.1264 | -0.1718 | -0.6649 | 0.0127  |
| 1                    | 0.6970                    | -1.4499 | -1.2071    | -0.0414 | -0.0518 | -0.0685 | -0.2720  | 0.0150  | -0.1264 | -0.1718 | -0.6649 | 0.0127  |
| 17                   | -0.0000                   | 1.0645  | 0.0000     | -0.2529 | 0.2015  | -0.1350 | -0.3233  | -0.0946 | -0.2276 | -0.3676 | -0.7676 | -0.1066 |
| Dipole mement (in D) |                           |         | 1.23 (DEN) | 2.21    | 2.33    | 0.86    | 1.34     | 1.03    | 1.39    | 2.46    | 3.06    | 1.13    |

-----  
File TZVPMol350.out

Molecule PMol350 dichlorosilane

SP Mol350 B3LYP/Def2TZVP VAC.

0 5

|            |        |         |        |        |        |        |  |
|------------|--------|---------|--------|--------|--------|--------|--|
| Dipole     | 0.0000 | 0.0000  | 1.1209 | 1.1209 |        |        |  |
| Quadrupole | 0.1626 | -1.5125 | 1.3499 | 0.0000 | 0.0000 | 0.0000 |  |

|                      | Atomic coordinates (in A) |         |            | Mul.    | Lowdin  | Hirsch. | I-Hirsch | CM5     | ESP     | NPA     | AIM     | ACP     |
|----------------------|---------------------------|---------|------------|---------|---------|---------|----------|---------|---------|---------|---------|---------|
| 14                   | 0.0000                    | 0.0000  | 0.7595     | 0.5076  | -0.3818 | 0.3586  | 1.2538   | 0.1016  | 0.4867  | 1.0608  | 2.8227  | 0.1540  |
| 1                    | 1.2183                    | 0.0000  | 1.5732     | -0.0331 | -0.0502 | -0.0629 | -0.2953  | 0.0228  | -0.0742 | -0.1771 | -0.6556 | 0.0152  |
| 1                    | -1.2183                   | 0.0000  | 1.5732     | -0.0331 | -0.0502 | -0.0629 | -0.2953  | 0.0228  | -0.0766 | -0.1771 | -0.6556 | 0.0152  |
| 17                   | 0.0000                    | 1.6680  | -0.4053    | -0.2207 | 0.2411  | -0.1164 | -0.3316  | -0.0737 | -0.1680 | -0.3533 | -0.7558 | -0.0922 |
| 17                   | 0.0000                    | -1.6680 | -0.4053    | -0.2207 | 0.2411  | -0.1164 | -0.3316  | -0.0737 | -0.1680 | -0.3533 | -0.7558 | -0.0922 |
| Dipole mement (in D) |                           |         | 1.12 (DEN) | 2.21    | 3.09    | 0.81    | 1.40     | 1.00    | 1.29    | 2.57    | 3.33    | 1.15    |

-----  
File TZVPMol351.out

Molecule PMol351 trichlorosilane

SP Mol351 B3LYP/Def2TZVP VAC.

0 5

|            |        |         |         |        |        |        |  |
|------------|--------|---------|---------|--------|--------|--------|--|
| Dipole     | 0.6200 | 0.4363  | 0.0000  | 0.7581 |        |        |  |
| Quadrupole | 0.5823 | -0.0040 | -0.5782 | 0.8168 | 0.0000 | 0.0000 |  |

|                      | Atomic coordinates (in A) |         |            | Mul.    | Lowdin  | Hirsch. | I-Hirsch | CM5     | ESP     | NPA     | AIM     | ACP     |
|----------------------|---------------------------|---------|------------|---------|---------|---------|----------|---------|---------|---------|---------|---------|
| 14                   | 0.4065                    | 0.2861  | 0.0000     | 0.6015  | -0.7730 | 0.3611  | 1.3551   | 0.1382  | 0.2816  | 1.2117  | 2.8775  | 0.2272  |
| 17                   | -1.2419                   | 1.4620  | 0.0000     | -0.1925 | 0.2735  | -0.1017 | -0.3455  | -0.0568 | -0.0943 | -0.3453 | -0.7449 | -0.0821 |
| 17                   | 0.4065                    | -0.8819 | 1.6540     | -0.1924 | 0.2736  | -0.1017 | -0.3455  | -0.0568 | -0.0938 | -0.3453 | -0.7449 | -0.0821 |
| 17                   | 0.4065                    | -0.8819 | -1.6540    | -0.1924 | 0.2736  | -0.1017 | -0.3455  | -0.0568 | -0.0938 | -0.3453 | -0.7449 | -0.0821 |
| 1                    | 1.5992                    | 1.1256  | 0.0000     | -0.0242 | -0.0477 | -0.0559 | -0.3184  | 0.0323  | 0.0002  | -0.1757 | -0.6428 | 0.0193  |
| Dipole mement (in D) |                           |         | 0.76 (DEN) | 1.69    | 2.98    | 0.59    | 1.11     | 0.78    | 0.91    | 2.11    | 2.71    | 0.93    |

-----  
File TZVPMol352.out

Molecule PMol352 chloro(methyl)silane

SP Mol352 B3LYP/Def2TZVP VAC.

0 8

|            |         |         |         |        |        |        |  |
|------------|---------|---------|---------|--------|--------|--------|--|
| Dipole     | -1.8240 | -0.0117 | 0.0000  | 1.8240 |        |        |  |
| Quadrupole | 0.2625  | -0.0671 | -0.1955 | 0.2109 | 0.0000 | 0.0000 |  |

|                      | Atomic coordinates (in A) |         |            | Mul.    | Lowdin  | Hirsch. | I-Hirsch | CM5     | ESP     | NPA     | AIM     | ACP     |
|----------------------|---------------------------|---------|------------|---------|---------|---------|----------|---------|---------|---------|---------|---------|
| 14                   | -0.4402                   | 0.6229  | 0.0000     | 0.4371  | -0.0322 | 0.3499  | 1.3377   | 0.0843  | 0.6323  | 1.1344  | 2.7894  | 0.1109  |
| 1                    | -0.5114                   | 1.4705  | -1.2024    | -0.0530 | -0.0453 | -0.0771 | -0.3086  | 0.0067  | -0.1513 | -0.1874 | -0.6731 | 0.0003  |
| 17                   | 1.4062                    | -0.2829 | -0.0000    | -0.2718 | 0.2008  | -0.1499 | -0.3475  | -0.1103 | -0.2463 | -0.3820 | -0.7738 | -0.1256 |
| 1                    | -0.5113                   | 1.4703  | 1.2026     | -0.0530 | -0.0453 | -0.0771 | -0.3086  | 0.0067  | -0.1513 | -0.1875 | -0.6731 | 0.0003  |
| 6                    | -1.7640                   | -0.6707 | 0.0000     | -0.4465 | -0.4681 | -0.1739 | -0.8846  | -0.2812 | -0.3276 | -1.1004 | -0.7604 | -0.2883 |
| 1                    | -1.6917                   | -1.3077 | -0.8797    | 0.1317  | 0.1301  | 0.0429  | 0.1706   | 0.0982  | 0.0776  | 0.2421  | 0.0325  | 0.1002  |
| 1                    | -2.7525                   | -0.2117 | 0.0001     | 0.1239  | 0.1300  | 0.0424  | 0.1703   | 0.0974  | 0.0891  | 0.2388  | 0.0255  | 0.1018  |
| 1                    | -1.6917                   | -1.3078 | 0.8797     | 0.1317  | 0.1301  | 0.0429  | 0.1706   | 0.0982  | 0.0776  | 0.2421  | 0.0325  | 0.1002  |
| Dipole mement (in D) |                           |         | 1.82 (DEN) | 2.56    | 2.19    | 1.17    | 1.35     | 1.46    | 1.92    | 2.38    | 2.94    | 1.62    |

-----  
File TZVPMol353.out

Molecule PMol353 trichloro(methyl)silane

SP Mol353 B3LYP/Def2TZVP VAC.

0 8

|                      | Atomic coordinates (in A) |         |            | Mul.    | Lowdin  | Hirsch. | I-Hirsch | CM5     | ESP     | NPA     | AIM     | ACP     |
|----------------------|---------------------------|---------|------------|---------|---------|---------|----------|---------|---------|---------|---------|---------|
| Dipole               | -0.0013                   | 0.0004  | 1.9065     | 1.9065  |         |         |          |         |         |         |         |         |
| Quadrupole           | -1.2897                   | -1.2907 | 2.5804     | -0.0006 | -0.0005 | 0.0025  |          |         |         |         |         |         |
| 14                   | -0.0002                   | 0.0000  | 0.2541     | 0.6519  | -0.7822 | 0.3743  | 1.5934   | 0.1777  | 0.3872  | 1.4567  | 2.8906  | 0.2823  |
| 6                    | -0.0005                   | 0.0014  | 2.0898     | -0.4298 | -0.4455 | -0.1725 | -1.0283  | -0.2771 | -0.3469 | -1.1401 | -0.7745 | -0.2913 |
| 1                    | 1.0188                    | 0.0195  | 2.4709     | 0.1372  | 0.1369  | 0.0490  | 0.1904   | 0.1052  | 0.1162  | 0.2511  | 0.0454  | 0.1046  |
| 1                    | -0.5255                   | 0.8756  | 2.4700     | 0.1372  | 0.1369  | 0.0490  | 0.1904   | 0.1052  | 0.1178  | 0.2511  | 0.0454  | 0.1046  |
| 1                    | -0.4948                   | -0.8899 | 2.4715     | 0.1372  | 0.1369  | 0.0490  | 0.1904   | 0.1051  | 0.1136  | 0.2511  | 0.0454  | 0.1046  |
| 17                   | 0.9155                    | 1.6700  | -0.4615    | -0.2113 | 0.2723  | -0.1163 | -0.3788  | -0.0720 | -0.1297 | -0.3567 | -0.7510 | -0.1016 |
| 17                   | -1.9043                   | -0.0428 | -0.4612    | -0.2112 | 0.2724  | -0.1162 | -0.3788  | -0.0720 | -0.1297 | -0.3566 | -0.7510 | -0.1016 |
| 17                   | 0.9892                    | -1.6280 | -0.4602    | -0.2112 | 0.2723  | -0.1163 | -0.3788  | -0.0720 | -0.1285 | -0.3567 | -0.7510 | -0.1016 |
| Dipole mement (in D) |                           |         | 1.91 (DEN) | 2.77    | 2.36    | 1.24    | 0.92     | 1.66    | 1.97    | 1.64    | 2.36    | 1.82    |

-----  
File TZVPMol354.out

Molecule PMol354 (chloromethyl)silane

SP Mol354 B3LYP/Def2TZVP VAC.

0 8

|            | Atomic coordinates (in A) |         |         | Mul.    | Lowdin  | Hirsch. | I-Hirsch | CM5     | ESP     | NPA     | AIM     | ACP     |
|------------|---------------------------|---------|---------|---------|---------|---------|----------|---------|---------|---------|---------|---------|
| Dipole     | 1.2406                    | 1.1195  | 0.0000  | 1.6710  |         |         |          |         |         |         |         |         |
| Quadrupole | -2.0271                   | 1.5377  | 0.4894  | 0.0846  | 0.0000  | 0.0000  |          |         |         |         |         |         |
| 14         | 1.4633                    | -0.3321 | 0.0000  | 0.2567  | 0.2460  | 0.3098  | 1.1379   | 0.0129  | 0.7343  | 0.8934  | 2.7259  | 0.0029  |
| 1          | 1.4073                    | -1.1745 | 1.2070  | -0.0415 | -0.0388 | -0.0725 | -0.2714  | 0.0105  | -0.1707 | -0.1617 | -0.6686 | 0.0058  |
| 1          | 2.7123                    | 0.4582  | 0.0000  | -0.0575 | -0.0427 | -0.0778 | -0.2715  | 0.0040  | -0.1880 | -0.1731 | -0.6764 | 0.0025  |
| 1          | 1.4073                    | -1.1745 | -1.2070 | -0.0415 | -0.0388 | -0.0725 | -0.2714  | 0.0105  | -0.1707 | -0.1617 | -0.6686 | 0.0058  |
| 6          | 0.0000                    | 0.8473  | 0.0000  | -0.2325 | -0.6289 | -0.0933 | -0.6233  | -0.1567 | -0.4102 | -0.7977 | -0.5478 | -0.0951 |
| 1          | -0.0175                   | 1.4902  | 0.8773  | 0.1361  | 0.1227  | 0.0475  | 0.1513   | 0.1057  | 0.1687  | 0.2306  | 0.0574  | 0.1038  |
| 1          | -0.0175                   | 1.4902  | -0.8773 | 0.1361  | 0.1227  | 0.0475  | 0.1513   | 0.1057  | 0.1687  | 0.2306  | 0.0574  | 0.1038  |
| 17         | -1.5281                   | -0.0896 | 0.0000  | -0.1557 | 0.2577  | -0.0887 | -0.0031  | -0.0928 | -0.1322 | -0.0605 | -0.2788 | -0.1297 |

Dipole mement (in D) 1.67 (DEN) 1.90 1.59 0.96 0.84 1.23 1.77 2.25 3.37 1.53

-----  
File TZVPMol355.out

Molecule PMol355 dichloro(ethyl)silane  
SP Mol355 B3LYP/Def2TZVP VAC.

0 11

Dipole 1.6389 -1.2442 0.1764 2.0652

Quadrupole -0.2509 -0.4784 0.7293 -1.5662 -0.2872 -0.0030

|    | Atomic coordinates (in A) |         |         | Mul.    | Lowdin  | Hirsch. | I-Hirsch | CM5     | ESP     | NPA     | AIM     | ACP     |
|----|---------------------------|---------|---------|---------|---------|---------|----------|---------|---------|---------|---------|---------|
| 6  | 2.6056                    | -0.7405 | 0.0116  | -0.3467 | -0.3213 | -0.0786 | -0.2679  | -0.2256 | -0.0862 | -0.5920 | 0.0152  | -0.2378 |
| 1  | 2.8221                    | 0.2786  | -0.3070 | 0.1245  | 0.1200  | 0.0305  | 0.1083   | 0.0838  | 0.0238  | 0.2090  | 0.0114  | 0.0781  |
| 1  | 2.7757                    | -0.7839 | 1.0876  | 0.1135  | 0.1195  | 0.0326  | 0.1105   | 0.0853  | 0.0282  | 0.2008  | -0.0008 | 0.0858  |
| 1  | 3.3431                    | -1.3910 | -0.4563 | 0.1199  | 0.1184  | 0.0347  | 0.1196   | 0.0862  | 0.0261  | 0.2102  | 0.0072  | 0.0884  |
| 6  | 1.1846                    | -1.1516 | -0.3549 | -0.2698 | -0.4189 | -0.1337 | -0.7564  | -0.2013 | 0.0635  | -0.8820 | -0.7198 | -0.1823 |
| 1  | 0.9906                    | -2.1877 | -0.0656 | 0.1133  | 0.1460  | 0.0404  | 0.1519   | 0.0995  | 0.0071  | 0.2349  | 0.0186  | 0.0949  |
| 1  | 1.0339                    | -1.1155 | -1.4360 | 0.1165  | 0.1463  | 0.0409  | 0.1524   | 0.1003  | 0.0018  | 0.2383  | 0.0251  | 0.0935  |
| 14 | -0.1254                   | -0.1088 | 0.4357  | 0.5498  | -0.3540 | 0.3618  | 1.4319   | 0.1310  | 0.2996  | 1.3043  | 2.8272  | 0.1938  |
| 1  | -0.0718                   | -0.1287 | 1.9032  | -0.0458 | -0.0409 | -0.0707 | -0.3368  | 0.0153  | -0.0526 | -0.1908 | -0.6612 | 0.0027  |
| 17 | 0.0996                    | 1.8395  | -0.1488 | -0.2409 | 0.2411  | -0.1278 | -0.3528  | -0.0864 | -0.1529 | -0.3689 | -0.7610 | -0.1069 |
| 17 | -1.9748                   | -0.7687 | -0.1316 | -0.2344 | 0.2437  | -0.1300 | -0.3606  | -0.0880 | -0.1584 | -0.3636 | -0.7631 | -0.1100 |

Dipole mement (in D) 2.07 (DEN) 2.85 2.86 1.30 1.55 1.70 2.15 2.29 3.08 1.81

-----  
File TZVPMol356.out

Molecule PMol356 chlorotrimethylsilane  
SP Mol356 B3LYP/Def2TZVP VAC.

0 14

Dipole 2.1403 -0.0004 -0.0011 2.1403

Quadrupole -1.6668 0.8336 0.8332 0.0003 0.0001 -0.0002

|    | Atomic coordinates (in A) |         |         | Mul.    | Lowdin  | Hirsch. | I-Hirsch | CM5     | ESP     | NPA     | AIM     | ACP     |
|----|---------------------------|---------|---------|---------|---------|---------|----------|---------|---------|---------|---------|---------|
| 6  | 0.8866                    | 1.5945  | -0.7730 | -0.4442 | -0.4296 | -0.1812 | -0.9665  | -0.2882 | -0.5624 | -1.1192 | -0.7457 | -0.3004 |
| 14 | 0.3310                    | -0.0001 | -0.0001 | 0.5259  | -0.0743 | 0.3822  | 1.7307   | 0.1672  | 0.8149  | 1.6389  | 2.8451  | 0.2183  |
| 6  | 0.8859                    | -1.4667 | -0.9946 | -0.4440 | -0.4296 | -0.1811 | -0.9665  | -0.2881 | -0.5521 | -1.1193 | -0.7459 | -0.3004 |
| 6  | 0.8873                    | -0.1281 | 1.7670  | -0.4442 | -0.4296 | -0.1812 | -0.9664  | -0.2881 | -0.5213 | -1.1192 | -0.7457 | -0.3004 |
| 17 | -1.7447                   | 0.0002  | 0.0005  | -0.2946 | 0.2036  | -0.1721 | -0.3867  | -0.1337 | -0.2927 | -0.4081 | -0.7827 | -0.1574 |
| 1  | 0.5228                    | 1.6894  | -1.7952 | 0.1260  | 0.1294  | 0.0377  | 0.1730   | 0.0931  | 0.1257  | 0.2387  | 0.0233  | 0.0935  |
| 1  | 0.5238                    | 2.4556  | -0.2134 | 0.1260  | 0.1294  | 0.0377  | 0.1730   | 0.0931  | 0.1253  | 0.2386  | 0.0233  | 0.0935  |
| 1  | 1.9754                    | 1.6547  | -0.8029 | 0.1151  | 0.1277  | 0.0357  | 0.1724   | 0.0908  | 0.1337  | 0.2317  | 0.0122  | 0.0931  |
| 1  | 0.5227                    | -2.3993 | -0.5649 | 0.1260  | 0.1294  | 0.0377  | 0.1731   | 0.0931  | 0.1233  | 0.2387  | 0.0233  | 0.0935  |
| 1  | 1.9747                    | -1.5224 | -1.0329 | 0.1150  | 0.1277  | 0.0357  | 0.1724   | 0.0908  | 0.1301  | 0.2317  | 0.0122  | 0.0931  |
| 1  | 0.5220                    | -1.4131 | -2.0198 | 0.1260  | 0.1294  | 0.0377  | 0.1730   | 0.0931  | 0.1235  | 0.2386  | 0.0233  | 0.0935  |
| 1  | 0.5243                    | -1.0429 | 2.2334  | 0.1260  | 0.1294  | 0.0377  | 0.1730   | 0.0931  | 0.1143  | 0.2386  | 0.0232  | 0.0935  |
| 1  | 0.5243                    | 0.7101  | 2.3603  | 0.1260  | 0.1294  | 0.0377  | 0.1730   | 0.0931  | 0.1145  | 0.2386  | 0.0233  | 0.0935  |
| 1  | 1.9762                    | -0.1328 | 1.8333  | 0.1150  | 0.1277  | 0.0357  | 0.1724   | 0.0908  | 0.1232  | 0.2317  | 0.0122  | 0.0931  |

Dipole mement (in D) 2.14 (DEN) 2.81 1.73 1.32 1.16 1.69 2.28 1.92 2.25 1.89



-----  
File TZVPMol357.out

Molecule PMol357 dichloromethylsilane

SP Mol357 B3LYP/Def2TZVP VAC.

0 8

Dipole 0.0000 1.9383 0.2618 1.9559

Quadrupole -2.1531 1.7887 0.3644 0.0000 0.0000 0.0746

|    | Atomic coordinates (in A) |         |         | Mul.    | Lowdin  | Hirsch. | I-Hirsch | CM5     | ESP     | NPA     | AIM     | ACP     |
|----|---------------------------|---------|---------|---------|---------|---------|----------|---------|---------|---------|---------|---------|
| 14 | 0.0000                    | 0.3217  | 0.4525  | 0.5580  | -0.3830 | 0.3673  | 1.4697   | 0.1358  | 0.4732  | 1.3027  | 2.8424  | 0.2002  |
| 1  | -0.0000                   | 0.3362  | 1.9192  | -0.0442 | -0.0424 | -0.0701 | -0.3356  | 0.0161  | -0.0893 | -0.1893 | -0.6621 | 0.0042  |
| 17 | 1.6631                    | -0.7036 | -0.1495 | -0.2395 | 0.2404  | -0.1310 | -0.3589  | -0.0890 | -0.1814 | -0.3655 | -0.7622 | -0.1114 |
| 17 | -1.6631                   | -0.7036 | -0.1495 | -0.2395 | 0.2404  | -0.1310 | -0.3589  | -0.0890 | -0.1817 | -0.3655 | -0.7622 | -0.1114 |
| 6  | -0.0000                   | 2.0029  | -0.2997 | -0.4346 | -0.4568 | -0.1740 | -0.9618  | -0.2797 | -0.2557 | -1.1227 | -0.7718 | -0.2905 |
| 1  | 0.8828                    | 2.5627  | 0.0056  | 0.1317  | 0.1334  | 0.0460  | 0.1817   | 0.1015  | 0.0834  | 0.2454  | 0.0362  | 0.1034  |
| 1  | -0.8826                   | 2.5629  | 0.0061  | 0.1317  | 0.1334  | 0.0460  | 0.1817   | 0.1015  | 0.0810  | 0.2454  | 0.0362  | 0.1034  |
| 1  | -0.0003                   | 1.9389  | -1.3862 | 0.1365  | 0.1347  | 0.0468  | 0.1821   | 0.1027  | 0.0705  | 0.2495  | 0.0432  | 0.1020  |

Dipole mement (in D) 1.96 (DEN) 2.88 2.80 1.27 1.34 1.63 2.07 2.35 3.08 1.81

-----  
File TZVPMol358.out

Molecule PMol358 trichlorofluorosilane

SP Mol358 B3LYP/Def2TZVP VAC.

0 5

Dipole -0.2282 -0.5274 0.0000 0.5747

Quadrupole 0.4278 -1.2455 0.8177 -0.8954 0.0000 0.0000

|    | Atomic coordinates (in A) |         |         | Mul.    | Lowdin  | Hirsch. | I-Hirsch | CM5     | ESP     | NPA     | AIM     | ACP     |
|----|---------------------------|---------|---------|---------|---------|---------|----------|---------|---------|---------|---------|---------|
| 14 | 0.0957                    | 0.2203  | 0.0000  | 0.7694  | -0.9903 | 0.4304  | 1.7483   | 0.2623  | 0.3730  | 1.6678  | 3.0550  | 0.3699  |
| 17 | -1.9043                   | 0.4057  | 0.0000  | -0.1694 | 0.3125  | -0.0825 | -0.4051  | -0.0339 | -0.0731 | -0.3485 | -0.7359 | -0.0676 |
| 17 | 0.7217                    | -0.7336 | 1.6529  | -0.1693 | 0.3126  | -0.0825 | -0.4051  | -0.0338 | -0.0717 | -0.3484 | -0.7358 | -0.0675 |
| 17 | 0.7217                    | -0.7336 | -1.6529 | -0.1693 | 0.3126  | -0.0825 | -0.4051  | -0.0338 | -0.0717 | -0.3484 | -0.7358 | -0.0675 |
| 9  | 0.7217                    | 1.6625  | 0.0000  | -0.2614 | 0.0525  | -0.1830 | -0.5329  | -0.1607 | -0.1566 | -0.6225 | -0.8472 | -0.1673 |

Dipole mement (in D) 0.57 (DEN) 0.45 2.42 0.64 0.37 0.91 0.53 1.56 0.24 0.65

-----  
File TZVPMol359.out

Molecule PMol359 iodomethylsilane

SP Mol359 B3LYP/Def2SVP VAC.

0 8

Dipole -0.4107 -1.9122 0.0000 1.9558

Quadrupole -1.4120 3.2177 -1.8058 0.4499 0.0000 0.0000

|   | Atomic coordinates (in A) |         |         | Mul.    | Lowdin  | Hirsch. | I-Hirsch | CM5     | ESP     | NPA     | AIM     | ACP     |
|---|---------------------------|---------|---------|---------|---------|---------|----------|---------|---------|---------|---------|---------|
| 6 | -1.0246                   | -2.5004 | 0.0000  | -0.2257 | -0.2483 | -0.1699 | -0.8429  | -0.2783 | -0.1657 | -1.1315 | -0.7577 | -0.2843 |
| 1 | 1.3474                    | -1.7640 | 1.2011  | -0.0686 | -0.0953 | -0.0763 | -0.3003  | 0.0068  | -0.0992 | -0.1653 | -0.6673 | 0.0042  |
| 1 | 1.3474                    | -1.7640 | -1.2011 | -0.0686 | -0.0953 | -0.0763 | -0.3003  | 0.0068  | -0.0992 | -0.1653 | -0.6673 | 0.0042  |
| 1 | -0.7914                   | -3.5656 | 0.0000  | 0.0514  | 0.0405  | 0.0414  | 0.1625   | 0.0963  | 0.0710  | 0.2481  | 0.0273  | 0.1026  |

|    |         |         |         |         |         |         |         |         |         |         |         |         |
|----|---------|---------|---------|---------|---------|---------|---------|---------|---------|---------|---------|---------|
| 1  | -1.6296 | -2.2893 | 0.8796  | 0.0578  | 0.0406  | 0.0400  | 0.1597  | 0.0952  | 0.0383  | 0.2507  | 0.0343  | 0.0998  |
| 1  | -1.6296 | -2.2893 | -0.8796 | 0.0578  | 0.0406  | 0.0400  | 0.1597  | 0.0952  | 0.0383  | 0.2507  | 0.0342  | 0.0998  |
| 53 | 0.0000  | 0.8984  | 0.0000  | -0.2175 | -0.0927 | -0.1376 | -0.2866 | -0.0747 | -0.1899 | -0.2332 | -0.5916 | -0.0679 |
| 14 | 0.5359  | -1.4959 | 0.0000  | 0.4133  | 0.4099  | 0.3387  | 1.2483  | 0.0528  | 0.4064  | 0.9457  | 2.5884  | 0.0416  |

Dipole mement (in D) 1.96 (DEN) 2.20 0.42 1.28 1.34 1.24 2.15 1.54 2.26 1.26

-----

File TZVPMol360.out

Molecule PMol360 phosphine

SP Mol360 B3LYP/Def2TZVP VAC.

0 4

Dipole 0.0001 -0.6168 0.0000 0.6168

Quadrupole 0.7201 -1.4393 0.7192 0.0004 0.0000 0.0000

|    | Atomic coordinates (in A) |         |         | Mul.    | Lowdin  | Hirsch. | I-Hirsch | CM5     | ESP     | NPA     | AIM     | ACP     |
|----|---------------------------|---------|---------|---------|---------|---------|----------|---------|---------|---------|---------|---------|
| 15 | 0.0000                    | 0.1292  | 0.0000  | -0.1655 | 0.0154  | 0.0401  | 0.1063   | -0.2019 | -0.1685 | 0.0248  | 1.5227  | -0.2310 |
| 1  | 1.1812                    | -0.6460 | 0.0000  | 0.0551  | -0.0051 | -0.0133 | -0.0354  | 0.0673  | 0.0549  | -0.0082 | -0.5075 | 0.0770  |
| 1  | -0.5906                   | -0.6462 | 1.0226  | 0.0552  | -0.0051 | -0.0134 | -0.0354  | 0.0673  | 0.0568  | -0.0083 | -0.5077 | 0.0770  |
| 1  | -0.5906                   | -0.6462 | -1.0226 | 0.0552  | -0.0051 | -0.0134 | -0.0354  | 0.0673  | 0.0568  | -0.0083 | -0.5077 | 0.0770  |

Dipole mement (in D) 0.62 (DEN) 0.62 0.06 0.15 0.40 0.75 0.63 0.09 5.67 0.86

-----

File TZVPMol361.out

Molecule PMol361 methylphosphine

SP Mol361 B3LYP/Def2TZVP VAC.

0 7

Dipole 0.9939 0.0000 0.6150 1.1688

Quadrupole -0.2044 0.9731 -0.7686 0.0000 -1.3102 0.0000

|    | Atomic coordinates (in A) |         |         | Mul.    | Lowdin  | Hirsch. | I-Hirsch | CM5     | ESP     | NPA     | AIM     | ACP     |
|----|---------------------------|---------|---------|---------|---------|---------|----------|---------|---------|---------|---------|---------|
| 15 | -0.6615                   | 0.0000  | -0.1247 | -0.0463 | 0.1971  | 0.0535  | 0.2455   | -0.1562 | -0.2833 | 0.2926  | 1.5136  | -0.1935 |
| 1  | -0.9219                   | -1.0222 | 0.8174  | 0.0292  | -0.0024 | -0.0218 | -0.0554  | 0.0601  | 0.0819  | -0.0354 | -0.5266 | 0.0635  |
| 1  | -0.9219                   | 1.0222  | 0.8174  | 0.0292  | -0.0024 | -0.0218 | -0.0554  | 0.0601  | 0.0819  | -0.0354 | -0.5266 | 0.0635  |
| 6  | 1.1784                    | -0.0000 | 0.0251  | -0.3873 | -0.5216 | -0.1232 | -0.5382  | -0.2401 | 0.0539  | -0.8847 | -0.5298 | -0.2314 |
| 1  | 1.5782                    | 0.8750  | -0.4826 | 0.1239  | 0.1119  | 0.0387  | 0.1351   | 0.0933  | 0.0406  | 0.2223  | 0.0226  | 0.1004  |
| 1  | 1.5782                    | -0.8750 | -0.4826 | 0.1239  | 0.1119  | 0.0387  | 0.1351   | 0.0933  | 0.0406  | 0.2223  | 0.0226  | 0.1004  |
| 1  | 1.5386                    | -0.0000 | 1.0500  | 0.1274  | 0.1054  | 0.0359  | 0.1332   | 0.0896  | -0.0156 | 0.2182  | 0.0239  | 0.0971  |

Dipole mement (in D) 1.17 (DEN) 0.59 1.10 0.28 0.67 0.88 1.13 0.81 5.73 1.16

-----

File TZVPMol362.out

Molecule PMol362 dimethyl\_methylphosphona

SP Mol362 B3LYP/Def2TZVP VAC.

0 16

Dipole 0.5120 -0.2764 -2.1713 2.2479

Quadrupole 5.7983 3.5824 -9.3808 1.4418 -0.8373 -1.1733

|  | Atomic coordinates (in A) |  |  | Mul. | Lowdin | Hirsch. | I-Hirsch | CM5 | ESP | NPA | AIM | ACP |
|--|---------------------------|--|--|------|--------|---------|----------|-----|-----|-----|-----|-----|
|--|---------------------------|--|--|------|--------|---------|----------|-----|-----|-----|-----|-----|

|    |         |         |         |         |         |         |         |         |         |         |         |         |
|----|---------|---------|---------|---------|---------|---------|---------|---------|---------|---------|---------|---------|
| 15 | -0.0001 | 0.3493  | 0.1711  | 0.8009  | 0.2311  | 0.4590  | 2.1297  | 0.4041  | 1.0822  | 2.3816  | 3.5678  | 0.4620  |
| 8  | 0.8642  | -0.6962 | -0.6803 | -0.3574 | 0.0397  | -0.1859 | -0.6588 | -0.2522 | -0.3807 | -0.7984 | -1.3365 | -0.2506 |
| 8  | -1.4375 | 0.1566  | -0.4715 | -0.3403 | 0.0509  | -0.1783 | -0.6392 | -0.2441 | -0.3567 | -0.7881 | -1.3362 | -0.2450 |
| 8  | 0.1144  | 0.1597  | 1.6191  | -0.5351 | -0.2592 | -0.4053 | -0.9840 | -0.4239 | -0.6406 | -1.0948 | -1.5110 | -0.4296 |
| 6  | 2.0960  | -1.1751 | -0.1490 | -0.1664 | -0.3446 | 0.0091  | -0.0387 | -0.1082 | 0.0514  | -0.2505 | 0.4647  | -0.0885 |
| 1  | 2.3615  | -2.0680 | -0.7081 | 0.1221  | 0.1089  | 0.0435  | 0.1005  | 0.1041  | 0.0644  | 0.1851  | 0.0328  | 0.0944  |
| 1  | 2.8871  | -0.4327 | -0.2736 | 0.1050  | 0.1016  | 0.0359  | 0.0844  | 0.0960  | 0.0370  | 0.1659  | 0.0143  | 0.0887  |
| 1  | 1.9964  | -1.4157 | 0.9084  | 0.1453  | 0.1105  | 0.0419  | 0.1063  | 0.1065  | 0.0554  | 0.1973  | 0.0605  | 0.0889  |
| 6  | 0.4320  | 1.9640  | -0.4498 | -0.3804 | -0.4078 | -0.1198 | -0.9127 | -0.2258 | -0.7102 | -1.0328 | -0.6769 | -0.2415 |
| 1  | 1.4736  | 2.1705  | -0.2134 | 0.1288  | 0.1262  | 0.0518  | 0.1814  | 0.1099  | 0.2112  | 0.2397  | 0.0409  | 0.1111  |
| 1  | 0.2939  | 2.0169  | -1.5265 | 0.1360  | 0.1263  | 0.0510  | 0.1889  | 0.1099  | 0.1886  | 0.2438  | 0.0495  | 0.1057  |
| 1  | -0.1836 | 2.7210  | 0.0292  | 0.1375  | 0.1290  | 0.0559  | 0.1917  | 0.1140  | 0.2050  | 0.2486  | 0.0537  | 0.1139  |
| 6  | -2.1909 | -1.0058 | -0.1293 | -0.1845 | -0.3383 | 0.0127  | -0.0471 | -0.1044 | -0.0784 | -0.2534 | 0.4574  | -0.0861 |
| 1  | -1.7441 | -1.8962 | -0.5722 | 0.1228  | 0.1051  | 0.0392  | 0.0912  | 0.1011  | 0.0760  | 0.1774  | 0.0320  | 0.0876  |
| 1  | -2.2457 | -1.1273 | 0.9521  | 0.1401  | 0.1103  | 0.0438  | 0.1018  | 0.1069  | 0.0924  | 0.1907  | 0.0506  | 0.0926  |
| 1  | -3.1894 | -0.8664 | -0.5321 | 0.1257  | 0.1103  | 0.0457  | 0.1048  | 0.1065  | 0.1031  | 0.1879  | 0.0363  | 0.0965  |

Dipole moment (in D) 2.25 (DEN) 1.77 1.87 1.99 2.25 2.06 2.23 2.19 3.23 2.06

-----  
File TZVPMol363.out

Molecule PMol363 hypophosphorous\_acid

SP Mol363 B3LYP/Def2TZVP VAC.

0 6

Dipole -2.3137 1.0137 0.9115 2.6854  
 Quadrupole -4.5595 3.1096 1.4499 4.2698 -1.2671 -1.3671

|    | Atomic coordinates (in A) |         |         | Mul.    | Lowdin  | Hirsch. | I-Hirsch | CM5     | ESP     | NPA     | AIM     | ACP     |
|----|---------------------------|---------|---------|---------|---------|---------|----------|---------|---------|---------|---------|---------|
| 8  | 1.2764                    | -0.5366 | -0.0327 | -0.5030 | -0.2914 | -0.3935 | -0.8621  | -0.4131 | -0.5963 | -1.0502 | -1.4886 | -0.4062 |
| 15 | 0.1204                    | 0.3598  | 0.0184  | 0.6117  | 0.2984  | 0.4253  | 1.6164   | 0.2637  | 0.8078  | 1.7780  | 3.3709  | 0.2670  |
| 8  | -1.3328                   | -0.3015 | -0.0711 | -0.4708 | -0.1538 | -0.2239 | -0.8894  | -0.4084 | -0.6034 | -0.9725 | -1.3703 | -0.3371 |
| 1  | 0.0596                    | 1.1564  | 1.1780  | 0.0076  | -0.0206 | -0.0048 | -0.1929  | 0.0864  | -0.0545 | -0.1358 | -0.5650 | 0.0811  |
| 1  | -0.0265                   | 1.2902  | -1.0221 | 0.0218  | -0.0091 | 0.0050  | -0.1673  | 0.0983  | 0.0001  | -0.1226 | -0.5584 | 0.0897  |
| 1  | -1.3880                   | -1.1383 | 0.3992  | 0.3328  | 0.1765  | 0.1919  | 0.4953   | 0.3730  | 0.4462  | 0.5030  | 0.6111  | 0.3054  |

Dipole moment (in D) 2.69 (DEN) 2.54 1.89 2.31 2.79 2.70 2.71 4.15 3.53 2.70

-----  
File TZVPMol364.out

Molecule PMol364 trimethylphosphine

SP Mol364 B3LYP/Def2TZVP VAC.

0 13

Dipole 0.0002 0.0001 1.1888 1.1888  
 Quadrupole 1.4683 1.4684 -2.9367 -0.0003 -0.0002 0.0004

|    | Atomic coordinates (in A) |        |         | Mul.    | Lowdin  | Hirsch. | I-Hirsch | CM5     | ESP     | NPA     | AIM     | ACP     |
|----|---------------------------|--------|---------|---------|---------|---------|----------|---------|---------|---------|---------|---------|
| 15 | 0.0000                    | 0.0001 | -0.6057 | 0.1754  | 0.4490  | 0.0920  | 0.5597   | -0.0577 | -0.2293 | 0.7750  | 1.5349  | -0.0936 |
| 6  | 0.2660                    | 1.5887 | 0.2786  | -0.4069 | -0.4785 | -0.1308 | -0.6004  | -0.2449 | -0.1494 | -0.9124 | -0.5520 | -0.2455 |
| 1  | -0.5031                   | 2.3065 | -0.0022 | 0.1216  | 0.1129  | 0.0355  | 0.1385   | 0.0903  | 0.0803  | 0.2237  | 0.0164  | 0.0952  |
| 1  | 1.2271                    | 2.0167 | -0.0021 | 0.1216  | 0.1129  | 0.0355  | 0.1385   | 0.0903  | 0.0824  | 0.2237  | 0.0164  | 0.0952  |

|   |         |         |         |         |         |         |         |         |         |         |         |         |
|---|---------|---------|---------|---------|---------|---------|---------|---------|---------|---------|---------|---------|
| 1 | 0.2458  | 1.4688  | 1.3636  | 0.1053  | 0.1030  | 0.0291  | 0.1368  | 0.0837  | 0.0562  | 0.2066  | 0.0075  | 0.0863  |
| 6 | -1.5090 | -0.5641 | 0.2783  | -0.4071 | -0.4785 | -0.1307 | -0.6002 | -0.2449 | -0.1357 | -0.9123 | -0.5519 | -0.2455 |
| 1 | -1.7461 | -1.5890 | -0.0027 | 0.1216  | 0.1129  | 0.0355  | 0.1385  | 0.0902  | 0.0779  | 0.2237  | 0.0164  | 0.0952  |
| 1 | -1.3954 | -0.5218 | 1.3634  | 0.1053  | 0.1030  | 0.0291  | 0.1368  | 0.0837  | 0.0543  | 0.2066  | 0.0075  | 0.0863  |
| 1 | -2.3602 | 0.0543  | -0.0024 | 0.1216  | 0.1129  | 0.0355  | 0.1385  | 0.0903  | 0.0791  | 0.2237  | 0.0164  | 0.0952  |
| 6 | 1.2430  | -1.0247 | 0.2782  | -0.4069 | -0.4785 | -0.1308 | -0.6004 | -0.2449 | -0.0835 | -0.9123 | -0.5517 | -0.2455 |
| 1 | 1.1500  | -0.9471 | 1.3632  | 0.1052  | 0.1030  | 0.0291  | 0.1368  | 0.0837  | 0.0376  | 0.2066  | 0.0075  | 0.0863  |
| 1 | 1.1328  | -2.0711 | -0.0023 | 0.1216  | 0.1129  | 0.0355  | 0.1385  | 0.0903  | 0.0633  | 0.2237  | 0.0164  | 0.0952  |
| 1 | 2.2491  | -0.7179 | -0.0033 | 0.1216  | 0.1129  | 0.0355  | 0.1385  | 0.0903  | 0.0669  | 0.2237  | 0.0164  | 0.0952  |

Dipole moment (in D) 1.19 (DEN) 0.08 1.21 0.22 1.36 0.82 1.14 1.87 6.53 0.98

-----  
 File TZVPMol365.out  
 Molecule PMol365 dimethylphosphine  
 SP Mol365 B3LYP/Def2TZVP VAC.  
 0 10

|            |                           |         |         |         |         |         |          |         |         |         |         |         |
|------------|---------------------------|---------|---------|---------|---------|---------|----------|---------|---------|---------|---------|---------|
| Dipole     | -0.3871                   | 1.2018  | 0.0000  | 1.2626  |         |         |          |         |         |         |         |         |
| Quadrupole | 0.1678                    | -1.8061 | 1.6383  | 1.3392  | 0.0000  | 0.0000  |          |         |         |         |         |         |
|            | Atomic coordinates (in A) |         |         | Mul.    | Lowdin  | Hirsch. | I-Hirsch | CM5     | ESP     | NPA     | AIM     | ACP     |
| 15         | 0.0375                    | -0.6651 | 0.0000  | 0.0754  | 0.3414  | 0.0715  | 0.3955   | -0.1076 | -0.2952 | 0.5450  | 1.5208  | -0.1470 |
| 1          | -1.3539                   | -0.9272 | 0.0000  | 0.0033  | 0.0020  | -0.0281 | -0.0743  | 0.0552  | 0.1087  | -0.0597 | -0.5409 | 0.0516  |
| 6          | 0.0375                    | 0.5250  | 1.4050  | -0.4012 | -0.5004 | -0.1278 | -0.5678  | -0.2433 | -0.0756 | -0.9001 | -0.5425 | -0.2389 |
| 6          | 0.0375                    | 0.5250  | -1.4050 | -0.4012 | -0.5004 | -0.1278 | -0.5678  | -0.2433 | -0.0756 | -0.9001 | -0.5426 | -0.2389 |
| 1          | -0.7039                   | 1.3156  | 1.2994  | 0.1162  | 0.1039  | 0.0322  | 0.1345   | 0.0863  | 0.0317  | 0.2116  | 0.0143  | 0.0914  |
| 1          | -0.1457                   | -0.0006 | 2.3397  | 0.1265  | 0.1126  | 0.0377  | 0.1362   | 0.0922  | 0.0579  | 0.2261  | 0.0215  | 0.0989  |
| 1          | 1.0204                    | 0.9869  | 1.4830  | 0.1192  | 0.1122  | 0.0361  | 0.1365   | 0.0909  | 0.0793  | 0.2198  | 0.0167  | 0.0964  |
| 1          | -0.7039                   | 1.3156  | -1.2994 | 0.1162  | 0.1039  | 0.0322  | 0.1345   | 0.0863  | 0.0317  | 0.2116  | 0.0143  | 0.0914  |
| 1          | 1.0204                    | 0.9869  | -1.4830 | 0.1192  | 0.1122  | 0.0361  | 0.1365   | 0.0909  | 0.0793  | 0.2198  | 0.0167  | 0.0964  |
| 1          | -0.1457                   | -0.0006 | -2.3397 | 0.1265  | 0.1126  | 0.0377  | 0.1362   | 0.0922  | 0.0579  | 0.2261  | 0.0215  | 0.0989  |

Dipole moment (in D) 1.26 (DEN) 0.32 1.25 0.23 1.00 0.87 1.27 1.38 6.06 1.13

-----  
 File TZVPMol366.out  
 Molecule PMol366 PH  
 SP Mol366 B3LYP/Def2TZVP VAC.  
 0 2

|            |                           |         |         |         |         |         |          |         |         |         |         |         |
|------------|---------------------------|---------|---------|---------|---------|---------|----------|---------|---------|---------|---------|---------|
| Dipole     | 0.0000                    | 0.0000  | -0.4536 | 0.4536  |         |         |          |         |         |         |         |         |
| Quadrupole | -0.1104                   | -0.1104 | 0.2208  | 0.0000  | 0.0000  |         |          |         |         |         |         |         |
|            | Atomic coordinates (in A) |         |         | Mul.    | Lowdin  | Hirsch. | I-Hirsch | CM5     | ESP     | NPA     | AIM     | ACP     |
| 15         | 0.0000                    | 0.0000  | 0.0889  | -0.0509 | 0.0381  | 0.0281  | 0.0633   | -0.0507 | -0.0640 | 0.1159  | 0.5210  | -0.0536 |
| 1          | 0.0000                    | 0.0000  | -1.3330 | 0.0509  | -0.0381 | -0.0281 | -0.0633  | 0.0507  | 0.0640  | -0.1159 | -0.5210 | 0.0536  |

Dipole moment (in D) 0.45 (DEN) 0.35 0.26 0.19 0.43 0.35 0.44 0.79 3.56 0.37

-----  
 File TZVPMol367.out

Molecule PMol367 CH2PH2  
SP Mol367 B3LYP/Def2TZVP VAC.

0 6

Dipole -0.2294 0.0002 0.3620 0.4286

Quadrupole 0.4535 1.6745 -2.1280 0.0003 1.4373 -0.0003

|    | Atomic coordinates (in A) |         |         | Mul.    | Lowdin  | Hirsch. | I-Hirsch | CM5     | ESP     | NPA     | AIM     | ACP     |
|----|---------------------------|---------|---------|---------|---------|---------|----------|---------|---------|---------|---------|---------|
| 15 | 0.5760                    | -0.0000 | -0.1231 | 0.0059  | 0.2487  | 0.0799  | 0.2820   | -0.1304 | -0.0943 | 0.3512  | 1.6892  | -0.1684 |
| 6  | -1.1728                   | -0.0000 | 0.0705  | -0.3500 | -0.4667 | -0.1313 | -0.4615  | -0.1945 | -0.4479 | -0.7010 | -0.7848 | -0.1694 |
| 1  | 0.9313                    | -1.0482 | 0.7559  | 0.0423  | 0.0087  | -0.0096 | -0.0415  | 0.0726  | 0.0792  | -0.0204 | -0.5062 | 0.0757  |
| 1  | 0.9312                    | 1.0488  | 0.7551  | 0.0423  | 0.0087  | -0.0096 | -0.0415  | 0.0726  | 0.0792  | -0.0204 | -0.5062 | 0.0757  |
| 1  | -1.7330                   | 0.9177  | -0.0439 | 0.1297  | 0.1003  | 0.0353  | 0.1313   | 0.0898  | 0.1919  | 0.1953  | 0.0539  | 0.0933  |
| 1  | -1.7331                   | -0.9177 | -0.0442 | 0.1297  | 0.1003  | 0.0353  | 0.1312   | 0.0898  | 0.1920  | 0.1953  | 0.0539  | 0.0933  |

Dipole moment (in D) 0.43 (DEN) 0.24 1.75 0.34 1.07 0.51 0.46 1.63 6.17 0.67

-----  
File TZVPMol368.out

Molecule PMol368 CH3CH(PH2)CH3

SP Mol368 B3LYP/Def2TZVP VAC.

0 13

Dipole -1.1465 0.4906 -0.0385 1.2477

Quadrupole -1.4796 0.0334 1.4462 1.7285 0.7529 -0.4907

|    | Atomic coordinates (in A) |         |         | Mul.    | Lowdin  | Hirsch. | I-Hirsch | CM5     | ESP     | NPA     | AIM     | ACP     |
|----|---------------------------|---------|---------|---------|---------|---------|----------|---------|---------|---------|---------|---------|
| 6  | -1.1308                   | -1.2378 | 0.1049  | -0.3402 | -0.3151 | -0.0838 | -0.3592  | -0.2294 | -0.4634 | -0.5989 | 0.0094  | -0.2411 |
| 6  | -0.4180                   | 0.0100  | -0.4006 | -0.0659 | -0.4847 | -0.0454 | -0.0834  | -0.0863 | 0.3778  | -0.4535 | -0.4239 | -0.0133 |
| 6  | -1.0816                   | 1.2750  | 0.1163  | -0.3176 | -0.3136 | -0.0854 | -0.3498  | -0.2321 | -0.5266 | -0.5935 | 0.0184  | -0.2428 |
| 15 | 1.3986                    | -0.1192 | -0.0018 | -0.0565 | 0.2637  | 0.0480  | 0.1815   | -0.1606 | -0.3553 | 0.2910  | 1.4542  | -0.2108 |
| 1  | -0.6877                   | -2.1537 | -0.2840 | 0.1219  | 0.1189  | 0.0306  | 0.1027   | 0.0837  | 0.1192  | 0.2100  | 0.0038  | 0.0854  |
| 1  | -2.1831                   | -1.2295 | -0.1821 | 0.1084  | 0.1193  | 0.0310  | 0.1089   | 0.0830  | 0.0996  | 0.2052  | -0.0011 | 0.0833  |
| 1  | -1.0955                   | -1.2940 | 1.1946  | 0.1057  | 0.1187  | 0.0293  | 0.1055   | 0.0825  | 0.1455  | 0.1980  | -0.0038 | 0.0827  |
| 1  | -0.4620                   | 0.0092  | -1.4941 | 0.0806  | 0.1409  | 0.0332  | 0.0922   | 0.0949  | 0.0476  | 0.2110  | 0.0004  | 0.0892  |
| 1  | -0.6022                   | 2.1755  | -0.2647 | 0.1120  | 0.1165  | 0.0288  | 0.1014   | 0.0815  | 0.1124  | 0.2060  | -0.0011 | 0.0839  |
| 1  | -1.0387                   | 1.3191  | 1.2060  | 0.1019  | 0.1180  | 0.0279  | 0.1036   | 0.0809  | 0.1225  | 0.1992  | -0.0030 | 0.0811  |
| 1  | -2.1355                   | 1.3136  | -0.1692 | 0.1017  | 0.1178  | 0.0279  | 0.1028   | 0.0797  | 0.1329  | 0.1995  | -0.0075 | 0.0796  |
| 1  | 1.7397                    | 1.2242  | -0.2884 | 0.0254  | -0.0009 | -0.0209 | -0.0545  | 0.0614  | 0.0953  | -0.0343 | -0.5239 | 0.0622  |
| 1  | 1.2694                    | 0.1401  | 1.3854  | 0.0228  | 0.0006  | -0.0214 | -0.0517  | 0.0609  | 0.0924  | -0.0398 | -0.5208 | 0.0606  |

Dipole moment (in D) 1.25 (DEN) 0.58 1.45 0.31 0.67 0.94 1.23 0.81 5.63 1.28

-----  
File TZVPMol369.out

Molecule PMol369 CH3PH

SP Mol369 B3LYP/Def2TZVP VAC.

0 6

Dipole -1.2072 0.5206 0.0001 1.3147

Quadrupole -0.3326 0.2124 0.1202 1.0114 0.0001 0.0000

|   | Atomic coordinates (in A) |        |        | Mul.    | Lowdin  | Hirsch. | I-Hirsch | CM5     | ESP    | NPA     | AIM     | ACP     |
|---|---------------------------|--------|--------|---------|---------|---------|----------|---------|--------|---------|---------|---------|
| 6 | -1.1355                   | 0.0121 | 0.0000 | -0.3912 | -0.5493 | -0.1305 | -0.5656  | -0.2447 | 0.1383 | -0.9460 | -0.5600 | -0.2369 |

|    |         |         |         |         |         |         |         |         |         |         |         |         |
|----|---------|---------|---------|---------|---------|---------|---------|---------|---------|---------|---------|---------|
| 15 | 0.6981  | -0.0984 | -0.0000 | -0.0202 | 0.2267  | 0.0422  | 0.2099  | -0.0870 | -0.2166 | 0.3462  | 1.0082  | -0.1156 |
| 1  | -1.5698 | -0.9846 | -0.0000 | 0.1267  | 0.1096  | 0.0377  | 0.1371  | 0.0922  | 0.0157  | 0.2221  | 0.0238  | 0.0993  |
| 1  | -1.5041 | 0.5425  | -0.8779 | 0.1306  | 0.1132  | 0.0404  | 0.1435  | 0.0943  | -0.0057 | 0.2295  | 0.0318  | 0.1011  |
| 1  | -1.5040 | 0.5424  | 0.8780  | 0.1306  | 0.1132  | 0.0404  | 0.1435  | 0.0943  | -0.0057 | 0.2295  | 0.0318  | 0.1011  |
| 1  | 0.9195  | 1.3035  | 0.0001  | 0.0235  | -0.0135 | -0.0302 | -0.0683 | 0.0509  | 0.0740  | -0.0814 | -0.5350 | 0.0510  |

Dipole mement (in D) 1.31 (DEN) 0.71 1.24 0.24 0.60 0.89 1.28 1.13 5.13 1.16

-----  
File TZVPMol370.out  
Molecule PMol370 (CH3)3PH2  
SP Mol370 B3LYP/Def2TZVP VAC.  
0 16

|            |         |        |         |        |        |        |  |  |  |  |  |  |
|------------|---------|--------|---------|--------|--------|--------|--|--|--|--|--|--|
| Dipole     | -1.0898 | 0.0000 | 0.5503  | 1.2209 |        |        |  |  |  |  |  |  |
| Quadrupole | -1.2394 | 1.4465 | -0.2071 | 0.0000 | 1.9022 | 0.0000 |  |  |  |  |  |  |

|    | Atomic coordinates (in A) |         |         | Mul.    | Lowdin  | Hirsch. | I-Hirsch | CM5     | ESP     | NPA     | AIM     | ACP     |
|----|---------------------------|---------|---------|---------|---------|---------|----------|---------|---------|---------|---------|---------|
| 6  | -0.8234                   | -0.0000 | 1.4542  | -0.3223 | -0.2890 | -0.0865 | -0.3893  | -0.2314 | -0.5115 | -0.5964 | 0.0158  | -0.2464 |
| 6  | -0.3502                   | 0.0000  | 0.0059  | 0.0348  | -0.5119 | -0.0117 | 0.1315   | -0.0158 | 0.5955  | -0.2601 | -0.3792 | 0.0938  |
| 6  | -0.8662                   | 1.2484  | -0.7070 | -0.3435 | -0.2906 | -0.0850 | -0.3995  | -0.2286 | -0.4512 | -0.6041 | 0.0048  | -0.2447 |
| 15 | 1.5216                    | -0.0000 | -0.1366 | -0.0626 | 0.2953  | 0.0487  | 0.1812   | -0.1595 | -0.3710 | 0.2939  | 1.4262  | -0.2170 |
| 6  | -0.8662                   | -1.2484 | -0.7070 | -0.3435 | -0.2906 | -0.0850 | -0.3995  | -0.2286 | -0.4512 | -0.6041 | 0.0045  | -0.2447 |
| 1  | -1.9161                   | -0.0000 | 1.5016  | 0.0980  | 0.1200  | 0.0267  | 0.1075   | 0.0792  | 0.1308  | 0.1977  | -0.0099 | 0.0772  |
| 1  | -0.4720                   | 0.8797  | 1.9933  | 0.1088  | 0.1188  | 0.0279  | 0.1062   | 0.0813  | 0.1020  | 0.2048  | -0.0032 | 0.0818  |
| 1  | -0.4720                   | -0.8798 | 1.9933  | 0.1088  | 0.1188  | 0.0279  | 0.1062   | 0.0813  | 0.1020  | 0.2048  | -0.0032 | 0.0818  |
| 1  | -1.9580                   | 1.2705  | -0.6906 | 0.1046  | 0.1219  | 0.0301  | 0.1142   | 0.0828  | 0.0967  | 0.2038  | -0.0030 | 0.0810  |
| 1  | -0.5521                   | 1.2799  | -1.7505 | 0.1196  | 0.1211  | 0.0298  | 0.1079   | 0.0836  | 0.1167  | 0.2087  | 0.0015  | 0.0835  |
| 1  | -0.5151                   | 2.1626  | -0.2267 | 0.1117  | 0.1203  | 0.0298  | 0.1087   | 0.0833  | 0.1228  | 0.2045  | -0.0035 | 0.0836  |
| 1  | 1.7616                    | -1.0255 | 0.8099  | 0.0249  | 0.0013  | -0.0211 | -0.0529  | 0.0615  | 0.0911  | -0.0352 | -0.5232 | 0.0609  |
| 1  | 1.7617                    | 1.0255  | 0.8098  | 0.0249  | 0.0013  | -0.0211 | -0.0529  | 0.0615  | 0.0911  | -0.0352 | -0.5232 | 0.0609  |
| 1  | -0.5521                   | -1.2799 | -1.7505 | 0.1196  | 0.1211  | 0.0298  | 0.1079   | 0.0836  | 0.1167  | 0.2087  | 0.0015  | 0.0835  |
| 1  | -1.9580                   | -1.2704 | -0.6906 | 0.1046  | 0.1219  | 0.0301  | 0.1142   | 0.0828  | 0.0967  | 0.2038  | -0.0030 | 0.0810  |
| 1  | -0.5151                   | -2.1626 | -0.2268 | 0.1117  | 0.1203  | 0.0298  | 0.1087   | 0.0833  | 0.1228  | 0.2045  | -0.0035 | 0.0836  |

Dipole mement (in D) 1.22 (DEN) 0.54 1.45 0.31 0.63 0.94 1.21 0.84 5.56 1.29

-----  
File TZVPMol371.out  
Molecule PMol371 CH3CH(PH)CH3  
SP Mol371 B3LYP/Def2TZVP VAC.  
0 12

|            |         |        |        |         |        |        |  |  |  |  |  |  |
|------------|---------|--------|--------|---------|--------|--------|--|--|--|--|--|--|
| Dipole     | -1.4067 | 0.0000 | 0.0785 | 1.4089  |        |        |  |  |  |  |  |  |
| Quadrupole | -2.0631 | 0.6400 | 1.4231 | -0.0001 | 1.1618 | 0.0000 |  |  |  |  |  |  |

|    | Atomic coordinates (in A) |         |         | Mul.    | Lowdin  | Hirsch. | I-Hirsch | CM5     | ESP     | NPA     | AIM     | ACP     |
|----|---------------------------|---------|---------|---------|---------|---------|----------|---------|---------|---------|---------|---------|
| 6  | -1.0571                   | -1.2582 | 0.1143  | -0.3264 | -0.3138 | -0.0841 | -0.3515  | -0.2300 | -0.4486 | -0.5949 | 0.0117  | -0.2409 |
| 6  | -0.3773                   | 0.0000  | -0.4108 | -0.0655 | -0.5108 | -0.0534 | -0.1031  | -0.0924 | 0.4726  | -0.5088 | -0.4454 | -0.0217 |
| 6  | -1.0571                   | 1.2582  | 0.1143  | -0.3264 | -0.3138 | -0.0841 | -0.3515  | -0.2300 | -0.4485 | -0.5949 | 0.0119  | -0.2409 |
| 15 | 1.4382                    | 0.0000  | -0.0218 | -0.0406 | 0.2967  | 0.0417  | 0.1502   | -0.0866 | -0.2849 | 0.3500  | 0.9496  | -0.1292 |
| 1  | -0.5855                   | -2.1675 | -0.2567 | 0.1186  | 0.1179  | 0.0292  | 0.1009   | 0.0821  | 0.1158  | 0.2083  | 0.0017  | 0.0835  |

|   |         |         |         |        |         |         |         |        |         |         |         |        |
|---|---------|---------|---------|--------|---------|---------|---------|--------|---------|---------|---------|--------|
| 1 | -2.1083 | -1.2862 | -0.1802 | 0.1069 | 0.1197  | 0.0307  | 0.1080  | 0.0825 | 0.0963  | 0.2038  | -0.0016 | 0.0826 |
| 1 | -1.0221 | -1.2915 | 1.2043  | 0.1040 | 0.1185  | 0.0287  | 0.1056  | 0.0819 | 0.1060  | 0.2001  | -0.0006 | 0.0822 |
| 1 | -0.4398 | 0.0000  | -1.5027 | 0.0821 | 0.1392  | 0.0321  | 0.0926  | 0.0937 | -0.0117 | 0.2109  | 0.0014  | 0.0881 |
| 1 | -0.5855 | 2.1675  | -0.2567 | 0.1186 | 0.1179  | 0.0292  | 0.1009  | 0.0821 | 0.1158  | 0.2083  | 0.0017  | 0.0835 |
| 1 | -1.0221 | 1.2915  | 1.2043  | 0.1040 | 0.1185  | 0.0287  | 0.1056  | 0.0819 | 0.1060  | 0.2001  | -0.0006 | 0.0822 |
| 1 | -2.1083 | 1.2862  | -0.1801 | 0.1069 | 0.1197  | 0.0307  | 0.1080  | 0.0825 | 0.0963  | 0.2038  | -0.0017 | 0.0826 |
| 1 | 1.2472  | -0.0001 | 1.3876  | 0.0180 | -0.0096 | -0.0292 | -0.0656 | 0.0524 | 0.0850  | -0.0869 | -0.5286 | 0.0482 |

Dipole mement (in D) 1.41 (DEN) 0.77 1.62 0.22 0.66 0.94 1.38 1.20 4.94 1.26

-----  
File TZVPMol372.out

Molecule PMol372 phosphorus\_mononitride

SP Mol372 B3LYP/Def2TZVP VAC.

0 2

Dipole 0.0000 0.0000 2.8788 2.8788

Quadrupole 0.8727 0.8727 -1.7454 0.0000 0.0000 0.0000

Atomic coordinates (in A) Mul. Lowdin Hirsch. I-Hirsch CM5 ESP NPA AIM ACP

15 0.0000 0.0000 0.4732 0.2531 0.3736 0.2542 0.5129 0.3227 0.4050 0.8388 1.3964 0.3451

7 0.0000 0.0000 -1.0140 -0.2531 -0.3736 -0.2542 -0.5129 -0.3227 -0.4050 -0.8388 -1.3964 -0.3451

Dipole mement (in D) 2.88 (DEN) 1.81 2.67 1.82 3.66 2.31 2.89 5.99 9.98 2.47

-----  
File TZVPMol373.out

Molecule PMol373 phosphorus\_oxychloride

SP Mol373 B3LYP/Def2TZVP VAC.

0 5

Dipole -0.0010 -0.0009 -2.4969 2.4969

Quadrupole 2.6836 2.6795 -5.3632 0.0004 -0.0010 0.0025

Atomic coordinates (in A) Mul. Lowdin Hirsch. I-Hirsch CM5 ESP NPA AIM ACP

15 0.0000 -0.0003 0.4209 0.7746 -0.3992 0.3823 1.5512 0.2734 0.2853 1.6578 3.1051 0.3648

17 -1.5015 -1.0137 -0.4174 -0.1111 0.2074 -0.0142 -0.2419 0.0266 0.0158 -0.2209 -0.5626 0.0003

17 -0.1276 1.8071 -0.4170 -0.1113 0.2071 -0.0144 -0.2421 0.0265 0.0155 -0.2211 -0.5625 0.0001

17 1.6289 -0.7929 -0.4176 -0.1112 0.2073 -0.0142 -0.2419 0.0267 0.0155 -0.2210 -0.5626 0.0003

8 0.0003 -0.0006 1.8714 -0.4411 -0.2226 -0.3395 -0.8253 -0.3532 -0.3320 -0.9948 -1.4175 -0.3655

Dipole mement (in D) 2.50 (DEN) 1.73 4.05 2.19 2.83 2.78 2.50 4.26 3.08 2.55

-----  
File TZVPMol374.out

Molecule PMol374 thiophosphoryl\_fluorid

SP Mol374 B3LYP/Def2TZVP VAC.

0 5

Dipole -0.5542 0.0007 -0.0013 0.5542

Quadrupole 0.0340 -0.0182 -0.0157 -0.0014 0.0022 0.0004

Atomic coordinates (in A) Mul. Lowdin Hirsch. I-Hirsch CM5 ESP NPA AIM ACP

15 -0.1691 0.0002 -0.0003 0.9089 -0.1311 0.4852 1.8394 0.3928 0.2531 2.1065 3.3279 0.4595

|    |         |         |         |         |        |         |         |         |         |         |         |         |
|----|---------|---------|---------|---------|--------|---------|---------|---------|---------|---------|---------|---------|
| 16 | 1.6885  | -0.0001 | -0.0005 | -0.2619 | 0.0470 | -0.1706 | -0.6268 | -0.1323 | -0.1237 | -0.5041 | -0.9219 | -0.1582 |
| 9  | -0.9067 | 1.3513  | -0.1003 | -0.2157 | 0.0279 | -0.1049 | -0.4042 | -0.0868 | -0.0441 | -0.5341 | -0.8021 | -0.1004 |
| 9  | -0.9055 | -0.5883 | 1.2205  | -0.2157 | 0.0281 | -0.1049 | -0.4042 | -0.0869 | -0.0438 | -0.5342 | -0.8022 | -0.1004 |
| 9  | -0.9079 | -0.7631 | -1.1187 | -0.2156 | 0.0281 | -0.1049 | -0.4042 | -0.0868 | -0.0416 | -0.5341 | -0.8022 | -0.1004 |

Dipole mement (in D) 0.55 (DEN) 0.04 0.12 0.41 1.30 0.26 0.65 1.18 0.30 0.34

-----  
File TZVPMol375.out

Molecule PMol375 hypophosphorous\_acid(=Mo)  
SP Mol375 B3LYP/Def2TZVP VAC.

0 6

Dipole -2.3137 1.0137 0.9115 2.6854

Quadrupole -4.5595 3.1096 1.4499 4.2698 -1.2671 -1.3670

|    | Atomic coordinates (in A) |         |         | Mul.    | Lowdin  | Hirsch. | I-Hirsch | CM5     | ESP     | NPA     | AIM     | ACP     |
|----|---------------------------|---------|---------|---------|---------|---------|----------|---------|---------|---------|---------|---------|
| 15 | 0.1204                    | 0.3598  | 0.0184  | 0.6117  | 0.2984  | 0.4253  | 1.6164   | 0.2637  | 0.8078  | 1.7780  | 3.3709  | 0.2670  |
| 1  | -0.0265                   | 1.2902  | -1.0221 | 0.0218  | -0.0091 | 0.0050  | -0.1673  | 0.0983  | 0.0001  | -0.1226 | -0.5584 | 0.0897  |
| 1  | 0.0596                    | 1.1564  | 1.1780  | 0.0076  | -0.0206 | -0.0048 | -0.1929  | 0.0864  | -0.0545 | -0.1358 | -0.5650 | 0.0811  |
| 8  | -1.3328                   | -0.3015 | -0.0711 | -0.4708 | -0.1538 | -0.2239 | -0.8894  | -0.4084 | -0.6034 | -0.9725 | -1.3703 | -0.3371 |
| 1  | -1.3880                   | -1.1383 | 0.3992  | 0.3328  | 0.1765  | 0.1919  | 0.4953   | 0.3730  | 0.4462  | 0.5030  | 0.6111  | 0.3054  |
| 8  | 1.2764                    | -0.5366 | -0.0327 | -0.5030 | -0.2914 | -0.3935 | -0.8621  | -0.4131 | -0.5963 | -1.0502 | -1.4886 | -0.4062 |

Dipole mement (in D) 2.69 (DEN) 2.54 1.89 2.31 2.79 2.70 2.71 4.15 3.53 2.70

-----  
File TZVPMol376.out

Molecule PMol376 methylphosphonic\_acid  
SP Mol376 B3LYP/Def2TZVP VAC.

0 10

Dipole -0.4811 0.0000 -1.3777 1.4593

Quadrupole 4.4392 3.2075 -7.6467 0.0000 -4.5672 0.0000

|    | Atomic coordinates (in A) |         |         | Mul.    | Lowdin  | Hirsch. | I-Hirsch | CM5     | ESP     | NPA     | AIM     | ACP     |
|----|---------------------------|---------|---------|---------|---------|---------|----------|---------|---------|---------|---------|---------|
| 8  | 0.8721                    | -0.0000 | 1.3473  | -0.5304 | -0.2729 | -0.4180 | -0.9906  | -0.4353 | -0.6797 | -1.0916 | -1.5215 | -0.4394 |
| 15 | 0.0886                    | 0.0000  | 0.1097  | 0.7661  | 0.1808  | 0.4617  | 2.2120   | 0.3985  | 1.0829  | 2.3491  | 3.5733  | 0.4555  |
| 6  | -1.6870                   | -0.0000 | 0.2131  | -0.3697 | -0.4074 | -0.1170 | -0.8866  | -0.2227 | -0.4538 | -1.0348 | -0.6847 | -0.2390 |
| 8  | 0.3538                    | 1.2696  | -0.8288 | -0.4704 | -0.1222 | -0.2325 | -0.9538  | -0.4111 | -0.6095 | -0.9868 | -1.3751 | -0.3543 |
| 8  | 0.3538                    | -1.2696 | -0.8288 | -0.4704 | -0.1222 | -0.2325 | -0.9538  | -0.4111 | -0.6095 | -0.9868 | -1.3753 | -0.3543 |
| 1  | 1.1618                    | 1.7239  | -0.5764 | 0.3341  | 0.1783  | 0.1852  | 0.4979   | 0.3691  | 0.4129  | 0.5052  | 0.6108  | 0.2956  |
| 1  | 1.1618                    | -1.7239 | -0.5764 | 0.3341  | 0.1783  | 0.1852  | 0.4979   | 0.3691  | 0.4129  | 0.5052  | 0.6108  | 0.2956  |
| 1  | -2.1250                   | -0.0000 | -0.7822 | 0.1403  | 0.1303  | 0.0557  | 0.1987   | 0.1149  | 0.1758  | 0.2480  | 0.0555  | 0.1107  |
| 1  | -2.0217                   | -0.8853 | 0.7466  | 0.1331  | 0.1285  | 0.0561  | 0.1891   | 0.1143  | 0.1340  | 0.2462  | 0.0525  | 0.1148  |
| 1  | -2.0217                   | 0.8853  | 0.7466  | 0.1331  | 0.1285  | 0.0561  | 0.1891   | 0.1143  | 0.1340  | 0.2462  | 0.0525  | 0.1148  |

Dipole mement (in D) 1.46 (DEN) 1.34 1.67 1.85 0.92 1.32 1.53 1.02 1.56 1.59

-----  
File TZVPMol377.out

Molecule PMol377 phosphine\_oxide



SP Mol377 B3LYP/Def2TZVP VAC.

0 5

Dipole 0.0001 3.5989 0.0000 3.5989

Quadrupole 1.1706 -2.3414 1.1707 0.0001 0.0000 0.0000

|    | Atomic coordinates (in A) |         |         | Mul.    | Lowdin  | Hirsch. | I-Hirsch | CM5     | ESP     | NPA     | AIM     | ACP     |
|----|---------------------------|---------|---------|---------|---------|---------|----------|---------|---------|---------|---------|---------|
| 8  | 0.0000                    | -1.0931 | 0.0000  | -0.5150 | -0.3228 | -0.3928 | -0.7855  | -0.4137 | -0.5781 | -1.0361 | -1.4749 | -0.4006 |
| 15 | 0.0000                    | 0.3784  | 0.0000  | 0.4349  | 0.3717  | 0.3849  | 1.2136   | 0.1506  | 0.7232  | 1.3288  | 3.1273  | 0.1239  |
| 1  | -1.2551                   | 1.0229  | 0.0000  | 0.0267  | -0.0163 | 0.0026  | -0.1427  | 0.0877  | -0.0482 | -0.0976 | -0.5508 | 0.0922  |
| 1  | 0.6276                    | 1.0230  | 1.0870  | 0.0267  | -0.0163 | 0.0026  | -0.1427  | 0.0877  | -0.0484 | -0.0976 | -0.5508 | 0.0922  |
| 1  | 0.6276                    | 1.0230  | -1.0870 | 0.0267  | -0.0163 | 0.0026  | -0.1427  | 0.0877  | -0.0484 | -0.0976 | -0.5508 | 0.0922  |

Dipole moment (in D) 3.60 (DEN) 3.89 2.13 2.80 4.23 3.74 3.64 6.42 5.31 3.69

-----  
File TZVPMol378.out

Molecule PMol378 OPH

SP Mol378 B3LYP/Def2TZVP VAC.

0 3

Dipole -0.3237 -2.3461 0.0000 2.3683

Quadrupole -0.4022 -1.6912 2.0934 0.4625 0.0000 0.0000

|    | Atomic coordinates (in A) |         |        | Mul.    | Lowdin  | Hirsch. | I-Hirsch | CM5     | ESP     | NPA     | AIM     | ACP     |
|----|---------------------------|---------|--------|---------|---------|---------|----------|---------|---------|---------|---------|---------|
| 8  | 0.0591                    | 1.0019  | 0.0000 | -0.3807 | -0.2556 | -0.2960 | -0.5667  | -0.3102 | -0.3335 | -0.9088 | -1.3112 | -0.3028 |
| 15 | 0.0591                    | -0.4784 | 0.0000 | 0.3886  | 0.3079  | 0.3389  | 0.7354   | 0.2762  | 0.3046  | 1.0923  | 1.8437  | 0.2691  |
| 1  | -1.3586                   | -0.8385 | 0.0000 | -0.0079 | -0.0523 | -0.0429 | -0.1687  | 0.0341  | 0.0289  | -0.1835 | -0.5321 | 0.0337  |

Dipole moment (in D) 2.37 (DEN) 2.69 1.76 2.05 3.91 2.28 2.43 6.27 9.15 2.22

-----  
File TZVPMol379.out

Molecule PMol379 hydroxyphosphane

SP Mol379 B3LYP/Def2TZVP VAC.

0 5

Dipole 0.8386 -0.0265 0.0000 0.8390

Quadrupole 0.4772 -0.2938 -0.1835 3.8051 0.0000 0.0000

|    | Atomic coordinates (in A) |         |         | Mul.    | Lowdin  | Hirsch. | I-Hirsch | CM5     | ESP     | NPA     | AIM     | ACP     |
|----|---------------------------|---------|---------|---------|---------|---------|----------|---------|---------|---------|---------|---------|
| 8  | 0.0399                    | 1.0862  | 0.0000  | -0.4948 | -0.2471 | -0.2540 | -0.7276  | -0.4390 | -0.4741 | -0.9456 | -1.3267 | -0.3530 |
| 15 | 0.0399                    | -0.5704 | 0.0000  | 0.1066  | 0.1282  | 0.1341  | 0.4478   | -0.0317 | -0.1589 | 0.6144  | 1.8053  | -0.0516 |
| 1  | 0.9420                    | 1.4069  | 0.0000  | 0.3171  | 0.1517  | 0.1663  | 0.4424   | 0.3468  | 0.4183  | 0.4819  | 0.5850  | 0.2845  |
| 1  | -0.9300                   | -0.7701 | 1.0155  | 0.0356  | -0.0164 | -0.0233 | -0.0813  | 0.0619  | 0.1074  | -0.0753 | -0.5317 | 0.0601  |
| 1  | -0.9300                   | -0.7701 | -1.0155 | 0.0356  | -0.0164 | -0.0233 | -0.0813  | 0.0619  | 0.1074  | -0.0753 | -0.5317 | 0.0601  |

Dipole moment (in D) 0.84 (DEN) 1.44 0.95 1.02 3.03 0.98 0.81 3.95 8.48 0.71

-----  
File TZVPMol380.out

Molecule PMol380 trimethylphosphine\_oxide

SP Mol380 B3LYP/Def2TZVP VAC.

0 14

```

Dipole      0.0002   0.0011  -4.2886   4.2886
Quadrupole  3.3303   3.3285  -6.6589   0.0006   0.0002   0.0042
  Atomic coordinates (in A)      Mul.      Lowdin      Hirsch.      I-Hirsch      CM5      ESP      NPA      AIM      ACP
15  0.0000  -0.0001  0.1876  0.6157  0.4315  0.3798  1.7948  0.2259  1.0992  1.9633  3.1549  0.2293
 6  -0.7825  1.4512  -0.5499  -0.3993  -0.4172  -0.1241  -0.8261  -0.2351  -0.5529  -1.0021  -0.6501  -0.2440
 6  1.6479  -0.0476  -0.5503  -0.3992  -0.4172  -0.1241  -0.8260  -0.2350  -0.5739  -1.0021  -0.6498  -0.2439
 6  -0.8654  -1.4028  -0.5509  -0.3992  -0.4172  -0.1241  -0.8262  -0.2350  -0.5562  -1.0021  -0.6503  -0.2440
 8  -0.0001  -0.0007  1.6643  -0.5641  -0.2847  -0.4287  -0.8978  -0.4463  -0.7171  -1.0815  -1.5105  -0.4471
 1  -1.8162  1.5149  -0.2161  0.1340  0.1252  0.0498  0.1788  0.1062  0.1486  0.2413  0.0406  0.1085
 1  -0.7661  1.4189  -1.6385  0.1140  0.1179  0.0408  0.1694  0.0960  0.1297  0.2256  0.0208  0.0995
 1  -0.2668  2.3499  -0.2175  0.1340  0.1252  0.0498  0.1788  0.1062  0.1489  0.2413  0.0406  0.1085
 1  2.1689  -0.9431  -0.2175  0.1340  0.1252  0.0498  0.1788  0.1062  0.1549  0.2413  0.0406  0.1085
 1  2.2197  0.8163  -0.2173  0.1340  0.1252  0.0498  0.1788  0.1062  0.1547  0.2413  0.0407  0.1085
 1  1.6113  -0.0465  -1.6389  0.1140  0.1179  0.0408  0.1694  0.0961  0.1345  0.2256  0.0208  0.0995
 1  -1.9011  -1.4067  -0.2170  0.1341  0.1252  0.0498  0.1789  0.1063  0.1496  0.2413  0.0407  0.1086
 1  -0.4026  -2.3300  -0.2192  0.1340  0.1252  0.0498  0.1788  0.1062  0.1496  0.2413  0.0406  0.1085
 1  -0.8472  -1.3707  -1.6395  0.1140  0.1179  0.0408  0.1694  0.0961  0.1306  0.2256  0.0208  0.0995

Dipole mement (in D)  4.29 (DEN)  4.32  2.15  3.38  4.13  4.43  4.35  5.77  4.82  4.46

```

-----  
File TZVPMol381.out

Molecule PMol381 PO

SP Mol381 B3LYP/Def2TZVP VAC.

0 2

```

Dipole      0.0000   0.0000   2.1072   2.1072
Quadrupole  2.0326  -0.7648  -1.2678   0.0000   0.0000   0.0000
  Atomic coordinates (in A)      Mul.      Lowdin      Hirsch.      I-Hirsch      CM5      ESP      NPA      AIM      ACP
15  0.0000  0.0000  0.5140  0.3293  0.2460  0.2708  0.5014  0.2794  0.3011  0.9047  1.2786  0.2797
 8  0.0000  0.0000  -0.9637  -0.3293  -0.2460  -0.2709  -0.5014  -0.2795  -0.3011  -0.9047  -1.2786  -0.2797

Dipole mement (in D)  2.11 (DEN)  2.34  1.75  1.92  3.56  1.98  2.14  6.42  9.08  1.99

```

-----  
File TZVPMol382.out

Molecule PMol382 phosphorus\_trichloride

SP Mol382 B3LYP/Def2TZVP VAC.

0 4

```

Dipole      -0.0001   0.0003   0.5648   0.5648
Quadrupole  -0.1627  -0.1617  0.3245  0.0003  0.0000  -0.0004
  Atomic coordinates (in A)      Mul.      Lowdin      Hirsch.      I-Hirsch      CM5      ESP      NPA      AIM      ACP
15  -0.0000  -0.0002  0.7273  0.4738  -0.2802  0.2410  0.5692  0.1369  0.1383  0.7648  1.5754  0.1841
17  1.7341  -0.5456  -0.2138  -0.1580  0.0933  -0.0804  -0.1898  -0.0457  -0.0457  -0.2549  -0.5252  -0.0614
17  -1.3397  -1.2286  -0.2142  -0.1580  0.0934  -0.0803  -0.1897  -0.0456  -0.0468  -0.2549  -0.5253  -0.0614
17  -0.3944  1.7743  -0.2137  -0.1579  0.0935  -0.0803  -0.1897  -0.0456  -0.0458  -0.2549  -0.5254  -0.0613

Dipole mement (in D)  0.56 (DEN)  2.14  1.27  1.09  2.57  0.62  0.63  3.46  7.12  0.83

```

-----  
File TZVPMol383.out

Molecule PMol383 phosphorus\_trifluoride

SP Mol383 B3LYP/Def2TZVP VAC.

0 4

Dipole -0.7136 0.8223 0.0000 1.0888

Quadrupole 0.0866 0.2122 -0.2988 -0.4416 0.0000 0.0000

Atomic coordinates (in A)

|    | Mul.    | Lowdin  | Hirsch. | I-Hirsch | CM5     | ESP     | NPA     | AIM     | ACP     |         |         |         |
|----|---------|---------|---------|----------|---------|---------|---------|---------|---------|---------|---------|---------|
| 15 | -0.3308 | 0.3811  | 0.0000  | 0.7190   | 0.1452  | 0.4278  | 1.0399  | 0.3769  | 0.2912  | 1.6894  | 2.4209  | 0.4023  |
| 9  | 1.2131  | 0.6817  | 0.0000  | -0.2396  | -0.0483 | -0.1426 | -0.3466 | -0.1256 | -0.0973 | -0.5631 | -0.8069 | -0.1341 |
| 9  | -0.3308 | -0.6584 | 1.1807  | -0.2397  | -0.0484 | -0.1426 | -0.3467 | -0.1257 | -0.0970 | -0.5631 | -0.8069 | -0.1341 |
| 9  | -0.3308 | -0.6584 | -1.1807 | -0.2397  | -0.0484 | -0.1426 | -0.3467 | -0.1257 | -0.0970 | -0.5631 | -0.8069 | -0.1341 |

Dipole mement (in D) 1.09 (DEN) 2.71 0.55 1.61 3.92 1.42 1.10 6.37 9.13 1.52

-----  
File TZVPMol384.out

Molecule PMol384 phosphoryl\_fluoride

SP Mol384 B3LYP/Def2TZVP VAC.

0 5

Dipole -1.8542 0.0026 0.0000 1.8542

Quadrupole -3.1725 1.5861 1.5864 0.0075 0.0019 0.0002

Atomic coordinates (in A)

|    | Mul.    | Lowdin  | Hirsch. | I-Hirsch | CM5     | ESP     | NPA     | AIM     | ACP     |         |         |         |
|----|---------|---------|---------|----------|---------|---------|---------|---------|---------|---------|---------|---------|
| 8  | 1.5831  | -0.0026 | -0.0006 | -0.4333  | -0.1914 | -0.3418 | -0.9565 | -0.3535 | -0.5292 | -1.0294 | -1.4620 | -0.3748 |
| 15 | 0.1471  | -0.0003 | -0.0001 | 1.0681   | 0.0366  | 0.6155  | 2.2656  | 0.5684  | 1.0633  | 2.6239  | 3.8626  | 0.6515  |
| 9  | -0.5506 | -0.2149 | 1.3445  | -0.2116  | 0.0516  | -0.0912 | -0.4364 | -0.0717 | -0.1781 | -0.5315 | -0.8003 | -0.0923 |
| 9  | -0.5486 | 1.2731  | -0.4850 | -0.2116  | 0.0516  | -0.0912 | -0.4364 | -0.0717 | -0.1780 | -0.5315 | -0.8003 | -0.0922 |
| 9  | -0.5532 | -1.0554 | -0.8588 | -0.2116  | 0.0516  | -0.0912 | -0.4364 | -0.0717 | -0.1780 | -0.5315 | -0.8003 | -0.0922 |

Dipole mement (in D) 1.85 (DEN) 0.86 1.84 1.44 2.21 1.72 1.86 1.76 2.04 1.66

-----  
File TZVPMol385.out

Molecule PMol385 FCP

SP Mol385 B3LYP/Def2TZVP VAC.

0 3

Dipole 0.0000 0.0000 0.0617 0.0617

Quadrupole -0.5373 -0.5373 1.0746 0.0000 0.0000 0.0000

Atomic coordinates (in A)

|    | Mul.   | Lowdin | Hirsch. | I-Hirsch | CM5     | ESP     | NPA     | AIM     | ACP     |         |         |         |
|----|--------|--------|---------|----------|---------|---------|---------|---------|---------|---------|---------|---------|
| 9  | 0.0000 | 0.0000 | -1.6587 | -0.1012  | 0.2940  | -0.0112 | -0.0155 | -0.0328 | 0.0601  | -0.2573 | -0.6581 | -0.0741 |
| 6  | 0.0000 | 0.0000 | -0.3898 | 0.2483   | -0.6360 | 0.0001  | 0.0018  | 0.0874  | -0.1080 | -0.0936 | -0.3832 | 0.1634  |
| 15 | 0.0000 | 0.0000 | 1.1512  | -0.1470  | 0.3420  | 0.0111  | 0.0138  | -0.0547 | 0.0478  | 0.3509  | 1.0412  | -0.0894 |

Dipole mement (in D) 0.06 (DEN) 0.47 0.74 0.15 0.20 0.20 0.01 4.17 11.72 0.21

-----  
File TZVPMol386.out

Molecule PMol386 CH3P(O)(OCH3)(SCH3)

SP Mol386 B3LYP/Def2TZVP VAC.

0 16

Dipole 0.1220 -0.2199 -1.5622 1.5823

Quadrupole 4.4390 4.2915 -8.7305 1.5272 1.8063 -2.8975

|    | Atomic coordinates (in A) |         |         | Mul.    | Lowdin  | Hirsch. | I-Hirsch | CM5     | ESP     | NPA     | AIM     | ACP     |
|----|---------------------------|---------|---------|---------|---------|---------|----------|---------|---------|---------|---------|---------|
| 8  | -0.1766                   | 0.4449  | 1.6425  | -0.5317 | -0.2635 | -0.3868 | -0.9032  | -0.4074 | -0.5883 | -1.0808 | -1.4867 | -0.4060 |
| 15 | -0.3561                   | 0.4509  | 0.1843  | 0.7106  | 0.1636  | 0.3929  | 1.8027   | 0.3161  | 0.9615  | 2.0202  | 3.0645  | 0.3676  |
| 6  | -0.6080                   | 2.0548  | -0.5653 | -0.3596 | -0.4250 | -0.1190 | -0.8799  | -0.2258 | -0.7859 | -1.0133 | -0.6601 | -0.2359 |
| 8  | -1.6376                   | -0.3084 | -0.3908 | -0.3416 | 0.0364  | -0.1761 | -0.5987  | -0.2431 | -0.3262 | -0.7892 | -1.3298 | -0.2371 |
| 16 | 1.2260                    | -0.4983 | -0.8166 | -0.1983 | 0.3243  | -0.0504 | -0.2233  | -0.0560 | -0.2487 | -0.1383 | -0.3878 | -0.1112 |
| 6  | 2.4956                    | -0.4032 | 0.4736  | -0.3108 | -0.5178 | -0.0781 | -0.3993  | -0.2094 | -0.1492 | -0.7153 | -0.0917 | -0.1947 |
| 6  | -1.9033                   | -1.6388 | 0.0539  | -0.1812 | -0.3462 | 0.0089  | -0.0571  | -0.1085 | 0.0124  | -0.2560 | 0.4502  | -0.0879 |
| 1  | 0.2529                    | 2.6848  | -0.3572 | 0.1320  | 0.1260  | 0.0529  | 0.1819   | 0.1102  | 0.2293  | 0.2430  | 0.0477  | 0.1126  |
| 1  | -1.4957                   | 2.5151  | -0.1358 | 0.1349  | 0.1279  | 0.0558  | 0.1907   | 0.1139  | 0.2380  | 0.2475  | 0.0541  | 0.1131  |
| 1  | -0.7324                   | 1.9642  | -1.6413 | 0.1351  | 0.1252  | 0.0502  | 0.1826   | 0.1082  | 0.2035  | 0.2447  | 0.0506  | 0.1065  |
| 1  | 3.1704                    | -1.2405 | 0.3218  | 0.1296  | 0.1086  | 0.0435  | 0.1349   | 0.0971  | 0.1215  | 0.2191  | 0.0392  | 0.1041  |
| 1  | 2.0236                    | -0.4803 | 1.4482  | 0.1688  | 0.1155  | 0.0444  | 0.1562   | 0.1046  | 0.0758  | 0.2483  | 0.0935  | 0.0941  |
| 1  | 3.0552                    | 0.5254  | 0.4049  | 0.1251  | 0.1032  | 0.0388  | 0.1271   | 0.0924  | 0.0832  | 0.2083  | 0.0334  | 0.0980  |
| 1  | -2.8247                   | -1.9529 | -0.4267 | 0.1264  | 0.1106  | 0.0461  | 0.1063   | 0.1069  | 0.0797  | 0.1896  | 0.0377  | 0.0969  |
| 1  | -2.0239                   | -1.6655 | 1.1361  | 0.1385  | 0.1097  | 0.0439  | 0.1020   | 0.1062  | 0.0625  | 0.1890  | 0.0477  | 0.0932  |
| 1  | -1.0930                   | -2.3092 | -0.2357 | 0.1222  | 0.1015  | 0.0327  | 0.0769   | 0.0944  | 0.0308  | 0.1832  | 0.0374  | 0.0866  |

Dipole moment (in D) 1.58 (DEN) 1.34 3.36 2.01 2.47 2.01 1.56 3.56 4.55 1.74

-----  
File TZVPMol387.out

Molecule PMol387 CH3P(O)(SCH3)2

SP Mol387 B3LYP/Def2TZVP VAC.

0 16

Dipole 0.6054 -0.0056 -1.4570 1.5778

Quadrupole 5.3059 4.3600 -9.6659 2.4229 -0.4587 -3.2612

|    | Atomic coordinates (in A) |         |         | Mul.    | Lowdin  | Hirsch. | I-Hirsch | CM5     | ESP     | NPA     | AIM     | ACP     |
|----|---------------------------|---------|---------|---------|---------|---------|----------|---------|---------|---------|---------|---------|
| 8  | 0.1980                    | 0.4279  | 1.7131  | -0.5345 | -0.2747 | -0.3825 | -0.8298  | -0.4027 | -0.5293 | -1.0719 | -1.4674 | -0.3970 |
| 15 | 0.0068                    | 0.5449  | 0.2553  | 0.6066  | 0.0736  | 0.3180  | 1.4623   | 0.2190  | 0.7056  | 1.6096  | 2.5532  | 0.2616  |
| 6  | 0.2607                    | 2.1984  | -0.4068 | -0.3685 | -0.4495 | -0.1192 | -0.8549  | -0.2274 | -0.6543 | -1.0061 | -0.6457 | -0.2307 |
| 16 | -1.8822                   | 0.0708  | -0.4873 | -0.1641 | 0.3377  | -0.0354 | -0.1529  | -0.0410 | -0.1789 | -0.0794 | -0.3756 | -0.0877 |
| 16 | 1.2429                    | -0.7648 | -0.8200 | -0.1729 | 0.3181  | -0.0455 | -0.1717  | -0.0518 | -0.2339 | -0.0995 | -0.3588 | -0.0999 |
| 6  | 2.6730                    | -0.7623 | 0.2951  | -0.3192 | -0.5208 | -0.0791 | -0.4098  | -0.2103 | -0.0988 | -0.7249 | -0.0971 | -0.1955 |
| 6  | -2.0817                   | -1.4954 | 0.4006  | -0.3238 | -0.5179 | -0.0753 | -0.4254  | -0.2062 | -0.2008 | -0.7219 | -0.0939 | -0.1905 |
| 1  | 0.0847                    | 2.2220  | -1.4796 | 0.1387  | 0.1239  | 0.0488  | 0.1754   | 0.1053  | 0.1799  | 0.2447  | 0.0500  | 0.1080  |
| 1  | 1.2883                    | 2.4978  | -0.2093 | 0.1357  | 0.1267  | 0.0544  | 0.1856   | 0.1114  | 0.2228  | 0.2462  | 0.0506  | 0.1141  |
| 1  | -0.4110                   | 2.8931  | 0.0937  | 0.1421  | 0.1271  | 0.0547  | 0.1862   | 0.1116  | 0.2103  | 0.2482  | 0.0558  | 0.1136  |
| 1  | 3.2646                    | -1.6405 | 0.0527  | 0.1333  | 0.1104  | 0.0453  | 0.1378   | 0.0989  | 0.1087  | 0.2235  | 0.0420  | 0.1059  |
| 1  | 2.3306                    | -0.8234 | 1.3239  | 0.1669  | 0.1145  | 0.0452  | 0.1540   | 0.1039  | 0.0781  | 0.2429  | 0.0853  | 0.0957  |
| 1  | 3.2835                    | 0.1267  | 0.1583  | 0.1239  | 0.1022  | 0.0382  | 0.1263   | 0.0918  | 0.0638  | 0.2069  | 0.0308  | 0.0974  |
| 1  | -3.0894                   | -1.8448 | 0.1974  | 0.1363  | 0.1115  | 0.0475  | 0.1430   | 0.1012  | 0.1489  | 0.2260  | 0.0450  | 0.1083  |
| 1  | -1.9571                   | -1.3378 | 1.4678  | 0.1589  | 0.1131  | 0.0475  | 0.1495   | 0.1039  | 0.0961  | 0.2332  | 0.0709  | 0.1008  |
| 1  | -1.3637                   | -2.2298 | 0.0451  | 0.1405  | 0.1042  | 0.0372  | 0.1244   | 0.0923  | 0.0819  | 0.2225  | 0.0530  | 0.0960  |

Dipole mement (in D) 1.58 (DEN) 1.74 4.58 2.18 2.77 2.23 1.53 4.96 5.10 1.91

-----  
File TZVPMol388.out

Molecule PMol388 OP(OCH3)(SCH3)2

SP Mol388 B3LYP/Def2TZVP VAC.

0 17

Dipole 0.4050 0.1873 -2.8505 2.8852  
 Quadrupole 5.5256 5.5157 -11.0413 1.9455 0.2226 -0.8133

|    | Atomic coordinates (in A) |         |         | Mul.    | Lowdin  | Hirsch. | I-Hirsch | CM5     | ESP     | NPA     | AIM     | ACP     |
|----|---------------------------|---------|---------|---------|---------|---------|----------|---------|---------|---------|---------|---------|
| 8  | 0.1723                    | -0.5052 | 1.8196  | -0.5079 | -0.2525 | -0.3712 | -0.8556  | -0.3881 | -0.4965 | -1.0631 | -1.4615 | -0.3899 |
| 15 | 0.0030                    | 0.1541  | 0.5237  | 0.7302  | -0.0427 | 0.3529  | 1.6085   | 0.3072  | 0.6107  | 1.8321  | 2.7737  | 0.3608  |
| 8  | 0.3011                    | 1.7138  | 0.6111  | -0.3155 | 0.0445  | -0.1671 | -0.5822  | -0.2307 | -0.2684 | -0.7826 | -1.3237 | -0.2240 |
| 16 | 1.2083                    | -0.6633 | -0.9747 | -0.1768 | 0.3229  | -0.0328 | -0.2036  | -0.0383 | -0.1738 | -0.1173 | -0.3557 | -0.0885 |
| 16 | -1.8881                   | 0.1015  | -0.3394 | -0.1657 | 0.3420  | -0.0281 | -0.1979  | -0.0321 | -0.1596 | -0.0961 | -0.3621 | -0.0832 |
| 6  | -2.1580                   | -1.6848 | -0.1958 | -0.3213 | -0.5161 | -0.0734 | -0.4179  | -0.2044 | -0.2248 | -0.7184 | -0.0913 | -0.1890 |
| 6  | 2.6274                    | -1.1382 | 0.0512  | -0.3148 | -0.5154 | -0.0755 | -0.4084  | -0.2067 | -0.0958 | -0.7204 | -0.0935 | -0.1926 |
| 6  | 0.2452                    | 2.5659  | -0.5291 | -0.1868 | -0.3591 | 0.0070  | -0.0568  | -0.1103 | 0.0699  | -0.2559 | 0.4543  | -0.0880 |
| 1  | -3.1485                   | -1.8823 | -0.5950 | 0.1356  | 0.1119  | 0.0485  | 0.1448   | 0.1021  | 0.1566  | 0.2257  | 0.0464  | 0.1094  |
| 1  | -2.1160                   | -1.9881 | 0.8456  | 0.1590  | 0.1134  | 0.0491  | 0.1498   | 0.1050  | 0.1230  | 0.2320  | 0.0693  | 0.1036  |
| 1  | -1.4186                   | -2.2306 | -0.7760 | 0.1419  | 0.1041  | 0.0375  | 0.1241   | 0.0928  | 0.0729  | 0.2237  | 0.0551  | 0.0966  |
| 1  | 3.2265                    | -0.2728 | 0.3193  | 0.1331  | 0.1061  | 0.0429  | 0.1320   | 0.0971  | 0.0812  | 0.2138  | 0.0419  | 0.1014  |
| 1  | 3.2277                    | -1.8213 | -0.5428 | 0.1326  | 0.1104  | 0.0458  | 0.1390   | 0.0994  | 0.0941  | 0.2225  | 0.0421  | 0.1065  |
| 1  | 2.2776                    | -1.6384 | 0.9489  | 0.1655  | 0.1149  | 0.0473  | 0.1552   | 0.1056  | 0.0809  | 0.2420  | 0.0843  | 0.0984  |
| 1  | 0.6798                    | 3.5157  | -0.2318 | 0.1326  | 0.1131  | 0.0500  | 0.1122   | 0.1108  | 0.0776  | 0.1947  | 0.0452  | 0.1009  |
| 1  | -0.7867                   | 2.7251  | -0.8436 | 0.1290  | 0.1025  | 0.0367  | 0.0847   | 0.0980  | 0.0480  | 0.1798  | 0.0326  | 0.0912  |
| 1  | 0.8165                    | 2.1450  | -1.3580 | 0.1292  | 0.1000  | 0.0307  | 0.0721   | 0.0929  | 0.0040  | 0.1874  | 0.0435  | 0.0863  |

Dipole mement (in D) 2.89 (DEN) 2.94 4.63 2.98 4.21 3.61 2.82 7.14 8.86 3.24

-----  
File TZVPMol389.out

Molecule PMol389 trimethylphosphine\_sulfi

SP Mol389 B3LYP/Def2TZVP VAC.

0 14

Dipole 4.6906 -0.0003 -0.0003 4.6906  
 Quadrupole -4.3221 2.1614 2.1607 0.0000 0.0006 0.0002

|    | Atomic coordinates (in A) |         |         | Mul.    | Lowdin  | Hirsch. | I-Hirsch | CM5     | ESP     | NPA     | AIM     | ACP     |
|----|---------------------------|---------|---------|---------|---------|---------|----------|---------|---------|---------|---------|---------|
| 15 | 0.1554                    | 0.0000  | -0.0001 | 0.3893  | 0.3036  | 0.2927  | 1.4265   | 0.1001  | 0.5182  | 1.3740  | 2.5519  | 0.1062  |
| 6  | 0.9164                    | -1.2205 | -1.1004 | -0.3609 | -0.4245 | -0.1207 | -0.7771  | -0.2326 | -0.4684 | -0.9681 | -0.6241 | -0.2363 |
| 6  | 0.9166                    | 1.5632  | -0.5068 | -0.3609 | -0.4245 | -0.1207 | -0.7770  | -0.2325 | -0.4260 | -0.9680 | -0.6240 | -0.2362 |
| 6  | 0.9168                    | -0.3428 | 1.6070  | -0.3610 | -0.4245 | -0.1207 | -0.7771  | -0.2326 | -0.4650 | -0.9680 | -0.6243 | -0.2363 |
| 16 | -1.7737                   | 0.0000  | 0.0002  | -0.4625 | -0.1323 | -0.3514 | -0.6528  | -0.3242 | -0.4515 | -0.6040 | -1.0209 | -0.3513 |
| 1  | 0.5897                    | -2.2174 | -0.8138 | 0.1353  | 0.1252  | 0.0495  | 0.1761   | 0.1054  | 0.1450  | 0.2435  | 0.0459  | 0.1089  |
| 1  | 2.0045                    | -1.1745 | -1.0600 | 0.1147  | 0.1170  | 0.0413  | 0.1671   | 0.0965  | 0.1506  | 0.2244  | 0.0219  | 0.1001  |
| 1  | 0.5884                    | -1.0391 | -2.1214 | 0.1354  | 0.1252  | 0.0495  | 0.1760   | 0.1054  | 0.1482  | 0.2435  | 0.0460  | 0.1089  |
| 1  | 0.5895                    | 2.3565  | 0.1614  | 0.1353  | 0.1252  | 0.0495  | 0.1760   | 0.1054  | 0.1348  | 0.2435  | 0.0459  | 0.1089  |

|   |        |         |         |        |        |        |        |        |        |        |        |        |
|---|--------|---------|---------|--------|--------|--------|--------|--------|--------|--------|--------|--------|
| 1 | 0.5891 | 1.8139  | -1.5131 | 0.1353 | 0.1252 | 0.0495 | 0.1760 | 0.1054 | 0.1341 | 0.2435 | 0.0459 | 0.1089 |
| 1 | 2.0048 | 1.5049  | -0.4882 | 0.1147 | 0.1170 | 0.0414 | 0.1671 | 0.0965 | 0.1391 | 0.2244 | 0.0219 | 0.1001 |
| 1 | 0.5890 | -1.3177 | 1.9604  | 0.1353 | 0.1252 | 0.0495 | 0.1760 | 0.1054 | 0.1447 | 0.2435 | 0.0460 | 0.1089 |
| 1 | 0.5905 | 0.4040  | 2.3272  | 0.1353 | 0.1252 | 0.0495 | 0.1760 | 0.1054 | 0.1464 | 0.2435 | 0.0459 | 0.1089 |
| 1 | 2.0050 | -0.3308 | 1.5467  | 0.1147 | 0.1170 | 0.0413 | 0.1671 | 0.0965 | 0.1498 | 0.2244 | 0.0219 | 0.1001 |

Dipole mement (in D) 4.69 (DEN) 5.07 1.25 3.65 4.18 4.34 4.90 4.00 3.77 4.69

-----  
 File TZVPMol390.out  
 Molecule PMol390 PS  
 SP Mol390 B3LYP/Def2TZVP VAC.  
 0 2

|                                                                            |         |        |         |         |         |         |         |         |         |         |         |         |
|----------------------------------------------------------------------------|---------|--------|---------|---------|---------|---------|---------|---------|---------|---------|---------|---------|
| Dipole                                                                     | 0.0000  | 0.0000 | -0.6643 | 0.6643  |         |         |         |         |         |         |         |         |
| Quadrupole                                                                 | -1.7218 | 1.1618 | 0.5599  | 0.0000  | 0.0000  | 0.0000  |         |         |         |         |         |         |
| Atomic coordinates (in A) Mul. Lowdin Hirsch. I-Hirsch CM5 ESP NPA AIM ACP |         |        |         |         |         |         |         |         |         |         |         |         |
| 15                                                                         | 0.0000  | 0.0000 | -0.9776 | 0.1354  | -0.0495 | 0.0829  | 0.1451  | 0.0486  | 0.0761  | 0.2738  | 0.8007  | 0.0577  |
| 16                                                                         | 0.0000  | 0.0000 | 0.9165  | -0.1354 | 0.0495  | -0.0829 | -0.1451 | -0.0487 | -0.0761 | -0.2738 | -0.8007 | -0.0577 |

Dipole mement (in D) 0.66 (DEN) 1.23 0.45 0.75 1.32 0.44 0.69 2.49 7.29 0.52

-----  
 File TZVPMol391.out  
 Molecule PMol391 SP(CH3)(OCH3)2  
 SP Mol391 B3LYP/Def2TZVP VAC.  
 0 16

|                                                                            |         |         |         |         |         |         |         |         |         |         |         |         |
|----------------------------------------------------------------------------|---------|---------|---------|---------|---------|---------|---------|---------|---------|---------|---------|---------|
| Dipole                                                                     | 0.0004  | -1.4149 | -2.0374 | 2.4805  |         |         |         |         |         |         |         |         |
| Quadrupole                                                                 | 2.6552  | 4.2444  | -6.8996 | 0.0003  | 0.0059  | -3.5256 |         |         |         |         |         |         |
| Atomic coordinates (in A) Mul. Lowdin Hirsch. I-Hirsch CM5 ESP NPA AIM ACP |         |         |         |         |         |         |         |         |         |         |         |         |
| 15                                                                         | 0.0002  | 0.3958  | -0.1741 | 0.6455  | 0.1136  | 0.3773  | 1.7485  | 0.2827  | 0.4607  | 1.8583  | 3.0571  | 0.3212  |
| 16                                                                         | -0.0013 | 0.5677  | 1.7316  | -0.4405 | -0.0828 | -0.2936 | -0.7087 | -0.2646 | -0.3406 | -0.6258 | -1.0372 | -0.2972 |
| 8                                                                          | -1.2742 | -0.3529 | -0.7966 | -0.3310 | 0.0403  | -0.1793 | -0.5919 | -0.2471 | -0.2094 | -0.7909 | -1.3313 | -0.2399 |
| 8                                                                          | 1.2760  | -0.3522 | -0.7947 | -0.3309 | 0.0403  | -0.1792 | -0.5919 | -0.2471 | -0.2088 | -0.7909 | -1.3315 | -0.2399 |
| 6                                                                          | 0.0007  | 1.8634  | -1.1898 | -0.3431 | -0.4117 | -0.1180 | -0.8601 | -0.2242 | -0.6940 | -0.9949 | -0.6568 | -0.2360 |
| 6                                                                          | -1.9327 | -1.4120 | -0.1136 | -0.1709 | -0.3542 | 0.0050  | -0.0455 | -0.1126 | -0.0747 | -0.2489 | 0.4641  | -0.0898 |
| 6                                                                          | 1.9324  | -1.4125 | -0.1116 | -0.1710 | -0.3542 | 0.0050  | -0.0456 | -0.1126 | -0.0653 | -0.2489 | 0.4641  | -0.0897 |
| 1                                                                          | 0.0015  | 1.5851  | -2.2414 | 0.1346  | 0.1271  | 0.0530  | 0.1901  | 0.1125  | 0.2162  | 0.2466  | 0.0543  | 0.1062  |
| 1                                                                          | 0.8857  | 2.4541  | -0.9716 | 0.1336  | 0.1267  | 0.0535  | 0.1841  | 0.1114  | 0.2268  | 0.2458  | 0.0525  | 0.1117  |
| 1                                                                          | -0.8847 | 2.4539  | -0.9727 | 0.1336  | 0.1267  | 0.0535  | 0.1841  | 0.1114  | 0.2265  | 0.2458  | 0.0525  | 0.1117  |
| 1                                                                          | -2.9005 | -1.5417 | -0.5897 | 0.1242  | 0.1100  | 0.0446  | 0.1026  | 0.1053  | 0.0923  | 0.1875  | 0.0351  | 0.0952  |
| 1                                                                          | -2.0672 | -1.1693 | 0.9407  | 0.1373  | 0.1030  | 0.0314  | 0.0861  | 0.0941  | 0.0636  | 0.1968  | 0.0559  | 0.0879  |
| 1                                                                          | -1.3669 | -2.3409 | -0.1979 | 0.1086  | 0.1011  | 0.0353  | 0.0796  | 0.0956  | 0.0799  | 0.1675  | 0.0158  | 0.0879  |
| 1                                                                          | 2.9011  | -1.5424 | -0.5859 | 0.1242  | 0.1100  | 0.0446  | 0.1026  | 0.1053  | 0.0890  | 0.1875  | 0.0351  | 0.0952  |
| 1                                                                          | 1.3661  | -2.3410 | -0.1982 | 0.1086  | 0.1011  | 0.0353  | 0.0796  | 0.0956  | 0.0770  | 0.1675  | 0.0158  | 0.0879  |
| 1                                                                          | 2.0648  | -1.1712 | 0.9432  | 0.1373  | 0.1030  | 0.0315  | 0.0861  | 0.0941  | 0.0606  | 0.1968  | 0.0559  | 0.0879  |

Dipole mement (in D) 2.48 (DEN) 2.27 0.80 1.97 2.69 1.73 2.55 2.22 4.76 1.97

-----  
File TZVPMol392.out

Molecule PMol392 SH  
SP Mol392 B3LYP/Def2TZVP VAC.

0 2

Dipole 0.0000 0.0000 -0.8635 0.8635

Quadrupole -2.1678 0.6020 1.5658 0.0000 0.0000 0.0000

Atomic coordinates (in A)

|    | Mul.   | Lowdin | Hirsch. | I-Hirsch | CM5     | ESP     | NPA     | AIM     | ACP     |         |         |         |
|----|--------|--------|---------|----------|---------|---------|---------|---------|---------|---------|---------|---------|
| 16 | 0.0000 | 0.0000 | 0.0788  | -0.1495  | -0.0060 | -0.0484 | -0.0958 | -0.1137 | -0.1491 | -0.0887 | 0.0073  | -0.1204 |
| 1  | 0.0000 | 0.0000 | -1.2613 | 0.1495   | 0.0060  | 0.0484  | 0.0958  | 0.1137  | 0.1491  | 0.0887  | -0.0073 | 0.1204  |

Dipole mement (in D) 0.86 (DEN) 0.96 0.04 0.31 0.62 0.73 0.96 0.57 0.05 0.77

-----  
File TZVPMol393.out

Molecule PMol393 CH2SH  
SP Mol393 B3LYP/Def2TZVP VAC.

0 5

Dipole -0.2074 0.8546 0.0000 0.8794

Quadrupole 0.6412 2.2048 -2.8460 1.2272 -0.0001 0.0000

Atomic coordinates (in A)

|    | Mul.    | Lowdin  | Hirsch. | I-Hirsch | CM5     | ESP     | NPA     | AIM     | ACP     |         |         |         |
|----|---------|---------|---------|----------|---------|---------|---------|---------|---------|---------|---------|---------|
| 6  | -1.1266 | 0.0217  | -0.0000 | -0.3344  | -0.5671 | -0.1264 | -0.4179 | -0.2129 | -0.5656 | -0.6297 | -0.2951 | -0.1775 |
| 16 | 0.5770  | -0.0885 | 0.0000  | -0.0694  | 0.3359  | -0.0031 | 0.0531  | -0.0922 | -0.0936 | 0.1170  | 0.1797  | -0.1384 |
| 1  | -1.6400 | 0.9676  | 0.0000  | 0.1370   | 0.0923  | 0.0366  | 0.1313  | 0.0901  | 0.2087  | 0.1978  | 0.0698  | 0.0930  |
| 1  | -1.6794 | -0.9026 | 0.0000  | 0.1359   | 0.0961  | 0.0362  | 0.1313  | 0.0903  | 0.2657  | 0.1988  | 0.0674  | 0.0922  |
| 1  | 0.8470  | 1.2218  | -0.0000 | 0.1310   | 0.0429  | 0.0568  | 0.1023  | 0.1247  | 0.1847  | 0.1161  | -0.0216 | 0.1307  |

Dipole mement (in D) 0.88 (DEN) 0.81 2.67 0.47 0.93 0.78 0.91 1.22 0.94 0.92

-----  
File TZVPMol394.out

Molecule PMol394 ethenethiol  
SP Mol394 B3LYP/Def2TZVP VAC.

0 7

Dipole 0.7179 0.2279 0.0000 0.7532

Quadrupole 0.8579 2.5703 -3.4283 -1.9869 0.0000 0.0000

Atomic coordinates (in A)

|    | Mul.    | Lowdin  | Hirsch. | I-Hirsch | CM5     | ESP     | NPA     | AIM     | ACP     |         |         |         |
|----|---------|---------|---------|----------|---------|---------|---------|---------|---------|---------|---------|---------|
| 6  | 1.2818  | 1.1006  | 0.0000  | -0.3047  | -0.2664 | -0.1034 | -0.3200 | -0.2047 | -0.4696 | -0.4280 | -0.0432 | -0.2022 |
| 6  | 0.0000  | 0.7509  | 0.0000  | -0.0511  | -0.4805 | -0.0498 | -0.0970 | -0.0949 | -0.1652 | -0.3517 | -0.1792 | -0.0277 |
| 16 | -0.6894 | -0.8505 | 0.0000  | -0.1231  | 0.3345  | -0.0264 | -0.0468 | -0.1125 | -0.1975 | 0.0583  | 0.1166  | -0.1709 |
| 1  | 2.0841  | 0.3745  | 0.0000  | 0.1130   | 0.1156  | 0.0355  | 0.1148  | 0.0889  | 0.2090  | 0.1891  | 0.0287  | 0.0854  |
| 1  | 1.5644  | 2.1435  | 0.0000  | 0.1164   | 0.1235  | 0.0393  | 0.1228  | 0.0924  | 0.1814  | 0.2045  | 0.0411  | 0.0882  |
| 1  | -0.7765 | 1.5070  | 0.0000  | 0.1253   | 0.1316  | 0.0499  | 0.1176  | 0.1076  | 0.2413  | 0.2144  | 0.0593  | 0.1019  |
| 1  | 0.4674  | -1.5264 | 0.0000  | 0.1243   | 0.0418  | 0.0548  | 0.1085  | 0.1231  | 0.2006  | 0.1134  | -0.0230 | 0.1252  |

Dipole mement (in D) 0.75 (DEN) 0.36 2.61 0.19 0.33 0.57 0.81 0.61 0.43 0.85

File TZVPMol395.out

Molecule PMol395 methanethiol

SP Mol395 B3LYP/Def2TZVP VAC.

0 6

|                      |                           |         |         |         |         |         |          |         |         |         |         |         |
|----------------------|---------------------------|---------|---------|---------|---------|---------|----------|---------|---------|---------|---------|---------|
| Dipole               | 0.7286                    | 1.3668  | 0.0000  | 1.5489  |         |         |          |         |         |         |         |         |
| Quadrupole           | 1.5098                    | 0.3206  | -1.8304 | -1.2385 | 0.0000  | 0.0000  |          |         |         |         |         |         |
|                      | Atomic coordinates (in A) |         |         | Mul.    | Lowdin  | Hirsch. | I-Hirsch | CM5     | ESP     | NPA     | AIM     | ACP     |
| 16                   | -0.0475                   | -0.6618 | 0.0000  | -0.1929 | 0.1979  | -0.0793 | -0.0715  | -0.1705 | -0.2999 | -0.0323 | 0.0256  | -0.2196 |
| 6                    | -0.0475                   | 1.1437  | 0.0000  | -0.3159 | -0.5416 | -0.0837 | -0.3952  | -0.2189 | -0.1963 | -0.7135 | -0.0838 | -0.1980 |
| 1                    | 1.2798                    | -0.8228 | 0.0000  | 0.1199  | 0.0290  | 0.0423  | 0.0944   | 0.1100  | 0.1816  | 0.1090  | -0.0456 | 0.1156  |
| 1                    | -1.0885                   | 1.4530  | 0.0000  | 0.1289  | 0.1111  | 0.0450  | 0.1324   | 0.0985  | 0.1530  | 0.2196  | 0.0387  | 0.1060  |
| 1                    | 0.4274                    | 1.5484  | 0.8893  | 0.1300  | 0.1018  | 0.0379  | 0.1199   | 0.0905  | 0.0808  | 0.2086  | 0.0326  | 0.0980  |
| 1                    | 0.4274                    | 1.5484  | -0.8893 | 0.1300  | 0.1018  | 0.0379  | 0.1199   | 0.0905  | 0.0808  | 0.2086  | 0.0326  | 0.0980  |
| Dipole mement (in D) | 1.55 (DEN)                |         | 1.43    | 1.43    | 0.55    | 0.62    | 1.13     | 1.62    | 0.67    | 0.52    | 1.50    |         |

File TZVPMol396.out

Molecule PMol396 ethanethiol\_(gauche)

SP Mol396 B3LYP/Def2TZVP VAC.

0 9

|                      |                           |         |         |         |         |         |          |         |         |         |         |         |
|----------------------|---------------------------|---------|---------|---------|---------|---------|----------|---------|---------|---------|---------|---------|
| Dipole               | 1.4914                    | 0.1263  | 0.6528  | 1.6329  |         |         |          |         |         |         |         |         |
| Quadrupole           | -1.4210                   | 0.6585  | 0.7625  | 1.2772  | -0.6095 | -1.6732 |          |         |         |         |         |         |
|                      | Atomic coordinates (in A) |         |         | Mul.    | Lowdin  | Hirsch. | I-Hirsch | CM5     | ESP     | NPA     | AIM     | ACP     |
| 1                    | -1.0549                   | -0.9416 | 0.9565  | 0.1156  | 0.0294  | 0.0409  | 0.0946   | 0.1089  | 0.1771  | 0.1060  | -0.0483 | 0.1126  |
| 16                   | -1.1586                   | -0.0991 | -0.0784 | -0.2029 | 0.2287  | -0.0797 | -0.1050  | -0.1697 | -0.3403 | -0.0395 | 0.0035  | -0.2272 |
| 6                    | 0.4929                    | 0.6396  | 0.0901  | -0.1619 | -0.5153 | -0.0442 | -0.1655  | -0.1409 | 0.0499  | -0.4964 | -0.0427 | -0.0879 |
| 6                    | 1.6299                    | -0.3458 | -0.0532 | -0.3013 | -0.3399 | -0.0863 | -0.3505  | -0.2361 | -0.1383 | -0.6016 | 0.0254  | -0.2416 |
| 1                    | 0.5472                    | 1.1784  | 1.0351  | 0.1188  | 0.1189  | 0.0339  | 0.0956   | 0.0898  | 0.0143  | 0.2048  | 0.0229  | 0.0908  |
| 1                    | 0.5273                    | 1.3935  | -0.6956 | 0.1128  | 0.1258  | 0.0409  | 0.1085   | 0.0977  | 0.1100  | 0.2132  | 0.0265  | 0.0991  |
| 1                    | 2.5937                    | 0.1605  | 0.0135  | 0.1046  | 0.1185  | 0.0329  | 0.1089   | 0.0842  | 0.0382  | 0.2051  | 0.0009  | 0.0861  |
| 1                    | 1.5857                    | -0.8665 | -1.0079 | 0.1144  | 0.1184  | 0.0313  | 0.1089   | 0.0837  | 0.0343  | 0.2089  | 0.0127  | 0.0839  |
| 1                    | 1.6012                    | -1.1006 | 0.7320  | 0.0999  | 0.1153  | 0.0302  | 0.1045   | 0.0824  | 0.0548  | 0.1995  | -0.0008 | 0.0842  |
| Dipole mement (in D) | 1.63 (DEN)                |         | 1.49    | 1.60    | 0.57    | 0.66    | 1.17     | 1.68    | 0.73    | 0.69    | 1.59    |         |

File TZVPMol397.out

Molecule PMol397 ethanethiol\_(trans)

SP Mol397 B3LYP/Def2TZVP VAC.

0 9

|            |                           |         |         |         |         |         |          |         |         |         |         |         |
|------------|---------------------------|---------|---------|---------|---------|---------|----------|---------|---------|---------|---------|---------|
| Dipole     | 0.0341                    | 1.6342  | 0.0000  | 1.6346  |         |         |          |         |         |         |         |         |
| Quadrupole | 2.3428                    | -0.8162 | -1.5266 | -0.2689 | 0.0000  | 0.0000  |          |         |         |         |         |         |
|            | Atomic coordinates (in A) |         |         | Mul.    | Lowdin  | Hirsch. | I-Hirsch | CM5     | ESP     | NPA     | AIM     | ACP     |
| 1          | -2.0276                   | -0.4353 | 0.0000  | 0.1189  | 0.0287  | 0.0417  | 0.0914   | 0.1095  | 0.1698  | 0.1137  | -0.0465 | 0.1146  |
| 16         | -0.7518                   | -0.8348 | 0.0000  | -0.2040 | 0.2215  | -0.0832 | -0.1057  | -0.1732 | -0.3291 | -0.0498 | -0.0027 | -0.2313 |
| 6          | 0.0000                    | 0.8243  | 0.0000  | -0.1551 | -0.5029 | -0.0454 | -0.1590  | -0.1423 | -0.0343 | -0.4884 | -0.0401 | -0.0896 |
| 6          | 1.5063                    | 0.6892  | 0.0000  | -0.3248 | -0.3407 | -0.0832 | -0.3530  | -0.2326 | -0.0894 | -0.6037 | 0.0213  | -0.2388 |



|   |         |        |         |        |        |        |        |        |        |        |        |        |
|---|---------|--------|---------|--------|--------|--------|--------|--------|--------|--------|--------|--------|
| 1 | -0.3383 | 1.3689 | 0.8802  | 0.1115 | 0.1174 | 0.0339 | 0.0952 | 0.0899 | 0.0640 | 0.2024 | 0.0208 | 0.0912 |
| 1 | -0.3383 | 1.3689 | -0.8802 | 0.1115 | 0.1174 | 0.0339 | 0.0952 | 0.0899 | 0.0640 | 0.2024 | 0.0208 | 0.0912 |
| 1 | 1.9781  | 1.6706 | 0.0000  | 0.1108 | 0.1207 | 0.0360 | 0.1138 | 0.0876 | 0.0231 | 0.2107 | 0.0067 | 0.0898 |
| 1 | 1.8585  | 0.1513 | -0.8790 | 0.1156 | 0.1190 | 0.0331 | 0.1110 | 0.0856 | 0.0660 | 0.2064 | 0.0101 | 0.0864 |
| 1 | 1.8585  | 0.1513 | 0.8790  | 0.1156 | 0.1190 | 0.0331 | 0.1110 | 0.0856 | 0.0660 | 0.2064 | 0.0101 | 0.0864 |

Dipole mement (in D) 1.63 (DEN) 1.40 1.53 0.59 0.82 1.14 1.66 0.73 0.87 1.59

-----  
File TZVPMol398.out

Molecule PMol398 1-propane\_thiol

SP Mol398 B3LYP/Def2TZVP VAC.

0 12

Dipole 1.5714 -0.0580 0.6320 1.6947  
 Quadrupole -2.4990 0.9252 1.5738 0.9615 -1.2175 -1.6583

|    | Atomic coordinates (in A) |         |         | Mul.    | Lowdin  | Hirsch. | I-Hirsch | CM5     | ESP     | NPA     | AIM     | ACP     |
|----|---------------------------|---------|---------|---------|---------|---------|----------|---------|---------|---------|---------|---------|
| 6  | 2.3995                    | 0.0735  | 0.0097  | -0.3322 | -0.3087 | -0.0828 | -0.3268  | -0.2345 | -0.2849 | -0.5882 | 0.0095  | -0.2471 |
| 1  | 3.1610                    | -0.6982 | -0.0886 | 0.1150  | 0.1188  | 0.0326  | 0.1048   | 0.0840  | 0.0713  | 0.2079  | 0.0016  | 0.0863  |
| 1  | 2.5721                    | 0.8048  | -0.7805 | 0.1047  | 0.1175  | 0.0292  | 0.1006   | 0.0810  | 0.0476  | 0.1967  | -0.0059 | 0.0815  |
| 1  | 2.5691                    | 0.5800  | 0.9604  | 0.1031  | 0.1168  | 0.0285  | 0.0995   | 0.0803  | 0.0604  | 0.1961  | -0.0067 | 0.0808  |
| 6  | 0.9994                    | -0.5070 | -0.0696 | -0.1393 | -0.3275 | -0.0490 | -0.1367  | -0.1603 | 0.3065  | -0.3988 | 0.0652  | -0.1327 |
| 1  | 0.8620                    | -1.2606 | 0.7099  | 0.0808  | 0.1295  | 0.0272  | 0.0842   | 0.0827  | -0.0466 | 0.1921  | -0.0119 | 0.0777  |
| 6  | -0.0672                   | 0.5611  | 0.0757  | -0.1706 | -0.4919 | -0.0470 | -0.2037  | -0.1419 | -0.1029 | -0.4949 | -0.0536 | -0.0935 |
| 1  | 0.0260                    | 1.3057  | -0.7160 | 0.1102  | 0.1277  | 0.0394  | 0.1087   | 0.0968  | 0.1345  | 0.2118  | 0.0235  | 0.0961  |
| 1  | 0.0444                    | 1.1011  | 1.0168  | 0.1161  | 0.1206  | 0.0327  | 0.0965   | 0.0892  | 0.0359  | 0.2034  | 0.0200  | 0.0882  |
| 16 | -1.7716                   | -0.0438 | -0.0728 | -0.2006 | 0.2352  | -0.0796 | -0.1077  | -0.1698 | -0.3315 | -0.0348 | 0.0043  | -0.2269 |
| 1  | -1.7346                   | -0.8657 | 0.9827  | 0.1151  | 0.0296  | 0.0406  | 0.0924   | 0.1086  | 0.1729  | 0.1061  | -0.0485 | 0.1124  |
| 1  | 0.8550                    | -1.0321 | -1.0155 | 0.0977  | 0.1326  | 0.0282  | 0.0881   | 0.0839  | -0.0632 | 0.2024  | 0.0023  | 0.0774  |

Dipole mement (in D) 1.69 (DEN) 1.52 1.47 0.65 0.74 1.24 1.74 0.75 0.74 1.65

-----  
File TZVPMol399.out

Molecule PMol399 2-methyl-2-propane\_thiol

SP Mol399 B3LYP/Def2TZVP VAC.

0 15

Dipole -1.5093 -0.6830 0.0000 1.6566  
 Quadrupole -1.1625 2.0394 -0.8768 -2.0048 0.0000 0.0000

|   | Atomic coordinates (in A) |         |         | Mul.    | Lowdin  | Hirsch. | I-Hirsch | CM5     | ESP     | NPA     | AIM     | ACP     |
|---|---------------------------|---------|---------|---------|---------|---------|----------|---------|---------|---------|---------|---------|
| 6 | -0.8301                   | -0.7279 | 1.2507  | -0.3132 | -0.2890 | -0.0896 | -0.4345  | -0.2357 | -0.4848 | -0.6039 | 0.0203  | -0.2497 |
| 6 | -0.3493                   | -0.0082 | 0.0000  | 0.0995  | -0.5432 | 0.0267  | 0.2753   | 0.0051  | 0.4446  | -0.1050 | 0.0018  | 0.1308  |
| 1 | -0.4743                   | -1.7577 | 1.2811  | 0.1015  | 0.1185  | 0.0290  | 0.1114   | 0.0821  | 0.1214  | 0.2036  | -0.0030 | 0.0822  |
| 1 | -0.4861                   | -0.2292 | 2.1551  | 0.1189  | 0.1220  | 0.0302  | 0.1163   | 0.0836  | 0.1100  | 0.2135  | 0.0109  | 0.0824  |
| 1 | -1.9223                   | -0.7566 | 1.2734  | 0.0996  | 0.1220  | 0.0298  | 0.1170   | 0.0824  | 0.1390  | 0.2008  | -0.0054 | 0.0807  |
| 6 | -0.8301                   | 1.4366  | 0.0000  | -0.3445 | -0.2905 | -0.0863 | -0.4357  | -0.2318 | -0.3660 | -0.6095 | 0.0118  | -0.2466 |
| 6 | -0.8301                   | -0.7279 | -1.2507 | -0.3132 | -0.2890 | -0.0896 | -0.4345  | -0.2357 | -0.4848 | -0.6039 | 0.0202  | -0.2497 |
| 1 | -0.4842                   | 1.9747  | -0.8820 | 0.1208  | 0.1227  | 0.0325  | 0.1193   | 0.0860  | 0.1276  | 0.2118  | 0.0087  | 0.0855  |
| 1 | -1.9207                   | 1.4630  | 0.0000  | 0.1059  | 0.1246  | 0.0336  | 0.1232   | 0.0865  | 0.0854  | 0.2076  | 0.0020  | 0.0849  |

|    |         |         |         |         |        |         |         |         |         |         |         |         |
|----|---------|---------|---------|---------|--------|---------|---------|---------|---------|---------|---------|---------|
| 1  | -0.4842 | 1.9747  | 0.8820  | 0.1208  | 0.1227 | 0.0325  | 0.1193  | 0.0860  | 0.1276  | 0.2118  | 0.0087  | 0.0855  |
| 1  | -1.9223 | -0.7566 | -1.2734 | 0.0996  | 0.1220 | 0.0298  | 0.1170  | 0.0824  | 0.1390  | 0.2008  | -0.0054 | 0.0807  |
| 1  | -0.4861 | -0.2292 | -2.1551 | 0.1189  | 0.1220 | 0.0302  | 0.1163  | 0.0836  | 0.1100  | 0.2135  | 0.0109  | 0.0824  |
| 1  | -0.4743 | -1.7577 | -1.2811 | 0.1015  | 0.1185 | 0.0290  | 0.1114  | 0.0821  | 0.1214  | 0.2036  | -0.0030 | 0.0822  |
| 16 | 1.4983  | 0.0917  | 0.0000  | -0.2314 | 0.2862 | -0.0778 | -0.1179 | -0.1650 | -0.3743 | -0.0530 | -0.0276 | -0.2409 |
| 1  | 1.7179  | -1.2290 | 0.0000  | 0.1154  | 0.0303 | 0.0398  | 0.0960  | 0.1083  | 0.1838  | 0.1085  | -0.0507 | 0.1095  |

Dipole moment (in D) 1.66 (DEN) 1.54 1.60 0.53 0.51 1.15 1.75 0.80 0.95 1.64

-----  
File TZVPMol400.out  
Molecule PMol400 HSSH  
SP Mol400 B3LYP/Def2TZVP VAC.  
0 4

|                                                                            |         |         |         |         |         |         |         |         |         |         |         |         |
|----------------------------------------------------------------------------|---------|---------|---------|---------|---------|---------|---------|---------|---------|---------|---------|---------|
| Dipole                                                                     | 0.0000  | 0.0000  | 1.2184  | 1.2184  |         |         |         |         |         |         |         |         |
| Quadrupole                                                                 | -0.1666 | 0.5798  | -0.4132 | -2.0794 | 0.0000  | 0.0000  |         |         |         |         |         |         |
| Atomic coordinates (in A) Mul. Lowdin Hirsch. I-Hirsch CM5 ESP NPA AIM ACP |         |         |         |         |         |         |         |         |         |         |         |         |
| 16                                                                         | 0.0000  | 1.0211  | -0.0548 | -0.1435 | -0.0140 | -0.0465 | -0.0940 | -0.1139 | -0.1435 | -0.1151 | 0.0163  | -0.1237 |
| 16                                                                         | 0.0000  | -1.0211 | -0.0548 | -0.1435 | -0.0140 | -0.0465 | -0.0940 | -0.1139 | -0.1437 | -0.1151 | 0.0165  | -0.1237 |
| 1                                                                          | -0.9461 | 1.2291  | 0.8762  | 0.1435  | 0.0140  | 0.0465  | 0.0940  | 0.1139  | 0.1436  | 0.1151  | -0.0164 | 0.1237  |
| 1                                                                          | 0.9461  | -1.2291 | 0.8762  | 0.1435  | 0.0140  | 0.0465  | 0.0940  | 0.1139  | 0.1437  | 0.1151  | -0.0164 | 0.1237  |

Dipole moment (in D) 1.22 (DEN) 1.28 0.12 0.42 0.84 1.02 1.28 1.03 0.15 1.11

-----  
File TZVPMol401.out  
Molecule PMol401 CH3SSH  
SP Mol401 B3LYP/Def2TZVP VAC.  
0 7

|                                                                            |         |         |         |         |         |         |         |         |         |         |         |         |
|----------------------------------------------------------------------------|---------|---------|---------|---------|---------|---------|---------|---------|---------|---------|---------|---------|
| Dipole                                                                     | 1.0147  | 1.1836  | 0.7880  | 1.7468  |         |         |         |         |         |         |         |         |
| Quadrupole                                                                 | 2.0683  | -1.9468 | -0.1215 | 0.1570  | -1.6257 | 0.5903  |         |         |         |         |         |         |
| Atomic coordinates (in A) Mul. Lowdin Hirsch. I-Hirsch CM5 ESP NPA AIM ACP |         |         |         |         |         |         |         |         |         |         |         |         |
| 16                                                                         | -1.3397 | 0.2443  | -0.0881 | -0.1672 | 0.0120  | -0.0526 | -0.1102 | -0.1190 | -0.1541 | -0.1363 | -0.0064 | -0.1396 |
| 16                                                                         | 0.4625  | -0.6958 | 0.0157  | -0.0489 | 0.2091  | -0.0226 | 0.0834  | -0.0511 | -0.1312 | 0.1163  | 0.0115  | -0.0769 |
| 6                                                                          | 1.6463  | 0.6666  | -0.0052 | -0.3018 | -0.5487 | -0.0903 | -0.4579 | -0.2227 | -0.1008 | -0.7400 | -0.0989 | -0.2035 |
| 1                                                                          | -1.5597 | 0.4515  | 1.2230  | 0.1360  | 0.0130  | 0.0433  | 0.0907  | 0.1106  | 0.1528  | 0.1115  | -0.0238 | 0.1201  |
| 1                                                                          | 2.6344  | 0.2108  | -0.0481 | 0.1252  | 0.1111  | 0.0459  | 0.1386  | 0.0992  | 0.1126  | 0.2225  | 0.0395  | 0.1059  |
| 1                                                                          | 1.5751  | 1.2698  | 0.8963  | 0.1231  | 0.1005  | 0.0371  | 0.1253  | 0.0902  | 0.0476  | 0.2097  | 0.0344  | 0.0961  |
| 1                                                                          | 1.5080  | 1.2927  | -0.8823 | 0.1336  | 0.1030  | 0.0393  | 0.1300  | 0.0928  | 0.0732  | 0.2163  | 0.0433  | 0.0978  |

Dipole moment (in D) 1.75 (DEN) 1.66 1.55 0.58 0.60 1.23 1.76 0.81 0.58 1.59

-----  
File TZVPMol402.out  
Molecule PMol402 2-propanethiol  
SP Mol402 B3LYP/Def2TZVP VAC.  
0 12

Dipole -0.2367 1.6303 0.0000 1.6474

Quadrupole 2.8011 -1.8070 -0.9940 1.2432 0.0000 0.0000  
 Atomic coordinates (in A) Mul. Lowdin Hirsch. I-Hirsch CM5 ESP NPA AIM ACP  
 6 -0.0541 1.0895 1.2584 -0.3035 -0.3138 -0.0884 -0.3941 -0.2364 -0.4904 -0.5997 0.0213 -0.2462  
 6 0.4123 0.3833 0.0000 -0.0186 -0.5188 -0.0067 0.0703 -0.0655 0.2018 -0.3013 -0.0146 0.0225  
 6 -0.0541 1.0895 -1.2584 -0.3035 -0.3138 -0.0884 -0.3941 -0.2364 -0.4904 -0.5997 0.0218 -0.2462  
 16 -0.0541 -1.3869 0.0000 -0.2170 0.2606 -0.0779 -0.1238 -0.1665 -0.3410 -0.0447 -0.0133 -0.2326  
 1 0.3021 0.5928 2.1578 0.1219 0.1197 0.0311 0.1092 0.0838 0.1120 0.2150 0.0134 0.0842  
 1 -1.1437 1.1178 1.3054 0.0947 0.1176 0.0291 0.1076 0.0819 0.1458 0.1979 -0.0029 0.0818  
 1 0.2993 2.1221 1.2745 0.1031 0.1200 0.0312 0.1106 0.0831 0.1365 0.2024 -0.0029 0.0832  
 1 1.5037 0.3339 0.0000 0.0893 0.1410 0.0386 0.0903 0.0990 0.1505 0.2112 0.0184 0.0940  
 1 0.3021 0.5928 -2.1578 0.1219 0.1197 0.0311 0.1092 0.0838 0.1120 0.2150 0.0134 0.0842  
 1 -1.1437 1.1178 -1.3054 0.0947 0.1176 0.0291 0.1076 0.0819 0.1458 0.1979 -0.0029 0.0818  
 1 0.2993 2.1221 -1.2745 0.1031 0.1200 0.0312 0.1106 0.0831 0.1365 0.2024 -0.0029 0.0832  
 1 -1.3782 -1.1826 0.0000 0.1138 0.0305 0.0401 0.0967 0.1084 0.1809 0.1036 -0.0491 0.1102  
  
 Dipole mement (in D) 1.65 (DEN) 1.58 1.69 0.55 0.48 1.17 1.73 0.80 0.76 1.61

-----  
 File TZVPMol403.out

Molecule PMol403 thioacetone

SP Mol403 B3LYP/Def2TZVP VAC.

0 10

Dipole -2.8523 0.0000 0.0003 2.8523  
 Quadrupole -0.6066 0.2169 0.3897 0.0000 0.0001  
 Atomic coordinates (in A) Mul. Lowdin Hirsch. I-Hirsch CM5 ESP NPA AIM ACP  
 6 -1.0588 1.2552 0.0001 -0.3004 -0.2866 -0.0830 -0.4751 -0.2268 -0.3374 -0.6666 0.0085 -0.2420  
 6 -0.2511 0.0000 0.0001 0.0875 -0.5309 0.0612 0.3273 0.0578 0.3330 -0.0522 -0.4458 0.1505  
 6 -1.0588 -1.2552 0.0001 -0.3004 -0.2866 -0.0830 -0.4751 -0.2268 -0.3374 -0.6666 0.0087 -0.2420  
 16 1.3728 0.0000 -0.0002 -0.2291 0.3185 -0.1515 -0.2009 -0.1766 -0.2776 0.0330 0.2506 -0.2314  
 1 -0.4387 2.1452 -0.0002 0.1314 0.1249 0.0391 0.1326 0.0928 0.0784 0.2308 0.0400 0.0922  
 1 -1.7188 1.2794 0.8709 0.1199 0.1339 0.0446 0.1397 0.0967 0.1156 0.2228 0.0244 0.0952  
 1 -1.7193 1.2792 -0.8704 0.1199 0.1339 0.0445 0.1397 0.0967 0.1156 0.2227 0.0244 0.0952  
 1 -0.4387 -2.1452 0.0001 0.1314 0.1249 0.0391 0.1326 0.0928 0.0784 0.2308 0.0400 0.0922  
 1 -1.7190 -1.2793 0.8708 0.1199 0.1339 0.0445 0.1397 0.0967 0.1156 0.2228 0.0244 0.0952  
 1 -1.7191 -1.2793 -0.8705 0.1199 0.1339 0.0446 0.1397 0.0967 0.1156 0.2228 0.0244 0.0952  
  
 Dipole mement (in D) 2.85 (DEN) 3.07 0.71 1.86 2.06 2.51 2.95 1.27 1.13 2.78

-----  
 File TZVPMol404.out

Molecule PMol404 CH3S\_radical

SP Mol404 B3LYP/Def2TZVP VAC.

0 5

Dipole -1.7060 -0.0002 0.0827 1.7080  
 Quadrupole 0.5635 -1.5071 0.9436 0.0003 -0.1684 -0.0018  
 Atomic coordinates (in A) Mul. Lowdin Hirsch. I-Hirsch CM5 ESP NPA AIM ACP  
 6 -1.0919 0.0000 -0.0095 -0.3177 -0.5833 -0.0893 -0.4558 -0.2205 -0.0730 -0.7906 -0.1203 -0.2065  
 16 0.6857 0.0000 -0.0021 -0.0975 0.2494 -0.0485 0.0395 -0.0755 -0.1554 0.1149 -0.0214 -0.1087

|   |         |         |         |        |        |        |        |        |        |        |        |        |
|---|---------|---------|---------|--------|--------|--------|--------|--------|--------|--------|--------|--------|
| 1 | -1.5042 | 0.8947  | -0.4716 | 0.1364 | 0.1051 | 0.0416 | 0.1318 | 0.0942 | 0.0670 | 0.2169 | 0.0417 | 0.1007 |
| 1 | -1.4118 | -0.0013 | 1.0353  | 0.1424 | 0.1237 | 0.0545 | 0.1527 | 0.1075 | 0.0947 | 0.2419 | 0.0582 | 0.1138 |
| 1 | -1.5041 | -0.8936 | -0.4737 | 0.1364 | 0.1051 | 0.0416 | 0.1318 | 0.0942 | 0.0667 | 0.2170 | 0.0418 | 0.1007 |

Dipole moment (in D) 1.71 (DEN) 1.60 1.53 0.67 0.46 1.19 1.75 0.36 0.45 1.51

-----  
File TZVPMol405.out

Molecule PMol405 1,3-dithiane

SP Mol405 B3LYP/Def2TZVP VAC.

0 14

Dipole 0.7488 1.9878 0.0000 2.1242

Quadrupole 0.0034 3.8835 -3.8869 -2.0854 0.0000 0.0000

|    | Atomic coordinates (in A) |         |         | Mul.    | Lowdin  | Hirsch. | I-Hirsch | CM5     | ESP     | NPA     | AIM     | ACP     |
|----|---------------------------|---------|---------|---------|---------|---------|----------|---------|---------|---------|---------|---------|
| 16 | -0.0348                   | -0.6947 | 1.5252  | -0.0849 | 0.4711  | -0.0391 | 0.0784   | -0.0849 | -0.1564 | 0.2181  | 0.0179  | -0.1610 |
| 6  | 0.8053                    | -1.1641 | 0.0000  | -0.2144 | -0.6933 | -0.0638 | -0.3641  | -0.1379 | -0.3999 | -0.6959 | -0.1706 | -0.0748 |
| 6  | -0.0348                   | 1.0970  | -1.2697 | -0.2196 | -0.4680 | -0.0516 | -0.2397  | -0.1439 | -0.2175 | -0.5207 | -0.0635 | -0.1049 |
| 6  | -0.7346                   | 1.5489  | 0.0000  | -0.0976 | -0.3172 | -0.0517 | -0.1735  | -0.1584 | 0.2240  | -0.4143 | 0.0591  | -0.1341 |
| 6  | -0.0348                   | 1.0970  | 1.2697  | -0.2196 | -0.4680 | -0.0516 | -0.2397  | -0.1439 | -0.2175 | -0.5207 | -0.0643 | -0.1049 |
| 16 | -0.0348                   | -0.6947 | -1.5252 | -0.0849 | 0.4711  | -0.0391 | 0.0784   | -0.0849 | -0.1564 | 0.2181  | 0.0180  | -0.1610 |
| 1  | 1.8187                    | -0.7593 | 0.0000  | 0.1246  | 0.1086  | 0.0350  | 0.1141   | 0.0933  | 0.1736  | 0.2078  | 0.0430  | 0.0944  |
| 1  | 0.8807                    | -2.2483 | 0.0000  | 0.1444  | 0.1190  | 0.0502  | 0.1353   | 0.1089  | 0.2854  | 0.2418  | 0.0610  | 0.1135  |
| 1  | 0.9980                    | 1.4562  | -1.2863 | 0.1082  | 0.1218  | 0.0307  | 0.0971   | 0.0877  | 0.1102  | 0.1988  | 0.0134  | 0.0844  |
| 1  | -0.5252                   | 1.5081  | -2.1503 | 0.1247  | 0.1289  | 0.0424  | 0.1111   | 0.0995  | 0.1351  | 0.2264  | 0.0298  | 0.1002  |
| 1  | -0.7701                   | 2.6425  | 0.0000  | 0.0924  | 0.1388  | 0.0341  | 0.0981   | 0.0890  | -0.0433 | 0.2067  | -0.0033 | 0.0838  |
| 1  | -1.7670                   | 1.1954  | 0.0000  | 0.0938  | 0.1364  | 0.0314  | 0.0960   | 0.0884  | 0.0172  | 0.2088  | 0.0164  | 0.0797  |
| 1  | 0.9980                    | 1.4562  | 1.2863  | 0.1082  | 0.1218  | 0.0307  | 0.0971   | 0.0877  | 0.1102  | 0.1988  | 0.0134  | 0.0844  |
| 1  | -0.5252                   | 1.5081  | 2.1503  | 0.1247  | 0.1289  | 0.0424  | 0.1111   | 0.0995  | 0.1351  | 0.2264  | 0.0298  | 0.1002  |

Dipole moment (in D) 2.12 (DEN) 1.84 2.47 0.70 0.58 1.57 2.18 0.38 0.59 2.17

-----  
File TZVPMol406.out

Molecule PMol406 (CH3)3CS\_radical

SP Mol406 B3LYP/Def2TZVP VAC.

0 14

Dipole -1.8400 0.0000 0.2020 1.8511

Quadrupole -1.5872 -0.4387 2.0259 0.0000 -0.0366 -0.0003

|    | Atomic coordinates (in A) |         |         | Mul.    | Lowdin  | Hirsch. | I-Hirsch | CM5     | ESP     | NPA     | AIM     | ACP     |
|----|---------------------------|---------|---------|---------|---------|---------|----------|---------|---------|---------|---------|---------|
| 6  | -0.8617                   | -1.2537 | -0.6698 | -0.3129 | -0.2894 | -0.0899 | -0.4359  | -0.2355 | -0.5029 | -0.6000 | 0.0192  | -0.2497 |
| 6  | -0.3055                   | -0.0000 | -0.0065 | 0.1126  | -0.5808 | 0.0184  | 0.2417   | -0.0005 | 0.5928  | -0.1828 | -0.0174 | 0.1159  |
| 6  | -0.6371                   | -0.0001 | 1.4871  | -0.3533 | -0.2868 | -0.0829 | -0.4318  | -0.2281 | -0.3664 | -0.6015 | 0.0078  | -0.2422 |
| 6  | -0.8616                   | 1.2538  | -0.6696 | -0.3129 | -0.2894 | -0.0899 | -0.4359  | -0.2355 | -0.5029 | -0.6000 | 0.0193  | -0.2497 |
| 16 | 1.5168                    | -0.0000 | -0.0869 | -0.1419 | 0.3439  | -0.0408 | 0.0021   | -0.0637 | -0.2429 | 0.1020  | -0.0828 | -0.1269 |
| 1  | -0.5970                   | -1.2965 | -1.7257 | 0.1105  | 0.1207  | 0.0306  | 0.1146   | 0.0837  | 0.1427  | 0.2081  | 0.0033  | 0.0827  |
| 1  | -0.4828                   | -2.1561 | -0.1938 | 0.1151  | 0.1218  | 0.0304  | 0.1153   | 0.0839  | 0.0941  | 0.2136  | 0.0117  | 0.0825  |
| 1  | -1.9522                   | -1.2629 | -0.6025 | 0.1001  | 0.1221  | 0.0303  | 0.1180   | 0.0829  | 0.1211  | 0.2004  | -0.0046 | 0.0813  |
| 1  | -0.2436                   | 0.8833  | 1.9879  | 0.1241  | 0.1227  | 0.0328  | 0.1176   | 0.0863  | 0.1074  | 0.2132  | 0.0122  | 0.0858  |

|   |         |         |         |        |        |        |        |        |        |        |         |        |
|---|---------|---------|---------|--------|--------|--------|--------|--------|--------|--------|---------|--------|
| 1 | -1.7226 | -0.0001 | 1.6104  | 0.1086 | 0.1281 | 0.0370 | 0.1288 | 0.0898 | 0.0917 | 0.2118 | 0.0092  | 0.0880 |
| 1 | -0.2436 | -0.8835 | 1.9878  | 0.1241 | 0.1227 | 0.0328 | 0.1176 | 0.0863 | 0.1074 | 0.2132 | 0.0122  | 0.0858 |
| 1 | -1.9522 | 1.2630  | -0.6024 | 0.1001 | 0.1221 | 0.0303 | 0.1180 | 0.0829 | 0.1211 | 0.2004 | -0.0046 | 0.0813 |
| 1 | -0.4828 | 2.1562  | -0.1934 | 0.1151 | 0.1218 | 0.0304 | 0.1153 | 0.0839 | 0.0941 | 0.2136 | 0.0117  | 0.0825 |
| 1 | -0.5970 | 1.2968  | -1.7255 | 0.1105 | 0.1207 | 0.0306 | 0.1146 | 0.0837 | 0.1427 | 0.2081 | 0.0033  | 0.0827 |

Dipole moment (in D) 1.85 (DEN) 1.77 1.74 0.62 0.22 1.21 1.90 0.44 0.88 1.62

-----  
File TZVPMol407.out

Molecule PMol407 ethyl\_methyl\_sulfide

SP Mol407 B3LYP/Def2TZVP VAC.

0 12

Dipole -0.7365 1.2269 0.6805 1.5845

Quadrupole 1.5093 -0.4819 -1.0274 2.6198 -0.2779 -0.0564

|    | Atomic coordinates (in A) |         |         | Mul.    | Lowdin  | Hirsch. | I-Hirsch | CM5     | ESP     | NPA     | AIM     | ACP     |
|----|---------------------------|---------|---------|---------|---------|---------|----------|---------|---------|---------|---------|---------|
| 6  | -0.9430                   | -0.4607 | 0.4687  | -0.1688 | -0.4984 | -0.0491 | -0.1943  | -0.1442 | 0.0639  | -0.5184 | -0.0523 | -0.0976 |
| 6  | -1.7990                   | 0.5589  | -0.2500 | -0.3145 | -0.3363 | -0.0871 | -0.3470  | -0.2370 | -0.0025 | -0.6031 | 0.0225  | -0.2441 |
| 1  | -1.3744                   | 1.5599  | -0.1844 | 0.1058  | 0.1146  | 0.0293  | 0.1073   | 0.0820  | 0.0291  | 0.1980  | -0.0032 | 0.0829  |
| 1  | -2.7972                   | 0.6049  | 0.1865  | 0.1064  | 0.1183  | 0.0318  | 0.1078   | 0.0831  | -0.0141 | 0.2055  | -0.0004 | 0.0849  |
| 1  | -0.8527                   | -0.2226 | 1.5305  | 0.1074  | 0.1192  | 0.0314  | 0.0965   | 0.0877  | 0.0230  | 0.1995  | 0.0145  | 0.0866  |
| 1  | -1.9031                   | 0.3145  | -1.3057 | 0.1100  | 0.1183  | 0.0305  | 0.1075   | 0.0830  | 0.0098  | 0.2073  | 0.0095  | 0.0828  |
| 16 | 0.7189                    | -0.6775 | -0.2145 | -0.0930 | 0.4478  | -0.0465 | 0.0787   | -0.0972 | -0.2716 | 0.2011  | 0.0019  | -0.1694 |
| 1  | -1.3911                   | -1.4526 | 0.4129  | 0.1162  | 0.1263  | 0.0393  | 0.1053   | 0.0961  | 0.0646  | 0.2173  | 0.0245  | 0.0967  |
| 6  | 1.4179                    | 0.9396  | 0.1413  | -0.3499 | -0.5236 | -0.0897 | -0.4304  | -0.2233 | -0.2073 | -0.7386 | -0.0982 | -0.2095 |
| 1  | 2.4658                    | 0.9077  | -0.1441 | 0.1348  | 0.1116  | 0.0430  | 0.1314   | 0.0965  | 0.1390  | 0.2251  | 0.0366  | 0.1032  |
| 1  | 0.9357                    | 1.7325  | -0.4274 | 0.1254  | 0.0996  | 0.0330  | 0.1183   | 0.0862  | 0.0794  | 0.2031  | 0.0221  | 0.0914  |
| 1  | 1.3595                    | 1.1697  | 1.2045  | 0.1202  | 0.1026  | 0.0344  | 0.1193   | 0.0874  | 0.0867  | 0.2032  | 0.0227  | 0.0923  |

Dipole moment (in D) 1.58 (DEN) 1.22 1.79 0.44 0.26 1.08 1.61 0.12 0.23 1.48

-----  
File TZVPMol408.out

Molecule PMol408 ethyl\_methyl\_sulfide\*

SP Mol408 B3LYP/Def2TZVP VAC.

0 12

Dipole 0.9490 -1.2344 0.0000 1.5570

Quadrupole 1.5636 -0.0880 -1.4756 1.9814 0.0000 0.0000

|    | Atomic coordinates (in A) |         |         | Mul.    | Lowdin  | Hirsch. | I-Hirsch | CM5     | ESP     | NPA     | AIM     | ACP     |
|----|---------------------------|---------|---------|---------|---------|---------|----------|---------|---------|---------|---------|---------|
| 6  | -0.2274                   | -0.9844 | 0.0000  | -0.1792 | -0.4867 | -0.0500 | -0.1854  | -0.1450 | -0.0006 | -0.5103 | -0.0512 | -0.0989 |
| 6  | -1.7003                   | -1.3274 | 0.0000  | -0.3148 | -0.3385 | -0.0844 | -0.3539  | -0.2338 | -0.2050 | -0.5992 | 0.0216  | -0.2397 |
| 1  | -2.2024                   | -0.9254 | 0.8787  | 0.1137  | 0.1187  | 0.0320  | 0.1084   | 0.0845  | 0.0799  | 0.2061  | 0.0088  | 0.0850  |
| 1  | -1.8448                   | -2.4067 | 0.0000  | 0.1103  | 0.1197  | 0.0342  | 0.1121   | 0.0857  | 0.0495  | 0.2085  | 0.0039  | 0.0878  |
| 1  | 0.2689                    | -1.4003 | 0.8790  | 0.1030  | 0.1169  | 0.0308  | 0.0956   | 0.0872  | 0.0751  | 0.1971  | 0.0121  | 0.0860  |
| 1  | -2.2024                   | -0.9254 | -0.8787 | 0.1137  | 0.1187  | 0.0320  | 0.1084   | 0.0845  | 0.0799  | 0.2061  | 0.0088  | 0.0850  |
| 16 | 0.0000                    | 0.8121  | 0.0000  | -0.0874 | 0.4443  | -0.0469 | 0.0849   | -0.0976 | -0.2247 | 0.1973  | -0.0005 | -0.1706 |
| 1  | 0.2689                    | -1.4003 | -0.8790 | 0.1030  | 0.1169  | 0.0308  | 0.0956   | 0.0872  | 0.0751  | 0.1971  | 0.0121  | 0.0860  |
| 6  | 1.7948                    | 0.8711  | 0.0000  | -0.3378 | -0.5241 | -0.0893 | -0.4310  | -0.2227 | -0.2872 | -0.7327 | -0.0966 | -0.2080 |

|   |        |        |         |        |        |        |        |        |        |        |        |        |
|---|--------|--------|---------|--------|--------|--------|--------|--------|--------|--------|--------|--------|
| 1 | 2.0908 | 1.9164 | 0.0000  | 0.1327 | 0.1112 | 0.0430 | 0.1312 | 0.0964 | 0.1605 | 0.2240 | 0.0364 | 0.1031 |
| 1 | 2.2090 | 0.3960 | 0.8882  | 0.1214 | 0.1015 | 0.0338 | 0.1170 | 0.0868 | 0.0987 | 0.2029 | 0.0229 | 0.0920 |
| 1 | 2.2090 | 0.3960 | -0.8882 | 0.1214 | 0.1015 | 0.0338 | 0.1170 | 0.0868 | 0.0987 | 0.2029 | 0.0229 | 0.0920 |

Dipole mement (in D) 1.56 (DEN) 1.10 1.86 0.42 0.27 1.05 1.55 0.12 0.33 1.48

-----  
 File TZVPMol409.out  
 Molecule PMol409 dimethyl\_sulfide  
 SP Mol409 B3LYP/Def2TZVP VAC.  
 0 9

|            |                           |         |         |         |         |         |          |         |         |         |         |         |
|------------|---------------------------|---------|---------|---------|---------|---------|----------|---------|---------|---------|---------|---------|
| Dipole     | 0.0000                    | 0.0000  | -1.5378 | 1.5378  |         |         |          |         |         |         |         |         |
| Quadrupole | -1.5308                   | 2.8596  | -1.3288 | 0.0000  | 0.0000  | 0.0000  |          |         |         |         |         |         |
|            | Atomic coordinates (in A) |         |         | Mul.    | Lowdin  | Hirsch. | I-Hirsch | CM5     | ESP     | NPA     | AIM     | ACP     |
| 16         | 0.0000                    | 0.0000  | 0.6584  | -0.0780 | 0.4191  | -0.0453 | 0.1115   | -0.0972 | -0.1722 | 0.2093  | 0.0260  | -0.1608 |
| 6          | 0.0000                    | 1.3654  | -0.5088 | -0.3355 | -0.5236 | -0.0891 | -0.4263  | -0.2224 | -0.2860 | -0.7345 | -0.0962 | -0.2078 |
| 1          | 0.8881                    | 1.3507  | -1.1390 | 0.1212  | 0.1015  | 0.0343  | 0.1199   | 0.0872  | 0.1159  | 0.2031  | 0.0234  | 0.0924  |
| 1          | -0.8881                   | 1.3507  | -1.1390 | 0.1212  | 0.1015  | 0.0343  | 0.1199   | 0.0872  | 0.1125  | 0.2031  | 0.0234  | 0.0924  |
| 1          | 0.0000                    | 2.2888  | 0.0637  | 0.1320  | 0.1111  | 0.0432  | 0.1308   | 0.0967  | 0.1436  | 0.2236  | 0.0364  | 0.1034  |
| 6          | 0.0000                    | -1.3654 | -0.5088 | -0.3355 | -0.5236 | -0.0891 | -0.4263  | -0.2224 | -0.2860 | -0.7345 | -0.0964 | -0.2078 |
| 1          | 0.8881                    | -1.3507 | -1.1390 | 0.1212  | 0.1015  | 0.0343  | 0.1199   | 0.0872  | 0.1159  | 0.2031  | 0.0234  | 0.0924  |
| 1          | 0.0000                    | -2.2888 | 0.0637  | 0.1320  | 0.1111  | 0.0432  | 0.1308   | 0.0967  | 0.1436  | 0.2236  | 0.0364  | 0.1034  |
| 1          | -0.8881                   | -1.3507 | -1.1390 | 0.1212  | 0.1015  | 0.0343  | 0.1199   | 0.0872  | 0.1125  | 0.2031  | 0.0234  | 0.0924  |

Dipole mement (in D) 1.54 (DEN) 1.18 1.73 0.43 0.11 1.07 1.56 0.06 0.06 1.45

-----  
 File TZVPMol410.out  
 Molecule PMol410 diethyl\_sulfide  
 SP Mol410 B3LYP/Def2TZVP VAC.  
 0 15

|            |                           |         |         |         |         |         |          |         |         |         |         |         |
|------------|---------------------------|---------|---------|---------|---------|---------|----------|---------|---------|---------|---------|---------|
| Dipole     | 0.0000                    | 0.0000  | -1.5694 | 1.5694  |         |         |          |         |         |         |         |         |
| Quadrupole | -1.4748                   | 2.8745  | -1.3997 | 0.0000  | 0.0000  | 0.0000  |          |         |         |         |         |         |
|            | Atomic coordinates (in A) |         |         | Mul.    | Lowdin  | Hirsch. | I-Hirsch | CM5     | ESP     | NPA     | AIM     | ACP     |
| 16         | 0.0000                    | 0.0000  | 0.5610  | -0.0974 | 0.4695  | -0.0478 | 0.0573   | -0.0973 | -0.3119 | 0.1854  | -0.0272 | -0.1796 |
| 6          | 0.0000                    | 1.3790  | -0.6121 | -0.1761 | -0.4865 | -0.0499 | -0.1876  | -0.1450 | 0.0544  | -0.5081 | -0.0521 | -0.0989 |
| 6          | 0.0000                    | 2.6999  | 0.1247  | -0.3177 | -0.3385 | -0.0845 | -0.3524  | -0.2338 | -0.0958 | -0.5983 | 0.0220  | -0.2396 |
| 1          | -0.8792                   | 1.2922  | -1.2537 | 0.1027  | 0.1169  | 0.0305  | 0.0921   | 0.0868  | 0.0348  | 0.1970  | 0.0116  | 0.0858  |
| 1          | 0.8792                    | 1.2922  | -1.2537 | 0.1027  | 0.1169  | 0.0305  | 0.0921   | 0.0868  | 0.0385  | 0.1970  | 0.0116  | 0.0858  |
| 1          | 0.0000                    | 3.5332  | -0.5767 | 0.1103  | 0.1194  | 0.0338  | 0.1113   | 0.0853  | 0.0189  | 0.2080  | 0.0033  | 0.0874  |
| 1          | -0.8787                   | 2.8008  | 0.7602  | 0.1133  | 0.1186  | 0.0318  | 0.1079   | 0.0843  | 0.0535  | 0.2058  | 0.0085  | 0.0847  |
| 1          | 0.8787                    | 2.8008  | 0.7602  | 0.1133  | 0.1186  | 0.0318  | 0.1079   | 0.0843  | 0.0517  | 0.2058  | 0.0085  | 0.0847  |
| 6          | 0.0000                    | -1.3790 | -0.6121 | -0.1761 | -0.4865 | -0.0499 | -0.1876  | -0.1450 | 0.0544  | -0.5081 | -0.0521 | -0.0989 |
| 6          | 0.0000                    | -2.6999 | 0.1247  | -0.3177 | -0.3385 | -0.0845 | -0.3524  | -0.2338 | -0.0958 | -0.5983 | 0.0219  | -0.2396 |
| 1          | 0.8792                    | -1.2922 | -1.2537 | 0.1027  | 0.1169  | 0.0305  | 0.0921   | 0.0868  | 0.0385  | 0.1970  | 0.0116  | 0.0858  |
| 1          | -0.8792                   | -1.2922 | -1.2537 | 0.1027  | 0.1169  | 0.0305  | 0.0921   | 0.0868  | 0.0348  | 0.1970  | 0.0116  | 0.0858  |
| 1          | 0.0000                    | -3.5332 | -0.5767 | 0.1103  | 0.1194  | 0.0338  | 0.1113   | 0.0853  | 0.0189  | 0.2080  | 0.0033  | 0.0874  |
| 1          | 0.8787                    | -2.8008 | 0.7602  | 0.1133  | 0.1186  | 0.0318  | 0.1079   | 0.0843  | 0.0517  | 0.2058  | 0.0085  | 0.0847  |

|                      |            |         |        |        |        |        |        |        |        |        |        |        |
|----------------------|------------|---------|--------|--------|--------|--------|--------|--------|--------|--------|--------|--------|
| 1                    | -0.8787    | -2.8008 | 0.7602 | 0.1133 | 0.1186 | 0.0318 | 0.1079 | 0.0843 | 0.0535 | 0.2058 | 0.0085 | 0.0847 |
| Dipole moment (in D) | 1.57 (DEN) |         | 1.04   | 1.98   | 0.39   | 0.42   | 1.02   | 1.49   | 0.12   | 0.09   | 1.50   |        |

-----  
File TZVPMol411.out  
Molecule PMol411 hydrogen\_sulfide  
SP Mol411 B3LYP/Def2TZVP VAC.

|                      |                           |         |         |         |         |         |          |         |         |         |         |         |
|----------------------|---------------------------|---------|---------|---------|---------|---------|----------|---------|---------|---------|---------|---------|
| 0                    | 3                         |         |         |         |         |         |          |         |         |         |         |         |
| Dipole               | 0.0000                    | 0.0000  | -1.1113 | 1.1113  |         |         |          |         |         |         |         |         |
| Quadrupole           | -2.4816                   | 1.8464  | 0.6352  | 0.0000  | 0.0000  | 0.0000  |          |         |         |         |         |         |
|                      | Atomic coordinates (in A) |         |         | Mul.    | Lowdin  | Hirsch. | I-Hirsch | CM5     | ESP     | NPA     | AIM     | ACP     |
| 16                   | 0.0000                    | 0.0000  | 0.1032  | -0.2955 | -0.0501 | -0.1023 | -0.2357  | -0.2340 | -0.2837 | -0.2725 | 0.0398  | -0.2626 |
| 1                    | 0.0000                    | 0.9609  | -0.8253 | 0.1477  | 0.0250  | 0.0511  | 0.1178   | 0.1170  | 0.1419  | 0.1362  | -0.0199 | 0.1313  |
| 1                    | 0.0000                    | -0.9609 | -0.8253 | 0.1477  | 0.0250  | 0.0511  | 0.1178   | 0.1170  | 0.1419  | 0.1362  | -0.0199 | 0.1313  |
| Dipole moment (in D) | 1.11 (DEN)                |         | 1.32    | 0.22    | 0.46    | 1.05    | 1.04     | 1.27    | 1.22    | 0.18    | 1.17    |         |

-----  
File TZVPMol412.out  
Molecule PMol412 thietane  
SP Mol412 B3LYP/Def2TZVP VAC.

|                      |                           |         |         |         |         |         |          |         |         |         |         |         |
|----------------------|---------------------------|---------|---------|---------|---------|---------|----------|---------|---------|---------|---------|---------|
| 0                    | 10                        |         |         |         |         |         |          |         |         |         |         |         |
| Dipole               | -0.0001                   | -1.9406 | 0.0000  | 1.9406  |         |         |          |         |         |         |         |         |
| Quadrupole           | -0.3714                   | -1.9234 | 2.2949  | -0.0001 | 0.0000  | 0.0000  |          |         |         |         |         |         |
|                      | Atomic coordinates (in A) |         |         | Mul.    | Lowdin  | Hirsch. | I-Hirsch | CM5     | ESP     | NPA     | AIM     | ACP     |
| 6                    | -0.0000                   | -0.3305 | 1.1535  | -0.1626 | -0.4196 | -0.0485 | -0.1998  | -0.1405 | 0.2791  | -0.4850 | -0.0554 | -0.1078 |
| 1                    | 0.8822                    | -0.3557 | 1.7900  | 0.1057  | 0.1120  | 0.0322  | 0.0896   | 0.0875  | 0.0002  | 0.2018  | 0.0197  | 0.0876  |
| 1                    | -0.8823                   | -0.3556 | 1.7900  | 0.1057  | 0.1120  | 0.0322  | 0.0896   | 0.0875  | -0.0013 | 0.2018  | 0.0197  | 0.0876  |
| 6                    | -0.0000                   | -1.3384 | 0.0000  | -0.1896 | -0.2906 | -0.0432 | -0.1566  | -0.1481 | -0.5204 | -0.4079 | 0.0623  | -0.1298 |
| 1                    | -0.8753                   | -1.9860 | 0.0000  | 0.1012  | 0.1283  | 0.0346  | 0.0929   | 0.0894  | 0.1447  | 0.2047  | 0.0053  | 0.0858  |
| 1                    | 0.8752                    | -1.9860 | 0.0000  | 0.1012  | 0.1283  | 0.0346  | 0.0929   | 0.0894  | 0.1450  | 0.2047  | 0.0053  | 0.0858  |
| 6                    | -0.0000                   | -0.3305 | -1.1535 | -0.1626 | -0.4196 | -0.0485 | -0.1998  | -0.1405 | 0.2791  | -0.4850 | -0.0553 | -0.1078 |
| 1                    | 0.8822                    | -0.3557 | -1.7900 | 0.1057  | 0.1120  | 0.0322  | 0.0896   | 0.0875  | 0.0002  | 0.2018  | 0.0197  | 0.0876  |
| 1                    | -0.8823                   | -0.3556 | -1.7900 | 0.1057  | 0.1120  | 0.0322  | 0.0896   | 0.0875  | -0.0013 | 0.2018  | 0.0197  | 0.0876  |
| 16                   | 0.0001                    | 1.0869  | 0.0000  | -0.1102 | 0.4251  | -0.0577 | 0.0119   | -0.0994 | -0.3254 | 0.1610  | -0.0412 | -0.1765 |
| Dipole moment (in D) | 1.94 (DEN)                |         | 1.49    | 2.21    | 0.75    | 0.68    | 1.42     | 2.00    | 0.28    | 0.68    | 1.98    |         |

-----  
File TZVPMol413.out  
Molecule PMol413 thiacyclohexane  
SP Mol413 B3LYP/Def2TZVP VAC.

|            |                           |         |         |         |         |         |          |         |        |         |        |         |
|------------|---------------------------|---------|---------|---------|---------|---------|----------|---------|--------|---------|--------|---------|
| 0          | 16                        |         |         |         |         |         |          |         |        |         |        |         |
| Dipole     | -1.6833                   | 0.0000  | 0.5844  | 1.7819  |         |         |          |         |        |         |        |         |
| Quadrupole | -3.2372                   | 3.6037  | -0.3664 | 0.0000  | 0.3271  | 0.0000  |          |         |        |         |        |         |
|            | Atomic coordinates (in A) |         |         | Mul.    | Lowdin  | Hirsch. | I-Hirsch | CM5     | ESP    | NPA     | AIM    | ACP     |
| 6          | -0.9799                   | -1.2700 | -0.2558 | -0.1299 | -0.2910 | -0.0509 | -0.1647  | -0.1593 | 0.0522 | -0.4002 | 0.0514 | -0.1400 |

|    |         |         |         |         |         |         |         |         |         |         |         |         |
|----|---------|---------|---------|---------|---------|---------|---------|---------|---------|---------|---------|---------|
| 6  | 0.4184  | -1.3616 | 0.3273  | -0.2014 | -0.4620 | -0.0526 | -0.2316 | -0.1452 | -0.1590 | -0.5177 | -0.0648 | -0.1071 |
| 6  | 0.4184  | 1.3616  | 0.3273  | -0.2014 | -0.4620 | -0.0526 | -0.2316 | -0.1452 | -0.1590 | -0.5177 | -0.0647 | -0.1071 |
| 6  | -0.9799 | 1.2700  | -0.2558 | -0.1299 | -0.2910 | -0.0509 | -0.1647 | -0.1593 | 0.0522  | -0.4002 | 0.0512  | -0.1400 |
| 6  | -1.7059 | 0.0000  | 0.1661  | -0.1843 | -0.2679 | -0.0483 | -0.1525 | -0.1581 | 0.0014  | -0.3852 | 0.0421  | -0.1435 |
| 1  | 0.3794  | -1.3803 | 1.4200  | 0.1016  | 0.1213  | 0.0292  | 0.0920  | 0.0861  | 0.0813  | 0.1968  | 0.0104  | 0.0826  |
| 1  | 0.9242  | -2.2727 | 0.0117  | 0.1195  | 0.1261  | 0.0391  | 0.1049  | 0.0959  | 0.1320  | 0.2221  | 0.0240  | 0.0964  |
| 1  | -0.9170 | -1.3142 | -1.3463 | 0.0827  | 0.1347  | 0.0275  | 0.0863  | 0.0838  | 0.0186  | 0.1989  | -0.0034 | 0.0753  |
| 1  | -1.5546 | -2.1449 | 0.0595  | 0.0902  | 0.1344  | 0.0298  | 0.0869  | 0.0845  | -0.0113 | 0.2027  | -0.0107 | 0.0795  |
| 1  | 0.3794  | 1.3803  | 1.4200  | 0.1016  | 0.1213  | 0.0292  | 0.0920  | 0.0861  | 0.0813  | 0.1968  | 0.0104  | 0.0826  |
| 1  | 0.9242  | 2.2727  | 0.0117  | 0.1195  | 0.1261  | 0.0391  | 0.1049  | 0.0959  | 0.1320  | 0.2221  | 0.0240  | 0.0964  |
| 1  | -1.5546 | 2.1449  | 0.0595  | 0.0902  | 0.1344  | 0.0298  | 0.0869  | 0.0845  | -0.0113 | 0.2027  | -0.0107 | 0.0795  |
| 1  | -0.9170 | 1.3142  | -1.3463 | 0.0827  | 0.1347  | 0.0275  | 0.0863  | 0.0838  | 0.0186  | 0.1989  | -0.0034 | 0.0753  |
| 1  | -1.8232 | 0.0000  | 1.2556  | 0.0814  | 0.1333  | 0.0247  | 0.0802  | 0.0805  | 0.0260  | 0.1862  | -0.0208 | 0.0719  |
| 1  | -2.7174 | 0.0000  | -0.2430 | 0.0957  | 0.1341  | 0.0301  | 0.0845  | 0.0850  | -0.0050 | 0.2050  | -0.0100 | 0.0805  |
| 16 | 1.4906  | -0.0000 | -0.1973 | -0.1182 | 0.4735  | -0.0512 | 0.0396  | -0.0993 | -0.2498 | 0.1888  | -0.0266 | -0.1825 |

Dipole moment (in D) 1.78 (DEN) 1.58 2.06 0.57 0.46 1.23 1.75 0.20 0.56 1.73

-----  
File TZVPMol414.out

Molecule PMol414 dimethyl\_disulfide

SP Mol414 B3LYP/Def2TZVP VAC.

0 10

Dipole 0.0000 0.0000 2.0066 2.0066

Quadrupole -2.0950 3.7149 -1.6199 -1.4753 0.0000 0.0000

|    | Atomic coordinates (in A) |         | Mul.    | Lowdin  | Hirsch. | I-Hirsch | CM5     | ESP     | NPA     | AIM     | ACP     |         |
|----|---------------------------|---------|---------|---------|---------|----------|---------|---------|---------|---------|---------|---------|
| 16 | 0.4425                    | 0.9120  | -0.4967 | -0.0667 | 0.2343  | -0.0268  | 0.0672  | -0.0543 | -0.0944 | 0.0970  | -0.0082 | -0.0905 |
| 16 | -0.4425                   | -0.9120 | -0.4967 | -0.0667 | 0.2343  | -0.0268  | 0.0672  | -0.0543 | -0.0957 | 0.0970  | -0.0083 | -0.0905 |
| 6  | 0.4425                    | -1.8123 | 0.7974  | -0.3124 | -0.5462 | -0.0915  | -0.4553 | -0.2239 | -0.2697 | -0.7408 | -0.1001 | -0.2049 |
| 1  | 0.0360                    | -2.8224 | 0.8066  | 0.1244  | 0.1100  | 0.0443   | 0.1363  | 0.0975  | 0.1482  | 0.2215  | 0.0377  | 0.1042  |
| 1  | 0.2831                    | -1.3641 | 1.7751  | 0.1220  | 0.0995  | 0.0359   | 0.1249  | 0.0892  | 0.1124  | 0.2069  | 0.0291  | 0.0950  |
| 1  | 1.5061                    | -1.8593 | 0.5806  | 0.1328  | 0.1024  | 0.0380   | 0.1269  | 0.0915  | 0.1053  | 0.2154  | 0.0416  | 0.0962  |
| 6  | -0.4425                   | 1.8123  | 0.7974  | -0.3124 | -0.5462 | -0.0915  | -0.4553 | -0.2239 | -0.2819 | -0.7408 | -0.1002 | -0.2049 |
| 1  | -1.5061                   | 1.8593  | 0.5806  | 0.1328  | 0.1024  | 0.0380   | 0.1269  | 0.0915  | 0.1094  | 0.2154  | 0.0416  | 0.0962  |
| 1  | -0.2831                   | 1.3641  | 1.7751  | 0.1220  | 0.0995  | 0.0359   | 0.1249  | 0.0892  | 0.1166  | 0.2069  | 0.0291  | 0.0950  |
| 1  | -0.0360                   | 2.8224  | 0.8066  | 0.1244  | 0.1100  | 0.0443   | 0.1363  | 0.0975  | 0.1499  | 0.2215  | 0.0377  | 0.1042  |

Dipole moment (in D) 2.01 (DEN) 1.71 2.18 0.59 0.09 1.33 2.05 0.31 0.29 1.83

-----  
File TZVPMol415.out

Molecule PMol415 thiophene

SP Mol415 B3LYP/Def2TZVP VAC.

0 9

Dipole 0.0000 0.0000 -0.4522 0.4522

Quadrupole -4.5632 3.8277 0.7355 0.0000 0.0000 0.0000

|    | Atomic coordinates (in A) |        | Mul.   | Lowdin | Hirsch. | I-Hirsch | CM5    | ESP    | NPA    | AIM    | ACP    |         |
|----|---------------------------|--------|--------|--------|---------|----------|--------|--------|--------|--------|--------|---------|
| 16 | 0.0000                    | 0.0000 | 1.1831 | 0.0654 | 0.7117  | 0.0788   | 0.2604 | 0.0367 | 0.0423 | 0.4675 | 0.2514 | -0.0429 |



|   |        |         |         |         |         |         |         |         |         |         |         |         |
|---|--------|---------|---------|---------|---------|---------|---------|---------|---------|---------|---------|---------|
| 6 | 0.0000 | 1.2286  | -0.0026 | -0.1457 | -0.4097 | -0.0740 | -0.2712 | -0.1124 | -0.2081 | -0.4328 | -0.2370 | -0.0745 |
| 6 | 0.0000 | 0.7069  | -1.2640 | -0.1405 | -0.2110 | -0.0616 | -0.1050 | -0.1149 | -0.1322 | -0.2534 | -0.0099 | -0.0943 |
| 1 | 0.0000 | 1.3142  | -2.1577 | 0.1154  | 0.1399  | 0.0457  | 0.1129  | 0.1014  | 0.1356  | 0.2202  | 0.0465  | 0.0894  |
| 6 | 0.0000 | -1.2286 | -0.0026 | -0.1457 | -0.4097 | -0.0740 | -0.2712 | -0.1124 | -0.2081 | -0.4328 | -0.2371 | -0.0745 |
| 6 | 0.0000 | -0.7069 | -1.2640 | -0.1405 | -0.2110 | -0.0616 | -0.1050 | -0.1149 | -0.1322 | -0.2534 | -0.0099 | -0.0943 |
| 1 | 0.0000 | 2.2649  | 0.2918  | 0.1381  | 0.1249  | 0.0505  | 0.1331  | 0.1076  | 0.1836  | 0.2322  | 0.0747  | 0.1008  |
| 1 | 0.0000 | -1.3142 | -2.1577 | 0.1154  | 0.1399  | 0.0457  | 0.1129  | 0.1014  | 0.1356  | 0.2202  | 0.0465  | 0.0894  |
| 1 | 0.0000 | -2.2649 | 0.2918  | 0.1381  | 0.1249  | 0.0505  | 0.1331  | 0.1076  | 0.1836  | 0.2322  | 0.0747  | 0.1008  |

Dipole mement (in D) 0.45 (DEN) 0.08 4.07 0.39 0.79 0.19 0.45 1.83 0.80 0.67

-----  
File TZVPMol416.out

Molecule PMol416 2-methylthiophene

SP Mol416 B3LYP/Def2TZVP VAC.

0 12

Dipole -0.4231 0.4690 0.0000 0.6316

Quadrupole 4.0355 0.2901 -4.3256 -0.4788 0.0002 -0.0005

|    | Atomic coordinates (in A) |         |         | Mul.    | Lowdin  | Hirsch. | I-Hirsch | CM5     | ESP     | NPA     | AIM     | ACP     |
|----|---------------------------|---------|---------|---------|---------|---------|----------|---------|---------|---------|---------|---------|
| 6  | 1.6626                    | -0.2404 | 0.0001  | -0.1657 | -0.4104 | -0.0783 | -0.2769  | -0.1168 | -0.2775 | -0.4299 | -0.2352 | -0.0786 |
| 6  | 1.3784                    | 1.0920  | -0.0001 | -0.1327 | -0.2112 | -0.0646 | -0.1059  | -0.1177 | -0.1338 | -0.2480 | -0.0105 | -0.0966 |
| 6  | -0.0127                   | 1.3492  | -0.0002 | -0.1850 | -0.1901 | -0.0698 | -0.1865  | -0.1211 | -0.2280 | -0.2577 | -0.0175 | -0.1081 |
| 6  | -0.7779                   | 0.2163  | -0.0001 | 0.0704  | -0.4099 | -0.0221 | 0.0551   | -0.0225 | 0.1647  | -0.2104 | -0.1941 | 0.0512  |
| 16 | 0.2325                    | -1.1793 | 0.0001  | 0.0386  | 0.7226  | 0.0668  | 0.2032   | 0.0269  | -0.0130 | 0.4467  | 0.2109  | -0.0629 |
| 1  | 2.6264                    | -0.7216 | 0.0001  | 0.1359  | 0.1239  | 0.0489  | 0.1320   | 0.1059  | 0.2107  | 0.2308  | 0.0723  | 0.0989  |
| 1  | 2.1377                    | 1.8610  | -0.0001 | 0.1125  | 0.1392  | 0.0440  | 0.1124   | 0.0997  | 0.1412  | 0.2187  | 0.0435  | 0.0874  |
| 1  | -0.4456                   | 2.3407  | -0.0003 | 0.1075  | 0.1401  | 0.0412  | 0.1123   | 0.0974  | 0.1509  | 0.2154  | 0.0364  | 0.0840  |
| 6  | -2.2601                   | 0.1061  | 0.0000  | -0.3501 | -0.2891 | -0.0820 | -0.4070  | -0.2250 | -0.3629 | -0.6177 | 0.0387  | -0.2423 |
| 1  | -2.6354                   | -0.4233 | 0.8764  | 0.1243  | 0.1268  | 0.0372  | 0.1172   | 0.0894  | 0.1216  | 0.2164  | 0.0183  | 0.0873  |
| 1  | -2.7084                   | 1.0974  | -0.0011 | 0.1202  | 0.1312  | 0.0413  | 0.1267   | 0.0942  | 0.1043  | 0.2194  | 0.0193  | 0.0924  |
| 1  | -2.6354                   | -0.4251 | -0.8752 | 0.1243  | 0.1268  | 0.0372  | 0.1172   | 0.0894  | 0.1217  | 0.2164  | 0.0183  | 0.0873  |

Dipole mement (in D) 0.63 (DEN) 0.70 4.21 0.63 0.90 0.52 0.65 1.83 1.09 0.76

-----  
File TZVPMol417.out

Molecule PMol417 2,5-dihydrothiophene

SP Mol417 B3LYP/Def2TZVP VAC.

0 11

Dipole 0.0000 0.0000 -1.7548 1.7548

Quadrupole -2.3647 4.3767 -2.0121 0.0000 0.0000 0.0000

|    | Atomic coordinates (in A) |        |         | Mul.    | Lowdin  | Hirsch. | I-Hirsch | CM5     | ESP     | NPA     | AIM     | ACP     |
|----|---------------------------|--------|---------|---------|---------|---------|----------|---------|---------|---------|---------|---------|
| 16 | 0.0000                    | 0.0000 | 1.2393  | -0.1204 | 0.4655  | -0.0505 | 0.0360   | -0.0933 | -0.3226 | 0.1767  | -0.0224 | -0.1802 |
| 6  | 0.0000                    | 1.3381 | 0.0002  | -0.1363 | -0.4268 | -0.0514 | -0.2408  | -0.1387 | 0.1933  | -0.5400 | -0.0553 | -0.1053 |
| 1  | -0.8771                   | 1.9748 | 0.1347  | 0.1138  | 0.1251  | 0.0365  | 0.1003   | 0.0923  | 0.0329  | 0.2147  | 0.0295  | 0.0891  |
| 1  | 0.8771                    | 1.9748 | 0.1347  | 0.1138  | 0.1251  | 0.0365  | 0.1003   | 0.0923  | 0.0348  | 0.2147  | 0.0295  | 0.0891  |
| 6  | 0.0000                    | 0.6623 | -1.3255 | -0.1466 | -0.1957 | -0.0408 | -0.0800  | -0.0992 | -0.2374 | -0.1892 | -0.0326 | -0.0732 |
| 1  | 0.0000                    | 1.2564 | -2.2314 | 0.1155  | 0.1397  | 0.0445  | 0.1022   | 0.1000  | 0.1377  | 0.2115  | 0.0392  | 0.0904  |

|   |         |         |         |         |         |         |         |         |         |         |         |         |
|---|---------|---------|---------|---------|---------|---------|---------|---------|---------|---------|---------|---------|
| 6 | 0.0000  | -0.6623 | -1.3255 | -0.1466 | -0.1957 | -0.0408 | -0.0800 | -0.0992 | -0.2374 | -0.1892 | -0.0325 | -0.0732 |
| 1 | 0.0000  | -1.2564 | -2.2314 | 0.1155  | 0.1397  | 0.0445  | 0.1022  | 0.1000  | 0.1377  | 0.2115  | 0.0392  | 0.0904  |
| 6 | 0.0000  | -1.3381 | 0.0002  | -0.1363 | -0.4268 | -0.0514 | -0.2408 | -0.1387 | 0.1933  | -0.5400 | -0.0547 | -0.1053 |
| 1 | -0.8771 | -1.9748 | 0.1347  | 0.1138  | 0.1251  | 0.0365  | 0.1003  | 0.0923  | 0.0329  | 0.2147  | 0.0295  | 0.0891  |
| 1 | 0.8771  | -1.9748 | 0.1347  | 0.1138  | 0.1251  | 0.0365  | 0.1003  | 0.0923  | 0.0348  | 0.2147  | 0.0295  | 0.0891  |

Dipole moment (in D) 1.75 (DEN) 1.03 2.59 0.64 0.70 1.20 1.76 0.52 0.48 1.85

-----  
File TZVPMol418.out

Molecule PMol418 3-methylthiophene

SP Mol418 B3LYP/Def2TZVP VAC.

0 12

Dipole 0.8082 0.2544 0.0000 0.8473  
 Quadrupole 1.1691 2.9946 -4.1637 -1.3645 0.0000 0.0000

|    | Atomic coordinates (in A) |         |         | Mul.    | Lowdin  | Hirsch. | I-Hirsch | CM5     | ESP     | NPA     | AIM     | ACP     |
|----|---------------------------|---------|---------|---------|---------|---------|----------|---------|---------|---------|---------|---------|
| 6  | -1.0365                   | 1.1367  | 0.0000  | -0.1333 | -0.4065 | -0.0744 | -0.2609  | -0.1127 | -0.2295 | -0.4221 | -0.2364 | -0.0744 |
| 6  | 0.3229                    | 1.2364  | 0.0000  | -0.1969 | -0.1848 | -0.0650 | -0.1598  | -0.1164 | -0.2865 | -0.2494 | -0.0189 | -0.1032 |
| 6  | 0.9772                    | -0.0246 | 0.0000  | 0.0899  | -0.2390 | -0.0133 | 0.1618   | -0.0283 | 0.3347  | -0.0656 | 0.0173  | 0.0297  |
| 6  | 0.0723                    | -1.0505 | 0.0000  | -0.1834 | -0.3908 | -0.0823 | -0.3419  | -0.1186 | -0.3862 | -0.4314 | -0.2412 | -0.0886 |
| 16 | -1.5436                   | -0.4935 | -0.0000 | 0.0550  | 0.7055  | 0.0683  | 0.2552   | 0.0265  | 0.0476  | 0.4603  | 0.2420  | -0.0540 |
| 1  | -1.7645                   | 1.9310  | 0.0000  | 0.1360  | 0.1245  | 0.0497  | 0.1320   | 0.1067  | 0.2026  | 0.2309  | 0.0727  | 0.0998  |
| 1  | 0.8482                    | 2.1822  | 0.0000  | 0.1101  | 0.1411  | 0.0433  | 0.1172   | 0.0995  | 0.1656  | 0.2164  | 0.0393  | 0.0865  |
| 1  | 0.2791                    | -2.1088 | 0.0000  | 0.1295  | 0.1256  | 0.0462  | 0.1360   | 0.1036  | 0.2233  | 0.2282  | 0.0658  | 0.0957  |
| 6  | 2.4582                    | -0.1973 | 0.0000  | -0.3603 | -0.2564 | -0.0805 | -0.3877  | -0.2251 | -0.3874 | -0.6049 | 0.0260  | -0.2478 |
| 1  | 2.9149                    | 0.2674  | -0.8747 | 0.1198  | 0.1274  | 0.0358  | 0.1149   | 0.0878  | 0.1095  | 0.2129  | 0.0120  | 0.0847  |
| 1  | 2.9149                    | 0.2674  | 0.8747  | 0.1198  | 0.1274  | 0.0358  | 0.1149   | 0.0878  | 0.1095  | 0.2129  | 0.0120  | 0.0847  |
| 1  | 2.7420                    | -1.2472 | 0.0000  | 0.1138  | 0.1261  | 0.0362  | 0.1179   | 0.0889  | 0.0968  | 0.2117  | 0.0089  | 0.0869  |

Dipole moment (in D) 0.85 (DEN) 0.38 3.39 0.14 0.53 0.63 0.85 1.51 0.47 1.01

-----  
File TZVPMol419.out

Molecule PMol419 carbon monosulfide

SP Mol419 B3LYP/Def2TZVP VAC.

0 2

Dipole 0.0000 0.0000 1.9317 1.9317  
 Quadrupole 0.8313 0.8313 -1.6627 0.0000 0.0000 0.0000

|    | Atomic coordinates (in A) |        |         | Mul.    | Lowdin  | Hirsch. | I-Hirsch | CM5     | ESP     | NPA     | AIM     | ACP     |
|----|---------------------------|--------|---------|---------|---------|---------|----------|---------|---------|---------|---------|---------|
| 16 | 0.0000                    | 0.0000 | 0.4186  | 0.0815  | 0.5534  | 0.0871  | 0.1659   | 0.0647  | 0.2519  | 0.1740  | 0.7155  | 0.0411  |
| 6  | 0.0000                    | 0.0000 | -1.1163 | -0.0815 | -0.5534 | -0.0871 | -0.1660  | -0.0647 | -0.2519 | -0.1740 | -0.7155 | -0.0411 |

Dipole moment (in D) 1.93 (DEN) 0.60 4.08 0.64 1.22 0.48 1.86 1.28 5.27 0.30

-----  
File TZVPMol420.out

Molecule PMol420 methyl\_isothiocyanate

SP Mol420 B3LYP/Def2TZVP VAC.

```

0      7
Dipole      3.8737   0.0071   0.0005   3.8737
Quadrupole  3.4562  -1.7282  -1.7280  0.0088   0.0000   0.0001

      Atomic coordinates (in A)      Mul.      Lowdin      Hirsch.      I-Hirsch      CM5      ESP      NPA      AIM      ACP
6      -0.1930  -0.0023  -0.0005  0.0916  -0.5697  0.0733  0.3040  0.2043  -0.1961  0.2176  0.4799  0.2690
16     -1.7705  0.0011  0.0002  -0.2485  0.2948  -0.1704  -0.2764  -0.1864  -0.1284  -0.0629  0.3590  -0.2366
7      0.9847  -0.0044  -0.0003  -0.0546  0.1935  -0.0674  -0.2212  -0.2900  0.2785  -0.3913  -1.4627  -0.3011
6      2.3813  0.0023  0.0003  -0.2175  -0.3030  0.0020  -0.1650  -0.0759  -0.3950  -0.4031  0.4678  -0.0734
1      2.7640  1.0162  -0.1257  0.1430  0.1281  0.0542  0.1195  0.1160  0.1477  0.2132  0.0520  0.1140
1      2.7701  -0.3928  0.9400  0.1430  0.1281  0.0542  0.1195  0.1160  0.1466  0.2133  0.0520  0.1141
1      2.7718  -0.6111  -0.8131  0.1430  0.1282  0.0542  0.1195  0.1160  0.1468  0.2133  0.0520  0.1141

Dipole mement (in D)  3.87 (DEN)  4.99  0.58  3.25  3.90  3.78  3.94  2.38  2.99  4.05

```

-----  
File TZVPMol421.out

Molecule PMol421 carbon\_oxide\_sulfide  
SP Mol421 B3LYP/Def2TZVP VAC.

```

0      3
Dipole      0.0000   0.0000   0.8119   0.8119
Quadrupole  0.4508   0.4508  -0.9015  0.0000   0.0000   0.0000

      Atomic coordinates (in A)      Mul.      Lowdin      Hirsch.      I-Hirsch      CM5      ESP      NPA      AIM      ACP
6      0.0000  0.0000  -0.5199  0.2690  -0.6421  0.1744  0.4931  0.2372  0.2402  0.3899  0.5709  0.3700
8      0.0000  0.0000  -1.6779  -0.1260  0.2264  -0.1377  -0.3244  -0.1811  -0.1894  -0.4275  -1.1104  -0.2678
16     0.0000  0.0000  1.0339  -0.1429  0.4157  -0.0366  -0.1687  -0.0561  -0.0508  0.0376  0.5396  -0.1022

Dipole mement (in D)  0.81 (DEN)  0.37  1.84  0.49  0.55  0.59  0.67  2.66  10.20  0.73

```

-----  
File TZVPMol422.out

Molecule PMol422 thioformaldehyde  
SP Mol422 B3LYP/Def2TZVP VAC.

```

0      4
Dipole      0.0000   0.0000  -1.6882   1.6882
Quadrupole  -0.5809  -1.2632  1.8441  0.0000   0.0000

      Atomic coordinates (in A)      Mul.      Lowdin      Hirsch.      I-Hirsch      CM5      ESP      NPA      AIM      ACP
16     0.0000  0.0000  0.5824  -0.1246  0.3236  -0.0857  -0.0642  -0.1149  -0.1383  0.0986  0.4070  -0.1443
6      0.0000  0.0000  -1.0171  -0.1527  -0.5175  -0.0135  -0.1545  -0.0897  -0.1016  -0.4640  -0.5452  -0.0656
1      0.0000  0.9174  -1.6078  0.1386  0.0969  0.0496  0.1094  0.1023  0.1199  0.1827  0.0691  0.1049
1      0.0000  -0.9174  -1.6078  0.1386  0.0969  0.0496  0.1094  0.1023  0.1199  0.1827  0.0691  0.1049

Dipole mement (in D)  1.69 (DEN)  1.74  1.94  0.94  1.11  1.46  1.74  0.28  2.74  1.70

```

-----  
File TZVPMol423.out

Molecule PMol423 propanethial\_S-oxide  
SP Mol423 B3LYP/Def2TZVP VAC.

```

0      11

```

Dipole -3.8715 -0.7988 0.3171 3.9657  
 Quadrupole -4.7765 2.1176 2.6589 -2.3342 -0.7596 0.5435

|    | Atomic coordinates (in A) |         |         | Mul.    | Lowdin  | Hirsch. | I-Hirsch | CM5     | ESP     | NPA     | AIM     | ACP     |
|----|---------------------------|---------|---------|---------|---------|---------|----------|---------|---------|---------|---------|---------|
| 6  | -2.5551                   | 0.3632  | -0.3605 | -0.3106 | -0.2971 | -0.0785 | -0.3289  | -0.2295 | -0.1508 | -0.5797 | 0.0163  | -0.2446 |
| 1  | -3.5002                   | -0.1740 | -0.4165 | 0.1159  | 0.1206  | 0.0364  | 0.1110   | 0.0878  | 0.0440  | 0.2093  | 0.0080  | 0.0903  |
| 1  | -2.2532                   | 0.6190  | -1.3749 | 0.1124  | 0.1204  | 0.0328  | 0.1096   | 0.0849  | 0.0527  | 0.2049  | 0.0086  | 0.0825  |
| 1  | -2.7357                   | 1.2962  | 0.1725  | 0.1083  | 0.1197  | 0.0335  | 0.1101   | 0.0855  | 0.0376  | 0.2014  | 0.0030  | 0.0858  |
| 6  | -1.4904                   | -0.4757 | 0.3352  | -0.1633 | -0.3208 | -0.0421 | -0.1372  | -0.1482 | 0.1739  | -0.4324 | 0.0736  | -0.1247 |
| 1  | -1.3334                   | -1.4131 | -0.2043 | 0.0956  | 0.1368  | 0.0356  | 0.0911   | 0.0924  | -0.0185 | 0.2069  | 0.0119  | 0.0863  |
| 1  | -1.8450                   | -0.7593 | 1.3309  | 0.1091  | 0.1447  | 0.0411  | 0.1122   | 0.0960  | 0.0123  | 0.2149  | 0.0183  | 0.0891  |
| 6  | -0.1972                   | 0.2455  | 0.4768  | -0.1546 | -0.4455 | -0.0423 | -0.3371  | -0.0803 | -0.2245 | -0.5007 | -0.6334 | -0.0394 |
| 1  | -0.1566                   | 1.1831  | 1.0245  | 0.1383  | 0.1263  | 0.0591  | 0.1569   | 0.1178  | 0.1756  | 0.2279  | 0.0860  | 0.1068  |
| 16 | 1.1510                    | -0.3362 | -0.2038 | 0.4268  | 0.6655  | 0.2501  | 0.7046   | 0.2621  | 0.2731  | 1.1226  | 1.6614  | 0.2390  |
| 8  | 2.3579                    | 0.4786  | 0.0024  | -0.4776 | -0.3706 | -0.3256 | -0.5925  | -0.3684 | -0.3754 | -0.8751 | -1.2537 | -0.3710 |

Dipole mement (in D) 3.97 (DEN) 4.45 2.66 3.21 4.41 3.96 3.94 6.16 8.71 4.05

-----  
 File TZVPMol424.out

Molecule PMol424 thioacetaldehyde

SP Mol424 B3LYP/Def2TZVP VAC.

0 7

Dipole -1.6388 1.8313 0.0000 2.4575  
 Quadrupole -0.6212 0.6607 -0.0395 -0.6134 0.0000 0.0000

|    | Atomic coordinates (in A) |         |         | Mul.    | Lowdin  | Hirsch. | I-Hirsch | CM5     | ESP     | NPA     | AIM     | ACP     |
|----|---------------------------|---------|---------|---------|---------|---------|----------|---------|---------|---------|---------|---------|
| 1  | -1.9596                   | -0.2557 | 0.0000  | 0.1189  | 0.1234  | 0.0408  | 0.1308   | 0.0941  | 0.0111  | 0.2239  | 0.0392  | 0.0930  |
| 6  | -1.4762                   | 0.7170  | 0.0000  | -0.2659 | -0.3165 | -0.0795 | -0.4379  | -0.2249 | -0.0171 | -0.6705 | 0.0094  | -0.2350 |
| 6  | 0.0000                    | 0.6131  | 0.0000  | -0.0451 | -0.5121 | 0.0238  | 0.1062   | -0.0159 | 0.0645  | -0.2480 | -0.4904 | 0.0417  |
| 16 | 0.8703                    | -0.7426 | 0.0000  | -0.1795 | 0.3153  | -0.1269 | -0.1572  | -0.1540 | -0.2149 | 0.0518  | 0.3214  | -0.1960 |
| 1  | -1.8110                   | 1.2884  | 0.8694  | 0.1233  | 0.1353  | 0.0488  | 0.1385   | 0.1004  | 0.0503  | 0.2297  | 0.0329  | 0.1002  |
| 1  | -1.8110                   | 1.2884  | -0.8694 | 0.1233  | 0.1353  | 0.0488  | 0.1385   | 0.1004  | 0.0503  | 0.2297  | 0.0329  | 0.1002  |
| 1  | 0.5143                    | 1.5796  | 0.0000  | 0.1250  | 0.1192  | 0.0441  | 0.0810   | 0.1000  | 0.0559  | 0.1833  | 0.0549  | 0.0959  |

Dipole mement (in D) 2.46 (DEN) 2.65 1.34 1.58 1.83 2.16 2.52 1.00 1.84 2.42

-----  
 File TZVPMol425.out

Molecule PMol425 methylthiocyanate

SP Mol425 B3LYP/Def2TZVP VAC.

0 7

Dipole 3.6737 2.1956 0.0000 4.2798  
 Quadrupole 1.6970 -2.6671 0.9701 -3.5930 0.0000 0.0000

|    | Atomic coordinates (in A) |         |        | Mul.    | Lowdin  | Hirsch. | I-Hirsch | CM5     | ESP     | NPA     | AIM     | ACP     |
|----|---------------------------|---------|--------|---------|---------|---------|----------|---------|---------|---------|---------|---------|
| 6  | -0.8881                   | -0.5835 | 0.0000 | -0.1377 | -0.5243 | 0.0235  | 0.1747   | 0.1541  | 0.3591  | 0.0023  | 0.5695  | 0.2306  |
| 7  | -1.5367                   | -1.5485 | 0.0000 | -0.0270 | 0.0329  | -0.2153 | -0.3589  | -0.3355 | -0.4453 | -0.3060 | -1.1370 | -0.3685 |
| 16 | 0.0000                    | 0.8352  | 0.0000 | 0.0469  | 0.6068  | 0.0928  | 0.1920   | 0.0547  | -0.0517 | 0.3265  | 0.4681  | -0.0129 |
| 6  | 1.6749                    | 0.1453  | 0.0000 | -0.3263 | -0.4628 | -0.0638 | -0.4521  | -0.1972 | -0.3340 | -0.7037 | -0.0826 | -0.1891 |
| 1  | 1.8458                    | -0.4476 | 0.8925 | 0.1514  | 0.1150  | 0.0535  | 0.1474   | 0.1073  | 0.1429  | 0.2263  | 0.0632  | 0.1113  |

|   |        |         |         |        |        |        |        |        |        |        |        |        |
|---|--------|---------|---------|--------|--------|--------|--------|--------|--------|--------|--------|--------|
| 1 | 1.8458 | -0.4476 | -0.8925 | 0.1514 | 0.1150 | 0.0535 | 0.1474 | 0.1073 | 0.1429 | 0.2263 | 0.0632 | 0.1113 |
| 1 | 2.3443 | 1.0007  | 0.0000  | 0.1414 | 0.1174 | 0.0558 | 0.1497 | 0.1095 | 0.1860 | 0.2282 | 0.0561 | 0.1174 |

Dipole mement (in D) 4.28 (DEN) 2.51 3.78 3.18 3.74 4.03 4.27 4.51 11.18 4.04

-----  
File TZVPMol426.out

Molecule PMol426 thiazole

SP Mol426 B3LYP/Def2TZVP VAC.

0 8

Dipole 1.0079 1.2957 0.0000 1.6416

Quadrupole 4.4261 -1.9939 -2.4322 -3.3503 0.0000 0.0000

Atomic coordinates (in A)

Mul.

Lowdin

Hirsch.

I-Hirsch

CM5

ESP

NPA

AIM

ACP

|    |         |         |        |         |         |         |         |         |         |         |         |         |
|----|---------|---------|--------|---------|---------|---------|---------|---------|---------|---------|---------|---------|
| 16 | 0.0000  | 1.1766  | 0.0000 | 0.0575  | 0.7016  | 0.0897  | 0.2205  | 0.0572  | 0.0379  | 0.4318  | 0.2429  | -0.0191 |
| 6  | 1.2109  | -0.0249 | 0.0000 | -0.1312 | -0.4228 | -0.0762 | -0.3330 | -0.1076 | -0.3073 | -0.4646 | -0.2414 | -0.0703 |
| 6  | 0.6344  | -1.2593 | 0.0000 | -0.0779 | -0.2807 | -0.0107 | 0.0796  | 0.0096  | 0.1607  | -0.0541 | 0.4331  | 0.0540  |
| 6  | -1.1931 | -0.0647 | 0.0000 | -0.0487 | -0.4771 | 0.0002  | 0.0056  | 0.0477  | 0.1167  | -0.1686 | 0.4201  | 0.1054  |
| 7  | -0.7292 | -1.2786 | 0.0000 | -0.2148 | 0.0951  | -0.1695 | -0.3377 | -0.3610 | -0.4384 | -0.4073 | -1.0958 | -0.3945 |
| 1  | -2.2452 | 0.1807  | 0.0000 | 0.1469  | 0.1207  | 0.0582  | 0.1122  | 0.1239  | 0.1274  | 0.2139  | 0.0895  | 0.1149  |
| 1  | 2.2574  | 0.2292  | 0.0000 | 0.1419  | 0.1278  | 0.0568  | 0.1478  | 0.1141  | 0.2093  | 0.2394  | 0.0878  | 0.1076  |
| 1  | 1.1789  | -2.1928 | 0.0000 | 0.1262  | 0.1355  | 0.0515  | 0.1048  | 0.1161  | 0.0937  | 0.2096  | 0.0638  | 0.1021  |

Dipole mement (in D) 1.64 (DEN) 1.30 4.10 1.26 2.08 1.77 1.63 3.75 5.17 1.52

-----  
File TZVPMol427.out

Molecule PMol427 methanesulfonic\_acid

SP Mol427 B3LYP/Def2TZVP VAC.

0 9

Dipole -2.1133 -3.1543 -0.2083 3.8025

Quadrupole 4.9658 0.3042 -5.2700 -2.4606 -0.4979 0.8764

Atomic coordinates (in A)

Mul.

Lowdin

Hirsch.

I-Hirsch

CM5

ESP

NPA

AIM

ACP

|    |         |         |         |         |         |         |         |         |         |         |         |         |
|----|---------|---------|---------|---------|---------|---------|---------|---------|---------|---------|---------|---------|
| 6  | -1.6001 | -0.3509 | -0.0207 | -0.3248 | -0.4102 | -0.0778 | -0.7586 | -0.2068 | -0.5493 | -0.8854 | -0.1252 | -0.2104 |
| 16 | 0.0916  | 0.1393  | 0.0670  | 0.8103  | 0.5490  | 0.5047  | 2.0541  | 0.5837  | 1.0649  | 2.3800  | 3.2274  | 0.6559  |
| 8  | 0.2370  | 1.3749  | -0.6207 | -0.4042 | -0.2494 | -0.2955 | -0.7464 | -0.3460 | -0.4692 | -0.9077 | -1.3493 | -0.3742 |
| 8  | 0.7779  | -0.9823 | -0.8518 | -0.4136 | -0.1616 | -0.1935 | -0.8287 | -0.3924 | -0.5271 | -0.8835 | -1.2180 | -0.3274 |
| 8  | 0.5706  | -0.0459 | 1.4011  | -0.4384 | -0.2779 | -0.3104 | -0.7842 | -0.3639 | -0.5152 | -0.9350 | -1.3649 | -0.3837 |
| 1  | -1.7185 | -1.3349 | 0.4214  | 0.1331  | 0.1211  | 0.0578  | 0.1859  | 0.1151  | 0.1741  | 0.2367  | 0.0645  | 0.1131  |
| 1  | -1.9128 | -0.3537 | -1.0600 | 0.1505  | 0.1262  | 0.0625  | 0.1953  | 0.1202  | 0.2043  | 0.2453  | 0.0763  | 0.1158  |
| 1  | -2.1763 | 0.3809  | 0.5382  | 0.1475  | 0.1283  | 0.0656  | 0.1922  | 0.1226  | 0.2018  | 0.2474  | 0.0761  | 0.1215  |
| 1  | 1.2580  | -1.5886 | -0.2756 | 0.3396  | 0.1745  | 0.1866  | 0.4903  | 0.3675  | 0.4157  | 0.5021  | 0.6142  | 0.2894  |

Dipole mement (in D) 3.80 (DEN) 3.78 2.05 2.89 3.57 3.79 3.79 4.76 8.02 3.77

-----  
File TZVPMol428.out

Molecule PMol428 methyl\_methanesulfenate

SP Mol428 B3LYP/Def2TZVP VAC.

```

0 10
Dipole      -0.1005   1.7972  -0.8001   1.9698
Quadrupole  3.7232  -1.1730  -2.5502  -0.2126  -0.7084   0.4796
  Atomic coordinates (in A)      Mul.      Lowdin      Hirsch.      I-Hirsch      CM5      ESP      NPA      AIM      ACP
6      -1.5285   0.8143   0.0630  -0.3306  -0.5389  -0.0948  -0.4960  -0.2261  -0.4345  -0.7762  -0.1155  -0.2168
16     -0.5649  -0.6751  -0.1661   0.0831   0.4080   0.0494   0.2641   0.0429  -0.0469   0.4803   0.5532  -0.0145
8       0.8537  -0.2638   0.5830  -0.3141  -0.0941  -0.1706  -0.3190  -0.2540  -0.2221  -0.6180  -1.0785  -0.2212
6       1.7666   0.4598  -0.2321  -0.1440  -0.3930  -0.0095  -0.0967  -0.1297   0.1012  -0.2521   0.4718  -0.1005
1      -2.5104   0.6001  -0.3575   0.1251   0.1158   0.0480   0.1433   0.1017   0.1933   0.2285   0.0421   0.1078
1      -1.1121   1.6687  -0.4682   0.1223   0.0993   0.0348   0.1237   0.0887   0.1477   0.2059   0.0250   0.0930
1      -1.6470   1.0505   1.1186   0.1326   0.1041   0.0398   0.1351   0.0940   0.1619   0.2155   0.0401   0.0952
1       2.6616   0.6074   0.3693   0.1170   0.1084   0.0427   0.0979   0.1032   0.0413   0.1861   0.0315   0.0914
1       1.3667   1.4362  -0.5172   0.0968   0.0945   0.0296   0.0758   0.0891   0.0321   0.1600   0.0080   0.0826
1       2.0216  -0.0954  -1.1364   0.1118   0.0958   0.0305   0.0718   0.0902   0.0259   0.1701   0.0221   0.0829

Dipole mement (in D)   1.97 (DEN)      2.00      1.89      0.92      1.39      1.75      2.01      2.92      4.32      1.86

```

```

-----
File TZVPMol429.out
Molecule PMol429      methyl_methanesulfinate
SP Mol429 B3LYP/Def2TZVP VAC.

```

```

0 11
Dipole      -0.5136  -2.3971  -1.0171   2.6541
Quadrupole  6.3111  -4.9498  -1.3613  -3.1040  -0.4879  -1.0335
  Atomic coordinates (in A)      Mul.      Lowdin      Hirsch.      I-Hirsch      CM5      ESP      NPA      AIM      ACP
8       0.5751   1.4503   0.3720  -0.4963  -0.3600  -0.3422  -0.6811  -0.3898  -0.3840  -0.9284  -1.3134  -0.3991
16      0.4010   0.2342  -0.4176   0.5670   0.6281   0.3383   1.0956   0.3718   0.2893   1.4567   1.8478   0.3673
8      -0.8101  -0.6787   0.2504  -0.3106  -0.0632  -0.1702  -0.4253  -0.2571  -0.1944  -0.6756  -1.1057  -0.2279
6       1.6363  -0.9331   0.1556  -0.3294  -0.4697  -0.0940  -0.6544  -0.2240  -0.2887  -0.8309  -0.1545  -0.2232
6      -2.1075  -0.1388   0.0133  -0.1949  -0.3874  -0.0052  -0.1106  -0.1253  -0.0957  -0.2683   0.4509  -0.1002
1       1.4823  -1.8987  -0.3174   0.1239   0.1112   0.0486   0.1591   0.1045   0.1051   0.2286   0.0511   0.1031
1       1.5467  -1.0123   1.2359   0.1361   0.1135   0.0533   0.1779   0.1116   0.1362   0.2400   0.0708   0.1022
1       2.6098  -0.5327  -0.1130   0.1299   0.1128   0.0509   0.1597   0.1062   0.1616   0.2285   0.0491   0.1081
1      -2.8160  -0.8529   0.4219   0.1276   0.1123   0.0474   0.1110   0.1082   0.0939   0.1947   0.0412   0.0976
1      -2.2992  -0.0140  -1.0549   0.1104   0.0971   0.0330   0.0697   0.0929   0.0646   0.1700   0.0209   0.0859
1      -2.2313   0.8207   0.5167   0.1364   0.1052   0.0399   0.0983   0.1010   0.1120   0.1849   0.0417   0.0860

Dipole mement (in D)   2.65 (DEN)      3.16      2.23      2.34      4.18      2.70      2.59      5.85      8.23      2.86

```

```

-----
File TZVPMol430.out
Molecule PMol430      methane_sulfonamide
SP Mol430 B3LYP/Def2TZVP VAC.

```

```

0 10
Dipole      0.1016   3.4038   0.0000   3.4053
Quadrupole  7.4194  -3.1920  -4.2274  -1.9465  -0.0020   0.0034
  Atomic coordinates (in A)      Mul.      Lowdin      Hirsch.      I-Hirsch      CM5      ESP      NPA      AIM      ACP
7      -1.1016   1.1108  -0.0002  -0.4992  -0.2790  -0.1865  -1.0972  -0.6278  -0.8745  -1.0772  -1.2597  -0.5273

```

|    |         |         |         |         |         |         |         |         |         |         |         |         |
|----|---------|---------|---------|---------|---------|---------|---------|---------|---------|---------|---------|---------|
| 16 | -0.0439 | -0.1685 | 0.0001  | 0.8000  | 0.5793  | 0.4804  | 2.0391  | 0.5882  | 1.0968  | 2.3150  | 3.1039  | 0.6553  |
| 8  | -0.1810 | -0.8492 | -1.2521 | -0.4482 | -0.2813 | -0.3186 | -0.7715 | -0.3696 | -0.5260 | -0.9380 | -1.3672 | -0.3859 |
| 8  | -0.1804 | -0.8485 | 1.2527  | -0.4482 | -0.2813 | -0.3186 | -0.7715 | -0.3696 | -0.5261 | -0.9380 | -1.3672 | -0.3859 |
| 6  | 1.5226  | 0.6481  | -0.0005 | -0.3116 | -0.4102 | -0.0840 | -0.7433 | -0.2113 | -0.4084 | -0.8739 | -0.1268 | -0.2090 |
| 1  | -1.6694 | 1.1096  | 0.8352  | 0.2500  | 0.1530  | 0.1278  | 0.3928  | 0.3231  | 0.3900  | 0.3983  | 0.4111  | 0.2565  |
| 1  | -1.6706 | 1.1081  | -0.8347 | 0.2500  | 0.1530  | 0.1279  | 0.3929  | 0.3232  | 0.3900  | 0.3983  | 0.4112  | 0.2565  |
| 1  | 2.2872  | -0.1240 | -0.0003 | 0.1419  | 0.1246  | 0.0608  | 0.1846  | 0.1179  | 0.1482  | 0.2422  | 0.0679  | 0.1157  |
| 1  | 1.6112  | 1.2601  | 0.8917  | 0.1327  | 0.1208  | 0.0554  | 0.1870  | 0.1129  | 0.1550  | 0.2366  | 0.0633  | 0.1121  |
| 1  | 1.6109  | 1.2594  | -0.8930 | 0.1327  | 0.1208  | 0.0554  | 0.1870  | 0.1129  | 0.1550  | 0.2367  | 0.0633  | 0.1121  |

Dipole moment (in D) 3.41 (DEN) 3.60 2.11 2.96 2.81 3.27 3.41 4.29 7.11 3.25

-----  
File TZVPMol431.out

Molecule PMol431 dicyanogen\_sulfide

SP Mol431 B3LYP/Def2TZVP VAC.

0 5

Dipole 0.0000 0.0000 3.0833 3.0833

Quadrupole 3.8341 -7.0980 3.2638 0.0000 0.0000

|    | Atomic coordinates (in A) |         |         | Mul.    | Lowdin  | Hirsch. | I-Hirsch | CM5     | ESP     | NPA     | AIM     | ACP     |
|----|---------------------------|---------|---------|---------|---------|---------|----------|---------|---------|---------|---------|---------|
| 16 | 0.0000                    | 0.0000  | 0.8975  | 0.1841  | 0.7649  | 0.2271  | 0.2781   | 0.2032  | 0.1393  | 0.4516  | 0.8269  | 0.1303  |
| 6  | 0.0000                    | 1.2889  | -0.1903 | -0.1154 | -0.4663 | 0.0466  | 0.1366   | 0.1791  | 0.2749  | 0.0062  | 0.6512  | 0.2458  |
| 6  | 0.0000                    | -1.2889 | -0.1903 | -0.1154 | -0.4663 | 0.0466  | 0.1366   | 0.1791  | 0.2749  | 0.0062  | 0.6512  | 0.2458  |
| 7  | 0.0000                    | 2.2340  | -0.8626 | 0.0233  | 0.0839  | -0.1602 | -0.2756  | -0.2807 | -0.3446 | -0.2320 | -1.0647 | -0.3110 |
| 7  | 0.0000                    | -2.2340 | -0.8626 | 0.0233  | 0.0839  | -0.1602 | -0.2756  | -0.2807 | -0.3446 | -0.2320 | -1.0647 | -0.3110 |

Dipole moment (in D) 3.08 (DEN) 0.81 3.46 2.22 3.23 2.87 2.95 3.86 11.20 2.69

-----  
File TZVPMol432.out

Molecule PMol432 dimethyl\_sulfone

SP Mol432 B3LYP/Def2TZVP VAC.

0 11

Dipole 0.0000 0.0000 -4.4640 4.4640

Quadrupole -5.2813 5.8373 -0.5560 0.0000 0.0000

|    | Atomic coordinates (in A) |         |         | Mul.    | Lowdin  | Hirsch. | I-Hirsch | CM5     | ESP     | NPA     | AIM     | ACP     |
|----|---------------------------|---------|---------|---------|---------|---------|----------|---------|---------|---------|---------|---------|
| 16 | 0.0000                    | 0.0000  | 0.1941  | 0.7537  | 0.6495  | 0.4641  | 1.8708   | 0.4946  | 1.0877  | 2.2013  | 2.6576  | 0.5365  |
| 8  | -1.2468                   | 0.0000  | 0.9066  | -0.4552 | -0.2828 | -0.3227 | -0.7516  | -0.3754 | -0.5346 | -0.9369 | -1.3619 | -0.3941 |
| 8  | 1.2468                    | 0.0000  | 0.9066  | -0.4552 | -0.2828 | -0.3227 | -0.7516  | -0.3754 | -0.5354 | -0.9369 | -1.3619 | -0.3941 |
| 6  | 0.0000                    | 1.3885  | -0.9114 | -0.3418 | -0.4102 | -0.0834 | -0.7386  | -0.2143 | -0.5797 | -0.8808 | -0.1554 | -0.2151 |
| 1  | 0.0000                    | 2.2776  | -0.2868 | 0.1496  | 0.1283  | 0.0645  | 0.1925   | 0.1214  | 0.2062  | 0.2516  | 0.0768  | 0.1191  |
| 1  | 0.8959                    | 1.3731  | -1.5255 | 0.1353  | 0.1200  | 0.0548  | 0.1811   | 0.1105  | 0.1829  | 0.2327  | 0.0559  | 0.1109  |
| 1  | -0.8959                   | 1.3731  | -1.5255 | 0.1353  | 0.1200  | 0.0548  | 0.1811   | 0.1105  | 0.1818  | 0.2327  | 0.0559  | 0.1109  |
| 6  | 0.0000                    | -1.3885 | -0.9114 | -0.3418 | -0.4102 | -0.0834 | -0.7386  | -0.2143 | -0.5797 | -0.8808 | -0.1557 | -0.2151 |
| 1  | 0.8959                    | -1.3731 | -1.5255 | 0.1353  | 0.1200  | 0.0548  | 0.1811   | 0.1105  | 0.1829  | 0.2327  | 0.0559  | 0.1109  |
| 1  | 0.0000                    | -2.2776 | -0.2868 | 0.1496  | 0.1283  | 0.0645  | 0.1925   | 0.1214  | 0.2062  | 0.2516  | 0.0768  | 0.1191  |
| 1  | -0.8959                   | -1.3731 | -1.5255 | 0.1353  | 0.1200  | 0.0548  | 0.1811   | 0.1105  | 0.1818  | 0.2327  | 0.0559  | 0.1109  |

Dipole mement (in D) 4.46 (DEN) 4.65 2.14 3.43 4.17 4.51 4.48 5.91 9.87 4.63

-----  
File TZVPMol433.out

Molecule PMol433 dimethyl\_sulfoxide

SP Mol433 B3LYP/Def2TZVP VAC.

0 10

Dipole -2.4374 -3.0604 0.0000 3.9124

Quadrupole -2.5785 -1.3816 3.9602 -2.1600 0.0000 0.0000

|    | Atomic coordinates (in A) |         |         | Mul.    | Lowdin  | Hirsch. | I-Hirsch | CM5     | ESP     | NPA     | AIM     | ACP     |
|----|---------------------------|---------|---------|---------|---------|---------|----------|---------|---------|---------|---------|---------|
| 16 | -0.2542                   | 0.4308  | 0.0000  | 0.4819  | 0.6788  | 0.2825  | 0.9872   | 0.2698  | 0.2582  | 1.2566  | 1.3628  | 0.2447  |
| 8  | 1.0779                    | 1.0706  | 0.0000  | -0.5534 | -0.4052 | -0.3768 | -0.6900  | -0.4245 | -0.4157 | -0.9567 | -1.3165 | -0.4263 |
| 6  | -0.2542                   | -0.7831 | 1.3384  | -0.3487 | -0.4691 | -0.0933 | -0.6157  | -0.2264 | -0.4045 | -0.8216 | -0.1549 | -0.2199 |
| 1  | 0.6202                    | -1.4242 | 1.2443  | 0.1280  | 0.1087  | 0.0462  | 0.1619   | 0.1013  | 0.1660  | 0.2215  | 0.0474  | 0.1006  |
| 1  | -0.2050                   | -0.2336 | 2.2742  | 0.1415  | 0.1139  | 0.0502  | 0.1563   | 0.1049  | 0.1756  | 0.2318  | 0.0503  | 0.1074  |
| 6  | -0.2542                   | -0.7831 | -1.3384 | -0.3487 | -0.4691 | -0.0933 | -0.6157  | -0.2264 | -0.4045 | -0.8216 | -0.1550 | -0.2199 |
| 1  | -0.2050                   | -0.2336 | -2.2742 | 0.1415  | 0.1139  | 0.0502  | 0.1563   | 0.1049  | 0.1756  | 0.2318  | 0.0503  | 0.1074  |
| 1  | 0.6202                    | -1.4242 | -1.2443 | 0.1280  | 0.1087  | 0.0462  | 0.1619   | 0.1013  | 0.1660  | 0.2215  | 0.0474  | 0.1006  |
| 1  | -1.1685                   | -1.3722 | -1.3101 | 0.1149  | 0.1097  | 0.0441  | 0.1490   | 0.0976  | 0.1417  | 0.2183  | 0.0345  | 0.1027  |
| 1  | -1.1685                   | -1.3722 | 1.3101  | 0.1149  | 0.1097  | 0.0441  | 0.1490   | 0.0976  | 0.1417  | 0.2183  | 0.0345  | 0.1027  |

Dipole mement (in D) 3.91 (DEN) 4.42 2.61 3.10 4.51 3.89 3.93 6.59 9.22 4.06

-----  
File TZVPMol434.out

Molecule PMol434 HCl

SP Mol434 B3LYP/Def2TZVP VAC.

0 2

Dipole 0.0000 0.0000 -1.2324 1.2324

Quadrupole -1.2025 -1.2025 2.4050 0.0000 0.0000

|    | Atomic coordinates (in A) |        |         | Mul.    | Lowdin  | Hirsch. | I-Hirsch | CM5     | ESP     | NPA     | AIM     | ACP     |
|----|---------------------------|--------|---------|---------|---------|---------|----------|---------|---------|---------|---------|---------|
| 17 | 0.0000                    | 0.0000 | 0.0708  | -0.2317 | -0.0450 | -0.1218 | -0.2510  | -0.1778 | -0.2251 | -0.2578 | -0.2803 | -0.1972 |
| 1  | 0.0000                    | 0.0000 | -1.2033 | 0.2317  | 0.0450  | 0.1218  | 0.2510   | 0.1778  | 0.2251  | 0.2578  | 0.2803  | 0.1972  |

Dipole mement (in D) 1.23 (DEN) 1.42 0.28 0.75 1.54 1.09 1.38 1.58 1.72 1.21

-----  
File TZVPMol435.out

Molecule PMol435 chloromethane

SP Mol435 B3LYP/Def2TZVP VAC.

0 5

Dipole 0.0000 -1.8977 0.0000 1.8977

Quadrupole -0.5731 1.1463 -0.5732 0.0001 0.0000 0.0000

|    | Atomic coordinates (in A) |         |        | Mul.    | Lowdin  | Hirsch. | I-Hirsch | CM5     | ESP     | NPA     | AIM     | ACP     |
|----|---------------------------|---------|--------|---------|---------|---------|----------|---------|---------|---------|---------|---------|
| 17 | 0.0000                    | 0.6545  | 0.0000 | -0.1587 | 0.2287  | -0.1058 | -0.0719  | -0.1170 | -0.1396 | -0.0600 | -0.2754 | -0.1495 |
| 6  | 0.0000                    | -1.1191 | 0.0000 | -0.2486 | -0.5374 | -0.0361 | -0.2904  | -0.1817 | -0.3212 | -0.5623 | 0.1178  | -0.1550 |
| 1  | 1.0256                    | -1.4706 | 0.0000 | 0.1357  | 0.1029  | 0.0473  | 0.1208   | 0.0996  | 0.1538  | 0.2074  | 0.0526  | 0.1015  |
| 1  | -0.5128                   | -1.4707 | 0.8882 | 0.1357  | 0.1029  | 0.0473  | 0.1208   | 0.0996  | 0.1535  | 0.2074  | 0.0526  | 0.1015  |



|                      |            |         |         |        |        |        |        |        |        |        |        |        |
|----------------------|------------|---------|---------|--------|--------|--------|--------|--------|--------|--------|--------|--------|
| 1                    | -0.5128    | -1.4707 | -0.8882 | 0.1357 | 0.1029 | 0.0473 | 0.1208 | 0.0996 | 0.1535 | 0.2074 | 0.0526 | 0.1015 |
| Dipole moment (in D) | 1.90 (DEN) | 2.04    | 1.43    | 1.14   | 1.22   | 1.50   | 1.97   | 1.56   | 2.61   | 1.79   |        |        |

-----  
File TZVPMol436.out  
Molecule PMol436 dichloromethane  
SP Mol436 B3LYP/Def2TZVP VAC.

|                      |                           |         |         |         |         |         |          |         |         |         |         |         |
|----------------------|---------------------------|---------|---------|---------|---------|---------|----------|---------|---------|---------|---------|---------|
| 0                    | 5                         |         |         |         |         |         |          |         |         |         |         |         |
| Dipole               | -0.0001                   | 1.6423  | 0.0000  | 1.6423  |         |         |          |         |         |         |         |         |
| Quadrupole           | -2.1344                   | 1.8355  | 0.2989  | 0.0001  | 0.0000  | 0.0000  |          |         |         |         |         |         |
|                      | Atomic coordinates (in A) |         |         | Mul.    | Lowdin  | Hirsch. | I-Hirsch | CM5     | ESP     | NPA     | AIM     | ACP     |
| 17                   | 1.4746                    | -0.2143 | 0.0000  | -0.1043 | 0.2859  | -0.0703 | -0.0735  | -0.0781 | -0.0528 | -0.0184 | -0.2191 | -0.1216 |
| 6                    | 0.0000                    | 0.7573  | 0.0000  | -0.0932 | -0.7835 | 0.0278  | -0.0736  | -0.0697 | -0.3396 | -0.3959 | 0.2486  | 0.0296  |
| 17                   | -1.4746                   | -0.2142 | 0.0000  | -0.1043 | 0.2859  | -0.0703 | -0.0735  | -0.0781 | -0.0531 | -0.0184 | -0.2191 | -0.1216 |
| 1                    | 0.0000                    | 1.3707  | 0.8929  | 0.1509  | 0.1059  | 0.0564  | 0.1103   | 0.1129  | 0.2227  | 0.2163  | 0.0948  | 0.1068  |
| 1                    | 0.0000                    | 1.3707  | -0.8929 | 0.1509  | 0.1059  | 0.0564  | 0.1103   | 0.1129  | 0.2227  | 0.2163  | 0.0948  | 0.1068  |
| Dipole moment (in D) | 1.64 (DEN)                | 1.86    | 2.04    | 0.99    | 1.34    | 1.39    | 1.81     | 1.45    | 2.60    | 1.76    |         |         |

-----  
File TZVPMol437.out  
Molecule PMol437 trichloromethane  
SP Mol437 B3LYP/Def2TZVP VAC.

|                      |                           |         |         |         |         |         |          |         |         |         |         |         |
|----------------------|---------------------------|---------|---------|---------|---------|---------|----------|---------|---------|---------|---------|---------|
| 0                    | 5                         |         |         |         |         |         |          |         |         |         |         |         |
| Dipole               | -0.9099                   | 0.5777  | 0.0000  | 1.0778  |         |         |          |         |         |         |         |         |
| Quadrupole           | 0.8037                    | -0.0983 | -0.7054 | -0.9585 | 0.0000  | 0.0000  |          |         |         |         |         |         |
|                      | Atomic coordinates (in A) |         |         | Mul.    | Lowdin  | Hirsch. | I-Hirsch | CM5     | ESP     | NPA     | AIM     | ACP     |
| 1                    | -1.2944                   | 0.8214  | 0.0000  | 0.1596  | 0.1078  | 0.0603  | 0.0902   | 0.1212  | 0.3198  | 0.2253  | 0.1325  | 0.1065  |
| 6                    | -0.3805                   | 0.2414  | 0.0000  | 0.0213  | -1.0854 | 0.0791  | 0.1485   | 0.0298  | -0.4769 | -0.2902 | 0.3674  | 0.2056  |
| 17                   | 0.9715                    | 1.3759  | 0.0000  | -0.0603 | 0.3259  | -0.0465 | -0.0795  | -0.0503 | 0.0532  | 0.0216  | -0.1666 | -0.1041 |
| 17                   | -0.3805                   | -0.7547 | 1.4571  | -0.0603 | 0.3258  | -0.0465 | -0.0796  | -0.0504 | 0.0520  | 0.0216  | -0.1665 | -0.1040 |
| 17                   | -0.3805                   | -0.7547 | -1.4571 | -0.0603 | 0.3258  | -0.0465 | -0.0796  | -0.0504 | 0.0520  | 0.0216  | -0.1665 | -0.1040 |
| Dipole moment (in D) | 1.08 (DEN)                | 1.29    | 1.95    | 0.67    | 1.08    | 1.02    | 1.26     | 1.01    | 1.97    | 1.35    |         |         |

-----  
File TZVPMol438.out  
Molecule PMol438 chloroethane  
SP Mol438 B3LYP/Def2TZVP VAC.

|            |                           |         |        |         |         |         |          |         |         |         |         |         |
|------------|---------------------------|---------|--------|---------|---------|---------|----------|---------|---------|---------|---------|---------|
| 0          | 8                         |         |        |         |         |         |          |         |         |         |         |         |
| Dipole     | 1.0996                    | 1.7575  | 0.0000 | 2.0731  |         |         |          |         |         |         |         |         |
| Quadrupole | -0.6560                   | 0.5804  | 0.0756 | -0.2976 | 0.0000  | 0.0000  |          |         |         |         |         |         |
|            | Atomic coordinates (in A) |         |        | Mul.    | Lowdin  | Hirsch. | I-Hirsch | CM5     | ESP     | NPA     | AIM     | ACP     |
| 17         | -0.8176                   | -0.7877 | 0.0000 | -0.1739 | 0.2426  | -0.1122 | -0.1098  | -0.1219 | -0.1974 | -0.0816 | -0.2973 | -0.1594 |
| 6          | 0.0000                    | 0.8092  | 0.0000 | -0.1048 | -0.5100 | -0.0001 | -0.0436  | -0.1070 | -0.0229 | -0.3477 | 0.1376  | -0.0459 |
| 6          | 1.4959                    | 0.6621  | 0.0000 | -0.3003 | -0.3363 | -0.0837 | -0.3853  | -0.2342 | -0.0943 | -0.6096 | 0.0313  | -0.2448 |
| 1          | -0.3616                   | 1.3345  | 0.8803 | 0.1216  | 0.1195  | 0.0426  | 0.0945   | 0.0981  | 0.0851  | 0.2035  | 0.0421  | 0.0935  |

|   |         |        |         |        |        |        |        |        |        |        |        |        |
|---|---------|--------|---------|--------|--------|--------|--------|--------|--------|--------|--------|--------|
| 1 | -0.3616 | 1.3345 | -0.8803 | 0.1216 | 0.1195 | 0.0426 | 0.0945 | 0.0981 | 0.0851 | 0.2035 | 0.0421 | 0.0935 |
| 1 | 1.9645  | 1.6466 | 0.0000  | 0.1056 | 0.1234 | 0.0383 | 0.1172 | 0.0898 | 0.0410 | 0.2100 | 0.0085 | 0.0916 |
| 1 | 1.8416  | 0.1239 | -0.8800 | 0.1152 | 0.1207 | 0.0362 | 0.1162 | 0.0886 | 0.0517 | 0.2110 | 0.0178 | 0.0858 |
| 1 | 1.8416  | 0.1239 | 0.8800  | 0.1152 | 0.1207 | 0.0362 | 0.1162 | 0.0886 | 0.0517 | 0.2110 | 0.0178 | 0.0858 |

Dipole mement (in D) 2.07 (DEN) 2.15 1.40 1.26 1.39 1.63 2.14 1.81 2.90 1.91

-----  
 File TZVPMol439.out  
 Molecule PMol439 1,1-dichloroethane  
 SP Mol439 B3LYP/Def2TZVP VAC.  
 0 8

|            |                           |         |         |         |         |         |          |         |         |         |         |         |
|------------|---------------------------|---------|---------|---------|---------|---------|----------|---------|---------|---------|---------|---------|
| Dipole     | 0.2763                    | 2.0335  | 0.0000  | 2.0522  |         |         |          |         |         |         |         |         |
| Quadrupole | 0.7093                    | 1.5332  | -2.2425 | -0.1134 | 0.0000  | 0.0000  |          |         |         |         |         |         |
|            | Atomic coordinates (in A) |         |         | Mul.    | Lowdin  | Hirsch. | I-Hirsch | CM5     | ESP     | NPA     | AIM     | ACP     |
| 6          | 0.9640                    | 1.4343  | 0.0000  | -0.2959 | -0.3378 | -0.0872 | -0.4929  | -0.2347 | -0.1751 | -0.6244 | 0.0456  | -0.2480 |
| 1          | 1.8992                    | 0.8802  | 0.0000  | 0.1233  | 0.1262  | 0.0419  | 0.1365   | 0.0955  | 0.1108  | 0.2229  | 0.0386  | 0.0874  |
| 1          | 0.9346                    | 2.0661  | 0.8854  | 0.1193  | 0.1272  | 0.0428  | 0.1356   | 0.0956  | 0.0935  | 0.2219  | 0.0294  | 0.0924  |
| 1          | 0.9346                    | 2.0661  | -0.8854 | 0.1193  | 0.1272  | 0.0428  | 0.1356   | 0.0956  | 0.0935  | 0.2219  | 0.0294  | 0.0924  |
| 6          | -0.2097                   | 0.4995  | 0.0000  | 0.0385  | -0.7675 | 0.0626  | 0.1871   | 0.0031  | -0.1653 | -0.1889 | 0.2433  | 0.1391  |
| 1          | -1.1634                   | 1.0173  | 0.0000  | 0.1362  | 0.1243  | 0.0514  | 0.0840   | 0.1113  | 0.2051  | 0.2167  | 0.0879  | 0.0991  |
| 17         | -0.2097                   | -0.5186 | -1.4667 | -0.1204 | 0.3003  | -0.0772 | -0.0931  | -0.0832 | -0.0813 | -0.0351 | -0.2372 | -0.1312 |
| 17         | -0.2097                   | -0.5186 | 1.4667  | -0.1204 | 0.3003  | -0.0772 | -0.0931  | -0.0832 | -0.0813 | -0.0351 | -0.2372 | -0.1312 |

Dipole mement (in D) 2.05 (DEN) 2.23 2.01 1.22 1.23 1.66 2.14 1.83 3.31 1.97

-----  
 File TZVPMol440.out  
 Molecule PMol440 1,1,1-trichloroethane  
 SP Mol440 B3LYP/Def2TZVP VAC.  
 0 8

|            |                           |         |         |         |         |         |          |         |         |         |         |         |
|------------|---------------------------|---------|---------|---------|---------|---------|----------|---------|---------|---------|---------|---------|
| Dipole     | -0.6629                   | 1.6748  | 0.0000  | 1.8012  |         |         |          |         |         |         |         |         |
| Quadrupole | -0.5982                   | 1.6066  | -1.0084 | -1.0338 | 0.0000  | 0.0000  |          |         |         |         |         |         |
|            | Atomic coordinates (in A) |         |         | Mul.    | Lowdin  | Hirsch. | I-Hirsch | CM5     | ESP     | NPA     | AIM     | ACP     |
| 17         | 1.6913                    | 0.2811  | 0.0000  | -0.0789 | 0.3399  | -0.0533 | -0.0858  | -0.0554 | 0.0194  | 0.0097  | -0.1813 | -0.1129 |
| 6          | -0.0926                   | 0.2341  | 0.0000  | 0.1654  | -1.0641 | 0.1167  | 0.4061   | 0.1053  | -0.2107 | -0.0799 | 0.3445  | 0.3181  |
| 6          | -0.6463                   | 1.6333  | 0.0000  | -0.3118 | -0.3443 | -0.0922 | -0.6036  | -0.2367 | -0.3996 | -0.6407 | 0.0637  | -0.2522 |
| 17         | -0.6463                   | -0.6443 | 1.4514  | -0.0789 | 0.3399  | -0.0534 | -0.0859  | -0.0554 | 0.0211  | 0.0097  | -0.1813 | -0.1129 |
| 17         | -0.6463                   | -0.6443 | -1.4514 | -0.0789 | 0.3399  | -0.0534 | -0.0859  | -0.0554 | 0.0211  | 0.0097  | -0.1813 | -0.1129 |
| 1          | -1.7328                   | 1.5977  | 0.0000  | 0.1277  | 0.1296  | 0.0452  | 0.1517   | 0.0992  | 0.1801  | 0.2305  | 0.0454  | 0.0909  |
| 1          | -0.3054                   | 2.1624  | -0.8862 | 0.1277  | 0.1296  | 0.0452  | 0.1517   | 0.0992  | 0.1843  | 0.2305  | 0.0454  | 0.0909  |
| 1          | -0.3054                   | 2.1624  | 0.8862  | 0.1277  | 0.1296  | 0.0452  | 0.1517   | 0.0992  | 0.1843  | 0.2305  | 0.0454  | 0.0909  |

Dipole mement (in D) 1.80 (DEN) 1.89 2.00 1.02 0.49 1.45 1.86 1.50 3.29 1.63

-----  
 File TZVPMol441.out  
 Molecule PMol441 pentachloroethane

SP Mol1441 B3LYP/Def2TZVP VAC.

0 8

|                      |                           |         |         |         |         |         |          |         |         |         |         |         |
|----------------------|---------------------------|---------|---------|---------|---------|---------|----------|---------|---------|---------|---------|---------|
| Dipole               | -0.8564                   | -0.2296 | 0.0000  | 0.8866  |         |         |          |         |         |         |         |         |
| Quadrupole           | 2.0013                    | -1.9400 | -0.0614 | 0.3743  | 0.0000  | 0.0000  |          |         |         |         |         |         |
|                      | Atomic coordinates (in A) |         |         | Mul.    | Lowdin  | Hirsch. | I-Hirsch | CM5     | ESP     | NPA     | AIM     | ACP     |
| 17                   | 1.8300                    | -0.3188 | 0.0000  | -0.0431 | 0.3850  | -0.0303 | -0.0728  | -0.0302 | 0.2023  | 0.0542  | -0.1348 | -0.1003 |
| 6                    | 0.0909                    | -0.6100 | 0.0000  | 0.1412  | -1.1219 | 0.0974  | 0.2657   | 0.0932  | -0.5617 | -0.1450 | 0.3763  | 0.3023  |
| 6                    | -0.7057                   | 0.7168  | 0.0000  | -0.0105 | -0.8492 | 0.0358  | -0.0298  | -0.0128 | -0.5389 | -0.2906 | 0.2881  | 0.1191  |
| 17                   | -0.3773                   | -1.5366 | 1.4421  | -0.0519 | 0.3713  | -0.0338 | -0.0788  | -0.0348 | 0.1479  | 0.0429  | -0.1486 | -0.0983 |
| 17                   | -0.3773                   | -1.5366 | -1.4421 | -0.0519 | 0.3713  | -0.0338 | -0.0788  | -0.0348 | 0.1479  | 0.0429  | -0.1486 | -0.0983 |
| 1                    | -1.7634                   | 0.4661  | 0.0000  | 0.1598  | 0.1325  | 0.0549  | 0.1027   | 0.1171  | 0.4084  | 0.2434  | 0.1204  | 0.0943  |
| 17                   | -0.3773                   | 1.6634  | -1.4526 | -0.0718 | 0.3555  | -0.0452 | -0.0543  | -0.0490 | 0.0970  | 0.0261  | -0.1768 | -0.1094 |
| 17                   | -0.3773                   | 1.6634  | 1.4526  | -0.0718 | 0.3555  | -0.0452 | -0.0543  | -0.0490 | 0.0970  | 0.0261  | -0.1768 | -0.1094 |
| Dipole mement (in D) | 0.89 (DEN)                |         | 1.25    | 2.03    | 0.57    | 0.85    | 0.91     | 1.02    | 0.97    | 1.86    | 1.27    |         |

-----  
File TZVPMol1442.out

Molecule PMol1442 cyclopropylchloride

SP Mol1442 B3LYP/Def2TZVP VAC.

0 9

|                      |                           |         |         |         |         |         |          |         |         |         |         |         |
|----------------------|---------------------------|---------|---------|---------|---------|---------|----------|---------|---------|---------|---------|---------|
| Dipole               | 1.4181                    | -1.2807 | 0.0000  | 1.9108  |         |         |          |         |         |         |         |         |
| Quadrupole           | 1.5783                    | -1.1641 | -0.4143 | 0.6504  | 0.0000  | 0.0000  |          |         |         |         |         |         |
|                      | Atomic coordinates (in A) |         |         | Mul.    | Lowdin  | Hirsch. | I-Hirsch | CM5     | ESP     | NPA     | AIM     | ACP     |
| 6                    | 0.5931                    | -1.1837 | 0.7507  | -0.2173 | -0.2346 | -0.0672 | -0.2712  | -0.1737 | -0.2681 | -0.4152 | -0.0273 | -0.1709 |
| 6                    | 0.5931                    | 0.0990  | 0.0000  | 0.0001  | -0.4934 | -0.0016 | 0.0365   | -0.0630 | -0.1035 | -0.2227 | 0.0856  | 0.0189  |
| 6                    | 0.5931                    | -1.1837 | -0.7507 | -0.2173 | -0.2346 | -0.0672 | -0.2712  | -0.1737 | -0.2681 | -0.4152 | -0.0273 | -0.1709 |
| 1                    | 1.4948                    | -1.4576 | 1.2798  | 0.1110  | 0.1292  | 0.0442  | 0.1223   | 0.0990  | 0.1427  | 0.2147  | 0.0348  | 0.0953  |
| 1                    | -0.3222                   | -1.4673 | 1.2480  | 0.1193  | 0.1322  | 0.0449  | 0.1265   | 0.1009  | 0.1557  | 0.2227  | 0.0500  | 0.0911  |
| 1                    | 1.4834                    | 0.7088  | 0.0000  | 0.1243  | 0.1301  | 0.0491  | 0.1002   | 0.1077  | 0.1736  | 0.2195  | 0.0663  | 0.0963  |
| 1                    | -0.3222                   | -1.4673 | -1.2480 | 0.1193  | 0.1322  | 0.0449  | 0.1265   | 0.1009  | 0.1557  | 0.2227  | 0.0500  | 0.0911  |
| 1                    | 1.4948                    | -1.4576 | -1.2798 | 0.1110  | 0.1292  | 0.0442  | 0.1223   | 0.0990  | 0.1427  | 0.2147  | 0.0348  | 0.0953  |
| 17                   | -0.8532                   | 1.1031  | 0.0000  | -0.1504 | 0.3097  | -0.0913 | -0.0918  | -0.0971 | -0.1307 | -0.0411 | -0.2661 | -0.1462 |
| Dipole mement (in D) | 1.91 (DEN)                |         | 1.88    | 1.84    | 1.16    | 1.15    | 1.50     | 2.00    | 1.51    | 2.84    | 1.83    |         |

-----  
File TZVPMol1443.out

Molecule PMol1443 1-chloropropane(gauche)

SP Mol1443 B3LYP/Def2TZVP VAC.

0 11

|            |                           |        |         |         |         |         |          |         |         |         |        |         |
|------------|---------------------------|--------|---------|---------|---------|---------|----------|---------|---------|---------|--------|---------|
| Dipole     | -1.5997                   | 1.2602 | 0.2816  | 2.0558  |         |         |          |         |         |         |        |         |
| Quadrupole | -1.6488                   | 1.2315 | 0.4173  | 0.1974  | 0.1328  | 0.4424  |          |         |         |         |        |         |
|            | Atomic coordinates (in A) |        |         | Mul.    | Lowdin  | Hirsch. | I-Hirsch | CM5     | ESP     | NPA     | AIM    | ACP     |
| 6          | 0.1796                    | 0.8843 | 0.3039  | -0.1111 | -0.4815 | -0.0016 | -0.0754  | -0.1069 | -0.2457 | -0.3433 | 0.1280 | -0.0510 |
| 1          | 0.0982                    | 0.9110 | 1.3892  | 0.1171  | 0.1218  | 0.0410  | 0.0938   | 0.0970  | 0.1337  | 0.2012  | 0.0391 | 0.0909  |
| 1          | 0.5822                    | 1.8355 | -0.0337 | 0.1290  | 0.1213  | 0.0426  | 0.0918   | 0.0982  | 0.1253  | 0.2089  | 0.0418 | 0.0936  |
| 6          | -1.1424                   | 0.5643 | -0.3501 | -0.1346 | -0.3249 | -0.0459 | -0.1655  | -0.1576 | 0.2503  | -0.4087 | 0.0667 | -0.1339 |

|    |         |         |         |         |         |         |         |         |         |         |         |         |
|----|---------|---------|---------|---------|---------|---------|---------|---------|---------|---------|---------|---------|
| 1  | -1.0082 | 0.5334  | -1.4330 | 0.0971  | 0.1358  | 0.0329  | 0.0944  | 0.0885  | -0.0085 | 0.2042  | 0.0062  | 0.0793  |
| 1  | -1.8060 | 1.4113  | -0.1522 | 0.0892  | 0.1391  | 0.0354  | 0.0964  | 0.0902  | -0.0249 | 0.2042  | -0.0025 | 0.0852  |
| 6  | -1.7755 | -0.7210 | 0.1423  | -0.3406 | -0.3133 | -0.0867 | -0.3448 | -0.2381 | -0.2532 | -0.5951 | 0.0125  | -0.2511 |
| 1  | -1.9382 | -0.6957 | 1.2204  | 0.0981  | 0.1173  | 0.0287  | 0.1013  | 0.0806  | 0.0663  | 0.1958  | -0.0073 | 0.0803  |
| 1  | -1.1395 | -1.5786 | -0.0712 | 0.1231  | 0.1188  | 0.0265  | 0.1009  | 0.0795  | 0.0699  | 0.2130  | 0.0166  | 0.0722  |
| 1  | -2.7394 | -0.8967 | -0.3313 | 0.1126  | 0.1184  | 0.0320  | 0.1070  | 0.0836  | 0.0538  | 0.2069  | -0.0004 | 0.0857  |
| 17 | 1.4342  | -0.3462 | -0.0685 | -0.1798 | 0.2472  | -0.1050 | -0.1000 | -0.1151 | -0.1670 | -0.0869 | -0.3002 | -0.1510 |

Dipole mement (in D) 2.06 (DEN) 2.13 1.53 1.21 1.42 1.58 2.10 1.79 2.85 1.91

-----  
File TZVPMol444.out

Molecule PMol444 1-chloropropane(trans)

SP Mol444 B3LYP/Def2TZVP VAC.

0 11

Dipole 2.1284 0.2507 0.0000 2.1431

Quadrupole -1.9666 1.0183 0.9483 0.1380 0.0000 0.0000

|    | Atomic coordinates (in A) |         |         | Mul.    | Lowdin  | Hirsch. | I-Hirsch | CM5     | ESP     | NPA     | AIM     | ACP     |
|----|---------------------------|---------|---------|---------|---------|---------|----------|---------|---------|---------|---------|---------|
| 6  | 0.0000                    | 0.5785  | 0.0000  | -0.1095 | -0.4877 | -0.0034 | -0.0748  | -0.1084 | -0.2300 | -0.3448 | 0.1296  | -0.0516 |
| 1  | 0.1586                    | 1.1983  | 0.8807  | 0.1186  | 0.1211  | 0.0408  | 0.0940   | 0.0968  | 0.1263  | 0.2017  | 0.0386  | 0.0902  |
| 1  | 0.1586                    | 1.1983  | -0.8807 | 0.1186  | 0.1211  | 0.0408  | 0.0940   | 0.0968  | 0.1263  | 0.2017  | 0.0386  | 0.0902  |
| 6  | 0.8987                    | -0.6337 | 0.0000  | -0.1395 | -0.3256 | -0.0480 | -0.1731  | -0.1599 | 0.3095  | -0.4080 | 0.0693  | -0.1369 |
| 1  | 0.6717                    | -1.2491 | -0.8719 | 0.0972  | 0.1344  | 0.0325  | 0.0945   | 0.0881  | -0.0301 | 0.2036  | 0.0064  | 0.0783  |
| 1  | 0.6717                    | -1.2491 | 0.8719  | 0.0972  | 0.1344  | 0.0325  | 0.0945   | 0.0881  | -0.0301 | 0.2036  | 0.0064  | 0.0783  |
| 6  | 2.3621                    | -0.2296 | 0.0000  | -0.3440 | -0.3053 | -0.0801 | -0.3271  | -0.2319 | -0.2889 | -0.5887 | 0.0092  | -0.2455 |
| 1  | 2.6138                    | 0.3655  | 0.8782  | 0.1066  | 0.1181  | 0.0305  | 0.1014   | 0.0823  | 0.0655  | 0.1979  | -0.0037 | 0.0829  |
| 1  | 2.6138                    | 0.3655  | -0.8782 | 0.1066  | 0.1181  | 0.0305  | 0.1014   | 0.0823  | 0.0655  | 0.1979  | -0.0037 | 0.0829  |
| 1  | 3.0135                    | -1.1012 | 0.0000  | 0.1194  | 0.1210  | 0.0355  | 0.1103   | 0.0870  | 0.0676  | 0.2115  | 0.0068  | 0.0894  |
| 17 | -1.7333                   | 0.1283  | 0.0000  | -0.1713 | 0.2506  | -0.1115 | -0.1150  | -0.1212 | -0.1817 | -0.0763 | -0.2976 | -0.1582 |

Dipole mement (in D) 2.14 (DEN) 2.16 1.23 1.37 1.43 1.75 2.22 1.88 3.00 1.99

-----  
File TZVPMol445.out

Molecule PMol445 1,3-dichloropropane

SP Mol445 B3LYP/Def2TZVP VAC.

0 11

Dipole 0.0000 0.0000 -1.8433 1.8433

Quadrupole 3.6423 -8.0416 4.3992 0.0000 0.0000 0.0000

|   | Atomic coordinates (in A) |         |         | Mul.    | Lowdin  | Hirsch. | I-Hirsch | CM5     | ESP     | NPA     | AIM    | ACP     |
|---|---------------------------|---------|---------|---------|---------|---------|----------|---------|---------|---------|--------|---------|
| 6 | 0.0000                    | 1.2413  | -0.6800 | -0.1284 | -0.4880 | -0.0021 | -0.0773  | -0.1068 | -0.3024 | -0.3522 | 0.1285 | -0.0513 |
| 1 | 0.8809                    | 1.2920  | -1.3173 | 0.1241  | 0.1225  | 0.0432  | 0.0960   | 0.0993  | 0.1428  | 0.2051  | 0.0424 | 0.0930  |
| 1 | -0.8809                   | 1.2920  | -1.3173 | 0.1241  | 0.1225  | 0.0432  | 0.0960   | 0.0993  | 0.1426  | 0.2051  | 0.0424 | 0.0930  |
| 6 | 0.0000                    | 0.0000  | 0.1836  | -0.1551 | -0.3311 | -0.0532 | -0.2669  | -0.1620 | 0.3743  | -0.4264 | 0.0751 | -0.1422 |
| 1 | -0.8739                   | 0.0000  | 0.8352  | 0.1119  | 0.1398  | 0.0378  | 0.1087   | 0.0945  | -0.0219 | 0.2137  | 0.0277 | 0.0797  |
| 1 | 0.8739                    | 0.0000  | 0.8352  | 0.1119  | 0.1398  | 0.0378  | 0.1087   | 0.0945  | -0.0208 | 0.2137  | 0.0277 | 0.0797  |
| 6 | 0.0000                    | -1.2413 | -0.6800 | -0.1284 | -0.4880 | -0.0021 | -0.0773  | -0.1068 | -0.3024 | -0.3522 | 0.1287 | -0.0513 |
| 1 | 0.8809                    | -1.2920 | -1.3173 | 0.1241  | 0.1225  | 0.0432  | 0.0960   | 0.0993  | 0.1428  | 0.2051  | 0.0424 | 0.0930  |

|    |         |         |         |         |        |         |         |         |         |         |         |         |
|----|---------|---------|---------|---------|--------|---------|---------|---------|---------|---------|---------|---------|
| 1  | -0.8809 | -1.2920 | -1.3173 | 0.1241  | 0.1225 | 0.0432  | 0.0960  | 0.0993  | 0.1426  | 0.2051  | 0.0424  | 0.0930  |
| 17 | 0.0000  | -2.7246 | 0.3135  | -0.1542 | 0.2687 | -0.0956 | -0.0901 | -0.1053 | -0.1488 | -0.0584 | -0.2787 | -0.1433 |
| 17 | 0.0000  | 2.7246  | 0.3135  | -0.1542 | 0.2687 | -0.0956 | -0.0901 | -0.1053 | -0.1488 | -0.0584 | -0.2787 | -0.1433 |

Dipole mement (in D) 1.84 (DEN) 2.00 1.73 1.11 1.56 1.52 1.93 1.73 2.46 1.94

-----  
File TZVPMol446.out

Molecule PMol446 2-chloropropane

SP Mol446 B3LYP/Def2TZVP VAC.

0 11

Dipole -1.6814 -1.3845 0.0000 2.1781

Quadrupole 0.2477 -0.7139 0.4661 -0.7029 0.0000 0.0000

|    | Atomic coordinates (in A) |         |         | Mul.    | Lowdin  | Hirsch. | I-Hirsch | CM5     | ESP     | NPA     | AIM     | ACP     |
|----|---------------------------|---------|---------|---------|---------|---------|----------|---------|---------|---------|---------|---------|
| 6  | -0.5697                   | -0.8965 | 1.2607  | -0.3085 | -0.3099 | -0.0863 | -0.4303  | -0.2351 | -0.3708 | -0.6078 | 0.0275  | -0.2498 |
| 1  | -1.4650                   | -1.5192 | 1.2931  | 0.1031  | 0.1243  | 0.0361  | 0.1212   | 0.0882  | 0.1114  | 0.2073  | 0.0045  | 0.0882  |
| 1  | 0.2979                    | -1.5545 | 1.2940  | 0.1106  | 0.1228  | 0.0348  | 0.1217   | 0.0878  | 0.1200  | 0.2088  | 0.0148  | 0.0835  |
| 6  | -0.5697                   | -0.0693 | 0.0000  | 0.0344  | -0.5121 | 0.0351  | 0.1776   | -0.0337 | 0.2231  | -0.1520 | 0.1464  | 0.0641  |
| 1  | -1.4095                   | 0.6246  | 0.0000  | 0.1036  | 0.1366  | 0.0399  | 0.0773   | 0.0988  | 0.0701  | 0.2040  | 0.0361  | 0.0879  |
| 6  | -0.5697                   | -0.8965 | -1.2607 | -0.3085 | -0.3099 | -0.0863 | -0.4303  | -0.2351 | -0.3708 | -0.6078 | 0.0273  | -0.2498 |
| 1  | -1.4650                   | -1.5192 | -1.2931 | 0.1031  | 0.1243  | 0.0361  | 0.1212   | 0.0882  | 0.1114  | 0.2073  | 0.0045  | 0.0882  |
| 1  | 0.2979                    | -1.5545 | -1.2940 | 0.1106  | 0.1228  | 0.0348  | 0.1217   | 0.0878  | 0.1200  | 0.2088  | 0.0148  | 0.0835  |
| 1  | -0.5568                   | -0.2741 | -2.1520 | 0.1222  | 0.1221  | 0.0359  | 0.1189   | 0.0885  | 0.1029  | 0.2173  | 0.0188  | 0.0854  |
| 17 | 0.8889                    | 1.0144  | 0.0000  | -0.1929 | 0.2570  | -0.1159 | -0.1179  | -0.1240 | -0.2204 | -0.1031 | -0.3138 | -0.1666 |
| 1  | -0.5568                   | -0.2741 | 2.1520  | 0.1222  | 0.1221  | 0.0359  | 0.1189   | 0.0885  | 0.1029  | 0.2173  | 0.0188  | 0.0854  |

Dipole mement (in D) 2.18 (DEN) 2.26 1.33 1.31 1.30 1.69 2.28 2.05 3.04 1.97

-----  
File TZVPMol447.out

Molecule PMol447 1-chloro-2-methylpropane

SP Mol447 B3LYP/Def2TZVP VAC.

0 14

Dipole 1.9549 -0.6021 0.2344 2.0589

Quadrupole -2.4579 1.3243 1.1336 -0.0393 -0.3493 -0.3213

|   | Atomic coordinates (in A) |         |         | Mul.    | Lowdin  | Hirsch. | I-Hirsch | CM5     | ESP     | NPA     | AIM     | ACP     |
|---|---------------------------|---------|---------|---------|---------|---------|----------|---------|---------|---------|---------|---------|
| 6 | 2.1364                    | -0.7517 | -0.0434 | -0.3455 | -0.2791 | -0.0815 | -0.3647  | -0.2316 | -0.4766 | -0.5849 | 0.0037  | -0.2494 |
| 6 | 0.8516                    | 0.0134  | -0.3336 | -0.0023 | -0.3471 | -0.0134 | 0.0527   | -0.0873 | 0.5208  | -0.2363 | 0.0918  | -0.0266 |
| 1 | 0.6764                    | 0.0060  | -1.4139 | 0.0706  | 0.1498  | 0.0310  | 0.0789   | 0.0901  | -0.0293 | 0.1965  | -0.0007 | 0.0738  |
| 1 | 2.0902                    | -1.7808 | -0.3996 | 0.1115  | 0.1192  | 0.0305  | 0.1015   | 0.0825  | 0.1040  | 0.2032  | -0.0042 | 0.0831  |
| 1 | 2.9907                    | -0.2745 | -0.5213 | 0.1161  | 0.1226  | 0.0342  | 0.1123   | 0.0863  | 0.1153  | 0.2102  | 0.0043  | 0.0869  |
| 1 | 2.3411                    | -0.7823 | 1.0286  | 0.1036  | 0.1203  | 0.0295  | 0.1043   | 0.0819  | 0.1072  | 0.1971  | -0.0054 | 0.0805  |
| 6 | 0.9500                    | 1.4545  | 0.1351  | -0.3431 | -0.2878 | -0.0885 | -0.3834  | -0.2380 | -0.4251 | -0.5922 | 0.0060  | -0.2557 |
| 6 | -0.3029                   | -0.7204 | 0.3210  | -0.1076 | -0.4619 | -0.0040 | -0.1067  | -0.1071 | -0.4008 | -0.3390 | 0.1228  | -0.0554 |
| 1 | 0.0367                    | 2.0083  | -0.0739 | 0.1278  | 0.1195  | 0.0257  | 0.1003   | 0.0791  | 0.1003  | 0.2187  | 0.0179  | 0.0713  |
| 1 | 1.1264                    | 1.5008  | 1.2119  | 0.0950  | 0.1196  | 0.0277  | 0.1042   | 0.0802  | 0.1077  | 0.1944  | -0.0095 | 0.0780  |
| 1 | 1.7754                    | 1.9706  | -0.3534 | 0.1085  | 0.1201  | 0.0308  | 0.1090   | 0.0829  | 0.0911  | 0.2048  | -0.0036 | 0.0833  |
| 1 | -0.2200                   | -0.6968 | 1.4077  | 0.1167  | 0.1240  | 0.0398  | 0.0962   | 0.0964  | 0.1719  | 0.2014  | 0.0373  | 0.0883  |

|                      |         |            |         |         |        |         |         |         |         |         |         |         |
|----------------------|---------|------------|---------|---------|--------|---------|---------|---------|---------|---------|---------|---------|
| 1                    | -0.3456 | -1.7605    | 0.0048  | 0.1248  | 0.1236 | 0.0407  | 0.0936  | 0.0971  | 0.1664  | 0.2080  | 0.0393  | 0.0902  |
| 17                   | -1.8989 | -0.0097    | -0.0803 | -0.1760 | 0.2572 | -0.1023 | -0.0981 | -0.1126 | -0.1528 | -0.0818 | -0.2992 | -0.1481 |
| Dipole mement (in D) |         | 2.06 (DEN) | 2.13    | 1.28    | 1.28   | 1.33    | 1.67    | 2.13    | 1.91    | 2.87    | 1.94    |         |

-----  
File TZVPMol448.out

Molecule PMol448 2-chlorobutane

SP Mol448 B3LYP/Def2TZVP VAC.

0 14

|                      |                           |            |         |         |         |         |          |         |         |         |         |         |
|----------------------|---------------------------|------------|---------|---------|---------|---------|----------|---------|---------|---------|---------|---------|
| Dipole               | 0.7283                    | 1.9814     | 0.3599  | 2.1415  |         |         |          |         |         |         |         |         |
| Quadrupole           | -0.1229                   | -0.5594    | 0.6823  | -1.1355 | -0.3234 | 0.3851  |          |         |         |         |         |         |
|                      | Atomic coordinates (in A) |            |         | Mul.    | Lowdin  | Hirsch. | I-Hirsch | CM5     | ESP     | NPA     | AIM     | ACP     |
| 6                    | -1.3485                   | 1.4316     | -0.0131 | -0.3088 | -0.3088 | -0.0867 | -0.4370  | -0.2355 | -0.4146 | -0.6056 | 0.0274  | -0.2498 |
| 6                    | -0.2733                   | 0.4432     | 0.3600  | 0.0355  | -0.4824 | 0.0339  | 0.1531   | -0.0332 | 0.1161  | -0.1445 | 0.1364  | 0.0591  |
| 6                    | 1.0565                    | 0.7204     | -0.3097 | -0.1435 | -0.2996 | -0.0481 | -0.2046  | -0.1579 | 0.1070  | -0.4057 | 0.0617  | -0.1385 |
| 17                   | -0.8426                   | -1.2309    | -0.0702 | -0.1989 | 0.2629  | -0.1065 | -0.1078  | -0.1151 | -0.2109 | -0.1080 | -0.3157 | -0.1563 |
| 6                    | 2.1787                    | -0.2048    | 0.1096  | -0.3349 | -0.3123 | -0.0877 | -0.3448  | -0.2390 | -0.2912 | -0.5917 | 0.0132  | -0.2516 |
| 1                    | -1.0473                   | 2.4364     | 0.2874  | 0.1042  | 0.1241  | 0.0356  | 0.1184   | 0.0878  | 0.1157  | 0.2074  | 0.0040  | 0.0880  |
| 1                    | -1.5135                   | 1.4381     | -1.0898 | 0.1113  | 0.1232  | 0.0346  | 0.1192   | 0.0876  | 0.1185  | 0.2094  | 0.0147  | 0.0834  |
| 1                    | -2.2939                   | 1.2016     | 0.4719  | 0.1237  | 0.1221  | 0.0356  | 0.1192   | 0.0883  | 0.1266  | 0.2177  | 0.0190  | 0.0850  |
| 1                    | -0.1459                   | 0.4023     | 1.4427  | 0.0986  | 0.1384  | 0.0386  | 0.0765   | 0.0981  | 0.0831  | 0.2026  | 0.0335  | 0.0857  |
| 1                    | 0.9155                    | 0.6895     | -1.3931 | 0.0936  | 0.1377  | 0.0317  | 0.0994   | 0.0879  | 0.0215  | 0.1997  | 0.0037  | 0.0772  |
| 1                    | 1.3164                    | 1.7567     | -0.0706 | 0.0854  | 0.1408  | 0.0334  | 0.1006   | 0.0890  | 0.0112  | 0.2022  | -0.0058 | 0.0818  |
| 1                    | 3.1178                    | 0.0689     | -0.3677 | 0.1118  | 0.1182  | 0.0315  | 0.1075   | 0.0830  | 0.0787  | 0.2064  | -0.0014 | 0.0851  |
| 1                    | 2.3373                    | -0.1731    | 1.1883  | 0.0977  | 0.1175  | 0.0283  | 0.1006   | 0.0802  | 0.0634  | 0.1958  | -0.0079 | 0.0798  |
| 1                    | 1.9577                    | -1.2369    | -0.1573 | 0.1243  | 0.1184  | 0.0255  | 0.0998   | 0.0787  | 0.0750  | 0.2141  | 0.0182  | 0.0713  |
| Dipole mement (in D) |                           | 2.14 (DEN) | 2.22    | 1.44    | 1.24    | 1.28    | 1.63     | 2.23    | 2.02    | 2.95    | 1.96    |         |

-----  
File TZVPMol449.out

Molecule PMol449 1-chlorobutane

SP Mol449 B3LYP/Def2TZVP VAC.

0 14

|            |                           |         |         |         |         |         |          |         |         |         |         |         |
|------------|---------------------------|---------|---------|---------|---------|---------|----------|---------|---------|---------|---------|---------|
| Dipole     | -1.8003                   | 1.3144  | 0.0000  | 2.2291  |         |         |          |         |         |         |         |         |
| Quadrupole | -0.2344                   | -1.5595 | 1.7940  | 2.4784  | 0.0000  | 0.0000  |          |         |         |         |         |         |
|            | Atomic coordinates (in A) |         |         | Mul.    | Lowdin  | Hirsch. | I-Hirsch | CM5     | ESP     | NPA     | AIM     | ACP     |
| 6          | -0.1775                   | -0.9833 | 0.0000  | -0.0995 | -0.4852 | -0.0035 | -0.0761  | -0.1085 | -0.2436 | -0.3412 | 0.1292  | -0.0516 |
| 6          | 0.0000                    | 0.5141  | 0.0000  | -0.1640 | -0.3011 | -0.0504 | -0.2096  | -0.1606 | 0.1517  | -0.4032 | 0.0600  | -0.1423 |
| 1          | -0.7174                   | -1.3263 | 0.8806  | 0.1194  | 0.1213  | 0.0406  | 0.0917   | 0.0966  | 0.1258  | 0.2022  | 0.0385  | 0.0901  |
| 1          | -0.7174                   | -1.3263 | -0.8806 | 0.1194  | 0.1213  | 0.0406  | 0.0917   | 0.0966  | 0.1258  | 0.2022  | 0.0385  | 0.0901  |
| 6          | -1.3374                   | 1.2400  | 0.0000  | -0.1639 | -0.2905 | -0.0425 | -0.1137  | -0.1554 | 0.2269  | -0.3810 | 0.0501  | -0.1352 |
| 1          | 0.5875                    | 0.8104  | 0.8721  | 0.0946  | 0.1362  | 0.0313  | 0.0951   | 0.0875  | -0.0096 | 0.1990  | 0.0034  | 0.0757  |
| 6          | -1.1802                   | 2.7482  | 0.0000  | -0.3271 | -0.3067 | -0.0817 | -0.3280  | -0.2336 | -0.2845 | -0.5824 | 0.0161  | -0.2459 |
| 1          | -1.9209                   | 0.9279  | -0.8708 | 0.0865  | 0.1322  | 0.0279  | 0.0820   | 0.0830  | -0.0497 | 0.1910  | -0.0151 | 0.0766  |
| 1          | -1.9209                   | 0.9279  | 0.8708  | 0.0865  | 0.1322  | 0.0279  | 0.0820   | 0.0830  | -0.0497 | 0.1910  | -0.0151 | 0.0766  |
| 1          | -2.1428                   | 3.2567  | 0.0000  | 0.1140  | 0.1177  | 0.0312  | 0.1018   | 0.0826  | 0.0722  | 0.2051  | -0.0014 | 0.0849  |

|                      |         |            |         |         |        |         |         |         |         |         |         |         |
|----------------------|---------|------------|---------|---------|--------|---------|---------|---------|---------|---------|---------|---------|
| 1                    | -0.6300 | 3.0893     | 0.8773  | 0.1056  | 0.1180 | 0.0297  | 0.1010  | 0.0815  | 0.0569  | 0.1975  | -0.0048 | 0.0821  |
| 1                    | -0.6300 | 3.0893     | -0.8773 | 0.1056  | 0.1180 | 0.0297  | 0.1010  | 0.0815  | 0.0569  | 0.1975  | -0.0048 | 0.0821  |
| 1                    | 0.5875  | 0.8104     | -0.8721 | 0.0946  | 0.1362 | 0.0313  | 0.0951  | 0.0875  | -0.0096 | 0.1990  | 0.0034  | 0.0757  |
| 17                   | 1.3927  | -1.8455    | 0.0000  | -0.1717 | 0.2502 | -0.1122 | -0.1140 | -0.1219 | -0.1695 | -0.0767 | -0.2979 | -0.1589 |
| Dipole mement (in D) |         | 2.23 (DEN) | 2.21    | 1.32    | 1.45   | 1.56    | 1.81    | 2.28    | 1.91    | 3.11    | 2.07    |         |

-----  
 File TZVPMol450.out  
 Molecule PMol450 2-chloro-2-methylpropane  
 SP Mol450 B3LYP/Def2TZVP VAC.  
 0 14

|                           |         |            |         |         |         |          |         |         |         |         |         |         |
|---------------------------|---------|------------|---------|---------|---------|----------|---------|---------|---------|---------|---------|---------|
| Dipole                    | -2.2461 | 0.0000     | 0.0000  | 2.2461  |         |          |         |         |         |         |         |         |
| Quadrupole                | -1.4500 | 0.7250     | 0.7250  | 0.0004  | 0.0000  | 0.0000   |         |         |         |         |         |         |
| Atomic coordinates (in A) |         |            | Mul.    | Lowdin  | Hirsch. | I-Hirsch | CM5     | ESP     | NPA     | AIM     | ACP     |         |
| 6                         | -0.8080 | 1.4474     | 0.0000  | -0.3168 | -0.2844 | -0.0878  | -0.4717 | -0.2347 | -0.4694 | -0.6125 | 0.0271  | -0.2539 |
| 6                         | -0.3644 | -0.0000    | 0.0000  | 0.1506  | -0.5405 | 0.0695   | 0.3903  | 0.0385  | 0.4438  | 0.0444  | 0.1447  | 0.1749  |
| 1                         | -0.4475 | 1.9733     | 0.8817  | 0.1181  | 0.1241  | 0.0347   | 0.1259  | 0.0880  | 0.1322  | 0.2152  | 0.0158  | 0.0837  |
| 1                         | -0.4475 | 1.9733     | -0.8817 | 0.1181  | 0.1241  | 0.0347   | 0.1259  | 0.0880  | 0.1322  | 0.2152  | 0.0158  | 0.0837  |
| 1                         | -1.8987 | 1.4950     | 0.0000  | 0.1017  | 0.1257  | 0.0344   | 0.1273  | 0.0872  | 0.1334  | 0.2058  | 0.0015  | 0.0855  |
| 6                         | -0.8080 | -0.7237    | -1.2535 | -0.3166 | -0.2844 | -0.0877  | -0.4716 | -0.2347 | -0.4584 | -0.6125 | 0.0273  | -0.2539 |
| 6                         | -0.8080 | -0.7237    | 1.2535  | -0.3166 | -0.2844 | -0.0877  | -0.4716 | -0.2347 | -0.4584 | -0.6125 | 0.0275  | -0.2539 |
| 1                         | -0.4479 | -1.7505    | -1.2679 | 0.1181  | 0.1241  | 0.0347   | 0.1259  | 0.0880  | 0.1281  | 0.2152  | 0.0158  | 0.0837  |
| 1                         | -1.8987 | -0.7472    | -1.2949 | 0.1017  | 0.1257  | 0.0344   | 0.1273  | 0.0872  | 0.1320  | 0.2058  | 0.0015  | 0.0855  |
| 1                         | -0.4472 | -0.2234    | -2.1499 | 0.1181  | 0.1241  | 0.0347   | 0.1259  | 0.0880  | 0.1293  | 0.2152  | 0.0158  | 0.0837  |
| 1                         | -1.8987 | -0.7472    | 1.2949  | 0.1017  | 0.1257  | 0.0344   | 0.1273  | 0.0872  | 0.1320  | 0.2058  | 0.0015  | 0.0855  |
| 1                         | -0.4472 | -0.2234    | 2.1499  | 0.1181  | 0.1241  | 0.0347   | 0.1259  | 0.0880  | 0.1293  | 0.2152  | 0.0158  | 0.0837  |
| 1                         | -0.4479 | -1.7505    | 1.2679  | 0.1181  | 0.1241  | 0.0347   | 0.1259  | 0.0880  | 0.1281  | 0.2152  | 0.0158  | 0.0837  |
| 17                        | 1.4771  | 0.0001     | 0.0000  | -0.2141 | 0.2721  | -0.1176  | -0.1126 | -0.1239 | -0.2342 | -0.1158 | -0.3260 | -0.1719 |
| Dipole mement (in D)      |         | 2.25 (DEN) | 2.40    | 1.15    | 1.32    | 1.10     | 1.73    | 2.36    | 2.17    | 3.13    | 1.99    |         |

-----  
 File TZVPMol451.out  
 Molecule PMol451 1-chloropentane  
 SP Mol451 B3LYP/Def2TZVP VAC.  
 0 17

|                           |         |         |         |         |         |          |         |         |         |         |         |         |
|---------------------------|---------|---------|---------|---------|---------|----------|---------|---------|---------|---------|---------|---------|
| Dipole                    | 1.5072  | -1.6623 | 0.0000  | 2.2439  |         |          |         |         |         |         |         |         |
| Quadrupole                | -2.0965 | -0.7257 | 2.8223  | 4.0181  | 0.0000  | 0.0000   |         |         |         |         |         |         |
| Atomic coordinates (in A) |         |         | Mul.    | Lowdin  | Hirsch. | I-Hirsch | CM5     | ESP     | NPA     | AIM     | ACP     |         |
| 6                         | 0.0000  | 0.3765  | 0.0000  | -0.1500 | -0.2988 | -0.0505  | -0.2129 | -0.1607 | 0.1878  | -0.4009 | 0.0596  | -0.1422 |
| 6                         | 0.8074  | -0.9122 | 0.0000  | -0.2012 | -0.2654 | -0.0445  | -0.1452 | -0.1557 | -0.0030 | -0.3759 | 0.0397  | -0.1403 |
| 1                         | 0.2580  | 0.9815  | 0.8723  | 0.0952  | 0.1365  | 0.0312   | 0.0931  | 0.0874  | -0.0204 | 0.1994  | 0.0034  | 0.0757  |
| 1                         | 0.2580  | 0.9815  | -0.8723 | 0.0952  | 0.1365  | 0.0312   | 0.0931  | 0.0874  | -0.0204 | 0.1994  | 0.0034  | 0.0757  |
| 6                         | 2.3086  | -0.6758 | 0.0000  | -0.1396 | -0.2913 | -0.0433  | -0.1204 | -0.1564 | 0.2361  | -0.3768 | 0.0560  | -0.1352 |
| 1                         | 0.5350  | -1.5174 | 0.8711  | 0.0844  | 0.1340  | 0.0268   | 0.0823  | 0.0826  | -0.0150 | 0.1866  | -0.0177 | 0.0741  |
| 1                         | 0.5350  | -1.5174 | -0.8711 | 0.0844  | 0.1340  | 0.0268   | 0.0823  | 0.0826  | -0.0150 | 0.1866  | -0.0177 | 0.0741  |
| 6                         | 3.1101  | -1.9626 | 0.0000  | -0.3264 | -0.3089 | -0.0838  | -0.3291 | -0.2356 | -0.2540 | -0.5838 | 0.0140  | -0.2474 |

|                                                                              |         |         |         |         |         |         |         |         |         |         |         |         |
|------------------------------------------------------------------------------|---------|---------|---------|---------|---------|---------|---------|---------|---------|---------|---------|---------|
| 1                                                                            | 2.5770  | -0.0702 | -0.8701 | 0.0860  | 0.1326  | 0.0276  | 0.0831  | 0.0828  | -0.0533 | 0.1910  | -0.0150 | 0.0764  |
| 1                                                                            | 2.5770  | -0.0702 | 0.8701  | 0.0860  | 0.1326  | 0.0276  | 0.0831  | 0.0828  | -0.0533 | 0.1910  | -0.0150 | 0.0764  |
| 1                                                                            | 4.1826  | -1.7751 | 0.0000  | 0.1136  | 0.1173  | 0.0304  | 0.1009  | 0.0817  | 0.0599  | 0.2048  | -0.0027 | 0.0839  |
| 1                                                                            | 2.8855  | -2.5704 | 0.8773  | 0.1023  | 0.1168  | 0.0277  | 0.0974  | 0.0795  | 0.0513  | 0.1955  | -0.0083 | 0.0799  |
| 1                                                                            | 2.8855  | -2.5704 | -0.8773 | 0.1023  | 0.1168  | 0.0277  | 0.0974  | 0.0795  | 0.0513  | 0.1955  | -0.0083 | 0.0799  |
| 6                                                                            | -1.4830 | 0.1040  | 0.0000  | -0.0999 | -0.4847 | -0.0035 | -0.0740 | -0.1085 | -0.2246 | -0.3399 | 0.1295  | -0.0516 |
| 1                                                                            | -1.7909 | -0.4567 | -0.8806 | 0.1199  | 0.1213  | 0.0405  | 0.0918  | 0.0966  | 0.1235  | 0.2024  | 0.0385  | 0.0900  |
| 1                                                                            | -1.7909 | -0.4567 | 0.8806  | 0.1199  | 0.1213  | 0.0405  | 0.0918  | 0.0966  | 0.1235  | 0.2024  | 0.0385  | 0.0900  |
| 17                                                                           | -2.4453 | 1.6154  | 0.0000  | -0.1722 | 0.2495  | -0.1128 | -0.1148 | -0.1225 | -0.1745 | -0.0773 | -0.2986 | -0.1594 |
| Dipole mement (in D) 2.24 (DEN) 2.16 1.14 1.49 1.54 1.86 2.31 1.96 3.14 2.10 |         |         |         |         |         |         |         |         |         |         |         |         |

-----  
File TZVPMol452.out

Molecule PMol452 chlorocyclohexane(axial)

SP Mol452 B3LYP/Def2TZVP VAC.

0 18

Dipole -2.1258 0.0009 0.0000 2.1258

Quadrupole -2.3753 1.2951 1.0802 1.9953 0.0000 0.0000

|    | Atomic coordinates (in A) |         |         | Mul.    | Lowdin  | Hirsch. | I-Hirsch | CM5     | ESP     | NPA     | AIM     | ACP     |
|----|---------------------------|---------|---------|---------|---------|---------|----------|---------|---------|---------|---------|---------|
| 6  | -0.6086                   | 1.0222  | 1.2563  | -0.1854 | -0.2636 | -0.0512 | -0.1614  | -0.1610 | 0.0153  | -0.3936 | 0.0392  | -0.1490 |
| 6  | -1.2699                   | 1.5725  | 0.0000  | -0.1688 | -0.2603 | -0.0487 | -0.1501  | -0.1588 | -0.0061 | -0.3862 | 0.0395  | -0.1459 |
| 6  | -0.6086                   | 1.0222  | -1.2563 | -0.1854 | -0.2636 | -0.0512 | -0.1614  | -0.1610 | 0.0153  | -0.3936 | 0.0400  | -0.1490 |
| 6  | -0.6086                   | -0.4992 | -1.2583 | -0.1726 | -0.2652 | -0.0515 | -0.2431  | -0.1587 | -0.0673 | -0.4111 | 0.0494  | -0.1479 |
| 6  | 0.0088                    | -1.0802 | 0.0000  | 0.0444  | -0.4456 | 0.0315  | 0.1288   | -0.0330 | -0.0948 | -0.1408 | 0.1230  | 0.0503  |
| 6  | -0.6086                   | -0.4992 | 1.2583  | -0.1726 | -0.2652 | -0.0515 | -0.2431  | -0.1587 | -0.0673 | -0.4111 | 0.0490  | -0.1479 |
| 1  | -1.1097                   | 1.3931  | -2.1514 | 0.0943  | 0.1329  | 0.0296  | 0.0866   | 0.0844  | 0.0005  | 0.2045  | -0.0110 | 0.0798  |
| 1  | -2.3313                   | 1.2993  | 0.0000  | 0.0761  | 0.1325  | 0.0231  | 0.0770   | 0.0788  | 0.0099  | 0.1840  | -0.0248 | 0.0699  |
| 1  | -1.2391                   | 2.6632  | 0.0000  | 0.0941  | 0.1328  | 0.0296  | 0.0834   | 0.0844  | 0.0010  | 0.2048  | -0.0103 | 0.0799  |
| 1  | 0.4234                    | 1.3790  | 1.3121  | 0.1010  | 0.1364  | 0.0243  | 0.0826   | 0.0813  | 0.0272  | 0.2041  | 0.0022  | 0.0668  |
| 1  | -1.1097                   | 1.3931  | 2.1514  | 0.0943  | 0.1329  | 0.0296  | 0.0866   | 0.0844  | 0.0005  | 0.2045  | -0.0110 | 0.0798  |
| 1  | -1.6411                   | -0.8649 | -1.2995 | 0.0848  | 0.1425  | 0.0320  | 0.0955   | 0.0881  | 0.0545  | 0.2003  | -0.0095 | 0.0791  |
| 1  | -0.1045                   | -0.8955 | -2.1396 | 0.1040  | 0.1369  | 0.0323  | 0.0945   | 0.0883  | 0.0458  | 0.2160  | 0.0080  | 0.0787  |
| 1  | -0.0630                   | -2.1661 | 0.0000  | 0.1109  | 0.1376  | 0.0394  | 0.0708   | 0.0986  | 0.1179  | 0.2136  | 0.0355  | 0.0877  |
| 1  | -1.6411                   | -0.8649 | 1.2995  | 0.0848  | 0.1425  | 0.0320  | 0.0955   | 0.0881  | 0.0545  | 0.2003  | -0.0095 | 0.0791  |
| 1  | -0.1045                   | -0.8955 | 2.1396  | 0.1040  | 0.1369  | 0.0323  | 0.0945   | 0.0883  | 0.0458  | 0.2160  | 0.0080  | 0.0787  |
| 1  | 0.4234                    | 1.3790  | -1.3121 | 0.1010  | 0.1364  | 0.0243  | 0.0826   | 0.0813  | 0.0272  | 0.2041  | 0.0022  | 0.0668  |
| 17 | 1.8042                    | -0.7676 | 0.0000  | -0.2090 | 0.2631  | -0.1060 | -0.1190  | -0.1146 | -0.1799 | -0.1158 | -0.3206 | -0.1567 |

Dipole mement (in D) 2.13 (DEN) 2.18 1.43 1.23 1.35 1.63 2.17 2.03 2.95 1.96

-----  
File TZVPMol453.out

Molecule PMol453 chlorocyclohexane(equato

SP Mol453 B3LYP/Def2TZVP VAC.

0 18

Dipole 0.2223 -2.4365 0.0000 2.4466

Quadrupole 1.7958 -3.7548 1.9589 1.0583 0.0000 0.0000



|                      | Atomic coordinates (in A) |         |            | Mul.    | Lowdin  | Hirsch. | I-Hirsch | CM5     | ESP     | NPA     | AIM     | ACP     |
|----------------------|---------------------------|---------|------------|---------|---------|---------|----------|---------|---------|---------|---------|---------|
| 6                    | 0.1646                    | -1.5453 | 1.2540     | -0.1834 | -0.2561 | -0.0459 | -0.1470  | -0.1561 | 0.0593  | -0.3857 | 0.0368  | -0.1441 |
| 6                    | 0.8259                    | -2.0985 | 0.0000     | -0.1595 | -0.2611 | -0.0483 | -0.1602  | -0.1587 | -0.0924 | -0.3877 | 0.0407  | -0.1460 |
| 6                    | 0.1646                    | -1.5453 | -1.2540    | -0.1834 | -0.2561 | -0.0459 | -0.1470  | -0.1561 | 0.0593  | -0.3857 | 0.0365  | -0.1441 |
| 6                    | 0.1646                    | -0.0200 | -1.2557    | -0.1735 | -0.2670 | -0.0535 | -0.2515  | -0.1609 | -0.1285 | -0.4082 | 0.0506  | -0.1503 |
| 6                    | -0.5008                   | 0.5042  | 0.0000     | 0.0240  | -0.4637 | 0.0272  | 0.1278   | -0.0367 | -0.0726 | -0.1485 | 0.1281  | 0.0488  |
| 6                    | 0.1646                    | -0.0200 | 1.2557     | -0.1735 | -0.2670 | -0.0535 | -0.2515  | -0.1609 | -0.1285 | -0.4082 | 0.0509  | -0.1503 |
| 1                    | 0.6622                    | -1.9151 | -2.1516    | 0.0994  | 0.1348  | 0.0322  | 0.0895   | 0.0870  | 0.0034  | 0.2085  | -0.0050 | 0.0826  |
| 1                    | 1.8861                    | -1.8246 | 0.0000     | 0.0821  | 0.1354  | 0.0271  | 0.0843   | 0.0829  | 0.0421  | 0.1899  | -0.0169 | 0.0744  |
| 1                    | 0.7935                    | -3.1891 | 0.0000     | 0.0962  | 0.1331  | 0.0299  | 0.0840   | 0.0846  | 0.0171  | 0.2051  | -0.0097 | 0.0801  |
| 1                    | -0.8672                   | -1.9078 | 1.3095     | 0.0857  | 0.1352  | 0.0267  | 0.0811   | 0.0825  | 0.0098  | 0.1890  | -0.0178 | 0.0739  |
| 1                    | 0.6622                    | -1.9151 | 2.1516     | 0.0994  | 0.1348  | 0.0322  | 0.0895   | 0.0870  | 0.0034  | 0.2085  | -0.0050 | 0.0826  |
| 1                    | 1.1923                    | 0.3537  | -1.2885    | 0.0901  | 0.1389  | 0.0297  | 0.0957   | 0.0867  | 0.0778  | 0.1972  | 0.0004  | 0.0730  |
| 1                    | -0.3381                   | 0.3734  | -2.1392    | 0.1051  | 0.1362  | 0.0320  | 0.0949   | 0.0879  | 0.0578  | 0.2145  | 0.0066  | 0.0779  |
| 1                    | -1.5597                   | 0.2364  | 0.0000     | 0.0984  | 0.1399  | 0.0368  | 0.0721   | 0.0969  | 0.1421  | 0.2017  | 0.0289  | 0.0818  |
| 1                    | 1.1923                    | 0.3537  | 1.2885     | 0.0901  | 0.1389  | 0.0297  | 0.0957   | 0.0867  | 0.0778  | 0.1972  | 0.0004  | 0.0730  |
| 1                    | -0.3381                   | 0.3734  | 2.1392     | 0.1051  | 0.1362  | 0.0320  | 0.0949   | 0.0879  | 0.0578  | 0.2145  | 0.0066  | 0.0779  |
| 1                    | -0.8672                   | -1.9078 | -1.3095    | 0.0857  | 0.1352  | 0.0267  | 0.0811   | 0.0825  | 0.0098  | 0.1890  | -0.0178 | 0.0739  |
| 17                   | -0.4894                   | 2.3128  | 0.0000     | -0.1879 | 0.2725  | -0.1149 | -0.1333  | -0.1230 | -0.1956 | -0.0911 | -0.3142 | -0.1650 |
| Dipole mement (in D) |                           |         | 2.45 (DEN) | 2.47    | 1.34    | 1.56    | 1.74     | 1.93    | 2.52    | 2.10    | 3.40    | 2.21    |

-----  
File TZVPMol454.out  
Molecule PMol454 chloroethene  
SP Mol454 B3LYP/Def2TZVP VAC.  
0 6

| Dipole               | 0.5419                    | 1.2538  | 0.0000     | 1.3659  |         |         |          |         |         |         |         |         |
|----------------------|---------------------------|---------|------------|---------|---------|---------|----------|---------|---------|---------|---------|---------|
| Quadrupole           | 0.9905                    | 1.4725  | -2.4630    | -0.1554 | 0.0000  | 0.0000  |          |         |         |         |         |         |
|                      | Atomic coordinates (in A) |         |            | Mul.    | Lowdin  | Hirsch. | I-Hirsch | CM5     | ESP     | NPA     | AIM     | ACP     |
| 6                    | 0.0000                    | 0.7506  | 0.0000     | -0.0333 | -0.4991 | -0.0087 | 0.0056   | -0.0658 | -0.0938 | -0.2174 | 0.0566  | 0.0110  |
| 6                    | 1.2892                    | 1.0360  | 0.0000     | -0.2637 | -0.2370 | -0.0832 | -0.3290  | -0.1847 | -0.3609 | -0.4049 | -0.0177 | -0.1865 |
| 1                    | 1.6051                    | 2.0696  | 0.0000     | 0.1240  | 0.1291  | 0.0482  | 0.1332   | 0.1014  | 0.1685  | 0.2086  | 0.0523  | 0.0976  |
| 1                    | -0.7806                   | 1.4981  | 0.0000     | 0.1379  | 0.1245  | 0.0541  | 0.1081   | 0.1106  | 0.1704  | 0.2075  | 0.0808  | 0.0994  |
| 17                   | -0.6243                   | -0.8564 | 0.0000     | -0.0955 | 0.3585  | -0.0580 | -0.0519  | -0.0628 | -0.0753 | -0.0001 | -0.2321 | -0.1130 |
| 1                    | 2.0534                    | 0.2724  | 0.0000     | 0.1306  | 0.1240  | 0.0476  | 0.1340   | 0.1014  | 0.1911  | 0.2062  | 0.0601  | 0.0915  |
| Dipole mement (in D) |                           |         | 1.37 (DEN) | 1.41    | 2.25    | 0.78    | 0.88     | 1.12    | 1.43    | 1.10    | 2.59    | 1.46    |

-----  
File TZVPMol455.out  
Molecule PMol455 1,1-dichloroethene  
SP Mol455 B3LYP/Def2TZVP VAC.  
0 6

| Dipole     | 0.0000                    | 0.0000 | 1.2295 | 1.2295 |         |         |          |        |        |         |        |        |
|------------|---------------------------|--------|--------|--------|---------|---------|----------|--------|--------|---------|--------|--------|
| Quadrupole | -2.1882                   | 0.0597 | 2.1284 | 0.0000 | 0.0000  | 0.0000  |          |        |        |         |        |        |
|            | Atomic coordinates (in A) |        |        | Mul.   | Lowdin  | Hirsch. | I-Hirsch | CM5    | ESP    | NPA     | AIM    | ACP    |
| 6          | 0.0000                    | 0.0000 | 0.4191 | 0.1035 | -0.8275 | 0.0427  | 0.2117   | 0.0342 | 0.0400 | -0.1191 | 0.1664 | 0.1871 |

|    |        |         |         |         |         |         |         |         |         |         |         |         |
|----|--------|---------|---------|---------|---------|---------|---------|---------|---------|---------|---------|---------|
| 6  | 0.0000 | 0.0000  | 1.7428  | -0.2695 | -0.2409 | -0.0900 | -0.4355 | -0.1883 | -0.3125 | -0.4149 | 0.0278  | -0.1972 |
| 1  | 0.0000 | 0.9304  | 2.2887  | 0.1405  | 0.1307  | 0.0524  | 0.1534  | 0.1068  | 0.1673  | 0.2200  | 0.0731  | 0.0966  |
| 17 | 0.0000 | 1.4442  | -0.5161 | -0.0575 | 0.4035  | -0.0288 | -0.0416 | -0.0298 | -0.0311 | 0.0470  | -0.1702 | -0.0916 |
| 17 | 0.0000 | -1.4442 | -0.5161 | -0.0575 | 0.4035  | -0.0288 | -0.0416 | -0.0298 | -0.0311 | 0.0470  | -0.1702 | -0.0916 |
| 1  | 0.0000 | -0.9304 | 2.2887  | 0.1405  | 0.1307  | 0.0524  | 0.1534  | 0.1068  | 0.1673  | 0.2200  | 0.0731  | 0.0966  |

Dipole mement (in D) 1.23 (DEN) 1.33 2.81 0.63 0.36 0.99 1.30 0.89 3.02 1.30

-----  
File TZVPMol456.out

Molecule PMol456 Z-1,2-dichloroethene

SP Mol456 B3LYP/Def2TZVP VAC.

0 6

|            |                           |         |         |         |         |         |          |         |         |         |         |         |
|------------|---------------------------|---------|---------|---------|---------|---------|----------|---------|---------|---------|---------|---------|
| Dipole     | 0.0000                    | 0.0000  | 1.7779  | 1.7779  |         |         |          |         |         |         |         |         |
| Quadrupole | -2.2541                   | -1.1899 | 3.4440  | 0.0000  | 0.0000  | 0.0000  |          |         |         |         |         |         |
|            | Atomic coordinates (in A) |         |         | Mul.    | Lowdin  | Hirsch. | I-Hirsch | CM5     | ESP     | NPA     | AIM     | ACP     |
| 6          | 0.0000                    | 0.6632  | 0.9524  | -0.0822 | -0.5282 | -0.0235 | -0.1165  | -0.0767 | -0.1367 | -0.2577 | 0.1048  | -0.0062 |
| 6          | 0.0000                    | -0.6632 | 0.9524  | -0.0822 | -0.5282 | -0.0235 | -0.1165  | -0.0767 | -0.1367 | -0.2577 | 0.1043  | -0.0062 |
| 1          | 0.0000                    | -1.2086 | 1.8845  | 0.1463  | 0.1323  | 0.0590  | 0.1257   | 0.1158  | 0.1672  | 0.2223  | 0.0922  | 0.1040  |
| 1          | 0.0000                    | 1.2086  | 1.8845  | 0.1463  | 0.1323  | 0.0590  | 0.1257   | 0.1158  | 0.1672  | 0.2223  | 0.0922  | 0.1040  |
| 17         | 0.0000                    | 1.6398  | -0.4470 | -0.0641 | 0.3958  | -0.0355 | -0.0092  | -0.0392 | -0.0305 | 0.0355  | -0.1967 | -0.0978 |
| 17         | 0.0000                    | -1.6398 | -0.4470 | -0.0641 | 0.3958  | -0.0355 | -0.0092  | -0.0392 | -0.0305 | 0.0355  | -0.1967 | -0.0978 |

Dipole mement (in D) 1.78 (DEN) 2.17 4.14 1.01 1.25 1.56 1.91 1.51 3.47 2.25

-----  
File TZVPMol457.out

Molecule PMol457 1-chloropropene(cis)

SP Mol457 B3LYP/Def2TZVP VAC.

0 9

|            |                           |         |         |         |         |         |          |         |         |         |         |         |
|------------|---------------------------|---------|---------|---------|---------|---------|----------|---------|---------|---------|---------|---------|
| Dipole     | -1.5516                   | 0.3806  | 0.0000  | 1.5976  |         |         |          |         |         |         |         |         |
| Quadrupole | 0.4138                    | 1.6769  | -2.0908 | 0.0889  | 0.0000  | 0.0000  |          |         |         |         |         |         |
|            | Atomic coordinates (in A) |         |         | Mul.    | Lowdin  | Hirsch. | I-Hirsch | CM5     | ESP     | NPA     | AIM     | ACP     |
| 6          | -1.2327                   | 0.4256  | 0.0000  | -0.1385 | -0.2361 | -0.0358 | -0.0486  | -0.0986 | 0.0209  | -0.1933 | 0.0070  | -0.0667 |
| 6          | 0.0000                    | 0.9129  | 0.0000  | -0.0665 | -0.4762 | -0.0255 | -0.0912  | -0.0808 | -0.3036 | -0.2282 | 0.0423  | -0.0138 |
| 17         | 1.4291                    | -0.0613 | 0.0000  | -0.1097 | 0.3497  | -0.0605 | -0.0398  | -0.0659 | -0.0548 | -0.0172 | -0.2483 | -0.1132 |
| 6          | -1.6372                   | -0.9995 | 0.0000  | -0.2948 | -0.2926 | -0.0822 | -0.3755  | -0.2288 | -0.0370 | -0.6378 | 0.0212  | -0.2456 |
| 1          | -2.0227                   | 1.1699  | 0.0000  | 0.1146  | 0.1478  | 0.0437  | 0.1007   | 0.0998  | 0.0687  | 0.2073  | 0.0353  | 0.0895  |
| 1          | 0.2197                    | 1.9697  | 0.0000  | 0.1360  | 0.1252  | 0.0494  | 0.1050   | 0.1061  | 0.1959  | 0.2107  | 0.0757  | 0.0941  |
| 1          | -0.7764                   | -1.6636 | 0.0000  | 0.1235  | 0.1233  | 0.0314  | 0.1090   | 0.0856  | 0.0457  | 0.2223  | 0.0318  | 0.0751  |
| 1          | -2.2480                   | -1.2340 | 0.8729  | 0.1176  | 0.1294  | 0.0397  | 0.1203   | 0.0913  | 0.0321  | 0.2181  | 0.0174  | 0.0904  |
| 1          | -2.2480                   | -1.2340 | -0.8729 | 0.1176  | 0.1294  | 0.0397  | 0.1203   | 0.0913  | 0.0321  | 0.2181  | 0.0174  | 0.0904  |

Dipole mement (in D) 1.60 (DEN) 1.64 2.35 0.93 1.07 1.27 1.58 1.37 2.74 1.63

-----  
File TZVPMol458.out

Molecule PMol458 1-chloropropene(trans)

SP Mol1458 B3LYP/Def2TZVP VAC.

0 9

|                      |                           |         |         |         |         |         |          |         |         |         |         |         |
|----------------------|---------------------------|---------|---------|---------|---------|---------|----------|---------|---------|---------|---------|---------|
| Dipole               | 1.8838                    | 0.0097  | 0.0000  | 1.8838  |         |         |          |         |         |         |         |         |
| Quadrupole           | 0.2214                    | 1.5492  | -1.7706 | -0.0607 | 0.0000  | 0.0000  |          |         |         |         |         |         |
|                      | Atomic coordinates (in A) |         |         | Mul.    | Lowdin  | Hirsch. | I-Hirsch | CM5     | ESP     | NPA     | AIM     | ACP     |
| 6                    | 0.9154                    | -0.5123 | 0.0000  | -0.1093 | -0.2283 | -0.0353 | -0.0547  | -0.0981 | 0.0627  | -0.1944 | 0.0127  | -0.0672 |
| 6                    | 0.0000                    | 0.4451  | 0.0000  | -0.0578 | -0.4788 | -0.0245 | -0.0803  | -0.0793 | -0.3008 | -0.2253 | 0.0451  | -0.0122 |
| 1                    | 0.2403                    | 1.4999  | 0.0000  | 0.1264  | 0.1238  | 0.0482  | 0.1074   | 0.1051  | 0.2181  | 0.2027  | 0.0703  | 0.0919  |
| 6                    | 2.3769                    | -0.2438 | 0.0000  | -0.3117 | -0.2860 | -0.0771 | -0.3568  | -0.2241 | -0.2414 | -0.6173 | 0.0264  | -0.2406 |
| 1                    | 0.5913                    | -1.5474 | 0.0000  | 0.1152  | 0.1402  | 0.0434  | 0.1017   | 0.1001  | 0.0955  | 0.2016  | 0.0443  | 0.0835  |
| 17                   | -1.7000                   | 0.1446  | 0.0000  | -0.1103 | 0.3502  | -0.0705 | -0.0642  | -0.0752 | -0.0793 | -0.0051 | -0.2436 | -0.1245 |
| 1                    | 2.5942                    | 0.8228  | 0.0000  | 0.1083  | 0.1247  | 0.0379  | 0.1142   | 0.0904  | 0.0797  | 0.2080  | 0.0109  | 0.0891  |
| 1                    | 2.8602                    | -0.6840 | 0.8736  | 0.1196  | 0.1271  | 0.0390  | 0.1164   | 0.0905  | 0.0827  | 0.2149  | 0.0167  | 0.0900  |
| 1                    | 2.8602                    | -0.6840 | -0.8736 | 0.1196  | 0.1271  | 0.0390  | 0.1164   | 0.0905  | 0.0827  | 0.2149  | 0.0167  | 0.0900  |
| Dipole mement (in D) | 1.88                      | (DEN)   | 1.97    | 1.59    | 1.26    | 1.24    | 1.64     | 1.96    | 1.45    | 3.15    | 1.91    |         |

-----  
File TZVPMol1459.out

Molecule PMol1459 2-chloropropene

SP Mol1459 B3LYP/Def2TZVP VAC.

0 9

|                      |                           |         |         |         |         |         |          |         |         |         |         |         |
|----------------------|---------------------------|---------|---------|---------|---------|---------|----------|---------|---------|---------|---------|---------|
| Dipole               | 0.6797                    | 1.4419  | 0.0000  | 1.5941  |         |         |          |         |         |         |         |         |
| Quadrupole           | 1.4815                    | 0.4546  | -1.9360 | 0.0733  | 0.0000  | 0.0000  |          |         |         |         |         |         |
|                      | Atomic coordinates (in A) |         |         | Mul.    | Lowdin  | Hirsch. | I-Hirsch | CM5     | ESP     | NPA     | AIM     | ACP     |
| 6                    | 0.0000                    | 0.4584  | 0.0000  | 0.1276  | -0.5045 | 0.0350  | 0.2620   | 0.0160  | 0.2259  | -0.0105 | 0.0542  | 0.1297  |
| 6                    | -1.0164                   | 1.3075  | 0.0000  | -0.3015 | -0.2199 | -0.0976 | -0.4067  | -0.1970 | -0.5088 | -0.4119 | -0.0223 | -0.2067 |
| 1                    | -0.8216                   | 2.3712  | 0.0000  | 0.1175  | 0.1281  | 0.0423  | 0.1376   | 0.0961  | 0.1989  | 0.2031  | 0.0415  | 0.0906  |
| 6                    | 1.4422                    | 0.8051  | 0.0000  | -0.3099 | -0.2870 | -0.0821 | -0.4595  | -0.2267 | -0.2830 | -0.6364 | 0.0420  | -0.2455 |
| 17                   | -0.3031                   | -1.2615 | 0.0000  | -0.1263 | 0.3682  | -0.0672 | -0.0679  | -0.0703 | -0.1335 | -0.0188 | -0.2541 | -0.1259 |
| 1                    | -2.0448                   | 0.9808  | 0.0000  | 0.1304  | 0.1243  | 0.0431  | 0.1361   | 0.0973  | 0.1934  | 0.2114  | 0.0567  | 0.0865  |
| 1                    | 1.5763                    | 1.8847  | 0.0000  | 0.1109  | 0.1300  | 0.0429  | 0.1361   | 0.0957  | 0.1076  | 0.2170  | 0.0203  | 0.0944  |
| 1                    | 1.9438                    | 0.3915  | 0.8748  | 0.1256  | 0.1304  | 0.0418  | 0.1311   | 0.0944  | 0.0997  | 0.2230  | 0.0306  | 0.0885  |
| 1                    | 1.9438                    | 0.3915  | -0.8748 | 0.1256  | 0.1304  | 0.0418  | 0.1311   | 0.0944  | 0.0997  | 0.2230  | 0.0306  | 0.0885  |
| Dipole mement (in D) | 1.59                      | (DEN)   | 1.68    | 2.13    | 0.94    | 0.77    | 1.29     | 1.70    | 1.28    | 2.83    | 1.57    |         |

-----  
File TZVPMol1460.out

Molecule PMol1460 3-chloropropene

SP Mol1460 B3LYP/Def2TZVP VAC.

0 9

|            |                           |         |         |         |         |         |          |         |         |         |         |         |
|------------|---------------------------|---------|---------|---------|---------|---------|----------|---------|---------|---------|---------|---------|
| Dipole     | 1.3675                    | 1.2403  | 0.0000  | 1.8462  |         |         |          |         |         |         |         |         |
| Quadrupole | -0.7696                   | 2.6590  | -1.8894 | 0.2488  | 0.0000  | 0.0000  |          |         |         |         |         |         |
|            | Atomic coordinates (in A) |         |         | Mul.    | Lowdin  | Hirsch. | I-Hirsch | CM5     | ESP     | NPA     | AIM     | ACP     |
| 6          | 1.3432                    | 0.3293  | 0.0000  | -0.1431 | -0.2412 | -0.0386 | -0.0549  | -0.1018 | 0.0543  | -0.2091 | -0.0377 | -0.0681 |
| 6          | 1.6193                    | -0.9641 | 0.0000  | -0.2425 | -0.2093 | -0.0853 | -0.2844  | -0.1875 | -0.4659 | -0.3756 | -0.0528 | -0.1908 |
| 1          | 0.8346                    | -1.7092 | 0.0000  | 0.1256  | 0.1197  | 0.0312  | 0.1061   | 0.0863  | 0.2042  | 0.2037  | 0.0564  | 0.0713  |

|    |         |         |         |         |         |         |         |         |         |         |         |         |
|----|---------|---------|---------|---------|---------|---------|---------|---------|---------|---------|---------|---------|
| 6  | 0.0000  | 0.9630  | 0.0000  | -0.0730 | -0.4763 | -0.0030 | -0.1203 | -0.1030 | -0.1857 | -0.3938 | 0.1325  | -0.0498 |
| 1  | 2.1530  | 1.0548  | 0.0000  | 0.1114  | 0.1449  | 0.0431  | 0.0994  | 0.0988  | 0.0849  | 0.2025  | 0.0301  | 0.0888  |
| 1  | 2.6404  | -1.3179 | 0.0000  | 0.1166  | 0.1226  | 0.0402  | 0.1167  | 0.0932  | 0.1735  | 0.1987  | 0.0361  | 0.0894  |
| 17 | -1.3614 | -0.1879 | 0.0000  | -0.1565 | 0.2780  | -0.0842 | -0.0714 | -0.0939 | -0.1424 | -0.0634 | -0.2770 | -0.1329 |
| 1  | -0.1301 | 1.5989  | 0.8756  | 0.1307  | 0.1309  | 0.0484  | 0.1044  | 0.1040  | 0.1386  | 0.2185  | 0.0561  | 0.0961  |
| 1  | -0.1301 | 1.5989  | -0.8756 | 0.1307  | 0.1309  | 0.0484  | 0.1044  | 0.1040  | 0.1386  | 0.2185  | 0.0561  | 0.0961  |

Dipole moment (in D) 1.85 (DEN) 1.91 1.85 1.07 1.42 1.45 1.89 1.70 2.49 1.85

-----  
File TZVPMol461.out

Molecule PMol461 chlorobenzene

SP Mol461 B3LYP/Def2TZVP VAC.

0 12

Dipole 0.0000 0.0000 -1.6672 1.6672  
 Quadrupole -4.4758 3.9777 0.4982 0.0000 0.0000 0.0000

|    | Atomic coordinates (in A) |         |         | Mul.    | Lowdin  | Hirsch. | I-Hirsch | CM5     | ESP     | NPA     | AIM     | ACP     |
|----|---------------------------|---------|---------|---------|---------|---------|----------|---------|---------|---------|---------|---------|
| 6  | 0.0000                    | 0.0000  | 0.5068  | 0.1683  | -0.4263 | 0.0242  | 0.1621   | 0.0166  | 0.0037  | -0.0434 | 0.0704  | 0.1033  |
| 6  | 0.0000                    | 1.2090  | -0.1740 | -0.1630 | -0.1427 | -0.0432 | -0.1891  | -0.0960 | -0.0201 | -0.2249 | 0.0051  | -0.0900 |
| 6  | 0.0000                    | -1.2090 | -0.1740 | -0.1630 | -0.1427 | -0.0432 | -0.1891  | -0.0960 | -0.0201 | -0.2249 | 0.0051  | -0.0900 |
| 6  | 0.0000                    | 1.2005  | -1.5615 | -0.1007 | -0.1327 | -0.0326 | -0.0637  | -0.0884 | -0.1822 | -0.1914 | -0.0185 | -0.0772 |
| 6  | 0.0000                    | -1.2005 | -1.5615 | -0.1007 | -0.1327 | -0.0326 | -0.0637  | -0.0884 | -0.1822 | -0.1914 | -0.0185 | -0.0772 |
| 6  | 0.0000                    | 0.0000  | -2.2583 | -0.1094 | -0.1407 | -0.0397 | -0.1046  | -0.0958 | -0.0687 | -0.2137 | -0.0217 | -0.0848 |
| 1  | 0.0000                    | 2.1377  | 0.3793  | 0.1204  | 0.1465  | 0.0460  | 0.1122   | 0.1034  | 0.0980  | 0.2226  | 0.0541  | 0.0844  |
| 1  | 0.0000                    | -2.1377 | 0.3793  | 0.1204  | 0.1465  | 0.0460  | 0.1122   | 0.1034  | 0.0980  | 0.2226  | 0.0541  | 0.0844  |
| 1  | 0.0000                    | 2.1409  | -2.0974 | 0.1151  | 0.1452  | 0.0453  | 0.1005   | 0.1015  | 0.1339  | 0.2123  | 0.0375  | 0.0899  |
| 1  | 0.0000                    | -2.1409 | -2.0974 | 0.1151  | 0.1452  | 0.0453  | 0.1005   | 0.1015  | 0.1339  | 0.2123  | 0.0375  | 0.0899  |
| 1  | 0.0000                    | 0.0000  | -3.3402 | 0.1144  | 0.1437  | 0.0433  | 0.0979   | 0.0995  | 0.1121  | 0.2117  | 0.0350  | 0.0878  |
| 17 | 0.0000                    | 0.0000  | 2.2418  | -0.1170 | 0.3908  | -0.0589 | -0.0753  | -0.0611 | -0.1063 | 0.0082  | -0.2401 | -0.1204 |

Dipole moment (in D) 1.67 (DEN) 1.60 2.23 1.02 1.20 1.36 1.76 1.31 3.03 1.73

-----  
File TZVPMol462.out

Molecule PMol462 1,2-dichlorobenzene

SP Mol462 B3LYP/Def2TZVP VAC.

0 12

Dipole 0.0000 0.0000 2.3630 2.3630  
 Quadrupole -4.3989 1.6045 2.7944 0.0000 0.0000 0.0000

|    | Atomic coordinates (in A) |         |         | Mul.    | Lowdin  | Hirsch. | I-Hirsch | CM5     | ESP     | NPA     | AIM     | ACP     |
|----|---------------------------|---------|---------|---------|---------|---------|----------|---------|---------|---------|---------|---------|
| 6  | 0.0000                    | 0.6974  | -0.0298 | 0.1053  | -0.4437 | 0.0171  | 0.0829   | 0.0128  | 0.0452  | -0.0741 | 0.1057  | 0.0943  |
| 6  | 0.0000                    | -0.6974 | -0.0298 | 0.1053  | -0.4437 | 0.0171  | 0.0829   | 0.0128  | 0.0452  | -0.0741 | 0.1057  | 0.0943  |
| 6  | 0.0000                    | 1.3868  | 1.1769  | -0.1591 | -0.1381 | -0.0388 | -0.1676  | -0.0914 | -0.0539 | -0.2073 | 0.0117  | -0.0857 |
| 6  | 0.0000                    | -1.3868 | 1.1769  | -0.1591 | -0.1381 | -0.0388 | -0.1676  | -0.0914 | -0.0539 | -0.2073 | 0.0115  | -0.0857 |
| 6  | 0.0000                    | 0.6940  | 2.3761  | -0.1045 | -0.1346 | -0.0341 | -0.0820  | -0.0900 | -0.1501 | -0.2001 | -0.0133 | -0.0794 |
| 6  | 0.0000                    | -0.6940 | 2.3761  | -0.1045 | -0.1346 | -0.0341 | -0.0820  | -0.0900 | -0.1501 | -0.2001 | -0.0134 | -0.0794 |
| 17 | 0.0000                    | -1.5854 | -1.5062 | -0.0833 | 0.4208  | -0.0404 | -0.0529  | -0.0414 | -0.0780 | 0.0401  | -0.2060 | -0.1088 |
| 1  | 0.0000                    | 2.4676  | 1.1580  | 0.1235  | 0.1490  | 0.0486  | 0.1140   | 0.1062  | 0.1008  | 0.2257  | 0.0596  | 0.0871  |

|                      |        |            |         |         |        |         |         |         |         |        |         |         |
|----------------------|--------|------------|---------|---------|--------|---------|---------|---------|---------|--------|---------|---------|
| 1                    | 0.0000 | -2.4676    | 1.1580  | 0.1235  | 0.1490 | 0.0486  | 0.1140  | 0.1062  | 0.1008  | 0.2257 | 0.0596  | 0.0871  |
| 1                    | 0.0000 | 1.2421     | 3.3087  | 0.1181  | 0.1466 | 0.0476  | 0.1055  | 0.1038  | 0.1361  | 0.2157 | 0.0424  | 0.0924  |
| 1                    | 0.0000 | -1.2421    | 3.3087  | 0.1181  | 0.1466 | 0.0476  | 0.1055  | 0.1038  | 0.1361  | 0.2157 | 0.0424  | 0.0924  |
| 17                   | 0.0000 | 1.5854     | -1.5062 | -0.0833 | 0.4208 | -0.0404 | -0.0529 | -0.0414 | -0.0780 | 0.0401 | -0.2060 | -0.1088 |
| Dipole mement (in D) |        | 2.36 (DEN) | 2.12    | 4.28    | 1.42   | 1.60    | 1.99    | 2.53    | 1.90    | 4.79   | 2.67    |         |

-----

File TZVPMol463.out

Molecule PMol463 1,3-dichlorobenzene

SP Mol463 B3LYP/Def2TZVP VAC.

0 12

|                           |         |            |         |         |         |          |         |         |         |         |         |         |
|---------------------------|---------|------------|---------|---------|---------|----------|---------|---------|---------|---------|---------|---------|
| Dipole                    | 0.0000  | 0.0000     | 1.5628  | 1.5628  |         |          |         |         |         |         |         |         |
| Quadrupole                | -2.9086 | -2.5037    | 5.4123  | 0.0000  | 0.0000  | 0.0000   | 0.0000  |         |         |         |         |         |
| Atomic coordinates (in A) |         | Mul.       |         | Lowdin  | Hirsch. | I-Hirsch | CM5     | ESP     | NPA     | AIM     | ACP     |         |
| 6                         | 0.0000  | 1.1911     | -0.0049 | 0.1690  | -0.4250 | 0.0289   | 0.1858  | 0.0214  | -0.0313 | -0.0313 | 0.0812  | 0.1081  |
| 6                         | 0.0000  | 0.0000     | -0.7161 | -0.2160 | -0.1453 | -0.0482  | -0.2970 | -0.0976 | 0.0497  | -0.2445 | 0.0371  | -0.0974 |
| 6                         | 0.0000  | 1.2074     | 1.3824  | -0.1625 | -0.1428 | -0.0439  | -0.2013 | -0.0968 | -0.0378 | -0.2317 | 0.0100  | -0.0916 |
| 6                         | 0.0000  | -1.1911    | -0.0049 | 0.1690  | -0.4250 | 0.0289   | 0.1858  | 0.0214  | -0.0313 | -0.0313 | 0.0809  | 0.1081  |
| 6                         | 0.0000  | 0.0000     | 2.0648  | -0.0934 | -0.1252 | -0.0261  | -0.0343 | -0.0817 | -0.1962 | -0.1764 | -0.0099 | -0.0712 |
| 6                         | 0.0000  | -1.2074    | 1.3824  | -0.1625 | -0.1428 | -0.0439  | -0.2013 | -0.0968 | -0.0378 | -0.2317 | 0.0100  | -0.0916 |
| 1                         | 0.0000  | 0.0000     | -1.7958 | 0.1323  | 0.1509  | 0.0506   | 0.1324  | 0.1092  | 0.0846  | 0.2343  | 0.0775  | 0.0835  |
| 1                         | 0.0000  | 2.1498     | 1.9109  | 0.1248  | 0.1481  | 0.0485   | 0.1170  | 0.1059  | 0.1117  | 0.2264  | 0.0595  | 0.0873  |
| 17                        | 0.0000  | -2.6873    | -0.8763 | -0.1032 | 0.4052  | -0.0467  | -0.0561 | -0.0488 | -0.0855 | 0.0214  | -0.2260 | -0.1088 |
| 1                         | 0.0000  | 0.0000     | 3.1468  | 0.1208  | 0.1486  | 0.0501   | 0.1082  | 0.1064  | 0.1476  | 0.2174  | 0.0462  | 0.0951  |
| 1                         | 0.0000  | -2.1498    | 1.9109  | 0.1248  | 0.1481  | 0.0485   | 0.1170  | 0.1059  | 0.1117  | 0.2264  | 0.0595  | 0.0873  |
| 17                        | 0.0000  | 2.6873     | -0.8763 | -0.1032 | 0.4052  | -0.0467  | -0.0561 | -0.0488 | -0.0855 | 0.0214  | -0.2260 | -0.1088 |
| Dipole mement (in D)      |         | 1.56 (DEN) | 1.50    | 2.36    | 0.93    | 1.11     | 1.26    | 1.65    | 1.26    | 2.93    | 1.64    |         |

-----

File TZVPMol464.out

Molecule PMol464 ortho-chlorotoluene

SP Mol464 B3LYP/Def2TZVP VAC.

0 15

|                           |         |         |         |         |         |          |         |         |         |         |         |         |
|---------------------------|---------|---------|---------|---------|---------|----------|---------|---------|---------|---------|---------|---------|
| Dipole                    | -1.2654 | 0.6325  | 0.0000  | 1.4147  |         |          |         |         |         |         |         |         |
| Quadrupole                | 0.5814  | 3.6440  | -4.2254 | 1.4102  | 0.0002  | 0.0001   |         |         |         |         |         |         |
| Atomic coordinates (in A) |         | Mul.    |         | Lowdin  | Hirsch. | I-Hirsch | CM5     | ESP     | NPA     | AIM     | ACP     |         |
| 6                         | -0.0867 | 0.9374  | -0.0000 | 0.0897  | -0.1742 | 0.0034   | 0.1039  | -0.0112 | 0.3965  | -0.0399 | 0.0214  | 0.0343  |
| 6                         | 0.3577  | -0.3865 | 0.0000  | 0.0986  | -0.3921 | 0.0202   | 0.1065  | 0.0146  | -0.0846 | -0.0377 | 0.0602  | 0.0929  |
| 6                         | -1.4662 | 1.1371  | -0.0001 | -0.1588 | -0.1120 | -0.0396  | -0.1291 | -0.0934 | -0.3185 | -0.1905 | -0.0244 | -0.0901 |
| 6                         | -0.5185 | -1.4611 | -0.0000 | -0.1659 | -0.1445 | -0.0451  | -0.1827 | -0.0978 | -0.0355 | -0.2164 | 0.0050  | -0.0914 |
| 6                         | -2.3601 | 0.0769  | -0.0001 | -0.1061 | -0.1406 | -0.0416  | -0.0985 | -0.0975 | -0.0590 | -0.2060 | -0.0230 | -0.0861 |
| 6                         | -1.8848 | -1.2259 | -0.0001 | -0.1084 | -0.1397 | -0.0393  | -0.0821 | -0.0951 | -0.2063 | -0.2028 | -0.0199 | -0.0837 |
| 17                        | 2.0668  | -0.7071 | 0.0001  | -0.1162 | 0.3993  | -0.0499  | -0.0501 | -0.0527 | -0.1027 | -0.0002 | -0.2475 | -0.1097 |
| 6                         | 0.8659  | 2.0847  | 0.0000  | -0.3407 | -0.2609 | -0.0861  | -0.4326 | -0.2305 | -0.5181 | -0.6134 | 0.0216  | -0.2534 |
| 1                         | -1.8374 | 2.1553  | -0.0001 | 0.1057  | 0.1460  | 0.0402   | 0.1008  | 0.0972  | 0.1471  | 0.2067  | 0.0281  | 0.0836  |
| 1                         | -0.1255 | -2.4683 | -0.0000 | 0.1170  | 0.1463  | 0.0446   | 0.1096  | 0.1021  | 0.1071  | 0.2218  | 0.0521  | 0.0827  |

|   |         |         |         |        |        |        |        |        |        |        |        |        |
|---|---------|---------|---------|--------|--------|--------|--------|--------|--------|--------|--------|--------|
| 1 | -3.4250 | 0.2691  | -0.0001 | 0.1104 | 0.1435 | 0.0424 | 0.0982 | 0.0985 | 0.1174 | 0.2107 | 0.0330 | 0.0866 |
| 1 | -2.5714 | -2.0623 | -0.0001 | 0.1118 | 0.1441 | 0.0437 | 0.1003 | 0.0998 | 0.1379 | 0.2119 | 0.0354 | 0.0880 |
| 1 | 1.5210  | 2.0589  | 0.8716  | 0.1267 | 0.1299 | 0.0354 | 0.1182 | 0.0884 | 0.1393 | 0.2228 | 0.0255 | 0.0794 |
| 1 | 0.3367  | 3.0346  | -0.0000 | 0.1096 | 0.1251 | 0.0362 | 0.1192 | 0.0891 | 0.1402 | 0.2101 | 0.0074 | 0.0878 |
| 1 | 1.5211  | 2.0589  | -0.8714 | 0.1267 | 0.1299 | 0.0354 | 0.1182 | 0.0884 | 0.1393 | 0.2228 | 0.0255 | 0.0794 |

Dipole mement (in D) 1.41 (DEN) 1.30 2.87 0.73 0.83 1.04 1.50 1.11 2.72 1.46

-----  
File TZVPMol465.out

Molecule PMol465 para-chlorotoluene

SP Mol465 B3LYP/Def2TZVP VAC.

0 15

Dipole 2.1344 0.0000 0.0277 2.1346  
 Quadropole -0.0652 3.9020 -3.8368 -0.0001 0.0846 0.0000

|    | Atomic coordinates (in A) |         |         | Mul.    | Lowdin  | Hirsch. | I-Hirsch | CM5     | ESP     | NPA     | AIM     | ACP     |
|----|---------------------------|---------|---------|---------|---------|---------|----------|---------|---------|---------|---------|---------|
| 6  | 1.7973                    | 0.0000  | -0.0104 | 0.1601  | -0.1690 | 0.0070  | 0.1538   | -0.0107 | 0.3798  | -0.0268 | 0.0000  | 0.0386  |
| 6  | 1.0780                    | 1.1936  | -0.0100 | -0.1681 | -0.1095 | -0.0385 | -0.1217  | -0.0921 | -0.3321 | -0.1908 | -0.0254 | -0.0890 |
| 6  | 1.0780                    | -1.1936 | -0.0100 | -0.1681 | -0.1095 | -0.0385 | -0.1217  | -0.0921 | -0.3321 | -0.1908 | -0.0253 | -0.0890 |
| 6  | -0.3084                   | 1.2049  | -0.0033 | -0.1553 | -0.1421 | -0.0444 | -0.1783  | -0.0971 | -0.0045 | -0.2164 | 0.0045  | -0.0909 |
| 6  | -0.3084                   | -1.2049 | -0.0033 | -0.1553 | -0.1421 | -0.0444 | -0.1783  | -0.0971 | -0.0045 | -0.2164 | 0.0045  | -0.0909 |
| 6  | -0.9946                   | 0.0000  | 0.0013  | 0.1626  | -0.4312 | 0.0189  | 0.1503   | 0.0113  | -0.0223 | -0.0528 | 0.0696  | 0.0978  |
| 1  | 1.6118                    | 2.1370  | -0.0176 | 0.1068  | 0.1466  | 0.0414  | 0.1039   | 0.0983  | 0.1567  | 0.2072  | 0.0291  | 0.0849  |
| 1  | 1.6118                    | -2.1370 | -0.0176 | 0.1068  | 0.1466  | 0.0414  | 0.1039   | 0.0983  | 0.1567  | 0.2072  | 0.0291  | 0.0849  |
| 1  | -0.8562                   | 2.1370  | -0.0055 | 0.1167  | 0.1464  | 0.0452  | 0.1115   | 0.1026  | 0.1041  | 0.2217  | 0.0522  | 0.0834  |
| 1  | -0.8562                   | -2.1370 | -0.0055 | 0.1167  | 0.1464  | 0.0452  | 0.1115   | 0.1026  | 0.1041  | 0.2217  | 0.0522  | 0.0834  |
| 17 | -2.7297                   | -0.0000 | 0.0060  | -0.1227 | 0.3867  | -0.0633 | -0.0795  | -0.0654 | -0.1123 | 0.0052  | -0.2442 | -0.1246 |
| 6  | 3.2930                    | -0.0000 | 0.0128  | -0.3607 | -0.2521 | -0.0807 | -0.4054  | -0.2259 | -0.4656 | -0.6097 | 0.0174  | -0.2492 |
| 1  | 3.6732                    | -0.0002 | 1.0363  | 0.1247  | 0.1297  | 0.0374  | 0.1181   | 0.0893  | 0.1278  | 0.2162  | 0.0156  | 0.0857  |
| 1  | 3.7047                    | -0.8806 | -0.4773 | 0.1179  | 0.1265  | 0.0366  | 0.1159   | 0.0891  | 0.1222  | 0.2121  | 0.0102  | 0.0874  |
| 1  | 3.7047                    | 0.8807  | -0.4771 | 0.1179  | 0.1265  | 0.0366  | 0.1159   | 0.0891  | 0.1222  | 0.2121  | 0.0102  | 0.0874  |

Dipole mement (in D) 2.13 (DEN) 2.32 1.31 1.49 1.41 1.90 2.24 1.72 3.53 2.16

-----  
File TZVPMol466.out

Molecule PMol466 chloroacetylene

SP Mol466 B3LYP/Def2TZVP VAC.

0 4

Dipole 0.0000 0.0000 -0.2656 0.2656  
 Quadropole -2.2692 -2.2692 4.5385 0.0000 0.0000 0.0000

|    | Atomic coordinates (in A) |        |         | Mul.    | Lowdin  | Hirsch. | I-Hirsch | CM5     | ESP     | NPA     | AIM     | ACP     |
|----|---------------------------|--------|---------|---------|---------|---------|----------|---------|---------|---------|---------|---------|
| 1  | 0.0000                    | 0.0000 | -2.8642 | 0.1913  | 0.1261  | 0.0912  | 0.2147   | 0.1452  | 0.2806  | 0.2374  | 0.1752  | 0.1380  |
| 6  | 0.0000                    | 0.0000 | -1.8033 | -0.1422 | -0.1362 | -0.1056 | -0.3141  | -0.1569 | -0.3552 | -0.2424 | -0.0268 | -0.1615 |
| 6  | 0.0000                    | 0.0000 | -0.6030 | -0.0692 | -0.5247 | -0.0465 | 0.0118   | -0.0494 | -0.0105 | -0.1470 | -0.0802 | 0.0264  |
| 17 | 0.0000                    | 0.0000 | 1.0178  | 0.0201  | 0.5348  | 0.0608  | 0.0876   | 0.0610  | 0.0851  | 0.1520  | -0.0681 | -0.0029 |

Dipole mement (in D) 0.27 (DEN) 1.10 3.58 0.09 0.16 0.20 0.34 0.00 2.28 0.59

-----  
 File TZVPMol467.out  
 Molecule PMol467 3-chloropropyne  
 SP Mol467 B3LYP/Def2TZVP VAC.  
 0 7

|                      |                           |         |         |         |         |         |          |         |         |         |         |         |
|----------------------|---------------------------|---------|---------|---------|---------|---------|----------|---------|---------|---------|---------|---------|
| Dipole               | 1.2391                    | 1.1527  | 0.0000  | 1.6924  |         |         |          |         |         |         |         |         |
| Quadrupole           | 0.8693                    | 0.8368  | -1.7061 | -2.4356 | 0.0000  | 0.0000  |          |         |         |         |         |         |
|                      | Atomic coordinates (in A) |         |         | Mul.    | Lowdin  | Hirsch. | I-Hirsch | CM5     | ESP     | NPA     | AIM     | ACP     |
| 6                    | 2.2904                    | -0.4806 | 0.0000  | -0.0686 | -0.0756 | -0.0920 | -0.2869  | -0.1437 | -0.5199 | -0.1924 | -0.1240 | -0.1497 |
| 6                    | 1.2440                    | 0.1058  | 0.0000  | -0.1076 | -0.1509 | -0.0473 | 0.0381   | -0.0579 | 0.2340  | -0.0389 | -0.1679 | -0.0283 |
| 1                    | 3.2158                    | -1.0012 | 0.0000  | 0.1941  | 0.1280  | 0.0911  | 0.2092   | 0.1450  | 0.3284  | 0.2339  | 0.1702  | 0.1383  |
| 6                    | 0.0000                    | 0.8247  | 0.0000  | -0.1865 | -0.4604 | 0.0137  | -0.1299  | -0.0826 | -0.3204 | -0.4330 | 0.2033  | -0.0319 |
| 17                   | -1.4255                   | -0.2712 | 0.0000  | -0.1340 | 0.2740  | -0.0873 | -0.0807  | -0.0949 | -0.1032 | -0.0431 | -0.2476 | -0.1423 |
| 1                    | -0.0940                   | 1.4558  | 0.8812  | 0.1513  | 0.1425  | 0.0609  | 0.1251   | 0.1170  | 0.1906  | 0.2367  | 0.0830  | 0.1069  |
| 1                    | -0.0940                   | 1.4558  | -0.8812 | 0.1513  | 0.1425  | 0.0609  | 0.1251   | 0.1170  | 0.1906  | 0.2367  | 0.0830  | 0.1069  |
| Dipole mement (in D) | 1.69 (DEN)                |         | 2.49    | 1.90    | 1.01    | 1.26    | 1.35     | 1.81    | 1.65    | 2.52    | 1.71    |         |

-----  
 File TZVPMol468.out  
 Molecule PMol468 chlorofluoromethane  
 SP Mol468 B3LYP/Def2TZVP VAC.  
 0 5

|                      |                           |         |         |         |         |         |          |         |         |         |         |         |
|----------------------|---------------------------|---------|---------|---------|---------|---------|----------|---------|---------|---------|---------|---------|
| Dipole               | 0.3676                    | 1.7525  | 0.0000  | 1.7906  |         |         |          |         |         |         |         |         |
| Quadrupole           | -1.7285                   | 1.0192  | 0.7093  | 1.9398  | 0.0000  | 0.0000  |          |         |         |         |         |         |
|                      | Atomic coordinates (in A) |         |         | Mul.    | Lowdin  | Hirsch. | I-Hirsch | CM5     | ESP     | NPA     | AIM     | ACP     |
| 6                    | 0.5638                    | 0.5677  | 0.0000  | 0.0828  | -0.6045 | 0.0951  | 0.1671   | 0.0170  | -0.0040 | 0.0407  | 0.7262  | 0.1091  |
| 1                    | 0.6740                    | 1.1680  | -0.9007 | 0.1222  | 0.1029  | 0.0534  | 0.0727   | 0.1101  | 0.1332  | 0.1703  | 0.0786  | 0.1011  |
| 1                    | 0.6739                    | 1.1680  | 0.9008  | 0.1222  | 0.1029  | 0.0534  | 0.0727   | 0.1101  | 0.1332  | 0.1703  | 0.0786  | 0.1011  |
| 17                   | -1.0687                   | -0.1166 | -0.0000 | -0.1230 | 0.2839  | -0.0809 | -0.1218  | -0.0870 | -0.1182 | -0.0587 | -0.2376 | -0.1351 |
| 9                    | 1.4930                    | -0.4178 | 0.0000  | -0.2041 | 0.1148  | -0.1210 | -0.1906  | -0.1502 | -0.1442 | -0.3226 | -0.6460 | -0.1762 |
| Dipole mement (in D) | 1.79 (DEN)                |         | 2.08    | 1.83    | 1.16    | 1.73    | 1.64     | 1.89    | 2.82    | 4.39    | 1.90    |         |

-----  
 File TZVPMol469.out  
 Molecule PMol469 chlorodifluoromethane  
 SP Mol469 B3LYP/Def2TZVP VAC.  
 0 5

|            |                           |         |         |         |         |         |          |         |         |         |         |         |
|------------|---------------------------|---------|---------|---------|---------|---------|----------|---------|---------|---------|---------|---------|
| Dipole     | -1.0779                   | 0.9253  | 0.0000  | 1.4206  |         |         |          |         |         |         |         |         |
| Quadrupole | 2.2368                    | -0.6399 | -1.5968 | -0.9595 | 0.0000  | 0.0000  |          |         |         |         |         |         |
|            | Atomic coordinates (in A) |         |         | Mul.    | Lowdin  | Hirsch. | I-Hirsch | CM5     | ESP     | NPA     | AIM     | ACP     |
| 6          | -0.5646                   | -0.0916 | 0.0000  | 0.3230  | -0.7811 | 0.2056  | 0.5847   | 0.1957  | 0.0980  | 0.5179  | 1.3663  | 0.3610  |
| 1          | -1.4481                   | 0.5479  | 0.0000  | 0.1004  | 0.1066  | 0.0608  | 0.0300   | 0.1219  | 0.1702  | 0.1452  | 0.1119  | 0.1008  |
| 17         | 0.8823                    | 0.9268  | 0.0000  | -0.0898 | 0.3296  | -0.0629 | -0.1535  | -0.0630 | -0.0687 | -0.0501 | -0.1941 | -0.1281 |
| 9          | -0.5646                   | -0.8752 | 1.0808  | -0.1668 | 0.1725  | -0.1018 | -0.2306  | -0.1273 | -0.0998 | -0.3065 | -0.6419 | -0.1668 |
| 9          | -0.5646                   | -0.8752 | -1.0808 | -0.1668 | 0.1725  | -0.1018 | -0.2306  | -0.1273 | -0.0998 | -0.3065 | -0.6419 | -0.1668 |

Dipole mement (in D) 1.42 (DEN) 1.54 1.95 0.95 1.61 1.40 1.52 2.69 4.60 1.62

-----  
File TZVPMol470.out

Molecule PMol470 fluorotrichloromethane

SP Mol470 B3LYP/Def2TZVP VAC.

0 5

Dipole -0.0011 0.0000 -0.3672 0.3672

Quadrupole 0.6849 0.6831 -1.3681 0.0007 -0.0003 0.0000

Atomic coordinates (in A)

Mul.

Lowdin

Hirsch.

I-Hirsch

CM5

ESP

NPA

AIM

ACP

|    |         |         |         |         |         |         |         |         |         |         |         |         |
|----|---------|---------|---------|---------|---------|---------|---------|---------|---------|---------|---------|---------|
| 6  | 0.0001  | -0.0001 | 0.2509  | 0.2366  | -1.2769 | 0.1876  | 0.5663  | 0.2062  | -0.3324 | 0.1956  | 1.0030  | 0.4582  |
| 17 | 1.5303  | -0.6839 | -0.3092 | -0.0376 | 0.3618  | -0.0347 | -0.1181 | -0.0326 | 0.0888  | 0.0326  | -0.1253 | -0.1026 |
| 17 | -1.3579 | -0.9832 | -0.3082 | -0.0375 | 0.3617  | -0.0346 | -0.1181 | -0.0325 | 0.0895  | 0.0327  | -0.1253 | -0.1025 |
| 17 | -0.1731 | 1.6670  | -0.3087 | -0.0375 | 0.3619  | -0.0346 | -0.1181 | -0.0325 | 0.0889  | 0.0327  | -0.1253 | -0.1025 |
| 9  | 0.0014  | 0.0001  | 1.5820  | -0.1240 | 0.1915  | -0.0838 | -0.2120 | -0.1085 | 0.0652  | -0.2937 | -0.6264 | -0.1507 |

Dipole mement (in D) 0.37 (DEN) 0.49 1.69 0.26 0.40 0.43 0.30 2.14 2.99 0.14

-----  
File TZVPMol471.out

Molecule PMol471 chloropentafluoroethane

SP Mol471 B3LYP/Def2TZVP VAC.

0 8

Dipole -0.4087 -0.2842 0.0000 0.4978

Quadrupole 0.8689 -0.1118 -0.7571 0.8386 0.0000 0.0000

Atomic coordinates (in A)

Mul.

Lowdin

Hirsch.

I-Hirsch

CM5

ESP

NPA

AIM

ACP

|    |         |         |         |         |         |         |         |         |         |         |         |         |
|----|---------|---------|---------|---------|---------|---------|---------|---------|---------|---------|---------|---------|
| 6  | -0.4497 | 0.4641  | 0.0000  | 0.3421  | -0.8231 | 0.2053  | 0.4907  | 0.2479  | -0.0054 | 0.5509  | 1.4010  | 0.4349  |
| 6  | 0.9386  | -0.2272 | 0.0000  | 0.4594  | -0.7338 | 0.2627  | 0.7894  | 0.3240  | 0.4612  | 0.8921  | 1.9042  | 0.5110  |
| 17 | -1.7432 | -0.7281 | 0.0000  | -0.0545 | 0.4171  | -0.0274 | -0.1029 | -0.0225 | 0.0252  | 0.0057  | -0.1399 | -0.1117 |
| 9  | 1.8855  | 0.7051  | -0.0001 | -0.1527 | 0.2306  | -0.0899 | -0.2509 | -0.1108 | -0.1133 | -0.2923 | -0.6307 | -0.1704 |
| 9  | -0.5375 | 1.2373  | -1.0808 | -0.1445 | 0.2219  | -0.0860 | -0.2074 | -0.1085 | -0.0443 | -0.2866 | -0.6287 | -0.1631 |
| 9  | -0.5375 | 1.2373  | 1.0808  | -0.1445 | 0.2219  | -0.0860 | -0.2074 | -0.1085 | -0.0443 | -0.2866 | -0.6287 | -0.1631 |
| 9  | 1.0782  | -0.9812 | -1.0811 | -0.1527 | 0.2326  | -0.0894 | -0.2557 | -0.1108 | -0.1396 | -0.2916 | -0.6381 | -0.1687 |
| 9  | 1.0783  | -0.9810 | 1.0813  | -0.1526 | 0.2327  | -0.0894 | -0.2557 | -0.1108 | -0.1396 | -0.2916 | -0.6381 | -0.1687 |

Dipole mement (in D) 0.50 (DEN) 0.55 2.10 0.39 0.58 0.59 0.41 1.99 3.12 0.19

-----  
File TZVPMol472.out

Molecule PMol472 1-chloro-1-fluoroethane

SP Mol472 B3LYP/Def2TZVP VAC.

0 8

Dipole -1.3755 -1.4498 0.9174 2.1990

Quadrupole -0.0690 -1.1638 1.2328 1.6884 -0.6797 0.5627

Atomic coordinates (in A)

Mul.

Lowdin

Hirsch.

I-Hirsch

CM5

ESP

NPA

AIM

ACP

|   |         |         |         |         |         |         |         |         |         |         |        |         |
|---|---------|---------|---------|---------|---------|---------|---------|---------|---------|---------|--------|---------|
| 6 | -1.2492 | -1.0325 | -0.1099 | -0.2977 | -0.3096 | -0.0883 | -0.5247 | -0.2343 | -0.3049 | -0.6423 | 0.0338 | -0.2533 |
| 1 | -0.9222 | -1.9691 | 0.3328  | 0.1185  | 0.1297  | 0.0453  | 0.1408  | 0.0982  | 0.0961  | 0.2233  | 0.0327 | 0.0955  |



|    |         |         |         |         |         |         |         |         |         |         |         |         |
|----|---------|---------|---------|---------|---------|---------|---------|---------|---------|---------|---------|---------|
| 1  | -2.2888 | -0.8592 | 0.1627  | 0.1179  | 0.1290  | 0.0450  | 0.1406  | 0.0978  | 0.1207  | 0.2197  | 0.0276  | 0.0946  |
| 1  | -1.1785 | -1.1140 | -1.1916 | 0.1233  | 0.1285  | 0.0446  | 0.1430  | 0.0983  | 0.1285  | 0.2239  | 0.0398  | 0.0897  |
| 6  | -0.4095 | 0.1030  | 0.3840  | 0.1838  | -0.6204 | 0.1218  | 0.3860  | 0.0806  | 0.1923  | 0.2102  | 0.7022  | 0.2137  |
| 1  | -0.4220 | 0.2177  | 1.4682  | 0.1019  | 0.1215  | 0.0482  | 0.0527  | 0.1081  | 0.1096  | 0.1730  | 0.0712  | 0.0924  |
| 9  | -0.8384 | 1.2759  | -0.1646 | -0.2059 | 0.1287  | -0.1243 | -0.2060 | -0.1523 | -0.1896 | -0.3330 | -0.6486 | -0.1830 |
| 17 | 1.3123  | -0.1283 | -0.0550 | -0.1418 | 0.2926  | -0.0922 | -0.1324 | -0.0965 | -0.1528 | -0.0749 | -0.2583 | -0.1494 |

Dipole moment (in D) 2.20 (DEN) 2.44 1.68 1.43 1.63 1.95 2.27 3.19 4.95 2.14

-----  
File TZVPMol473.out

Molecule PMol473 1,1-dichloro-2-fluoropro

SP Mol473 B3LYP/Def2TZVP VAC.

0 9

Dipole 1.5058 1.2144 0.0000 1.9345

Quadrupole 2.2603 -1.5798 -0.6805 2.6858 0.0000 0.0000

|    | Atomic coordinates (in A) |         |         | Mul.    | Lowdin  | Hirsch. | I-Hirsch | CM5     | ESP     | NPA     | AIM     | ACP     |
|----|---------------------------|---------|---------|---------|---------|---------|----------|---------|---------|---------|---------|---------|
| 6  | -0.2465                   | 0.0411  | 0.0000  | 0.0093  | -0.8063 | 0.0032  | -0.0756  | 0.0032  | -0.2595 | -0.2069 | 0.2146  | 0.1349  |
| 6  | 1.0613                    | -0.2319 | 0.0000  | 0.2270  | -0.3768 | 0.0862  | 0.3377   | 0.0937  | 0.4925  | 0.3631  | 0.5928  | 0.1879  |
| 6  | 2.1999                    | 0.7026  | 0.0000  | -0.3215 | -0.2623 | -0.0823 | -0.5110  | -0.2247 | -0.4491 | -0.6599 | 0.0385  | -0.2509 |
| 1  | 2.8255                    | 0.5351  | 0.8774  | 0.1307  | 0.1374  | 0.0493  | 0.1467   | 0.1021  | 0.1458  | 0.2288  | 0.0398  | 0.0962  |
| 1  | 2.8255                    | 0.5351  | -0.8773 | 0.1307  | 0.1374  | 0.0493  | 0.1467   | 0.1021  | 0.1458  | 0.2288  | 0.0398  | 0.0962  |
| 1  | 1.8676                    | 1.7346  | -0.0000 | 0.1307  | 0.1322  | 0.0415  | 0.1337   | 0.0964  | 0.1274  | 0.2366  | 0.0503  | 0.0867  |
| 9  | 1.4304                    | -1.5196 | 0.0000  | -0.1925 | 0.2013  | -0.0967 | -0.1644  | -0.1218 | -0.2196 | -0.3034 | -0.6530 | -0.1642 |
| 17 | -0.8345                   | 1.6533  | -0.0000 | -0.0644 | 0.4131  | -0.0224 | 0.0010   | -0.0239 | 0.0015  | 0.0483  | -0.1723 | -0.0848 |
| 17 | -1.4291                   | -1.1944 | 0.0000  | -0.0499 | 0.4240  | -0.0282 | -0.0149  | -0.0273 | 0.0153  | 0.0647  | -0.1507 | -0.1019 |

Dipole moment (in D) 1.93 (DEN) 2.37 2.08 1.28 1.19 1.77 1.98 2.80 4.81 1.94

-----  
File TZVPMol474.out

Molecule PMol474 chlorotrifluoromethane

SP Mol474 B3LYP/Def2TZVP VAC.

0 5

Dipole 0.3952 -0.0002 0.0000 0.3952

Quadrupole 1.1042 -0.5520 -0.5521 -0.0001 0.0000 0.0000

|    | Atomic coordinates (in A) |         |         | Mul.    | Lowdin  | Hirsch. | I-Hirsch | CM5     | ESP     | NPA     | AIM     | ACP     |
|----|---------------------------|---------|---------|---------|---------|---------|----------|---------|---------|---------|---------|---------|
| 6  | -0.3508                   | 0.0001  | 0.0000  | 0.4813  | -1.0297 | 0.3034  | 1.0364   | 0.3620  | 0.2050  | 0.9057  | 2.0304  | 0.6036  |
| 9  | -0.8093                   | 1.2407  | 0.0000  | -0.1420 | 0.2160  | -0.0887 | -0.2852  | -0.1101 | -0.0659 | -0.2934 | -0.6319 | -0.1632 |
| 9  | -0.8093                   | -0.6201 | 1.0744  | -0.1420 | 0.2160  | -0.0887 | -0.2852  | -0.1101 | -0.0640 | -0.2934 | -0.6319 | -0.1632 |
| 9  | -0.8093                   | -0.6201 | -1.0744 | -0.1420 | 0.2160  | -0.0887 | -0.2852  | -0.1101 | -0.0640 | -0.2934 | -0.6319 | -0.1632 |
| 17 | 1.4091                    | -0.0003 | 0.0000  | -0.0553 | 0.3818  | -0.0372 | -0.1809  | -0.0316 | -0.0111 | -0.0255 | -0.1337 | -0.1141 |

Dipole moment (in D) 0.40 (DEN) 0.47 1.80 0.27 0.36 0.46 0.33 1.72 3.04 0.11

-----  
File TZVPMol475.out

Molecule PMol475 dichlorofluoromethane

SP Mol475 B3LYP/Def2TZVP VAC.

0 5

Dipole -1.1336 0.5407 0.0000 1.2559

Quadrupole -0.0380 0.2887 -0.2507 -1.9106 0.0000 0.0000

|    | Atomic coordinates (in A) |         |         | Mul.    | Lowdin  | Hirsch. | I-Hirsch | CM5     | ESP     | NPA     | AIM     | ACP     |
|----|---------------------------|---------|---------|---------|---------|---------|----------|---------|---------|---------|---------|---------|
| 6  | -0.1763                   | 0.5190  | 0.0000  | 0.1748  | -0.9296 | 0.1439  | 0.3629   | 0.1141  | -0.1643 | 0.1320  | 0.8727  | 0.2857  |
| 1  | -1.0787                   | 1.1242  | 0.0000  | 0.1299  | 0.1072  | 0.0603  | 0.0602   | 0.1212  | 0.2357  | 0.1872  | 0.1215  | 0.1032  |
| 17 | -0.1763                   | -0.4718 | 1.4617  | -0.0729 | 0.3309  | -0.0530 | -0.1141  | -0.0549 | -0.0155 | -0.0086 | -0.1786 | -0.1144 |
| 9  | 0.9035                    | 1.3115  | 0.0000  | -0.1588 | 0.1608  | -0.0984 | -0.1950  | -0.1256 | -0.0404 | -0.3021 | -0.6365 | -0.1601 |
| 17 | -0.1763                   | -0.4718 | -1.4617 | -0.0729 | 0.3309  | -0.0530 | -0.1141  | -0.0549 | -0.0155 | -0.0086 | -0.1786 | -0.1144 |

Dipole moment (in D) 1.26 (DEN) 1.46 2.26 0.83 1.37 1.24 1.41 2.44 3.85 1.50

-----  
File TZVPMol476.out

Molecule PMol476 1-chloro-1,1-difluoroeth

SP Mol476 B3LYP/Def2TZVP VAC.

0 8

Dipole 0.6648 2.0858 0.0000 2.1892

Quadrupole 0.1733 1.3064 -1.4796 1.7837 0.0000 0.0000

|    | Atomic coordinates (in A) |         |         | Mul.    | Lowdin  | Hirsch. | I-Hirsch | CM5     | ESP     | NPA     | AIM     | ACP     |
|----|---------------------------|---------|---------|---------|---------|---------|----------|---------|---------|---------|---------|---------|
| 6  | 0.8115                    | 1.4274  | 0.0000  | -0.3280 | -0.2813 | -0.0910 | -0.6560  | -0.2326 | -0.4406 | -0.6624 | 0.0472  | -0.2604 |
| 1  | 0.4435                    | 1.9367  | 0.8847  | 0.1303  | 0.1352  | 0.0510  | 0.1623   | 0.1052  | 0.1587  | 0.2321  | 0.0501  | 0.0974  |
| 1  | 0.4435                    | 1.9367  | -0.8847 | 0.1303  | 0.1352  | 0.0510  | 0.1623   | 0.1052  | 0.1587  | 0.2321  | 0.0501  | 0.0974  |
| 1  | 1.8991                    | 1.4437  | 0.0000  | 0.1269  | 0.1353  | 0.0512  | 0.1628   | 0.1054  | 0.1840  | 0.2289  | 0.0461  | 0.0964  |
| 6  | 0.3527                    | 0.0038  | 0.0000  | 0.3974  | -0.8254 | 0.2285  | 0.8179   | 0.2543  | 0.3005  | 0.6636  | 1.3082  | 0.4659  |
| 9  | 0.8115                    | -0.6543 | -1.0787 | -0.1711 | 0.1835  | -0.1068 | -0.2447  | -0.1310 | -0.1339 | -0.3162 | -0.6438 | -0.1756 |
| 9  | 0.8115                    | -0.6543 | 1.0787  | -0.1711 | 0.1835  | -0.1068 | -0.2447  | -0.1310 | -0.1339 | -0.3162 | -0.6438 | -0.1756 |
| 17 | -1.4340                   | -0.1250 | 0.0000  | -0.1149 | 0.3338  | -0.0772 | -0.1597  | -0.0754 | -0.0936 | -0.0618 | -0.2136 | -0.1456 |

Dipole moment (in D) 2.19 (DEN) 2.28 1.56 1.46 1.31 2.01 2.24 3.43 5.80 2.02

-----  
File TZVPMol477.out

Molecule PMol477 acetylchloride

SP Mol477 B3LYP/Def2TZVP VAC.

0 7

Dipole 2.8215 0.1151 0.0000 2.8238

Quadrupole 0.9939 -2.0732 1.0793 2.6507 0.0000 0.0000

|    | Atomic coordinates (in A) |         |         | Mul.    | Lowdin  | Hirsch. | I-Hirsch | CM5     | ESP     | NPA     | AIM     | ACP     |
|----|---------------------------|---------|---------|---------|---------|---------|----------|---------|---------|---------|---------|---------|
| 1  | 1.7273                    | 1.7663  | 0.0000  | 0.1341  | 0.1352  | 0.0550  | 0.1642   | 0.1100  | 0.1147  | 0.2339  | 0.0536  | 0.1008  |
| 6  | 1.4763                    | 0.7099  | 0.0000  | -0.2989 | -0.2838 | -0.0725 | -0.5841  | -0.2149 | -0.2689 | -0.7070 | 0.0206  | -0.2408 |
| 6  | 0.0000                    | 0.5372  | 0.0000  | 0.2138  | -0.6111 | 0.1996  | 0.6993   | 0.2275  | 0.5435  | 0.5618  | 1.1921  | 0.4162  |
| 8  | -0.8355                   | 1.3709  | 0.0000  | -0.1916 | 0.1857  | -0.2021 | -0.4403  | -0.2511 | -0.3933 | -0.4646 | -1.1256 | -0.3304 |
| 1  | 1.9040                    | 0.2216  | 0.8732  | 0.1423  | 0.1429  | 0.0579  | 0.1638   | 0.1115  | 0.0985  | 0.2468  | 0.0622  | 0.1062  |
| 1  | 1.9040                    | 0.2216  | -0.8732 | 0.1423  | 0.1429  | 0.0579  | 0.1638   | 0.1115  | 0.0985  | 0.2468  | 0.0622  | 0.1062  |
| 17 | -0.4535                   | -1.2153 | 0.0000  | -0.1420 | 0.2883  | -0.0958 | -0.1666  | -0.0946 | -0.1930 | -0.1176 | -0.2646 | -0.1581 |

Dipole mement (in D) 2.82 (DEN) 2.73 1.59 2.02 2.38 2.64 2.85 3.66 7.15 2.74

-----  
File TZVPMol478.out

Molecule PMol478 phosgene  
SP Mol478 B3LYP/Def2TZVP VAC.

0 4

Dipole 0.0000 0.0000 -1.3184 1.3184

Quadrupole 1.0635 1.6532 -2.7167 0.0000 0.0000 0.0000

|    | Atomic coordinates (in A) |         |         | Mul.    | Lowdin  | Hirsch. | I-Hirsch | CM5     | ESP     | NPA     | AIM     | ACP     |
|----|---------------------------|---------|---------|---------|---------|---------|----------|---------|---------|---------|---------|---------|
| 6  | 0.0000                    | 0.0000  | 0.4981  | 0.2009  | -0.9776 | 0.1987  | 0.6157   | 0.2381  | 0.3733  | 0.4137  | 1.3562  | 0.4651  |
| 8  | 0.0000                    | 0.0000  | 1.6730  | -0.1569 | 0.1833  | -0.1867 | -0.4334  | -0.2333 | -0.2897 | -0.4485 | -1.0989 | -0.3173 |
| 17 | 0.0000                    | 1.4402  | -0.4815 | -0.0220 | 0.3972  | -0.0061 | -0.0912  | -0.0025 | -0.0418 | 0.0174  | -0.1286 | -0.0739 |
| 17 | 0.0000                    | -1.4402 | -0.4815 | -0.0220 | 0.3972  | -0.0061 | -0.0912  | -0.0025 | -0.0418 | 0.0174  | -0.1286 | -0.0739 |

Dipole mement (in D) 1.32 (DEN) 0.68 2.70 1.00 1.59 1.29 1.24 2.69 4.99 1.09

-----  
File TZVPMol479.out

Molecule PMol479 para-chlorophenol  
SP Mol479 B3LYP/Def2TZVP VAC.

0 13

Dipole -1.3155 -1.8273 0.0000 2.2516

Quadrupole 5.5189 -1.2535 -4.2654 5.5082 0.0000 0.0000

|    | Atomic coordinates (in A) |         |        | Mul.    | Lowdin  | Hirsch. | I-Hirsch | CM5     | ESP     | NPA     | AIM     | ACP     |
|----|---------------------------|---------|--------|---------|---------|---------|----------|---------|---------|---------|---------|---------|
| 6  | 0.0000                    | 0.9595  | 0.0000 | 0.1564  | -0.4409 | 0.0099  | 0.1240   | 0.0023  | -0.0803 | -0.0759 | 0.0737  | 0.0878  |
| 6  | -1.2013                   | 0.2685  | 0.0000 | -0.1738 | -0.1417 | -0.0412 | -0.1360  | -0.0938 | 0.0377  | -0.2010 | 0.0142  | -0.0869 |
| 6  | -1.1936                   | -1.1183 | 0.0000 | -0.1861 | -0.1390 | -0.0609 | -0.2597  | -0.1129 | -0.4091 | -0.2756 | -0.0255 | -0.1127 |
| 6  | 0.0118                    | -1.8116 | 0.0000 | 0.2704  | -0.2756 | 0.0734  | 0.4154   | 0.0849  | 0.4436  | 0.2836  | 0.5152  | 0.1796  |
| 6  | 1.2132                    | -1.1102 | 0.0000 | -0.1773 | -0.1122 | -0.0489 | -0.2238  | -0.0995 | -0.3187 | -0.2448 | -0.0065 | -0.1013 |
| 6  | 1.2075                    | 0.2734  | 0.0000 | -0.1459 | -0.1379 | -0.0386 | -0.1392  | -0.0911 | -0.0147 | -0.1998 | 0.0139  | -0.0846 |
| 1  | 2.1441                    | -1.6607 | 0.0000 | 0.1186  | 0.1508  | 0.0496  | 0.1332   | 0.1090  | 0.1914  | 0.2239  | 0.0566  | 0.0859  |
| 1  | 2.1378                    | 0.8240  | 0.0000 | 0.1201  | 0.1483  | 0.0478  | 0.1142   | 0.1052  | 0.1207  | 0.2233  | 0.0562  | 0.0861  |
| 1  | -2.1364                   | 0.8109  | 0.0000 | 0.1211  | 0.1478  | 0.0472  | 0.1144   | 0.1047  | 0.1127  | 0.2233  | 0.0559  | 0.0856  |
| 1  | -2.1317                   | -1.6617 | 0.0000 | 0.1045  | 0.1429  | 0.0413  | 0.1124   | 0.0996  | 0.1725  | 0.2061  | 0.0250  | 0.0852  |
| 17 | -0.0044                   | 2.6945  | 0.0000 | -0.1250 | 0.3834  | -0.0662 | -0.0827  | -0.0682 | -0.0988 | 0.0038  | -0.2454 | -0.1274 |
| 8  | 0.0803                    | -3.1693 | 0.0000 | -0.3921 | 0.0893  | -0.1850 | -0.6080  | -0.3873 | -0.5679 | -0.6391 | -1.1109 | -0.3669 |
| 1  | -0.8080                   | -3.5332 | 0.0000 | 0.3094  | 0.1848  | 0.1716  | 0.4359   | 0.3471  | 0.4109  | 0.4722  | 0.5774  | 0.2697  |

Dipole mement (in D) 2.25 (DEN) 2.09 0.78 1.52 1.87 2.02 2.31 1.77 2.21 1.91

-----  
File TZVPMol480.out

Molecule PMol480 cyanogen\_chloride  
SP Mol480 B3LYP/Def2TZVP VAC.

0 3

Dipole 0.0000 0.0000 3.0442 3.0442

Quadrupole 1.3538 1.3538 -2.7076 0.0000 0.0000 0.0000

|                      | Atomic coordinates (in A) |        |            | Mul.    | Lowdin  | Hirsch. | I-Hirsch | CM5     | ESP     | NPA     | AIM     | ACP     |
|----------------------|---------------------------|--------|------------|---------|---------|---------|----------|---------|---------|---------|---------|---------|
| 17                   | 0.0000                    | 0.0000 | 0.9711     | 0.0842  | 0.5805  | 0.1235  | 0.1028   | 0.1282  | 0.1086  | 0.1737  | 0.0045  | 0.0622  |
| 6                    | 0.0000                    | 0.0000 | -0.6456    | -0.0660 | -0.6224 | 0.0748  | 0.2667   | 0.1915  | 0.2648  | 0.1224  | 1.0884  | 0.2903  |
| 7                    | 0.0000                    | 0.0000 | -1.8049    | -0.0183 | 0.0418  | -0.1983 | -0.3694  | -0.3198 | -0.3734 | -0.2961 | -1.0928 | -0.3525 |
| Dipole mement (in D) |                           |        | 3.04 (DEN) | 0.76    | 4.28    | 2.06    | 2.86     | 2.78    | 2.92    | 3.00    | 6.12    | 2.45    |

-----  
File TZVPMol481.out  
Molecule PMol481 1-chloro-2-nitrobenzene  
SP Mol481 B3LYP/Def2TZVP VAC.  
0 14

|                      | Atomic coordinates (in A) |         |            | Mul.    | Lowdin  | Hirsch. | I-Hirsch | CM5     | ESP     | NPA     | AIM     | ACP     |
|----------------------|---------------------------|---------|------------|---------|---------|---------|----------|---------|---------|---------|---------|---------|
| Dipole               | 4.8619                    | 0.2072  | 0.0722     | 4.8668  |         |         |          |         |         |         |         |         |
| Quadrupole           | 0.2609                    | 2.0636  | -2.3245    | -3.6289 | 0.7771  | -2.0882 |          |         |         |         |         |         |
| 6                    | 0.3628                    | 0.7787  | -0.0159    | 0.0206  | -0.4056 | 0.0323  | 0.1344   | 0.0328  | -0.1547 | -0.0432 | 0.1195  | 0.1123  |
| 6                    | -0.0797                   | -0.5442 | 0.0226     | 0.1425  | -0.1551 | 0.0237  | -0.0681  | 0.0785  | 0.2384  | 0.0069  | 0.2437  | 0.1162  |
| 6                    | 0.8253                    | -1.5962 | 0.0544     | -0.1675 | -0.0876 | -0.0228 | -0.0991  | -0.0695 | -0.2926 | -0.1706 | 0.0162  | -0.0673 |
| 6                    | 2.1830                    | -1.3432 | 0.0851     | -0.0776 | -0.1255 | -0.0279 | -0.0951  | -0.0835 | -0.0149 | -0.2063 | -0.0034 | -0.0746 |
| 6                    | 2.6335                    | -0.0298 | 0.0531     | -0.1059 | -0.1133 | -0.0167 | -0.0440  | -0.0724 | -0.2136 | -0.1677 | -0.0075 | -0.0622 |
| 6                    | 1.7331                    | 1.0196  | -0.0091    | -0.1304 | -0.1303 | -0.0339 | -0.1838  | -0.0865 | 0.0754  | -0.2110 | 0.0175  | -0.0820 |
| 1                    | 0.4319                    | -2.6028 | 0.0606     | 0.1544  | 0.1606  | 0.0544  | 0.1296   | 0.1194  | 0.1849  | 0.2437  | 0.0925  | 0.0884  |
| 1                    | 2.8844                    | -2.1648 | 0.1289     | 0.1281  | 0.1497  | 0.0528  | 0.1118   | 0.1091  | 0.1206  | 0.2213  | 0.0522  | 0.0984  |
| 1                    | 3.6941                    | 0.1840  | 0.0685     | 0.1275  | 0.1503  | 0.0539  | 0.1105   | 0.1101  | 0.1503  | 0.2195  | 0.0520  | 0.0995  |
| 1                    | 2.0764                    | 2.0432  | -0.0588    | 0.1294  | 0.1516  | 0.0520  | 0.1189   | 0.1098  | 0.0792  | 0.2301  | 0.0675  | 0.0912  |
| 7                    | -1.5061                   | -0.9064 | 0.0389     | 0.4051  | -0.0339 | 0.2429  | 0.7345   | 0.0784  | 0.6180  | 0.5011  | 0.4488  | 0.2242  |
| 8                    | -1.8141                   | -1.9384 | -0.5402    | -0.3024 | -0.0163 | -0.2013 | -0.4204  | -0.1620 | -0.4056 | -0.3605 | -0.4765 | -0.2285 |
| 8                    | -2.2714                   | -0.1789 | 0.6469     | -0.2800 | -0.0051 | -0.1949 | -0.4263  | -0.1520 | -0.3730 | -0.3374 | -0.4577 | -0.2270 |
| 17                   | -0.6946                   | 2.1243  | -0.1451    | -0.0437 | 0.4604  | -0.0144 | -0.0030  | -0.0121 | -0.0125 | 0.0739  | -0.1655 | -0.0887 |
| Dipole mement (in D) |                           |         | 4.87 (DEN) | 4.63    | 2.89    | 3.68    | 4.81     | 4.60    | 4.94    | 5.97    | 9.16    | 5.00    |

-----  
File TZVPMol482.out  
Molecule PMol482 1-chloro-3-nitrobenzene  
SP Mol482 B3LYP/Def2TZVP VAC.  
0 14

|            | Atomic coordinates (in A) |         |         | Mul.    | Lowdin  | Hirsch. | I-Hirsch | CM5     | ESP     | NPA     | AIM     | ACP     |
|------------|---------------------------|---------|---------|---------|---------|---------|----------|---------|---------|---------|---------|---------|
| Dipole     | -2.7967                   | 2.8293  | 0.0001  | 3.9782  |         |         |          |         |         |         |         |         |
| Quadrupole | -8.3509                   | 6.5061  | 1.8448  | 1.7627  | 0.0003  | -0.0001 |          |         |         |         |         |         |
| 6          | -1.4256                   | 0.0015  | 0.0000  | 0.2111  | -0.4234 | 0.0323  | 0.1633   | 0.0252  | 0.0132  | -0.0471 | 0.0923  | 0.1108  |
| 6          | -0.2025                   | -0.6486 | 0.0000  | -0.2350 | -0.0936 | -0.0313 | -0.2186  | -0.0750 | -0.1290 | -0.2032 | 0.0389  | -0.0779 |
| 6          | 0.9412                    | 0.1309  | 0.0000  | 0.0941  | -0.1509 | 0.0305  | 0.0336   | 0.0811  | 0.1107  | 0.0365  | 0.2089  | 0.1261  |
| 6          | 0.9076                    | 1.5145  | 0.0000  | -0.1692 | -0.0903 | -0.0260 | -0.1275  | -0.0733 | -0.2191 | -0.1907 | 0.0128  | -0.0715 |
| 6          | -0.3300                   | 2.1376  | 0.0000  | -0.0620 | -0.1166 | -0.0206 | -0.0577  | -0.0759 | -0.1213 | -0.1867 | -0.0007 | -0.0673 |
| 6          | -1.4988                   | 1.3899  | 0.0000  | -0.1661 | -0.1177 | -0.0244 | -0.1562  | -0.0771 | -0.0493 | -0.1924 | 0.0145  | -0.0722 |
| 1          | 1.8339                    | 2.0689  | 0.0000  | 0.1627  | 0.1598  | 0.0542  | 0.1325   | 0.1188  | 0.1792  | 0.2491  | 0.1009  | 0.0872  |
| 1          | -0.3891                   | 3.2176  | -0.0000 | 0.1302  | 0.1515  | 0.0547  | 0.1141   | 0.1111  | 0.1489  | 0.2222  | 0.0553  | 0.1005  |

|    |         |         |         |         |         |         |         |         |         |         |         |         |
|----|---------|---------|---------|---------|---------|---------|---------|---------|---------|---------|---------|---------|
| 1  | -2.4661 | 1.8725  | -0.0000 | 0.1328  | 0.1516  | 0.0544  | 0.1198  | 0.1118  | 0.1215  | 0.2291  | 0.0685  | 0.0940  |
| 17 | -2.8811 | -0.9280 | 0.0000  | -0.0860 | 0.4207  | -0.0335 | -0.0455 | -0.0355 | -0.0615 | 0.0352  | -0.2104 | -0.0966 |
| 1  | -0.1255 | -1.7253 | 0.0000  | 0.1673  | 0.1626  | 0.0559  | 0.1452  | 0.1216  | 0.1508  | 0.2596  | 0.1175  | 0.0829  |
| 7  | 2.2524  | -0.5514 | 0.0000  | 0.4291  | -0.0242 | 0.2462  | 0.7265  | 0.0817  | 0.6636  | 0.5035  | 0.4500  | 0.2291  |
| 8  | 3.2497  | 0.1534  | -0.0000 | -0.3051 | -0.0150 | -0.1966 | -0.4172 | -0.1576 | -0.4055 | -0.3577 | -0.4743 | -0.2229 |
| 8  | 2.2511  | -1.7725 | -0.0000 | -0.3039 | -0.0144 | -0.1957 | -0.4125 | -0.1568 | -0.4022 | -0.3574 | -0.4739 | -0.2222 |

Dipole moment (in D) 3.98 (DEN) 4.10 4.30 3.05 4.05 3.70 3.98 5.14 6.90 3.69

-----  
File TZVPMol483.out

Molecule PMol483 1-chloro-4-nitrobenzene

SP Mol483 B3LYP/Def2TZVP VAC.

0 14

Dipole 0.0000 0.0000 3.3082 3.3082  
 Quadrupole 3.2682 8.6924 -11.9606 0.0000 0.0000 0.0000

|    | Atomic coordinates (in A) |         |         | Mul.    | Lowdin  | Hirsch. | I-Hirsch | CM5     | ESP     | NPA     | AIM     | ACP     |
|----|---------------------------|---------|---------|---------|---------|---------|----------|---------|---------|---------|---------|---------|
| 6  | 0.0000                    | 0.0000  | 1.6416  | 0.1677  | -0.4163 | 0.0395  | 0.1782   | 0.0320  | -0.0877 | -0.0244 | 0.0841  | 0.1191  |
| 6  | 0.0000                    | 1.2125  | 0.9602  | -0.1293 | -0.1269 | -0.0319 | -0.1818  | -0.0842 | 0.0692  | -0.2192 | 0.0220  | -0.0806 |
| 6  | 0.0000                    | 1.2119  | -0.4225 | -0.1571 | -0.0825 | -0.0186 | -0.0833  | -0.0655 | -0.3046 | -0.1671 | 0.0163  | -0.0634 |
| 6  | 0.0000                    | 0.0000  | -1.0943 | 0.0863  | -0.1578 | 0.0246  | -0.0052  | 0.0762  | 0.2208  | 0.0152  | 0.2162  | 0.1206  |
| 6  | 0.0000                    | -1.2119 | -0.4225 | -0.1571 | -0.0825 | -0.0186 | -0.0833  | -0.0655 | -0.3046 | -0.1671 | 0.0164  | -0.0634 |
| 6  | 0.0000                    | -1.2125 | 0.9602  | -0.1293 | -0.1269 | -0.0319 | -0.1818  | -0.0842 | 0.0692  | -0.2192 | 0.0219  | -0.0806 |
| 1  | 0.0000                    | -2.1317 | -0.9889 | 0.1633  | 0.1616  | 0.0561  | 0.1340   | 0.1207  | 0.1845  | 0.2500  | 0.1036  | 0.0890  |
| 1  | 0.0000                    | -2.1405 | 1.5135  | 0.1342  | 0.1523  | 0.0546  | 0.1244   | 0.1122  | 0.0996  | 0.2317  | 0.0704  | 0.0943  |
| 17 | 0.0000                    | 0.0000  | 3.3654  | -0.0817 | 0.4289  | -0.0275 | -0.0411  | -0.0296 | -0.0507 | 0.0416  | -0.2072 | -0.0904 |
| 1  | 0.0000                    | 2.1405  | 1.5135  | 0.1342  | 0.1523  | 0.0546  | 0.1244   | 0.1122  | 0.0996  | 0.2317  | 0.0703  | 0.0943  |
| 7  | 0.0000                    | 0.0000  | -2.5644 | 0.4225  | -0.0246 | 0.2442  | 0.7289   | 0.0789  | 0.6144  | 0.5021  | 0.4390  | 0.2255  |
| 8  | 0.0000                    | -1.0851 | -3.1278 | -0.3085 | -0.0196 | -0.2007 | -0.4236  | -0.1619 | -0.3971 | -0.3625 | -0.4780 | -0.2266 |
| 8  | 0.0000                    | 1.0851  | -3.1278 | -0.3085 | -0.0196 | -0.2007 | -0.4236  | -0.1619 | -0.3971 | -0.3625 | -0.4780 | -0.2266 |
| 1  | 0.0000                    | 2.1317  | -0.9889 | 0.1633  | 0.1616  | 0.0561  | 0.1340   | 0.1207  | 0.1845  | 0.2500  | 0.1036  | 0.0890  |

Dipole moment (in D) 3.31 (DEN) 3.46 5.22 2.80 3.72 3.24 3.26 4.76 5.31 2.91

-----  
File TZVPMol587.out

Molecule PMol587 HBr

SP Mol587 B3LYP/Def2TZVP VAC.

0 2

Dipole 0.0000 0.0000 -0.9193 0.9193  
 Quadrupole -1.4230 -1.4230 2.8459 0.0000 0.0000 0.0000

|    | Atomic coordinates (in A) |        |         | Mul.    | Lowdin  | Hirsch. | I-Hirsch | CM5     | ESP     | NPA     | AIM     | ACP     |
|----|---------------------------|--------|---------|---------|---------|---------|----------|---------|---------|---------|---------|---------|
| 35 | 0.0000                    | 0.0000 | 0.0394  | -0.1927 | -0.0482 | -0.0898 | -0.1745  | -0.1338 | -0.1629 | -0.1966 | -0.1201 | -0.1214 |
| 1  | 0.0000                    | 0.0000 | -1.3794 | 0.1927  | 0.0482  | 0.0898  | 0.1745   | 0.1338  | 0.1629  | 0.1966  | 0.1201  | 0.1214  |

Dipole moment (in D) 0.92 (DEN) 1.31 0.33 0.61 1.19 0.91 1.11 1.34 0.82 0.83

-----

File TZVPMol588.out

Molecule PMol588 bromomethane

SP Mol588 B3LYP/Def2TZVP VAC.

0 5

Dipole -1.8947 0.0000 0.0003 1.8947

Quadrupole 2.4248 -1.2121 -1.2126 0.0000 0.0002 0.0000

|    | Atomic coordinates (in A) |         |         | Mul.    | Lowdin  | Hirsch. | I-Hirsch | CM5     | ESP     | NPA     | AIM     | ACP     |
|----|---------------------------|---------|---------|---------|---------|---------|----------|---------|---------|---------|---------|---------|
| 35 | 0.4184                    | 0.0000  | -0.0000 | -0.1189 | 0.1875  | -0.0850 | -0.0257  | -0.0812 | -0.0860 | -0.0096 | -0.1424 | -0.1249 |
| 6  | -1.5120                   | 0.0000  | -0.0000 | -0.3057 | -0.5075 | -0.0552 | -0.3619  | -0.2139 | -0.6290 | -0.6296 | -0.0298 | -0.1928 |
| 1  | -1.8574                   | 0.9213  | -0.4534 | 0.1415  | 0.1067  | 0.0467  | 0.1292   | 0.0984  | 0.2385  | 0.2131  | 0.0575  | 0.1059  |
| 1  | -1.8573                   | -0.8534 | -0.5711 | 0.1415  | 0.1067  | 0.0467  | 0.1292   | 0.0984  | 0.2386  | 0.2131  | 0.0575  | 0.1059  |
| 1  | -1.8572                   | -0.0680 | 1.0246  | 0.1415  | 0.1066  | 0.0467  | 0.1292   | 0.0984  | 0.2379  | 0.2130  | 0.0575  | 0.1059  |

Dipole mement (in D) 1.89 (DEN) 1.81 1.21 1.02 0.88 1.24 1.98 1.15 1.61 1.69

File TZVPMol589.out

Molecule PMol589 dibromomethane

SP Mol589 B3LYP/Def2TZVP VAC.

0 5

Dipole 0.0000 1.4994 0.0000 1.4994

Quadrupole -0.2851 2.0808 -1.7957 0.0000 0.0000 0.0000

|    | Atomic coordinates (in A) |         |         | Mul.    | Lowdin  | Hirsch. | I-Hirsch | CM5     | ESP     | NPA     | AIM     | ACP     |
|----|---------------------------|---------|---------|---------|---------|---------|----------|---------|---------|---------|---------|---------|
| 35 | 0.0000                    | -0.1227 | 1.6205  | -0.0627 | 0.2429  | -0.0477 | -0.0088  | -0.0410 | 0.0433  | 0.0437  | -0.0785 | -0.0870 |
| 6  | 0.0000                    | 0.9208  | 0.0000  | -0.1928 | -0.7094 | -0.0117 | -0.2340  | -0.1352 | -0.7917 | -0.5327 | -0.0433 | -0.0541 |
| 35 | 0.0000                    | -0.1227 | -1.6205 | -0.0627 | 0.2429  | -0.0477 | -0.0088  | -0.0410 | 0.0433  | 0.0437  | -0.0785 | -0.0870 |
| 1  | -0.8922                   | 1.5334  | 0.0000  | 0.1591  | 0.1118  | 0.0535  | 0.1258   | 0.1086  | 0.3535  | 0.2226  | 0.1002  | 0.1141  |
| 1  | 0.8922                    | 1.5333  | 0.0000  | 0.1591  | 0.1118  | 0.0535  | 0.1258   | 0.1086  | 0.3517  | 0.2226  | 0.1002  | 0.1141  |

Dipole mement (in D) 1.50 (DEN) 1.56 1.78 0.79 0.83 1.05 1.64 0.87 1.38 1.54

File TZVPMol590.out

Molecule PMol590 bromoform

SP Mol590 B3LYP/Def2TZVP VAC.

0 5

Dipole -0.7699 0.4626 0.0000 0.8982

Quadrupole 0.4714 -0.0807 -0.3907 -0.5236 0.0000 0.0000

|    | Atomic coordinates (in A) |         |         | Mul.    | Lowdin  | Hirsch. | I-Hirsch | CM5     | ESP     | NPA     | AIM     | ACP     |
|----|---------------------------|---------|---------|---------|---------|---------|----------|---------|---------|---------|---------|---------|
| 1  | -1.3657                   | 0.8238  | 0.0000  | 0.1679  | 0.1143  | 0.0545  | 0.1026   | 0.1131  | 0.4344  | 0.2242  | 0.1363  | 0.1162  |
| 6  | -0.4398                   | 0.2649  | 0.0000  | -0.1037 | -0.9481 | 0.0206  | -0.0215  | -0.0668 | -0.8591 | -0.4884 | -0.0584 | 0.0718  |
| 35 | 0.9941                    | 1.5616  | 0.0000  | -0.0216 | 0.2776  | -0.0252 | -0.0272  | -0.0155 | 0.1417  | 0.0878  | -0.0261 | -0.0629 |
| 35 | -0.4398                   | -0.8153 | 1.6029  | -0.0212 | 0.2781  | -0.0250 | -0.0270  | -0.0154 | 0.1415  | 0.0882  | -0.0257 | -0.0626 |
| 35 | -0.4398                   | -0.8153 | -1.6029 | -0.0212 | 0.2781  | -0.0250 | -0.0270  | -0.0154 | 0.1415  | 0.0882  | -0.0257 | -0.0626 |

Dipole mement (in D) 0.90 (DEN) 1.04 1.64 0.48 0.75 0.71 1.12 0.46 0.92 1.11

File TZVPMol591.out

Molecule PMol591 bromoethane

SP Mol591 B3LYP/Def2TZVP VAC.

0 8

|                      |                           |         |         |         |         |         |          |         |         |         |         |         |
|----------------------|---------------------------|---------|---------|---------|---------|---------|----------|---------|---------|---------|---------|---------|
| Dipole               | 0.4659                    | -2.0995 | 0.0000  | 2.1506  |         |         |          |         |         |         |         |         |
| Quadrupole           | -0.4978                   | 1.2659  | -0.7681 | -0.9895 | 0.0000  | 0.0000  |          |         |         |         |         |         |
|                      | Atomic coordinates (in A) |         |         | Mul.    | Lowdin  | Hirsch. | I-Hirsch | CM5     | ESP     | NPA     | AIM     | ACP     |
| 35                   | 0.0000                    | 0.7929  | 0.0000  | -0.1440 | 0.1973  | -0.0938 | -0.0710  | -0.0883 | -0.1860 | -0.0374 | -0.1750 | -0.1433 |
| 6                    | 0.5922                    | -1.0684 | 0.0000  | -0.1521 | -0.4736 | -0.0157 | -0.0998  | -0.1349 | -0.0565 | -0.3992 | 0.0032  | -0.0818 |
| 6                    | -0.5672                   | -2.0252 | 0.0000  | -0.3078 | -0.3362 | -0.0842 | -0.3819  | -0.2358 | -0.0683 | -0.6160 | 0.0324  | -0.2392 |
| 1                    | 1.2191                    | -1.1747 | 0.8807  | 0.1278  | 0.1228  | 0.0420  | 0.1005   | 0.0968  | 0.0904  | 0.2088  | 0.0464  | 0.0980  |
| 1                    | 1.2191                    | -1.1747 | -0.8807 | 0.1278  | 0.1228  | 0.0420  | 0.1005   | 0.0968  | 0.0904  | 0.2088  | 0.0464  | 0.0980  |
| 1                    | -0.1991                   | -3.0521 | 0.0000  | 0.1099  | 0.1240  | 0.0387  | 0.1196   | 0.0901  | 0.0424  | 0.2117  | 0.0098  | 0.0920  |
| 1                    | -1.1945                   | -1.8950 | -0.8795 | 0.1193  | 0.1215  | 0.0355  | 0.1161   | 0.0877  | 0.0439  | 0.2117  | 0.0185  | 0.0882  |
| 1                    | -1.1945                   | -1.8950 | 0.8795  | 0.1193  | 0.1215  | 0.0355  | 0.1161   | 0.0877  | 0.0439  | 0.2117  | 0.0185  | 0.0882  |
| Dipole mement (in D) | 2.15 (DEN)                |         | 2.04    | 1.15    | 1.17    | 1.15    | 1.39     | 2.26    | 1.46    | 2.02    | 1.92    |         |

-----  
File TZVPMol592.out

Molecule PMol592 1-bromopropane

SP Mol592 B3LYP/Def2TZVP VAC.

0 11

|                      |                           |         |         |         |         |         |          |         |         |         |         |         |
|----------------------|---------------------------|---------|---------|---------|---------|---------|----------|---------|---------|---------|---------|---------|
| Dipole               | 1.3181                    | 1.8092  | 0.0000  | 2.2384  |         |         |          |         |         |         |         |         |
| Quadrupole           | -0.2957                   | 0.3678  | -0.0722 | -0.0367 | 0.0000  | 0.0000  |          |         |         |         |         |         |
|                      | Atomic coordinates (in A) |         |         | Mul.    | Lowdin  | Hirsch. | I-Hirsch | CM5     | ESP     | NPA     | AIM     | ACP     |
| 6                    | 2.1871                    | 2.0308  | 0.0000  | -0.3400 | -0.3044 | -0.0798 | -0.3260  | -0.2317 | -0.3255 | -0.5874 | 0.0093  | -0.2453 |
| 6                    | 1.5014                    | 0.6755  | 0.0000  | -0.1483 | -0.3264 | -0.0487 | -0.1648  | -0.1618 | 0.3850  | -0.4153 | 0.0704  | -0.1319 |
| 6                    | 0.0000                    | 0.8271  | 0.0000  | -0.1576 | -0.4514 | -0.0192 | -0.1369  | -0.1365 | -0.3526 | -0.3973 | -0.0063 | -0.0880 |
| 1                    | 1.8084                    | 0.0948  | 0.8714  | 0.1016  | 0.1352  | 0.0316  | 0.0937   | 0.0870  | -0.0411 | 0.2042  | 0.0068  | 0.0808  |
| 1                    | 1.8084                    | 0.0948  | -0.8714 | 0.1016  | 0.1352  | 0.0316  | 0.0937   | 0.0870  | -0.0411 | 0.2042  | 0.0068  | 0.0808  |
| 35                   | -0.9182                   | -0.8932 | 0.0000  | -0.1419 | 0.2054  | -0.0932 | -0.0760  | -0.0877 | -0.1595 | -0.0308 | -0.1740 | -0.1424 |
| 1                    | 3.2703                    | 1.9262  | 0.0000  | 0.1202  | 0.1213  | 0.0359  | 0.1107   | 0.0874  | 0.0710  | 0.2120  | 0.0076  | 0.0899  |
| 1                    | 1.9157                    | 2.6170  | 0.8782  | 0.1072  | 0.1182  | 0.0307  | 0.1023   | 0.0825  | 0.0768  | 0.1981  | -0.0033 | 0.0831  |
| 1                    | 1.9157                    | 2.6170  | -0.8782 | 0.1072  | 0.1182  | 0.0307  | 0.1023   | 0.0825  | 0.0768  | 0.1981  | -0.0033 | 0.0831  |
| 1                    | -0.3569                   | 1.3559  | -0.8809 | 0.1250  | 0.1244  | 0.0403  | 0.1004   | 0.0956  | 0.1551  | 0.2071  | 0.0429  | 0.0949  |
| 1                    | -0.3569                   | 1.3559  | 0.8809  | 0.1250  | 0.1244  | 0.0403  | 0.1004   | 0.0956  | 0.1551  | 0.2071  | 0.0429  | 0.0949  |
| Dipole mement (in D) | 2.24 (DEN)                |         | 2.08    | 0.98    | 1.29    | 1.23    | 1.52     | 2.35    | 1.52    | 2.12    | 2.01    |         |

-----  
File TZVPMol593.out

Molecule PMol593 2-bromopropane

SP Mol593 B3LYP/Def2TZVP VAC.

0 11

|            |                           |         |         |         |        |         |          |     |     |     |     |     |
|------------|---------------------------|---------|---------|---------|--------|---------|----------|-----|-----|-----|-----|-----|
| Dipole     | 1.7614                    | -1.4818 | 0.0000  | 2.3018  |        |         |          |     |     |     |     |     |
| Quadrupole | 0.7533                    | -0.4336 | -0.3197 | -0.5558 | 0.0000 | 0.0000  |          |     |     |     |     |     |
|            | Atomic coordinates (in A) |         |         | Mul.    | Lowdin | Hirsch. | I-Hirsch | CM5 | ESP | NPA | AIM | ACP |

|    |         |         |         |         |         |         |         |         |         |         |         |         |
|----|---------|---------|---------|---------|---------|---------|---------|---------|---------|---------|---------|---------|
| 6  | 0.9068  | -0.4357 | 0.0000  | -0.0041 | -0.4713 | 0.0217  | 0.1407  | -0.0584 | 0.2252  | -0.1888 | 0.0248  | 0.0293  |
| 35 | -0.6727 | 0.7550  | 0.0000  | -0.1699 | 0.2097  | -0.0982 | -0.0833 | -0.0908 | -0.2202 | -0.0586 | -0.1993 | -0.1580 |
| 1  | 1.7416  | 0.2632  | 0.0000  | 0.1081  | 0.1392  | 0.0393  | 0.0807  | 0.0975  | 0.0643  | 0.2085  | 0.0398  | 0.0922  |
| 6  | 0.9068  | -1.2633 | 1.2608  | -0.3148 | -0.3100 | -0.0871 | -0.4303 | -0.2370 | -0.3460 | -0.6165 | 0.0273  | -0.2443 |
| 6  | 0.9068  | -1.2633 | -1.2608 | -0.3148 | -0.3100 | -0.0871 | -0.4303 | -0.2370 | -0.3460 | -0.6165 | 0.0269  | -0.2443 |
| 1  | 0.9033  | -0.6459 | 2.1556  | 0.1263  | 0.1227  | 0.0351  | 0.1178  | 0.0875  | 0.0946  | 0.2181  | 0.0194  | 0.0882  |
| 1  | 0.9033  | -0.6459 | -2.1556 | 0.1263  | 0.1227  | 0.0351  | 0.1178  | 0.0875  | 0.0946  | 0.2181  | 0.0194  | 0.0882  |
| 1  | 0.0383  | -1.9197 | 1.3004  | 0.1150  | 0.1235  | 0.0342  | 0.1210  | 0.0870  | 0.1115  | 0.2094  | 0.0156  | 0.0859  |
| 1  | 0.0383  | -1.9197 | -1.3004 | 0.1150  | 0.1235  | 0.0342  | 0.1210  | 0.0870  | 0.1115  | 0.2094  | 0.0156  | 0.0859  |
| 1  | 1.7996  | -1.8909 | 1.2863  | 0.1064  | 0.1249  | 0.0364  | 0.1224  | 0.0884  | 0.1053  | 0.2085  | 0.0053  | 0.0885  |
| 1  | 1.7996  | -1.8909 | -1.2863 | 0.1064  | 0.1249  | 0.0364  | 0.1224  | 0.0884  | 0.1053  | 0.2085  | 0.0053  | 0.0885  |

Dipole moment (in D) 2.30 (DEN) 2.24 1.06 1.23 1.09 1.47 2.45 1.70 2.22 2.06

-----  
File TZVPMol594.out

Molecule PMol594 1-bromobutane

SP Mol594 B3LYP/Def2TZVP VAC.

0 14

Dipole 2.2320 0.6843 0.0000 2.3345  
 Quadrupole -1.3477 0.6863 0.6614 0.5661 0.0000 0.0000

|    | Atomic coordinates (in A) |         |         | Mul.    | Lowdin  | Hirsch. | I-Hirsch | CM5     | ESP     | NPA     | AIM     | ACP     |
|----|---------------------------|---------|---------|---------|---------|---------|----------|---------|---------|---------|---------|---------|
| 6  | 3.6051                    | -0.6295 | 0.0000  | -0.3278 | -0.3063 | -0.0814 | -0.3285  | -0.2333 | -0.2949 | -0.5825 | 0.0159  | -0.2457 |
| 6  | 2.4800                    | 0.3870  | 0.0000  | -0.1584 | -0.2898 | -0.0423 | -0.1123  | -0.1553 | 0.1801  | -0.3799 | 0.0494  | -0.1350 |
| 1  | 4.5835                    | -0.1519 | 0.0000  | 0.1148  | 0.1180  | 0.0316  | 0.1023   | 0.0829  | 0.0782  | 0.2057  | -0.0006 | 0.0852  |
| 1  | 3.5562                    | -1.2751 | 0.8773  | 0.1059  | 0.1182  | 0.0299  | 0.1013   | 0.0817  | 0.0586  | 0.1977  | -0.0043 | 0.0823  |
| 1  | 3.5562                    | -1.2751 | -0.8773 | 0.1059  | 0.1182  | 0.0299  | 0.1013   | 0.0817  | 0.0586  | 0.1977  | -0.0043 | 0.0823  |
| 6  | 1.1039                    | -0.2654 | 0.0000  | -0.1772 | -0.3021 | -0.0512 | -0.2012  | -0.1625 | 0.2422  | -0.4106 | 0.0612  | -0.1373 |
| 1  | 2.5711                    | 1.0424  | 0.8709  | 0.0872  | 0.1323  | 0.0280  | 0.0829   | 0.0831  | -0.0309 | 0.1911  | -0.0146 | 0.0767  |
| 1  | 2.5711                    | 1.0424  | -0.8709 | 0.0872  | 0.1323  | 0.0280  | 0.0829   | 0.0831  | -0.0309 | 0.1911  | -0.0146 | 0.0767  |
| 6  | 0.0000                    | 0.7619  | 0.0000  | -0.1444 | -0.4485 | -0.0192 | -0.1383  | -0.1365 | -0.5325 | -0.3927 | -0.0066 | -0.0877 |
| 1  | 1.0008                    | -0.9160 | -0.8718 | 0.0993  | 0.1370  | 0.0304  | 0.0942   | 0.0864  | -0.0069 | 0.1993  | 0.0038  | 0.0782  |
| 1  | 1.0008                    | -0.9160 | 0.8718  | 0.0993  | 0.1370  | 0.0304  | 0.0942   | 0.0864  | -0.0069 | 0.1993  | 0.0038  | 0.0782  |
| 1  | 0.0345                    | 1.3988  | -0.8810 | 0.1256  | 0.1246  | 0.0401  | 0.0983   | 0.0954  | 0.2026  | 0.2076  | 0.0428  | 0.0948  |
| 1  | 0.0345                    | 1.3988  | 0.8810  | 0.1256  | 0.1246  | 0.0401  | 0.0983   | 0.0954  | 0.2026  | 0.2076  | 0.0428  | 0.0948  |
| 35 | -1.7727                   | -0.0535 | 0.0000  | -0.1430 | 0.2045  | -0.0943 | -0.0752  | -0.0887 | -0.1200 | -0.0314 | -0.1748 | -0.1435 |

Dipole moment (in D) 2.33 (DEN) 2.14 1.07 1.38 1.37 1.60 2.41 1.56 2.25 2.11

-----  
File TZVPMol595.out

Molecule PMol595 2-bromobutane

SP Mol595 B3LYP/Def2TZVP VAC.

0 14

Dipole -1.8793 1.2583 0.2956 2.2809  
 Quadrupole -0.3974 0.5251 -0.1276 -0.3557 -0.2237 0.6334

|   | Atomic coordinates (in A) |        |         | Mul.    | Lowdin  | Hirsch. | I-Hirsch | CM5     | ESP     | NPA     | AIM    | ACP     |
|---|---------------------------|--------|---------|---------|---------|---------|----------|---------|---------|---------|--------|---------|
| 6 | -0.1605                   | 2.1292 | -0.0146 | -0.3104 | -0.3092 | -0.0876 | -0.4374  | -0.2376 | -0.4206 | -0.6147 | 0.0273 | -0.2443 |



|    |         |         |         |         |         |         |         |         |         |         |         |         |
|----|---------|---------|---------|---------|---------|---------|---------|---------|---------|---------|---------|---------|
| 6  | -0.4772 | 0.7053  | 0.3669  | -0.0067 | -0.4421 | 0.0206  | 0.1157  | -0.0577 | 0.1239  | -0.1800 | 0.0160  | 0.0246  |
| 1  | 0.7264  | 2.5008  | 0.4927  | 0.1274  | 0.1226  | 0.0347  | 0.1180  | 0.0872  | 0.1251  | 0.2185  | 0.0197  | 0.0878  |
| 1  | 0.0024  | 2.2213  | -1.0878 | 0.1153  | 0.1238  | 0.0339  | 0.1184  | 0.0867  | 0.1176  | 0.2100  | 0.0153  | 0.0857  |
| 1  | -0.9987 | 2.7760  | 0.2522  | 0.1073  | 0.1245  | 0.0358  | 0.1192  | 0.0878  | 0.1211  | 0.2083  | 0.0047  | 0.0881  |
| 6  | -1.7059 | 0.1578  | -0.3290 | -0.1485 | -0.2994 | -0.0484 | -0.1994 | -0.1593 | 0.0783  | -0.4154 | 0.0609  | -0.1337 |
| 1  | -0.5816 | 0.6080  | 1.4478  | 0.1022  | 0.1409  | 0.0379  | 0.0798  | 0.0967  | 0.0815  | 0.2068  | 0.0368  | 0.0896  |
| 6  | -2.1290 | -1.2263 | 0.1149  | -0.3357 | -0.3113 | -0.0883 | -0.3486 | -0.2400 | -0.2509 | -0.5922 | 0.0118  | -0.2499 |
| 1  | -2.5138 | 0.8716  | -0.1345 | 0.0882  | 0.1420  | 0.0341  | 0.1021  | 0.0897  | 0.0154  | 0.2041  | -0.0040 | 0.0824  |
| 1  | -1.5427 | 0.1829  | -1.4095 | 0.0986  | 0.1385  | 0.0312  | 0.0982  | 0.0872  | 0.0263  | 0.2002  | 0.0048  | 0.0796  |
| 1  | -3.0502 | -1.5351 | -0.3757 | 0.1126  | 0.1186  | 0.0320  | 0.1087  | 0.0835  | 0.0720  | 0.2073  | -0.0006 | 0.0856  |
| 1  | -1.3652 | -1.9671 | -0.1162 | 0.1289  | 0.1187  | 0.0235  | 0.0961  | 0.0765  | 0.0622  | 0.2142  | 0.0170  | 0.0762  |
| 1  | -2.3029 | -1.2616 | 1.1911  | 0.0990  | 0.1179  | 0.0284  | 0.1013  | 0.0803  | 0.0554  | 0.1961  | -0.0073 | 0.0803  |
| 35 | 1.0989  | -0.4284 | -0.0311 | -0.1781 | 0.2145  | -0.0879 | -0.0722 | -0.0808 | -0.2073 | -0.0633 | -0.2014 | -0.1519 |

Dipole mement (in D) 2.28 (DEN) 2.23 1.15 1.16 1.09 1.41 2.39 1.69 2.15 2.06

-----  
File TZVPMol596.out

Molecule PMol596 1-bromopentane

SP Mol596 B3LYP/Def2TZVP VAC.

0 17

Dipole 1.5552 1.7706 0.0000 2.3566

Quadrupole 0.2247 -1.8241 1.5994 -2.0403 0.0000 0.0000

|    | Atomic coordinates (in A) |         |         | Mul.    | Lowdin  | Hirsch. | I-Hirsch | CM5     | ESP     | NPA     | AIM     | ACP     |
|----|---------------------------|---------|---------|---------|---------|---------|----------|---------|---------|---------|---------|---------|
| 6  | 0.0000                    | 0.6258  | 0.0000  | -0.1650 | -0.2999 | -0.0512 | -0.2045  | -0.1625 | 0.1276  | -0.4082 | 0.0610  | -0.1372 |
| 6  | 1.1982                    | 1.5637  | 0.0000  | -0.1954 | -0.2647 | -0.0443 | -0.1437  | -0.1556 | 0.0546  | -0.3748 | 0.0403  | -0.1401 |
| 1  | -0.6281                   | 0.8238  | 0.8718  | 0.1000  | 0.1373  | 0.0303  | 0.0922   | 0.0863  | 0.0004  | 0.1996  | 0.0038  | 0.0782  |
| 1  | -0.6281                   | 0.8238  | -0.8718 | 0.1000  | 0.1373  | 0.0303  | 0.0922   | 0.0863  | 0.0004  | 0.1996  | 0.0038  | 0.0782  |
| 6  | 0.8055                    | 3.0319  | 0.0000  | -0.1396 | -0.2911 | -0.0430 | -0.1206  | -0.1561 | 0.1328  | -0.3769 | 0.0566  | -0.1349 |
| 1  | 1.8282                    | 1.3555  | 0.8711  | 0.0852  | 0.1341  | 0.0269  | 0.0832   | 0.0827  | -0.0108 | 0.1868  | -0.0173 | 0.0742  |
| 1  | 1.8282                    | 1.3555  | -0.8711 | 0.0852  | 0.1341  | 0.0269  | 0.0832   | 0.0827  | -0.0108 | 0.1868  | -0.0173 | 0.0742  |
| 6  | 2.0009                    | 3.9639  | 0.0000  | -0.3267 | -0.3087 | -0.0835 | -0.3290  | -0.2354 | -0.2203 | -0.5836 | 0.0139  | -0.2472 |
| 1  | 0.1749                    | 3.2351  | -0.8701 | 0.0863  | 0.1328  | 0.0278  | 0.0833   | 0.0830  | -0.0269 | 0.1912  | -0.0147 | 0.0766  |
| 1  | 0.1749                    | 3.2351  | 0.8701  | 0.0863  | 0.1328  | 0.0278  | 0.0833   | 0.0830  | -0.0269 | 0.1912  | -0.0147 | 0.0766  |
| 1  | 1.7018                    | 5.0108  | 0.0000  | 0.1140  | 0.1174  | 0.0306  | 0.1012   | 0.0819  | 0.0599  | 0.2050  | -0.0024 | 0.0842  |
| 1  | 2.6290                    | 3.8046  | 0.8772  | 0.1025  | 0.1168  | 0.0278  | 0.0976   | 0.0796  | 0.0447  | 0.1956  | -0.0081 | 0.0800  |
| 1  | 2.6290                    | 3.8046  | -0.8772 | 0.1025  | 0.1168  | 0.0278  | 0.0976   | 0.0796  | 0.0447  | 0.1956  | -0.0081 | 0.0800  |
| 6  | 0.4262                    | -0.8205 | 0.0000  | -0.1437 | -0.4482 | -0.0192 | -0.1362  | -0.1364 | -0.3257 | -0.3916 | -0.0056 | -0.0877 |
| 1  | 1.0109                    | -1.0748 | -0.8810 | 0.1263  | 0.1246  | 0.0400  | 0.0983   | 0.0954  | 0.1516  | 0.2078  | 0.0427  | 0.0947  |
| 1  | 1.0109                    | -1.0748 | 0.8810  | 0.1263  | 0.1246  | 0.0400  | 0.0983   | 0.0954  | 0.1516  | 0.2078  | 0.0427  | 0.0947  |
| 35 | -1.0948                   | -2.0425 | 0.0000  | -0.1441 | 0.2040  | -0.0949 | -0.0761  | -0.0894 | -0.1470 | -0.0320 | -0.1757 | -0.1441 |

Dipole mement (in D) 2.36 (DEN) 2.11 0.88 1.43 1.35 1.66 2.46 1.61 2.30 2.14

-----  
File TZVPMol597.out

Molecule PMol597 1-bromoheptane

SP Mol597 B3LYP/Def2TZVP VAC.

0 23

Dipole 2.2968 0.7253 0.0002 2.4086

Quadrupole -6.4351 2.8729 3.5622 -1.5444 -0.0006 -0.0001

|    | Atomic coordinates (in A) |         |         | Mul.    | Lowdin  | Hirsch. | I-Hirsch | CM5     | ESP     | NPA     | AIM     | ACP     |
|----|---------------------------|---------|---------|---------|---------|---------|----------|---------|---------|---------|---------|---------|
| 6  | -1.7126                   | 0.7646  | 0.0000  | -0.1417 | -0.4480 | -0.0192 | -0.1362  | -0.1365 | -0.4972 | -0.3911 | -0.0055 | -0.0877 |
| 6  | -0.5480                   | -0.1934 | -0.0000 | -0.1668 | -0.2994 | -0.0513 | -0.2032  | -0.1626 | 0.3129  | -0.4074 | 0.0611  | -0.1372 |
| 1  | -1.7170                   | 1.4023  | 0.8810  | 0.1262  | 0.1246  | 0.0400  | 0.0982   | 0.0953  | 0.1922  | 0.2077  | 0.0427  | 0.0946  |
| 1  | -1.7169                   | 1.4024  | -0.8809 | 0.1262  | 0.1246  | 0.0400  | 0.0982   | 0.0953  | 0.1922  | 0.2077  | 0.0426  | 0.0946  |
| 6  | 0.7841                    | 0.5428  | 0.0001  | -0.1875 | -0.2622 | -0.0444 | -0.1445  | -0.1556 | 0.0650  | -0.3715 | 0.0401  | -0.1401 |
| 1  | -0.6117                   | -0.8489 | 0.8718  | 0.1006  | 0.1373  | 0.0301  | 0.0923   | 0.0862  | -0.0292 | 0.1999  | 0.0037  | 0.0780  |
| 1  | -0.6116                   | -0.8487 | -0.8720 | 0.1006  | 0.1373  | 0.0301  | 0.0923   | 0.0862  | -0.0292 | 0.1999  | 0.0037  | 0.0780  |
| 6  | 1.9818                    | -0.3915 | 0.0001  | -0.1622 | -0.2636 | -0.0450 | -0.1550  | -0.1565 | -0.0548 | -0.3694 | 0.0461  | -0.1400 |
| 1  | 0.8377                    | 1.2041  | -0.8711 | 0.0868  | 0.1344  | 0.0267  | 0.0811   | 0.0825  | -0.0243 | 0.1873  | -0.0173 | 0.0741  |
| 1  | 0.8377                    | 1.2040  | 0.8714  | 0.0868  | 0.1344  | 0.0267  | 0.0811   | 0.0825  | -0.0243 | 0.1873  | -0.0173 | 0.0741  |
| 1  | 1.9259                    | -1.0535 | 0.8706  | 0.0849  | 0.1348  | 0.0268  | 0.0815   | 0.0825  | -0.0120 | 0.1872  | -0.0173 | 0.0742  |
| 1  | 1.9259                    | -1.0533 | -0.8706 | 0.0849  | 0.1348  | 0.0268  | 0.0815   | 0.0825  | -0.0120 | 0.1872  | -0.0173 | 0.0742  |
| 6  | 3.3157                    | 0.3337  | 0.0002  | -0.1721 | -0.2676 | -0.0468 | -0.1529  | -0.1581 | 0.0756  | -0.3726 | 0.0448  | -0.1413 |
| 6  | 4.5158                    | -0.5982 | 0.0001  | -0.1355 | -0.2930 | -0.0451 | -0.1207  | -0.1582 | 0.2251  | -0.3775 | 0.0542  | -0.1364 |
| 1  | 3.3705                    | 0.9964  | 0.8708  | 0.0804  | 0.1332  | 0.0249  | 0.0800   | 0.0806  | -0.0235 | 0.1848  | -0.0208 | 0.0720  |
| 1  | 3.3705                    | 0.9965  | -0.8703 | 0.0804  | 0.1332  | 0.0249  | 0.0800   | 0.0806  | -0.0235 | 0.1848  | -0.0208 | 0.0720  |
| 6  | 5.8413                    | 0.1378  | 0.0002  | -0.3264 | -0.3101 | -0.0845 | -0.3274  | -0.2363 | -0.3429 | -0.5833 | 0.0136  | -0.2477 |
| 1  | 4.4583                    | -1.2591 | 0.8701  | 0.0824  | 0.1314  | 0.0257  | 0.0794   | 0.0808  | -0.0418 | 0.1891  | -0.0183 | 0.0742  |
| 1  | 4.4583                    | -1.2589 | -0.8700 | 0.0824  | 0.1314  | 0.0257  | 0.0794   | 0.0808  | -0.0418 | 0.1891  | -0.0183 | 0.0742  |
| 1  | 6.6896                    | -0.5451 | 0.0002  | 0.1120  | 0.1164  | 0.0291  | 0.0987   | 0.0804  | 0.0821  | 0.2033  | -0.0049 | 0.0825  |
| 1  | 5.9392                    | 0.7790  | -0.8768 | 0.1011  | 0.1163  | 0.0269  | 0.0962   | 0.0787  | 0.0717  | 0.1948  | -0.0094 | 0.0790  |
| 1  | 5.9391                    | 0.7789  | 0.8774  | 0.1011  | 0.1163  | 0.0269  | 0.0962   | 0.0787  | 0.0717  | 0.1948  | -0.0094 | 0.0790  |
| 35 | -3.4333                   | -0.1563 | -0.0002 | -0.1445 | 0.2034  | -0.0953 | -0.0767  | -0.0898 | -0.1319 | -0.0323 | -0.1760 | -0.1444 |

Dipole mement (in D) 2.41 (DEN) 2.12 0.83 1.48 1.40 1.71 2.51 1.65 2.36 2.19

-----

File TZVPMol598.out

Molecule PMol598 bromoethene

SP Mol598 B3LYP/Def2TZVP VAC.

0 6

Dipole 0.2398 -1.4030 0.0000 1.4233

Quadrupole 0.6722 2.4662 -3.1384 -0.5021 0.0000 0.0000

|    | Atomic coordinates (in A) |         |        | Mul.    | Lowdin  | Hirsch. | I-Hirsch | CM5     | ESP     | NPA     | AIM     | ACP     |
|----|---------------------------|---------|--------|---------|---------|---------|----------|---------|---------|---------|---------|---------|
| 6  | 0.4509                    | -1.1030 | 0.0000 | -0.0907 | -0.4553 | -0.0288 | -0.0606  | -0.1002 | -0.2198 | -0.2764 | -0.1039 | -0.0332 |
| 6  | -0.4369                   | -2.0802 | 0.0000 | -0.2592 | -0.2317 | -0.0794 | -0.3067  | -0.1821 | -0.2668 | -0.4006 | -0.0153 | -0.1761 |
| 1  | -0.1005                   | -3.1085 | 0.0000 | 0.1267  | 0.1296  | 0.0491  | 0.1339   | 0.1021  | 0.1550  | 0.2096  | 0.0533  | 0.0986  |
| 1  | 1.5194                    | -1.2654 | 0.0000 | 0.1429  | 0.1276  | 0.0533  | 0.1155   | 0.1089  | 0.2107  | 0.2112  | 0.0844  | 0.1040  |
| 35 | 0.0000                    | 0.7250  | 0.0000 | -0.0538 | 0.3055  | -0.0412 | -0.0136  | -0.0291 | -0.0502 | 0.0498  | -0.0786 | -0.0886 |
| 1  | -1.5031                   | -1.9033 | 0.0000 | 0.1341  | 0.1244  | 0.0471  | 0.1317   | 0.1006  | 0.1710  | 0.2063  | 0.0603  | 0.0953  |

Dipole mement (in D) 1.42 (DEN) 1.16 2.02 0.70 0.66 0.88 1.54 0.69 1.43 1.39

-----

File TZVPMol599.out  
Molecule PMol599 bromobenzene  
SP Mol599 B3LYP/Def2TZVP VAC.  
0 12

|                      |                           |         |         |         |         |         |          |         |         |         |         |         |
|----------------------|---------------------------|---------|---------|---------|---------|---------|----------|---------|---------|---------|---------|---------|
| Dipole               | 0.0000                    | 0.0000  | -1.7754 | 1.7754  |         |         |          |         |         |         |         |         |
| Quadrupole           | -5.4059                   | 3.1610  | 2.2448  | 0.0000  | 0.0000  | 0.0000  |          |         |         |         |         |         |
|                      | Atomic coordinates (in A) |         |         | Mul.    | Lowdin  | Hirsch. | I-Hirsch | CM5     | ESP     | NPA     | AIM     | ACP     |
| 6                    | 0.0000                    | 0.0000  | -0.0973 | 0.1010  | -0.3778 | 0.0050  | 0.1080   | -0.0166 | -0.0807 | -0.0856 | -0.0835 | 0.0582  |
| 6                    | 0.0000                    | 1.2086  | -0.7794 | -0.1526 | -0.1429 | -0.0428 | -0.1732  | -0.0969 | 0.0223  | -0.2305 | 0.0065  | -0.0829 |
| 6                    | 0.0000                    | -1.2086 | -0.7794 | -0.1526 | -0.1429 | -0.0428 | -0.1732  | -0.0969 | 0.0223  | -0.2305 | 0.0065  | -0.0829 |
| 6                    | 0.0000                    | 1.2004  | -2.1675 | -0.1007 | -0.1320 | -0.0322 | -0.0669  | -0.0881 | -0.1888 | -0.1901 | -0.0187 | -0.0769 |
| 6                    | 0.0000                    | -1.2004 | -2.1675 | -0.1007 | -0.1320 | -0.0322 | -0.0669  | -0.0881 | -0.1888 | -0.1901 | -0.0188 | -0.0769 |
| 6                    | 0.0000                    | 0.0000  | -2.8640 | -0.1086 | -0.1388 | -0.0380 | -0.1010  | -0.0941 | -0.0566 | -0.2109 | -0.0211 | -0.0830 |
| 1                    | 0.0000                    | 2.1409  | -0.2319 | 0.1268  | 0.1469  | 0.0446  | 0.1079   | 0.1017  | 0.0910  | 0.2203  | 0.0535  | 0.0880  |
| 1                    | 0.0000                    | -2.1409 | -0.2319 | 0.1268  | 0.1469  | 0.0446  | 0.1079   | 0.1017  | 0.0910  | 0.2203  | 0.0535  | 0.0880  |
| 1                    | 0.0000                    | 2.1409  | -2.7035 | 0.1159  | 0.1455  | 0.0457  | 0.1008   | 0.1018  | 0.1330  | 0.2130  | 0.0383  | 0.0903  |
| 1                    | 0.0000                    | -2.1409 | -2.7035 | 0.1159  | 0.1455  | 0.0457  | 0.1008   | 0.1018  | 0.1330  | 0.2130  | 0.0383  | 0.0903  |
| 1                    | 0.0000                    | 0.0000  | -3.9460 | 0.1150  | 0.1440  | 0.0439  | 0.0983   | 0.1000  | 0.1103  | 0.2120  | 0.0357  | 0.0884  |
| 35                   | 0.0000                    | 0.0000  | 1.7985  | -0.0860 | 0.3377  | -0.0415 | -0.0424  | -0.0265 | -0.0881 | 0.0589  | -0.0903 | -0.1007 |
| Dipole moment (in D) | 1.78 (DEN)                |         | 1.53    | 1.99    | 0.96    | 1.06    | 1.13     | 1.93    | 0.91    | 1.90    | 1.75    |         |

-----  
File TZVPMol600.out  
Molecule PMol600 bromoacetylene  
SP Mol600 B3LYP/Def2TZVP VAC.  
0 4

|                      |                           |         |         |         |         |         |          |         |         |         |         |         |
|----------------------|---------------------------|---------|---------|---------|---------|---------|----------|---------|---------|---------|---------|---------|
| Dipole               | 0.0000                    | 0.0000  | -0.1660 | 0.1660  |         |         |          |         |         |         |         |         |
| Quadrupole           | -2.6679                   | -2.6679 | 5.3357  | 0.0000  | 0.0000  | 0.0000  |          |         |         |         |         |         |
|                      | Atomic coordinates (in A) |         |         | Mul.    | Lowdin  | Hirsch. | I-Hirsch | CM5     | ESP     | NPA     | AIM     | ACP     |
| 1                    | 0.0000                    | 0.0000  | -3.3633 | 0.1913  | 0.1259  | 0.0917  | 0.2112   | 0.1457  | 0.2527  | 0.2383  | 0.1745  | 0.1387  |
| 6                    | 0.0000                    | 0.0000  | -2.3018 | -0.1031 | -0.1323 | -0.1002 | -0.2728  | -0.1525 | -0.2376 | -0.2307 | -0.0818 | -0.1520 |
| 6                    | 0.0000                    | 0.0000  | -1.1001 | -0.1997 | -0.4702 | -0.0768 | -0.0770  | -0.0982 | -0.1466 | -0.2251 | -0.2622 | -0.0343 |
| 35                   | 0.0000                    | 0.0000  | 0.6793  | 0.1114  | 0.4765  | 0.0853  | 0.1385   | 0.1050  | 0.1316  | 0.2175  | 0.1694  | 0.0476  |
| Dipole moment (in D) | 0.17 (DEN)                |         | 0.53    | 3.47    | 0.31    | 0.46    | 0.19     | 0.25    | 0.60    | 0.02    | 0.22    |         |

-----  
File TZVPMol601.out  
Molecule PMol601 3-bromopropyne  
SP Mol601 B3LYP/Def2TZVP VAC.  
0 7

|            |                           |         |         |         |         |         |          |         |         |         |         |         |
|------------|---------------------------|---------|---------|---------|---------|---------|----------|---------|---------|---------|---------|---------|
| Dipole     | 0.8209                    | -1.4489 | 0.0000  | 1.6653  |         |         |          |         |         |         |         |         |
| Quadrupole | 1.2977                    | 1.1181  | -2.4158 | 1.5130  | 0.0000  | 0.0000  |          |         |         |         |         |         |
|            | Atomic coordinates (in A) |         |         | Mul.    | Lowdin  | Hirsch. | I-Hirsch | CM5     | ESP     | NPA     | AIM     | ACP     |
| 6          | -0.9264                   | -2.6930 | 0.0000  | -0.0817 | -0.0745 | -0.0919 | -0.2878  | -0.1438 | -0.5443 | -0.1895 | -0.1217 | -0.1489 |
| 6          | -0.1279                   | -1.7969 | 0.0000  | -0.1034 | -0.1530 | -0.0489 | 0.0490   | -0.0608 | 0.3233  | -0.0448 | -0.1690 | -0.0199 |
| 1          | -1.6329                   | -3.4854 | 0.0000  | 0.1947  | 0.1280  | 0.0911  | 0.2095   | 0.1450  | 0.3327  | 0.2344  | 0.1707  | 0.1384  |

|    |        |         |         |         |         |         |         |         |         |         |         |         |
|----|--------|---------|---------|---------|---------|---------|---------|---------|---------|---------|---------|---------|
| 6  | 0.8364 | -0.7373 | 0.0000  | -0.2187 | -0.4224 | -0.0041 | -0.1992 | -0.1124 | -0.5390 | -0.4869 | 0.0690  | -0.0685 |
| 35 | 0.0000 | 1.0395  | 0.0000  | -0.1029 | 0.2311  | -0.0662 | -0.0364 | -0.0590 | -0.0675 | 0.0032  | -0.1229 | -0.1234 |
| 1  | 1.4701 | -0.7663 | 0.8827  | 0.1560  | 0.1454  | 0.0601  | 0.1324  | 0.1155  | 0.2473  | 0.2418  | 0.0868  | 0.1112  |
| 1  | 1.4701 | -0.7663 | -0.8827 | 0.1560  | 0.1454  | 0.0601  | 0.1324  | 0.1155  | 0.2473  | 0.2418  | 0.0868  | 0.1112  |

Dipole mement (in D) 1.67 (DEN) 2.21 1.73 0.87 0.95 1.07 1.83 1.23 1.55 1.67

-----  
File TZVPMol602.out  
Molecule PMol602 bromotrifluoromethane  
SP Mol602 B3LYP/Def2TZVP VAC.  
0 5

|            |         |         |         |        |        |        |  |  |  |  |  |  |
|------------|---------|---------|---------|--------|--------|--------|--|--|--|--|--|--|
| Dipole     | -0.4358 | -0.0004 | 0.0000  | 0.4358 |        |        |  |  |  |  |  |  |
| Quadrupole | 1.3763  | -0.6881 | -0.6883 | 0.0001 | 0.0000 | 0.0000 |  |  |  |  |  |  |

|    | Atomic coordinates (in A) |         |         | Mul.    | Lowdin  | Hirsch. | I-Hirsch | CM5     | ESP     | NPA     | AIM     | ACP     |
|----|---------------------------|---------|---------|---------|---------|---------|----------|---------|---------|---------|---------|---------|
| 35 | -1.1238                   | 0.0000  | 0.0000  | -0.0379 | 0.3154  | -0.0212 | -0.1385  | 0.0009  | 0.0003  | 0.0005  | -0.0033 | -0.0961 |
| 6  | 0.8161                    | -0.0001 | 0.0000  | 0.4540  | -0.9718 | 0.2860  | 0.9701   | 0.3320  | 0.1420  | 0.8887  | 1.9028  | 0.5614  |
| 9  | 1.2754                    | 1.2411  | 0.0000  | -0.1387 | 0.2188  | -0.0883 | -0.2772  | -0.1110 | -0.0472 | -0.2964 | -0.6330 | -0.1551 |
| 9  | 1.2754                    | -0.6206 | 1.0750  | -0.1387 | 0.2188  | -0.0883 | -0.2772  | -0.1110 | -0.0476 | -0.2964 | -0.6330 | -0.1551 |
| 9  | 1.2754                    | -0.6206 | -1.0750 | -0.1387 | 0.2188  | -0.0883 | -0.2772  | -0.1110 | -0.0476 | -0.2964 | -0.6330 | -0.1551 |

Dipole mement (in D) 0.44 (DEN) 0.57 1.49 0.39 0.54 0.74 0.32 1.97 4.16 0.13

-----  
File TZVPMol603.out  
Molecule PMol603 dibromodifluoromethane  
SP Mol603 B3LYP/Def2TZVP VAC.  
0 5

|            |        |         |         |        |        |        |  |  |  |  |  |  |
|------------|--------|---------|---------|--------|--------|--------|--|--|--|--|--|--|
| Dipole     | 0.0000 | 0.0000  | -0.4645 | 0.4645 |        |        |  |  |  |  |  |  |
| Quadrupole | 2.0445 | -1.5528 | -0.4917 | 0.0000 | 0.0000 | 0.0000 |  |  |  |  |  |  |

|    | Atomic coordinates (in A) |         |         | Mul.    | Lowdin  | Hirsch. | I-Hirsch | CM5     | ESP     | NPA     | AIM     | ACP     |
|----|---------------------------|---------|---------|---------|---------|---------|----------|---------|---------|---------|---------|---------|
| 6  | 0.0000                    | 0.0000  | 0.6593  | 0.3100  | -1.0361 | 0.2114  | 0.6559   | 0.2252  | -0.3704 | 0.5170  | 1.2687  | 0.4472  |
| 9  | 0.0000                    | 1.0729  | 1.4409  | -0.1259 | 0.2113  | -0.0845 | -0.2266  | -0.1103 | 0.0867  | -0.3024 | -0.6328 | -0.1398 |
| 9  | 0.0000                    | -1.0729 | 1.4409  | -0.1259 | 0.2113  | -0.0845 | -0.2266  | -0.1103 | 0.0867  | -0.3024 | -0.6328 | -0.1398 |
| 35 | 1.6144                    | 0.0000  | -0.4270 | -0.0291 | 0.3068  | -0.0213 | -0.1013  | -0.0024 | 0.0987  | 0.0439  | -0.0017 | -0.0838 |
| 35 | -1.6144                   | 0.0000  | -0.4270 | -0.0291 | 0.3068  | -0.0213 | -0.1013  | -0.0024 | 0.0984  | 0.0439  | -0.0017 | -0.0838 |

Dipole mement (in D) 0.46 (DEN) 0.64 1.61 0.41 0.64 0.80 0.38 2.73 4.73 0.17

-----  
File TZVPMol604.out  
Molecule PMol604 hydrogen\_iodide  
SP Mol604 B3LYP/Def2TZVP VAC.  
0 2

|            |         |         |         |        |        |        |  |  |  |  |  |  |
|------------|---------|---------|---------|--------|--------|--------|--|--|--|--|--|--|
| Dipole     | 0.0000  | 0.0000  | -0.4619 | 0.4619 |        |        |  |  |  |  |  |  |
| Quadrupole | -1.5942 | -1.5942 | 3.1884  | 0.0000 | 0.0000 | 0.0000 |  |  |  |  |  |  |

|    | Atomic coordinates (in A) |        |        | Mul.    | Lowdin  | Hirsch. | I-Hirsch | CM5     | ESP     | NPA     | AIM    | ACP     |
|----|---------------------------|--------|--------|---------|---------|---------|----------|---------|---------|---------|--------|---------|
| 53 | 0.0000                    | 0.0000 | 0.0299 | -0.1200 | -0.0164 | -0.0640 | -0.1147  | -0.0965 | -0.0962 | -0.0960 | 0.0780 | -0.0519 |

|                      |            |        |         |        |        |        |        |        |        |        |         |        |
|----------------------|------------|--------|---------|--------|--------|--------|--------|--------|--------|--------|---------|--------|
| 1                    | 0.0000     | 0.0000 | -1.5841 | 0.1200 | 0.0164 | 0.0640 | 0.1146 | 0.0965 | 0.0962 | 0.0960 | -0.0780 | 0.0519 |
| Dipole moment (in D) | 0.46 (DEN) |        | 0.93    | 0.13   | 0.50   | 0.89   | 0.75   | 0.75   | 0.75   | 0.74   | 0.60    | 0.40   |

-----  
File TZVPMol605.out

Molecule PMol605 iodine\_monofluoride  
SP Mol605 B3LYP/Def2TZVP VAC.

|                      |                           |         |         |         |         |         |          |         |         |         |         |         |
|----------------------|---------------------------|---------|---------|---------|---------|---------|----------|---------|---------|---------|---------|---------|
| 0                    | 2                         |         |         |         |         |         |          |         |         |         |         |         |
| Dipole               | 0.0000                    | 0.0000  | 2.0661  | 2.0661  |         |         |          |         |         |         |         |         |
| Quadrupole           | -0.2003                   | -0.2003 | 0.4006  | 0.0000  | 0.0000  | 0.0000  |          |         |         |         |         |         |
|                      | Atomic coordinates (in A) |         |         | Mul.    | Lowdin  | Hirsch. | I-Hirsch | CM5     | ESP     | NPA     | AIM     | ACP     |
| 53                   | 0.0000                    | 0.0000  | 0.2805  | 0.3584  | 0.3252  | 0.1853  | 0.2694   | 0.2290  | 0.1989  | 0.5146  | 0.5767  | 0.1673  |
| 9                    | 0.0000                    | 0.0000  | -1.6519 | -0.3584 | -0.3252 | -0.1854 | -0.2695  | -0.2292 | -0.1989 | -0.5146 | -0.5766 | -0.1673 |
| Dipole moment (in D) | 2.07 (DEN)                |         | 3.33    | 3.02    | 1.72    | 2.50    | 2.13     | 1.85    | 4.78    | 5.35    | 1.55    |         |

-----  
File TZVPMol606.out

Molecule PMol606 iodine\_monochloride  
SP Mol606 B3LYP/Def2TZVP VAC.

|                      |                           |         |         |         |         |         |          |         |         |         |         |         |
|----------------------|---------------------------|---------|---------|---------|---------|---------|----------|---------|---------|---------|---------|---------|
| 0                    | 2                         |         |         |         |         |         |          |         |         |         |         |         |
| Dipole               | 0.0000                    | 0.0000  | 1.1669  | 1.1669  |         |         |          |         |         |         |         |         |
| Quadrupole           | -1.2860                   | -1.2860 | 2.5719  | 0.0000  | 0.0000  | 0.0000  |          |         |         |         |         |         |
|                      | Atomic coordinates (in A) |         |         | Mul.    | Lowdin  | Hirsch. | I-Hirsch | CM5     | ESP     | NPA     | AIM     | ACP     |
| 53                   | 0.0000                    | 0.0000  | 0.5644  | 0.1886  | 0.0644  | 0.0813  | 0.1133   | 0.1058  | 0.0902  | 0.2285  | 0.3125  | 0.0737  |
| 17                   | 0.0000                    | 0.0000  | -1.7596 | -0.1886 | -0.0644 | -0.0814 | -0.1135  | -0.1059 | -0.0902 | -0.2285 | -0.3125 | -0.0737 |
| Dipole moment (in D) | 1.17 (DEN)                |         | 2.10    | 0.72    | 0.91    | 1.27    | 1.18     | 1.01    | 2.55    | 3.49    | 0.82    |         |

-----  
File TZVPMol607.out

Molecule PMol607 iodine\_monobromide  
SP Mol607 B3LYP/Def2TZVP VAC.

|                      |                           |         |         |         |         |         |          |         |         |         |         |         |
|----------------------|---------------------------|---------|---------|---------|---------|---------|----------|---------|---------|---------|---------|---------|
| 0                    | 2                         |         |         |         |         |         |          |         |         |         |         |         |
| Dipole               | 0.0000                    | 0.0000  | 0.7498  | 0.7498  |         |         |          |         |         |         |         |         |
| Quadrupole           | -1.9460                   | -1.9460 | 3.8921  | 0.0000  | 0.0000  | 0.0000  |          |         |         |         |         |         |
|                      | Atomic coordinates (in A) |         |         | Mul.    | Lowdin  | Hirsch. | I-Hirsch | CM5     | ESP     | NPA     | AIM     | ACP     |
| 53                   | 0.0000                    | 0.0000  | 0.9890  | 0.1218  | 0.0642  | 0.0411  | 0.0562   | 0.0515  | 0.0618  | 0.1321  | 0.1789  | 0.0478  |
| 35                   | 0.0000                    | 0.0000  | -1.4977 | -0.1218 | -0.0642 | -0.0411 | -0.0562  | -0.0515 | -0.0618 | -0.1321 | -0.1789 | -0.0477 |
| Dipole moment (in D) | 0.75 (DEN)                |         | 1.46    | 0.77    | 0.49    | 0.67    | 0.61     | 0.74    | 1.58    | 2.14    | 0.57    |         |

-----  
File TZVPMol608.out

Molecule PMol608 cyanic\_iodide  
SP Mol608 B3LYP/Def2TZVP VAC.

0 3

```

Dipole      0.0000   0.0000   3.8163   3.8163
Quadrupole  2.3832   2.3832  -4.7664   0.0000   0.0000   0.0000
  Atomic coordinates (in A)      Mul.      Lowdin      Hirsch.      I-Hirsch      CM5      ESP      NPA      AIM      ACP
53      0.0000   0.0000   0.5141   0.2611   0.5195   0.1717   0.1805   0.2084   0.1998   0.3228   0.4339   0.1608
6       0.0000   0.0000  -1.4706  -0.2231  -0.5551   0.0224   0.1475   0.1082   0.1040  -0.0199  0.6768   0.1851
7       0.0000   0.0000  -2.6316  -0.0381   0.0356  -0.1941  -0.3280  -0.3166  -0.3038  -0.3029  -1.1107  -0.3459

Dipole mement (in D)  3.82 (DEN)      2.70      4.75      2.72      3.55      3.75      3.60      4.77      10.33      3.46

```

```

-----
File TZVPMol609.out
Molecule PMol609      iodomethane
SP Mol609 B3LYP/Def2TZVP VAC.
0      5

```

```

Dipole      -0.0002  -0.0087   1.6844   1.6844
Quadrupole  -1.7503  -1.7501   3.5004   0.0001   0.0005  -0.0291
  Atomic coordinates (in A)      Mul.      Lowdin      Hirsch.      I-Hirsch      CM5      ESP      NPA      AIM      ACP
53      -0.0000   0.0018  -0.3262  -0.0469   0.2043  -0.0706   0.0003  -0.0563  -0.0484   0.0681   0.0192  -0.0955
6       0.0001  -0.0099   1.8066  -0.3925  -0.5250  -0.0665  -0.3977  -0.2336  -0.7657  -0.7180  -0.1912  -0.2135
1       0.8369  -0.6080   2.1459   0.1465   0.1069   0.0457   0.1325   0.0966   0.2717   0.2167   0.0573   0.1030
1      -0.9347  -0.4384   2.1467   0.1465   0.1069   0.0457   0.1325   0.0966   0.2711   0.2167   0.0573   0.1030
1       0.0979   1.0111   2.1547   0.1465   0.1069   0.0457   0.1325   0.0966   0.2713   0.2167   0.0573   0.1030

Dipole mement (in D)  1.68 (DEN)      1.20      1.57      0.95      0.65      1.05      1.84      0.37      0.09      1.49

```

```

-----
File TZVPMol610.out
Molecule PMol610      iodoacetylene
SP Mol610 B3LYP/Def2TZVP VAC.
0      4

```

```

Dipole      0.0000   0.0000   0.1509   0.1509
Quadrupole  -3.0943  -3.0943   6.1886   0.0000   0.0000   0.0000
  Atomic coordinates (in A)      Mul.      Lowdin      Hirsch.      I-Hirsch      CM5      ESP      NPA      AIM      ACP
53      0.0000   0.0000   0.5334   0.1980   0.4786   0.0953   0.1600   0.1282   0.1658   0.3123   0.3663   0.0795
6       0.0000   0.0000  -1.4443  -0.2284  -0.4650  -0.0909  -0.1182  -0.1249  -0.2304  -0.3246  -0.3874  -0.0697
6       0.0000   0.0000  -2.6490  -0.1597  -0.1387  -0.0955  -0.2492  -0.1482  -0.1650  -0.2253  -0.1510  -0.1476
1       0.0000   0.0000  -3.7113   0.1901   0.1251   0.0911   0.2074   0.1449   0.2296   0.2376   0.1722   0.1378

Dipole mement (in D)  0.15 (DEN)      0.74      3.99      0.47      0.70      0.50      0.03      1.68      2.48      0.11

```

```

-----
File TZVPMol611.out
Molecule PMol611      iodoethene
SP Mol611 B3LYP/Def2TZVP VAC.
0      6

```

```

Dipole      0.1490  -1.2456   0.0000   1.2545
Quadrupole  0.0503   3.6894  -3.7397  -0.6952   0.0000   0.0000
  Atomic coordinates (in A)      Mul.      Lowdin      Hirsch.      I-Hirsch      CM5      ESP      NPA      AIM      ACP

```

|    |         |         |        |         |         |         |         |         |         |         |         |         |
|----|---------|---------|--------|---------|---------|---------|---------|---------|---------|---------|---------|---------|
| 53 | 0.0000  | 0.5780  | 0.0000 | 0.0161  | 0.3102  | -0.0323 | 0.0049  | -0.0089 | -0.0243 | 0.1345  | 0.0995  | -0.0630 |
| 6  | 0.4577  | -1.4559 | 0.0000 | -0.1637 | -0.4526 | -0.0381 | -0.0921 | -0.1188 | -0.2801 | -0.3574 | -0.2675 | -0.0551 |
| 6  | -0.4407 | -2.4248 | 0.0000 | -0.2531 | -0.2367 | -0.0750 | -0.2867 | -0.1784 | -0.2044 | -0.3991 | -0.0201 | -0.1721 |
| 1  | -0.1180 | -3.4592 | 0.0000 | 0.1267  | 0.1286  | 0.0484  | 0.1307  | 0.1011  | 0.1387  | 0.2084  | 0.0514  | 0.0975  |
| 1  | -1.5069 | -2.2436 | 0.0000 | 0.1352  | 0.1236  | 0.0456  | 0.1269  | 0.0988  | 0.1512  | 0.2035  | 0.0560  | 0.0927  |
| 1  | 1.5225  | -1.6454 | 0.0000 | 0.1388  | 0.1270  | 0.0515  | 0.1164  | 0.1063  | 0.2190  | 0.2101  | 0.0806  | 0.1000  |

Dipole moment (in D) 1.25 (DEN) 0.54 2.37 0.66 0.53 0.71 1.41 0.20 0.48 1.22

-----  
File TZVPMol612.out

Molecule PMol612 iodoethane

SP Mol612 B3LYP/Def2TZVP VAC.

0 8

Dipole 0.3803 -1.9829 0.0000 2.0190

Quadrupole -1.2017 2.7007 -1.4990 -1.3165 0.0000 0.0000

|    | Atomic coordinates (in A) |         |         | Mul.    | Lowdin  | Hirsch. | I-Hirsch | CM5     | ESP     | NPA     | AIM     | ACP     |
|----|---------------------------|---------|---------|---------|---------|---------|----------|---------|---------|---------|---------|---------|
| 53 | 0.0000                    | 0.6389  | 0.0000  | -0.0801 | 0.2068  | -0.0822 | -0.0489  | -0.0662 | -0.1469 | 0.0331  | -0.0235 | -0.1174 |
| 6  | 0.6010                    | -1.4349 | 0.0000  | -0.2310 | -0.4762 | -0.0239 | -0.1279  | -0.1508 | -0.1803 | -0.4661 | -0.1409 | -0.0983 |
| 6  | -0.5731                   | -2.3771 | 0.0000  | -0.3144 | -0.3421 | -0.0834 | -0.3749  | -0.2357 | 0.0156  | -0.6223 | 0.0314  | -0.2391 |
| 1  | -0.2188                   | -3.4096 | 0.0000  | 0.1128  | 0.1236  | 0.0382  | 0.1188   | 0.0894  | 0.0283  | 0.2120  | 0.0096  | 0.0912  |
| 1  | -1.2005                   | -2.2421 | 0.8788  | 0.1230  | 0.1214  | 0.0345  | 0.1142   | 0.0865  | 0.0258  | 0.2108  | 0.0165  | 0.0863  |
| 1  | -1.2005                   | -2.2421 | -0.8788 | 0.1230  | 0.1214  | 0.0345  | 0.1142   | 0.0865  | 0.0258  | 0.2108  | 0.0165  | 0.0863  |
| 1  | 1.2262                    | -1.5474 | -0.8807 | 0.1334  | 0.1225  | 0.0412  | 0.1023   | 0.0952  | 0.1158  | 0.2109  | 0.0455  | 0.0956  |
| 1  | 1.2262                    | -1.5474 | 0.8807  | 0.1334  | 0.1225  | 0.0412  | 0.1023   | 0.0952  | 0.1158  | 0.2109  | 0.0454  | 0.0956  |

Dipole moment (in D) 2.02 (DEN) 1.56 1.46 1.14 1.01 1.24 2.18 0.75 0.67 1.77

-----  
File TZVPMol613.out

Molecule PMol613 iodopropane

SP Mol613 B3LYP/Def2TZVP VAC.

0 11

Dipole -0.2978 -2.1002 0.0000 2.1212

Quadrupole -0.7839 1.7562 -0.9723 0.7111 0.0000 0.0000

|    | Atomic coordinates (in A) |         |         | Mul.    | Lowdin  | Hirsch. | I-Hirsch | CM5     | ESP     | NPA     | AIM     | ACP     |
|----|---------------------------|---------|---------|---------|---------|---------|----------|---------|---------|---------|---------|---------|
| 6  | 0.0821                    | -3.4182 | 0.0000  | -0.3324 | -0.3041 | -0.0800 | -0.3266  | -0.2318 | -0.2742 | -0.5863 | 0.0091  | -0.2453 |
| 6  | 0.5609                    | -1.9755 | 0.0000  | -0.1575 | -0.3330 | -0.0477 | -0.1550  | -0.1615 | 0.4405  | -0.4172 | 0.0700  | -0.1317 |
| 1  | 0.9200                    | -4.1130 | 0.0000  | 0.1192  | 0.1212  | 0.0358  | 0.1103   | 0.0872  | 0.0535  | 0.2117  | 0.0072  | 0.0897  |
| 1  | -0.5252                   | -3.6371 | 0.8783  | 0.1071  | 0.1181  | 0.0306  | 0.1026   | 0.0824  | 0.0618  | 0.1981  | -0.0031 | 0.0830  |
| 1  | -0.5252                   | -3.6371 | -0.8783 | 0.1071  | 0.1181  | 0.0306  | 0.1026   | 0.0824  | 0.0618  | 0.1981  | -0.0031 | 0.0830  |
| 6  | -0.6071                   | -1.0171 | 0.0000  | -0.2382 | -0.4540 | -0.0272 | -0.1672  | -0.1524 | -0.4465 | -0.4676 | -0.1519 | -0.1046 |
| 1  | 1.1910                    | -1.7882 | 0.8711  | 0.1054  | 0.1353  | 0.0307  | 0.0916   | 0.0859  | -0.0575 | 0.1998  | 0.0047  | 0.0789  |
| 1  | 1.1910                    | -1.7882 | -0.8711 | 0.1054  | 0.1353  | 0.0307  | 0.0916   | 0.0859  | -0.0575 | 0.1998  | 0.0047  | 0.0789  |
| 1  | -1.2336                   | -1.1348 | -0.8809 | 0.1304  | 0.1241  | 0.0395  | 0.1025   | 0.0941  | 0.1722  | 0.2099  | 0.0420  | 0.0925  |
| 1  | -1.2336                   | -1.1348 | 0.8809  | 0.1304  | 0.1241  | 0.0395  | 0.1025   | 0.0941  | 0.1722  | 0.2099  | 0.0420  | 0.0925  |
| 53 | 0.0000                    | 1.0509  | 0.0000  | -0.0769 | 0.2149  | -0.0822 | -0.0546  | -0.0661 | -0.1262 | 0.0438  | -0.0216 | -0.1167 |

Dipole moment (in D) 2.12 (DEN) 1.62 1.30 1.26 1.11 1.37 2.27 0.78 0.79 1.87

-----

File TZVPMol614.out

Molecule PMol614 iodobenzene

SP Mol614 B3LYP/Def2TZVP VAC.

0 12

Dipole 0.0000 0.0000 -1.6475 1.6475

Quadrupole -6.3643 2.2018 4.1624 0.0000 0.0000 0.0000

|    | Atomic coordinates (in A) |         |         | Mul.    | Lowdin  | Hirsch. | I-Hirsch | CM5     | ESP     | NPA     | AIM     | ACP     |
|----|---------------------------|---------|---------|---------|---------|---------|----------|---------|---------|---------|---------|---------|
| 6  | 0.0000                    | 0.0000  | -3.3278 | -0.1152 | -0.1372 | -0.0367 | -0.0972  | -0.0928 | 0.0080  | -0.2085 | -0.0210 | -0.0815 |
| 6  | 0.0000                    | 1.1999  | -2.6308 | -0.0858 | -0.1327 | -0.0326 | -0.0716  | -0.0885 | -0.2591 | -0.1914 | -0.0200 | -0.0773 |
| 6  | 0.0000                    | 1.2074  | -1.2425 | -0.2065 | -0.1516 | -0.0412 | -0.1590  | -0.0962 | 0.1592  | -0.2383 | 0.0025  | -0.0821 |
| 6  | 0.0000                    | 0.0000  | -0.5542 | 0.1177  | -0.3622 | -0.0039 | 0.0793   | -0.0344 | -0.2661 | -0.1477 | -0.2385 | 0.0379  |
| 6  | 0.0000                    | -1.2074 | -1.2425 | -0.2065 | -0.1516 | -0.0412 | -0.1590  | -0.0962 | 0.1592  | -0.2383 | 0.0025  | -0.0821 |
| 6  | 0.0000                    | -1.1999 | -2.6308 | -0.0858 | -0.1327 | -0.0326 | -0.0716  | -0.0885 | -0.2591 | -0.1914 | -0.0200 | -0.0773 |
| 1  | 0.0000                    | 0.0000  | -4.4099 | 0.1152  | 0.1440  | 0.0441  | 0.0983   | 0.1002  | 0.0996  | 0.2120  | 0.0358  | 0.0887  |
| 1  | 0.0000                    | 2.1410  | -3.1660 | 0.1158  | 0.1455  | 0.0455  | 0.1005   | 0.1016  | 0.1399  | 0.2131  | 0.0379  | 0.0900  |
| 1  | 0.0000                    | 2.1446  | -0.7026 | 0.1293  | 0.1462  | 0.0427  | 0.1027   | 0.0996  | 0.0585  | 0.2180  | 0.0487  | 0.0848  |
| 1  | 0.0000                    | -2.1446 | -0.7026 | 0.1293  | 0.1462  | 0.0427  | 0.1027   | 0.0996  | 0.0585  | 0.2180  | 0.0487  | 0.0848  |
| 1  | 0.0000                    | -2.1410 | -3.1660 | 0.1158  | 0.1455  | 0.0455  | 0.1005   | 0.1016  | 0.1399  | 0.2131  | 0.0379  | 0.0900  |
| 53 | 0.0000                    | 0.0000  | 1.5456  | -0.0233 | 0.3404  | -0.0323 | -0.0256  | -0.0060 | -0.0386 | 0.1414  | 0.0856  | -0.0761 |

Dipole moment (in D) 1.65 (DEN) 0.85 2.38 0.93 0.97 0.97 1.82 0.01 0.16 1.62
