# Supplementary material for: A simple model for calculating atomic charges in molecules
Source: Royal Society of Chemistry journal article supplement (doi:10.1039/c8cp03764g), 2018-01-01
Supplement: c8cp03764g2.pdf [file c8cp03764g2.pdf]

## Supporting Information:

### **A simple model for calculating atomic charges in molecules**

*Alexander A. Voityuk\**<sup>1,2</sup> *Anton J. Stasyuk*<sup>2</sup> and *Sergei F. Vyboishchikov\**<sup>2,3</sup>

<sup>1</sup> Institució Catalana de Recerca i Estudis Avançats (ICREA), Passeig de Lluís Companys, 23, 08010

Barcelona, Spain

<sup>2</sup> Institut de Química Computacional i Catàlisi and Departament de Química, Universitat de Girona,

Carrer Maria Aurèlia Capmany, 17003 Girona, Spain.

<sup>3</sup> Peoples' Friendship University of Russia (RUDN University), 6 Miklukho-Maklay Street, 117198

Moscow, Russia

## Atomic charges in a.u.

Keywords:

File mol171.out

Molecule 171 LiF

SP Mol171 B3LYP/Def2TZVP VAC.

0 2

|                      |                    |         |         |         |         |         |          |         |         |         |         |         |
|----------------------|--------------------|---------|---------|---------|---------|---------|----------|---------|---------|---------|---------|---------|
| Dipole               | 0.0000             | 0.0000  | -6.0320 | 6.0320  |         |         |          |         |         |         |         |         |
| Quadrupole           | -1.9682            | -1.9682 | 3.9364  | 0.0000  | 0.0000  | 0.0000  |          |         |         |         |         |         |
|                      | Atomic coordinates |         |         | Mul.    | Lowdin  | Hirsch. | I-Hirsch | CM5     | ESP     | NPA     | AIM     | ACP     |
| 9                    | 0.0000             | 0.0000  | 0.3845  | -0.7486 | -0.6059 | -0.5793 | -0.9426  | -0.7334 | -0.8202 | -0.9463 | -0.9016 | -0.6696 |
| 3                    | 0.0000             | 0.0000  | -1.1534 | 0.7486  | 0.6059  | 0.5794  | 0.9427   | 0.7334  | 0.8202  | 0.9463  | 0.9016  | 0.6696  |
| Dipole moment (in D) | 6.03 (DEN)         |         | 5.53    | 4.48    | 4.28    | 6.96    | 5.42     | 6.06    | 6.99    | 6.66    | 4.95    |         |

-----  
File mol173.out

Molecule 173 LiS

SP Mol173 B3LYP/Def2TZVP VAC.

0 2

|                      |                    |         |         |         |         |         |          |         |         |         |         |         |
|----------------------|--------------------|---------|---------|---------|---------|---------|----------|---------|---------|---------|---------|---------|
| Dipole               | 0.0000             | 0.0000  | -6.8056 | 6.8056  |         |         |          |         |         |         |         |         |
| Quadrupole           | -6.0599            | -2.7003 | 8.7602  | 0.0000  | 0.0000  | 0.0000  |          |         |         |         |         |         |
|                      | Atomic coordinates |         |         | Mul.    | Lowdin  | Hirsch. | I-Hirsch | CM5     | ESP     | NPA     | AIM     | ACP     |
| 3                    | 0.0000             | 0.0000  | -1.7869 | 0.6526  | 0.3818  | 0.4678  | 0.8706   | 0.5647  | 0.6747  | 0.8692  | 0.8854  | 0.6657  |
| 16                   | 0.0000             | 0.0000  | 0.3350  | -0.6526 | -0.3818 | -0.4678 | -0.8706  | -0.5647 | -0.6747 | -0.8692 | -0.8854 | -0.6657 |
| Dipole moment (in D) | 6.81 (DEN)         |         | 6.65    | 3.89    | 4.77    | 8.87    | 5.76     | 6.88    | 8.86    | 9.02    | 6.78    |         |

-----  
File mol174.out

Molecule 174 LiCl

SP Mol174 B3LYP/Def2TZVP VAC.

0 2

|            |         |         |         |        |        |        |  |  |  |  |  |  |
|------------|---------|---------|---------|--------|--------|--------|--|--|--|--|--|--|
| Dipole     | 0.0000  | 0.0000  | -6.8593 | 6.8593 |        |        |  |  |  |  |  |  |
| Quadrupole | -4.4275 | -4.4275 | 8.8549  | 0.0000 | 0.0000 | 0.0000 |  |  |  |  |  |  |

|                      | Atomic coordinates |        |            | Mul.    | Lowdin  | Hirsch. | I-Hirsch | CM5     | ESP     | NPA     | AIM     | ACP     |
|----------------------|--------------------|--------|------------|---------|---------|---------|----------|---------|---------|---------|---------|---------|
| 17                   | 0.0000             | 0.0000 | 0.2998     | -0.6940 | -0.4337 | -0.5235 | -0.9139  | -0.6171 | -0.7256 | -0.9174 | -0.9005 | -0.6616 |
| 3                    | 0.0000             | 0.0000 | -1.6988    | 0.6940  | 0.4337  | 0.5236  | 0.9139   | 0.6171  | 0.7256  | 0.9174  | 0.9005  | 0.6616  |
| Dipole moment (in D) |                    |        | 6.86 (DEN) | 6.66    | 4.16    | 5.03    | 8.77     | 5.92    | 6.97    | 8.81    | 8.64    | 6.35    |

-----  
File mol175.out

Molecule 175 LiBr

SP Mol175 B3LYP/Def2TZVP VAC.

0 2

Dipole 0.0000 0.0000 -7.0857 7.0857

Quadrupole -6.0118 -6.0118 12.0235 0.0000 0.0000 0.0000

|                      | Atomic coordinates |        |            | Mul.    | Lowdin  | Hirsch. | I-Hirsch | CM5     | ESP     | NPA     | AIM     | ACP     |
|----------------------|--------------------|--------|------------|---------|---------|---------|----------|---------|---------|---------|---------|---------|
| 35                   | 0.0000             | 0.0000 | 0.1714     | -0.7036 | -0.4222 | -0.4985 | -0.8953  | -0.5640 | -0.7197 | -0.9063 | -0.9002 | -0.6552 |
| 3                    | 0.0000             | 0.0000 | -2.0001    | 0.7036  | 0.4222  | 0.4985  | 0.8953   | 0.5640  | 0.7197  | 0.9063  | 0.9002  | 0.6552  |
| Dipole moment (in D) |                    |        | 7.09 (DEN) | 7.34    | 4.40    | 5.20    | 9.34     | 5.88    | 7.51    | 9.45    | 9.39    | 6.83    |

-----  
File mol176.out

Molecule 176 LiI

SP Mol176 B3LYP/Def2TZVP VAC.

0 2

Dipole 0.0000 0.0000 -7.3360 7.3360

Quadrupole -7.6552 -7.6552 15.3105 0.0000 0.0000 0.0000

|                      | Atomic coordinates |        |            | Mul.    | Lowdin  | Hirsch. | I-Hirsch | CM5     | ESP     | NPA     | AIM     | ACP     |
|----------------------|--------------------|--------|------------|---------|---------|---------|----------|---------|---------|---------|---------|---------|
| 53                   | 0.0000             | 0.0000 | 0.1299     | -0.6768 | -0.3982 | -0.4844 | -0.8583  | -0.5237 | -0.6630 | -0.8794 | -0.8930 | -0.6263 |
| 3                    | 0.0000             | 0.0000 | -2.2957    | 0.6768  | 0.3982  | 0.4844  | 0.8583   | 0.5237  | 0.6630  | 0.8794  | 0.8930  | 0.6263  |
| Dipole moment (in D) |                    |        | 7.34 (DEN) | 7.89    | 4.64    | 5.64    | 10.00    | 6.10    | 7.72    | 10.25   | 10.40   | 7.30    |

-----  
File mol177.out

Molecule 177 LiOH

SP Mol177 B3LYP/Def2TZVP VAC.

0 3

Dipole 0.0000 0.0000 -4.1086 4.1086

Quadrupole -3.5328 -3.5328 7.0656 0.0000 0.0000 0.0000

|   | Atomic coordinates |        |         | Mul.    | Lowdin  | Hirsch. | I-Hirsch | CM5     | ESP     | NPA     | AIM     | ACP     |
|---|--------------------|--------|---------|---------|---------|---------|----------|---------|---------|---------|---------|---------|
| 3 | 0.0000             | 0.0000 | -1.2507 | 0.6971  | 0.5367  | 0.5091  | 1.0046   | 0.7125  | 0.8813  | 0.9520  | 0.8907  | 0.6227  |
| 8 | 0.0000             | 0.0000 | 0.3119  | -0.9726 | -0.6469 | -0.6028 | -1.4481  | -0.9801 | -1.4385 | -1.4035 | -1.4380 | -0.7979 |
| 1 | 0.0000             | 0.0000 | 1.2571  | 0.2755  | 0.1102  | 0.0937  | 0.4436   | 0.2676  | 0.5571  | 0.4515  | 0.5473  | 0.1752  |

Dipole moment (in D) 4.11 (DEN) 3.98 3.53 3.40 5.53 4.13 4.09 5.09 4.20 3.88

-----  
File mol178.out

Molecule 178 LiSH

SP Mol178 B3LYP/Def2TZVP VAC.

0 3

Dipole -0.4854 6.7189 0.0000 6.7364

Quadrupole -2.3789 8.8418 -6.4629 1.3129 0.0000 0.0000

|    | Atomic coordinates |         |        | Mul.    | Lowdin  | Hirsch. | I-Hirsch | CM5     | ESP     | NPA     | AIM     | ACP     |
|----|--------------------|---------|--------|---------|---------|---------|----------|---------|---------|---------|---------|---------|
| 3  | 0.0665             | 1.8049  | 0.0000 | 0.6484  | 0.4144  | 0.4797  | 0.8970   | 0.5777  | 0.6770  | 0.8860  | 0.8884  | 0.6882  |
| 16 | 0.0665             | -0.3105 | 0.0000 | -0.7598 | -0.4263 | -0.4875 | -1.0239  | -0.6516 | -0.7838 | -1.0089 | -0.7986 | -0.7572 |
| 1  | -1.2641            | -0.4464 | 0.0000 | 0.1114  | 0.0120  | 0.0078  | 0.1269   | 0.0739  | 0.1068  | 0.1229  | -0.0900 | 0.0690  |

Dipole moment (in D) 6.74 (DEN) 6.55 4.20 4.87 9.07 5.84 6.84 8.96 9.10 6.96

-----  
File mol179.out

Molecule 179 LiNH2

SP Mol179 B3LYP/Def2TZVP VAC.

0 4

Dipole 0.0000 -4.3874 0.0000 4.3874

Quadrupole -5.5834 6.8758 -1.2924 0.0001 0.0000 0.0000

|   | Atomic coordinates |        |        | Mul.    | Lowdin  | Hirsch. | I-Hirsch | CM5     | ESP     | NPA     | AIM     | ACP     |
|---|--------------------|--------|--------|---------|---------|---------|----------|---------|---------|---------|---------|---------|
| 7 | -0.0000            | 0.3208 | 0.0000 | -1.0516 | -0.7228 | -0.5433 | -1.5132  | -1.1370 | -1.8728 | -1.5885 | -1.4663 | -1.0213 |
| 1 | 0.0000             | 0.9505 | 0.7931 | 0.1857  | 0.1054  | 0.0335  | 0.2907   | 0.2166  | 0.4887  | 0.3305  | 0.2882  | 0.1622  |

|                      |         |            |         |        |        |        |        |        |        |        |        |        |
|----------------------|---------|------------|---------|--------|--------|--------|--------|--------|--------|--------|--------|--------|
| 1                    | 0.0000  | 0.9505     | -0.7931 | 0.1857 | 0.1054 | 0.0335 | 0.2907 | 0.2166 | 0.4887 | 0.3305 | 0.2882 | 0.1622 |
| 3                    | -0.0000 | -1.3823    | 0.0000  | 0.6802 | 0.5120 | 0.4763 | 0.9318 | 0.7039 | 0.8954 | 0.9274 | 0.8899 | 0.6970 |
| Dipole moment (in D) |         | 4.39 (DEN) | 4.44    | 3.55   | 3.69   | 5.86   | 4.45   | 4.37   | 5.59   | 5.54   | 4.72   |        |

-----  
File mol180.out

Molecule 180 LiCH3

SP Mol180 B3LYP/Def2TZVP VAC.

0 5

Dipole 0.0005 -5.5158 0.0000 5.5158

Quadrupole -3.3257 6.6514 -3.3258 -0.0006 0.0000 0.0000

|   | Atomic coordinates |         |         | Mul.    | Lowdin  | Hirsch. | I-Hirsch | CM5     | ESP     | NPA     | AIM     | ACP     |
|---|--------------------|---------|---------|---------|---------|---------|----------|---------|---------|---------|---------|---------|
| 6 | -0.0000            | 0.3690  | 0.0000  | -1.0335 | -0.8202 | -0.4131 | -1.2522  | -0.6143 | -1.6489 | -1.4301 | -0.7181 | -0.6889 |
| 1 | -1.0021            | 0.8182  | 0.0000  | 0.1019  | 0.0864  | -0.0250 | 0.1176   | 0.0224  | 0.2826  | 0.1903  | -0.0565 | 0.0086  |
| 1 | 0.5012             | 0.8178  | 0.8679  | 0.1019  | 0.0864  | -0.0250 | 0.1176   | 0.0224  | 0.2894  | 0.1903  | -0.0565 | 0.0086  |
| 1 | 0.5012             | 0.8178  | -0.8679 | 0.1019  | 0.0864  | -0.0250 | 0.1176   | 0.0224  | 0.2894  | 0.1903  | -0.0565 | 0.0086  |
| 3 | -0.0000            | -1.5560 | 0.0000  | 0.7278  | 0.5612  | 0.4880  | 0.8995   | 0.5472  | 0.7875  | 0.8591  | 0.8876  | 0.6630  |

|                      |  |            |      |      |      |      |      |      |      |      |      |  |
|----------------------|--|------------|------|------|------|------|------|------|------|------|------|--|
| Dipole moment (in D) |  | 5.52 (DEN) | 6.07 | 4.63 | 4.67 | 7.56 | 4.91 | 5.42 | 6.71 | 8.57 | 6.07 |  |
|----------------------|--|------------|------|------|------|------|------|------|------|------|------|--|

-----  
File mol181.out

Molecule 181 LiCH3O

SP Mol181 B3LYP/Def2TZVP VAC.

0 6

Dipole -3.3690 1.2242 0.0000 3.5845

Quadrupole -2.5637 5.0621 -2.4984 -5.1102 -0.0002 0.0000

|   | Atomic coordinates |         |         | Mul.    | Lowdin  | Hirsch. | I-Hirsch | CM5     | ESP     | NPA     | AIM     | ACP     |
|---|--------------------|---------|---------|---------|---------|---------|----------|---------|---------|---------|---------|---------|
| 3 | -0.6331            | 1.3682  | 0.0000  | 0.7189  | 0.5075  | 0.4304  | 0.9700   | 0.6246  | 0.7851  | 0.8878  | 0.8879  | 0.6154  |
| 6 | 0.8197             | 0.1315  | 0.0000  | -0.6030 | -0.6474 | -0.2752 | -0.7939  | -0.4200 | -1.4886 | -0.7378 | -0.1964 | -0.4321 |
| 8 | -0.6176            | -0.3706 | -0.0000 | -0.5846 | -0.1709 | -0.2784 | -0.8386  | -0.6152 | -0.5111 | -0.8902 | -1.1730 | -0.4829 |
| 1 | -0.6884            | -1.3236 | -0.0000 | 0.3078  | 0.1565  | 0.1582  | 0.4678   | 0.3314  | 0.4288  | 0.4716  | 0.5689  | 0.2611  |
| 1 | 1.3050             | -0.3027 | -0.8805 | 0.0804  | 0.0771  | -0.0175 | 0.0973   | 0.0396  | 0.3929  | 0.1343  | -0.0438 | 0.0193  |
| 1 | 1.3050             | -0.3027 | 0.8805  | 0.0804  | 0.0771  | -0.0175 | 0.0973   | 0.0396  | 0.3929  | 0.1343  | -0.0438 | 0.0193  |

Dipole moment (in D) 3.58 (DEN) 4.27 3.73 3.19 5.68 3.57 3.46 4.56 4.94 4.01

-----  
File mol182.out

Molecule 182 LiOCH3

SP Mol182 B3LYP/Def2TZVP VAC.

0 6

Dipole 0.0008 5.0398 0.0000 5.0398

Quadrupole -5.0614 10.1226 -5.0612 0.0019 0.0000 0.0000

|   | Atomic coordinates |         |         | Mul.    | Lowdin  | Hirsch. | I-Hirsch | CM5     | ESP     | NPA     | AIM     | ACP     |
|---|--------------------|---------|---------|---------|---------|---------|----------|---------|---------|---------|---------|---------|
| 3 | 0.0002             | 2.0129  | 0.0000  | 0.7015  | 0.5517  | 0.5283  | 0.9725   | 0.7329  | 0.7973  | 0.9423  | 0.8851  | 0.6372  |
| 8 | 0.0000             | 0.4417  | 0.0000  | -0.8166 | -0.3235 | -0.4905 | -1.1985  | -0.7482 | -1.0256 | -1.1104 | -1.3862 | -0.6491 |
| 6 | -0.0001            | -0.9188 | 0.0000  | -0.0654 | -0.4732 | -0.0392 | 0.1712   | -0.1573 | 0.4448  | -0.2041 | 0.6369  | -0.1164 |
| 1 | -0.5078            | -1.3530 | 0.8795  | 0.0602  | 0.0817  | 0.0005  | 0.0183   | 0.0575  | -0.0728 | 0.1241  | -0.0453 | 0.0428  |
| 1 | -0.5078            | -1.3530 | -0.8795 | 0.0602  | 0.0817  | 0.0005  | 0.0183   | 0.0575  | -0.0728 | 0.1241  | -0.0453 | 0.0428  |
| 1 | 1.0155             | -1.3531 | 0.0000  | 0.0602  | 0.0817  | 0.0005  | 0.0183   | 0.0575  | -0.0710 | 0.1241  | -0.0453 | 0.0428  |

Dipole moment (in D) 5.04 (DEN) 4.16 5.14 4.23 5.75 5.07 4.98 5.24 3.69 4.46

-----  
File mol183.out

Molecule 183 LiC2H

SP Mol183 B3LYP/Def2TZVP VAC.

0 4

Dipole 0.0000 0.0000 -5.9091 5.9091

Quadrupole -7.4084 -7.4084 14.8167 0.0000 0.0000 0.0000

|   | Atomic coordinates |        |         | Mul.    | Lowdin  | Hirsch. | I-Hirsch | CM5     | ESP     | NPA     | AIM     | ACP     |
|---|--------------------|--------|---------|---------|---------|---------|----------|---------|---------|---------|---------|---------|
| 6 | 0.0000             | 0.0000 | -0.2512 | -0.4708 | -0.4232 | -0.4078 | -1.0371  | -0.4798 | -0.9912 | -0.7503 | -0.5280 | -0.5391 |
| 6 | 0.0000             | 0.0000 | 0.9723  | -0.4848 | -0.2509 | -0.1792 | -0.0683  | -0.2331 | 0.0015  | -0.3855 | -0.5011 | -0.2266 |
| 3 | 0.0000             | 0.0000 | -2.1218 | 0.8123  | 0.5684  | 0.5286  | 0.9520   | 0.6015  | 0.8379  | 0.9329  | 0.9140  | 0.6644  |
| 1 | 0.0000             | 0.0000 | 2.0388  | 0.1433  | 0.1056  | 0.0583  | 0.1534   | 0.1114  | 0.1518  | 0.2029  | 0.1150  | 0.1013  |

Dipole moment (in D) 5.91 (DEN) 8.57 5.42 5.16 7.27 5.55 5.85 8.42 9.89 6.19

-----  
File mol185.out

Molecule 185 LiC3H5

SP Mol185 B3LYP/Def2TZVP VAC.

0 9

Dipole 0.1633 3.5699 0.0000 3.5736

Quadrupole 0.3797 5.0405 -5.4202 2.0662 0.0000 0.0000

|   | Atomic coordinates |         |         | Mul.    | Lowdin  | Hirsch. | I-Hirsch | CM5     | ESP     | NPA     | AIM     | ACP     |
|---|--------------------|---------|---------|---------|---------|---------|----------|---------|---------|---------|---------|---------|
| 6 | 0.1428             | -0.0773 | 1.2441  | -0.6357 | -0.4175 | -0.2212 | -0.7937  | -0.3668 | -1.3744 | -0.8304 | -0.3748 | -0.3931 |
| 6 | -0.4034            | -0.3894 | 0.0000  | -0.0241 | -0.3001 | -0.0607 | 0.0413   | -0.1704 | 0.8135  | -0.2332 | -0.1064 | -0.1210 |
| 6 | 0.1428             | -0.0773 | -1.2441 | -0.6357 | -0.4175 | -0.2212 | -0.7937  | -0.3668 | -1.3744 | -0.8304 | -0.3749 | -0.3931 |
| 1 | -0.3649            | -0.3610 | -2.1534 | 0.1053  | 0.1142  | 0.0144  | 0.1386   | 0.0672  | 0.3163  | 0.2099  | 0.0095  | 0.0553  |
| 1 | 1.2267             | 0.0136  | -1.3307 | 0.1411  | 0.1249  | 0.0142  | 0.1098   | 0.0671  | 0.3359  | 0.1839  | -0.0265 | 0.0404  |
| 1 | -1.4454            | -0.7087 | 0.0000  | 0.0911  | 0.1505  | 0.0404  | 0.1102   | 0.0961  | -0.0424 | 0.1994  | 0.0138  | 0.0773  |
| 1 | -0.3649            | -0.3610 | 2.1534  | 0.1053  | 0.1142  | 0.0144  | 0.1386   | 0.0672  | 0.3163  | 0.2099  | 0.0095  | 0.0553  |
| 1 | 1.2267             | 0.0136  | 1.3307  | 0.1411  | 0.1249  | 0.0142  | 0.1098   | 0.0671  | 0.3359  | 0.1839  | -0.0265 | 0.0404  |
| 3 | 0.1428             | 1.5557  | 0.0000  | 0.7116  | 0.5064  | 0.4056  | 0.9392   | 0.5393  | 0.6734  | 0.9070  | 0.8765  | 0.6383  |

Dipole moment (in D) 3.57 (DEN) 5.19 3.78 3.12 6.71 4.07 3.62 6.45 6.94 4.84

-----  
File mol186.out

Molecule 186 LiC2H2F

SP Mol186 B3LYP/Def2TZVP VAC.

0 6

Dipole -3.5323 2.3485 0.0013 4.2418

Quadrupole 7.1852 -2.1887 -4.9965 -7.6466 -0.0014 0.0014

|   | Atomic coordinates |         |         | Mul.    | Lowdin  | Hirsch. | I-Hirsch | CM5     | ESP     | NPA     | AIM     | ACP     |
|---|--------------------|---------|---------|---------|---------|---------|----------|---------|---------|---------|---------|---------|
| 6 | 0.2159             | 0.5484  | -0.0002 | -0.2419 | -0.3150 | -0.1753 | -0.4997  | -0.2417 | -0.6910 | -0.1801 | -0.2212 | -0.2402 |
| 6 | 1.3818             | -0.0609 | 0.0001  | -0.3463 | -0.2949 | -0.1275 | -0.2738  | -0.2261 | 0.0111  | -0.5893 | -0.1015 | -0.2300 |
| 3 | -1.6091            | 1.0143  | 0.0002  | 0.7851  | 0.5407  | 0.4837  | 0.9368   | 0.6462  | 0.7581  | 0.9266  | 0.9077  | 0.6468  |
| 9 | -0.9498            | -0.6005 | -0.0000 | -0.4228 | -0.1831 | -0.2635 | -0.4423  | -0.3678 | -0.2778 | -0.5832 | -0.6848 | -0.3430 |
| 1 | 1.5274             | -1.1333 | 0.0002  | 0.1152  | 0.1215  | 0.0431  | 0.1441   | 0.0967  | 0.1062  | 0.2111  | 0.0582  | 0.0835  |
| 1 | 2.2624             | 0.5696  | 0.0001  | 0.1106  | 0.1309  | 0.0394  | 0.1349   | 0.0927  | 0.0935  | 0.2150  | 0.0418  | 0.0829  |

Dipole moment (in D) 4.24 (DEN) 6.25 3.93 3.81 6.55 4.75 4.16 7.12 6.87 4.99

-----  
File mol188.out

Molecule 188 LiC2H6N

SP Mol188 B3LYP/Def2TZVP VAC.

0 10

Dipole -0.0001 5.4372 0.0000 5.4372

Quadrupole -4.7788 11.0431 -6.2643 -0.0002 0.0000 0.0000

|   | Atomic coordinates |         |         | Mul.    | Lowdin  | Hirsch. | I-Hirsch | CM5     | ESP     | NPA     | AIM     | ACP     |
|---|--------------------|---------|---------|---------|---------|---------|----------|---------|---------|---------|---------|---------|
| 3 | -0.0000            | 2.1218  | -0.0000 | 0.6824  | 0.5390  | 0.4943  | 0.9166   | 0.7296  | 0.7874  | 0.9188  | 0.8834  | 0.7090  |
| 7 | -0.0000            | 0.4062  | -0.0000 | -0.7492 | -0.2701 | -0.3756 | -1.1500  | -0.7865 | -0.9590 | -1.0026 | -1.3297 | -0.7479 |
| 6 | -1.1665            | -0.4284 | 0.0000  | -0.1681 | -0.4096 | -0.0698 | 0.0287   | -0.1583 | -0.0239 | -0.3981 | 0.3658  | -0.1392 |
| 6 | 1.1665             | -0.4284 | 0.0000  | -0.1681 | -0.4096 | -0.0698 | 0.0287   | -0.1583 | -0.0348 | -0.3981 | 0.3660  | -0.1392 |
| 1 | 1.2284             | -1.0988 | -0.8790 | 0.0720  | 0.0893  | -0.0000 | 0.0286   | 0.0583  | 0.0497  | 0.1402  | -0.0447 | 0.0503  |
| 1 | 1.2284             | -1.0987 | 0.8790  | 0.0720  | 0.0893  | -0.0000 | 0.0286   | 0.0583  | 0.0497  | 0.1402  | -0.0447 | 0.0503  |
| 1 | 2.0892             | 0.1636  | -0.0000 | 0.0574  | 0.0965  | 0.0106  | 0.0309   | 0.0703  | 0.0204  | 0.1595  | -0.0533 | 0.0581  |
| 1 | -1.2284            | -1.0988 | -0.8790 | 0.0720  | 0.0893  | -0.0000 | 0.0286   | 0.0583  | 0.0454  | 0.1402  | -0.0447 | 0.0503  |
| 1 | -2.0892            | 0.1636  | -0.0000 | 0.0574  | 0.0965  | 0.0106  | 0.0309   | 0.0703  | 0.0198  | 0.1595  | -0.0533 | 0.0581  |
| 1 | -1.2284            | -1.0988 | 0.8790  | 0.0720  | 0.0893  | -0.0000 | 0.0286   | 0.0583  | 0.0454  | 0.1402  | -0.0447 | 0.0503  |

Dipole moment (in D) 5.44 (DEN) 4.75 4.92 4.61 6.42 5.43 5.30 6.34 5.76 5.37

-----  
File Lix\_9.out

Molecule \_9 (CH3)HNLi

SP Lix\_9 B3LYP/Def2TZVP VAC.

0 7

Dipole 4.5444 -1.8936 -0.0007 4.9231

Quadrupole 8.0511 -1.3505 -6.7006 -4.7098 -0.0007 -0.0008

|   | Atomic coordinates |         |         | Mul.    | Lowdin  | Hirsch. | I-Hirsch | CM5     | ESP     | NPA     | AIM     | ACP     |
|---|--------------------|---------|---------|---------|---------|---------|----------|---------|---------|---------|---------|---------|
| 7 | 0.4530             | 0.3134  | 0.0001  | -0.9007 | -0.4734 | -0.4563 | -1.3220  | -0.9417 | -1.6570 | -1.2885 | -1.3857 | -0.8852 |
| 6 | -0.9204            | -0.1598 | -0.0000 | -0.1515 | -0.4355 | -0.0741 | 0.0500   | -0.1670 | 0.7977  | -0.3841 | 0.3641  | -0.1370 |
| 3 | 1.9597             | -0.5387 | -0.0001 | 0.6696  | 0.5229  | 0.4825  | 0.9137   | 0.7007  | 0.8415  | 0.9172  | 0.8846  | 0.6967  |
| 1 | 0.4271             | 1.3290  | -0.0002 | 0.1736  | 0.1219  | 0.0413  | 0.2724   | 0.2279  | 0.4538  | 0.3197  | 0.2764  | 0.1629  |



|   |         |         |         |        |        |         |        |        |         |        |         |        |
|---|---------|---------|---------|--------|--------|---------|--------|--------|---------|--------|---------|--------|
| 1 | -1.5048 | 0.1548  | 0.8819  | 0.0760 | 0.0855 | -0.0009 | 0.0273 | 0.0562 | -0.1552 | 0.1424 | -0.0448 | 0.0524 |
| 1 | -0.9450 | -1.2569 | 0.0003  | 0.0571 | 0.0932 | 0.0083  | 0.0314 | 0.0677 | -0.1255 | 0.1510 | -0.0496 | 0.0579 |
| 1 | -1.5045 | 0.1542  | -0.8823 | 0.0760 | 0.0855 | -0.0009 | 0.0273 | 0.0562 | -0.1553 | 0.1424 | -0.0448 | 0.0524 |

Dipole moment (in D) 4.92 (DEN) 4.53 4.62 4.27 6.20 5.03 4.90 6.06 5.79 5.08

-----  
File Lix\_10.out

Molecule\_10 (CH3)2NLi

SP Lix\_10 B3LYP/Def2TZVP VAC.

0 10

Dipole 0.0070 5.4907 0.0000 5.4907

Quadrupole -6.3651 11.2374 -4.8723 0.0181 0.0000 0.0000

|   | Atomic coordinates |         |         | Mul.    | Lowdin  | Hirsch. | I-Hirsch | CM5     | ESP     | NPA     | AIM     | ACP     |
|---|--------------------|---------|---------|---------|---------|---------|----------|---------|---------|---------|---------|---------|
| 7 | -0.0002            | 0.3998  | 0.0000  | -0.7539 | -0.2779 | -0.3756 | -1.1471  | -0.7709 | -1.0212 | -1.0025 | -1.3221 | -0.7468 |
| 3 | 0.0018             | 2.1394  | 0.0000  | 0.6803  | 0.5414  | 0.4938  | 0.9128   | 0.7154  | 0.7941  | 0.9171  | 0.8838  | 0.7065  |
| 6 | -0.0002            | -0.4312 | 1.1788  | -0.1653 | -0.4065 | -0.0703 | 0.0262   | -0.1593 | 0.0507  | -0.3991 | 0.3568  | -0.1394 |
| 6 | -0.0002            | -0.4312 | -1.1788 | -0.1653 | -0.4065 | -0.0703 | 0.0262   | -0.1593 | 0.0507  | -0.3991 | 0.3567  | -0.1394 |
| 1 | 0.8821             | -1.0981 | 1.2392  | 0.0723  | 0.0892  | 0.0002  | 0.0295   | 0.0583  | 0.0298  | 0.1409  | -0.0431 | 0.0506  |
| 1 | -0.8830            | -1.0974 | 1.2398  | 0.0723  | 0.0892  | 0.0002  | 0.0295   | 0.0583  | 0.0305  | 0.1409  | -0.0431 | 0.0506  |
| 1 | 0.0003             | 0.1746  | 2.0936  | 0.0575  | 0.0965  | 0.0109  | 0.0320   | 0.0705  | 0.0025  | 0.1599  | -0.0513 | 0.0584  |
| 1 | 0.8821             | -1.0981 | -1.2392 | 0.0723  | 0.0892  | 0.0002  | 0.0295   | 0.0583  | 0.0298  | 0.1409  | -0.0431 | 0.0506  |
| 1 | -0.8830            | -1.0974 | -1.2398 | 0.0723  | 0.0892  | 0.0002  | 0.0295   | 0.0583  | 0.0305  | 0.1409  | -0.0431 | 0.0506  |
| 1 | 0.0003             | 0.1746  | -2.0936 | 0.0575  | 0.0965  | 0.0109  | 0.0320   | 0.0705  | 0.0025  | 0.1599  | -0.0513 | 0.0584  |

Dipole moment (in D) 5.49 (DEN) 4.80 4.99 4.66 6.50 5.42 5.36 6.45 5.89 5.43

-----  
File Lix\_11.out

Molecule\_11 CH3-OLi

SP Lix\_11 B3LYP/Def2TZVP VAC.

0 6

Dipole -0.0180 4.9815 0.0000 4.9815

Quadrupole -5.1054 10.2106 -5.1052 -0.0445 0.0000 0.0000

|  | Atomic coordinates |  |  | Mul. | Lowdin | Hirsch. | I-Hirsch | CM5 | ESP | NPA | AIM | ACP |
|--|--------------------|--|--|------|--------|---------|----------|-----|-----|-----|-----|-----|
|--|--------------------|--|--|------|--------|---------|----------|-----|-----|-----|-----|-----|

|   |         |         |         |         |         |         |         |         |         |         |         |         |
|---|---------|---------|---------|---------|---------|---------|---------|---------|---------|---------|---------|---------|
| 8 | 0.0000  | 0.4459  | 0.0000  | -0.8215 | -0.3398 | -0.4948 | -1.2021 | -0.7488 | -1.0129 | -1.1168 | -1.3713 | -0.6497 |
| 6 | 0.0016  | -0.9301 | 0.0000  | -0.0670 | -0.4587 | -0.0386 | 0.1611  | -0.1578 | 0.3993  | -0.2077 | 0.6085  | -0.1201 |
| 1 | 0.5120  | -1.3504 | 0.8833  | 0.0631  | 0.0827  | 0.0025  | 0.0232  | 0.0596  | -0.0591 | 0.1274  | -0.0408 | 0.0452  |
| 1 | 0.5120  | -1.3504 | -0.8833 | 0.0631  | 0.0827  | 0.0025  | 0.0232  | 0.0596  | -0.0591 | 0.1274  | -0.0408 | 0.0452  |
| 1 | -1.0178 | -1.3521 | 0.0000  | 0.0630  | 0.0826  | 0.0025  | 0.0231  | 0.0596  | -0.0612 | 0.1274  | -0.0408 | 0.0451  |
| 3 | -0.0053 | 2.0221  | 0.0000  | 0.6994  | 0.5505  | 0.5259  | 0.9716  | 0.7278  | 0.7929  | 0.9423  | 0.8849  | 0.6344  |

Dipole moment (in D) 4.98 (DEN) 4.11 5.06 4.17 5.69 5.01 4.91 5.21 3.73 4.43

-----  
File Lix\_16.out

Molecule\_16 LiS  
SP Lix\_16 B3LYP/Def2TZVP VAC.  
0 2

|            |                    |         |         |         |         |         |          |         |         |         |         |         |
|------------|--------------------|---------|---------|---------|---------|---------|----------|---------|---------|---------|---------|---------|
| Dipole     | 0.0000             | 0.0000  | -6.8900 | 6.8900  |         |         |          |         |         |         |         |         |
| Quadrupole | -2.8074            | -6.1682 | 8.9756  | 0.0000  | 0.0000  | 0.0000  |          |         |         |         |         |         |
|            | Atomic coordinates |         |         | Mul.    | Lowdin  | Hirsch. | I-Hirsch | CM5     | ESP     | NPA     | AIM     | ACP     |
| 3          | 0.0000             | 0.0000  | -1.8091 | 0.6512  | 0.3891  | 0.4698  | 0.8679   | 0.5606  | 0.6751  | 0.8675  | 0.8859  | 0.6647  |
| 16         | 0.0000             | 0.0000  | 0.3392  | -0.6512 | -0.3891 | -0.4698 | -0.8679  | -0.5606 | -0.6751 | -0.8675 | -0.8859 | -0.6647 |

Dipole moment (in D) 6.89 (DEN) 6.72 4.02 4.85 8.96 5.78 6.97 8.95 9.14 6.86

-----  
File Lix\_17.out

Molecule\_17 Li+\_CH3  
SP Lix\_17 B3LYP/Def2TZVP VAC.  
1 5

|            |                    |         |         |         |         |         |          |         |         |         |         |         |
|------------|--------------------|---------|---------|---------|---------|---------|----------|---------|---------|---------|---------|---------|
| Dipole     | 0.0000             | -6.5762 | 0.0000  | 6.5762  |         |         |          |         |         |         |         |         |
| Quadrupole | -4.6088            | 9.2165  | -4.6077 | -0.0002 | 0.0000  | 0.0000  |          |         |         |         |         |         |
|            | Atomic coordinates |         |         | Mul.    | Lowdin  | Hirsch. | I-Hirsch | CM5     | ESP     | NPA     | AIM     | ACP     |
| 3          | 0.0000             | -1.7424 | 0.0000  | 0.9321  | 0.8370  | 0.7767  | 0.9860   | 0.8006  | 0.8726  | 0.9770  | 0.9552  | 0.8662  |
| 6          | 0.0000             | 0.5379  | 0.0000  | -0.5748 | -0.2161 | -0.0204 | -0.5040  | -0.1907 | -0.4849 | -0.5898 | -0.2901 | -0.2564 |
| 1          | -1.0772            | 0.6666  | 0.0000  | 0.2142  | 0.1264  | 0.0812  | 0.1726   | 0.1300  | 0.2029  | 0.2042  | 0.1117  | 0.1301  |
| 1          | 0.5385             | 0.6667  | 0.9330  | 0.2142  | 0.1264  | 0.0812  | 0.1727   | 0.1301  | 0.2047  | 0.2043  | 0.1117  | 0.1301  |
| 1          | 0.5385             | 0.6667  | -0.9330 | 0.2142  | 0.1264  | 0.0812  | 0.1727   | 0.1301  | 0.2047  | 0.2043  | 0.1117  | 0.1301  |

Dipole moment (in D) 6.58 (DEN) 7.23 6.35 5.77 7.89 5.94 6.60 7.74 7.67 6.66

-----  
File Lix\_18.out

Molecule\_18 Li+\_C2H5

SP Lix\_18 B3LYP/Def2TZVP VAC.

1 8

Dipole -7.4487 -2.8470 0.0000 7.9742

Quadrupole 12.2743 -4.8109 -7.4634 7.1539 0.0000 0.0000

|   | Atomic coordinates |         |         | Mul.    | Lowdin  | Hirsch. | I-Hirsch | CM5     | ESP     | NPA     | AIM     | ACP     |
|---|--------------------|---------|---------|---------|---------|---------|----------|---------|---------|---------|---------|---------|
| 6 | 0.9260             | -0.2696 | 0.0000  | -0.2951 | -0.3198 | -0.0556 | -0.3891  | -0.2064 | -0.0975 | -0.6954 | -0.0101 | -0.2282 |
| 6 | -0.3129            | 0.5416  | -0.0000 | -0.5615 | -0.2303 | -0.0300 | -0.3566  | -0.1657 | -0.3402 | -0.4345 | -0.2810 | -0.1984 |
| 1 | -0.6291            | 1.0271  | 0.9224  | 0.2158  | 0.1389  | 0.0664  | 0.1324   | 0.1178  | 0.1369  | 0.2010  | 0.0719  | 0.1083  |
| 1 | 1.0399             | -0.8837 | -0.8950 | 0.1520  | 0.1405  | 0.0616  | 0.1500   | 0.1127  | 0.0578  | 0.2354  | 0.0503  | 0.1119  |
| 1 | 1.0399             | -0.8836 | 0.8950  | 0.1520  | 0.1405  | 0.0616  | 0.1500   | 0.1127  | 0.0578  | 0.2354  | 0.0503  | 0.1119  |
| 1 | 1.7910             | 0.4168  | -0.0000 | 0.1922  | 0.1719  | 0.0851  | 0.2016   | 0.1351  | 0.1803  | 0.2819  | 0.0980  | 0.1364  |
| 1 | -0.6291            | 1.0271  | -0.9224 | 0.2158  | 0.1389  | 0.0664  | 0.1324   | 0.1178  | 0.1369  | 0.2010  | 0.0719  | 0.1083  |
| 3 | -2.0970            | -0.7786 | 0.0000  | 0.9288  | 0.8194  | 0.7444  | 0.9792   | 0.7759  | 0.8681  | 0.9753  | 0.9488  | 0.8499  |

Dipole moment (in D) 7.97 (DEN) 8.62 7.78 7.20 9.36 7.38 7.87 9.32 9.09 8.21

-----  
File Lix\_19.out

Molecule\_19 Li+\_C2H3

SP Lix\_19 B3LYP/Def2TZVP VAC.

1 6

Dipole -6.0426 -2.7364 1.0252 6.7121

Quadrupole 9.6137 -2.2690 -7.3447 4.7153 -0.7541 0.6715

|   | Atomic coordinates |         |         | Mul.    | Lowdin  | Hirsch. | I-Hirsch | CM5     | ESP     | NPA     | AIM     | ACP     |
|---|--------------------|---------|---------|---------|---------|---------|----------|---------|---------|---------|---------|---------|
| 6 | 0.7591             | -0.3025 | 0.0133  | -0.2156 | -0.1649 | 0.0079  | -0.2312  | -0.1000 | -0.1900 | -0.4430 | -0.0470 | -0.1178 |
| 6 | -0.1617            | 0.6131  | -0.1501 | -0.3419 | -0.1203 | -0.0230 | -0.3469  | -0.1125 | -0.2921 | -0.2679 | -0.3399 | -0.1432 |
| 1 | 0.8678             | -1.1711 | -0.6349 | 0.2072  | 0.1612  | 0.0936  | 0.1778   | 0.1455  | 0.2055  | 0.2429  | 0.1172  | 0.1383  |
| 1 | 1.4927             | -0.2251 | 0.8218  | 0.2055  | 0.1711  | 0.1023  | 0.2091   | 0.1537  | 0.2011  | 0.2628  | 0.1445  | 0.1513  |
| 1 | -0.3515            | 1.6219  | 0.1980  | 0.2352  | 0.1569  | 0.1064  | 0.2160   | 0.1581  | 0.2473  | 0.2306  | 0.1772  | 0.1519  |

|                      |            |         |        |        |        |        |        |        |        |        |        |        |
|----------------------|------------|---------|--------|--------|--------|--------|--------|--------|--------|--------|--------|--------|
| 3                    | -1.8645    | -0.6963 | 0.1452 | 0.9097 | 0.7959 | 0.7127 | 0.9751 | 0.7553 | 0.8282 | 0.9746 | 0.9478 | 0.8196 |
| Dipole moment (in D) | 6.71 (DEN) | 7.60    | 6.63   | 5.90   | 8.33   | 6.19   | 6.73   | 8.41   | 8.10   | 6.90   |        |        |

-----  
File Lix\_21.out

Molecule \_21 Li+\_propene

SP Lix\_21 B3LYP/Def2TZVP VAC.

1 10

Dipole 5.2260 5.8154 0.2246 7.8218

Quadrupole 4.8699 2.3261 -7.1960 10.2802 -0.1922 -0.0423

|   | Atomic coordinates |         |         | Mul.    | Lowdin  | Hirsch. | I-Hirsch | CM5     | ESP     | NPA     | AIM     | ACP     |
|---|--------------------|---------|---------|---------|---------|---------|----------|---------|---------|---------|---------|---------|
| 6 | 1.0438             | -0.5356 | -0.2175 | -0.6084 | -0.2520 | -0.0808 | -0.5479  | -0.2125 | -0.4039 | -0.5894 | -0.2456 | -0.2473 |
| 6 | -0.0770            | -0.2134 | 0.4491  | -0.1212 | -0.1887 | 0.0335  | 0.0647   | -0.0467 | 0.1573  | -0.1258 | -0.0802 | -0.0273 |
| 6 | -1.3867            | 0.1437  | -0.1679 | -0.2979 | -0.2624 | -0.0572 | -0.4207  | -0.2054 | -0.4195 | -0.6636 | -0.0039 | -0.2336 |
| 1 | -1.3333            | 0.2176  | -1.2540 | 0.1379  | 0.1367  | 0.0563  | 0.1471   | 0.1084  | 0.1300  | 0.2245  | 0.0403  | 0.1065  |
| 1 | -1.7916            | 1.0716  | 0.2447  | 0.1479  | 0.1412  | 0.0599  | 0.1435   | 0.1110  | 0.1166  | 0.2360  | 0.0457  | 0.1099  |
| 1 | -2.1159            | -0.6323 | 0.0853  | 0.1803  | 0.1585  | 0.0757  | 0.1816   | 0.1271  | 0.2251  | 0.2651  | 0.0834  | 0.1283  |
| 1 | -0.0620            | -0.2700 | 1.5367  | 0.1918  | 0.1645  | 0.0716  | 0.1264   | 0.1268  | 0.0667  | 0.2197  | 0.0716  | 0.1155  |
| 1 | 1.9165             | -0.9165 | 0.3068  | 0.2310  | 0.1513  | 0.0698  | 0.1584   | 0.1224  | 0.1434  | 0.2335  | 0.0715  | 0.1107  |
| 1 | 1.0554             | -0.5978 | -1.3033 | 0.2238  | 0.1507  | 0.0684  | 0.1658   | 0.1214  | 0.1644  | 0.2261  | 0.0704  | 0.1097  |
| 3 | 1.6166             | 1.5865  | 0.0005  | 0.9149  | 0.8000  | 0.7027  | 0.9810   | 0.7475  | 0.8199  | 0.9737  | 0.9465  | 0.8275  |

|                      |            |      |      |      |      |      |      |      |      |      |  |  |
|----------------------|------------|------|------|------|------|------|------|------|------|------|--|--|
| Dipole moment (in D) | 7.82 (DEN) | 8.71 | 7.80 | 6.91 | 9.57 | 7.28 | 7.64 | 9.54 | 9.27 | 8.16 |  |  |
|----------------------|------------|------|------|------|------|------|------|------|------|------|--|--|

-----  
File Lix\_22.out

Molecule \_22 Li+\_propyne

SP Lix\_22 B3LYP/Def2TZVP VAC.

1 8

Dipole -4.5135 5.8558 0.0000 7.3934

Quadrupole 7.0878 3.2372 -10.3251 -8.6483 0.0001 -0.0001

|   | Atomic coordinates |         |         | Mul.    | Lowdin  | Hirsch. | I-Hirsch | CM5     | ESP     | NPA     | AIM     | ACP     |
|---|--------------------|---------|---------|---------|---------|---------|----------|---------|---------|---------|---------|---------|
| 6 | -1.1780            | -0.5479 | -0.0000 | -0.2825 | -0.1098 | -0.0769 | -0.5385  | -0.1613 | -0.6812 | -0.4027 | -0.2392 | -0.1973 |
| 6 | -0.0117            | -0.2315 | 0.0000  | -0.0557 | -0.1049 | 0.0340  | 0.1626   | -0.0008 | 0.3053  | 0.0387  | -0.2771 | 0.0175  |

|   |         |         |         |         |         |         |         |         |         |         |        |         |
|---|---------|---------|---------|---------|---------|---------|---------|---------|---------|---------|--------|---------|
| 1 | -2.1413 | -1.0127 | 0.0000  | 0.2641  | 0.1657  | 0.1280  | 0.2745  | 0.1813  | 0.3981  | 0.2836  | 0.2243 | 0.1736  |
| 6 | 1.4100  | 0.0821  | -0.0000 | -0.3776 | -0.2371 | -0.0283 | -0.4337 | -0.1731 | -0.4480 | -0.7020 | 0.0634 | -0.2041 |
| 1 | 1.7021  | 0.6393  | -0.8916 | 0.1756  | 0.1558  | 0.0772  | 0.1733  | 0.1288  | 0.1571  | 0.2588  | 0.0835 | 0.1273  |
| 1 | 1.7018  | 0.6410  | 0.8906  | 0.1755  | 0.1558  | 0.0772  | 0.1733  | 0.1288  | 0.1570  | 0.2587  | 0.0835 | 0.1273  |
| 1 | 1.9660  | -0.8589 | 0.0010  | 0.1996  | 0.1728  | 0.0922  | 0.2077  | 0.1441  | 0.2592  | 0.2862  | 0.1173 | 0.1439  |
| 3 | -1.5168 | 1.5916  | -0.0000 | 0.9010  | 0.8018  | 0.6967  | 0.9808  | 0.7522  | 0.8525  | 0.9788  | 0.9445 | 0.8118  |

Dipole moment (in D) 7.39 (DEN) 8.51 7.31 6.38 9.00 6.82 7.30 9.16 8.65 7.49

-----  
File Lix\_26.out

Molecule\_26 Li(NH3)+  
SP Lix\_26 B3LYP/Def2TZVP VAC.

1 5

Dipole 0.0000 4.5558 0.0000 4.5558

Quadrupole -3.9101 7.8196 -3.9094 -0.0003 0.0000 0.0000

|   | Atomic coordinates |         |         | Mul.    | Lowdin  | Hirsch. | I-Hirsch | CM5     | ESP     | NPA     | AIM     | ACP     |
|---|--------------------|---------|---------|---------|---------|---------|----------|---------|---------|---------|---------|---------|
| 3 | -0.0000            | 1.6043  | 0.0000  | 0.9176  | 0.7931  | 0.7368  | 0.9987   | 0.8555  | 0.9308  | 0.9808  | 0.9494  | 0.8715  |
| 7 | -0.0000            | -0.3589 | 0.0000  | -0.8036 | -0.3183 | -0.1968 | -1.2038  | -0.8546 | -1.2277 | -1.1867 | -1.1614 | -0.7040 |
| 1 | 0.9346             | -0.7669 | 0.0000  | 0.2953  | 0.1751  | 0.1533  | 0.4017   | 0.3330  | 0.4310  | 0.4020  | 0.4040  | 0.2775  |
| 1 | -0.4673            | -0.7669 | 0.8095  | 0.2953  | 0.1751  | 0.1533  | 0.4017   | 0.3330  | 0.4330  | 0.4020  | 0.4040  | 0.2775  |
| 1 | -0.4673            | -0.7669 | -0.8095 | 0.2953  | 0.1751  | 0.1533  | 0.4017   | 0.3330  | 0.4330  | 0.4020  | 0.4040  | 0.2775  |

Dipole moment (in D) 4.56 (DEN) 5.19 4.73 4.32 5.33 4.39 4.51 5.16 4.85 4.86

-----  
File Lix\_27.out

Molecule\_27 Li+\_N(CH3)H2  
SP Lix\_27 B3LYP/Def2TZVP VAC.

1 8

Dipole 5.9658 2.7148 0.0000 6.5545

Quadrupole 9.6470 -3.6022 -6.0448 4.9510 0.0000 0.0000

|   | Atomic coordinates |        |        | Mul.    | Lowdin  | Hirsch. | I-Hirsch | CM5     | ESP     | NPA     | AIM     | ACP     |
|---|--------------------|--------|--------|---------|---------|---------|----------|---------|---------|---------|---------|---------|
| 3 | 1.9520             | 0.7102 | 0.0000 | 0.9079  | 0.7828  | 0.7145  | 0.9952   | 0.8409  | 0.9019  | 0.9798  | 0.9465  | 0.8611  |
| 7 | 0.0000             | 0.5890 | 0.0000 | -0.6954 | -0.1963 | -0.1732 | -1.0282  | -0.7395 | -1.0270 | -0.9683 | -1.1242 | -0.6315 |

|   |         |         |         |         |         |         |         |         |        |         |        |         |
|---|---------|---------|---------|---------|---------|---------|---------|---------|--------|---------|--------|---------|
| 6 | -0.5212 | -0.8146 | 0.0000  | -0.2643 | -0.3215 | -0.0055 | -0.1190 | -0.1125 | 0.2542 | -0.4159 | 0.2633 | -0.1123 |
| 1 | -0.3992 | 1.0741  | 0.8024  | 0.2812  | 0.1798  | 0.1411  | 0.3739  | 0.3256  | 0.3901 | 0.3878  | 0.3820 | 0.2619  |
| 1 | -0.3992 | 1.0741  | -0.8024 | 0.2812  | 0.1798  | 0.1411  | 0.3739  | 0.3256  | 0.3901 | 0.3878  | 0.3820 | 0.2619  |
| 1 | -1.6102 | -0.8437 | 0.0000  | 0.1741  | 0.1248  | 0.0626  | 0.1442  | 0.1212  | 0.0506 | 0.2161  | 0.0628 | 0.1246  |
| 1 | -0.1600 | -1.3351 | 0.8857  | 0.1576  | 0.1253  | 0.0597  | 0.1300  | 0.1194  | 0.0200 | 0.2064  | 0.0441 | 0.1171  |
| 1 | -0.1600 | -1.3351 | -0.8857 | 0.1576  | 0.1253  | 0.0597  | 0.1300  | 0.1194  | 0.0200 | 0.2064  | 0.0441 | 0.1171  |

Dipole moment (in D) 6.55 (DEN) 6.92 7.03 6.09 7.34 6.33 6.51 7.28 6.56 6.61

-----  
File Lix\_28.out

Molecule \_28 Li+\_N(CH3)2H

SP Lix\_28 B3LYP/Def2TZVP VAC.

1 11

Dipole -4.0628 5.4432 0.0000 6.7923

Quadrupole 1.3988 4.0095 -5.4083 -8.9803 0.0000 0.0000

|   | Atomic coordinates |         |         | Mul.    | Lowdin  | Hirsch. | I-Hirsch | CM5     | ESP     | NPA     | AIM     | ACP     |
|---|--------------------|---------|---------|---------|---------|---------|----------|---------|---------|---------|---------|---------|
| 3 | -1.3726            | 1.6678  | 0.0000  | 0.9010  | 0.7722  | 0.6917  | 0.9867   | 0.8268  | 0.8848  | 0.9809  | 0.9446  | 0.8513  |
| 7 | 0.1259             | 0.4191  | 0.0000  | -0.5700 | -0.0978 | -0.1435 | -0.7789  | -0.6203 | -0.7325 | -0.7589 | -1.0987 | -0.5464 |
| 1 | 1.0038             | 0.9351  | 0.0000  | 0.2621  | 0.1900  | 0.1324  | 0.3402   | 0.3222  | 0.3643  | 0.3803  | 0.3674  | 0.2497  |
| 6 | 0.1259             | -0.4213 | 1.2279  | -0.2678 | -0.3108 | -0.0129 | -0.1617  | -0.1167 | -0.0192 | -0.4256 | 0.2651  | -0.1205 |
| 6 | 0.1259             | -0.4213 | -1.2279 | -0.2678 | -0.3108 | -0.0129 | -0.1617  | -0.1167 | -0.0192 | -0.4256 | 0.2651  | -0.1205 |
| 1 | 0.9514             | -1.1366 | 1.2250  | 0.1638  | 0.1259  | 0.0583  | 0.1394   | 0.1178  | 0.1190  | 0.2113  | 0.0539  | 0.1179  |
| 1 | -0.8076            | -0.9820 | 1.2878  | 0.1510  | 0.1266  | 0.0559  | 0.1234   | 0.1164  | 0.0830  | 0.2024  | 0.0349  | 0.1107  |
| 1 | 0.2169             | 0.2103  | 2.1116  | 0.1564  | 0.1261  | 0.0584  | 0.1249   | 0.1182  | 0.0588  | 0.2108  | 0.0394  | 0.1147  |
| 1 | 0.9514             | -1.1366 | -1.2250 | 0.1638  | 0.1259  | 0.0583  | 0.1394   | 0.1178  | 0.1190  | 0.2113  | 0.0539  | 0.1179  |
| 1 | -0.8076            | -0.9820 | -1.2878 | 0.1510  | 0.1266  | 0.0559  | 0.1234   | 0.1164  | 0.0830  | 0.2024  | 0.0349  | 0.1107  |
| 1 | 0.2169             | 0.2103  | -2.1116 | 0.1564  | 0.1261  | 0.0584  | 0.1249   | 0.1182  | 0.0588  | 0.2108  | 0.0394  | 0.1147  |

Dipole moment (in D) 6.79 (DEN) 7.18 7.14 6.17 7.85 6.52 6.68 7.67 6.79 6.85

-----  
File Lix\_29.out

Molecule \_29 Li+\_N(CH3)3

SP Lix\_29 B3LYP/Def2TZVP VAC.

```

1 14
Dipole      -1.8820    6.5535    0.0000    6.8184
Quadrupole  -4.5073   10.3484   -5.8410   -4.6496    0.0000    0.0000

      Atomic coordinates      Mul.      Lowdin      Hirsch.      I-Hirsch      CM5      ESP      NPA      AIM      ACP
3  -0.6008    2.0937    0.0000    0.8977    0.7620    0.6698    0.9752    0.8147    0.8836    0.9855    0.9435    0.8427
7  -0.0637    0.2239    0.0000   -0.4770   -0.0265   -0.1103   -0.4390   -0.4979   -0.3263   -0.5633   -1.0818   -0.4521
6  1.4165    0.1345    0.0000   -0.2646   -0.2955   -0.0182   -0.2214   -0.1191   -0.4203   -0.4309    0.2672   -0.1273
6  -0.6008   -0.4420    1.2114   -0.2648   -0.2955   -0.0181   -0.2215   -0.1192   -0.3113   -0.4310    0.2667   -0.1273
6  -0.6008   -0.4420   -1.2114   -0.2648   -0.2955   -0.0181   -0.2215   -0.1192   -0.3113   -0.4310    0.2668   -0.1273
1  1.7489   -0.9086    0.0000    0.1575    0.1284    0.0551    0.1371    0.1155    0.2138    0.2082    0.0483    0.1124
1  1.8217    0.6203    0.8884    0.1501    0.1276    0.0549    0.1195    0.1157    0.1683    0.2077    0.0321    0.1090
1  1.8217    0.6203   -0.8884    0.1501    0.1276    0.0549    0.1195    0.1157    0.1683    0.2077    0.0321    0.1090
1  -0.3164   -1.4989    1.2398    0.1575    0.1284    0.0552    0.1372    0.1155    0.1900    0.2083    0.0484    0.1124
1  -1.6899   -0.3828    1.2204    0.1501    0.1276    0.0549    0.1194    0.1157    0.1372    0.2076    0.0320    0.1090
1  -0.2098    0.0394    2.1086    0.1502    0.1277    0.0549    0.1195    0.1157    0.1405    0.2077    0.0321    0.1090
1  -0.3164   -1.4989   -1.2398    0.1575    0.1284    0.0552    0.1372    0.1155    0.1900    0.2083    0.0484    0.1124
1  -0.2098    0.0394   -2.1086    0.1502    0.1277    0.0549    0.1195    0.1157    0.1405    0.2077    0.0321    0.1090
1  -1.6899   -0.3828   -1.2204    0.1501    0.1276    0.0549    0.1194    0.1157    0.1372    0.2076    0.0320    0.1090

Dipole moment (in D)  6.82 (DEN)    7.19    6.90    6.03    8.20    6.48    6.73    7.80    6.81    6.89

```

-----  
File Lix\_30.out

Molecule\_30 C5H5N-Li+

SP Lix\_30 B3LYP/Def2TZVP VAC.

```

1 12
Dipole      -8.5566    0.0000   -0.0021    8.5566
Quadrupole  27.1501   -7.8992  -19.2509    0.0000    0.0061    0.0000

      Atomic coordinates      Mul.      Lowdin      Hirsch.      I-Hirsch      CM5      ESP      NPA      AIM      ACP
7  -1.1897   -0.0005    0.0001   -0.5485    0.0572   -0.1656   -0.7562   -0.4905   -0.8709   -0.6370   -1.2987   -0.5008
6  -0.4939   -1.1529    0.0001    0.0831   -0.1729    0.0521    0.2108    0.0672    0.4650    0.0386    0.4651    0.0891
6  0.8890   -1.1961    0.0000   -0.1172   -0.1032   -0.0048   -0.1406   -0.0557   -0.3571   -0.2190    0.0060   -0.0489
6  1.5945    0.0005   -0.0001   -0.0821   -0.0620    0.0279    0.0235   -0.0259    0.2538   -0.1140    0.0120   -0.0171
6  -0.4947    1.1525    0.0002    0.0832   -0.1729    0.0521    0.2107    0.0671    0.4647    0.0384    0.4645    0.0890
6  0.8880    1.1966   -0.0001   -0.1174   -0.1032   -0.0048   -0.1405   -0.0557   -0.3570   -0.2190    0.0059   -0.0489

```

|   |         |         |         |        |        |        |        |        |        |        |        |        |
|---|---------|---------|---------|--------|--------|--------|--------|--------|--------|--------|--------|--------|
| 1 | -1.0677 | -2.0726 | 0.0000  | 0.1484 | 0.1492 | 0.0657 | 0.0913 | 0.1315 | 0.0172 | 0.2017 | 0.0591 | 0.1141 |
| 1 | 1.3975  | -2.1500 | 0.0002  | 0.1682 | 0.1629 | 0.0743 | 0.1440 | 0.1309 | 0.1803 | 0.2435 | 0.0931 | 0.1230 |
| 1 | 2.6766  | 0.0010  | -0.0004 | 0.1702 | 0.1636 | 0.0782 | 0.1386 | 0.1343 | 0.0937 | 0.2398 | 0.0966 | 0.1270 |
| 1 | -1.0696 | 2.0716  | 0.0002  | 0.1483 | 0.1492 | 0.0656 | 0.0912 | 0.1315 | 0.0173 | 0.2017 | 0.0590 | 0.1141 |
| 1 | 1.3961  | 2.1507  | -0.0001 | 0.1682 | 0.1629 | 0.0743 | 0.1440 | 0.1309 | 0.1803 | 0.2435 | 0.0931 | 0.1230 |
| 3 | -3.1008 | -0.0002 | -0.0005 | 0.8958 | 0.7692 | 0.6850 | 0.9830 | 0.8343 | 0.9128 | 0.9819 | 0.9442 | 0.8365 |

Dipole moment (in D) 8.56 (DEN) 9.31 9.56 8.00 9.56 8.48 8.48 9.63 6.82 8.46

-----  
File Lix\_31.out

Molecule\_31 HCN-Li+

SP Lix\_31 B3LYP/Def2TZVP VAC.

1 4

Dipole 0.0000 0.0000 4.9085 4.9085

Quadrupole -8.9727 -8.9727 17.9454 0.0000 0.0000 0.0000

|   | Atomic coordinates |        |         | Mul.    | Lowdin | Hirsch. | I-Hirsch | CM5     | ESP     | NPA     | AIM     | ACP     |
|---|--------------------|--------|---------|---------|--------|---------|----------|---------|---------|---------|---------|---------|
| 1 | 0.0000             | 0.0000 | -2.0200 | 0.2742  | 0.1676 | 0.1811  | 0.2586   | 0.2402  | 0.2550  | 0.2734  | 0.3076  | 0.2431  |
| 6 | 0.0000             | 0.0000 | -0.9466 | 0.0379  | 0.0151 | 0.2157  | 0.3500   | 0.2845  | 0.3554  | 0.3008  | 1.0912  | 0.2839  |
| 7 | 0.0000             | 0.0000 | 0.1948  | -0.2478 | 0.0245 | -0.1405 | -0.6048  | -0.4070 | -0.5462 | -0.5623 | -1.3579 | -0.3944 |
| 3 | 0.0000             | 0.0000 | 2.1118  | 0.9358  | 0.7928 | 0.7437  | 0.9963   | 0.8823  | 0.9358  | 0.9881  | 0.9591  | 0.8674  |

Dipole moment (in D) 4.91 (DEN) 6.43 6.37 4.67 5.44 4.94 4.89 5.48 0.51 4.78

-----  
File Lix\_32.out

Molecule\_32 CH3CN-Li+

SP Lix\_32 B3LYP/Def2TZVP VAC.

1 7

Dipole 6.8870 -0.0006 -0.0005 6.8870

Quadrupole 26.0742 -13.0370 -13.0372 -0.0016 -0.0010 0.0000

|   | Atomic coordinates |         |         | Mul.    | Lowdin  | Hirsch. | I-Hirsch | CM5     | ESP     | NPA     | AIM    | ACP     |
|---|--------------------|---------|---------|---------|---------|---------|----------|---------|---------|---------|--------|---------|
| 6 | -0.1205            | -0.0001 | -0.0000 | 0.0811  | -0.0903 | 0.1982  | 0.6564   | 0.3023  | 0.6615  | 0.4952  | 1.0217 | 0.3432  |
| 6 | -1.5661            | -0.0000 | -0.0000 | -0.2389 | -0.2141 | -0.0110 | -0.5093  | -0.1506 | -0.5169 | -0.7298 | 0.0784 | -0.1812 |
| 1 | -1.9324            | -0.8453 | 0.5847  | 0.1910  | 0.1710  | 0.0952  | 0.2094   | 0.1479  | 0.2200  | 0.2852  | 0.1227 | 0.1493  |



|   |         |         |         |         |        |         |         |         |         |         |         |         |
|---|---------|---------|---------|---------|--------|---------|---------|---------|---------|---------|---------|---------|
| 1 | -1.9324 | 0.9291  | 0.4397  | 0.1910  | 0.1710 | 0.0952  | 0.2094  | 0.1479  | 0.2201  | 0.2852  | 0.1227  | 0.1493  |
| 1 | -1.9325 | -0.0837 | -1.0244 | 0.1910  | 0.1710 | 0.0952  | 0.2094  | 0.1479  | 0.2201  | 0.2852  | 0.1227  | 0.1493  |
| 7 | 1.0276  | 0.0001  | 0.0001  | -0.3348 | 0.0147 | -0.1962 | -0.7757 | -0.4704 | -0.7486 | -0.6060 | -1.4227 | -0.4658 |
| 3 | 2.9080  | -0.0001 | -0.0001 | 0.9196  | 0.7766 | 0.7234  | 1.0006  | 0.8752  | 0.9438  | 0.9850  | 0.9545  | 0.8560  |

Dipole moment (in D) 6.89 (DEN) 7.62 7.82 6.45 7.77 6.74 6.87 8.03 1.71 6.66

-----  
File Lix\_33.out

Molecule \_33 Li(H2O)+  
SP Lix\_33 B3LYP/Def2TZVP VAC.

1 4

Dipole 0.0000 0.0000 -3.9874 3.9874

Quadrupole -6.0426 -2.3934 8.4360 0.0000 0.0000 0.0000

|   | Atomic coordinates |         |         | Mul.    | Lowdin  | Hirsch. | I-Hirsch | CM5     | ESP     | NPA     | AIM     | ACP     |
|---|--------------------|---------|---------|---------|---------|---------|----------|---------|---------|---------|---------|---------|
| 3 | 0.0000             | 0.0000  | -1.4959 | 0.9309  | 0.8205  | 0.7645  | 1.0127   | 0.8692  | 0.9849  | 0.9903  | 0.9592  | 0.8510  |
| 8 | 0.0000             | 0.0000  | 0.3321  | -0.7283 | -0.2369 | -0.2168 | -1.1163  | -0.6506 | -1.0854 | -1.0333 | -1.2296 | -0.5161 |
| 1 | 0.0000             | 0.7721  | 0.9154  | 0.3987  | 0.2082  | 0.2262  | 0.5518   | 0.3907  | 0.5503  | 0.5215  | 0.6352  | 0.3326  |
| 1 | 0.0000             | -0.7721 | 0.9154  | 0.3987  | 0.2082  | 0.2262  | 0.5518   | 0.3907  | 0.5503  | 0.5215  | 0.6352  | 0.3326  |

Dipole moment (in D) 3.99 (DEN) 4.34 4.44 3.85 4.20 3.85 3.97 4.18 3.27 4.01

-----  
File Lix\_37.out

Molecule \_37 Li+\_CH3OH  
SP Lix\_37 B3LYP/Def2TZVP VAC.

1 7

Dipole -5.9856 1.4013 0.0005 6.1474

Quadrupole 10.7261 -2.6312 -8.0949 -4.6678 -0.0003 -0.0004

|   | Atomic coordinates |         |         | Mul.    | Lowdin  | Hirsch. | I-Hirsch | CM5     | ESP     | NPA     | AIM     | ACP     |
|---|--------------------|---------|---------|---------|---------|---------|----------|---------|---------|---------|---------|---------|
| 8 | -0.4101            | -0.3339 | -0.0000 | -0.6347 | -0.0955 | -0.2030 | -0.8728  | -0.5303 | -0.8668 | -0.8469 | -1.1756 | -0.4351 |
| 6 | 0.9528             | 0.1994  | -0.0000 | -0.1386 | -0.2818 | 0.0459  | -0.0300  | -0.0888 | 0.1579  | -0.2487 | 0.3923  | -0.0858 |
| 1 | 1.4730             | -0.1295 | -0.8970 | 0.1733  | 0.1235  | 0.0697  | 0.1345   | 0.1278  | 0.0801  | 0.2040  | 0.0794  | 0.1251  |
| 1 | 0.8714             | 1.2834  | 0.0008  | 0.1339  | 0.1228  | 0.0694  | 0.1218   | 0.1287  | 0.0838  | 0.1919  | 0.0562  | 0.1186  |
| 1 | 1.4732             | -0.1306 | 0.8964  | 0.1733  | 0.1235  | 0.0697  | 0.1345   | 0.1278  | 0.0800  | 0.2040  | 0.0794  | 0.1251  |

|                      |            |         |        |        |        |        |        |        |        |        |        |        |
|----------------------|------------|---------|--------|--------|--------|--------|--------|--------|--------|--------|--------|--------|
| 1                    | -0.3598    | -1.2982 | 0.0002 | 0.3746 | 0.2069 | 0.2096 | 0.5090 | 0.3803 | 0.5167 | 0.5078 | 0.6140 | 0.3147 |
| 3                    | -1.9648    | 0.5833  | 0.0000 | 0.9182 | 0.8006 | 0.7388 | 1.0030 | 0.8547 | 0.9483 | 0.9879 | 0.9539 | 0.8375 |
| Dipole moment (in D) | 6.15 (DEN) | 5.94    | 6.90   | 5.64   | 6.55   | 5.91   | 6.09   | 6.20   | 4.79   | 5.93   |        |        |

-----  
File Lix\_38.out

Molecule\_38            Li+\_0(CH3)2  
SP Lix\_38 B3LYP/Def2TZVP VAC.

|                      |                    |         |         |         |         |          |         |         |         |         |         |         |
|----------------------|--------------------|---------|---------|---------|---------|----------|---------|---------|---------|---------|---------|---------|
| 1                    | 10                 |         |         |         |         |          |         |         |         |         |         |         |
| Dipole               | 0.0001             | -6.4618 | 0.0001  | 6.4618  |         |          |         |         |         |         |         |         |
| Quadrupole           | -3.8620            | 12.4386 | -8.5766 | -0.0003 | -0.0002 | -0.0002  |         |         |         |         |         |         |
|                      | Atomic coordinates |         | Mul.    | Lowdin  | Hirsch. | I-Hirsch | CM5     | ESP     | NPA     | AIM     | ACP     |         |
| 8                    | 0.0000             | -0.3546 | -0.0000 | -0.5389 | 0.0442  | -0.1729  | -0.5505 | -0.3921 | -0.4311 | -0.6516 | -1.1379 | -0.3369 |
| 6                    | -1.2010            | 0.4520  | -0.0000 | -0.1389 | -0.2863 | 0.0356   | -0.0813 | -0.0955 | -0.2479 | -0.2588 | 0.4133  | -0.0926 |
| 6                    | 1.2010             | 0.4521  | 0.0000  | -0.1389 | -0.2863 | 0.0356   | -0.0813 | -0.0955 | -0.2437 | -0.2588 | 0.4134  | -0.0926 |
| 1                    | -1.2261            | 1.0747  | -0.8947 | 0.1632  | 0.1247  | 0.0642   | 0.1267  | 0.1233  | 0.1814  | 0.1993  | 0.0681  | 0.1176  |
| 1                    | -1.2259            | 1.0750  | 0.8945  | 0.1632  | 0.1247  | 0.0642   | 0.1267  | 0.1233  | 0.1814  | 0.1993  | 0.0681  | 0.1176  |
| 1                    | -2.0563            | -0.2218 | 0.0003  | 0.1263  | 0.1228  | 0.0659   | 0.1090  | 0.1253  | 0.1410  | 0.1927  | 0.0443  | 0.1126  |
| 1                    | 1.2259             | 1.0750  | -0.8945 | 0.1632  | 0.1247  | 0.0642   | 0.1267  | 0.1233  | 0.1810  | 0.1993  | 0.0681  | 0.1176  |
| 1                    | 1.2260             | 1.0747  | 0.8947  | 0.1632  | 0.1247  | 0.0642   | 0.1267  | 0.1233  | 0.1810  | 0.1993  | 0.0681  | 0.1176  |
| 1                    | 2.0563             | -0.2218 | -0.0002 | 0.1263  | 0.1228  | 0.0659   | 0.1090  | 0.1253  | 0.1391  | 0.1927  | 0.0443  | 0.1126  |
| 3                    | 0.0000             | -2.1479 | 0.0000  | 0.9113  | 0.7840  | 0.7131   | 0.9883  | 0.8395  | 0.9177  | 0.9867  | 0.9503  | 0.8264  |
| Dipole moment (in D) | 6.46 (DEN)         | 5.99    | 7.09    | 5.72    | 7.23    | 6.13     | 6.36    | 6.49    | 4.76    | 6.16    |         |         |

-----  
File Lix\_46.out

Molecule\_46            Li+CH2Cl2  
SP Lix\_46 B3LYP/Def2TZVP VAC.

|            |                    |         |         |         |         |          |         |         |         |         |        |        |
|------------|--------------------|---------|---------|---------|---------|----------|---------|---------|---------|---------|--------|--------|
| 1          | 6                  |         |         |         |         |          |         |         |         |         |        |        |
| Dipole     | 0.0000             | 0.0000  | -4.6732 | 4.6732  |         |          |         |         |         |         |        |        |
| Quadrupole | -6.8782            | -6.1564 | 13.0346 | 0.0000  | 0.0000  | 0.0000   |         |         |         |         |        |        |
|            | Atomic coordinates |         | Mul.    | Lowdin  | Hirsch. | I-Hirsch | CM5     | ESP     | NPA     | AIM     | ACP    |        |
| 6          | 0.0000             | 0.0000  | 0.9468  | -0.0694 | -0.6376 | 0.0797   | -0.1012 | -0.0232 | -0.9299 | -0.3620 | 0.2097 | 0.0566 |

|    |         |         |         |         |        |        |         |        |        |         |         |         |
|----|---------|---------|---------|---------|--------|--------|---------|--------|--------|---------|---------|---------|
| 1  | -0.9069 | 0.0000  | 1.5399  | 0.2099  | 0.1341 | 0.0938 | 0.1713  | 0.1497 | 0.4765 | 0.2535  | 0.1634  | 0.1481  |
| 1  | 0.9069  | 0.0000  | 1.5399  | 0.2099  | 0.1341 | 0.0938 | 0.1713  | 0.1497 | 0.4774 | 0.2535  | 0.1634  | 0.1481  |
| 17 | 0.0000  | 1.4742  | -0.0857 | -0.0894 | 0.3960 | 0.0729 | -0.0839 | 0.0290 | 0.0924 | -0.0403 | -0.2358 | -0.0491 |
| 17 | 0.0000  | -1.4742 | -0.0857 | -0.0894 | 0.3960 | 0.0729 | -0.0839 | 0.0290 | 0.0924 | -0.0403 | -0.2358 | -0.0491 |
| 3  | 0.0000  | 0.0000  | -1.9493 | 0.8285  | 0.5773 | 0.5869 | 0.9266  | 0.6658 | 0.7912 | 0.9355  | 0.9349  | 0.7453  |

Dipole moment (in D) 4.67 (DEN) 4.89 6.65 3.80 6.53 4.15 4.66 6.62 5.19 4.49

-----  
File Lix\_47.out

Molecule\_47 Li+S(CH3)2

SP Lix\_47 B3LYP/Def2TZVP VAC.

1 10

Dipole -0.0044 -7.1957 3.2259 7.8857

Quadrupole -5.3564 15.5778 -10.2213 0.0131 -0.0035 -6.8533

|    | Atomic coordinates |         |         | Mu1.    | Lowdin  | Hirsch. | I-Hirsch | CM5     | ESP     | NPA     | AIM     | ACP     |
|----|--------------------|---------|---------|---------|---------|---------|----------|---------|---------|---------|---------|---------|
| 16 | -0.0001            | -0.3379 | -0.3819 | -0.1849 | 0.4932  | 0.0370  | -0.0706  | -0.0696 | -0.1975 | 0.0610  | -0.1920 | -0.1996 |
| 6  | -1.4172            | 0.6450  | 0.2026  | -0.3279 | -0.4614 | -0.0517 | -0.4145  | -0.1870 | -0.4039 | -0.7104 | -0.0949 | -0.1842 |
| 6  | 1.4177             | 0.6441  | 0.2027  | -0.3278 | -0.4614 | -0.0517 | -0.4145  | -0.1870 | -0.4010 | -0.7104 | -0.0950 | -0.1842 |
| 1  | -1.3831            | 1.6175  | -0.2843 | 0.1749  | 0.1278  | 0.0684  | 0.1740   | 0.1216  | 0.2422  | 0.2419  | 0.0860  | 0.1294  |
| 1  | -1.4045            | 0.7629  | 1.2839  | 0.1575  | 0.1170  | 0.0581  | 0.1485   | 0.1109  | 0.1510  | 0.2250  | 0.0624  | 0.1158  |
| 1  | -2.3224            | 0.1272  | -0.1096 | 0.1633  | 0.1268  | 0.0666  | 0.1593   | 0.1196  | 0.1864  | 0.2415  | 0.0740  | 0.1257  |
| 1  | 1.3849             | 1.6162  | -0.2851 | 0.1749  | 0.1278  | 0.0684  | 0.1739   | 0.1216  | 0.2419  | 0.2419  | 0.0860  | 0.1294  |
| 1  | 1.4044             | 0.7628  | 1.2839  | 0.1575  | 0.1170  | 0.0582  | 0.1485   | 0.1109  | 0.1500  | 0.2250  | 0.0624  | 0.1158  |
| 1  | 2.3226             | 0.1251  | -0.1085 | 0.1632  | 0.1268  | 0.0666  | 0.1593   | 0.1196  | 0.1859  | 0.2415  | 0.0740  | 0.1257  |
| 3  | -0.0014            | -2.4463 | 0.6326  | 0.8494  | 0.6863  | 0.6800  | 0.9359   | 0.7393  | 0.8451  | 0.9430  | 0.9373  | 0.8263  |

Dipole moment (in D) 7.89 (DEN) 8.44 8.81 7.20 10.04 7.48 7.69 10.40 10.03 8.27

-----  
File Lix\_48.out

Molecule\_48 Li+CH3F

SP Lix\_48 B3LYP/Def2TZVP VAC.

1 6

Dipole 0.0016 6.2592 0.0000 6.2592

Quadrupole      -7.7972    15.5944    -7.7971    0.0048    0.0000    0.0000

|   | Atomic coordinates |         |         | Mul.    | Lowdin  | Hirsch. | I-Hirsch | CM5     | ESP     | NPA     | AIM     | ACP     |
|---|--------------------|---------|---------|---------|---------|---------|----------|---------|---------|---------|---------|---------|
| 9 | 0.0000             | 0.4200  | 0.0000  | -0.3837 | -0.0246 | -0.1281 | -0.4012  | -0.2484 | -0.3426 | -0.4936 | -0.6978 | -0.2306 |
| 6 | -0.0001            | -1.0408 | 0.0000  | -0.0693 | -0.1891 | 0.1005  | -0.0209  | -0.0335 | -0.0732 | -0.1052 | 0.4003  | -0.0401 |
| 1 | 1.0430             | -1.3376 | 0.0000  | 0.1729  | 0.1259  | 0.0836  | 0.1427   | 0.1364  | 0.1628  | 0.2020  | 0.1114  | 0.1398  |
| 1 | -0.5218            | -1.3375 | 0.9034  | 0.1729  | 0.1259  | 0.0836  | 0.1427   | 0.1364  | 0.1612  | 0.2020  | 0.1114  | 0.1398  |
| 1 | -0.5218            | -1.3375 | -0.9034 | 0.1729  | 0.1259  | 0.0836  | 0.1427   | 0.1364  | 0.1612  | 0.2020  | 0.1114  | 0.1398  |
| 3 | 0.0005             | 2.1591  | 0.0000  | 0.9343  | 0.8360  | 0.7767  | 0.9941   | 0.8728  | 0.9306  | 0.9929  | 0.9637  | 0.8515  |

Dipole moment (in D)    6.26 (DEN)      5.93      7.14      5.68      6.86      6.09      6.21      5.93      4.44      5.87

-----  
Keywords:

File mol197.out

Molecule 197    BeClF

SP Mol197 B3LYP/Def2TZVP VAC.

0    3

|            | Atomic coordinates |        |         | Mul.    | Lowdin  | Hirsch. | I-Hirsch | CM5     | ESP     | NPA     | AIM     | ACP     |
|------------|--------------------|--------|---------|---------|---------|---------|----------|---------|---------|---------|---------|---------|
| Dipole     | 0.0000             | 0.0000 | 0.2956  | 0.2956  |         |         |          |         |         |         |         |         |
| Quadrupole | 2.0794             | 2.0794 | -4.1588 | 0.0000  | 0.0000  | 0.0000  |          |         |         |         |         |         |
| 9          | 0.0000             | 0.0000 | -1.9742 | -0.2422 | -0.1027 | -0.2728 | -0.6380  | -0.4386 | -0.3649 | -0.8582 | -0.8773 | -0.4222 |
| 4          | 0.0000             | 0.0000 | -0.6034 | 0.4400  | -0.2049 | 0.4419  | 1.1813   | 0.7346  | 0.6241  | 1.5989  | 1.7278  | 0.7615  |
| 17         | 0.0000             | 0.0000 | 1.1871  | -0.1978 | 0.3076  | -0.1691 | -0.5433  | -0.2960 | -0.2592 | -0.7407 | -0.8505 | -0.3393 |

Dipole moment (in D)    0.30 (DEN)      0.11      3.32      0.34      0.47      0.34      0.17      0.72      1.54      0.14

-----  
File mol198.out

Molecule 198    BeBrF

SP Mol198 B3LYP/Def2TZVP VAC.

0    3

|            | Atomic coordinates |        |         | Mul.    | Lowdin  | Hirsch. | I-Hirsch | CM5     | ESP     | NPA     | AIM     | ACP     |
|------------|--------------------|--------|---------|---------|---------|---------|----------|---------|---------|---------|---------|---------|
| Dipole     | 0.0000             | 0.0000 | 0.3674  | 0.3674  |         |         |          |         |         |         |         |         |
| Quadrupole | 2.0216             | 2.0216 | -4.0431 | 0.0000  | 0.0000  | 0.0000  |          |         |         |         |         |         |
| 9          | 0.0000             | 0.0000 | -2.5262 | -0.2306 | -0.0976 | -0.2717 | -0.6168  | -0.4387 | -0.3278 | -0.8589 | -0.8765 | -0.4197 |

|                      |            |        |         |         |         |         |         |         |         |         |         |         |
|----------------------|------------|--------|---------|---------|---------|---------|---------|---------|---------|---------|---------|---------|
| 4                    | 0.0000     | 0.0000 | -1.1573 | 0.3802  | -0.2275 | 0.4078  | 1.1015  | 0.6856  | 0.5306  | 1.5503  | 1.7042  | 0.7214  |
| 35                   | 0.0000     | 0.0000 | 0.7818  | -0.1496 | 0.3251  | -0.1361 | -0.4846 | -0.2470 | -0.2028 | -0.6914 | -0.8280 | -0.3017 |
| Dipole moment (in D) | 0.37 (DEN) | 0.12   | 3.67    | 0.52    | 0.46    | 0.58    | 0.27    | 0.79    | 1.95    | 0.05    |         |         |

-----  
File mol199.out

Molecule 199 BeBrCl

SP Mol199 B3LYP/Def2TZVP VAC.

0 3

|                      |                    |        |         |         |         |         |          |         |         |         |         |         |
|----------------------|--------------------|--------|---------|---------|---------|---------|----------|---------|---------|---------|---------|---------|
| Dipole               | 0.0000             | 0.0000 | 0.0636  | 0.0636  |         |         |          |         |         |         |         |         |
| Quadrupole           | 1.1352             | 1.1352 | -2.2704 | 0.0000  | 0.0000  | 0.0000  |          |         |         |         |         |         |
|                      | Atomic coordinates |        |         | Mul.    | Lowdin  | Hirsch. | I-Hirsch | CM5     | ESP     | NPA     | AIM     | ACP     |
| 17                   | 0.0000             | 0.0000 | -2.4522 | -0.1372 | 0.3202  | -0.1654 | -0.4423  | -0.2943 | -0.1485 | -0.7196 | -0.8499 | -0.3328 |
| 4                    | 0.0000             | 0.0000 | -0.6660 | 0.2295  | -0.6521 | 0.2986  | 0.8480   | 0.5404  | 0.2816  | 1.3878  | 1.6794  | 0.6320  |
| 35                   | 0.0000             | 0.0000 | 1.2672  | -0.0923 | 0.3319  | -0.1332 | -0.4057  | -0.2461 | -0.1330 | -0.6681 | -0.8295 | -0.2992 |
| Dipole moment (in D) | 0.06 (DEN)         | 0.32   | 0.33    | 0.18    | 0.03    | 0.24    | 0.04     | 0.03    | 0.41    | 0.08    |         |         |

-----  
File mol200.out

Molecule 200 Be=CH2

SP Mol200 B3LYP/Def2TZVP VAC.

0 4

|                      |                    |         |         |         |         |         |          |         |         |         |         |         |
|----------------------|--------------------|---------|---------|---------|---------|---------|----------|---------|---------|---------|---------|---------|
| Dipole               | 1.2763             | 2.6141  | 0.0000  | 2.9090  |         |         |          |         |         |         |         |         |
| Quadrupole           | -3.7926            | 3.6713  | 0.1213  | 3.4466  | 0.0000  | 0.0000  |          |         |         |         |         |         |
|                      | Atomic coordinates |         |         | Mul.    | Lowdin  | Hirsch. | I-Hirsch | CM5     | ESP     | NPA     | AIM     | ACP     |
| 4                    | 0.0412             | 1.1213  | 0.0000  | 0.0675  | 0.2394  | 0.3076  | 0.7668   | 0.4399  | 0.4983  | 1.1926  | 1.2104  | 0.5005  |
| 6                    | 0.0412             | -0.4196 | 0.0000  | -0.2653 | -0.4958 | -0.3388 | -1.1332  | -0.5624 | -0.7983 | -1.6164 | -1.2776 | -0.6315 |
| 1                    | -0.2060            | -0.9838 | 0.8964  | 0.0989  | 0.1282  | 0.0156  | 0.1832   | 0.0613  | 0.1500  | 0.2119  | 0.0335  | 0.0655  |
| 1                    | -0.2060            | -0.9838 | -0.8964 | 0.0989  | 0.1282  | 0.0156  | 0.1832   | 0.0613  | 0.1500  | 0.2119  | 0.0335  | 0.0655  |
| Dipole moment (in D) | 2.91 (DEN)         | 0.24    | 1.12    | 2.19    | 4.70    | 2.93    | 2.90     | 7.69    | 8.78    | 3.35    |         |         |

File mol202.out

Molecule 202 BeFCH3

SP Mol202 B3LYP/Def2TZVP VAC.

0 6

Dipole 0.0000 0.0000 -1.2929 1.2929

Quadrupole 1.9789 1.9789 -3.9578 0.0000 0.0000 0.0000

|   | Atomic coordinates |         |         | Mul.    | Lowdin  | Hirsch. | I-Hirsch | CM5     | ESP     | NPA     | AIM     | ACP     |
|---|--------------------|---------|---------|---------|---------|---------|----------|---------|---------|---------|---------|---------|
| 9 | 0.0000             | 0.0000  | 1.5520  | -0.2783 | -0.1070 | -0.2815 | -0.6374  | -0.4448 | -0.4303 | -0.8497 | -0.8849 | -0.4269 |
| 4 | 0.0000             | 0.0000  | 0.1746  | 0.4126  | 0.1889  | 0.4327  | 1.2173   | 0.6962  | 0.7247  | 1.5884  | 1.7080  | 0.7495  |
| 6 | 0.0000             | 0.0000  | -1.4905 | -0.4546 | -0.4835 | -0.2417 | -1.0860  | -0.4780 | -0.7078 | -1.4411 | -0.8609 | -0.5704 |
| 1 | -1.0084            | 0.0000  | -1.9077 | 0.1068  | 0.1339  | 0.0301  | 0.1687   | 0.0755  | 0.1373  | 0.2341  | 0.0125  | 0.0826  |
| 1 | 0.5042             | 0.8733  | -1.9077 | 0.1068  | 0.1339  | 0.0301  | 0.1687   | 0.0755  | 0.1380  | 0.2341  | 0.0125  | 0.0826  |
| 1 | 0.5042             | -0.8733 | -1.9077 | 0.1068  | 0.1339  | 0.0301  | 0.1687   | 0.0755  | 0.1380  | 0.2341  | 0.0125  | 0.0826  |

Dipole moment (in D) 1.29 (DEN) 1.41 0.86 0.83 0.59 1.39 1.32 1.12 0.65 0.74

-----  
File mol203.out

Molecule 203 BeClCH3

SP Mol203 B3LYP/Def2TZVP VAC.

0 6

Dipole 0.0000 0.0000 -1.0519 1.0519

Quadrupole 1.0171 1.0171 -2.0343 0.0000 0.0000 0.0000

|    | Atomic coordinates |         |         | Mul.    | Lowdin  | Hirsch. | I-Hirsch | CM5     | ESP     | NPA     | AIM     | ACP     |
|----|--------------------|---------|---------|---------|---------|---------|----------|---------|---------|---------|---------|---------|
| 17 | 0.0000             | 0.0000  | 1.3180  | -0.2021 | 0.3026  | -0.1844 | -0.4896  | -0.3099 | -0.2478 | -0.7249 | -0.8598 | -0.3480 |
| 4  | 0.0000             | 0.0000  | -0.4790 | 0.2430  | -0.2138 | 0.3411  | 1.0373   | 0.5688  | 0.4156  | 1.4607  | 1.6943  | 0.6767  |
| 6  | 0.0000             | 0.0000  | -2.1370 | -0.3627 | -0.4924 | -0.2478 | -1.0496  | -0.4859 | -0.3457 | -1.4439 | -0.8724 | -0.5768 |
| 1  | 0.0000             | 1.0080  | -2.5561 | 0.1073  | 0.1345  | 0.0304  | 0.1673   | 0.0757  | 0.0592  | 0.2360  | 0.0127  | 0.0827  |
| 1  | 0.8730             | -0.5040 | -2.5561 | 0.1073  | 0.1345  | 0.0304  | 0.1673   | 0.0757  | 0.0593  | 0.2360  | 0.0127  | 0.0827  |
| 1  | -0.8730            | -0.5040 | -2.5561 | 0.1073  | 0.1345  | 0.0304  | 0.1673   | 0.0757  | 0.0594  | 0.2360  | 0.0127  | 0.0827  |

Dipole moment (in D) 1.05 (DEN) 2.07 2.51 0.53 0.87 1.07 1.16 1.82 0.86 0.88

-----  
File mol204.out

Molecule 204 BeBrCH3

SP Mol204 B3LYP/Def2TZVP VAC.

0 6

Dipole 0.0000 0.0000 -1.0461 1.0461

Quadrupole 0.4787 0.4787 -0.9574 0.0000 0.0000 0.0000

|    | Atomic coordinates |         |         | Mul.    | Lowdin  | Hirsch. | I-Hirsch | CM5     | ESP     | NPA     | AIM     | ACP     |
|----|--------------------|---------|---------|---------|---------|---------|----------|---------|---------|---------|---------|---------|
| 35 | 0.0000             | 0.0000  | 0.8648  | -0.1556 | 0.3148  | -0.1567 | -0.4395  | -0.2657 | -0.2164 | -0.6743 | -0.8424 | -0.3159 |
| 4  | 0.0000             | 0.0000  | -1.0833 | 0.1990  | -0.2273 | 0.3145  | 0.9769   | 0.5259  | 0.3867  | 1.4123  | 1.6772  | 0.6435  |
| 6  | 0.0000             | 0.0000  | -2.7419 | -0.3635 | -0.4914 | -0.2493 | -1.0398  | -0.4875 | -0.4315 | -1.4483 | -0.8742 | -0.5762 |
| 1  | -1.0081            | 0.0000  | -3.1611 | 0.1067  | 0.1346  | 0.0305  | 0.1675   | 0.0758  | 0.0866  | 0.2367  | 0.0132  | 0.0829  |
| 1  | 0.5040             | 0.8730  | -3.1611 | 0.1067  | 0.1346  | 0.0305  | 0.1675   | 0.0758  | 0.0873  | 0.2367  | 0.0132  | 0.0829  |
| 1  | 0.5040             | -0.8730 | -3.1611 | 0.1067  | 0.1346  | 0.0305  | 0.1675   | 0.0758  | 0.0873  | 0.2367  | 0.0132  | 0.0829  |

Dipole moment (in D) 1.05 (DEN) 1.76 2.83 0.39 0.84 0.87 1.19 1.86 1.31 0.85

-----  
File mol190.out

Molecule 190 BeCl+

SP Mol191 B3LYP/Def2TZVP VAC.

1 2

Dipole 0.0000 0.0000 -7.8512 7.8512

Quadrupole -5.5683 -5.5683 11.1365 0.0000 0.0000 0.0000

|    | Atomic coordinates |        |         | Mul.   | Lowdin | Hirsch. | I-Hirsch | CM5     | ESP     | NPA     | AIM     | ACP     |
|----|--------------------|--------|---------|--------|--------|---------|----------|---------|---------|---------|---------|---------|
| 17 | 0.0000             | 0.0000 | 0.3241  | 0.2371 | 0.5621 | 0.0582  | -0.4677  | -0.1004 | -0.1648 | -0.6393 | -0.7528 | -0.1571 |
| 4  | 0.0000             | 0.0000 | -1.3774 | 0.7629 | 0.4379 | 0.9418  | 1.4677   | 1.1004  | 1.1648  | 1.6393  | 1.7528  | 1.1571  |

Dipole moment (in D) 7.85 (DEN) 4.68 2.02 6.14 10.44 7.44 7.96 11.84 12.77 7.90

-----  
File mol192.out

Molecule 192 BeS

SP Mol192 B3LYP/Def2TZVP VAC.

0 2

Dipole 0.0000 0.0000 -5.1224 5.1224

Quadrupole -4.2318 -4.2318 8.4637 0.0000 0.0000 0.0000

|                      | Atomic coordinates |            |         | Mul.    | Lowdin  | Hirsch. | I-Hirsch | CM5     | ESP     | NPA     | AIM     | ACP     |
|----------------------|--------------------|------------|---------|---------|---------|---------|----------|---------|---------|---------|---------|---------|
| 16                   | 0.0000             | 0.0000     | 0.3442  | -0.1542 | 0.1311  | -0.3910 | -0.8723  | -0.5840 | -0.6524 | -1.2827 | -1.4659 | -0.6808 |
| 4                    | 0.0000             | 0.0000     | -1.3766 | 0.1542  | -0.1311 | 0.3910  | 0.8723   | 0.5840  | 0.6524  | 1.2827  | 1.4659  | 0.6808  |
| Dipole moment (in D) |                    | 5.12 (DEN) |         | 1.27    | 1.08    | 3.23    | 7.21     | 4.83    | 5.39    | 10.60   | 12.12   | 5.63    |

-----  
File mol193.out

Molecule 193 Be=NH

SP Mol193 B3LYP/Def2TZVP VAC.

0 3

Dipole 0.0000 0.0000 -3.8712 3.8712

Quadrupole -3.8997 -3.8997 7.7994 0.0000 0.0000 0.0000

|                      | Atomic coordinates |            |         | Mul.    | Lowdin  | Hirsch. | I-Hirsch | CM5     | ESP     | NPA     | AIM     | ACP     |
|----------------------|--------------------|------------|---------|---------|---------|---------|----------|---------|---------|---------|---------|---------|
| 4                    | 0.0000             | 0.0000     | -0.9708 | 0.0943  | 0.2201  | 0.4215  | 1.1616   | 0.7733  | 1.1444  | 1.6131  | 1.5954  | 0.7983  |
| 7                    | 0.0000             | 0.0000     | 0.3608  | -0.2870 | -0.3557 | -0.5067 | -1.5735  | -1.0460 | -1.8994 | -1.9699 | -1.9845 | -1.0304 |
| 1                    | 0.0000             | 0.0000     | 1.3576  | 0.1927  | 0.1356  | 0.0852  | 0.4119   | 0.2726  | 0.7549  | 0.3567  | 0.3890  | 0.2321  |
| Dipole moment (in D) |                    | 3.87 (DEN) |         | 0.32    | 0.76    | 2.29    | 5.46     | 3.64    | 3.70    | 8.61    | 8.34    | 3.99    |

-----  
File mol195.out

Molecule 195 Be=NF

SP Mol195 B3LYP/Def2TZVP VAC.

0 3

Dipole 0.0193 5.2169 0.0000 5.2169

Quadrupole -4.8873 9.7747 -4.8875 0.0511 0.0000 0.0000

|                      | Atomic coordinates |            |        | Mul.    | Lowdin  | Hirsch. | I-Hirsch | CM5     | ESP     | NPA     | AIM     | ACP     |
|----------------------|--------------------|------------|--------|---------|---------|---------|----------|---------|---------|---------|---------|---------|
| 7                    | 0.0000             | 0.3385     | 0.0000 | 0.0881  | -0.2402 | -0.3464 | -1.2077  | -0.7521 | -1.1248 | -1.2918 | -1.2066 | -0.7543 |
| 4                    | 0.0058             | 1.6534     | 0.0000 | 0.0535  | 0.1965  | 0.4346  | 1.1113   | 0.8058  | 0.9496  | 1.5362  | 1.5493  | 0.7979  |
| 9                    | -0.0026            | -0.9981    | 0.0000 | -0.1416 | 0.0437  | -0.0882 | 0.0964   | -0.0537 | 0.1753  | -0.2444 | -0.3426 | -0.0436 |
| Dipole moment (in D) |                    | 5.22 (DEN) |        | 1.25    | 0.96    | 3.31    | 6.40     | 5.43    | 4.87    | 11.27   | 11.99   | 5.32    |

-----



File Bex\_1.out

Molecule \_1 CH3BeH

SP Bex\_1 B3LYP/Def2TZVP VAC.

0 6

Dipole 0.0003 0.5946 0.0000 0.5946

Quadrupole 1.9700 -3.9398 1.9699 -0.0006 0.0000 0.0000

|   | Atomic coordinates |         |         | Mul.    | Lowdin  | Hirsch. | I-Hirsch | CM5     | ESP     | NPA     | AIM     | ACP     |
|---|--------------------|---------|---------|---------|---------|---------|----------|---------|---------|---------|---------|---------|
| 4 | 0.0000             | -1.0706 | 0.0000  | 0.1991  | 0.2155  | 0.3466  | 1.0182   | 0.4709  | 0.5783  | 1.3280  | 1.6841  | 0.6419  |
| 6 | 0.0000             | 0.6056  | 0.0000  | -0.4040 | -0.5099 | -0.2514 | -1.0023  | -0.4845 | -0.5216 | -1.4491 | -0.8702 | -0.5712 |
| 1 | -1.0149            | 1.0172  | 0.0000  | 0.1029  | 0.1315  | 0.0267  | 0.1595   | 0.0716  | 0.0882  | 0.2337  | 0.0081  | 0.0784  |
| 1 | 0.5075             | 1.0173  | 0.8789  | 0.1029  | 0.1315  | 0.0267  | 0.1595   | 0.0716  | 0.0894  | 0.2337  | 0.0081  | 0.0784  |
| 1 | 0.5075             | 1.0173  | -0.8789 | 0.1029  | 0.1315  | 0.0267  | 0.1595   | 0.0716  | 0.0894  | 0.2337  | 0.0081  | 0.0784  |
| 1 | -0.0002            | -2.4026 | 0.0000  | -0.1037 | -0.1001 | -0.1753 | -0.4944  | -0.2011 | -0.3237 | -0.5801 | -0.8383 | -0.3059 |

Dipole moment (in D) 0.59 (DEN) 0.51 0.49 0.10 0.11 0.46 0.55 0.92 1.40 0.28

-----  
File Bex\_2.out

Molecule \_2 BeH(CH=CH2)

SP Bex\_2 B3LYP/Def2TZVP VAC.

0 7

Dipole -0.7526 0.1944 0.0000 0.7773

Quadrupole -2.6987 2.7006 -0.0020 1.4337 0.0000 0.0000

|   | Atomic coordinates |         |        | Mul.    | Lowdin  | Hirsch. | I-Hirsch | CM5     | ESP     | NPA     | AIM     | ACP     |
|---|--------------------|---------|--------|---------|---------|---------|----------|---------|---------|---------|---------|---------|
| 1 | 2.8791             | -0.3726 | 0.0000 | -0.0922 | -0.0978 | -0.1734 | -0.4890  | -0.1993 | -0.3286 | -0.5764 | -0.8379 | -0.3049 |
| 4 | 1.6052             | 0.0094  | 0.0000 | 0.1535  | 0.2317  | 0.3351  | 0.9764   | 0.4646  | 0.6159  | 1.3214  | 1.6818  | 0.6140  |
| 6 | 0.0000             | 0.4699  | 0.0000 | -0.0614 | -0.3032 | -0.1955 | -0.7443  | -0.3434 | -0.4562 | -0.9559 | -0.8071 | -0.3924 |
| 1 | -0.2943            | 1.5209  | 0.0000 | 0.0927  | 0.1390  | 0.0280  | 0.1446   | 0.0783  | 0.1527  | 0.1991  | 0.0118  | 0.0757  |
| 6 | -1.0152            | -0.4043 | 0.0000 | -0.3113 | -0.2024 | -0.0607 | -0.0733  | -0.1695 | -0.2602 | -0.3386 | -0.0839 | -0.1588 |
| 1 | -0.8551            | -1.4792 | 0.0000 | 0.1120  | 0.1189  | 0.0323  | 0.0864   | 0.0835  | 0.1340  | 0.1730  | 0.0116  | 0.0829  |
| 1 | -2.0592            | -0.1003 | 0.0000 | 0.1068  | 0.1138  | 0.0341  | 0.0993   | 0.0857  | 0.1425  | 0.1774  | 0.0236  | 0.0836  |

Dipole moment (in D) 0.78 (DEN) 0.52 0.39 0.05 0.47 0.37 0.73 1.15 1.49 0.08  
-----

File Bex\_6.out

Molecule \_6 BeH(OH)

SP Bex\_6 B3LYP/Def2TZVP VAC.

0 4

Dipole 0.0000 0.0000 1.8156 1.8156

Quadrupole 0.2209 0.2209 -0.4418 0.0000 0.0000 0.0000

|   | Atomic coordinates |        |         | Mul.    | Lowdin  | Hirsch. | I-Hirsch | CM5     | ESP     | NPA     | AIM     | ACP     |
|---|--------------------|--------|---------|---------|---------|---------|----------|---------|---------|---------|---------|---------|
| 4 | 0.0000             | 0.0000 | -0.8630 | 0.2757  | 0.0991  | 0.3345  | 1.1852   | 0.5713  | 0.7082  | 1.4431  | 1.6818  | 0.6337  |
| 8 | 0.0000             | 0.0000 | 0.5220  | -0.4519 | -0.1739 | -0.3548 | -1.2100  | -0.7385 | -0.8726 | -1.3746 | -1.4971 | -0.6411 |
| 1 | 0.0000             | 0.0000 | -2.1904 | -0.1300 | -0.0990 | -0.1644 | -0.5253  | -0.1887 | -0.3266 | -0.5832 | -0.8243 | -0.2955 |
| 1 | 0.0000             | 0.0000 | 1.4668  | 0.3061  | 0.1738  | 0.1847  | 0.5500   | 0.3559  | 0.4910  | 0.5147  | 0.6395  | 0.3030  |

Dipole moment (in D) 1.82 (DEN) 1.25 1.42 0.75 1.45 0.27 1.77 0.33 2.45 1.01

-----  
File Bex\_7.out

Molecule \_7 BeCN(OH)

SP Bex\_7 B3LYP/Def2TZVP VAC.

0 5

Dipole 0.0000 0.0000 4.7504 4.7504

Quadrupole 0.8474 0.8474 -1.6949 0.0000 0.0000 0.0000

|   | Atomic coordinates |        |         | Mul.    | Lowdin  | Hirsch. | I-Hirsch | CM5     | ESP     | NPA     | AIM     | ACP     |
|---|--------------------|--------|---------|---------|---------|---------|----------|---------|---------|---------|---------|---------|
| 6 | 0.0000             | 0.0000 | -1.0328 | -0.2504 | -0.2412 | -0.0902 | -0.4775  | -0.0659 | -0.0447 | -0.4580 | 0.3156  | -0.0860 |
| 4 | 0.0000             | 0.0000 | 0.6283  | 0.3937  | 0.1217  | 0.4362  | 1.3282   | 0.7546  | 0.7985  | 1.6172  | 1.7271  | 0.7542  |
| 8 | 0.0000             | 0.0000 | 2.0048  | -0.4576 | -0.1317 | -0.3433 | -1.2608  | -0.7292 | -0.9425 | -1.3640 | -1.4873 | -0.6385 |
| 7 | 0.0000             | 0.0000 | -2.1864 | -0.0056 | 0.0686  | -0.1974 | -0.1569  | -0.3250 | -0.3440 | -0.3166 | -1.2055 | -0.3426 |
| 1 | 0.0000             | 0.0000 | 2.9506  | 0.3199  | 0.1826  | 0.1947  | 0.5669   | 0.3656  | 0.5327  | 0.5214  | 0.6503  | 0.3130  |

Dipole moment (in D) 4.75 (DEN) 2.62 2.16 3.29 3.92 4.18 4.72 4.73 11.20 4.59

-----  
File Bex\_9.out

Molecule \_9 BeH(NO2)

SP Bex\_9 B3LYP/Def2TZVP VAC.

0 5

Dipole 0.0000 0.0000 -2.7819 2.7819  
 Quadrupole 3.4225 -1.8288 -1.5937 0.0000 0.0000 0.0000

|   | Atomic coordinates |         |         | Mul.    | Lowdin  | Hirsch. | I-Hirsch | CM5     | ESP     | NPA     | AIM     | ACP     |
|---|--------------------|---------|---------|---------|---------|---------|----------|---------|---------|---------|---------|---------|
| 1 | 0.0000             | 0.0000  | -2.9320 | -0.0592 | -0.0849 | -0.1427 | -0.4699  | -0.1681 | -0.2349 | -0.5594 | -0.8170 | -0.2741 |
| 4 | 0.0000             | 0.0000  | -1.6166 | 0.3047  | 0.3159  | 0.4570  | 1.0047   | 0.6833  | 0.4822  | 1.3289  | 1.7024  | 0.7480  |
| 7 | 0.0000             | 0.0000  | 0.0077  | 0.3611  | -0.1799 | 0.1040  | 0.1623   | -0.1599 | 0.6334  | 0.0000  | 0.1197  | -0.0350 |
| 8 | 0.0000             | 1.0876  | 0.5840  | -0.3033 | -0.0256 | -0.2091 | -0.3486  | -0.1776 | -0.4403 | -0.3848 | -0.5026 | -0.2195 |
| 8 | 0.0000             | -1.0876 | 0.5840  | -0.3033 | -0.0256 | -0.2091 | -0.3486  | -0.1776 | -0.4403 | -0.3848 | -0.5026 | -0.2195 |

Dipole moment (in D) 2.78 (DEN) 3.22 1.41 2.71 3.13 3.94 2.88 4.60 4.53 3.18

-----  
 File Bex\_10.out

Molecule \_10 BeHF

SP Bex\_10 B3LYP/Def2TZVP VAC.

0 3

Dipole 0.0000 0.0000 -0.6805 0.6805  
 Quadrupole 1.6112 1.6112 -3.2224 0.0000 0.0000 0.0000

|   | Atomic coordinates |        |         | Mul.    | Lowdin  | Hirsch. | I-Hirsch | CM5     | ESP     | NPA     | AIM     | ACP     |
|---|--------------------|--------|---------|---------|---------|---------|----------|---------|---------|---------|---------|---------|
| 1 | 0.0000             | 0.0000 | -2.1131 | -0.1328 | -0.0951 | -0.1503 | -0.5017  | -0.1762 | -0.3069 | -0.5865 | -0.8103 | -0.2821 |
| 4 | 0.0000             | 0.0000 | -0.7886 | 0.3764  | 0.2148  | 0.4236  | 1.0988   | 0.6145  | 0.7076  | 1.4455  | 1.6905  | 0.6992  |
| 9 | 0.0000             | 0.0000 | 0.5853  | -0.2435 | -0.1197 | -0.2732 | -0.5971  | -0.4383 | -0.4006 | -0.8590 | -0.8802 | -0.4171 |

Dipole moment (in D) 0.68 (DEN) 0.76 0.19 0.85 0.75 1.77 0.69 1.94 0.65 0.96

-----  
 File Bex\_11.out

Molecule \_11 CH3BeF

SP Bex\_11 B3LYP/Def2TZVP VAC.

0 6

Dipole -0.0092 -1.2645 0.0000 1.2645  
 Quadrupole 2.0426 -4.0843 2.0417 -0.0322 0.0000 0.0000

|   | Atomic coordinates |         |        | Mul.    | Lowdin  | Hirsch. | I-Hirsch | CM5     | ESP     | NPA     | AIM     | ACP     |
|---|--------------------|---------|--------|---------|---------|---------|----------|---------|---------|---------|---------|---------|
| 4 | 0.0000             | 0.1777  | 0.0000 | 0.4115  | 0.1933  | 0.4326  | 1.2091   | 0.6915  | 0.7270  | 1.5842  | 1.7058  | 0.7450  |
| 6 | -0.0074            | -1.5022 | 0.0000 | -0.4552 | -0.4851 | -0.2397 | -1.0743  | -0.4718 | -0.7047 | -1.4336 | -0.8616 | -0.5636 |

|   |         |         |         |         |         |         |         |         |         |         |         |         |
|---|---------|---------|---------|---------|---------|---------|---------|---------|---------|---------|---------|---------|
| 1 | 1.0074  | -1.9098 | 0.0000  | 0.1067  | 0.1335  | 0.0297  | 0.1670  | 0.0749  | 0.1367  | 0.2332  | 0.0137  | 0.0818  |
| 1 | -0.5174 | -1.9040 | 0.8803  | 0.1067  | 0.1334  | 0.0297  | 0.1671  | 0.0748  | 0.1369  | 0.2332  | 0.0137  | 0.0817  |
| 1 | -0.5174 | -1.9040 | -0.8803 | 0.1067  | 0.1334  | 0.0297  | 0.1671  | 0.0748  | 0.1369  | 0.2332  | 0.0137  | 0.0817  |
| 9 | 0.0080  | 1.5578  | 0.0000  | -0.2765 | -0.1086 | -0.2820 | -0.6360 | -0.4442 | -0.4329 | -0.8502 | -0.8856 | -0.4266 |

Dipole moment (in D) 1.26 (DEN) 1.37 0.81 0.83 0.56 1.39 1.29 1.07 0.67 0.73

-----  
File Bex\_12.out

Molecule\_12 BeHCl

SP Bex\_12 B3LYP/Def2TZVP VAC.

0 3

Dipole 0.0000 0.0000 -0.3504 0.3504

Quadrupole 1.1268 1.1268 -2.2536 0.0000 0.0000 0.0000

|    | Atomic coordinates |        |         | Mul.    | Lowdin  | Hirsch. | I-Hirsch | CM5     | ESP     | NPA     | AIM     | ACP     |
|----|--------------------|--------|---------|---------|---------|---------|----------|---------|---------|---------|---------|---------|
| 1  | 0.0000             | 0.0000 | -2.6587 | -0.0999 | -0.0999 | -0.1564 | -0.4687  | -0.1827 | -0.2420 | -0.5653 | -0.8263 | -0.2884 |
| 4  | 0.0000             | 0.0000 | -1.3356 | 0.2372  | -0.1776 | 0.3296  | 0.9127   | 0.4789  | 0.4774  | 1.2901  | 1.6805  | 0.6198  |
| 17 | 0.0000             | 0.0000 | 0.4707  | -0.1373 | 0.2775  | -0.1732 | -0.4440  | -0.2962 | -0.2353 | -0.7248 | -0.8540 | -0.3314 |

Dipole moment (in D) 0.35 (DEN) 0.56 3.04 0.51 0.87 1.41 0.50 2.70 2.16 1.04

-----  
File Bex\_13.out

Molecule\_13 BeH(SH)

SP Bex\_13 B3LYP/Def2TZVP VAC.

0 4

Dipole -0.7407 0.0700 0.0000 0.7440

Quadrupole 3.6538 -3.4385 -0.2153 0.7562 0.0000 0.0000

|    | Atomic coordinates |         |        | Mul.    | Lowdin  | Hirsch. | I-Hirsch | CM5     | ESP     | NPA     | AIM     | ACP     |
|----|--------------------|---------|--------|---------|---------|---------|----------|---------|---------|---------|---------|---------|
| 4  | 0.0602             | 1.4141  | 0.0000 | 0.1700  | -0.1417 | 0.2896  | 0.8497   | 0.4404  | 0.4782  | 1.2378  | 1.6644  | 0.6270  |
| 16 | 0.0602             | -0.4911 | 0.0000 | -0.2037 | 0.1684  | -0.1831 | -0.5376  | -0.3700 | -0.3461 | -0.8297 | -0.8202 | -0.4656 |
| 1  | 0.0815             | 2.7403  | 0.0000 | -0.1048 | -0.1034 | -0.1647 | -0.4592  | -0.1907 | -0.2675 | -0.5685 | -0.8352 | -0.2946 |
| 1  | -1.2863            | -0.5389 | 0.0000 | 0.1385  | 0.0766  | 0.0582  | 0.1472   | 0.1203  | 0.1354  | 0.1605  | -0.0092 | 0.1332  |

Dipole moment (in D) 0.74 (DEN) 0.91 2.96 0.40 1.17 1.31 0.92 2.70 2.27 1.44

-----  
File Bex\_14.out

Molecule \_14 Be(OH)(SH)

SP Bex\_14 B3LYP/Def2TZVP VAC.

0 5

Dipole 1.2750 0.7104 1.1989 1.8888

Quadrupole -0.4353 1.5072 -1.0719 -1.7371 3.7804 0.0109

|    | Atomic coordinates |         |         | Mul.    | Lowdin  | Hirsch. | I-Hirsch | CM5     | ESP     | NPA     | AIM     | ACP     |
|----|--------------------|---------|---------|---------|---------|---------|----------|---------|---------|---------|---------|---------|
| 4  | 0.6447             | -0.0098 | -0.0094 | 0.2652  | -0.2281 | 0.3350  | 1.1546   | 0.6522  | 0.5466  | 1.5270  | 1.6962  | 0.7107  |
| 8  | 2.0563             | 0.0106  | -0.0865 | -0.4028 | -0.1869 | -0.3620 | -1.1635  | -0.7258 | -0.6648 | -1.3414 | -1.4648 | -0.6401 |
| 16 | -1.2725            | -0.0807 | 0.0072  | -0.2962 | 0.1608  | -0.1969 | -0.6395  | -0.3792 | -0.3759 | -0.8356 | -0.8162 | -0.4815 |
| 1  | 2.7238             | -0.0138 | 0.5951  | 0.2994  | 0.1830  | 0.1707  | 0.5030   | 0.3369  | 0.3637  | 0.4940  | 0.6015  | 0.2822  |
| 1  | -1.3923            | 1.2598  | 0.0194  | 0.1344  | 0.0713  | 0.0532  | 0.1454   | 0.1159  | 0.1304  | 0.1559  | -0.0167 | 0.1286  |

Dipole moment (in D) 1.89 (DEN) 2.14 1.77 0.90 2.64 1.65 2.03 2.96 4.36 2.14

-----  
Keywords:

File mol276.out

Molecule 276 NaF

SP Mol276 B3LYP/Def2TZVP VAC.

0 2

Dipole 0.0000 0.0000 7.8444 7.8444

Quadrupole -0.0068 -0.0068 0.0136 0.0000 0.0000 0.0000

|    | Atomic coordinates |        |         | Mul.    | Lowdin  | Hirsch. | I-Hirsch | CM5     | ESP     | NPA     | AIM     | ACP     |
|----|--------------------|--------|---------|---------|---------|---------|----------|---------|---------|---------|---------|---------|
| 9  | 0.0000             | 0.0000 | -1.0631 | -0.7407 | -0.5265 | -0.6232 | -0.9371  | -0.7806 | -0.8435 | -0.9396 | -0.9052 | -0.7051 |
| 11 | 0.0000             | 0.0000 | 0.8698  | 0.7407  | 0.5265  | 0.6232  | 0.9371   | 0.7806  | 0.8435  | 0.9396  | 0.9052  | 0.7051  |

Dipole moment (in D) 7.84 (DEN) 6.88 4.89 5.79 8.70 7.25 7.83 8.72 8.40 6.55

-----  
File mol278.out

Molecule 278 NaS

SP Mol278 B3LYP/Def2TZVP VAC.

```

0 2
Dipole      0.0000  0.0000 -8.0922  8.0922
Quadrupole -0.7536 -4.1373  4.8909  0.0000  0.0000  0.0000
      Atomic coordinates      Mul.      Lowdin      Hirsch.      I-Hirsch      CM5      ESP      NPA      AIM      ACP
11  0.0000  0.0000 -1.4823  0.5707  0.2062  0.4960  0.8054  0.6015  0.6760  0.8238  0.8215  0.6999
16  0.0000  0.0000  1.0191 -0.5707 -0.2062 -0.4960 -0.8054 -0.6015 -0.6760 -0.8238 -0.8214 -0.6999

Dipole moment (in D)  8.09 (DEN)  6.86  2.48  5.96  9.68  7.23  8.12  9.90  9.87  8.41

```

-----  
File mol279.out

Molecule 279 NaCl

SP Mol279 B3LYP/Def2TZVP VAC.

```

0 2
Dipole      0.0000  0.0000 -8.6220  8.6220
Quadrupole -2.8090 -2.8090  5.6180  0.0000  0.0000  0.0000
      Atomic coordinates      Mul.      Lowdin      Hirsch.      I-Hirsch      CM5      ESP      NPA      AIM      ACP
17  0.0000  0.0000  0.9317 -0.6471 -0.2585 -0.5784 -0.8959 -0.6889 -0.7629 -0.9093 -0.8835 -0.7245
11  0.0000  0.0000 -1.4398  0.6471  0.2585  0.5784  0.8959  0.6889  0.7629  0.9093  0.8836  0.7245

Dipole moment (in D)  8.62 (DEN)  7.37  2.94  6.59  10.21  7.85  8.69  10.36  10.06  8.25

```

-----  
File mol280.out

Molecule 280 NaBr

SP Mol280 B3LYP/Def2TZVP VAC.

```

0 2
Dipole      0.0000  0.0000 -8.8080  8.8080
Quadrupole -5.6374 -5.6374 11.2747  0.0000  0.0000  0.0000
      Atomic coordinates      Mul.      Lowdin      Hirsch.      I-Hirsch      CM5      ESP      NPA      AIM      ACP
35  0.0000  0.0000  0.6046 -0.6578 -0.2378 -0.5539 -0.8711 -0.6442 -0.7432 -0.9015 -0.8734 -0.7193
11  0.0000  0.0000 -1.9238  0.6578  0.2378  0.5539  0.8711  0.6442  0.7432  0.9015  0.8734  0.7193

Dipole moment (in D)  8.81 (DEN)  7.99  2.89  6.73  10.58  7.82  9.03  10.95  10.61  8.74

```

-----  
File mol281.out

Molecule 281 NaI

SP Mol281 B3LYP/Def2TZVP VAC.

0 2

Dipole 0.0000 0.0000 -8.9225 8.9225

Quadrupole -7.7987 -7.7987 15.5975 0.0000 0.0000 0.0000

|    | Atomic coordinates |        |         | Mul.    | Lowdin  | Hirsch. | I-Hirsch | CM5     | ESP     | NPA     | AIM     | ACP     |
|----|--------------------|--------|---------|---------|---------|---------|----------|---------|---------|---------|---------|---------|
| 53 | 0.0000             | 0.0000 | 0.4737  | -0.6016 | -0.2087 | -0.5335 | -0.8323  | -0.6004 | -0.6959 | -0.8742 | -0.8553 | -0.7016 |
| 11 | 0.0000             | 0.0000 | -2.2823 | 0.6016  | 0.2087  | 0.5335  | 0.8323   | 0.6004  | 0.6959  | 0.8742  | 0.8553  | 0.7016  |

Dipole moment (in D) 8.92 (DEN) 7.96 2.76 7.06 11.02 7.95 9.21 11.57 11.32 9.29

-----  
File mol282.out

Molecule 282 NaOH

SP Mol282 B3LYP/Def2TZVP VAC.

0 3

Dipole 0.0000 0.0000 6.1686 6.1686

Quadrupole -2.3173 -2.3173 4.6345 0.0000 0.0000 0.0000

|    | Atomic coordinates |        |         | Mul.    | Lowdin  | Hirsch. | I-Hirsch | CM5     | ESP     | NPA     | AIM     | ACP     |
|----|--------------------|--------|---------|---------|---------|---------|----------|---------|---------|---------|---------|---------|
| 11 | 0.0000             | 0.0000 | 0.9196  | 0.7195  | 0.4436  | 0.5795  | 1.0287   | 0.7888  | 0.9118  | 0.9572  | 0.9114  | 0.7029  |
| 8  | 0.0000             | 0.0000 | -1.0185 | -0.9841 | -0.5553 | -0.6423 | -1.4398  | -1.0221 | -1.4330 | -1.3935 | -1.4288 | -0.8294 |
| 1  | 0.0000             | 0.0000 | -1.9674 | 0.2646  | 0.1117  | 0.0629  | 0.4112   | 0.2334  | 0.5213  | 0.4362  | 0.5174  | 0.1266  |

Dipole moment (in D) 6.17 (DEN) 5.49 3.62 5.11 7.70 6.28 6.11 6.92 6.13 5.97

-----  
File mol283.out

Molecule 283 NaSH

SP Mol283 B3LYP/Def2TZVP VAC.

0 3

Dipole -0.4066 7.9872 0.0000 7.9975

Quadrupole -0.5885 5.2263 -4.6378 1.5344 0.0000 0.0000

|  | Atomic coordinates |  |  | Mul. | Lowdin | Hirsch. | I-Hirsch | CM5 | ESP | NPA | AIM | ACP |
|--|--------------------|--|--|------|--------|---------|----------|-----|-----|-----|-----|-----|
|--|--------------------|--|--|------|--------|---------|----------|-----|-----|-----|-----|-----|

|    |         |         |        |         |         |         |         |         |         |         |         |         |
|----|---------|---------|--------|---------|---------|---------|---------|---------|---------|---------|---------|---------|
| 11 | 0.0476  | 1.5165  | 0.0000 | 0.5598  | 0.2365  | 0.5072  | 0.8257  | 0.6167  | 0.6774  | 0.8306  | 0.8216  | 0.7203  |
| 16 | 0.0476  | -0.9736 | 0.0000 | -0.6590 | -0.2588 | -0.5016 | -0.9330 | -0.6757 | -0.7741 | -0.9462 | -0.7209 | -0.7715 |
| 1  | -1.2841 | -1.1034 | 0.0000 | 0.0992  | 0.0223  | -0.0056 | 0.1072  | 0.0590  | 0.0967  | 0.1156  | -0.1007 | 0.0512  |

Dipole moment (in D) 8.00 (DEN) 6.66 2.82 6.07 9.83 7.35 8.07 9.89 9.91 8.59

-----  
File mol285.out

Molecule 285 NaCH3

SP Mol285 B3LYP/Def2TZVP VAC.

0 5

Dipole -0.0006 5.6190 0.0000 5.6190

Quadrupole -0.8535 1.7068 -0.8533 -0.0004 0.0000 0.0000

|    | Atomic coordinates |         |         | Mul.    | Lowdin  | Hirsch. | I-Hirsch | CM5     | ESP     | NPA     | AIM     | ACP     |
|----|--------------------|---------|---------|---------|---------|---------|----------|---------|---------|---------|---------|---------|
| 6  | 0.0000             | -1.1966 | 0.0000  | -0.9521 | -0.7155 | -0.3559 | -1.0338  | -0.5691 | -1.3480 | -1.2422 | -0.5650 | -0.6356 |
| 1  | 1.0075             | -1.6307 | 0.0000  | 0.0994  | 0.0968  | -0.0261 | 0.1023   | 0.0197  | 0.2354  | 0.1779  | -0.0488 | 0.0041  |
| 1  | -0.5039            | -1.6303 | 0.8726  | 0.0994  | 0.0969  | -0.0261 | 0.1022   | 0.0197  | 0.2368  | 0.1779  | -0.0488 | 0.0041  |
| 1  | -0.5039            | -1.6303 | -0.8726 | 0.0994  | 0.0969  | -0.0261 | 0.1022   | 0.0197  | 0.2368  | 0.1779  | -0.0488 | 0.0041  |
| 11 | 0.0000             | 1.0974  | 0.0000  | 0.6538  | 0.4249  | 0.4342  | 0.7270   | 0.5099  | 0.6390  | 0.7085  | 0.7118  | 0.6234  |

Dipole moment (in D) 5.62 (DEN) 6.58 4.08 4.95 7.37 5.50 5.56 6.70 8.15 6.84

-----  
File mol288.out

Molecule 288 NaC2H

SP Mol288 B3LYP/Def2TZVP VAC.

0 4

Dipole 0.0000 0.0000 7.5493 7.5493

Quadrupole -5.0706 -5.0706 10.1413 0.0000 0.0000 0.0000

|    | Atomic coordinates |        |         | Mul.    | Lowdin  | Hirsch. | I-Hirsch | CM5     | ESP     | NPA     | AIM     | ACP     |
|----|--------------------|--------|---------|---------|---------|---------|----------|---------|---------|---------|---------|---------|
| 6  | 0.0000             | 0.0000 | -0.6205 | -0.3032 | -0.3390 | -0.4005 | -0.9196  | -0.4875 | -0.8969 | -0.6568 | -0.4538 | -0.5500 |
| 6  | 0.0000             | 0.0000 | -1.8463 | -0.6960 | -0.2612 | -0.2112 | -0.1393  | -0.2658 | -0.0763 | -0.4450 | -0.5142 | -0.2570 |
| 11 | 0.0000             | 0.0000 | 1.6104  | 0.8642  | 0.4962  | 0.5620  | 0.9078   | 0.6506  | 0.8147  | 0.8995  | 0.8621  | 0.7189  |
| 1  | 0.0000             | 0.0000 | -2.9134 | 0.1349  | 0.1040  | 0.0497  | 0.1511   | 0.1027  | 0.1585  | 0.2023  | 0.1059  | 0.0881  |



Dipole moment (in D) 7.55 (DEN) 11.87 5.71 6.72 8.88 7.41 7.43 10.03 11.10 8.25

-----  
File mol291.out

Molecule 291 NaC2H2F

SP Mol291 B3LYP/Def2TZVP VAC.

0 6

Dipole -6.5665 -1.1062 0.0023 6.6590

Quadrupole 10.7399 -5.9611 -4.7788 2.7783 -0.0006 -0.0008

|    | Atomic coordinates |         |         | Mul.    | Lowdin  | Hirsch. | I-Hirsch | CM5     | ESP     | NPA     | AIM     | ACP     |
|----|--------------------|---------|---------|---------|---------|---------|----------|---------|---------|---------|---------|---------|
| 6  | 0.5445             | -0.4200 | -0.0005 | -0.2502 | -0.2849 | -0.1957 | -0.4656  | -0.2734 | -0.7294 | -0.1489 | -0.1358 | -0.3107 |
| 6  | 1.8640             | -0.3174 | 0.0002  | -0.3902 | -0.3110 | -0.1570 | -0.3111  | -0.2556 | 0.0862  | -0.6088 | -0.1230 | -0.2539 |
| 11 | -1.7049            | -0.3731 | 0.0001  | 0.8224  | 0.4137  | 0.5529  | 0.9061   | 0.7283  | 0.7745  | 0.9031  | 0.8876  | 0.6633  |
| 9  | -0.0608            | 1.0162  | -0.0001 | -0.3727 | -0.0547 | -0.2534 | -0.3744  | -0.3588 | -0.2224 | -0.5434 | -0.6872 | -0.2278 |
| 1  | 2.4120             | 0.6188  | 0.0008  | 0.0942  | 0.1137  | 0.0278  | 0.1264   | 0.0811  | 0.0613  | 0.1948  | 0.0359  | 0.0639  |
| 1  | 2.4372             | -1.2361 | 0.0000  | 0.0964  | 0.1231  | 0.0254  | 0.1187   | 0.0785  | 0.0298  | 0.2033  | 0.0222  | 0.0653  |

Dipole moment (in D) 6.66 (DEN) 8.91 4.16 5.99 8.78 7.38 6.45 9.20 9.05 7.10

-----  
File mol293.out

Molecule 293 NaC2H6N

SP Mol293 B3LYP/Def2TZVP VAC.

0 10

Dipole 7.5115 0.0000 0.0000 7.5115

Quadrupole 10.2992 -4.5736 -5.7256 0.0000 0.0000 0.0000

|    | Atomic coordinates |         |         | Mul.    | Lowdin  | Hirsch. | I-Hirsch | CM5     | ESP     | NPA     | AIM     | ACP     |
|----|--------------------|---------|---------|---------|---------|---------|----------|---------|---------|---------|---------|---------|
| 11 | 1.9247             | -0.0000 | -0.0000 | 0.7104  | 0.4719  | 0.5576  | 0.9033   | 0.7827  | 0.8000  | 0.8949  | 0.8589  | 0.7711  |
| 7  | -0.1839            | -0.0000 | -0.0000 | -0.6853 | -0.2068 | -0.3606 | -1.0778  | -0.7568 | -0.9362 | -0.9352 | -1.2590 | -0.7373 |
| 6  | -1.0197            | 1.1607  | 0.0000  | -0.1770 | -0.3991 | -0.0820 | 0.0387   | -0.1704 | 0.0261  | -0.3934 | 0.3744  | -0.1423 |
| 6  | -1.0198            | -1.1607 | 0.0000  | -0.1770 | -0.3991 | -0.0820 | 0.0387   | -0.1704 | 0.0261  | -0.3934 | 0.3742  | -0.1423 |
| 1  | -1.6962            | -1.2276 | -0.8791 | 0.0565  | 0.0847  | -0.0089 | 0.0144   | 0.0487  | 0.0194  | 0.1298  | -0.0560 | 0.0398  |
| 1  | -1.6962            | -1.2276 | 0.8791  | 0.0565  | 0.0847  | -0.0089 | 0.0144   | 0.0487  | 0.0194  | 0.1298  | -0.0560 | 0.0398  |
| 1  | -0.4315            | -2.0874 | 0.0000  | 0.0513  | 0.0971  | 0.0013  | 0.0197   | 0.0601  | 0.0033  | 0.1539  | -0.0624 | 0.0460  |
| 1  | -1.6962            | 1.2277  | -0.8791 | 0.0565  | 0.0847  | -0.0089 | 0.0144   | 0.0487  | 0.0194  | 0.1298  | -0.0560 | 0.0398  |

|                      |            |        |         |        |        |         |        |        |        |        |         |        |
|----------------------|------------|--------|---------|--------|--------|---------|--------|--------|--------|--------|---------|--------|
| 1                    | -0.4315    | 2.0874 | -0.0000 | 0.0513 | 0.0971 | 0.0013  | 0.0197 | 0.0601 | 0.0033 | 0.1539 | -0.0624 | 0.0459 |
| 1                    | -1.6962    | 1.2277 | 0.8791  | 0.0565 | 0.0847 | -0.0089 | 0.0144 | 0.0487 | 0.0194 | 0.1298 | -0.0560 | 0.0398 |
| Dipole moment (in D) | 7.51 (DEN) | 6.85   | 5.29    | 6.56   | 8.37   | 7.74    | 7.32   | 8.08   | 7.47   | 7.69   |         |        |

-----  
File Nax\_5.out

Molecule \_5 (CH3)HNNa

SP Nax\_5 B3LYP/Def2TZVP VAC.

0 7

Dipole 6.4715 -1.3133 0.0580 6.6037

Quadrupole 7.3859 -1.7088 -5.6771 -2.1308 -0.2374 0.3116

|    | Atomic coordinates |         |         | Mul.    | Lowdin  | Hirsch. | I-Hirsch | CM5     | ESP     | NPA     | AIM     | ACP     |
|----|--------------------|---------|---------|---------|---------|---------|----------|---------|---------|---------|---------|---------|
| 7  | -0.3358            | 0.4727  | -0.0217 | -0.8677 | -0.3963 | -0.4493 | -1.2440  | -0.9372 | -1.5379 | -1.2286 | -1.3193 | -0.8841 |
| 6  | -1.5843            | -0.2633 | 0.0047  | -0.1566 | -0.4255 | -0.0868 | 0.0556   | -0.1801 | 0.6813  | -0.3797 | 0.3724  | -0.1413 |
| 11 | 1.6589             | -0.1537 | 0.0035  | 0.6861  | 0.4375  | 0.5280  | 0.8849   | 0.7532  | 0.8249  | 0.8871  | 0.8485  | 0.7474  |
| 1  | -0.5496            | 1.4620  | 0.0629  | 0.1571  | 0.1280  | 0.0258  | 0.2511   | 0.2100  | 0.4167  | 0.3096  | 0.2666  | 0.1449  |
| 1  | -2.1685            | -0.1537 | 0.9381  | 0.0637  | 0.0806  | -0.0098 | 0.0126   | 0.0466  | -0.1562 | 0.1316  | -0.0570 | 0.0415  |
| 1  | -1.3938            | -1.3399 | -0.0983 | 0.0518  | 0.0936  | 0.0003  | 0.0227   | 0.0591  | -0.1047 | 0.1462  | -0.0572 | 0.0475  |
| 1  | -2.2797            | -0.0068 | -0.8167 | 0.0654  | 0.0821  | -0.0081 | 0.0171   | 0.0485  | -0.1241 | 0.1339  | -0.0541 | 0.0441  |

Dipole moment (in D) 6.60 (DEN) 6.12 4.68 5.82 7.75 7.06 6.57 7.54 7.16 7.05

-----  
File Nax\_6.out

Molecule \_6 (CH3)2NNa

SP Nax\_6 B3LYP/Def2TZVP VAC.

0 10

Dipole -0.0001 -7.4233 0.0000 7.4233

Quadrupole -5.6807 10.1946 -4.5139 0.0003 0.0000 0.0000

|    | Atomic coordinates |         |         | Mul.    | Lowdin  | Hirsch. | I-Hirsch | CM5     | ESP     | NPA     | AIM     | ACP     |
|----|--------------------|---------|---------|---------|---------|---------|----------|---------|---------|---------|---------|---------|
| 7  | 0.0000             | 0.1877  | 0.0000  | -0.6912 | -0.2121 | -0.3621 | -1.0786  | -0.7588 | -0.9804 | -0.9381 | -1.2516 | -0.7395 |
| 11 | -0.0000            | -1.9153 | 0.0000  | 0.7067  | 0.4665  | 0.5533  | 0.9005   | 0.7816  | 0.8030  | 0.8935  | 0.8565  | 0.7689  |
| 6  | 0.0000             | 1.0154  | 1.1755  | -0.1754 | -0.3948 | -0.0817 | 0.0352   | -0.1711 | 0.0886  | -0.3941 | 0.3661  | -0.1427 |
| 6  | 0.0000             | 1.0154  | -1.1755 | -0.1754 | -0.3948 | -0.0817 | 0.0352   | -0.1711 | 0.0886  | -0.3941 | 0.3662  | -0.1427 |

|   |         |        |         |        |        |         |        |        |         |        |         |        |
|---|---------|--------|---------|--------|--------|---------|--------|--------|---------|--------|---------|--------|
| 1 | -0.8827 | 1.6871 | 1.2427  | 0.0577 | 0.0850 | -0.0082 | 0.0161 | 0.0492 | 0.0070  | 0.1310 | -0.0542 | 0.0406 |
| 1 | 0.8827  | 1.6871 | 1.2426  | 0.0577 | 0.0850 | -0.0082 | 0.0161 | 0.0493 | 0.0067  | 0.1310 | -0.0542 | 0.0406 |
| 1 | 0.0001  | 0.4108 | 2.0918  | 0.0522 | 0.0977 | 0.0025  | 0.0216 | 0.0612 | -0.0137 | 0.1545 | -0.0601 | 0.0469 |
| 1 | -0.8827 | 1.6871 | -1.2427 | 0.0577 | 0.0850 | -0.0082 | 0.0161 | 0.0492 | 0.0070  | 0.1310 | -0.0542 | 0.0406 |
| 1 | 0.8827  | 1.6871 | -1.2426 | 0.0577 | 0.0850 | -0.0082 | 0.0161 | 0.0493 | 0.0067  | 0.1310 | -0.0542 | 0.0406 |
| 1 | 0.0001  | 0.4108 | -2.0918 | 0.0522 | 0.0977 | 0.0025  | 0.0216 | 0.0612 | -0.0137 | 0.1545 | -0.0601 | 0.0469 |

Dipole moment (in D) 7.42 (DEN) 6.76 5.19 6.47 8.31 7.71 7.24 8.05 7.43 7.63

-----  
File Nax\_7.out

Molecule\_7 CH3-ONa

SP Nax\_7 B3LYP/Def2TZVP VAC.

0 6

Dipole 0.0136 -7.4193 0.0000 7.4193

Quadrupole -4.1870 8.3746 -4.1875 -0.0261 0.0000 0.0000

|    | Atomic coordinates |         |         | Mul.    | Lowdin  | Hirsch. | I-Hirsch | CM5     | ESP     | NPA     | AIM     | ACP     |
|----|--------------------|---------|---------|---------|---------|---------|----------|---------|---------|---------|---------|---------|
| 8  | 0.0000             | 0.2761  | 0.0000  | -0.7893 | -0.2408 | -0.5135 | -1.1941  | -0.7748 | -1.0885 | -1.0922 | -1.3496 | -0.6710 |
| 6  | -0.0038            | 1.6479  | 0.0000  | -0.0771 | -0.4649 | -0.0592 | 0.1857   | -0.1774 | 0.5597  | -0.1923 | 0.6234  | -0.1312 |
| 1  | -0.5147            | 2.0821  | 0.8827  | 0.0420  | 0.0749  | -0.0116 | -0.0003  | 0.0445  | -0.1107 | 0.1108  | -0.0609 | 0.0272  |
| 1  | -0.5147            | 2.0821  | -0.8827 | 0.0420  | 0.0749  | -0.0116 | -0.0003  | 0.0445  | -0.1107 | 0.1108  | -0.0609 | 0.0272  |
| 1  | 1.0143             | 2.0863  | 0.0000  | 0.0420  | 0.0749  | -0.0116 | -0.0002  | 0.0445  | -0.1128 | 0.1108  | -0.0609 | 0.0272  |
| 11 | 0.0035             | -1.6679 | 0.0000  | 0.7403  | 0.4810  | 0.6077  | 1.0093   | 0.8188  | 0.8629  | 0.9520  | 0.9088  | 0.7205  |

Dipole moment (in D) 7.42 (DEN) 6.33 5.60 6.37 8.21 7.66 7.27 7.27 5.96 6.88

-----  
File Nax\_10.out

Molecule\_10 Na(OH)

SP Nax\_10 B3LYP/Def2TZVP VAC.

0 3

Dipole -0.0003 -6.1479 0.0000 6.1479

Quadrupole -2.3186 4.6372 -2.3186 -0.0017 0.0000 0.0000

|    | Atomic coordinates |         |        | Mul.   | Lowdin | Hirsch. | I-Hirsch | CM5    | ESP    | NPA    | AIM    | ACP    |
|----|--------------------|---------|--------|--------|--------|---------|----------|--------|--------|--------|--------|--------|
| 11 | 0.0000             | -0.9176 | 0.0000 | 0.7196 | 0.4420 | 0.5787  | 1.0289   | 0.7906 | 0.9115 | 0.9576 | 0.9110 | 0.7025 |

|                      |            |        |        |         |         |         |         |         |         |         |         |         |
|----------------------|------------|--------|--------|---------|---------|---------|---------|---------|---------|---------|---------|---------|
| 8                    | 0.0000     | 1.0154 | 0.0000 | -0.9848 | -0.5572 | -0.6421 | -1.4386 | -1.0223 | -1.4306 | -1.3944 | -1.4244 | -0.8278 |
| 1                    | -0.0003    | 1.9697 | 0.0000 | 0.2652  | 0.1151  | 0.0634  | 0.4097  | 0.2318  | 0.5191  | 0.4368  | 0.5135  | 0.1254  |
| Dipole moment (in D) | 6.15 (DEN) | 5.47   | 3.58   | 5.08    | 7.68    | 6.28    | 6.08    | 6.89    | 6.10    | 5.95    |         |         |

-----  
File Nax\_12.out

Molecule\_12 NaS

SP Nax\_12 B3LYP/Def2TZVP VAC.

0 2

|                      |                    |         |         |         |         |         |          |         |         |         |         |         |
|----------------------|--------------------|---------|---------|---------|---------|---------|----------|---------|---------|---------|---------|---------|
| Dipole               | 0.0000             | 0.0000  | -8.0606 | 8.0606  |         |         |          |         |         |         |         |         |
| Quadrupole           | -0.7326            | -4.1161 | 4.8487  | 0.0000  | 0.0000  | 0.0000  |          |         |         |         |         |         |
|                      | Atomic coordinates |         |         | Mul.    | Lowdin  | Hirsch. | I-Hirsch | CM5     | ESP     | NPA     | AIM     | ACP     |
| 11                   | 0.0000             | 0.0000  | -1.4759 | 0.5721  | 0.2024  | 0.4951  | 0.8063   | 0.6035  | 0.6762  | 0.8246  | 0.8211  | 0.7004  |
| 16                   | 0.0000             | 0.0000  | 1.0147  | -0.5721 | -0.2024 | -0.4951 | -0.8062  | -0.6035 | -0.6762 | -0.8246 | -0.8211 | -0.7004 |
| Dipole moment (in D) | 8.06 (DEN)         | 6.84    | 2.42    | 5.92    | 9.65    | 7.22    | 8.09     | 9.86    | 9.82    | 8.38    |         |         |

-----  
File Nax\_13.out

Molecule\_13 Na+CH3

SP Nax\_13 B3LYP/Def2TZVP VAC.

1 5

|                      |                    |         |         |         |         |         |          |         |         |         |         |         |
|----------------------|--------------------|---------|---------|---------|---------|---------|----------|---------|---------|---------|---------|---------|
| Dipole               | 0.0002             | 4.2673  | 0.0000  | 4.2673  |         |         |          |         |         |         |         |         |
| Quadrupole           | -3.0235            | 6.0457  | -3.0222 | 0.0008  | 0.0000  | 0.0000  |          |         |         |         |         |         |
|                      | Atomic coordinates |         |         | Mul.    | Lowdin  | Hirsch. | I-Hirsch | CM5     | ESP     | NPA     | AIM     | ACP     |
| 11                   | -0.0000            | 1.2231  | 0.0000  | 0.8810  | 0.7786  | 0.8269  | 0.9846   | 0.8575  | 0.8987  | 0.9756  | 0.9536  | 0.9082  |
| 6                    | -0.0000            | -1.4559 | 0.0000  | -0.4409 | -0.1571 | -0.0328 | -0.4480  | -0.2065 | -0.4697 | -0.5516 | -0.2392 | -0.2577 |
| 1                    | 1.0769             | -1.5722 | 0.0000  | 0.1866  | 0.1262  | 0.0686  | 0.1544   | 0.1163  | 0.1896  | 0.1919  | 0.0951  | 0.1165  |
| 1                    | -0.5382            | -1.5735 | 0.9326  | 0.1867  | 0.1262  | 0.0687  | 0.1545   | 0.1164  | 0.1907  | 0.1920  | 0.0952  | 0.1165  |
| 1                    | -0.5382            | -1.5735 | -0.9326 | 0.1867  | 0.1262  | 0.0687  | 0.1545   | 0.1164  | 0.1907  | 0.1920  | 0.0952  | 0.1165  |
| Dipole moment (in D) | 4.27 (DEN)         | 4.03    | 2.81    | 3.53    | 5.42    | 3.84    | 4.25     | 5.24    | 5.12    | 4.50    |         |         |

File Nax\_14.out

Molecule \_14 Na+C2H5

SP Nax\_14 B3LYP/Def2TZVP VAC.

1 8

Dipole -6.2449 -0.7222 0.0000 6.2865

Quadrupole 11.9117 -5.9236 -5.9881 1.5768 0.0000 0.0000

|    | Atomic coordinates |         |         | Mul.    | Lowdin  | Hirsch. | I-Hirsch | CM5     | ESP     | NPA     | AIM     | ACP     |
|----|--------------------|---------|---------|---------|---------|---------|----------|---------|---------|---------|---------|---------|
| 6  | 1.5995             | -0.4309 | 0.0000  | -0.2957 | -0.3117 | -0.0651 | -0.3919  | -0.2166 | 0.0032  | -0.6940 | -0.0029 | -0.2340 |
| 6  | 0.6418             | 0.6996  | 0.0000  | -0.4150 | -0.1659 | -0.0299 | -0.2716  | -0.1693 | -0.3668 | -0.3789 | -0.2175 | -0.1882 |
| 1  | 0.4626             | 1.2473  | 0.9219  | 0.1833  | 0.1412  | 0.0548  | 0.1125   | 0.1045  | 0.1347  | 0.1883  | 0.0573  | 0.0953  |
| 1  | 1.5248             | -1.0541 | -0.8930 | 0.1424  | 0.1384  | 0.0546  | 0.1398   | 0.1053  | 0.0265  | 0.2285  | 0.0394  | 0.1038  |
| 1  | 1.5249             | -1.0541 | 0.8930  | 0.1424  | 0.1384  | 0.0546  | 0.1398   | 0.1053  | 0.0265  | 0.2285  | 0.0394  | 0.1038  |
| 1  | 2.6273             | -0.0317 | -0.0000 | 0.1830  | 0.1641  | 0.0767  | 0.1865   | 0.1267  | 0.1471  | 0.2696  | 0.0845  | 0.1280  |
| 1  | 0.4626             | 1.2473  | -0.9219 | 0.1833  | 0.1412  | 0.0548  | 0.1125   | 0.1045  | 0.1347  | 0.1883  | 0.0573  | 0.0953  |
| 11 | -1.8228            | -0.1788 | 0.0000  | 0.8763  | 0.7541  | 0.7995  | 0.9725   | 0.8395  | 0.8942  | 0.9699  | 0.9426  | 0.8962  |

Dipole moment (in D) 6.29 (DEN) 6.07 4.79 5.61 7.53 5.97 6.13 7.45 7.16 6.72

-----  
File Nax\_15.out

Molecule \_15 Na+C2H3

SP Nax\_15 B3LYP/Def2TZVP VAC.

1 6

Dipole -5.1297 -0.6823 0.6589 5.2167

Quadrupole 8.9916 -2.9669 -6.0247 0.1784 0.9661 1.0433

|    | Atomic coordinates |         |         | Mul.    | Lowdin  | Hirsch. | I-Hirsch | CM5     | ESP     | NPA     | AIM     | ACP     |
|----|--------------------|---------|---------|---------|---------|---------|----------|---------|---------|---------|---------|---------|
| 6  | 1.3568             | -0.4831 | 0.0182  | -0.2024 | -0.1601 | -0.0226 | -0.2799  | -0.1344 | -0.1815 | -0.4878 | -0.0542 | -0.1460 |
| 6  | 0.8511             | 0.7101  | -0.1531 | -0.2374 | -0.0483 | -0.0228 | -0.2502  | -0.1157 | -0.2710 | -0.1914 | -0.2817 | -0.1325 |
| 1  | 1.2114             | -1.3005 | -0.6859 | 0.1896  | 0.1590  | 0.0810  | 0.1649   | 0.1322  | 0.1700  | 0.2341  | 0.0982  | 0.1226  |
| 1  | 1.9981             | -0.7085 | 0.8749  | 0.1922  | 0.1660  | 0.0912  | 0.1964   | 0.1424  | 0.1827  | 0.2530  | 0.1271  | 0.1388  |
| 1  | 0.9618             | 1.6981  | 0.2746  | 0.2159  | 0.1555  | 0.0950  | 0.1916   | 0.1458  | 0.2302  | 0.2139  | 0.1619  | 0.1389  |
| 11 | -1.5835            | -0.0956 | 0.0314  | 0.8421  | 0.7278  | 0.7781  | 0.9772   | 0.8297  | 0.8696  | 0.9782  | 0.9486  | 0.8782  |

Dipole moment (in D) 5.22 (DEN) 4.87 3.60 4.41 6.65 4.92 5.21 6.70 6.31 5.55

-----  
File Nax\_18.out

Molecule \_18 Na+propyne

SP Nax\_18 B3LYP/Def2TZVP VAC.

1 8

Dipole 5.9023 -2.6185 0.0001 6.4571

Quadrupole 12.7175 -3.1628 -9.5547 -2.1644 -0.0001 0.0001

|    | Atomic coordinates |         |         | Mul.    | Lowdin  | Hirsch. | I-Hirsch | CM5     | ESP     | NPA     | AIM     | ACP     |
|----|--------------------|---------|---------|---------|---------|---------|----------|---------|---------|---------|---------|---------|
| 6  | 0.0848             | 1.2842  | -0.0000 | -0.2637 | -0.0588 | -0.0873 | -0.4965  | -0.1771 | -0.6325 | -0.3665 | -0.2090 | -0.2020 |
| 6  | -0.7402            | 0.4033  | 0.0000  | 0.0480  | -0.0716 | 0.0156  | 0.1610   | -0.0215 | 0.2662  | 0.0304  | -0.2593 | 0.0042  |
| 1  | 0.6735             | 2.1749  | 0.0000  | 0.2396  | 0.1660  | 0.1149  | 0.2537   | 0.1672  | 0.3693  | 0.2681  | 0.2049  | 0.1576  |
| 6  | -1.7960            | -0.5996 | -0.0000 | -0.3772 | -0.2374 | -0.0366 | -0.4282  | -0.1820 | -0.4800 | -0.6970 | 0.0673  | -0.2094 |
| 1  | -1.7552            | -1.2299 | -0.8899 | 0.1685  | 0.1532  | 0.0705  | 0.1639   | 0.1219  | 0.1615  | 0.2517  | 0.0725  | 0.1193  |
| 1  | -1.7541            | -1.2312 | 0.8889  | 0.1684  | 0.1532  | 0.0704  | 0.1639   | 0.1219  | 0.1614  | 0.2517  | 0.0725  | 0.1193  |
| 1  | -2.7623            | -0.0900 | 0.0010  | 0.1932  | 0.1676  | 0.0858  | 0.1974   | 0.1377  | 0.2649  | 0.2774  | 0.1062  | 0.1372  |
| 11 | 1.8460             | -0.5592 | 0.0000  | 0.8233  | 0.7278  | 0.7667  | 0.9849   | 0.8318  | 0.8893  | 0.9843  | 0.9450  | 0.8738  |

Dipole moment (in D) 6.46 (DEN) 6.07 4.86 5.50 7.92 6.18 6.32 8.06 7.43 6.75

-----  
File Nax\_19.out

Molecule \_19 Na(NH3)+

SP Nax\_19 B3LYP/Def2TZVP VAC.

1 5

Dipole 0.0020 -2.6762 0.0000 2.6762

Quadrupole -3.4761 6.9526 -3.4766 -0.0002 0.0000 0.0000

|    | Atomic coordinates |         |         | Mul.    | Lowdin  | Hirsch. | I-Hirsch | CM5     | ESP     | NPA     | AIM     | ACP     |
|----|--------------------|---------|---------|---------|---------|---------|----------|---------|---------|---------|---------|---------|
| 11 | -0.0001            | -1.1756 | 0.0000  | 0.9183  | 0.7286  | 0.7874  | 1.0027   | 0.9052  | 0.9391  | 0.9816  | 0.9475  | 0.9119  |
| 7  | -0.0001            | 1.1720  | 0.0000  | -0.7648 | -0.2514 | -0.2030 | -1.1526  | -0.8570 | -1.1455 | -1.1521 | -1.1183 | -0.7033 |
| 1  | -0.9343            | 1.5770  | 0.0000  | 0.2822  | 0.1743  | 0.1386  | 0.3834   | 0.3173  | 0.4021  | 0.3902  | 0.3903  | 0.2639  |
| 1  | 0.4678             | 1.5753  | 0.8095  | 0.2822  | 0.1742  | 0.1385  | 0.3833   | 0.3173  | 0.4022  | 0.3901  | 0.3902  | 0.2638  |
| 1  | 0.4678             | 1.5753  | -0.8095 | 0.2822  | 0.1742  | 0.1385  | 0.3833   | 0.3173  | 0.4022  | 0.3901  | 0.3902  | 0.2638  |

Dipole moment (in D) 2.68 (DEN) 3.08 1.57 2.44 3.45 2.73 2.62 3.17 2.78 3.12

-----  
File Nax\_20.out

Molecule \_20 Na+N(CH3)H2

SP Nax\_20 B3LYP/Def2TZVP VAC.

1 8

Dipole 4.0463 -3.1903 0.0000 5.1527

Quadrupole 2.2236 3.1408 -5.3645 -7.4413 0.0000 0.0000

|    | Atomic coordinates |         |         | Mul.    | Lowdin  | Hirsch. | I-Hirsch | CM5     | ESP     | NPA     | AIM     | ACP     |
|----|--------------------|---------|---------|---------|---------|---------|----------|---------|---------|---------|---------|---------|
| 11 | 1.2658             | -1.1945 | 0.0000  | 0.8972  | 0.7195  | 0.7705  | 0.9972   | 0.8955  | 0.9175  | 0.9778  | 0.9424  | 0.9054  |
| 7  | 0.0000             | 0.7796  | 0.0000  | -0.6461 | -0.1348 | -0.1715 | -0.9654  | -0.7328 | -0.9798 | -0.9276 | -1.0787 | -0.6233 |
| 6  | -1.4757            | 0.5738  | 0.0000  | -0.2424 | -0.3144 | -0.0163 | -0.1156  | -0.1235 | 0.2319  | -0.4122 | 0.2787  | -0.1165 |
| 1  | 0.2429             | 1.3560  | 0.8029  | 0.2654  | 0.1804  | 0.1284  | 0.3548   | 0.3116  | 0.3728  | 0.3768  | 0.3697  | 0.2496  |
| 1  | 0.2429             | 1.3560  | -0.8029 | 0.2654  | 0.1804  | 0.1284  | 0.3548   | 0.3116  | 0.3728  | 0.3768  | 0.3697  | 0.2496  |
| 1  | -2.0277            | 1.5143  | 0.0000  | 0.1658  | 0.1209  | 0.0558  | 0.1328   | 0.1142  | 0.0448  | 0.2076  | 0.0509  | 0.1174  |
| 1  | -1.7640            | 0.0065  | 0.8842  | 0.1474  | 0.1240  | 0.0523  | 0.1207   | 0.1116  | 0.0200  | 0.2004  | 0.0335  | 0.1090  |
| 1  | -1.7640            | 0.0065  | -0.8842 | 0.1474  | 0.1240  | 0.0523  | 0.1207   | 0.1116  | 0.0200  | 0.2004  | 0.0335  | 0.1090  |

Dipole moment (in D) 5.15 (DEN) 5.12 4.38 4.76 5.97 5.23 5.09 5.75 4.98 5.42

-----  
File Nax\_21.out

Molecule \_21 Na+N(CH3)2H

SP Nax\_21 B3LYP/Def2TZVP VAC.

1 11

Dipole 0.0453 -6.1142 0.0000 6.1144

Quadrupole -6.0273 11.5935 -5.5662 -1.6944 0.0000 0.0000

|    | Atomic coordinates |         |         | Mul.    | Lowdin  | Hirsch. | I-Hirsch | CM5     | ESP     | NPA     | AIM     | ACP     |
|----|--------------------|---------|---------|---------|---------|---------|----------|---------|---------|---------|---------|---------|
| 11 | 0.1144             | -1.9637 | 0.0000  | 0.8822  | 0.7054  | 0.7549  | 0.9844   | 0.8884  | 0.9087  | 0.9772  | 0.9400  | 0.9004  |
| 7  | -0.3906            | 0.3269  | 0.0000  | -0.5140 | -0.0442 | -0.1358 | -0.6845  | -0.6061 | -0.7010 | -0.7160 | -1.0518 | -0.5319 |
| 1  | -1.4019            | 0.4351  | 0.0000  | 0.2437  | 0.1916  | 0.1215  | 0.3175   | 0.3100  | 0.3711  | 0.3714  | 0.3567  | 0.2387  |
| 6  | 0.1144             | 0.9928  | 1.2232  | -0.2536 | -0.3005 | -0.0226 | -0.1657  | -0.1269 | -0.0918 | -0.4208 | 0.2799  | -0.1241 |
| 6  | 0.1144             | 0.9928  | -1.2232 | -0.2536 | -0.3005 | -0.0226 | -0.1657  | -0.1269 | -0.0918 | -0.4208 | 0.2800  | -0.1241 |
| 1  | -0.1034            | 2.0646  | 1.2266  | 0.1577  | 0.1226  | 0.0520  | 0.1281   | 0.1113  | 0.1279  | 0.2029  | 0.0430  | 0.1110  |
| 1  | 1.1967             | 0.8712  | 1.2875  | 0.1424  | 0.1260  | 0.0489  | 0.1139   | 0.1089  | 0.1014  | 0.1965  | 0.0254  | 0.1029  |
| 1  | -0.3412            | 0.5461  | 2.1072  | 0.1476  | 0.1254  | 0.0513  | 0.1150   | 0.1106  | 0.0732  | 0.2051  | 0.0292  | 0.1066  |

|   |         |        |         |        |        |        |        |        |        |        |        |        |
|---|---------|--------|---------|--------|--------|--------|--------|--------|--------|--------|--------|--------|
| 1 | -0.1034 | 2.0646 | -1.2266 | 0.1577 | 0.1226 | 0.0520 | 0.1281 | 0.1113 | 0.1279 | 0.2029 | 0.0430 | 0.1110 |
| 1 | 1.1967  | 0.8712 | -1.2875 | 0.1424 | 0.1260 | 0.0489 | 0.1139 | 0.1089 | 0.1014 | 0.1965 | 0.0254 | 0.1029 |
| 1 | -0.3412 | 0.5461 | -2.1072 | 0.1476 | 0.1254 | 0.0513 | 0.1150 | 0.1106 | 0.0732 | 0.2051 | 0.0292 | 0.1066 |

Dipole moment (in D) 6.11 (DEN) 5.97 5.05 5.59 7.19 6.20 6.00 6.84 5.91 6.41

-----  
File Nax\_22.out

Molecule \_22 Na+N(CH3)3

SP Nax\_22 B3LYP/Def2TZVP VAC.

1 14

Dipole 6.6819 0.0044 0.0000 6.6819

Quadrupole 12.6719 -6.3365 -6.3354 0.0134 0.0000 0.0000

|    | Atomic coordinates |         |         | Mul.    | Lowdin  | Hirsch. | I-Hirsch | CM5     | ESP     | NPA     | AIM     | ACP     |
|----|--------------------|---------|---------|---------|---------|---------|----------|---------|---------|---------|---------|---------|
| 11 | 2.0917             | 0.0012  | 0.0000  | 0.8718  | 0.6882  | 0.7411  | 0.9724   | 0.8840  | 0.8994  | 0.9808  | 0.9395  | 0.8970  |
| 7  | -0.2557            | -0.0005 | 0.0000  | -0.4130 | 0.0188  | -0.0979 | -0.3211  | -0.4773 | -0.2985 | -0.5184 | -1.0335 | -0.4323 |
| 6  | -0.7436            | -1.3945 | 0.0000  | -0.2575 | -0.2831 | -0.0268 | -0.2311  | -0.1285 | -0.3404 | -0.4255 | 0.2806  | -0.1303 |
| 6  | -0.7436            | 0.6968  | 1.2073  | -0.2574 | -0.2829 | -0.0268 | -0.2312  | -0.1285 | -0.2885 | -0.4255 | 0.2803  | -0.1304 |
| 6  | -0.7436            | 0.6968  | -1.2073 | -0.2574 | -0.2829 | -0.0268 | -0.2312  | -0.1285 | -0.2885 | -0.4255 | 0.2804  | -0.1304 |
| 1  | -1.8393            | -1.4377 | 0.0000  | 0.1532  | 0.1256  | 0.0493  | 0.1268   | 0.1093  | 0.1837  | 0.2001  | 0.0383  | 0.1059  |
| 1  | -0.3859            | -1.9180 | 0.8877  | 0.1423  | 0.1275  | 0.0482  | 0.1103   | 0.1084  | 0.1404  | 0.2023  | 0.0229  | 0.1014  |
| 1  | -0.3859            | -1.9180 | -0.8877 | 0.1423  | 0.1275  | 0.0482  | 0.1103   | 0.1084  | 0.1404  | 0.2023  | 0.0229  | 0.1014  |
| 1  | -1.8392            | 0.7194  | 1.2438  | 0.1533  | 0.1256  | 0.0493  | 0.1268   | 0.1093  | 0.1725  | 0.2002  | 0.0383  | 0.1059  |
| 1  | -0.3848            | 1.7269  | 1.2171  | 0.1422  | 0.1275  | 0.0482  | 0.1102   | 0.1084  | 0.1249  | 0.2022  | 0.0228  | 0.1014  |
| 1  | -0.3875            | 0.1888  | 2.1046  | 0.1424  | 0.1275  | 0.0483  | 0.1104   | 0.1085  | 0.1286  | 0.2023  | 0.0230  | 0.1015  |
| 1  | -1.8392            | 0.7194  | -1.2438 | 0.1533  | 0.1256  | 0.0493  | 0.1268   | 0.1093  | 0.1725  | 0.2002  | 0.0383  | 0.1059  |
| 1  | -0.3875            | 0.1888  | -2.1046 | 0.1424  | 0.1275  | 0.0483  | 0.1104   | 0.1085  | 0.1286  | 0.2023  | 0.0230  | 0.1015  |
| 1  | -0.3848            | 1.7269  | -1.2171 | 0.1422  | 0.1275  | 0.0482  | 0.1102   | 0.1084  | 0.1249  | 0.2022  | 0.0228  | 0.1014  |

Dipole moment (in D) 6.68 (DEN) 6.38 5.18 6.01 8.05 6.74 6.55 7.49 6.43 7.00

-----  
File Nax\_23.out

Molecule \_23 C5H5N-Na+

SP Nax\_23 B3LYP/Def2TZVP VAC.



```

1 12
Dipole      8.2869  -0.0002  -0.0012  8.2869
Quadrupole 28.3850  -8.8488 -19.5362 -0.0005 -0.0020 -0.0001

      Atomic coordinates      Mul.      Lowdin      Hirsch.      I-Hirsch      CM5      ESP      NPA      AIM      ACP
7      0.6434  0.0002  0.0003  -0.4657  0.1230  -0.1568  -0.6612  -0.4758  -0.7983  -0.5833  -1.2481  -0.4866
6     -0.0532  -1.1486  0.0001  0.0644  -0.1633  0.0400  0.1905  0.0541  0.4408  0.0339  0.4721  0.0813
6     -1.4374  -1.1951  -0.0000  -0.1149  -0.1079  -0.0111  -0.1444  -0.0620  -0.3630  -0.2230  -0.0016  -0.0544
6     -2.1449  -0.0002  -0.0001  -0.0844  -0.0705  0.0198  0.0132  -0.0340  0.2439  -0.1246  0.0074  -0.0247
6     -0.0534  1.1487  0.0002  0.0643  -0.1633  0.0400  0.1905  0.0541  0.4409  0.0339  0.4723  0.0813
6     -1.4377  1.1950  -0.0001  -0.1149  -0.1079  -0.0111  -0.1444  -0.0620  -0.3630  -0.2230  -0.0015  -0.0544
1      0.5193  -2.0694  0.0001  0.1343  0.1491  0.0572  0.0814  0.1223  0.0146  0.1948  0.0477  0.1036
1     -1.9448  -2.1498  -0.0001  0.1614  0.1607  0.0702  0.1385  0.1268  0.1773  0.2394  0.0855  0.1182
1     -3.2270  -0.0003  -0.0002  0.1649  0.1614  0.0744  0.1345  0.1305  0.0910  0.2365  0.0897  0.1228
1      0.5188  2.0697  0.0003  0.1344  0.1491  0.0572  0.0814  0.1223  0.0146  0.1949  0.0477  0.1036
1     -1.9453  2.1496  -0.0003  0.1614  0.1607  0.0702  0.1385  0.1268  0.1773  0.2394  0.0855  0.1182
11     2.9395  -0.0000  -0.0002  0.8948  0.7090  0.7498  0.9815  0.8968  0.9240  0.9810  0.9429  0.8911

Dipole moment (in D)  8.29 (DEN)      8.72      7.93      7.85      9.31      8.59      8.20      9.23      6.41      8.45

```

-----  
File Nax\_24.out

Molecule \_24 HCN-Na+

SP Nax\_24 B3LYP/Def2TZVP VAC.

1 4

```

Dipole      0.0000  0.0000  3.0827  3.0827
Quadrupole -8.7837  -8.7837  17.5674  0.0000  0.0000  0.0000

      Atomic coordinates      Mul.      Lowdin      Hirsch.      I-Hirsch      CM5      ESP      NPA      AIM      ACP
1      0.0000  0.0000  -2.8604  0.2635  0.1631  0.1709  0.2509  0.2302  0.2514  0.2653  0.2906  0.2317
6      0.0000  0.0000  -1.7882  -0.0625  -0.0020  0.1778  0.2926  0.2455  0.3031  0.2523  1.0596  0.2508
7      0.0000  0.0000  -0.6457  -0.1803  0.1102  -0.1501  -0.5445  -0.4126  -0.5077  -0.5102  -1.3149  -0.3963
11     0.0000  0.0000  1.6463  0.9793  0.7287  0.8014  1.0010  0.9370  0.9532  0.9926  0.9647  0.9138

Dipole moment (in D)  3.08 (DEN)      5.22      3.20      2.93      3.64      3.42      3.06      3.62      1.39      3.12

```

-----

File Nax\_25.out

Molecule \_25 CH3CN-Na+

SP Nax\_25 B3LYP/Def2TZVP VAC.

1 7

Dipole 5.2477 -0.0114 0.0008 5.2477

Quadrupole 25.5256 -12.7628 -12.7628 -0.0120 0.0008 0.0001

|    | Atomic coordinates |         |         | Mul.    | Lowdin  | Hirsch. | I-Hirsch | CM5     | ESP     | NPA     | AIM     | ACP     |
|----|--------------------|---------|---------|---------|---------|---------|----------|---------|---------|---------|---------|---------|
| 6  | -0.9486            | 0.0007  | 0.0000  | -0.0141 | -0.0974 | 0.1673  | 0.5994   | 0.2706  | 0.6100  | 0.4501  | 1.0007  | 0.3165  |
| 6  | -2.3969            | -0.0012 | 0.0001  | -0.2389 | -0.2219 | -0.0170 | -0.4947  | -0.1569 | -0.5013 | -0.7237 | 0.0779  | -0.1859 |
| 1  | -2.7664            | 0.9472  | 0.3922  | 0.1850  | 0.1670  | 0.0897  | 0.2003   | 0.1424  | 0.2107  | 0.2783  | 0.1129  | 0.1433  |
| 1  | -2.7649            | -0.1364 | -1.0178 | 0.1850  | 0.1670  | 0.0896  | 0.2002   | 0.1423  | 0.2102  | 0.2783  | 0.1128  | 0.1432  |
| 1  | -2.7642            | -0.8157 | 0.6257  | 0.1850  | 0.1670  | 0.0896  | 0.2002   | 0.1423  | 0.2103  | 0.2783  | 0.1128  | 0.1432  |
| 7  | 0.1998             | 0.0027  | -0.0002 | -0.2660 | 0.1047  | -0.2024 | -0.7110  | -0.4738 | -0.6974 | -0.5507 | -1.3766 | -0.4657 |
| 11 | 2.4518             | -0.0011 | 0.0001  | 0.9640  | 0.7135  | 0.7833  | 1.0057   | 0.9331  | 0.9576  | 0.9893  | 0.9595  | 0.9053  |

Dipole moment (in D) 5.25 (DEN) 6.54 4.85 4.89 6.15 5.44 5.22 6.31 0.03 5.20

-----  
File Nax\_26.out

Molecule \_26 Na(H2O)+

SP Nax\_26 B3LYP/Def2TZVP VAC.

1 4

Dipole 0.0000 0.0000 2.3704 2.3704

Quadrupole -5.8477 -2.2930 8.1407 0.0000 0.0000 0.0000

|    | Atomic coordinates |         |         | Mul.    | Lowdin  | Hirsch. | I-Hirsch | CM5     | ESP     | NPA     | AIM     | ACP     |
|----|--------------------|---------|---------|---------|---------|---------|----------|---------|---------|---------|---------|---------|
| 11 | 0.0000             | 0.0000  | 1.1099  | 0.9496  | 0.7593  | 0.8208  | 1.0241   | 0.9283  | 0.9921  | 0.9951  | 0.9681  | 0.8963  |
| 8  | 0.0000             | 0.0000  | -1.1036 | -0.7105 | -0.1660 | -0.2345 | -1.0791  | -0.6689 | -1.0163 | -1.0085 | -1.2035 | -0.5150 |
| 1  | 0.0000             | 0.7677  | -1.6902 | 0.3805  | 0.2033  | 0.2069  | 0.5276   | 0.3703  | 0.5121  | 0.5067  | 0.6177  | 0.3094  |
| 1  | 0.0000             | -0.7677 | -1.6902 | 0.3805  | 0.2033  | 0.2069  | 0.5276   | 0.3703  | 0.5121  | 0.5067  | 0.6177  | 0.3094  |

Dipole moment (in D) 2.37 (DEN) 2.65 1.63 2.26 2.61 2.48 2.36 2.42 1.51 2.48

-----  
File Nax\_30.out

Molecule \_30 Na+CH3OH

SP Nax\_30 B3LYP/Def2TZVP VAC.

1 7

Dipole -4.9584 0.1275 0.0004 4.9600

Quadrupole 11.1765 -3.5665 -7.6100 -2.0339 0.0002 -0.0006

|    | Atomic coordinates |         |         | Mul.    | Lowdin  | Hirsch. | I-Hirsch | CM5     | ESP     | NPA     | AIM     | ACP     |
|----|--------------------|---------|---------|---------|---------|---------|----------|---------|---------|---------|---------|---------|
| 8  | 0.3836             | -0.4878 | -0.0000 | -0.5985 | -0.0224 | -0.2088 | -0.8134  | -0.5349 | -0.7842 | -0.8128 | -1.1477 | -0.4258 |
| 6  | 1.5883             | 0.3260  | 0.0000  | -0.1420 | -0.2872 | 0.0298  | -0.0314  | -0.1052 | 0.1196  | -0.2468 | 0.4150  | -0.0946 |
| 1  | 2.1764             | 0.1274  | -0.8948 | 0.1616  | 0.1200  | 0.0612  | 0.1213   | 0.1191  | 0.0738  | 0.1952  | 0.0643  | 0.1158  |
| 1  | 1.2732             | 1.3670  | 0.0002  | 0.1243  | 0.1210  | 0.0596  | 0.1095   | 0.1182  | 0.0802  | 0.1840  | 0.0420  | 0.1064  |
| 1  | 2.1765             | 0.1271  | 0.8947  | 0.1616  | 0.1200  | 0.0612  | 0.1213   | 0.1191  | 0.0738  | 0.1952  | 0.0643  | 0.1158  |
| 1  | 0.6509             | -1.4146 | 0.0002  | 0.3567  | 0.2052  | 0.1935  | 0.4822   | 0.3627  | 0.4768  | 0.4934  | 0.5978  | 0.2937  |
| 11 | -1.7159            | 0.1581  | 0.0000  | 0.9364  | 0.7435  | 0.8034  | 1.0104   | 0.9210  | 0.9600  | 0.9919  | 0.9640  | 0.8887  |

Dipole moment (in D) 4.96 (DEN) 4.68 4.48 4.54 5.36 5.04 4.92 4.82 3.44 4.86

-----  
File Nax\_31.out

Molecule\_31 Na+O(CH3)2

SP Nax\_31 B3LYP/Def2TZVP VAC.

1 10

Dipole -6.0118 -0.0005 -0.0004 6.0118

Quadrupole 12.8904 -4.3900 -8.5004 0.0011 0.0003 0.0000

|    | Atomic coordinates |         |         | Mul.    | Lowdin  | Hirsch. | I-Hirsch | CM5     | ESP     | NPA     | AIM     | ACP     |
|----|--------------------|---------|---------|---------|---------|---------|----------|---------|---------|---------|---------|---------|
| 8  | 0.2272             | -0.0000 | 0.0001  | -0.4817 | 0.1134  | -0.1694 | -0.4805  | -0.3860 | -0.3620 | -0.6136 | -1.1103 | -0.3207 |
| 6  | 1.0335             | 1.1912  | -0.0000 | -0.1473 | -0.2855 | 0.0218  | -0.0852  | -0.1099 | -0.2309 | -0.2563 | 0.4333  | -0.0996 |
| 6  | 1.0341             | -1.1910 | -0.0000 | -0.1473 | -0.2855 | 0.0218  | -0.0852  | -0.1099 | -0.2309 | -0.2563 | 0.4331  | -0.0996 |
| 1  | 1.6607             | 1.2222  | -0.8931 | 0.1531  | 0.1222  | 0.0567  | 0.1152   | 0.1156  | 0.1623  | 0.1915  | 0.0551  | 0.1093  |
| 1  | 1.6611             | 1.2221  | 0.8927  | 0.1531  | 0.1222  | 0.0567  | 0.1152   | 0.1156  | 0.1624  | 0.1915  | 0.0551  | 0.1093  |
| 1  | 0.3637             | 2.0501  | 0.0002  | 0.1173  | 0.1222  | 0.0562  | 0.0965   | 0.1148  | 0.1199  | 0.1852  | 0.0308  | 0.0999  |
| 1  | 1.6613             | -1.2217 | -0.8931 | 0.1531  | 0.1222  | 0.0567  | 0.1152   | 0.1156  | 0.1623  | 0.1915  | 0.0551  | 0.1093  |
| 1  | 1.6617             | -1.2217 | 0.8927  | 0.1531  | 0.1222  | 0.0567  | 0.1152   | 0.1156  | 0.1624  | 0.1915  | 0.0551  | 0.1093  |
| 1  | 0.3646             | -2.0502 | 0.0002  | 0.1174  | 0.1222  | 0.0562  | 0.0965   | 0.1148  | 0.1199  | 0.1852  | 0.0309  | 0.0999  |
| 11 | -1.9632            | -0.0002 | -0.0000 | 0.9293  | 0.7245  | 0.7863  | 0.9972   | 0.9140  | 0.9346  | 0.9899  | 0.9614  | 0.8830  |

Dipole moment (in D) 6.01 (DEN) 5.46 5.22 5.38 6.76 6.04 5.90 5.79 4.11 5.83

-----  
File Nax\_34.out

Molecule \_34 Na+OC(CH3)2

SP Nax\_34 B3LYP/Def2TZVP VAC.

1 11

Dipole -6.5969 0.0003 0.0000 6.5969

Quadrupole 22.8494 -10.4004 -12.4490 0.0001 0.0000 0.1689

|    | Atomic coordinates |         |         | Mul.    | Lowdin  | Hirsch. | I-Hirsch | CM5     | ESP     | NPA     | AIM     | ACP     |
|----|--------------------|---------|---------|---------|---------|---------|----------|---------|---------|---------|---------|---------|
| 8  | -0.4961            | -0.0001 | 0.0000  | -0.5073 | 0.1444  | -0.2586 | -0.7587  | -0.4409 | -0.7886 | -0.7201 | -1.2526 | -0.4335 |
| 6  | 0.7337             | -0.0000 | 0.0000  | 0.3181  | -0.2859 | 0.2172  | 0.8305   | 0.2250  | 0.8588  | 0.6551  | 0.9432  | 0.3753  |
| 6  | 1.5032             | 1.2828  | -0.0047 | -0.3370 | -0.2302 | -0.0673 | -0.5734  | -0.2101 | -0.4793 | -0.7085 | -0.0248 | -0.2440 |
| 6  | 1.5034             | -1.2826 | 0.0047  | -0.3370 | -0.2302 | -0.0673 | -0.5734  | -0.2101 | -0.4792 | -0.7085 | -0.0245 | -0.2440 |
| 1  | 2.3279             | 1.2387  | -0.7184 | 0.1575  | 0.1501  | 0.0672  | 0.1803   | 0.1198  | 0.1489  | 0.2504  | 0.0678  | 0.1200  |
| 1  | 1.9572             | 1.4192  | 0.9824  | 0.1652  | 0.1575  | 0.0713  | 0.1844   | 0.1239  | 0.1588  | 0.2593  | 0.0743  | 0.1224  |
| 1  | 0.8587             | 2.1316  | -0.2198 | 0.1372  | 0.1383  | 0.0567  | 0.1659   | 0.1118  | 0.1525  | 0.2362  | 0.0553  | 0.1015  |
| 1  | 1.9574             | -1.4190 | -0.9825 | 0.1652  | 0.1575  | 0.0713  | 0.1844   | 0.1239  | 0.1588  | 0.2593  | 0.0743  | 0.1224  |
| 1  | 2.3282             | -1.2383 | 0.7183  | 0.1575  | 0.1501  | 0.0672  | 0.1803   | 0.1198  | 0.1489  | 0.2504  | 0.0678  | 0.1200  |
| 1  | 0.8591             | -2.1316 | 0.2199  | 0.1372  | 0.1383  | 0.0567  | 0.1659   | 0.1118  | 0.1525  | 0.2363  | 0.0553  | 0.1015  |
| 11 | -2.6147            | -0.0000 | -0.0000 | 0.9436  | 0.7099  | 0.7855  | 1.0138   | 0.9251  | 0.9678  | 0.9901  | 0.9633  | 0.8583  |

Dipole moment (in D) 6.60 (DEN) 6.63 6.13 6.14 7.41 6.88 6.60 6.22 2.77 6.12

-----  
File Nax\_37.out

Molecule \_37 Na+HCON(CH3)2

SP Nax\_37 B3LYP/Def2TZVP VAC.

1 13

Dipole 7.2957 -0.0458 0.0002 7.2958

Quadrupole 31.4077 -13.2560 -18.1517 1.2703 0.0003 0.0000

|   | Atomic coordinates |         |         | Mul.    | Lowdin  | Hirsch. | I-Hirsch | CM5     | ESP     | NPA     | AIM     | ACP     |
|---|--------------------|---------|---------|---------|---------|---------|----------|---------|---------|---------|---------|---------|
| 7 | -1.1976            | -0.0155 | 0.0000  | -0.0464 | 0.1769  | 0.0046  | -0.0460  | -0.2784 | 0.0971  | -0.3442 | -1.1532 | -0.2652 |
| 6 | -0.0593            | -0.6913 | -0.0000 | 0.2253  | -0.3291 | 0.1644  | 0.5617   | 0.2187  | 0.4229  | 0.5317  | 1.4443  | 0.3227  |
| 6 | -1.2337            | 1.4429  | 0.0000  | -0.2672 | -0.2464 | -0.0136 | -0.2571  | -0.1030 | -0.2246 | -0.4150 | 0.3090  | -0.1126 |
| 6 | -2.4851            | -0.7043 | 0.0000  | -0.2436 | -0.2485 | -0.0090 | -0.2655  | -0.0998 | -0.4912 | -0.3981 | 0.3182  | -0.1059 |

|    |         |         |         |         |        |         |         |         |         |         |         |         |
|----|---------|---------|---------|---------|--------|---------|---------|---------|---------|---------|---------|---------|
| 1  | -1.7603 | 1.7987  | -0.8869 | 0.1536  | 0.1299 | 0.0570  | 0.1324  | 0.1185  | 0.1235  | 0.2157  | 0.0540  | 0.1162  |
| 1  | -0.2203 | 1.8299  | 0.0004  | 0.1405  | 0.1300 | 0.0487  | 0.1314  | 0.1160  | 0.1211  | 0.2257  | 0.0650  | 0.0917  |
| 1  | -1.7610 | 1.7986  | 0.8865  | 0.1536  | 0.1299 | 0.0570  | 0.1324  | 0.1185  | 0.1235  | 0.2157  | 0.0540  | 0.1162  |
| 1  | -3.0567 | -0.4276 | -0.8870 | 0.1538  | 0.1284 | 0.0572  | 0.1330  | 0.1184  | 0.1908  | 0.2134  | 0.0550  | 0.1170  |
| 1  | -2.3304 | -1.7811 | -0.0001 | 0.1346  | 0.1286 | 0.0582  | 0.1262  | 0.1204  | 0.1782  | 0.2166  | 0.0516  | 0.1186  |
| 1  | -3.0566 | -0.4278 | 0.8871  | 0.1538  | 0.1284 | 0.0572  | 0.1330  | 0.1184  | 0.1908  | 0.2134  | 0.0550  | 0.1170  |
| 8  | 1.0807  | -0.1916 | -0.0000 | -0.6042 | 0.0449 | -0.3145 | -0.8447 | -0.5044 | -0.7330 | -0.8050 | -1.2843 | -0.4770 |
| 1  | -0.1894 | -1.7794 | 0.0000  | 0.1184  | 0.1382 | 0.0625  | 0.0499  | 0.1373  | 0.0544  | 0.1404  | 0.0720  | 0.1103  |
| 11 | 3.1619  | 0.0315  | 0.0000  | 0.9276  | 0.6887 | 0.7702  | 1.0132  | 0.9193  | 0.9464  | 0.9899  | 0.9584  | 0.8509  |

Dipole moment (in D) 7.30 (DEN) 6.77 6.58 6.78 8.07 7.61 7.22 7.21 5.64 6.90

-----  
File Nax\_39.out

Molecule \_39 Na+CH2Cl2

SP Nax\_39 B3LYP/Def2TZVP VAC.

1 6

Dipole 0.0000 0.0000 5.5266 5.5266

Quadrupole -8.1754 -8.4213 16.5968 0.0000 0.0000 0.0000

|    | Atomic coordinates |         |         | Mul.    | Lowdin  | Hirsch. | I-Hirsch | CM5     | ESP     | NPA     | AIM     | ACP     |
|----|--------------------|---------|---------|---------|---------|---------|----------|---------|---------|---------|---------|---------|
| 6  | 0.0000             | 0.0000  | -1.3224 | -0.0584 | -0.6336 | 0.0670  | -0.0927  | -0.0357 | -0.8704 | -0.3653 | 0.2167  | 0.0494  |
| 1  | 0.9039             | 0.0000  | -1.9195 | 0.2012  | 0.1322  | 0.0867  | 0.1608   | 0.1428  | 0.4553  | 0.2475  | 0.1516  | 0.1400  |
| 1  | -0.9039            | 0.0000  | -1.9195 | 0.2012  | 0.1322  | 0.0867  | 0.1608   | 0.1428  | 0.4540  | 0.2475  | 0.1516  | 0.1400  |
| 17 | 0.0000             | 1.4838  | -0.3136 | -0.0528 | 0.4812  | 0.0331  | -0.0868  | -0.0142 | 0.0496  | -0.0438 | -0.2329 | -0.0797 |
| 17 | 0.0000             | -1.4838 | -0.3136 | -0.0528 | 0.4812  | 0.0331  | -0.0868  | -0.0142 | 0.0496  | -0.0438 | -0.2329 | -0.0797 |
| 11 | 0.0000             | 0.0000  | 2.0396  | 0.7617  | 0.4069  | 0.6931  | 0.9447   | 0.7785  | 0.8618  | 0.9580  | 0.9458  | 0.8300  |

Dipole moment (in D) 5.53 (DEN) 4.28 4.12 4.67 7.14 5.26 5.44 7.27 5.79 5.48

-----  
File Nax\_40.out

Molecule \_40 Na+S(CH3)2

SP Nax\_40 B3LYP/Def2TZVP VAC.

1 10

Dipole -7.2415 0.0001 1.7762 7.4562

Quadrupole 17.8290 -5.8600 -11.9690 -0.0001 -1.0905 0.0000

|    | Atomic coordinates |         |         | Mul.    | Lowdin  | Hirsch. | I-Hirsch | CM5     | ESP     | NPA     | AIM     | ACP     |
|----|--------------------|---------|---------|---------|---------|---------|----------|---------|---------|---------|---------|---------|
| 16 | 0.2754             | -0.0000 | -0.4753 | -0.0842 | 0.5998  | 0.0211  | -0.0017  | -0.0902 | -0.2168 | 0.0906  | -0.1403 | -0.2069 |
| 6  | 1.1454             | 1.4096  | 0.2771  | -0.3234 | -0.4581 | -0.0601 | -0.4259  | -0.1957 | -0.3479 | -0.7136 | -0.0939 | -0.1898 |
| 6  | 1.1454             | -1.4096 | 0.2771  | -0.3234 | -0.4581 | -0.0601 | -0.4259  | -0.1957 | -0.3478 | -0.7136 | -0.0938 | -0.1898 |
| 1  | 2.1929             | 1.3715  | -0.0163 | 0.1697  | 0.1254  | 0.0641  | 0.1674   | 0.1172  | 0.2168  | 0.2367  | 0.0782  | 0.1247  |
| 1  | 1.0594             | 1.4013  | 1.3619  | 0.1504  | 0.1166  | 0.0530  | 0.1426   | 0.1056  | 0.1330  | 0.2206  | 0.0549  | 0.1100  |
| 1  | 0.7018             | 2.3188  | -0.1250 | 0.1550  | 0.1257  | 0.0611  | 0.1522   | 0.1140  | 0.1679  | 0.2370  | 0.0656  | 0.1194  |
| 1  | 2.1928             | -1.3716 | -0.0164 | 0.1697  | 0.1254  | 0.0641  | 0.1674   | 0.1172  | 0.2168  | 0.2367  | 0.0782  | 0.1247  |
| 1  | 1.0595             | -1.4012 | 1.3619  | 0.1504  | 0.1167  | 0.0530  | 0.1426   | 0.1056  | 0.1330  | 0.2206  | 0.0549  | 0.1100  |
| 1  | 0.7017             | -2.3188 | -0.1249 | 0.1550  | 0.1257  | 0.0611  | 0.1522   | 0.1139  | 0.1679  | 0.2370  | 0.0656  | 0.1194  |
| 11 | -2.3690            | 0.0000  | 0.1671  | 0.7807  | 0.5809  | 0.7427  | 0.9289   | 0.8079  | 0.8770  | 0.9481  | 0.9309  | 0.8786  |

Dipole moment (in D) 7.46 (DEN) 6.63 6.23 6.86 9.34 7.32 7.26 9.77 9.28 8.05

-----  
Keywords:

File mol302.out

Molecule 302 MgClF

SP Mol302 B3LYP/Def2TZVP VAC.

0 3

|            | Atomic coordinates |        |          | Mul.    | Lowdin  | Hirsch. | I-Hirsch | CM5     | ESP     | NPA     | AIM     | ACP     |
|------------|--------------------|--------|----------|---------|---------|---------|----------|---------|---------|---------|---------|---------|
| Dipole     | 0.0000             | 0.0000 | 0.1218   | 0.1218  |         |         |          |         |         |         |         |         |
| Quadrupole | 5.8157             | 5.8157 | -11.6314 | 0.0000  | 0.0000  | 0.0000  |          |         |         |         |         |         |
| 9          | 0.0000             | 0.0000 | -2.2976  | -0.5630 | -0.3604 | -0.4261 | -0.8313  | -0.5458 | -0.6138 | -0.9090 | -0.8828 | -0.4307 |
| 12         | 0.0000             | 0.0000 | -0.5573  | 0.9888  | 0.3604  | 0.7566  | 1.5909   | 0.9551  | 1.1199  | 1.7436  | 1.7240  | 0.7888  |
| 17         | 0.0000             | 0.0000 | 1.6098   | -0.4258 | 0.0001  | -0.3304 | -0.7596  | -0.4093 | -0.5061 | -0.8347 | -0.8413 | -0.3581 |

Dipole moment (in D) 0.12 (DEN) 0.27 3.01 0.12 0.96 0.30 0.14 1.09 1.38 0.13

-----  
File mol303.out

Molecule 303 MgBrF

SP Mol303 B3LYP/Def2TZVP VAC.

0 3

Dipole 0.0000 0.0000 0.2838 0.2838  
 Quadrupole 5.6587 5.6587 -11.3174 0.0000 0.0000 0.0000

|    | Atomic coordinates |        |         | Mul.    | Lowdin  | Hirsch. | I-Hirsch | CM5     | ESP     | NPA     | AIM     | ACP     |
|----|--------------------|--------|---------|---------|---------|---------|----------|---------|---------|---------|---------|---------|
| 9  | 0.0000             | 0.0000 | -2.9085 | -0.5605 | -0.3586 | -0.4261 | -0.8185  | -0.5459 | -0.6190 | -0.9074 | -0.8835 | -0.4290 |
| 12 | 0.0000             | 0.0000 | -1.1685 | 0.9818  | 0.3168  | 0.7202  | 1.5318   | 0.8984  | 1.0968  | 1.7096  | 1.7037  | 0.7548  |
| 35 | 0.0000             | 0.0000 | 1.1485  | -0.4213 | 0.0418  | -0.2940 | -0.7133  | -0.3524 | -0.4777 | -0.8022 | -0.8201 | -0.3258 |

Dipole moment (in D) 0.28 (DEN) 0.00 3.46 0.29 1.10 0.64 0.14 1.34 1.74 0.04

-----  
 File mol304.out

Molecule 304 MgBrCl

SP Mol304 B3LYP/Def2TZVP VAC.

0 3

Dipole 0.0000 0.0000 0.1580 0.1580  
 Quadrupole 5.1768 5.1768 -10.3536 0.0000 0.0000 0.0000

|    | Atomic coordinates |        |         | Mul.    | Lowdin  | Hirsch. | I-Hirsch | CM5     | ESP     | NPA     | AIM     | ACP     |
|----|--------------------|--------|---------|---------|---------|---------|----------|---------|---------|---------|---------|---------|
| 17 | 0.0000             | 0.0000 | -2.8724 | -0.4171 | -0.0001 | -0.3324 | -0.7019  | -0.4095 | -0.4555 | -0.8136 | -0.8403 | -0.3529 |
| 12 | 0.0000             | 0.0000 | -0.6951 | 0.8356  | -0.0377 | 0.6285  | 1.3712   | 0.7624  | 0.8862  | 1.5953  | 1.6586  | 0.6748  |
| 35 | 0.0000             | 0.0000 | 1.6335  | -0.4186 | 0.0378  | -0.2961 | -0.6692  | -0.3529 | -0.4307 | -0.7818 | -0.8183 | -0.3219 |

Dipole moment (in D) 0.16 (DEN) 0.32 0.42 0.16 0.14 0.33 0.05 0.24 0.36 0.09

-----  
 File mol305.out

Molecule 305 Mg=CH2

SP Mol305 B3LYP/Def2TZVP VAC.

0 4

Dipole -0.1078 -3.2510 0.0000 3.2528  
 Quadrupole -1.1668 -0.1575 1.3243 3.0175 0.0000 0.0000

|    | Atomic coordinates |         |         | Mul.    | Lowdin  | Hirsch. | I-Hirsch | CM5     | ESP     | NPA     | AIM     | ACP     |
|----|--------------------|---------|---------|---------|---------|---------|----------|---------|---------|---------|---------|---------|
| 12 | -0.0629            | -0.8430 | 0.0000  | 0.4008  | 0.3658  | 0.3344  | 0.6061   | 0.3917  | 0.4337  | 0.8130  | 0.7950  | 0.3502  |
| 6  | -0.0629            | 1.1957  | 0.0000  | -0.6428 | -0.5988 | -0.3089 | -0.7818  | -0.4592 | -0.5833 | -1.1136 | -0.7674 | -0.4250 |
| 1  | 0.5665             | 1.4710  | 0.8682  | 0.1210  | 0.1165  | -0.0128 | 0.0878   | 0.0337  | 0.0748  | 0.1503  | -0.0139 | 0.0374  |
| 1  | 0.5665             | 1.4710  | -0.8682 | 0.1210  | 0.1165  | -0.0128 | 0.0878   | 0.0337  | 0.0748  | 0.1503  | -0.0139 | 0.0374  |

Dipole moment (in D) 3.25 (DEN) 3.68 3.35 3.31 5.73 3.75 4.07 7.62 7.82 3.34

-----  
File mol307.out

Molecule 307 MgFCH3

SP Mol307 B3LYP/Def2TZVP VAC.

0 6

Dipole 0.0000 0.0000 -2.0256 2.0256

Quadrupole 4.9558 4.9558 -9.9116 0.0000 0.0000 0.0000

|    | Atomic coordinates |         |         | Mul.    | Lowdin  | Hirsch. | I-Hirsch | CM5     | ESP     | NPA     | AIM     | ACP     |
|----|--------------------|---------|---------|---------|---------|---------|----------|---------|---------|---------|---------|---------|
| 9  | 0.0000             | 0.0000  | 1.8868  | -0.5655 | -0.3688 | -0.4415 | -0.8227  | -0.5573 | -0.6677 | -0.9064 | -0.8985 | -0.4402 |
| 12 | 0.0000             | 0.0000  | 0.1331  | 0.9156  | 0.6307  | 0.6950  | 1.5142   | 0.8653  | 1.1695  | 1.6527  | 1.6330  | 0.7350  |
| 6  | 0.0000             | 0.0000  | -1.9232 | -0.7529 | -0.6290 | -0.2850 | -1.1416  | -0.4836 | -1.1820 | -1.3975 | -0.7230 | -0.4964 |
| 1  | -1.0072            | 0.0000  | -2.3463 | 0.1342  | 0.1224  | 0.0105  | 0.1500   | 0.0585  | 0.2254  | 0.2171  | -0.0040 | 0.0672  |
| 1  | 0.5036             | 0.8722  | -2.3463 | 0.1342  | 0.1224  | 0.0105  | 0.1500   | 0.0585  | 0.2274  | 0.2171  | -0.0040 | 0.0672  |
| 1  | 0.5036             | -0.8722 | -2.3463 | 0.1342  | 0.1224  | 0.0105  | 0.1500   | 0.0585  | 0.2274  | 0.2171  | -0.0040 | 0.0672  |

Dipole moment (in D) 2.03 (DEN) 2.12 1.27 1.28 1.01 2.01 2.05 1.59 0.29 1.21

-----  
File mol308.out

Molecule 308 MgClCH3

SP Mol308 B3LYP/Def2TZVP VAC.

0 6

Dipole 0.0000 0.0000 -2.1265 2.1265

Quadrupole 4.0048 4.0048 -8.0096 0.0000 0.0000 0.0000

|    | Atomic coordinates |         |         | Mul.    | Lowdin  | Hirsch. | I-Hirsch | CM5     | ESP     | NPA     | AIM     | ACP     |
|----|--------------------|---------|---------|---------|---------|---------|----------|---------|---------|---------|---------|---------|
| 17 | 0.0000             | 0.0000  | 1.7266  | -0.4414 | -0.0182 | -0.3611 | -0.7242  | -0.4367 | -0.5096 | -0.8246 | -0.8615 | -0.3795 |
| 12 | 0.0000             | 0.0000  | -0.4580 | 0.7739  | 0.2808  | 0.6137  | 1.3870   | 0.7443  | 0.9014  | 1.5462  | 1.5928  | 0.6704  |
| 6  | 0.0000             | 0.0000  | -2.5115 | -0.7392 | -0.6311 | -0.2863 | -1.1095  | -0.4856 | -0.7944 | -1.3749 | -0.7234 | -0.4955 |
| 1  | -1.0088            | 0.0000  | -2.9293 | 0.1356  | 0.1228  | 0.0112  | 0.1489   | 0.0593  | 0.1333  | 0.2178  | -0.0029 | 0.0682  |
| 1  | 0.5044             | 0.8736  | -2.9293 | 0.1356  | 0.1228  | 0.0112  | 0.1489   | 0.0593  | 0.1347  | 0.2178  | -0.0029 | 0.0682  |
| 1  | 0.5044             | -0.8736 | -2.9293 | 0.1356  | 0.1228  | 0.0112  | 0.1489   | 0.0593  | 0.1347  | 0.2178  | -0.0029 | 0.0682  |



Dipole moment (in D) 2.13 (DEN) 2.17 1.66 1.36 1.96 1.91 2.29 2.85 1.80 1.52

-----  
File mol309.out

Molecule 309 MgBrCH3

SP Mol309 B3LYP/Def2TZVP VAC.

0 6

Dipole 0.0000 0.0000 -2.0940 2.0940

Quadrupole 2.9374 2.9374 -5.8748 0.0000 0.0000 0.0000

|    | Atomic coordinates |         |         | Mul.    | Lowdin  | Hirsch. | I-Hirsch | CM5     | ESP     | NPA     | AIM     | ACP     |
|----|--------------------|---------|---------|---------|---------|---------|----------|---------|---------|---------|---------|---------|
| 35 | 0.0000             | 0.0000  | 1.2281  | -0.4494 | 0.0190  | -0.3312 | -0.6847  | -0.3872 | -0.4670 | -0.7944 | -0.8431 | -0.3548 |
| 12 | 0.0000             | 0.0000  | -1.1072 | 0.7725  | 0.2401  | 0.5832  | 1.3364   | 0.6941  | 0.8125  | 1.5115  | 1.5725  | 0.6430  |
| 6  | 0.0000             | 0.0000  | -3.1611 | -0.7315 | -0.6281 | -0.2862 | -1.0969  | -0.4855 | -0.6204 | -1.3705 | -0.7218 | -0.4938 |
| 1  | 0.0000             | 1.0095  | -3.5766 | 0.1361  | 0.1230  | 0.0114  | 0.1484   | 0.0595  | 0.0912  | 0.2178  | -0.0026 | 0.0686  |
| 1  | 0.8743             | -0.5048 | -3.5766 | 0.1361  | 0.1230  | 0.0114  | 0.1484   | 0.0595  | 0.0923  | 0.2178  | -0.0026 | 0.0686  |
| 1  | -0.8743            | -0.5048 | -3.5766 | 0.1361  | 0.1230  | 0.0114  | 0.1484   | 0.0595  | 0.0913  | 0.2178  | -0.0026 | 0.0686  |

Dipole moment (in D) 2.09 (DEN) 2.67 2.03 1.30 2.14 1.67 2.38 3.14 2.25 1.55

-----  
File Mgx\_1.out

Molecule \_1 CH3MgH

SP Mgx\_1 B3LYP/Def2TZVP VAC.

0 6

Dipole 0.0004 -0.4338 0.0000 0.4338

Quadrupole 4.3891 -8.7783 4.3892 0.0015 0.0000 0.0000

|    | Atomic coordinates |         |         | Mul.    | Lowdin  | Hirsch. | I-Hirsch | CM5     | ESP     | NPA     | AIM     | ACP     |
|----|--------------------|---------|---------|---------|---------|---------|----------|---------|---------|---------|---------|---------|
| 12 | 0.0000             | 0.8330  | 0.0000  | 0.4902  | 0.4905  | 0.5420  | 1.3278   | 0.5864  | 0.9497  | 1.4178  | 1.5181  | 0.6085  |
| 6  | 0.0000             | -1.2574 | 0.0000  | -0.7444 | -0.6501 | -0.2980 | -1.0688  | -0.4916 | -0.9033 | -1.3786 | -0.7209 | -0.4961 |
| 1  | 1.0161             | -1.6634 | 0.0000  | 0.1267  | 0.1176  | 0.0036  | 0.1365   | 0.0514  | 0.1476  | 0.2117  | -0.0135 | 0.0598  |
| 1  | -0.5081            | -1.6631 | 0.8800  | 0.1267  | 0.1176  | 0.0036  | 0.1364   | 0.0514  | 0.1494  | 0.2117  | -0.0135 | 0.0598  |
| 1  | -0.5081            | -1.6631 | -0.8800 | 0.1267  | 0.1176  | 0.0036  | 0.1364   | 0.0514  | 0.1494  | 0.2117  | -0.0135 | 0.0598  |
| 1  | -0.0003            | 2.5379  | 0.0000  | -0.1258 | -0.1932 | -0.2548 | -0.6684  | -0.2489 | -0.4927 | -0.6742 | -0.7564 | -0.2919 |

Dipole moment (in D) 0.43 (DEN) 1.89 0.72 0.78 0.35 1.05 0.32 0.71 1.53 0.44

-----  
File Mgx\_2.out

Molecule \_2 MgH(CH=CH2)  
SP Mgx\_2 B3LYP/Def2TZVP VAC.  
0 7

Dipole -0.0887 0.3832 0.0000 0.3933

Quadrupole 3.1084 -5.3674 2.2590 -4.6388 0.0000 0.0000

|    | Atomic coordinates |         |        | Mul.    | Lowdin  | Hirsch. | I-Hirsch | CM5     | ESP     | NPA     | AIM     | ACP     |
|----|--------------------|---------|--------|---------|---------|---------|----------|---------|---------|---------|---------|---------|
| 1  | -1.4338            | -2.6609 | 0.0000 | -0.1212 | -0.1908 | -0.2493 | -0.6620  | -0.2434 | -0.4993 | -0.6697 | -0.7511 | -0.2871 |
| 12 | -0.8019            | -1.0830 | 0.0000 | 0.4156  | 0.5060  | 0.5449  | 1.3280   | 0.5967  | 0.9931  | 1.4355  | 1.5333  | 0.5971  |
| 6  | 0.0000             | 0.8347  | 0.0000 | -0.3151 | -0.4071 | -0.2479 | -0.8705  | -0.3558 | -0.7164 | -0.8675 | -0.6676 | -0.3207 |
| 1  | -0.6276            | 1.7293  | 0.0000 | 0.1053  | 0.1293  | 0.0085  | 0.1342   | 0.0608  | 0.1811  | 0.1763  | -0.0072 | 0.0575  |
| 6  | 1.3149             | 1.0871  | 0.0000 | -0.2768 | -0.2575 | -0.0988 | -0.0910  | -0.2041 | -0.1538 | -0.4073 | -0.1052 | -0.1870 |
| 1  | 2.0672             | 0.3005  | 0.0000 | 0.0934  | 0.1130  | 0.0186  | 0.0690   | 0.0703  | 0.0835  | 0.1621  | -0.0120 | 0.0688  |
| 1  | 1.7279             | 2.0956  | 0.0000 | 0.0987  | 0.1071  | 0.0241  | 0.0922   | 0.0755  | 0.1118  | 0.1706  | 0.0098  | 0.0714  |

Dipole moment (in D) 0.39 (DEN) 1.71 1.07 1.04 0.28 1.36 0.32 1.48 2.12 0.57

-----  
File Mgx\_4.out

Molecule \_4 MgH(CN)  
SP Mgx\_4 B3LYP/Def2TZVP VAC.  
0 4

Dipole 0.0000 0.0000 3.5122 3.5122

Quadrupole 5.8313 5.8313 -11.6626 0.0000 0.0000 0.0000

|    | Atomic coordinates |        |         | Mul.    | Lowdin  | Hirsch. | I-Hirsch | CM5     | ESP     | NPA     | AIM     | ACP     |
|----|--------------------|--------|---------|---------|---------|---------|----------|---------|---------|---------|---------|---------|
| 1  | 0.0000             | 0.0000 | 2.9532  | -0.0891 | -0.1762 | -0.2259 | -0.6476  | -0.2196 | -0.4543 | -0.6383 | -0.7253 | -0.2649 |
| 12 | 0.0000             | 0.0000 | 1.2722  | 0.4888  | 0.5436  | 0.6501  | 1.3970   | 0.7080  | 0.9893  | 1.4573  | 1.5861  | 0.7037  |
| 6  | 0.0000             | 0.0000 | -0.7788 | -0.3443 | -0.3868 | -0.1879 | -0.5682  | -0.1272 | -0.1802 | -0.4364 | 0.3926  | -0.0555 |
| 7  | 0.0000             | 0.0000 | -1.9352 | -0.0555 | 0.0193  | -0.2362 | -0.1811  | -0.3612 | -0.3548 | -0.3826 | -1.2535 | -0.3832 |

Dipole moment (in D) 3.51 (DEN) 3.53 2.09 3.67 3.16 5.04 3.57 5.04 9.59 4.31  
-----

File Mgx\_5.out

Molecule \_5 MgH(NH2)

SP Mgx\_5 B3LYP/Def2TZVP VAC.

0 5

Dipole 0.0000 0.0000 -0.7844 0.7844

Quadrupole 0.7962 5.1120 -5.9081 0.0000 0.0000 0.0000

|    | Atomic coordinates |         |         | Mul.    | Lowdin  | Hirsch. | I-Hirsch | CM5     | ESP     | NPA     | AIM     | ACP     |
|----|--------------------|---------|---------|---------|---------|---------|----------|---------|---------|---------|---------|---------|
| 1  | 0.0000             | 0.0000  | 2.4460  | -0.1176 | -0.1899 | -0.2416 | -0.7063  | -0.2353 | -0.5321 | -0.6771 | -0.7464 | -0.2766 |
| 12 | 0.0000             | 0.0000  | 0.7525  | 0.5468  | 0.4338  | 0.5494  | 1.4792   | 0.7251  | 1.1852  | 1.5386  | 1.5908  | 0.6948  |
| 7  | 0.0000             | 0.0000  | -1.1416 | -0.8598 | -0.5198 | -0.4330 | -1.4277  | -0.9828 | -1.4899 | -1.5756 | -1.5075 | -0.8318 |
| 1  | 0.0000             | 0.8127  | -1.7424 | 0.2153  | 0.1380  | 0.0626  | 0.3275   | 0.2465  | 0.4184  | 0.3570  | 0.3315  | 0.2068  |
| 1  | 0.0000             | -0.8127 | -1.7424 | 0.2153  | 0.1380  | 0.0626  | 0.3275   | 0.2465  | 0.4184  | 0.3570  | 0.3315  | 0.2068  |

Dipole moment (in D) 0.78 (DEN) 1.70 0.12 0.47 0.60 1.12 0.80 0.27 0.30 0.36

-----  
File Mgx\_6.out

Molecule \_6 MgH(OH)

SP Mgx\_6 B3LYP/Def2TZVP VAC.

0 4

Dipole 0.0000 0.0000 -0.6318 0.6318

Quadrupole 2.1298 2.1298 -4.2597 0.0000 0.0000 0.0000

|    | Atomic coordinates |        |         | Mul.    | Lowdin  | Hirsch. | I-Hirsch | CM5     | ESP     | NPA     | AIM     | ACP     |
|----|--------------------|--------|---------|---------|---------|---------|----------|---------|---------|---------|---------|---------|
| 12 | 0.0000             | 0.0000 | 0.6885  | 0.6382  | 0.4624  | 0.5946  | 1.6553   | 0.7465  | 1.1584  | 1.6028  | 1.6266  | 0.6406  |
| 8  | 0.0000             | 0.0000 | -1.0763 | -0.7975 | -0.4242 | -0.4887 | -1.4131  | -0.8191 | -1.1376 | -1.4068 | -1.4761 | -0.6065 |
| 1  | 0.0000             | 0.0000 | 2.3740  | -0.1323 | -0.1872 | -0.2320 | -0.7340  | -0.2255 | -0.4963 | -0.6803 | -0.7366 | -0.2730 |
| 1  | 0.0000             | 0.0000 | -2.0256 | 0.2916  | 0.1490  | 0.1261  | 0.4918   | 0.2981  | 0.4754  | 0.4844  | 0.5861  | 0.2388  |

Dipole moment (in D) 0.63 (DEN) 1.89 0.14 0.62 0.38 1.23 0.57 0.10 1.09 0.18

-----  
File Mgx\_7.out

Molecule \_7 MgCN(OH)

SP Mgx\_7 B3LYP/Def2TZVP VAC.

0 5

```

Dipole      0.0000   0.0000   4.0839   4.0839
Quadrupole  5.1730   5.1730  -10.3460   0.0000   0.0000   0.0000

      Atomic coordinates      Mul.      Lowdin      Hirsch.      I-Hirsch      CM5      ESP      NPA      AIM      ACP
  6      0.0000   0.0000  -1.5103  -0.3435  -0.3644  -0.1780  -0.7028  -0.1192  -0.3126  -0.4632  0.3950  -0.0543
 12      0.0000   0.0000   0.5253   0.8617   0.5775   0.7538   1.7850   0.9844   1.3011   1.7685   1.7294   0.7897
   8      0.0000   0.0000   2.2749  -0.7588  -0.3950  -0.4808  -1.4543  -0.8170  -1.2293  -1.4165  -1.4762  -0.6073
   7      0.0000   0.0000  -2.6664  -0.0636   0.0252  -0.2310  -0.1368  -0.3563  -0.2898  -0.3800  -1.2461  -0.3778
   1      0.0000   0.0000   3.2241   0.3041   0.1568   0.1361   0.5089   0.3082   0.5306   0.4912   0.5979   0.2497

Dipole moment (in D)  4.08 (DEN)      1.90      1.89      3.01      3.35      3.76      4.05      4.82      10.59      4.46

```

-----  
File Mgx\_8.out

```

Molecule_8      MgH(ONO)
SP Mgx_8 B3LYP/Def2TZVP VAC.
   0   5

```

```

Dipole      0.6641  -0.3462   0.0000   0.7489
Quadrupole  -5.6047  -0.8631   6.4678   3.3748   0.0000   0.0000

      Atomic coordinates      Mul.      Lowdin      Hirsch.      I-Hirsch      CM5      ESP      NPA      AIM      ACP
   1      2.5721  -1.3370   0.0000  -0.1168  -0.1808  -0.2370  -0.6869  -0.2303  -0.5243  -0.6653  -0.7374  -0.2797
  12      1.0777  -0.5603   0.0000   0.6019   0.4210   0.5735   1.4550   0.7680   1.1315   1.4757   1.6150   0.6194
   8     -0.9713  -0.6814   0.0000  -0.3805  -0.0750  -0.2168  -0.5886  -0.2518  -0.3494  -0.5776  -0.7141  -0.2267
   7     -1.1049   0.5745   0.0000   0.2758  -0.0903   0.0970   0.4092  -0.0340   0.0937   0.3449   0.5501   0.1138
   8      0.0000   1.1864   0.0000  -0.3804  -0.0750  -0.2168  -0.5887  -0.2519  -0.3515  -0.5777  -0.7141  -0.2267

Dipole moment (in D)  0.75 (DEN)      2.24      0.87      0.61      0.43      2.80      0.58      0.32      0.38      0.23

```

-----  
File Mgx\_9.out

```

Molecule_9      MgH(NO2)
SP Mgx_9 B3LYP/Def2TZVP VAC.
   0   5

```

```

Dipole      0.0000   0.0000   3.7332   3.7332
Quadrupole  6.5025   0.8134  -7.3159   0.0000   0.0000   0.0000

      Atomic coordinates      Mul.      Lowdin      Hirsch.      I-Hirsch      CM5      ESP      NPA      AIM      ACP

```

|    |        |         |         |         |         |         |         |         |         |         |         |         |
|----|--------|---------|---------|---------|---------|---------|---------|---------|---------|---------|---------|---------|
| 1  | 0.0000 | 0.0000  | 3.1886  | -0.0779 | -0.1729 | -0.2128 | -0.6197 | -0.2063 | -0.4064 | -0.6401 | -0.7060 | -0.2518 |
| 12 | 0.0000 | 0.0000  | 1.5127  | 0.5778  | 0.5738  | 0.6766  | 1.3275  | 0.8239  | 0.8875  | 1.4481  | 1.5785  | 0.7492  |
| 7  | 0.0000 | 0.0000  | -0.5159 | 0.1292  | -0.2443 | 0.0500  | 0.1023  | -0.1735 | 0.4063  | 0.0474  | 0.2293  | 0.0167  |
| 8  | 0.0000 | 1.0828  | -1.1081 | -0.3145 | -0.0783 | -0.2569 | -0.4051 | -0.2221 | -0.4437 | -0.4277 | -0.5511 | -0.2570 |
| 8  | 0.0000 | -1.0828 | -1.1081 | -0.3145 | -0.0783 | -0.2569 | -0.4051 | -0.2221 | -0.4437 | -0.4277 | -0.5511 | -0.2570 |

Dipole moment (in D) 3.73 (DEN) 6.03 2.96 4.27 4.21 5.62 3.94 5.15 5.95 4.28

-----  
File Mgx\_10.out

Molecule\_10 MgHF

SP Mgx\_10 B3LYP/Def2TZVP VAC.

0 3

Dipole 0.0000 0.0000 1.5124 1.5124

Quadrupole 4.3426 4.3426 -8.6852 0.0000 0.0000 0.0000

|    | Atomic coordinates |        |         | Mu1.    | Lowdin  | Hirsch. | I-Hirsch | CM5     | ESP     | NPA     | AIM     | ACP     |
|----|--------------------|--------|---------|---------|---------|---------|----------|---------|---------|---------|---------|---------|
| 1  | 0.0000             | 0.0000 | 2.3251  | -0.1303 | -0.1815 | -0.2238 | -0.6835  | -0.2175 | -0.4818 | -0.6737 | -0.7254 | -0.2669 |
| 12 | 0.0000             | 0.0000 | 0.6438  | 0.7108  | 0.5603  | 0.6643  | 1.4912   | 0.7719  | 1.1234  | 1.5798  | 1.6194  | 0.7043  |
| 9  | 0.0000             | 0.0000 | -1.1168 | -0.5805 | -0.3787 | -0.4404 | -0.8076  | -0.5543 | -0.6416 | -0.9061 | -0.8940 | -0.4374 |

Dipole moment (in D) 1.51 (DEN) 3.86 1.74 1.92 1.31 2.93 1.54 2.22 1.70 1.54

-----  
File Mgx\_12.out

Molecule\_12 MgHCl

SP Mgx\_12 B3LYP/Def2TZVP VAC.

0 3

Dipole 0.0000 0.0000 -1.5744 1.5744

Quadrupole 3.5964 3.5964 -7.1928 0.0000 0.0000 0.0000

|    | Atomic coordinates |        |         | Mu1.    | Lowdin  | Hirsch. | I-Hirsch | CM5     | ESP     | NPA     | AIM     | ACP     |
|----|--------------------|--------|---------|---------|---------|---------|----------|---------|---------|---------|---------|---------|
| 1  | 0.0000             | 0.0000 | -2.8698 | -0.1200 | -0.1809 | -0.2244 | -0.6485  | -0.2181 | -0.4340 | -0.6475 | -0.7231 | -0.2635 |
| 12 | 0.0000             | 0.0000 | -1.1879 | 0.5753  | 0.2212  | 0.5818  | 1.3526   | 0.6494  | 0.9429  | 1.4667  | 1.5793  | 0.6364  |
| 17 | 0.0000             | 0.0000 | 1.0073  | -0.4553 | -0.0403 | -0.3575 | -0.7041  | -0.4312 | -0.5089 | -0.8192 | -0.8563 | -0.3729 |

Dipole moment (in D) 1.57 (DEN) 3.83 1.04 1.96 2.19 2.79 1.86 3.41 3.19 1.80

-----  
File Mgx\_14.out

Molecule \_14 Mg(OH)(SH)

SP Mgx\_14 B3LYP/Def2TZVP VAC.

0 5

Dipole 1.4494 0.5774 0.4875 1.6346

Quadrupole -4.5907 4.1798 0.4109 -2.1215 1.6460 0.0073

|    | Atomic coordinates |         |         | Mul.    | Lowdin  | Hirsch. | I-Hirsch | CM5     | ESP     | NPA     | AIM     | ACP     |
|----|--------------------|---------|---------|---------|---------|---------|----------|---------|---------|---------|---------|---------|
| 12 | 0.5868             | -0.0123 | 0.0118  | 0.8568  | 0.2472  | 0.6323  | 1.6617   | 0.8720  | 1.0489  | 1.6969  | 1.6785  | 0.7186  |
| 8  | 2.3483             | 0.0170  | -0.0396 | -0.8013 | -0.4120 | -0.4851 | -1.4229  | -0.8159 | -1.0324 | -1.4073 | -1.4714 | -0.6071 |
| 16 | -1.7049            | -0.0774 | -0.0015 | -0.4914 | -0.0456 | -0.3086 | -0.8695  | -0.4541 | -0.5579 | -0.9197 | -0.7520 | -0.4649 |
| 1  | 3.2687             | -0.0143 | 0.1931  | 0.3005  | 0.1517  | 0.1289  | 0.4944   | 0.3008  | 0.4282  | 0.4854  | 0.5879  | 0.2417  |
| 1  | -1.8177            | 1.2640  | 0.0064  | 0.1354  | 0.0587  | 0.0325  | 0.1364   | 0.0973  | 0.1132  | 0.1448  | -0.0427 | 0.1117  |

Dipole moment (in D) 1.63 (DEN) 1.37 1.75 0.67 2.63 1.16 1.89 3.07 4.01 1.99

-----  
Keywords:

File mol320.out

Molecule 320 AlH=NH

SP Mol310 B3LYP/Def2TZVP VAC.

0 4

Dipole -0.8712 -2.5436 0.0000 2.6887

Quadrupole 0.3470 -0.1162 -0.2308 -0.8458 0.0000 0.0000

|    | Atomic coordinates |         |        | Mul.    | Lowdin  | Hirsch. | I-Hirsch | CM5     | ESP     | NPA     | AIM     | ACP     |
|----|--------------------|---------|--------|---------|---------|---------|----------|---------|---------|---------|---------|---------|
| 13 | 0.0018             | -0.5655 | 0.0000 | 0.3904  | 0.2981  | 0.4910  | 1.5041   | 0.4805  | 0.9719  | 1.4765  | 2.0844  | 0.5222  |
| 1  | 0.5069             | -2.0365 | 0.0000 | -0.0283 | -0.0977 | -0.1007 | -0.4655  | -0.0206 | -0.2222 | -0.3591 | -0.6802 | -0.0462 |
| 7  | 0.0018             | 1.0683  | 0.0000 | -0.5698 | -0.3464 | -0.4693 | -1.4157  | -0.7331 | -1.0667 | -1.4911 | -1.7972 | -0.6972 |
| 1  | -0.5420            | 1.9099  | 0.0000 | 0.2078  | 0.1460  | 0.0789  | 0.3771   | 0.2732  | 0.3170  | 0.3737  | 0.3930  | 0.2213  |

Dipole moment (in D) 2.69 (DEN) 1.90 0.68 2.08 3.95 2.48 3.33 5.07 5.34 2.61

-----  
File mol317.out

Molecule 317 AlH2NH2

SP Mol317 B3LYP/Def2TZVP VAC.

0 6

Dipole 0.0000 0.0000 -1.2858 1.2858

Quadrupole 0.9678 -1.7136 0.7458 0.0000 0.0000 0.0000

|    | Atomic coordinates |         |         | Mul.    | Lowdin  | Hirsch. | I-Hirsch | CM5     | ESP     | NPA     | AIM     | ACP     |
|----|--------------------|---------|---------|---------|---------|---------|----------|---------|---------|---------|---------|---------|
| 13 | 0.0000             | 0.0000  | 0.6486  | 0.4281  | 0.2129  | 0.4563  | 1.6588   | 0.3437  | 1.1906  | 1.4047  | 2.2690  | 0.4066  |
| 7  | 0.0000             | 0.0000  | -1.1136 | -0.6216 | -0.2742 | -0.3306 | -1.3314  | -0.7600 | -1.2510 | -1.3739 | -1.5267 | -0.6668 |
| 1  | 0.0000             | 0.8193  | -1.6978 | 0.2205  | 0.1573  | 0.0989  | 0.3654   | 0.2921  | 0.4051  | 0.3813  | 0.3653  | 0.2391  |
| 1  | 0.0000             | 1.3915  | 1.3796  | -0.1237 | -0.1267 | -0.1617 | -0.5290  | -0.0839 | -0.3749 | -0.3967 | -0.7367 | -0.1090 |
| 1  | 0.0000             | -1.3915 | 1.3796  | -0.1237 | -0.1267 | -0.1617 | -0.5290  | -0.0839 | -0.3749 | -0.3967 | -0.7367 | -0.1090 |
| 1  | 0.0000             | -0.8193 | -1.6978 | 0.2205  | 0.1573  | 0.0989  | 0.3654   | 0.2921  | 0.4051  | 0.3813  | 0.3653  | 0.2391  |

Dipole moment (in D) 1.29 (DEN) 0.58 2.12 0.57 0.68 0.74 1.18 0.25 0.49 0.51

-----  
File mol315.out

Molecule 315 AlH2OH

SP Mol315 B3LYP/Def2TZVP VAC.

0 5

Dipole -1.2915 0.1240 0.0000 1.2974

Quadrupole -1.9911 -0.7792 2.7703 -2.8590 0.0000 0.0000

|    | Atomic coordinates |         |        | Mul.    | Lowdin  | Hirsch. | I-Hirsch | CM5     | ESP     | NPA     | AIM     | ACP     |
|----|--------------------|---------|--------|---------|---------|---------|----------|---------|---------|---------|---------|---------|
| 13 | 0.0305             | -0.5963 | 0.0000 | 0.4847  | 0.2253  | 0.5286  | 1.7429   | 0.3771  | 1.2030  | 1.5178  | 2.2963  | 0.4070  |
| 8  | 0.0305             | 1.0963  | 0.0000 | -0.5440 | -0.1411 | -0.3708 | -1.1651  | -0.5564 | -0.8306 | -1.1760 | -1.4252 | -0.4647 |
| 1  | -0.7572            | 1.6329  | 0.0000 | 0.3048  | 0.1719  | 0.1550  | 0.4765   | 0.3356  | 0.3826  | 0.4850  | 0.5839  | 0.2713  |
| 1  | -1.3289            | -1.3872 | 0.0000 | -0.1275 | -0.1313 | -0.1605 | -0.5394  | -0.0831 | -0.4006 | -0.4187 | -0.7327 | -0.1107 |
| 1  | 1.4460             | -1.2646 | 0.0000 | -0.1179 | -0.1248 | -0.1523 | -0.5147  | -0.0731 | -0.3545 | -0.4082 | -0.7224 | -0.1028 |

Dipole moment (in D) 1.30 (DEN) 1.16 1.72 0.63 1.90 1.28 1.24 2.38 2.35 1.01

-----  
File mol321.out

Molecule 321 AlH=PH

SP Mol310 B3LYP/Def2TZVP VAC.

```

0 4
Dipole      0.0289   2.7916   0.0000   2.7917
Quadrupole  2.8606  -1.1897  -1.6708   0.7650   0.0000   0.0000

      Atomic coordinates      Mul.      Lowdin      Hirsch.      I-Hirsch      CM5      ESP      NPA      AIM      ACP
13      0.0514   1.0598   0.0000   0.2274   0.0345   0.4202   1.1469   0.3296   0.6817   1.0680   1.8357   0.3865
1      -0.1277   2.6220   0.0000  -0.0481  -0.1083  -0.1228  -0.4184  -0.0467  -0.2023  -0.3678  -0.6930  -0.0693
15      0.0514  -1.0563   0.0000  -0.2234  -0.0091  -0.2684  -0.6630  -0.3469  -0.5081  -0.6742  -0.6309  -0.3823
1      -1.3113  -0.5550   0.0000   0.0442   0.0829  -0.0290  -0.0655   0.0641   0.0288  -0.0261  -0.5119   0.0651

Dipole moment (in D)  2.79 (DEN)      1.59      1.44      2.05      4.18      2.71      3.42      4.32      6.51      2.88

```

```

-----
File mol316.out
Molecule 316  ALH2SH
SP Mol316 B3LYP/Def2TZVP VAC.

```

```

0 5
Dipole      -0.7614   0.5439   0.0000   0.9357
Quadrupole  -0.3226  -1.7630   2.0856   1.3402   0.0000   0.0000

      Atomic coordinates      Mul.      Lowdin      Hirsch.      I-Hirsch      CM5      ESP      NPA      AIM      ACP
13      0.0409   1.1127   0.0000   0.3825   0.0080   0.4356   1.3992   0.2561   0.9540   1.1963   2.2000   0.3409
16      0.0409  -1.0633   0.0000  -0.3063   0.1789  -0.1834  -0.5789  -0.2293  -0.4478  -0.6009  -0.7361  -0.2727
1      -1.2953  -1.1434   0.0000   0.1485   0.0646   0.0533   0.1446   0.1244   0.1442   0.1550  -0.0185   0.1334
1      -1.3318   1.8736   0.0000  -0.1104  -0.1261  -0.1532  -0.4855  -0.0762  -0.3418  -0.3759  -0.7238  -0.1011
1      1.4411   1.8179   0.0000  -0.1144  -0.1255  -0.1523  -0.4794  -0.0749  -0.3086  -0.3745  -0.7220  -0.1004

Dipole moment (in D)  0.94 (DEN)      1.28      3.48      0.44      1.44      0.95      1.11      2.22      2.80      1.11

```

```

-----
File mol319.out
Molecule 319  ALH=S
SP Mol319 B3LYP/Def2TZVP VAC.

```

```

0 3
Dipole      0.0000   0.0000  -3.7868   3.7868
Quadrupole  0.1725   0.1725  -0.3450   0.0000   0.0000   0.0000

      Atomic coordinates      Mul.      Lowdin      Hirsch.      I-Hirsch      CM5      ESP      NPA      AIM      ACP

```



|    |        |        |         |         |         |         |         |         |         |         |         |         |
|----|--------|--------|---------|---------|---------|---------|---------|---------|---------|---------|---------|---------|
| 13 | 0.0000 | 0.0000 | -1.0102 | 0.3022  | -0.0238 | 0.4877  | 1.3041  | 0.3768  | 0.7929  | 1.2402  | 2.0196  | 0.4470  |
| 16 | 0.0000 | 0.0000 | 0.9815  | -0.2795 | 0.1241  | -0.3834 | -0.8885 | -0.3508 | -0.6076 | -0.8842 | -1.3427 | -0.3966 |
| 1  | 0.0000 | 0.0000 | -2.5707 | -0.0227 | -0.1003 | -0.1044 | -0.4156 | -0.0260 | -0.1853 | -0.3560 | -0.6768 | -0.0504 |

Dipole moment (in D) 3.79 (DEN) 2.50 1.94 2.88 5.39 3.16 4.42 5.79 7.77 3.42

-----  
File mol311.out

Molecule 311 AlF

SP Mol311 B3LYP/Def2TZVP VAC.

0 2

Dipole 0.0000 0.0000 1.4813 1.4813

Quadrupole 1.6378 1.6378 -3.2756 0.0000 0.0000 0.0000

Atomic coordinates

Mul.

Lowdin

Hirsch.

I-Hirsch

CM5

ESP

NPA

AIM

ACP

|    |        |        |         |         |         |         |         |         |         |         |         |         |
|----|--------|--------|---------|---------|---------|---------|---------|---------|---------|---------|---------|---------|
| 9  | 0.0000 | 0.0000 | -0.9843 | -0.3362 | -0.0759 | -0.3213 | -0.5063 | -0.3063 | -0.3135 | -0.8407 | -0.9165 | -0.2879 |
| 13 | 0.0000 | 0.0000 | 0.6814  | 0.3362  | 0.0759  | 0.3213  | 0.5063  | 0.3064  | 0.3135  | 0.8407  | 0.9165  | 0.2879  |

Dipole moment (in D) 1.48 (DEN) 2.69 0.61 2.57 4.05 2.45 2.51 6.73 7.33 2.30

-----  
File mol313.out

Molecule 313 AlCl

SP Mol313 B3LYP/Def2TZVP VAC.

0 2

Dipole 0.0000 0.0000 -1.5206 1.5206

Quadrupole 1.1124 1.1124 -2.2247 0.0000 0.0000 0.0000

Atomic coordinates

Mul.

Lowdin

Hirsch.

I-Hirsch

CM5

ESP

NPA

AIM

ACP

|    |        |        |         |         |         |         |         |         |         |         |         |         |
|----|--------|--------|---------|---------|---------|---------|---------|---------|---------|---------|---------|---------|
| 17 | 0.0000 | 0.0000 | 0.9256  | -0.2705 | 0.1978  | -0.2502 | -0.3851 | -0.2137 | -0.2677 | -0.6942 | -0.8437 | -0.2272 |
| 13 | 0.0000 | 0.0000 | -1.2104 | 0.2705  | -0.1978 | 0.2502  | 0.3851  | 0.2138  | 0.2677  | 0.6942  | 0.8437  | 0.2272  |

Dipole moment (in D) 1.52 (DEN) 2.77 2.03 2.57 3.95 2.19 2.75 7.12 8.66 2.33

-----  
File mol314.out

Molecule 314 AlBr

SP Mol314 B3LYP/Def2TZVP VAC.

0 2

Dipole 0.0000 0.0000 -1.7016 1.7016

Quadrupole 0.4875 0.4875 -0.9750 0.0000 0.0000 0.0000

|    | Atomic coordinates |        |         | Mul.    | Lowdin  | Hirsch. | I-Hirsch | CM5     | ESP     | NPA     | AIM     | ACP     |
|----|--------------------|--------|---------|---------|---------|---------|----------|---------|---------|---------|---------|---------|
| 35 | 0.0000             | 0.0000 | 0.6243  | -0.2721 | 0.1569  | -0.2317 | -0.3540  | -0.1782 | -0.2645 | -0.6422 | -0.8080 | -0.2067 |
| 13 | 0.0000             | 0.0000 | -1.6809 | 0.2721  | -0.1569 | 0.2317  | 0.3540   | 0.1782  | 0.2645  | 0.6422  | 0.8080  | 0.2067  |

Dipole moment (in D) 1.70 (DEN) 3.01 1.74 2.57 3.92 1.97 2.93 7.11 8.95 2.29

-----  
File Alx\_12.out

Molecule\_12 ALS

SP Alx\_12 B3LYP/Def2TZVP VAC.

0 2

Dipole 0.0000 0.0000 -3.7537 3.7537

Quadrupole -0.9624 -0.9624 1.9248 0.0000 0.0000 0.0000

|    | Atomic coordinates |        |         | Mul.    | Lowdin  | Hirsch. | I-Hirsch | CM5     | ESP     | NPA     | AIM     | ACP     |
|----|--------------------|--------|---------|---------|---------|---------|----------|---------|---------|---------|---------|---------|
| 16 | 0.0000             | 0.0000 | 0.9169  | -0.2956 | 0.1204  | -0.3443 | -0.6363  | -0.3155 | -0.5004 | -0.8920 | -1.1563 | -0.3557 |
| 13 | 0.0000             | 0.0000 | -1.1285 | 0.2956  | -0.1204 | 0.3443  | 0.6363   | 0.3155  | 0.5004  | 0.8920  | 1.1563  | 0.3557  |

Dipole moment (in D) 3.75 (DEN) 2.90 1.18 3.38 6.25 3.10 4.92 8.76 11.36 3.49

-----  
File Alx\_16.out

Molecule\_16 ALF2

SP Alx\_16 B3LYP/Def2TZVP VAC.

0 3

Dipole 0.0000 0.0000 1.8875 1.8875

Quadrupole 3.8148 -4.9871 1.1723 0.0000 0.0000 0.0000

|    | Atomic coordinates |         |         | Mul.    | Lowdin  | Hirsch. | I-Hirsch | CM5     | ESP     | NPA     | AIM     | ACP     |
|----|--------------------|---------|---------|---------|---------|---------|----------|---------|---------|---------|---------|---------|
| 13 | 0.0000             | 0.0000  | 0.4811  | 0.6496  | 0.0679  | 0.5890  | 1.1982   | 0.5582  | 0.7242  | 1.5430  | 1.7642  | 0.5340  |
| 9  | 0.0000             | 1.4305  | -0.3475 | -0.3248 | -0.0339 | -0.2945 | -0.5991  | -0.2791 | -0.3621 | -0.7715 | -0.8825 | -0.2670 |
| 9  | 0.0000             | -1.4305 | -0.3475 | -0.3248 | -0.0339 | -0.2945 | -0.5991  | -0.2791 | -0.3621 | -0.7715 | -0.8825 | -0.2670 |

Dipole moment (in D) 1.89 (DEN) 2.59 0.27 2.34 4.77 2.22 2.88 6.14 7.02 2.13

-----  
File Alx\_19.out

Molecule\_19 ALF20

SP Alx\_19 B3LYP/Def2TZVP VAC.

0 4

Dipole 0.0000 0.0000 -0.1593 0.1593

Quadrupole 5.6875 -2.4086 -3.2789 0.0000 0.0000 0.0000

|    | Atomic coordinates |         |         | Mul.    | Lowdin  | Hirsch. | I-Hirsch | CM5     | ESP     | NPA     | AIM     | ACP     |
|----|--------------------|---------|---------|---------|---------|---------|----------|---------|---------|---------|---------|---------|
| 8  | 0.0000             | 0.0000  | 1.7412  | -0.2746 | 0.0136  | -0.2202 | -0.6756  | -0.2318 | -0.4689 | -0.6596 | -0.8168 | -0.1935 |
| 13 | 0.0000             | 0.0000  | 0.0115  | 0.9180  | -0.0195 | 0.7718  | 2.1107   | 0.7507  | 1.4488  | 2.1338  | 2.5240  | 0.7082  |
| 9  | 0.0000             | 1.4306  | -0.7822 | -0.3217 | 0.0029  | -0.2758 | -0.7176  | -0.2595 | -0.4899 | -0.7371 | -0.8536 | -0.2573 |
| 9  | 0.0000             | -1.4306 | -0.7822 | -0.3217 | 0.0029  | -0.2758 | -0.7176  | -0.2595 | -0.4899 | -0.7371 | -0.8536 | -0.2573 |

Dipole moment (in D) 0.16 (DEN) 0.17 0.09 0.27 0.14 0.05 0.16 0.14 0.28 0.35

-----  
File Alx\_21.out

Molecule\_21 AlCl+

SP Alx\_21 B3LYP/Def2TZVP VAC.

1 2

Dipole 0.0000 0.0000 -5.6238 5.6238

Quadrupole -2.8550 -2.8550 5.7100 0.0000 0.0000 0.0000

|    | Atomic coordinates |        |         | Mul.   | Lowdin | Hirsch. | I-Hirsch | CM5    | ESP     | NPA     | AIM     | ACP    |
|----|--------------------|--------|---------|--------|--------|---------|----------|--------|---------|---------|---------|--------|
| 13 | 0.0000             | 0.0000 | -1.1541 | 0.9195 | 0.4780 | 0.9622  | 1.2450   | 0.9156 | 1.0653  | 1.4548  | 1.6253  | 0.9525 |
| 17 | 0.0000             | 0.0000 | 0.8825  | 0.0805 | 0.5220 | 0.0378  | -0.2450  | 0.0844 | -0.0653 | -0.4548 | -0.6253 | 0.0475 |

Dipole moment (in D) 5.62 (DEN) 4.76 0.44 5.17 7.94 4.72 6.18 9.99 11.66 5.08

-----  
File Alx\_24.out

Molecule\_24 AlCl2

SP Alx\_24 B3LYP/Def2TZVP VAC.

0 3

|                      |                    |         |         |         |         |         |          |         |         |         |         |         |
|----------------------|--------------------|---------|---------|---------|---------|---------|----------|---------|---------|---------|---------|---------|
| Dipole               | 0.0000             | 0.0000  | 1.5279  | 1.5279  |         |         |          |         |         |         |         |         |
| Quadrupole           | 2.7376             | -4.1723 | 1.4347  | 0.0000  | 0.0000  | 0.0000  |          |         |         |         |         |         |
|                      | Atomic coordinates |         |         | Mul.    | Lowdin  | Hirsch. | I-Hirsch | CM5     | ESP     | NPA     | AIM     | ACP     |
| 13                   | 0.0000             | 0.0000  | 0.7692  | 0.4442  | -0.5295 | 0.3986  | 0.8656   | 0.3219  | 0.4980  | 1.1169  | 1.6009  | 0.3559  |
| 17                   | 0.0000             | 1.8291  | -0.2941 | -0.2221 | 0.2648  | -0.1993 | -0.4328  | -0.1609 | -0.2490 | -0.5585 | -0.8006 | -0.1779 |
| 17                   | 0.0000             | -1.8291 | -0.2941 | -0.2221 | 0.2648  | -0.1993 | -0.4328  | -0.1609 | -0.2490 | -0.5585 | -0.8006 | -0.1779 |
| Dipole moment (in D) | 1.53 (DEN)         |         | 2.27    | 2.70    | 2.04    | 4.42    | 1.64     | 2.54    | 5.70    | 8.18    | 1.82    |         |

-----  
File Alx\_25.out

Molecule\_25 AlCl2-

SP Alx\_25 B3LYP/Def2TZVP VAC.

-1 3

|                      |                    |         |         |         |         |         |          |         |         |         |         |         |
|----------------------|--------------------|---------|---------|---------|---------|---------|----------|---------|---------|---------|---------|---------|
| Dipole               | 0.0000             | 0.0000  | -0.8492 | 0.8492  |         |         |          |         |         |         |         |         |
| Quadrupole           | 8.4556             | -7.4572 | -0.9984 | 0.0000  | 0.0000  | 0.0000  |          |         |         |         |         |         |
|                      | Atomic coordinates |         |         | Mul.    | Lowdin  | Hirsch. | I-Hirsch | CM5     | ESP     | NPA     | AIM     | ACP     |
| 13                   | 0.0000             | 0.0000  | 1.0781  | 0.0185  | -0.8263 | -0.1174 | 0.0612   | -0.1645 | -0.1259 | 0.4795  | 0.8193  | -0.1789 |
| 17                   | 0.0000             | 1.7681  | -0.4122 | -0.5093 | -0.0869 | -0.4413 | -0.5306  | -0.4177 | -0.4370 | -0.7397 | -0.9098 | -0.4105 |
| 17                   | 0.0000             | -1.7681 | -0.4122 | -0.5093 | -0.0869 | -0.4413 | -0.5306  | -0.4177 | -0.4370 | -0.7397 | -0.9098 | -0.4105 |
| Dipole moment (in D) | 0.85 (DEN)         |         | 2.11    | 3.93    | 1.14    | 2.42    | 0.80     | 1.08    | 5.41    | 7.85    | 0.70    |         |

-----  
File Alx\_27.out

Molecule\_27 AlClF+

SP Alx\_27 B3LYP/Def2TZVP VAC.

1 3

|            |                    |        |         |         |        |         |          |         |         |         |         |         |
|------------|--------------------|--------|---------|---------|--------|---------|----------|---------|---------|---------|---------|---------|
| Dipole     | 0.0000             | 0.0000 | -0.2439 | 0.2439  |        |         |          |         |         |         |         |         |
| Quadrupole | 0.6224             | 0.6224 | -1.2448 | 0.0000  | 0.0000 | 0.0000  |          |         |         |         |         |         |
|            | Atomic coordinates |        |         | Mul.    | Lowdin | Hirsch. | I-Hirsch | CM5     | ESP     | NPA     | AIM     | ACP     |
| 9          | 0.0000             | 0.0000 | -2.0987 | -0.1412 | 0.0929 | -0.1835 | -0.6153  | -0.1660 | -0.3037 | -0.6937 | -0.8019 | -0.1749 |
| 13         | 0.0000             | 0.0000 | -0.5015 | 0.9879  | 0.3119 | 1.1134  | 2.0217   | 1.0442  | 1.3582  | 2.1006  | 2.4587  | 1.1039  |
| 17         | 0.0000             | 0.0000 | 1.4946  | 0.1533  | 0.5952 | 0.0701  | -0.4064  | 0.1218  | -0.0545 | -0.4069 | -0.6568 | 0.0710  |

Dipole moment (in D) 0.24 (DEN) 0.14 2.59 0.33 1.58 0.03 0.60 0.99 2.55 0.39

-----  
File Alx\_28.out

Molecule\_28 AlClF

SP Alx\_28 B3LYP/Def2TZVP VAC.

0 3

Dipole -1.1330 1.2989 0.0000 1.7236

Quadrupole -3.8657 0.6050 3.2607 -2.4730 0.0000 0.0000

|    | Atomic coordinates |         |        | Mul.    | Lowdin  | Hirsch. | I-Hirsch | CM5     | ESP     | NPA     | AIM     | ACP     |
|----|--------------------|---------|--------|---------|---------|---------|----------|---------|---------|---------|---------|---------|
| 9  | 1.6483             | 0.9486  | 0.0000 | -0.3178 | -0.0375 | -0.2965 | -0.5776  | -0.2814 | -0.3418 | -0.7634 | -0.8847 | -0.2673 |
| 13 | 0.0000             | 0.8064  | 0.0000 | 0.5461  | -0.2312 | 0.4916  | 1.0451   | 0.4377  | 0.6211  | 1.3460  | 1.6828  | 0.4428  |
| 17 | -0.8726            | -1.1188 | 0.0000 | -0.2284 | 0.2687  | -0.1951 | -0.4676  | -0.1562 | -0.2793 | -0.5826 | -0.7977 | -0.1754 |

Dipole moment (in D) 1.72 (DEN) 2.45 2.89 2.21 4.72 2.01 2.81 6.05 7.70 2.00

-----  
File Alx\_29.out

Molecule\_29 AlF2Cl

SP Alx\_29 B3LYP/Def2TZVP VAC.

0 4

Dipole 0.0000 0.0000 0.5061 0.5061

Quadrupole 5.6128 -3.5355 -2.0772 0.0000 0.0000 0.0000

|    | Atomic coordinates |         |         | Mul.    | Lowdin  | Hirsch. | I-Hirsch | CM5     | ESP     | NPA     | AIM     | ACP     |
|----|--------------------|---------|---------|---------|---------|---------|----------|---------|---------|---------|---------|---------|
| 17 | 0.0000             | 0.0000  | 1.6489  | -0.2094 | 0.3434  | -0.1578 | -0.6064  | -0.1142 | -0.3352 | -0.5547 | -0.7863 | -0.1474 |
| 13 | 0.0000             | 0.0000  | -0.4203 | 0.8447  | -0.3403 | 0.7177  | 2.0459   | 0.6426  | 1.2565  | 2.0249  | 2.5018  | 0.6664  |
| 9  | 0.0000             | 1.4082  | -1.2537 | -0.3176 | -0.0016 | -0.2799 | -0.7197  | -0.2642 | -0.4606 | -0.7351 | -0.8576 | -0.2595 |
| 9  | 0.0000             | -1.4082 | -1.2537 | -0.3176 | -0.0016 | -0.2799 | -0.7197  | -0.2642 | -0.4606 | -0.7351 | -0.8576 | -0.2595 |

Dipole moment (in D) 0.51 (DEN) 0.46 3.43 0.67 0.27 0.98 0.36 0.37 0.95 0.61

-----  
File Alx\_30.out

Molecule\_30 AlFC12

SP Alx\_30 B3LYP/Def2TZVP VAC.

|                      |                    |         |         |         |         |         |          |         |         |         |         |         |
|----------------------|--------------------|---------|---------|---------|---------|---------|----------|---------|---------|---------|---------|---------|
| 0                    | 4                  |         |         |         |         |         |          |         |         |         |         |         |
| Dipole               | 0.0000             | 0.0000  | -0.4859 | 0.4859  |         |         |          |         |         |         |         |         |
| Quadrupole           | 4.8745             | -1.3553 | -3.5192 | 0.0000  | 0.0000  | 0.0000  |          |         |         |         |         |         |
|                      | Atomic coordinates |         |         | Mul.    | Lowdin  | Hirsch. | I-Hirsch | CM5     | ESP     | NPA     | AIM     | ACP     |
| 9                    | 0.0000             | 0.0000  | 1.9867  | -0.3119 | -0.0063 | -0.2832 | -0.6880  | -0.2680 | -0.4356 | -0.7252 | -0.8619 | -0.2610 |
| 13                   | 0.0000             | 0.0000  | 0.3479  | 0.7221  | -0.6653 | 0.6133  | 1.8329   | 0.5123  | 1.0736  | 1.7706  | 2.4414  | 0.5657  |
| 17                   | 0.0000             | 1.8133  | -0.6589 | -0.2051 | 0.3358  | -0.1650 | -0.5724  | -0.1221 | -0.3190 | -0.5227 | -0.7896 | -0.1523 |
| 17                   | 0.0000             | -1.8133 | -0.6589 | -0.2051 | 0.3358  | -0.1650 | -0.5724  | -0.1221 | -0.3190 | -0.5227 | -0.7896 | -0.1523 |
| Dipole moment (in D) | 0.49 (DEN)         |         | 0.47    | 3.30    | 0.63    | 0.12    | 0.93     | 0.34    | 0.65    | 0.85    | 0.58    |         |

-----
