# Supplementary material for: A simple model for calculating atomic charges in molecules
Source: Royal Society of Chemistry journal article supplement (doi:10.1039/c8cp03764g), 2018-01-01
Supplement: c8cp03764g3.pdf [file c8cp03764g3.pdf]

## Supporting Information:

### **A simple model for calculating atomic charges in molecules**

*Alexander A. Voityuk\**<sup>1,2</sup> *Anton J. Stasyuk*<sup>2</sup> and *Sergei F. Vyboishchikov\**<sup>2,3</sup>

<sup>1</sup> Institució Catalana de Recerca i Estudis Avançats (ICREA), Passeig de Lluís Companys, 23, 08010

Barcelona, Spain

<sup>2</sup> Institut de Química Computacional i Catàlisi and Departament de Química, Universitat de Girona,

Carrer Maria Aurèlia Capmany, 17003 Girona, Spain.

<sup>3</sup> Peoples' Friendship University of Russia (RUDN University), 6 Miklukho-Maklay Street, 117198

Moscow, Russia

## Dipole moments in D

| Molecule | Exp.                     | Den.  | Mul.  | Low.  | Hir.  | I-H   | CM5   | ESP   | NPA   | AIM   | ACP   |       |
|----------|--------------------------|-------|-------|-------|-------|-------|-------|-------|-------|-------|-------|-------|
| PMol001  | fulvene                  | 0.424 | 0.698 | 1.043 | 0.653 | 0.612 | 0.801 | 0.654 | 0.687 | 0.304 | 0.646 | 0.627 |
| PMol002  | propane                  | 0.084 | 0.090 | 0.062 | 0.206 | 0.030 | 0.139 | 0.010 | 0.055 | 0.046 | 0.092 | 0.060 |
| PMol003  | isobutane                | 0.132 | 0.133 | 0.005 | 0.356 | 0.037 | 0.163 | 0.001 | 0.113 | 0.123 | 0.115 | 0.087 |
| PMol004  | cyclopropene             | 0.454 | 0.481 | 0.658 | 0.193 | 0.525 | 0.730 | 0.443 | 0.466 | 0.659 | 0.180 | 0.574 |
| PMol005  | propene                  | 0.366 | 0.417 | 0.595 | 0.569 | 0.349 | 0.422 | 0.399 | 0.415 | 0.319 | 0.387 | 0.377 |
| PMol006  | propyne                  | 0.784 | 0.825 | 0.215 | 1.121 | 0.813 | 0.825 | 0.909 | 0.813 | 0.464 | 0.836 | 0.836 |
| PMol007  | 1,3-pentadiyne           | 1.207 | 1.344 | 0.291 | 1.666 | 1.353 | 1.285 | 1.450 | 1.327 | 0.987 | 1.443 | 1.367 |
| PMol008  | ammonia                  | 1.472 | 1.740 | 1.231 | 0.734 | 0.516 | 1.796 | 1.544 | 1.797 | 1.944 | 1.898 | 1.295 |
| PMol009  | water                    | 1.855 | 2.076 | 1.771 | 0.863 | 0.864 | 2.493 | 1.812 | 2.133 | 2.564 | 3.166 | 1.458 |
| PMol010  | Z-diimine                | 2.917 | 2.923 | 1.704 | 1.129 | 0.883 | 1.977 | 2.631 | 2.820 | 2.512 | 2.772 | 2.129 |
| PMol011  | hydroxylamine            | 0.590 | 0.591 | 0.883 | 0.234 | 0.521 | 0.739 | 0.641 | 0.592 | 1.176 | 1.729 | 0.434 |
| PMol012  | nitrogen_monoxide        | 0.159 | 0.120 | 0.310 | 0.555 | 0.169 | 0.322 | 0.145 | 0.095 | 1.018 | 2.289 | 0.304 |
| PMol013  | nitrogen_dioxide         | 0.316 | 0.328 | 0.793 | 0.218 | 0.475 | 1.136 | 0.248 | 0.535 | 1.080 | 1.607 | 0.576 |
| PMol014  | nitroxyl                 | 1.620 | 1.675 | 1.581 | 0.600 | 0.891 | 1.388 | 1.574 | 1.613 | 2.036 | 3.116 | 1.433 |
| PMol015  | methylamine              | 1.310 | 1.370 | 0.983 | 0.684 | 0.352 | 1.313 | 1.245 | 1.339 | 1.586 | 1.835 | 1.157 |
| PMol016  | dimethylamine            | 1.010 | 0.960 | 0.649 | 0.458 | 0.217 | 0.789 | 1.023 | 0.939 | 1.286 | 1.697 | 0.958 |
| PMol017  | trimethylamine           | 0.612 | 0.499 | 0.393 | 0.224 | 0.060 | 0.204 | 0.910 | 0.545 | 1.136 | 1.595 | 0.807 |
| PMol018  | ethylamine               | 1.304 | 1.346 | 0.762 | 0.837 | 0.313 | 1.211 | 1.255 | 1.324 | 1.699 | 1.798 | 1.197 |
| PMol019  | propylamine              | 1.170 | 1.412 | 0.760 | 0.609 | 0.347 | 1.268 | 1.274 | 1.390 | 1.701 | 1.869 | 1.244 |
| PMol020  | cyclopropylamine         | 1.190 | 1.296 | 0.823 | 0.945 | 0.467 | 1.411 | 1.212 | 1.255 | 1.400 | 1.717 | 1.109 |
| PMol021  | isopropylamine           | 1.190 | 1.298 | 0.860 | 0.538 | 0.351 | 1.405 | 1.191 | 1.284 | 1.399 | 1.719 | 1.187 |
| PMol022  | aziridine                | 1.890 | 1.717 | 1.414 | 0.790 | 0.662 | 1.688 | 1.829 | 1.708 | 2.230 | 3.210 | 1.881 |
| PMol023  | piperidine_(NH_equatoria | 0.820 | 0.828 | 0.689 | 0.557 | 0.195 | 0.877 | 0.985 | 0.872 | 1.170 | 1.591 | 0.955 |
| PMol024  | piperidine_(NH_axial)    | 1.190 | 1.190 | 0.942 | 0.510 | 0.245 | 0.778 | 1.106 | 1.135 | 1.473 | 1.846 | 1.165 |
| PMol025  | 1,2,3,6-Tetrahydropyridi | 0.990 | 0.982 | 0.814 | 1.034 | 0.350 | 0.969 | 1.093 | 1.012 | 1.271 | 1.631 | 0.961 |
| PMol026  | 1,2,3,6-Tetrahydropyridi | 1.007 | 0.989 | 0.460 | 0.814 | 0.184 | 0.738 | 0.926 | 0.930 | 1.515 | 1.538 | 1.059 |
| PMol027  | aniline                  | 1.530 | 1.669 | 1.753 | 2.259 | 1.360 | 1.482 | 1.650 | 1.746 | 1.519 | 1.450 | 1.125 |
| PMol028  | pyrrole                  | 1.767 | 1.914 | 1.500 | 2.527 | 1.555 | 2.021 | 1.524 | 1.897 | 1.720 | 1.057 | 1.102 |
| PMol029  | pyridine                 | 2.215 | 2.236 | 1.644 | 0.426 | 1.102 | 1.702 | 2.050 | 2.233 | 2.383 | 4.199 | 2.177 |
| PMol030  | 2-methylpyridine         | 1.850 | 1.855 | 1.110 | 0.735 | 0.824 | 1.510 | 1.680 | 1.841 | 1.992 | 3.684 | 1.856 |
| PMol031  | 4-methylpyridine         | 2.700 | 2.749 | 2.253 | 1.397 | 1.617 | 1.970 | 2.648 | 2.735 | 2.841 | 4.794 | 2.661 |
| PMol032  | indole                   | 2.100 | 2.188 | 2.014 | 2.614 | 1.887 | 2.124 | 1.838 | 2.155 | 1.815 | 1.197 | 1.473 |
| PMol033  | quinoline                | 2.290 | 2.066 | 1.289 | 0.482 | 1.015 | 1.668 | 1.921 | 2.059 | 2.231 | 3.868 | 2.051 |
| PMol034  | isoquinoline             | 2.730 | 2.590 | 1.601 | 0.853 | 1.494 | 2.054 | 2.428 | 2.574 | 2.735 | 4.670 | 2.543 |
| PMol035  | imidazole                | 3.800 | 3.764 | 2.627 | 2.525 | 2.356 | 3.335 | 3.315 | 3.760 | 3.732 | 3.519 | 3.037 |
| PMol036  | pyridazine               | 4.220 | 4.210 | 2.719 | 0.746 | 2.067 | 2.841 | 3.803 | 4.083 | 4.176 | 7.267 | 4.006 |
| PMol037  | pyrimidine               | 2.334 | 2.343 | 1.566 | 0.449 | 1.152 | 1.824 | 2.159 | 2.348 | 2.565 | 4.477 | 2.293 |
| PMol038  | 2-methylpyrimidine       | 1.676 | 1.650 | 0.824 | 0.617 | 0.653 | 1.623 | 1.516 | 1.665 | 1.765 | 3.597 | 1.702 |

|         |                          |       |       |       |       |       |       |       |       |       |        |       |
|---------|--------------------------|-------|-------|-------|-------|-------|-------|-------|-------|-------|--------|-------|
| PMol039 | hydrogen_cyanide         | 2.985 | 3.030 | 1.062 | 0.372 | 1.655 | 2.666 | 2.673 | 2.992 | 2.814 | 7.450  | 2.768 |
| PMol040 | acetonitrile             | 3.925 | 4.010 | 2.270 | 1.794 | 2.716 | 3.531 | 3.824 | 4.020 | 3.452 | 8.983  | 3.835 |
| PMol041 | malonic_dinitrile        | 3.730 | 3.834 | 2.212 | 1.341 | 2.458 | 3.389 | 3.649 | 3.860 | 3.275 | 8.937  | 3.693 |
| PMol042 | propionitrile            | 4.050 | 4.113 | 2.382 | 1.896 | 2.848 | 3.628 | 3.962 | 4.087 | 3.529 | 9.200  | 3.943 |
| PMol043 | butanenitrile(anti)      | 3.910 | 4.093 | 2.346 | 1.805 | 2.812 | 3.656 | 3.928 | 4.055 | 3.494 | 9.147  | 3.923 |
| PMol044 | butanenitrile(gauche)    | 3.730 | 4.246 | 2.450 | 2.158 | 3.037 | 3.759 | 4.158 | 4.251 | 3.675 | 9.386  | 4.099 |
| PMol045 | cyclopropane_carbonitril | 4.131 | 4.384 | 2.744 | 2.114 | 3.144 | 3.886 | 4.211 | 4.371 | 3.807 | 9.454  | 4.212 |
| PMol046 | isobutyronitrile         | 4.290 | 4.136 | 2.397 | 2.056 | 2.900 | 3.579 | 4.039 | 4.127 | 3.604 | 9.283  | 3.970 |
| PMol047 | cyclobutane_carbonitrile | 4.040 | 4.356 | 2.865 | 2.129 | 3.157 | 3.879 | 4.236 | 4.320 | 3.719 | 9.652  | 4.215 |
| PMol048 | t-butyl_cyanide          | 3.950 | 4.131 | 2.448 | 2.212 | 2.925 | 3.444 | 4.099 | 4.148 | 3.669 | 9.323  | 3.965 |
| PMol049 | pentanenitrile           | 4.120 | 4.363 | 2.558 | 2.178 | 3.144 | 3.911 | 4.255 | 4.367 | 3.719 | 9.521  | 4.212 |
| PMol050 | benzonitrile             | 4.180 | 4.711 | 2.413 | 2.285 | 3.513 | 4.327 | 4.564 | 4.712 | 4.170 | 9.955  | 4.583 |
| PMol051 | 2-methylaziridine(cis)   | 1.770 | 1.812 | 1.398 | 1.130 | 0.814 | 1.727 | 2.016 | 1.809 | 2.436 | 3.393  | 2.041 |
| PMol052 | 2-methylaziridine(trans) | 1.570 | 1.647 | 1.433 | 0.500 | 0.615 | 1.720 | 1.725 | 1.569 | 2.123 | 3.159  | 1.863 |
| PMol053 | E-ethanimine             | 2.058 | 2.054 | 1.137 | 0.239 | 1.015 | 2.029 | 1.951 | 2.038 | 2.422 | 4.654  | 2.074 |
| PMol054 | Z-ethanimine             | 2.560 | 2.566 | 1.734 | 1.128 | 1.336 | 2.222 | 2.431 | 2.536 | 2.745 | 5.037  | 2.444 |
| PMol055 | Z-N-ethylidene_methanami | 1.498 | 1.464 | 0.414 | 0.350 | 0.687 | 1.224 | 1.567 | 1.470 | 1.826 | 4.025  | 1.586 |
| PMol056 | N-methylformaldimine     | 1.530 | 1.484 | 0.900 | 0.433 | 0.540 | 1.032 | 1.557 | 1.483 | 1.764 | 3.965  | 1.529 |
| PMol057 | diazomethane             | 1.500 | 1.668 | 1.709 | 0.169 | 0.728 | 0.968 | 1.837 | 1.680 | 1.116 | 3.574  | 1.809 |
| PMol058 | methyl_azide             | 2.170 | 2.366 | 2.199 | 0.779 | 1.251 | 1.881 | 2.381 | 2.411 | 2.197 | 3.276  | 2.405 |
| PMol059 | E-2-butenenitrile        | 4.750 | 4.822 | 3.188 | 2.810 | 3.618 | 4.305 | 4.711 | 4.836 | 4.273 | 9.986  | 4.663 |
| PMol060 | Z-2-butenenitrile        | 4.080 | 4.310 | 2.645 | 2.290 | 3.108 | 4.014 | 4.148 | 4.310 | 4.034 | 9.240  | 4.182 |
| PMol061 | cianoacetylene           | 3.732 | 3.880 | 2.787 | 1.387 | 2.603 | 3.512 | 3.597 | 3.890 | 3.682 | 8.537  | 3.683 |
| PMol062 | acrylonitrile            | 3.920 | 4.010 | 2.219 | 1.753 | 2.808 | 3.614 | 3.855 | 4.020 | 3.605 | 9.070  | 3.882 |
| PMol063 | methacrylonitrile        | 3.690 | 4.043 | 2.140 | 1.895 | 2.845 | 3.431 | 3.926 | 4.049 | 3.509 | 9.231  | 3.879 |
| PMol064 | 2-cyanopyridine          | 5.780 | 5.842 | 3.627 | 2.220 | 3.935 | 5.151 | 5.656 | 5.835 | 5.510 | 12.367 | 5.708 |
| PMol065 | 3-cyanopyridine          | 3.660 | 4.012 | 2.211 | 1.965 | 2.988 | 3.640 | 3.877 | 3.994 | 3.574 | 8.517  | 3.906 |
| PMol066 | 4-cyanopyridine          | 1.960 | 2.090 | 0.610 | 1.445 | 2.012 | 2.226 | 2.115 | 2.081 | 1.396 | 5.336  | 2.012 |
| PMol067 | cyanimide                | 4.280 | 4.659 | 2.219 | 2.932 | 3.171 | 4.270 | 4.351 | 4.679 | 3.888 | 6.836  | 3.953 |
| PMol068 | cyanoallene              | 4.280 | 4.463 | 2.787 | 2.311 | 3.303 | 4.049 | 4.325 | 4.501 | 4.087 | 9.535  | 4.362 |
| PMol069 | cyclopentadiene-1-carbon | 4.250 | 4.698 | 2.648 | 2.390 | 3.553 | 4.342 | 4.566 | 4.692 | 4.223 | 9.846  | 4.612 |
| PMol070 | methylaminonitrile       | 2.640 | 2.661 | 1.613 | 1.796 | 2.419 | 2.220 | 2.651 | 2.669 | 1.860 | 7.241  | 2.650 |
| PMol071 | methanol                 | 1.700 | 1.684 | 1.711 | 0.687 | 0.776 | 1.940 | 1.597 | 1.680 | 2.567 | 3.593  | 1.460 |
| PMol072 | ethanol                  | 1.440 | 1.586 | 1.488 | 0.439 | 0.712 | 2.000 | 1.496 | 1.551 | 2.474 | 3.435  | 1.466 |
| PMol073 | ethylene_glycol          | 2.404 | 2.371 | 2.280 | 1.266 | 1.298 | 2.818 | 2.381 | 2.358 | 3.689 | 5.261  | 2.419 |
| PMol074 | propargyl_alcohol        | 1.130 | 1.393 | 1.843 | 0.879 | 0.567 | 1.677 | 1.276 | 1.410 | 2.560 | 3.229  | 1.245 |
| PMol075 | 2-propanol               | 1.580 | 1.639 | 1.496 | 0.957 | 0.815 | 1.723 | 1.637 | 1.649 | 2.815 | 3.579  | 1.467 |
| PMol076 | 1-propanol(trans)        | 1.550 | 1.477 | 1.369 | 0.477 | 0.691 | 1.859 | 1.485 | 1.491 | 2.514 | 3.370  | 1.413 |
| PMol077 | 1-propanol(gauche)       | 1.580 | 1.512 | 1.405 | 0.651 | 0.727 | 1.974 | 1.506 | 1.496 | 2.414 | 3.277  | 1.553 |
| PMol078 | 1,2-propanediol(CH3-gauc | 2.320 | 2.213 | 2.013 | 1.119 | 1.211 | 2.797 | 2.244 | 2.189 | 3.514 | 4.980  | 2.412 |
| PMol079 | 1,2-propanediol(CH3-anti | 2.568 | 2.535 | 2.404 | 1.293 | 1.526 | 2.706 | 2.641 | 2.555 | 4.087 | 5.601  | 2.630 |

|         |                          |       |       |       |       |       |       |       |       |       |        |       |
|---------|--------------------------|-------|-------|-------|-------|-------|-------|-------|-------|-------|--------|-------|
| PMol080 | 1-butanol                | 1.660 | 1.543 | 1.409 | 0.390 | 0.705 | 1.971 | 1.477 | 1.514 | 2.464 | 3.435  | 1.457 |
| PMol081 | cyclopropanol(gauche)    | 1.460 | 1.520 | 1.390 | 0.867 | 0.683 | 1.875 | 1.458 | 1.489 | 2.433 | 3.608  | 1.398 |
| PMol082 | cyclobutanol             | 1.620 | 1.510 | 1.398 | 0.639 | 0.665 | 1.823 | 1.419 | 1.479 | 2.364 | 3.478  | 1.389 |
| PMol083 | phenol                   | 1.224 | 1.319 | 0.972 | 1.541 | 0.625 | 1.531 | 1.304 | 1.309 | 1.954 | 3.640  | 1.122 |
| PMol084 | methyl_propyl_ether      | 1.107 | 1.052 | 1.230 | 0.282 | 0.601 | 1.163 | 1.336 | 1.089 | 2.414 | 3.498  | 1.354 |
| PMol085 | dimethyl_ether           | 1.300 | 1.240 | 1.561 | 0.042 | 0.688 | 1.208 | 1.445 | 1.290 | 2.508 | 3.796  | 1.400 |
| PMol086 | diethylether             | 1.150 | 1.299 | 1.382 | 0.155 | 0.717 | 1.109 | 1.434 | 1.343 | 2.574 | 3.655  | 1.410 |
| PMol087 | vinyl_methyl_ether       | 0.965 | 0.925 | 1.002 | 1.187 | 0.641 | 0.747 | 1.005 | 0.961 | 1.674 | 3.737  | 0.828 |
| PMol088 | tetrahydrofuran          | 1.750 | 1.595 | 1.732 | 0.135 | 0.923 | 1.317 | 1.637 | 1.577 | 2.827 | 4.311  | 1.668 |
| PMol089 | anisole                  | 1.380 | 1.280 | 1.404 | 1.312 | 0.972 | 1.190 | 1.388 | 1.305 | 2.037 | 3.592  | 1.312 |
| PMol090 | tetrahydropyran          | 1.580 | 1.461 | 1.855 | 0.113 | 0.820 | 1.206 | 1.515 | 1.452 | 2.654 | 3.964  | 1.517 |
| PMol091 | 1,3-dioxane              | 2.060 | 2.042 | 2.454 | 0.333 | 1.195 | 2.017 | 2.241 | 2.039 | 3.851 | 5.617  | 2.218 |
| PMol092 | 3,4-dihydro-2,4-pyran    | 1.400 | 1.343 | 1.629 | 1.193 | 0.778 | 0.944 | 1.300 | 1.310 | 1.978 | 4.282  | 1.226 |
| PMol093 | oxetane                  | 1.940 | 1.944 | 1.908 | 0.064 | 1.200 | 1.739 | 1.913 | 1.968 | 3.178 | 4.927  | 1.985 |
| PMol094 | 3-methyleneoxetane       | 1.630 | 1.556 | 1.459 | 0.450 | 0.894 | 1.351 | 1.529 | 1.548 | 3.121 | 4.784  | 1.631 |
| PMol095 | formaldehyde             | 2.332 | 2.308 | 1.793 | 0.137 | 1.474 | 2.366 | 2.160 | 2.309 | 3.298 | 6.510  | 2.349 |
| PMol096 | acetaldehyde             | 2.750 | 2.820 | 2.524 | 0.850 | 1.957 | 2.714 | 2.672 | 2.827 | 3.879 | 6.994  | 2.806 |
| PMol097 | propanal                 | 2.520 | 2.726 | 2.576 | 0.843 | 1.857 | 2.638 | 2.564 | 2.708 | 3.797 | 6.856  | 2.774 |
| PMol098 | butanal                  | 2.720 | 3.020 | 2.641 | 1.032 | 2.183 | 2.909 | 2.899 | 3.030 | 4.004 | 7.281  | 2.989 |
| PMol099 | E-2-butenal              | 3.670 | 4.194 | 3.910 | 2.168 | 3.293 | 4.085 | 3.992 | 4.199 | 5.235 | 8.141  | 4.104 |
| PMol100 | acetone                  | 2.880 | 3.026 | 2.618 | 1.105 | 2.116 | 2.861 | 2.862 | 3.044 | 4.191 | 7.146  | 2.969 |
| PMol101 | 2-butanone               | 2.779 | 2.892 | 2.573 | 0.792 | 1.999 | 2.746 | 2.731 | 2.894 | 4.093 | 6.960  | 2.955 |
| PMol102 | cyclopentanone           | 3.300 | 3.175 | 2.772 | 0.871 | 2.271 | 3.100 | 2.952 | 3.201 | 3.807 | 7.468  | 3.056 |
| PMol103 | acetophenone             | 3.020 | 3.154 | 2.346 | 0.979 | 2.252 | 3.235 | 2.896 | 3.175 | 4.229 | 7.013  | 3.107 |
| PMol104 | cyclobutane-1,2-dione    | 3.831 | 3.969 | 3.749 | 1.003 | 2.794 | 3.291 | 3.768 | 4.029 | 4.856 | 10.133 | 3.949 |
| PMol105 | cyclobutanone            | 2.890 | 3.018 | 2.635 | 0.906 | 2.177 | 2.787 | 2.857 | 3.083 | 3.549 | 7.318  | 2.992 |
| PMol106 | cyclopropanone           | 2.670 | 2.968 | 2.395 | 0.897 | 2.106 | 2.453 | 2.783 | 3.001 | 3.339 | 7.196  | 2.926 |
| PMol107 | cyclopentadienone        | 3.132 | 3.279 | 2.808 | 0.695 | 2.369 | 3.304 | 2.970 | 3.307 | 4.127 | 7.132  | 3.212 |
| PMol108 | 4-cyclopentene-1,3-dione | 1.680 | 1.755 | 0.953 | 0.098 | 1.327 | 2.055 | 1.547 | 1.759 | 2.252 | 3.639  | 1.756 |
| PMol109 | 3-cyclopentenone         | 2.790 | 2.813 | 2.117 | 0.085 | 2.013 | 2.911 | 2.577 | 2.862 | 3.672 | 7.098  | 2.807 |
| PMol110 | cyclohexanone            | 2.870 | 3.334 | 2.856 | 1.096 | 2.399 | 3.339 | 3.125 | 3.346 | 4.232 | 7.558  | 3.217 |
| PMol111 | formic_acid(s-cis)       | 1.425 | 1.530 | 1.085 | 1.695 | 1.353 | 1.310 | 1.387 | 1.525 | 1.618 | 3.515  | 1.466 |
| PMol112 | formic_acid(s-trans)     | 3.787 | 3.958 | 3.102 | 1.612 | 2.469 | 4.404 | 3.753 | 3.928 | 5.102 | 8.407  | 3.586 |
| PMol113 | acetic_acid              | 1.700 | 1.734 | 1.332 | 1.215 | 1.588 | 1.377 | 1.562 | 1.760 | 1.990 | 4.420  | 1.726 |
| PMol114 | glyoxylic_acid(trans)    | 1.860 | 1.953 | 1.436 | 1.987 | 1.253 | 2.511 | 1.975 | 1.967 | 2.500 | 4.141  | 1.853 |
| PMol115 | propionic_acid(cis)      | 1.460 | 1.611 | 1.258 | 0.865 | 1.455 | 1.254 | 1.420 | 1.600 | 1.909 | 4.377  | 1.661 |
| PMol116 | acrylic_acid(s-cis)      | 1.460 | 1.560 | 1.050 | 0.500 | 1.454 | 1.269 | 1.318 | 1.567 | 1.952 | 4.349  | 1.656 |
| PMol117 | acrylic_acid(s-trans)    | 2.020 | 2.172 | 1.682 | 1.639 | 1.940 | 1.964 | 1.881 | 2.215 | 2.552 | 4.825  | 1.938 |
| PMol118 | 2-methoxyethanoic_acid(g | 4.720 | 5.111 | 4.304 | 2.235 | 3.554 | 5.529 | 5.050 | 5.161 | 6.482 | 10.448 | 4.947 |
| PMol119 | acetoacetic_acid         | 2.300 | 2.381 | 2.011 | 1.019 | 1.623 | 2.510 | 2.415 | 2.394 | 3.055 | 5.629  | 2.311 |
| PMol120 | methyl_acetate           | 1.720 | 1.877 | 1.369 | 1.151 | 1.515 | 1.969 | 1.642 | 1.866 | 2.008 | 3.552  | 1.658 |

|         |                           |       |       |       |       |       |       |       |       |       |        |       |
|---------|---------------------------|-------|-------|-------|-------|-------|-------|-------|-------|-------|--------|-------|
| PMol121 | methyl_formate            | 1.770 | 1.903 | 1.664 | 1.573 | 1.509 | 1.960 | 1.668 | 1.914 | 2.015 | 3.106  | 1.581 |
| PMol122 | ethyl_formate(cis)        | 1.810 | 1.963 | 1.745 | 1.771 | 1.545 | 1.980 | 1.728 | 1.928 | 2.123 | 3.063  | 1.605 |
| PMol123 | ethyl_formate(trans)      | 1.980 | 2.168 | 2.065 | 2.011 | 1.768 | 2.004 | 1.953 | 2.195 | 2.343 | 3.509  | 1.700 |
| PMol124 | ethyl_acetate             | 1.780 | 2.038 | 1.705 | 1.571 | 1.670 | 1.966 | 1.833 | 2.067 | 2.258 | 3.795  | 1.692 |
| PMol125 | pentyl_formate            | 1.900 | 2.370 | 2.328 | 2.198 | 1.961 | 2.224 | 2.146 | 2.370 | 2.462 | 3.701  | 1.867 |
| PMol126 | diethyl_carbonate         | 1.100 | 0.495 | 0.247 | 1.189 | 0.781 | 0.562 | 0.299 | 0.530 | 0.503 | 0.846  | 0.270 |
| PMol127 | maleic_anhydride          | 3.940 | 4.209 | 3.245 | 0.278 | 2.955 | 4.182 | 3.926 | 4.210 | 5.714 | 10.878 | 4.251 |
| PMol128 | \beta-propiolactone       | 4.180 | 4.269 | 3.666 | 1.367 | 3.061 | 4.102 | 4.077 | 4.311 | 5.487 | 9.824  | 4.188 |
| PMol129 | \gamma-butyrolactone      | 4.270 | 4.682 | 4.107 | 1.521 | 3.343 | 4.562 | 4.456 | 4.724 | 6.049 | 10.517 | 4.518 |
| PMol130 | 2-methoxyethanol_(gauche) | 2.360 | 1.997 | 1.749 | 0.692 | 0.966 | 2.216 | 2.079 | 2.036 | 3.269 | 4.498  | 1.901 |
| PMol131 | benzyl_alcohol            | 1.710 | 1.760 | 1.598 | 1.359 | 1.033 | 2.022 | 1.839 | 1.736 | 2.475 | 3.167  | 1.792 |
| PMol132 | diketene                  | 3.530 | 3.567 | 3.229 | 0.438 | 2.473 | 3.221 | 3.415 | 3.599 | 5.058 | 10.352 | 3.649 |
| PMol133 | 3-oxetanone               | 0.887 | 1.011 | 0.475 | 0.729 | 0.880 | 0.865 | 0.875 | 1.059 | 0.288 | 2.279  | 0.951 |
| PMol134 | 2-furanone                | 4.905 | 5.044 | 4.376 | 1.941 | 3.718 | 5.135 | 4.742 | 5.064 | 6.678 | 10.776 | 4.952 |
| PMol135 | ketene                    | 1.422 | 1.480 | 0.916 | 0.574 | 0.914 | 1.133 | 1.514 | 1.520 | 2.127 | 8.631  | 1.752 |
| PMol136 | methylketene              | 1.790 | 1.879 | 1.445 | 0.438 | 1.234 | 1.628 | 1.868 | 1.867 | 2.385 | 8.972  | 2.073 |
| PMol137 | formamide                 | 3.965 | 3.959 | 3.264 | 2.415 | 2.890 | 3.739 | 3.596 | 3.930 | 4.738 | 6.733  | 3.409 |
| PMol138 | acetamide                 | 3.902 | 3.885 | 2.966 | 2.138 | 2.827 | 3.626 | 3.546 | 3.894 | 4.685 | 6.951  | 3.387 |
| PMol139 | N-methylformamide         | 4.260 | 4.187 | 4.048 | 2.335 | 3.219 | 4.165 | 3.924 | 4.189 | 5.214 | 7.969  | 4.105 |
| PMol140 | N,N-dimethylformamide     | 4.085 | 4.004 | 3.882 | 2.410 | 3.077 | 3.932 | 3.825 | 4.005 | 5.064 | 7.299  | 3.921 |
| PMol141 | E-N-methylacetamide       | 4.171 | 4.095 | 3.894 | 2.187 | 3.132 | 4.208 | 3.854 | 4.168 | 5.270 | 8.083  | 4.037 |
| PMol142 | Z-N-methylacetamide       | 3.887 | 3.886 | 2.884 | 2.075 | 2.795 | 3.798 | 3.513 | 3.844 | 4.701 | 6.357  | 3.310 |
| PMol143 | N,N-dimethylacetamide     | 3.898 | 3.837 | 3.592 | 2.198 | 2.902 | 3.927 | 3.674 | 3.866 | 5.032 | 7.286  | 3.768 |
| PMol144 | benzamide                 | 3.642 | 3.642 | 2.551 | 1.787 | 2.657 | 3.668 | 3.352 | 3.657 | 4.550 | 6.798  | 3.346 |
| PMol145 | phenylurea                | 3.857 | 3.923 | 2.676 | 2.805 | 2.997 | 3.771 | 3.851 | 3.925 | 4.584 | 5.344  | 3.473 |
| PMol146 | nitromethane              | 3.460 | 3.572 | 3.786 | 1.725 | 2.581 | 3.251 | 3.452 | 3.571 | 4.449 | 6.266  | 3.421 |
| PMol147 | nitroethane               | 3.230 | 3.724 | 3.933 | 1.868 | 2.642 | 3.400 | 3.530 | 3.741 | 4.642 | 6.495  | 3.450 |
| PMol148 | 1-nitropropane            | 3.660 | 3.851 | 4.081 | 2.115 | 2.818 | 3.589 | 3.719 | 3.895 | 4.770 | 6.697  | 3.590 |
| PMol149 | 2-nitropropane            | 3.730 | 3.824 | 3.775 | 2.109 | 2.723 | 3.433 | 3.630 | 3.859 | 4.865 | 6.607  | 3.529 |
| PMol150 | nitrobenzene              | 4.220 | 4.636 | 4.709 | 2.618 | 3.512 | 4.601 | 4.274 | 4.678 | 5.750 | 8.008  | 4.340 |
| PMol151 | methyl_nitrate            | 3.100 | 3.008 | 3.265 | 1.198 | 1.980 | 2.800 | 2.795 | 3.071 | 3.807 | 5.284  | 2.618 |
| PMol152 | acetyl_cyanide            | 3.450 | 3.524 | 2.700 | 1.483 | 2.485 | 2.850 | 3.442 | 3.530 | 3.902 | 8.555  | 3.349 |
| PMol153 | dimethylnitrosamine       | 4.010 | 4.220 | 4.646 | 2.325 | 3.037 | 3.547 | 4.002 | 4.146 | 5.081 | 6.494  | 3.992 |
| PMol154 | formaldoxime              | 0.303 | 0.246 | 0.529 | 0.947 | 0.223 | 0.940 | 0.242 | 0.236 | 1.006 | 3.118  | 0.525 |
| PMol155 | fulminic_acid             | 3.099 | 3.148 | 2.829 | 0.696 | 2.336 | 3.099 | 3.090 | 3.165 | 4.287 | 9.271  | 3.444 |
| PMol156 | 1,4-dihydrooxazole        | 1.770 | 1.760 | 1.482 | 1.318 | 0.862 | 1.484 | 1.719 | 1.806 | 1.709 | 1.428  | 1.605 |
| PMol157 | oxazole                   | 1.503 | 1.554 | 0.876 | 1.415 | 0.810 | 1.473 | 1.488 | 1.579 | 1.438 | 1.983  | 1.472 |
| PMol158 | isoxazole                 | 2.950 | 3.003 | 2.216 | 1.306 | 1.395 | 1.887 | 2.816 | 2.907 | 3.424 | 8.310  | 3.015 |
| PMol159 | morpholine                | 1.550 | 1.554 | 1.384 | 0.662 | 0.880 | 1.186 | 1.447 | 1.559 | 2.098 | 2.758  | 1.020 |
| PMol160 | uracil                    | 4.440 | 4.455 | 3.946 | 2.161 | 3.468 | 4.660 | 4.048 | 4.488 | 5.636 | 9.196  | 4.443 |
| PMol205 | difluoroborane            | 0.971 | 0.873 | 1.326 | 2.048 | 0.663 | 1.045 | 0.947 | 0.909 | 2.175 | 1.895  | 1.215 |

|         |                             |       |       |       |       |       |       |       |       |       |       |       |
|---------|-----------------------------|-------|-------|-------|-------|-------|-------|-------|-------|-------|-------|-------|
| PMol206 | chloroborane                | 0.750 | 0.499 | 1.040 | 4.668 | 0.194 | 0.318 | 0.170 | 0.580 | 0.749 | 2.414 | 0.754 |
| PMol207 | hydroxyborane               | 1.506 | 1.612 | 1.391 | 2.883 | 0.866 | 1.869 | 1.529 | 1.575 | 2.132 | 2.540 | 1.352 |
| PMol208 | difluorohydroxyborane       | 1.860 | 1.998 | 2.280 | 1.245 | 1.269 | 2.164 | 2.004 | 1.951 | 2.568 | 3.026 | 1.783 |
| PMol209 | dihydroxyborane             | 1.470 | 1.571 | 1.448 | 2.781 | 0.766 | 1.906 | 1.483 | 1.525 | 2.252 | 2.646 | 1.418 |
| PMol210 | dihydroxyfluoroborane       | 1.818 | 1.401 | 0.533 | 0.296 | 0.261 | 2.535 | 1.292 | 1.322 | 2.047 | 2.893 | 1.279 |
| PMol211 | boranamine                  | 1.844 | 1.973 | 1.669 | 3.313 | 1.402 | 1.435 | 1.810 | 1.928 | 1.016 | 0.921 | 0.324 |
| PMol212 | difluoroboranamine          | 2.595 | 2.698 | 3.050 | 1.647 | 1.971 | 2.146 | 2.712 | 2.713 | 3.201 | 2.864 | 1.557 |
| PMol213 | difluoro(methyl)borane      | 1.668 | 1.664 | 2.378 | 0.191 | 1.157 | 1.086 | 1.844 | 1.698 | 2.311 | 1.239 | 1.621 |
| PMol214 | ethynyl difluoroborane      | 1.876 | 1.954 | 2.426 | 0.140 | 1.354 | 1.949 | 1.873 | 1.990 | 2.631 | 0.882 | 2.155 |
| PMol215 | difluoro(vinyl)borane       | 1.740 | 2.044 | 2.378 | 0.697 | 1.496 | 1.789 | 2.127 | 2.100 | 2.670 | 1.288 | 2.223 |
| PMol216 | difluoro(ethyl)borane       | 1.690 | 1.666 | 2.329 | 0.172 | 1.123 | 1.175 | 1.854 | 1.709 | 2.204 | 1.259 | 1.778 |
| PMol217 | diaminoborane               | 1.250 | 1.360 | 0.690 | 2.705 | 0.858 | 0.812 | 1.190 | 1.397 | 0.500 | 0.590 | 0.047 |
| PMol218 | BH3B <sub>1</sub> CO_adduct | 1.698 | 1.313 | 2.095 | 4.002 | 1.424 | 1.619 | 1.165 | 1.311 | 0.486 | 5.672 | 0.078 |
| PMol219 | BH3 <sub>1</sub> NH3_adduct | 5.216 | 5.408 | 4.718 | 6.071 | 4.678 | 5.250 | 5.192 | 5.360 | 5.397 | 5.691 | 4.510 |
| PMol220 | BF3 <sub>1</sub> NH3_adduct | 5.903 | 6.009 | 5.823 | 5.445 | 5.239 | 5.531 | 6.128 | 6.029 | 7.158 | 7.048 | 5.445 |
| PMol221 | hydrogen_fluoride           | 1.826 | 1.921 | 1.762 | 0.794 | 0.974 | 2.290 | 1.278 | 1.945 | 2.405 | 3.125 | 1.369 |
| PMol222 | fluorocyclohexane(axial)    | 1.810 | 1.784 | 2.069 | 0.600 | 1.257 | 1.544 | 1.763 | 1.783 | 3.344 | 4.426 | 1.870 |
| PMol223 | fluorocyclohexane(equato)   | 2.110 | 2.134 | 2.365 | 0.686 | 1.563 | 1.988 | 2.061 | 2.160 | 3.594 | 4.961 | 2.119 |
| PMol224 | 1,2-difluoroethane(gauch)   | 2.670 | 2.675 | 3.185 | 0.131 | 1.837 | 2.643 | 2.584 | 2.686 | 4.855 | 6.879 | 2.781 |
| PMol225 | 1-fluoropropane(gauche)     | 1.900 | 1.834 | 2.145 | 0.443 | 1.270 | 1.685 | 1.755 | 1.816 | 3.236 | 4.511 | 1.883 |
| PMol226 | 1-fluoropropane(trans)      | 2.050 | 1.933 | 2.200 | 0.572 | 1.417 | 1.689 | 1.915 | 1.964 | 3.397 | 4.696 | 1.958 |
| PMol227 | fluoromethane               | 1.858 | 1.811 | 2.265 | 0.150 | 1.220 | 1.707 | 1.696 | 1.809 | 3.125 | 4.494 | 1.801 |
| PMol228 | 1,1-difluoroethane          | 2.270 | 2.226 | 2.516 | 0.681 | 1.531 | 1.883 | 2.123 | 2.245 | 3.711 | 5.846 | 2.168 |
| PMol229 | fluoroethane                | 1.937 | 1.900 | 2.242 | 0.514 | 1.327 | 1.710 | 1.815 | 1.897 | 3.314 | 4.607 | 1.894 |
| PMol230 | 2-fluoropropane             | 1.958 | 1.930 | 2.204 | 0.729 | 1.353 | 1.645 | 1.858 | 1.955 | 3.464 | 4.639 | 1.909 |
| PMol231 | difluoromethane             | 1.978 | 1.881 | 2.177 | 0.341 | 1.257 | 1.944 | 1.801 | 1.926 | 3.243 | 5.305 | 1.957 |
| PMol232 | trifluoromethane            | 1.651 | 1.580 | 1.578 | 0.650 | 1.050 | 1.815 | 1.534 | 1.643 | 2.668 | 4.896 | 1.705 |
| PMol233 | 1,1,1-trifluoroethane       | 2.347 | 2.318 | 2.357 | 0.501 | 1.602 | 1.603 | 2.209 | 2.353 | 3.613 | 6.283 | 2.112 |
| PMol234 | pentafluoroethane           | 1.540 | 1.517 | 1.599 | 0.543 | 0.996 | 1.589 | 1.494 | 1.530 | 2.724 | 4.843 | 1.633 |
| PMol235 | 1,1,1,2,2,3,3-heptafluor    | 1.620 | 1.476 | 1.535 | 0.460 | 0.978 | 1.581 | 1.470 | 1.498 | 2.490 | 4.688 | 1.579 |
| PMol236 | 2-fluoro-2-methylpropane    | 1.960 | 1.936 | 2.175 | 0.743 | 1.348 | 1.545 | 1.869 | 1.972 | 3.603 | 4.640 | 1.890 |
| PMol237 | 1,2-difluoroethene          | 2.420 | 2.279 | 3.051 | 0.807 | 1.577 | 2.348 | 2.353 | 2.224 | 4.757 | 7.790 | 2.639 |
| PMol238 | 3-fluoropropene(eclipsed)   | 1.765 | 1.724 | 2.082 | 0.074 | 1.179 | 1.721 | 1.659 | 1.714 | 3.194 | 4.328 | 1.879 |
| PMol239 | 3-fluoropropene(gauche)     | 1.939 | 1.860 | 2.116 | 0.358 | 1.351 | 1.733 | 1.816 | 1.915 | 3.386 | 4.624 | 1.898 |
| PMol240 | 1,1-difluoro-1-propene      | 0.889 | 1.606 | 1.992 | 0.530 | 1.040 | 1.106 | 1.629 | 1.623 | 2.739 | 6.858 | 1.585 |
| PMol241 | fluoroethene                | 1.468 | 1.357 | 1.761 | 0.343 | 0.921 | 1.241 | 1.380 | 1.330 | 2.757 | 4.870 | 1.499 |
| PMol242 | 2-fluoropropene             | 1.610 | 1.575 | 1.869 | 0.792 | 1.129 | 1.245 | 1.592 | 1.588 | 2.936 | 4.972 | 1.630 |
| PMol243 | cis-1-fluoro-1-propene      | 1.460 | 1.413 | 1.877 | 0.832 | 0.979 | 1.312 | 1.435 | 1.351 | 2.851 | 4.799 | 1.595 |
| PMol244 | 1,1-difluoroethene          | 1.389 | 1.190 | 1.498 | 0.699 | 0.730 | 0.580 | 1.267 | 1.221 | 2.393 | 6.493 | 1.306 |
| PMol245 | 1,1-difluoroallene          | 2.070 | 1.941 | 2.343 | 0.012 | 1.459 | 1.768 | 1.986 | 1.978 | 3.139 | 6.929 | 2.089 |
| PMol246 | trifluoroethene             | 1.320 | 1.242 | 1.623 | 0.806 | 0.834 | 1.173 | 1.296 | 1.221 | 2.592 | 5.198 | 1.446 |

|         |                          |       |       |       |       |       |       |       |       |       |        |       |
|---------|--------------------------|-------|-------|-------|-------|-------|-------|-------|-------|-------|--------|-------|
| PMol247 | 3,3,3-trifluoropropene   | 2.450 | 2.431 | 2.181 | 0.618 | 1.730 | 2.094 | 2.280 | 2.486 | 3.834 | 6.522  | 2.221 |
| PMol248 | fluoroallene             | 1.970 | 1.746 | 2.304 | 0.491 | 1.303 | 1.640 | 1.757 | 1.801 | 3.118 | 5.167  | 1.847 |
| PMol249 | fluorobenzene            | 1.600 | 1.480 | 1.781 | 0.156 | 1.055 | 1.444 | 1.532 | 1.523 | 2.945 | 5.229  | 1.637 |
| PMol250 | (trifluoromethyl)benzene | 2.860 | 2.850 | 2.395 | 0.702 | 2.100 | 2.707 | 2.666 | 2.905 | 4.206 | 7.157  | 2.602 |
| PMol251 | ortho-fluorotoluene      | 1.370 | 1.198 | 1.387 | 1.035 | 0.811 | 1.121 | 1.249 | 1.234 | 2.705 | 4.837  | 1.405 |
| PMol252 | meta-fluorotoluene       | 1.860 | 1.715 | 2.092 | 0.849 | 1.311 | 1.529 | 1.823 | 1.759 | 3.139 | 5.455  | 1.852 |
| PMol253 | para-fluorotoluene       | 2.000 | 1.880 | 2.431 | 0.698 | 1.451 | 1.600 | 2.005 | 1.917 | 3.300 | 5.654  | 2.001 |
| PMol254 | 1,3-difluorobenzene      | 1.510 | 1.461 | 1.745 | 0.218 | 1.028 | 1.444 | 1.508 | 1.500 | 2.941 | 5.260  | 1.621 |
| PMol255 | 1,2,3,4-tetrafluorobenze | 2.420 | 2.348 | 2.582 | 0.738 | 1.625 | 1.860 | 2.474 | 2.360 | 4.876 | 9.228  | 2.686 |
| PMol256 | 1,2-difluorobenzene      | 2.460 | 2.452 | 2.870 | 0.469 | 1.735 | 2.165 | 2.570 | 2.498 | 4.980 | 9.125  | 2.762 |
| PMol257 | fluoroacetylene          | 0.721 | 0.542 | 1.239 | 1.353 | 0.300 | 0.248 | 0.743 | 0.578 | 1.740 | 7.228  | 0.894 |
| PMol258 | acetyl_fluoride          | 2.960 | 2.990 | 2.609 | 1.002 | 2.157 | 2.686 | 2.824 | 3.004 | 3.875 | 7.405  | 2.847 |
| PMol259 | 3,3,3-trifluoropropyne   | 2.317 | 2.370 | 3.367 | 0.200 | 1.701 | 2.353 | 2.179 | 2.411 | 3.809 | 5.996  | 2.331 |
| PMol260 | tetrafluoropropyne       | 1.710 | 1.968 | 2.350 | 1.778 | 1.579 | 1.945 | 1.612 | 1.996 | 2.176 | 1.113  | 1.573 |
| PMol261 | carbonyl_fluoride        | 0.950 | 1.095 | 0.109 | 0.756 | 0.756 | 1.388 | 0.861 | 1.064 | 0.764 | 1.773  | 0.971 |
| PMol262 | bis(trifluoromethyl)ethe | 0.540 | 0.039 | 0.184 | 0.256 | 0.143 | 0.444 | 0.063 | 0.037 | 0.188 | 0.358  | 0.155 |
| PMol263 | cyanic_fluoride          | 2.120 | 2.321 | 0.157 | 1.862 | 1.321 | 2.253 | 1.871 | 2.311 | 0.918 | 2.084  | 1.761 |
| PMol264 | trifluoroacetonitrile    | 1.262 | 1.348 | 0.235 | 0.956 | 0.758 | 0.742 | 1.294 | 1.289 | 0.177 | 2.470  | 1.201 |
| PMol265 | 1-fluoro-4-nitrobenzene  | 2.870 | 3.302 | 3.108 | 2.981 | 2.608 | 3.300 | 2.897 | 3.295 | 2.945 | 2.875  | 2.840 |
| PMol322 | SiH                      | 0.119 | 0.086 | 0.350 | 0.633 | 0.893 | 1.917 | 0.359 | 0.917 | 2.546 | 5.190  | 0.381 |
| PMol323 | SiS                      | 1.730 | 1.769 | 2.153 | 1.129 | 2.061 | 3.686 | 1.675 | 2.903 | 6.087 | 10.908 | 1.888 |
| PMol324 | silyl_radical            | 0.051 | 0.093 | 0.200 | 0.347 | 0.478 | 1.451 | 0.061 | 0.745 | 1.210 | 4.418  | 0.070 |
| PMol325 | silylmethyl_radical      | 0.618 | 0.677 | 0.163 | 0.101 | 0.306 | 0.173 | 0.417 | 0.658 | 0.566 | 1.078  | 0.604 |
| PMol326 | methylsilane             | 0.735 | 0.801 | 0.421 | 0.143 | 0.316 | 0.027 | 0.506 | 0.768 | 0.634 | 0.853  | 0.642 |
| PMol327 | dimethylsilane           | 0.713 | 0.772 | 0.356 | 0.284 | 0.250 | 0.062 | 0.484 | 0.766 | 0.785 | 1.170  | 0.609 |
| PMol328 | ethylsilane              | 0.810 | 0.870 | 0.457 | 0.091 | 0.355 | 0.262 | 0.574 | 0.837 | 0.722 | 0.904  | 0.708 |
| PMol329 | trimethylsilane          | 0.525 | 0.560 | 0.216 | 0.360 | 0.137 | 0.120 | 0.353 | 0.591 | 0.714 | 1.151  | 0.433 |
| PMol330 | vinylsilane              | 0.657 | 0.729 | 0.142 | 0.344 | 0.298 | 0.433 | 0.439 | 0.695 | 0.743 | 1.176  | 0.630 |
| PMol331 | phenylsilane             | 0.845 | 0.959 | 0.237 | 0.466 | 0.477 | 0.866 | 0.618 | 0.908 | 0.758 | 0.999  | 0.852 |
| PMol332 | SiO                      | 3.098 | 3.104 | 2.885 | 1.589 | 2.854 | 5.314 | 2.871 | 3.834 | 8.529 | 10.368 | 2.704 |
| PMol333 | disiloxane               | 0.240 | 0.215 | 0.338 | 0.201 | 0.234 | 0.838 | 0.521 | 0.199 | 1.425 | 0.809  | 0.438 |
| PMol334 | methyl_silyl_ether       | 1.150 | 1.109 | 1.366 | 0.545 | 0.714 | 1.424 | 1.317 | 1.111 | 2.563 | 3.190  | 1.301 |
| PMol335 | hexamethyldisiloxane     | 0.780 | 0.467 | 0.713 | 0.140 | 0.277 | 1.015 | 0.826 | 0.478 | 1.299 | 0.141  | 0.748 |
| PMol336 | methoxytrimethylsilane   | 1.180 | 1.005 | 1.136 | 0.039 | 0.542 | 1.461 | 1.235 | 1.040 | 2.114 | 3.285  | 1.203 |
| PMol337 | methylsilanol            | 1.650 | 1.709 | 1.468 | 1.224 | 0.753 | 1.842 | 1.575 | 1.659 | 2.383 | 2.276  | 1.420 |
| PMol338 | silanediol               | 0.965 | 1.121 | 0.581 | 1.819 | 0.430 | 0.554 | 0.705 | 1.013 | 0.471 | 1.364  | 0.546 |
| PMol339 | silanone                 | 3.816 | 3.670 | 3.297 | 1.110 | 2.638 | 4.239 | 3.360 | 3.725 | 6.111 | 5.398  | 3.106 |
| PMol340 | silanole                 | 1.321 | 1.369 | 1.259 | 1.241 | 0.629 | 1.901 | 1.331 | 1.321 | 2.670 | 2.530  | 1.093 |
| PMol341 | fluorosilane             | 1.268 | 1.279 | 2.068 | 0.295 | 1.107 | 1.489 | 1.519 | 1.306 | 3.437 | 2.136  | 1.460 |
| PMol342 | difluorosilane           | 1.540 | 1.473 | 2.216 | 0.667 | 1.241 | 1.811 | 1.715 | 1.531 | 3.754 | 2.544  | 1.665 |
| PMol343 | trifluorosilane          | 1.260 | 1.318 | 1.898 | 0.837 | 1.119 | 1.668 | 1.570 | 1.375 | 3.125 | 2.191  | 1.537 |

|         |                          |       |       |       |       |       |       |       |       |       |       |       |
|---------|--------------------------|-------|-------|-------|-------|-------|-------|-------|-------|-------|-------|-------|
| PMol344 | fluoromethylsilane       | 1.710 | 1.729 | 2.290 | 0.492 | 1.314 | 1.437 | 1.840 | 1.725 | 3.242 | 2.000 | 1.831 |
| PMol345 | difluoromethylsilane     | 2.110 | 2.122 | 2.698 | 0.733 | 1.631 | 1.691 | 2.275 | 2.145 | 3.462 | 2.190 | 2.243 |
| PMol346 | trifluoromethylsilane    | 2.339 | 2.360 | 2.765 | 0.327 | 1.838 | 1.572 | 2.549 | 2.397 | 2.798 | 1.638 | 2.508 |
| PMol347 | fluorodisilane           | 1.230 | 1.271 | 2.037 | 0.387 | 1.203 | 1.406 | 1.612 | 1.271 | 3.510 | 2.751 | 1.532 |
| PMol348 | 1,1,1-trifluorodisilane  | 2.030 | 2.120 | 2.164 | 0.285 | 2.051 | 2.134 | 2.450 | 2.187 | 3.611 | 8.513 | 2.318 |
| PMol349 | chlorosilane             | 1.310 | 1.229 | 2.207 | 2.330 | 0.865 | 1.345 | 1.031 | 1.386 | 2.455 | 3.059 | 1.133 |
| PMol350 | dichlorosilane           | 1.170 | 1.121 | 2.210 | 3.090 | 0.810 | 1.403 | 1.003 | 1.291 | 2.569 | 3.333 | 1.151 |
| PMol351 | trichlorosilane          | 0.860 | 0.758 | 1.694 | 2.983 | 0.593 | 1.115 | 0.777 | 0.911 | 2.112 | 2.709 | 0.930 |
| PMol352 | chloro(methyl)silane     | 1.940 | 1.824 | 2.563 | 2.185 | 1.166 | 1.354 | 1.459 | 1.921 | 2.379 | 2.940 | 1.619 |
| PMol353 | trichloro(methyl)silane  | 1.910 | 1.907 | 2.769 | 2.363 | 1.242 | 0.919 | 1.658 | 1.974 | 1.644 | 2.359 | 1.820 |
| PMol354 | (chloromethyl)silane     | 1.626 | 1.671 | 1.898 | 1.588 | 0.962 | 0.837 | 1.231 | 1.767 | 2.246 | 3.371 | 1.525 |
| PMol355 | dichloro(ethyl)silane    | 2.040 | 2.065 | 2.850 | 2.865 | 1.295 | 1.548 | 1.699 | 2.150 | 2.294 | 3.082 | 1.807 |
| PMol356 | chlorotrimethylsilane    | 2.080 | 2.140 | 2.806 | 1.727 | 1.321 | 1.162 | 1.694 | 2.280 | 1.921 | 2.253 | 1.888 |
| PMol357 | dichloromethylsilane     | 1.995 | 1.956 | 2.878 | 2.798 | 1.266 | 1.335 | 1.630 | 2.067 | 2.351 | 3.078 | 1.810 |
| PMol358 | trichlorofluorosilane    | 0.490 | 0.575 | 0.446 | 2.423 | 0.638 | 0.370 | 0.908 | 0.532 | 1.558 | 0.240 | 0.654 |
| PMol359 | iodomethylsilane         | 1.862 | 1.956 | 2.195 | 0.419 | 1.285 | 1.336 | 1.244 | 2.146 | 1.540 | 2.258 | 1.264 |
| PMol360 | phosphine                | 0.574 | 0.617 | 0.616 | 0.057 | 0.149 | 0.396 | 0.752 | 0.628 | 0.092 | 5.671 | 0.860 |
| PMol361 | methylphosphine          | 1.100 | 1.169 | 0.587 | 1.098 | 0.281 | 0.673 | 0.880 | 1.125 | 0.806 | 5.727 | 1.157 |
| PMol362 | dimethyl_methylphosphona | 2.288 | 2.248 | 1.769 | 1.868 | 1.992 | 2.246 | 2.063 | 2.228 | 2.194 | 3.232 | 2.061 |
| PMol363 | hypophosphorous_acid     | 2.650 | 2.685 | 2.537 | 1.885 | 2.315 | 2.788 | 2.696 | 2.709 | 4.149 | 3.529 | 2.697 |
| PMol364 | trimethylphosphine       | 1.218 | 1.189 | 0.083 | 1.210 | 0.223 | 1.358 | 0.823 | 1.139 | 1.872 | 6.534 | 0.976 |
| PMol365 | dimethylphosphine        | 1.230 | 1.263 | 0.323 | 1.252 | 0.233 | 0.996 | 0.872 | 1.266 | 1.381 | 6.056 | 1.134 |
| PMol366 | PH                       | 0.429 | 0.454 | 0.347 | 0.260 | 0.192 | 0.432 | 0.346 | 0.437 | 0.792 | 3.558 | 0.366 |
| PMol367 | CH2PH2                   | 0.503 | 0.429 | 0.244 | 1.749 | 0.337 | 1.068 | 0.512 | 0.457 | 1.634 | 6.170 | 0.674 |
| PMol368 | CH3CH(PH2)CH3            | 1.249 | 1.248 | 0.575 | 1.449 | 0.309 | 0.666 | 0.936 | 1.226 | 0.807 | 5.626 | 1.276 |
| PMol369 | CH3PH                    | 1.297 | 1.315 | 0.706 | 1.244 | 0.237 | 0.597 | 0.887 | 1.280 | 1.131 | 5.125 | 1.157 |
| PMol370 | (CH3)3PH2                | 1.226 | 1.221 | 0.536 | 1.445 | 0.314 | 0.635 | 0.941 | 1.207 | 0.839 | 5.556 | 1.292 |
| PMol371 | CH3CH(PH)CH3             | 1.414 | 1.409 | 0.766 | 1.620 | 0.223 | 0.662 | 0.940 | 1.378 | 1.199 | 4.943 | 1.256 |
| PMol372 | phosphorus_mononitride   | 2.747 | 2.879 | 1.808 | 2.669 | 1.816 | 3.664 | 2.305 | 2.893 | 5.992 | 9.975 | 2.465 |
| PMol373 | phosphorus_oxychloride   | 2.540 | 2.497 | 1.730 | 4.054 | 2.193 | 2.827 | 2.782 | 2.501 | 4.262 | 3.081 | 2.550 |
| PMol374 | thiophosphoryl_fluorid   | 0.640 | 0.554 | 0.045 | 0.121 | 0.407 | 1.297 | 0.257 | 0.645 | 1.179 | 0.301 | 0.345 |
| PMol375 | hypophosphorous_acid(=Mo | 2.650 | 2.685 | 2.537 | 1.885 | 2.315 | 2.788 | 2.696 | 2.709 | 4.149 | 3.529 | 2.697 |
| PMol376 | methylphosphonic_acid    | 1.526 | 1.459 | 1.340 | 1.670 | 1.849 | 0.919 | 1.324 | 1.535 | 1.016 | 1.558 | 1.591 |
| PMol377 | phosphine_oxide          | 3.666 | 3.599 | 3.888 | 2.130 | 2.801 | 4.227 | 3.739 | 3.637 | 6.417 | 5.310 | 3.688 |
| PMol378 | OPH                      | 2.374 | 2.368 | 2.694 | 1.763 | 2.051 | 3.910 | 2.277 | 2.429 | 6.270 | 9.151 | 2.223 |
| PMol379 | hydroxyphosphane         | 0.768 | 0.839 | 1.440 | 0.949 | 1.018 | 3.034 | 0.979 | 0.812 | 3.955 | 8.481 | 0.709 |
| PMol380 | trimethylphosphine_oxide | 4.407 | 4.289 | 4.321 | 2.147 | 3.375 | 4.129 | 4.435 | 4.346 | 5.769 | 4.822 | 4.462 |
| PMol381 | PO                       | 2.072 | 2.107 | 2.337 | 1.746 | 1.923 | 3.559 | 1.983 | 2.137 | 6.421 | 9.075 | 1.985 |
| PMol382 | phosphorus_trichloride   | 0.560 | 0.565 | 2.142 | 1.267 | 1.090 | 2.573 | 0.619 | 0.625 | 3.457 | 7.123 | 0.832 |
| PMol383 | phosphorus_trifluoride   | 1.030 | 1.089 | 2.711 | 0.547 | 1.613 | 3.921 | 1.421 | 1.098 | 6.370 | 9.128 | 1.517 |
| PMol384 | phosphoryl_fluoride      | 1.869 | 1.854 | 0.860 | 1.839 | 1.440 | 2.209 | 1.717 | 1.860 | 1.755 | 2.037 | 1.657 |



|          |                          |       |       |       |       |       |       |       |       |       |        |       |
|----------|--------------------------|-------|-------|-------|-------|-------|-------|-------|-------|-------|--------|-------|
| PMol1385 | FCP                      | 0.279 | 0.062 | 0.471 | 0.740 | 0.150 | 0.196 | 0.205 | 0.012 | 4.165 | 11.718 | 0.210 |
| PMol1386 | CH3P(O)(OCH3)(SCH3)      | 1.622 | 1.582 | 1.342 | 3.363 | 2.009 | 2.468 | 2.011 | 1.557 | 3.564 | 4.553  | 1.739 |
| PMol1387 | CH3P(O)(SCH3)2           | 1.590 | 1.578 | 1.743 | 4.579 | 2.182 | 2.766 | 2.232 | 1.534 | 4.964 | 5.105  | 1.915 |
| PMol1388 | OP(OCH3)(SCH3)2          | 2.851 | 2.885 | 2.944 | 4.629 | 2.976 | 4.211 | 3.615 | 2.823 | 7.143 | 8.860  | 3.235 |
| PMol1389 | trimethylphosphine_sulfi | 4.796 | 4.691 | 5.075 | 1.254 | 3.653 | 4.181 | 4.343 | 4.896 | 4.003 | 3.772  | 4.694 |
| PMol1390 | PS                       | 0.626 | 0.664 | 1.232 | 0.450 | 0.754 | 1.320 | 0.443 | 0.692 | 2.491 | 7.285  | 0.525 |
| PMol1391 | SP(CH3)(OCH3)2           | 2.521 | 2.481 | 2.270 | 0.799 | 1.968 | 2.692 | 1.728 | 2.555 | 2.217 | 4.760  | 1.974 |
| PMol1392 | SH                       | 0.779 | 0.864 | 0.963 | 0.038 | 0.312 | 0.617 | 0.732 | 0.960 | 0.571 | 0.047  | 0.775 |
| PMol1393 | CH2SH                    | 0.858 | 0.879 | 0.811 | 2.673 | 0.467 | 0.931 | 0.777 | 0.913 | 1.215 | 0.935  | 0.917 |
| PMol1394 | ethenethiol              | 0.759 | 0.753 | 0.364 | 2.607 | 0.194 | 0.330 | 0.572 | 0.807 | 0.605 | 0.429  | 0.846 |
| PMol1395 | methanethiol             | 1.520 | 1.549 | 1.428 | 1.432 | 0.547 | 0.625 | 1.125 | 1.617 | 0.672 | 0.517  | 1.501 |
| PMol1396 | ethanethiol_(gauche)     | 1.610 | 1.633 | 1.486 | 1.598 | 0.573 | 0.664 | 1.166 | 1.683 | 0.735 | 0.692  | 1.589 |
| PMol1397 | ethanethiol_(trans)      | 1.580 | 1.635 | 1.403 | 1.529 | 0.586 | 0.821 | 1.142 | 1.657 | 0.731 | 0.871  | 1.591 |
| PMol1398 | 1-propane_thiol          | 1.600 | 1.695 | 1.518 | 1.465 | 0.645 | 0.742 | 1.239 | 1.741 | 0.753 | 0.735  | 1.646 |
| PMol1399 | 2-methyl-2-propane_thiol | 1.660 | 1.657 | 1.543 | 1.601 | 0.528 | 0.507 | 1.148 | 1.752 | 0.801 | 0.950  | 1.641 |
| PMol1400 | HSSH                     | 1.122 | 1.218 | 1.284 | 0.125 | 0.416 | 0.841 | 1.019 | 1.285 | 1.029 | 0.147  | 1.106 |
| PMol1401 | CH3SSH                   | 1.720 | 1.747 | 1.659 | 1.548 | 0.579 | 0.603 | 1.234 | 1.759 | 0.812 | 0.576  | 1.595 |
| PMol1402 | 2-propanethiol           | 1.682 | 1.647 | 1.578 | 1.692 | 0.545 | 0.484 | 1.172 | 1.729 | 0.799 | 0.757  | 1.611 |
| PMol1403 | thioacetone              | 2.899 | 2.852 | 3.074 | 0.706 | 1.864 | 2.059 | 2.512 | 2.949 | 1.268 | 1.128  | 2.778 |
| PMol1404 | CH3S_radical             | 1.699 | 1.708 | 1.595 | 1.532 | 0.668 | 0.457 | 1.189 | 1.746 | 0.355 | 0.450  | 1.506 |
| PMol1405 | 1,3-dithiane             | 2.162 | 2.124 | 1.838 | 2.472 | 0.699 | 0.585 | 1.567 | 2.182 | 0.385 | 0.586  | 2.166 |
| PMol1406 | (CH3)3CS_radical         | 1.897 | 1.851 | 1.767 | 1.740 | 0.620 | 0.220 | 1.206 | 1.904 | 0.439 | 0.881  | 1.617 |
| PMol1407 | ethyl_methyl_sulfide     | 1.593 | 1.585 | 1.220 | 1.793 | 0.436 | 0.259 | 1.077 | 1.608 | 0.119 | 0.228  | 1.478 |
| PMol1408 | ethyl_methyl_sulfide     | 1.560 | 1.557 | 1.099 | 1.857 | 0.417 | 0.270 | 1.047 | 1.550 | 0.123 | 0.334  | 1.480 |
| PMol1409 | dimethyl_sulfide         | 1.554 | 1.538 | 1.179 | 1.731 | 0.431 | 0.108 | 1.069 | 1.559 | 0.056 | 0.062  | 1.452 |
| PMol1410 | diethyl_sulfide          | 1.540 | 1.569 | 1.037 | 1.975 | 0.394 | 0.424 | 1.023 | 1.494 | 0.121 | 0.085  | 1.503 |
| PMol1411 | hydrogen_sulfide         | 0.978 | 1.111 | 1.318 | 0.223 | 0.456 | 1.051 | 1.044 | 1.265 | 1.215 | 0.177  | 1.171 |
| PMol1412 | thietane                 | 1.850 | 1.941 | 1.492 | 2.206 | 0.750 | 0.682 | 1.424 | 1.999 | 0.283 | 0.675  | 1.980 |
| PMol1413 | thiacyclohexane          | 1.781 | 1.782 | 1.584 | 2.060 | 0.565 | 0.458 | 1.230 | 1.746 | 0.203 | 0.564  | 1.728 |
| PMol1414 | dimethyl_disulfide       | 2.011 | 2.007 | 1.710 | 2.181 | 0.594 | 0.086 | 1.331 | 2.047 | 0.309 | 0.293  | 1.827 |
| PMol1415 | thiophene                | 0.550 | 0.452 | 0.076 | 4.067 | 0.392 | 0.795 | 0.194 | 0.446 | 1.830 | 0.801  | 0.668 |
| PMol1416 | 2-methylthiophene        | 0.674 | 0.632 | 0.700 | 4.211 | 0.634 | 0.896 | 0.522 | 0.645 | 1.829 | 1.093  | 0.763 |
| PMol1417 | 2,5-dihydrothiophene     | 1.750 | 1.755 | 1.032 | 2.591 | 0.641 | 0.699 | 1.197 | 1.761 | 0.518 | 0.482  | 1.848 |
| PMol1418 | 3-methylthiophene        | 0.914 | 0.847 | 0.381 | 3.388 | 0.140 | 0.525 | 0.634 | 0.848 | 1.512 | 0.466  | 1.005 |
| PMol1419 | carbon_monosulfide       | 1.958 | 1.932 | 0.601 | 4.080 | 0.642 | 1.223 | 0.477 | 1.857 | 1.283 | 5.275  | 0.303 |
| PMol1420 | methyl_isothiocyanate    | 3.453 | 3.874 | 4.987 | 0.583 | 3.247 | 3.904 | 3.784 | 3.937 | 2.380 | 2.992  | 4.049 |
| PMol1421 | carbon_oxide_sulfide     | 0.715 | 0.812 | 0.366 | 1.844 | 0.493 | 0.546 | 0.589 | 0.674 | 2.659 | 10.203 | 0.727 |
| PMol1422 | thioformaldehyde         | 1.649 | 1.688 | 1.743 | 1.936 | 0.940 | 1.114 | 1.463 | 1.743 | 0.279 | 2.735  | 1.704 |
| PMol1423 | propanethial_S-oxide     | 3.350 | 3.966 | 4.450 | 2.656 | 3.210 | 4.410 | 3.956 | 3.943 | 6.160 | 8.715  | 4.050 |
| PMol1424 | thioacetaldehyde         | 2.330 | 2.458 | 2.646 | 1.339 | 1.577 | 1.827 | 2.158 | 2.519 | 1.001 | 1.845  | 2.416 |
| PMol1425 | methylthiocyanate        | 3.340 | 4.280 | 2.505 | 3.777 | 3.183 | 3.739 | 4.028 | 4.274 | 4.514 | 11.182 | 4.038 |

|         |                           |       |       |       |       |       |       |       |       |       |        |       |
|---------|---------------------------|-------|-------|-------|-------|-------|-------|-------|-------|-------|--------|-------|
| PMol426 | thiazole                  | 1.650 | 1.642 | 1.304 | 4.096 | 1.257 | 2.080 | 1.770 | 1.628 | 3.754 | 5.168  | 1.518 |
| PMol427 | methanesulfonic_acid      | 3.805 | 3.803 | 3.780 | 2.054 | 2.893 | 3.573 | 3.792 | 3.794 | 4.763 | 8.025  | 3.768 |
| PMol428 | methyl_methanesulfenate   | 1.964 | 1.970 | 2.001 | 1.892 | 0.918 | 1.392 | 1.753 | 2.006 | 2.925 | 4.323  | 1.856 |
| PMol429 | methyl_methanesulfinate   | 2.706 | 2.654 | 3.160 | 2.228 | 2.341 | 4.184 | 2.695 | 2.592 | 5.848 | 8.234  | 2.856 |
| PMol430 | methane_sulfonamide       | 3.526 | 3.405 | 3.605 | 2.111 | 2.964 | 2.813 | 3.273 | 3.408 | 4.288 | 7.113  | 3.246 |
| PMol431 | dicyanogen_sulfide        | 3.020 | 3.083 | 0.811 | 3.455 | 2.221 | 3.233 | 2.874 | 2.953 | 3.858 | 11.197 | 2.689 |
| PMol432 | dimethyl_sulfone          | 4.470 | 4.464 | 4.647 | 2.135 | 3.432 | 4.174 | 4.506 | 4.483 | 5.910 | 9.872  | 4.628 |
| PMol433 | dimethyl_sulfoxide        | 3.960 | 3.912 | 4.417 | 2.612 | 3.100 | 4.513 | 3.893 | 3.931 | 6.589 | 9.219  | 4.061 |
| PMol434 | HCl                       | 1.109 | 1.232 | 1.418 | 0.276 | 0.745 | 1.536 | 1.088 | 1.378 | 1.578 | 1.716  | 1.207 |
| PMol435 | chloromethane             | 1.893 | 1.898 | 2.039 | 1.427 | 1.141 | 1.224 | 1.501 | 1.967 | 1.562 | 2.613  | 1.788 |
| PMol436 | dichloromethane           | 1.600 | 1.642 | 1.863 | 2.044 | 0.988 | 1.336 | 1.394 | 1.806 | 1.447 | 2.603  | 1.764 |
| PMol437 | trichloromethane          | 1.040 | 1.078 | 1.293 | 1.946 | 0.671 | 1.081 | 1.018 | 1.260 | 1.005 | 1.970  | 1.354 |
| PMol438 | chloroethane              | 2.050 | 2.073 | 2.151 | 1.405 | 1.259 | 1.389 | 1.625 | 2.141 | 1.808 | 2.898  | 1.910 |
| PMol439 | 1,1-dichloroethane        | 2.060 | 2.052 | 2.226 | 2.010 | 1.223 | 1.232 | 1.660 | 2.140 | 1.835 | 3.306  | 1.966 |
| PMol440 | 1,1,1-trichloroethane     | 1.755 | 1.801 | 1.888 | 1.995 | 1.024 | 0.487 | 1.454 | 1.862 | 1.499 | 3.286  | 1.627 |
| PMol441 | pentachloroethane         | 0.920 | 0.887 | 1.255 | 2.035 | 0.566 | 0.847 | 0.913 | 1.015 | 0.972 | 1.857  | 1.266 |
| PMol442 | cyclopropylchloride       | 1.780 | 1.911 | 1.875 | 1.844 | 1.158 | 1.147 | 1.498 | 1.996 | 1.505 | 2.843  | 1.830 |
| PMol443 | 1-chloropropane(gauche)   | 2.020 | 2.056 | 2.133 | 1.534 | 1.205 | 1.417 | 1.577 | 2.101 | 1.788 | 2.851  | 1.906 |
| PMol444 | 1-chloropropane(trans)    | 1.950 | 2.143 | 2.161 | 1.231 | 1.372 | 1.434 | 1.748 | 2.216 | 1.877 | 2.999  | 1.994 |
| PMol445 | 1,3-dichloropropane       | 2.080 | 1.843 | 2.005 | 1.725 | 1.112 | 1.560 | 1.517 | 1.926 | 1.727 | 2.463  | 1.937 |
| PMol446 | 2-chloropropane           | 2.170 | 2.178 | 2.257 | 1.330 | 1.307 | 1.296 | 1.691 | 2.279 | 2.046 | 3.042  | 1.966 |
| PMol447 | 1-chloro-2-methylpropane  | 2.000 | 2.059 | 2.135 | 1.281 | 1.280 | 1.333 | 1.675 | 2.125 | 1.907 | 2.874  | 1.941 |
| PMol448 | 2-chlorobutane            | 2.040 | 2.141 | 2.223 | 1.440 | 1.243 | 1.284 | 1.633 | 2.226 | 2.017 | 2.951  | 1.956 |
| PMol449 | 1-chlorobutane            | 2.050 | 2.229 | 2.207 | 1.325 | 1.445 | 1.560 | 1.812 | 2.285 | 1.911 | 3.111  | 2.074 |
| PMol450 | 2-chloro-2-methylpropane  | 2.130 | 2.246 | 2.401 | 1.148 | 1.323 | 1.098 | 1.734 | 2.358 | 2.174 | 3.128  | 1.989 |
| PMol451 | 1-chloropentane           | 2.160 | 2.244 | 2.159 | 1.139 | 1.489 | 1.536 | 1.862 | 2.310 | 1.964 | 3.140  | 2.098 |
| PMol452 | chlorocyclohexane(axial)  | 1.910 | 2.126 | 2.177 | 1.429 | 1.226 | 1.352 | 1.626 | 2.175 | 2.027 | 2.947  | 1.957 |
| PMol453 | chlorocyclohexane(equato) | 2.440 | 2.447 | 2.468 | 1.337 | 1.560 | 1.737 | 1.929 | 2.521 | 2.098 | 3.397  | 2.209 |
| PMol454 | chloroethene              | 1.450 | 1.366 | 1.409 | 2.255 | 0.783 | 0.876 | 1.116 | 1.432 | 1.099 | 2.588  | 1.458 |
| PMol455 | 1,1-dichloroethene        | 1.340 | 1.230 | 1.326 | 2.809 | 0.627 | 0.360 | 0.989 | 1.298 | 0.891 | 3.018  | 1.304 |
| PMol456 | Z-1,2-dichloroethene      | 1.900 | 1.778 | 2.172 | 4.136 | 1.006 | 1.249 | 1.563 | 1.908 | 1.513 | 3.470  | 2.246 |
| PMol457 | 1-chloropropene(cis)      | 1.670 | 1.598 | 1.641 | 2.349 | 0.931 | 1.073 | 1.270 | 1.584 | 1.372 | 2.742  | 1.629 |
| PMol458 | 1-chloropropene(trans)    | 1.970 | 1.884 | 1.974 | 1.587 | 1.263 | 1.243 | 1.644 | 1.958 | 1.446 | 3.148  | 1.906 |
| PMol459 | 2-chloropropene           | 1.647 | 1.594 | 1.678 | 2.135 | 0.940 | 0.774 | 1.294 | 1.697 | 1.284 | 2.828  | 1.570 |
| PMol460 | 3-chloropropene           | 1.940 | 1.846 | 1.915 | 1.855 | 1.072 | 1.422 | 1.445 | 1.895 | 1.701 | 2.493  | 1.851 |
| PMol461 | chlorobenzene             | 1.690 | 1.667 | 1.597 | 2.229 | 1.025 | 1.199 | 1.355 | 1.764 | 1.314 | 3.030  | 1.728 |
| PMol462 | 1,2-dichlorobenzene       | 2.500 | 2.363 | 2.119 | 4.278 | 1.416 | 1.597 | 1.989 | 2.527 | 1.898 | 4.789  | 2.673 |
| PMol463 | 1,3-dichlorobenzene       | 1.720 | 1.563 | 1.495 | 2.365 | 0.926 | 1.113 | 1.260 | 1.655 | 1.256 | 2.927  | 1.643 |
| PMol464 | ortho-chlorotoluene       | 1.560 | 1.415 | 1.302 | 2.870 | 0.728 | 0.828 | 1.037 | 1.498 | 1.114 | 2.721  | 1.456 |
| PMol465 | para-chlorotoluene        | 2.210 | 2.135 | 2.320 | 1.315 | 1.487 | 1.410 | 1.895 | 2.241 | 1.722 | 3.529  | 2.157 |
| PMol466 | chloroacetylene           | 0.444 | 0.266 | 1.102 | 3.579 | 0.092 | 0.162 | 0.198 | 0.337 | 0.002 | 2.279  | 0.590 |

|          |                          |       |       |       |       |       |       |       |       |       |        |       |
|----------|--------------------------|-------|-------|-------|-------|-------|-------|-------|-------|-------|--------|-------|
| PMol1467 | 3-chloropropyne          | 1.680 | 1.692 | 2.489 | 1.898 | 1.011 | 1.258 | 1.346 | 1.807 | 1.648 | 2.517  | 1.710 |
| PMol1468 | chlorofluoromethane      | 1.820 | 1.791 | 2.083 | 1.832 | 1.156 | 1.731 | 1.637 | 1.888 | 2.817 | 4.393  | 1.900 |
| PMol1469 | chlorodifluoromethane    | 1.420 | 1.421 | 1.539 | 1.947 | 0.948 | 1.608 | 1.401 | 1.523 | 2.687 | 4.603  | 1.618 |
| PMol1470 | fluorotrifluoromethane   | 0.460 | 0.367 | 0.490 | 1.694 | 0.256 | 0.403 | 0.431 | 0.301 | 2.141 | 2.993  | 0.137 |
| PMol1471 | chloropentafluoroethane  | 0.520 | 0.498 | 0.550 | 2.097 | 0.391 | 0.581 | 0.588 | 0.414 | 1.992 | 3.121  | 0.193 |
| PMol1472 | 1-chloro-1-fluoroethane  | 2.068 | 2.199 | 2.444 | 1.683 | 1.434 | 1.633 | 1.950 | 2.273 | 3.194 | 4.950  | 2.136 |
| PMol1473 | 1,1-dichloro-2-fluoropro | 2.430 | 1.934 | 2.371 | 2.082 | 1.281 | 1.187 | 1.773 | 1.976 | 2.800 | 4.809  | 1.943 |
| PMol1474 | chlorotrifluoromethane   | 0.500 | 0.395 | 0.471 | 1.800 | 0.272 | 0.355 | 0.460 | 0.334 | 1.723 | 3.043  | 0.113 |
| PMol1475 | dichlorofluoromethane    | 1.290 | 1.256 | 1.463 | 2.256 | 0.829 | 1.374 | 1.242 | 1.406 | 2.435 | 3.846  | 1.497 |
| PMol1476 | 1-chloro-1,1-difluoroeth | 2.140 | 2.189 | 2.279 | 1.560 | 1.463 | 1.314 | 2.014 | 2.240 | 3.427 | 5.798  | 2.022 |
| PMol1477 | acetylchloride           | 2.720 | 2.824 | 2.729 | 1.592 | 2.023 | 2.375 | 2.644 | 2.852 | 3.656 | 7.147  | 2.743 |
| PMol1478 | phosgene                 | 1.170 | 1.318 | 0.678 | 2.703 | 0.997 | 1.588 | 1.294 | 1.241 | 2.695 | 4.991  | 1.095 |
| PMol1479 | para-chlorophenol        | 2.110 | 2.252 | 2.090 | 0.776 | 1.521 | 1.868 | 2.024 | 2.308 | 1.773 | 2.207  | 1.909 |
| PMol1480 | cyanogen_chloride        | 2.833 | 3.044 | 0.756 | 4.275 | 2.063 | 2.855 | 2.776 | 2.923 | 2.998 | 6.120  | 2.446 |
| PMol1481 | 1-chloro-2-nitrobenzene  | 4.640 | 4.867 | 4.635 | 2.893 | 3.685 | 4.811 | 4.601 | 4.939 | 5.968 | 9.157  | 4.997 |
| PMol1482 | 1-chloro-3-nitrobenzene  | 3.730 | 3.978 | 4.103 | 4.301 | 3.051 | 4.054 | 3.699 | 3.976 | 5.141 | 6.898  | 3.687 |
| PMol1483 | 1-chloro-4-nitrobenzene  | 2.830 | 3.308 | 3.460 | 5.217 | 2.802 | 3.716 | 3.237 | 3.262 | 4.757 | 5.306  | 2.913 |
| PMol1587 | HBr                      | 0.827 | 0.919 | 1.313 | 0.328 | 0.612 | 1.189 | 0.912 | 1.110 | 1.340 | 0.818  | 0.828 |
| PMol1588 | bromomethane             | 1.820 | 1.895 | 1.807 | 1.208 | 1.020 | 0.882 | 1.242 | 1.983 | 1.149 | 1.608  | 1.685 |
| PMol1589 | dibromomethane           | 1.430 | 1.499 | 1.564 | 1.778 | 0.793 | 0.828 | 1.050 | 1.641 | 0.872 | 1.376  | 1.543 |
| PMol1590 | bromoform                | 0.990 | 0.898 | 1.044 | 1.640 | 0.485 | 0.751 | 0.711 | 1.118 | 0.456 | 0.917  | 1.107 |
| PMol1591 | bromoethane              | 2.040 | 2.151 | 2.043 | 1.154 | 1.169 | 1.152 | 1.392 | 2.259 | 1.458 | 2.016  | 1.917 |
| PMol1592 | 1-bromopropane           | 2.180 | 2.238 | 2.081 | 0.978 | 1.292 | 1.232 | 1.523 | 2.349 | 1.519 | 2.124  | 2.013 |
| PMol1593 | 2-bromopropane           | 2.210 | 2.302 | 2.238 | 1.064 | 1.228 | 1.093 | 1.467 | 2.448 | 1.697 | 2.223  | 2.063 |
| PMol1594 | 1-bromobutane            | 2.080 | 2.335 | 2.141 | 1.067 | 1.377 | 1.366 | 1.599 | 2.411 | 1.558 | 2.246  | 2.106 |
| PMol1595 | 2-bromobutane            | 2.230 | 2.281 | 2.227 | 1.148 | 1.164 | 1.086 | 1.409 | 2.393 | 1.685 | 2.154  | 2.064 |
| PMol1596 | 1-bromopentane           | 2.200 | 2.357 | 2.106 | 0.876 | 1.429 | 1.353 | 1.658 | 2.457 | 1.612 | 2.297  | 2.140 |
| PMol1597 | 1-bromoheptane           | 2.160 | 2.409 | 2.122 | 0.832 | 1.483 | 1.402 | 1.711 | 2.511 | 1.650 | 2.359  | 2.190 |
| PMol1598 | bromoethene              | 1.420 | 1.423 | 1.161 | 2.015 | 0.697 | 0.660 | 0.876 | 1.536 | 0.688 | 1.431  | 1.386 |
| PMol1599 | bromobenzene             | 1.700 | 1.775 | 1.528 | 1.986 | 0.965 | 1.059 | 1.134 | 1.929 | 0.907 | 1.902  | 1.750 |
| PMol1600 | bromoacetylene           | 0.230 | 0.166 | 0.532 | 3.468 | 0.311 | 0.463 | 0.194 | 0.250 | 0.600 | 0.023  | 0.224 |
| PMol1601 | 3-bromopropyne           | 1.540 | 1.665 | 2.209 | 1.735 | 0.872 | 0.945 | 1.068 | 1.830 | 1.228 | 1.551  | 1.665 |
| PMol1602 | bromotrifluoromethane    | 0.650 | 0.436 | 0.565 | 1.491 | 0.387 | 0.544 | 0.743 | 0.317 | 1.967 | 4.156  | 0.131 |
| PMol1603 | dibromodifluoromethane   | 0.660 | 0.465 | 0.642 | 1.615 | 0.413 | 0.645 | 0.804 | 0.377 | 2.728 | 4.735  | 0.175 |
| PMol1604 | hydrogen_iodide          | 0.448 | 0.462 | 0.930 | 0.127 | 0.496 | 0.889 | 0.748 | 0.746 | 0.745 | 0.605  | 0.402 |
| PMol1605 | iodine_monofluoride      | 1.948 | 2.066 | 3.327 | 3.019 | 1.721 | 2.502 | 2.127 | 1.846 | 4.777 | 5.352  | 1.553 |
| PMol1606 | iodine_monochloride      | 1.240 | 1.167 | 2.105 | 0.719 | 0.909 | 1.266 | 1.182 | 1.007 | 2.551 | 3.489  | 0.822 |
| PMol1607 | iodine_monobromide       | 0.726 | 0.750 | 1.455 | 0.767 | 0.491 | 0.671 | 0.615 | 0.738 | 1.577 | 2.137  | 0.570 |
| PMol1608 | cyanic_iodide            | 3.670 | 3.816 | 2.701 | 4.754 | 2.719 | 3.549 | 3.752 | 3.599 | 4.766 | 10.330 | 3.462 |
| PMol1609 | iodomethane              | 1.641 | 1.684 | 1.204 | 1.566 | 0.950 | 0.651 | 1.054 | 1.836 | 0.372 | 0.086  | 1.487 |
| PMol1610 | iodoacetylene            | 0.025 | 0.151 | 0.735 | 3.987 | 0.466 | 0.704 | 0.497 | 0.030 | 1.683 | 2.479  | 0.108 |

|         |             |       |       |       |       |       |       |       |       |       |       |       |
|---------|-------------|-------|-------|-------|-------|-------|-------|-------|-------|-------|-------|-------|
| PMol611 | iodoethene  | 1.311 | 1.254 | 0.540 | 2.372 | 0.659 | 0.532 | 0.711 | 1.414 | 0.205 | 0.484 | 1.220 |
| PMol612 | iodoethane  | 1.976 | 2.019 | 1.561 | 1.457 | 1.135 | 1.009 | 1.239 | 2.180 | 0.754 | 0.666 | 1.773 |
| PMol613 | iodopropane | 2.040 | 2.121 | 1.616 | 1.298 | 1.263 | 1.109 | 1.375 | 2.273 | 0.777 | 0.790 | 1.872 |
| PMol614 | iodobenzene | 1.700 | 1.647 | 0.846 | 2.384 | 0.934 | 0.972 | 0.970 | 1.819 | 0.015 | 0.159 | 1.620 |

DEN. reference data

| Mul.      | Low. | Hir. | I-H | CM5 | ESP | NPA | AIM    | ACP    |        |        |        |       |       |       |        |
|-----------|------|------|-----|-----|-----|-----|--------|--------|--------|--------|--------|-------|-------|-------|--------|
| Deviation |      |      |     |     |     |     | -0.193 | -0.622 | -0.689 | -0.187 | -0.155 | 0.030 | 0.520 | 2.243 | -0.084 |
| Abs. dev. |      |      |     |     |     |     | 0.482  | 1.151  | 0.717  | 0.447  | 0.223  | 0.056 | 0.919 | 2.475 | 0.186  |
| Disp.     |      |      |     |     |     |     | 0.673  | 1.425  | 0.806  | 0.606  | 0.292  | 0.108 | 1.209 | 3.184 | 0.274  |

Exp. reference data

| Den.      | Mul. | Low. | Hir. | I-H | CM5 | ESP   | NPA    | AIM    | ACP    |        |        |       |       |       |        |
|-----------|------|------|------|-----|-----|-------|--------|--------|--------|--------|--------|-------|-------|-------|--------|
| Deviation |      |      |      |     |     | 0.039 | -0.153 | -0.583 | -0.649 | -0.148 | -0.116 | 0.070 | 0.559 | 2.282 | -0.045 |
| Abs. dev. |      |      |      |     |     | 0.109 | 0.455  | 1.112  | 0.679  | 0.446  | 0.221  | 0.132 | 0.919 | 2.501 | 0.177  |
| Disp.     |      |      |      |     |     | 0.163 | 0.633  | 1.379  | 0.766  | 0.604  | 0.295  | 0.196 | 1.216 | 3.225 | 0.273  |

Number of molecules 411

M E T A L S

Dipole moments in D

| Molecule |           | Exp.  | Den.  | Mul.  | Low.  | Hir.  | I-H    | CM5   | ESP   | NPA    | AIM    | ACP   |
|----------|-----------|-------|-------|-------|-------|-------|--------|-------|-------|--------|--------|-------|
| Met001   | LiF       | 6.327 | 6.032 | 5.530 | 4.476 | 4.279 | 6.963  | 5.418 | 6.058 | 6.990  | 6.660  | 4.946 |
| Met003   | LiS       | 6.893 | 6.806 | 6.652 | 3.891 | 4.768 | 8.873  | 5.756 | 6.877 | 8.860  | 9.024  | 6.785 |
| Met004   | LiCl      | 7.129 | 6.859 | 6.662 | 4.164 | 5.026 | 8.773  | 5.924 | 6.965 | 8.807  | 8.645  | 6.352 |
| Met005   | LiBr      | 7.268 | 7.086 | 7.339 | 4.404 | 5.200 | 9.338  | 5.883 | 7.507 | 9.453  | 9.390  | 6.834 |
| Met006   | LiI       | 7.428 | 7.336 | 7.885 | 4.640 | 5.644 | 10.000 | 6.102 | 7.724 | 10.246 | 10.405 | 7.297 |
| Met007   | LiOH      | 4.497 | 4.109 | 3.981 | 3.528 | 3.396 | 5.526  | 4.133 | 4.085 | 5.095  | 4.200  | 3.878 |
| Met008   | LiSH      | 6.840 | 6.736 | 6.554 | 4.203 | 4.869 | 9.068  | 5.841 | 6.843 | 8.957  | 9.104  | 6.961 |
| Met009   | LiNH2     | 4.790 | 4.387 | 4.441 | 3.551 | 3.693 | 5.864  | 4.448 | 4.369 | 5.588  | 5.536  | 4.721 |
| Met010   | LiCH3     | 5.703 | 5.516 | 6.071 | 4.630 | 4.674 | 7.556  | 4.915 | 5.424 | 6.712  | 8.572  | 6.074 |
| Met011   | LiCH3O    | 3.684 | 3.585 | 4.271 | 3.726 | 3.186 | 5.675  | 3.573 | 3.462 | 4.557  | 4.944  | 4.015 |
| Met012   | LiOCH3    | 5.271 | 5.040 | 4.165 | 5.143 | 4.231 | 5.747  | 5.071 | 4.977 | 5.236  | 3.689  | 4.463 |
| Met013   | LiC2H     | 6.024 | 5.909 | 8.571 | 5.420 | 5.161 | 7.268  | 5.549 | 5.850 | 8.416  | 9.891  | 6.186 |
| Met014   | LiC3H5    | 3.796 | 3.574 | 5.188 | 3.782 | 3.123 | 6.705  | 4.070 | 3.624 | 6.447  | 6.944  | 4.840 |
| Met015   | LiC2H2F   | 4.451 | 4.242 | 6.249 | 3.931 | 3.811 | 6.549  | 4.749 | 4.165 | 7.117  | 6.866  | 4.986 |
| Met016   | LiC2H6N   | 5.646 | 5.437 | 4.753 | 4.917 | 4.610 | 6.425  | 5.433 | 5.303 | 6.336  | 5.761  | 5.369 |
| Met017   | CH3HNLi   | 5.001 | 4.923 | 4.526 | 4.621 | 4.274 | 6.196  | 5.035 | 4.901 | 6.064  | 5.788  | 5.083 |
| Met018   | (CH3)2NLi | 5.553 | 5.491 | 4.798 | 4.995 | 4.659 | 6.499  | 5.420 | 5.357 | 6.448  | 5.888  | 5.435 |

|        |              |       |       |       |       |       |        |       |       |        |        |       |
|--------|--------------|-------|-------|-------|-------|-------|--------|-------|-------|--------|--------|-------|
| Met019 | CH3-OLi      | 5.069 | 4.982 | 4.105 | 5.058 | 4.171 | 5.692  | 5.009 | 4.911 | 5.208  | 3.732  | 4.428 |
| Met020 | Li+_CH3      | 6.447 | 6.576 | 7.227 | 6.349 | 5.773 | 7.895  | 5.944 | 6.595 | 7.738  | 7.670  | 6.662 |
| Met021 | Li+_C2H5     | 7.867 | 7.974 | 8.625 | 7.780 | 7.197 | 9.365  | 7.377 | 7.874 | 9.317  | 9.094  | 8.211 |
| Met022 | Li+_C2H3     | 6.612 | 6.712 | 7.597 | 6.630 | 5.896 | 8.329  | 6.187 | 6.728 | 8.407  | 8.099  | 6.902 |
| Met023 | Li+_propene  | 7.727 | 7.822 | 8.713 | 7.796 | 6.915 | 9.574  | 7.282 | 7.643 | 9.542  | 9.274  | 8.157 |
| Met024 | Li+_propyne  | 7.270 | 7.393 | 8.515 | 7.312 | 6.377 | 9.003  | 6.822 | 7.296 | 9.158  | 8.654  | 7.492 |
| Met025 | Li(NH3)+     | 4.532 | 4.556 | 5.193 | 4.725 | 4.323 | 5.332  | 4.385 | 4.511 | 5.161  | 4.854  | 4.862 |
| Met026 | Li+_N(CH3)H2 | 6.495 | 6.554 | 6.915 | 7.026 | 6.091 | 7.340  | 6.334 | 6.507 | 7.275  | 6.556  | 6.614 |
| Met027 | Li+_N(CH3)2H | 6.724 | 6.792 | 7.181 | 7.138 | 6.166 | 7.847  | 6.516 | 6.677 | 7.665  | 6.795  | 6.852 |
| Met028 | Li+_N(CH3)3  | 6.751 | 6.818 | 7.192 | 6.897 | 6.028 | 8.195  | 6.478 | 6.730 | 7.805  | 6.809  | 6.895 |
| Met029 | C5H5N-Li+    | 8.508 | 8.557 | 9.311 | 9.562 | 8.002 | 9.562  | 8.482 | 8.482 | 9.630  | 6.822  | 8.455 |
| Met030 | HCN-Li+      | 4.898 | 4.909 | 6.428 | 6.370 | 4.675 | 5.439  | 4.945 | 4.891 | 5.476  | 0.512  | 4.780 |
| Met031 | CH3CN-Li+    | 6.849 | 6.887 | 7.623 | 7.821 | 6.453 | 7.769  | 6.743 | 6.865 | 8.029  | 1.711  | 6.665 |
| Met032 | Li(H2O)+     | 3.995 | 3.987 | 4.344 | 4.443 | 3.850 | 4.204  | 3.847 | 3.969 | 4.178  | 3.267  | 4.013 |
| Met033 | Li+_CH3OH    | 6.085 | 6.147 | 5.942 | 6.904 | 5.644 | 6.546  | 5.912 | 6.091 | 6.204  | 4.788  | 5.929 |
| Met037 | Li+_O(CH3)2  | 6.373 | 6.462 | 5.985 | 7.094 | 5.722 | 7.228  | 6.129 | 6.357 | 6.489  | 4.758  | 6.165 |
| Met038 | Li+CH2Cl2    | 4.516 | 4.673 | 4.895 | 6.646 | 3.804 | 6.532  | 4.148 | 4.657 | 6.621  | 5.189  | 4.489 |
| Met036 | Li+S(CH3)2   | 7.767 | 7.886 | 8.437 | 8.814 | 7.197 | 10.043 | 7.478 | 7.687 | 10.395 | 10.027 | 8.275 |
| Met037 | Li+CH3F      | 6.194 | 6.259 | 5.930 | 7.140 | 5.682 | 6.855  | 6.090 | 6.209 | 5.935  | 4.439  | 5.872 |
| Met038 | BeClF        | 0.273 | 0.296 | 0.106 | 3.322 | 0.342 | 0.472  | 0.342 | 0.174 | 0.720  | 1.538  | 0.138 |
| Met039 | BeBrF        | 0.386 | 0.367 | 0.123 | 3.670 | 0.519 | 0.458  | 0.584 | 0.266 | 0.793  | 1.947  | 0.051 |
| Met040 | BeBrCl       | 0.122 | 0.064 | 0.320 | 0.334 | 0.183 | 0.028  | 0.240 | 0.039 | 0.030  | 0.411  | 0.078 |
| Met041 | Be=CH2       | 3.349 | 2.909 | 0.238 | 1.119 | 2.193 | 4.703  | 2.927 | 2.897 | 7.695  | 8.778  | 3.353 |
| Met042 | BeFCH3       | 1.303 | 1.293 | 1.409 | 0.858 | 0.833 | 0.594  | 1.386 | 1.320 | 1.120  | 0.655  | 0.741 |
| Met043 | BeClCH3      | 1.109 | 1.052 | 2.066 | 2.507 | 0.527 | 0.874  | 1.069 | 1.160 | 1.822  | 0.855  | 0.885 |
| Met044 | BeBrCH3      | 1.048 | 1.046 | 1.755 | 2.830 | 0.393 | 0.844  | 0.872 | 1.195 | 1.860  | 1.312  | 0.847 |
| Met045 | BeCl+        | 8.065 | 7.851 | 4.678 | 2.022 | 6.140 | 10.438 | 7.436 | 7.962 | 11.840 | 12.768 | 7.899 |
| Met046 | BeS          | 5.466 | 5.122 | 1.275 | 1.084 | 3.232 | 7.210  | 4.827 | 5.392 | 10.602 | 12.116 | 5.627 |
| Met047 | Be=NH        | 4.386 | 3.871 | 0.320 | 0.758 | 2.287 | 5.457  | 3.640 | 3.704 | 8.609  | 8.341  | 3.994 |
| Met048 | Be=NF        | 5.529 | 5.217 | 1.247 | 0.961 | 3.311 | 6.401  | 5.434 | 4.872 | 11.272 | 11.985 | 5.319 |
| Met049 | CH3BeH       | 0.551 | 0.595 | 0.506 | 0.492 | 0.100 | 0.108  | 0.461 | 0.550 | 0.924  | 1.398  | 0.284 |
| Met050 | BeH(CH=CH2)  | 0.747 | 0.777 | 0.517 | 0.389 | 0.048 | 0.475  | 0.375 | 0.727 | 1.154  | 1.494  | 0.082 |
| Met051 | BeH(OH)      | 1.688 | 1.816 | 1.248 | 1.419 | 0.755 | 1.454  | 0.273 | 1.772 | 0.334  | 2.453  | 1.009 |
| Met052 | BeCN(OH)     | 4.644 | 4.750 | 2.615 | 2.164 | 3.291 | 3.918  | 4.176 | 4.718 | 4.732  | 11.201 | 4.588 |
| Met053 | BeH(NO2)     | 2.794 | 2.782 | 3.221 | 1.408 | 2.709 | 3.134  | 3.941 | 2.883 | 4.599  | 4.529  | 3.181 |
| Met054 | BeHF         | 0.679 | 0.680 | 0.762 | 0.185 | 0.847 | 0.748  | 1.771 | 0.691 | 1.938  | 0.654  | 0.958 |
| Met055 | CH3BeF       | 1.256 | 1.265 | 1.365 | 0.813 | 0.828 | 0.564  | 1.385 | 1.292 | 1.070  | 0.670  | 0.735 |
| Met056 | BeHCl        | 0.436 | 0.350 | 0.556 | 3.043 | 0.508 | 0.873  | 1.409 | 0.503 | 2.696  | 2.159  | 1.042 |
| Met057 | BeH(SH)      | 0.685 | 0.744 | 0.912 | 2.963 | 0.401 | 1.173  | 1.313 | 0.924 | 2.699  | 2.271  | 1.444 |
| Met058 | Be(OH)(SH)   | 1.794 | 1.889 | 2.142 | 1.771 | 0.897 | 2.643  | 1.654 | 2.026 | 2.964  | 4.362  | 2.140 |
| Met059 | NaF          | 8.156 | 7.844 | 6.877 | 4.888 | 5.786 | 8.700  | 7.247 | 7.831 | 8.724  | 8.404  | 6.546 |

|        |               |       |       |        |       |       |        |       |       |        |        |       |
|--------|---------------|-------|-------|--------|-------|-------|--------|-------|-------|--------|--------|-------|
| Met060 | NaS           | 8.608 | 8.092 | 6.856  | 2.477 | 5.959 | 9.676  | 7.227 | 8.122 | 9.897  | 9.869  | 8.409 |
| Met061 | NaCl          | 9.001 | 8.622 | 7.371  | 2.945 | 6.588 | 10.205 | 7.847 | 8.690 | 10.357 | 10.064 | 8.253 |
| Met062 | NaBr          | 9.118 | 8.808 | 7.989  | 2.888 | 6.727 | 10.579 | 7.824 | 9.026 | 10.948 | 10.608 | 8.736 |
| Met063 | NaI           | 9.236 | 8.922 | 7.964  | 2.762 | 7.062 | 11.018 | 7.948 | 9.212 | 11.573 | 11.322 | 9.288 |
| Met064 | NaOH          | 6.633 | 6.169 | 5.492  | 3.620 | 5.108 | 7.702  | 6.279 | 6.111 | 6.922  | 6.125  | 5.966 |
| Met065 | NaSH          | 8.524 | 7.998 | 6.663  | 2.819 | 6.070 | 9.833  | 7.349 | 8.065 | 9.890  | 9.910  | 8.590 |
| Met066 | NaCH3         | 6.346 | 5.619 | 6.583  | 4.077 | 4.948 | 7.372  | 5.496 | 5.564 | 6.695  | 8.146  | 6.844 |
| Met067 | NaC2H         | 7.799 | 7.549 | 11.872 | 5.709 | 6.717 | 8.884  | 7.406 | 7.434 | 10.030 | 11.099 | 8.247 |
| Met068 | NaC2H2F       | 6.983 | 6.659 | 8.907  | 4.158 | 5.988 | 8.784  | 7.385 | 6.453 | 9.204  | 9.052  | 7.103 |
| Met069 | NaC2H6N       | 7.836 | 7.511 | 6.851  | 5.292 | 6.562 | 8.373  | 7.738 | 7.322 | 8.084  | 7.468  | 7.688 |
| Met070 | (CH3)HNNa     | 6.765 | 6.604 | 6.119  | 4.683 | 5.822 | 7.750  | 7.059 | 6.575 | 7.536  | 7.155  | 7.051 |
| Met071 | (CH3)2NNa     | 7.530 | 7.423 | 6.760  | 5.193 | 6.470 | 8.305  | 7.706 | 7.238 | 8.055  | 7.429  | 7.632 |
| Met072 | CH3-ONa       | 7.566 | 7.419 | 6.327  | 5.604 | 6.368 | 8.208  | 7.656 | 7.271 | 7.271  | 5.965  | 6.883 |
| Met073 | Na(OH)        | 6.425 | 6.148 | 5.465  | 3.576 | 5.082 | 7.675  | 6.278 | 6.083 | 6.889  | 6.105  | 5.947 |
| Met074 | NaS           | 8.160 | 8.061 | 6.844  | 2.421 | 5.923 | 9.645  | 7.220 | 8.089 | 9.865  | 9.823  | 8.379 |
| Met075 | Na+CH3        | 4.182 | 4.267 | 4.028  | 2.813 | 3.531 | 5.416  | 3.844 | 4.250 | 5.237  | 5.117  | 4.497 |
| Met076 | Na+C2H5       | 6.204 | 6.287 | 6.068  | 4.791 | 5.610 | 7.532  | 5.968 | 6.131 | 7.447  | 7.158  | 6.719 |
| Met077 | Na+C2H3       | 5.156 | 5.217 | 4.875  | 3.600 | 4.409 | 6.650  | 4.917 | 5.213 | 6.696  | 6.307  | 5.551 |
| Met078 | Na+propyne    | 6.386 | 6.457 | 6.073  | 4.859 | 5.498 | 7.923  | 6.181 | 6.322 | 8.061  | 7.433  | 6.747 |
| Met079 | Na(NH3)+      | 2.666 | 2.676 | 3.083  | 1.573 | 2.443 | 3.447  | 2.731 | 2.619 | 3.168  | 2.784  | 3.118 |
| Met080 | Na+N(CH3)H2   | 5.111 | 5.153 | 5.122  | 4.376 | 4.756 | 5.965  | 5.235 | 5.091 | 5.752  | 4.981  | 5.418 |
| Met081 | Na+N(CH3)2H   | 6.061 | 6.114 | 5.968  | 5.049 | 5.587 | 7.186  | 6.198 | 6.003 | 6.842  | 5.908  | 6.408 |
| Met082 | Na+N(CH3)3    | 6.626 | 6.682 | 6.380  | 5.176 | 6.011 | 8.054  | 6.741 | 6.549 | 7.494  | 6.432  | 7.003 |
| Met083 | C5H5N-Na+     | 8.268 | 8.287 | 8.716  | 7.929 | 7.851 | 9.309  | 8.588 | 8.204 | 9.227  | 6.408  | 8.448 |
| Met084 | HCN-Na+       | 3.083 | 3.083 | 5.220  | 3.197 | 2.928 | 3.644  | 3.419 | 3.055 | 3.619  | 1.386  | 3.117 |
| Met085 | CH3CN-Na+     | 5.226 | 5.248 | 6.540  | 4.846 | 4.892 | 6.148  | 5.435 | 5.216 | 6.314  | 0.035  | 5.205 |
| Met086 | Na(H2O)+      | 2.415 | 2.370 | 2.650  | 1.626 | 2.259 | 2.613  | 2.482 | 2.360 | 2.423  | 1.511  | 2.485 |
| Met087 | Na+CH3OH      | 4.932 | 4.960 | 4.675  | 4.480 | 4.539 | 5.356  | 5.038 | 4.922 | 4.821  | 3.443  | 4.855 |
| Met088 | Na+O(CH3)2    | 5.963 | 6.012 | 5.455  | 5.216 | 5.375 | 6.761  | 6.041 | 5.900 | 5.790  | 4.109  | 5.829 |
| Met089 | Na+OC(CH3)2   | 6.569 | 6.597 | 6.628  | 6.131 | 6.143 | 7.411  | 6.877 | 6.596 | 6.216  | 2.775  | 6.124 |
| Met090 | Na+HCON(CH3)2 | 7.275 | 7.296 | 6.768  | 6.579 | 6.775 | 8.068  | 7.609 | 7.218 | 7.215  | 5.644  | 6.905 |
| Met091 | Na+CH2Cl2     | 5.470 | 5.527 | 4.283  | 4.123 | 4.665 | 7.142  | 5.263 | 5.439 | 7.274  | 5.795  | 5.476 |
| Met092 | Na+S(CH3)2    | 7.382 | 7.456 | 6.628  | 6.229 | 6.856 | 9.342  | 7.321 | 7.262 | 9.767  | 9.277  | 8.049 |
| Met093 | MgClF         | 0.075 | 0.122 | 0.274  | 3.014 | 0.123 | 0.958  | 0.302 | 0.137 | 1.090  | 1.378  | 0.126 |
| Met094 | MgBrF         | 0.201 | 0.284 | 0.004  | 3.462 | 0.289 | 1.098  | 0.640 | 0.143 | 1.344  | 1.743  | 0.040 |
| Met095 | MgBrCl        | 0.156 | 0.158 | 0.320  | 0.424 | 0.165 | 0.144  | 0.335 | 0.054 | 0.235  | 0.363  | 0.090 |
| Met096 | Mg=CH2        | 3.405 | 3.253 | 3.679  | 3.349 | 3.309 | 5.728  | 3.752 | 4.075 | 7.618  | 7.824  | 3.338 |
| Met097 | MgFCH3        | 1.923 | 2.026 | 2.123  | 1.266 | 1.280 | 1.015  | 2.009 | 2.051 | 1.588  | 0.286  | 1.207 |
| Met098 | MgClCH3       | 2.114 | 2.127 | 2.169  | 1.660 | 1.365 | 1.958  | 1.906 | 2.292 | 2.847  | 1.800  | 1.524 |
| Met099 | MgBrCH3       | 2.077 | 2.094 | 2.668  | 2.033 | 1.298 | 2.138  | 1.672 | 2.377 | 3.141  | 2.245  | 1.548 |
| Met100 | CH3MgH        | 0.422 | 0.434 | 1.887  | 0.716 | 0.776 | 0.350  | 1.049 | 0.317 | 0.707  | 1.531  | 0.438 |

|        |             |       |       |       |       |       |       |       |       |       |        |       |
|--------|-------------|-------|-------|-------|-------|-------|-------|-------|-------|-------|--------|-------|
| Met101 | MgH(CH=CH2) | 0.375 | 0.393 | 1.708 | 1.069 | 1.043 | 0.282 | 1.359 | 0.325 | 1.481 | 2.120  | 0.568 |
| Met102 | MgH(CN)     | 3.558 | 3.512 | 3.528 | 2.090 | 3.667 | 3.159 | 5.044 | 3.573 | 5.039 | 9.587  | 4.312 |
| Met103 | MgH(NH2)    | 0.649 | 0.784 | 1.704 | 0.122 | 0.473 | 0.605 | 1.119 | 0.801 | 0.269 | 0.303  | 0.361 |
| Met104 | MgH(OH)     | 0.508 | 0.632 | 1.888 | 0.138 | 0.622 | 0.376 | 1.231 | 0.572 | 0.104 | 1.091  | 0.183 |
| Met105 | MgCN(OH)    | 4.015 | 4.084 | 1.899 | 1.889 | 3.006 | 3.345 | 3.758 | 4.047 | 4.819 | 10.586 | 4.455 |
| Met106 | MgH(ONO)    | 0.730 | 0.749 | 2.236 | 0.873 | 0.606 | 0.428 | 2.802 | 0.584 | 0.320 | 0.380  | 0.231 |
| Met107 | MgH(NO2)    | 3.796 | 3.733 | 6.033 | 2.960 | 4.268 | 4.212 | 5.621 | 3.941 | 5.154 | 5.954  | 4.281 |
| Met108 | MgHF        | 1.501 | 1.512 | 3.856 | 1.737 | 1.917 | 1.310 | 2.931 | 1.535 | 2.221 | 1.702  | 1.544 |
| Met109 | MgHCl       | 1.615 | 1.574 | 3.831 | 1.037 | 1.957 | 2.186 | 2.785 | 1.860 | 3.407 | 3.188  | 1.804 |
| Met110 | Mg(OH)(SH)  | 1.550 | 1.635 | 1.366 | 1.752 | 0.669 | 2.631 | 1.158 | 1.887 | 3.074 | 4.012  | 1.989 |
| Met111 | AlH=NH      | 2.787 | 2.689 | 1.902 | 0.684 | 2.082 | 3.951 | 2.479 | 3.327 | 5.070 | 5.345  | 2.607 |
| Met112 | AlH2NH2     | 1.079 | 1.286 | 0.576 | 2.115 | 0.566 | 0.681 | 0.739 | 1.176 | 0.248 | 0.487  | 0.511 |
| Met113 | AlH2OH      | 1.233 | 1.297 | 1.160 | 1.717 | 0.628 | 1.902 | 1.282 | 1.242 | 2.382 | 2.349  | 1.010 |
| Met114 | AlH=PH      | 2.949 | 2.792 | 1.587 | 1.435 | 2.052 | 4.183 | 2.705 | 3.423 | 4.321 | 6.515  | 2.884 |
| Met115 | AlH2SH      | 0.947 | 0.936 | 1.277 | 3.482 | 0.443 | 1.443 | 0.952 | 1.112 | 2.215 | 2.802  | 1.110 |
| Met116 | AlH=S       | 3.938 | 3.787 | 2.503 | 1.939 | 2.885 | 5.385 | 3.161 | 4.424 | 5.790 | 7.771  | 3.416 |
| Met117 | AlF         | 1.530 | 1.481 | 2.690 | 0.607 | 2.571 | 4.051 | 2.451 | 2.508 | 6.726 | 7.333  | 2.304 |
| Met118 | AlCl        | 1.622 | 1.521 | 2.775 | 2.030 | 2.567 | 3.951 | 2.193 | 2.746 | 7.122 | 8.656  | 2.331 |
| Met119 | AlBr        | 1.746 | 1.702 | 3.013 | 1.737 | 2.566 | 3.920 | 1.973 | 2.929 | 7.110 | 8.946  | 2.289 |
| Met120 | AlS         | 3.857 | 3.754 | 2.904 | 1.183 | 3.382 | 6.252 | 3.100 | 4.916 | 8.763 | 11.361 | 3.495 |
| Met121 | AlF2        | 1.925 | 1.887 | 2.585 | 0.270 | 2.344 | 4.769 | 2.222 | 2.882 | 6.141 | 7.023  | 2.125 |
| Met122 | AlF2O       | 0.164 | 0.159 | 0.172 | 0.091 | 0.273 | 0.142 | 0.052 | 0.160 | 0.140 | 0.278  | 0.354 |
| Met123 | AlCl+       | 5.610 | 5.624 | 4.756 | 0.437 | 5.174 | 7.940 | 4.717 | 6.182 | 9.992 | 11.660 | 5.078 |
| Met124 | AlCl2       | 1.588 | 1.528 | 2.269 | 2.705 | 2.036 | 4.421 | 1.644 | 2.544 | 5.705 | 8.177  | 1.818 |
| Met125 | AlCl2-      | 0.795 | 0.849 | 2.113 | 3.935 | 1.140 | 2.418 | 0.802 | 1.079 | 5.412 | 7.845  | 0.699 |
| Met126 | AlClF+      | 0.210 | 0.244 | 0.145 | 2.586 | 0.329 | 1.585 | 0.032 | 0.602 | 0.988 | 2.554  | 0.387 |
| Met127 | AlClF       | 1.772 | 1.724 | 2.453 | 2.886 | 2.215 | 4.719 | 2.011 | 2.807 | 6.054 | 7.700  | 1.995 |
| Met128 | AlF2Cl      | 0.504 | 0.506 | 0.461 | 3.426 | 0.672 | 0.265 | 0.981 | 0.357 | 0.372 | 0.949  | 0.613 |
| Met129 | AlFCl2      | 0.485 | 0.486 | 0.472 | 3.297 | 0.634 | 0.121 | 0.928 | 0.343 | 0.653 | 0.853  | 0.581 |

DEN. reference data

| Mul.      | Low. | Hir. | I-H | CM5 | ESP | NPA | AIM   | ACP    |        |       |        |       |       |       |       |
|-----------|------|------|-----|-----|-----|-----|-------|--------|--------|-------|--------|-------|-------|-------|-------|
| Deviation |      |      |     |     |     |     | 0.030 | -0.726 | -0.625 | 1.030 | -0.038 | 0.076 | 1.440 | 1.364 | 0.040 |
| Abs. dev. |      |      |     |     |     |     | 0.843 | 1.519  | 0.756  | 1.161 | 0.435  | 0.178 | 1.538 | 2.069 | 0.334 |
| Disp.     |      |      |     |     |     |     | 1.196 | 2.107  | 0.935  | 1.391 | 0.595  | 0.316 | 2.083 | 2.873 | 0.426 |
| xDisp.    |      |      |     |     |     |     | 1.319 | 2.544  | 1.000  | 1.472 | 0.737  | 0.396 | 2.189 | 3.044 | 0.547 |

Exp. reference data

| Den.      | Mul. | Low. | Hir. | I-H | CM5 | ESP    | NPA    | AIM    | ACP    |       |        |       |       |       |        |
|-----------|------|------|------|-----|-----|--------|--------|--------|--------|-------|--------|-------|-------|-------|--------|
| Deviation |      |      |      |     |     | -0.063 | -0.033 | -0.789 | -0.688 | 0.967 | -0.101 | 0.014 | 1.378 | 1.302 | -0.022 |
| Abs. dev. |      |      |      |     |     | 0.121  | 0.884  | 1.591  | 0.814  | 1.085 | 0.467  | 0.219 | 1.465 | 2.020 | 0.329  |
| Disp.     |      |      |      |     |     | 0.179  | 1.253  | 2.219  | 1.039  | 1.310 | 0.637  | 0.341 | 2.003 | 2.809 | 0.424  |

Number of molecules 129
