# Supplementary material for: A simple model for calculating atomic charges in molecules
Source: Royal Society of Chemistry journal article supplement (doi:10.1039/c8cp03764g), 2018-01-01
Supplement: c8cp03764g4.pdf [file c8cp03764g4.pdf]

Table S1. Atomic charges on atoms in Chlorophyll C2 and Na+ quadruplex G4 caclulated with selected populational schemes.

File G4Na.out

Molecule Na+ Quadruplex G4

OPT G4 Na complex B3LYP/Def2TZVP VAC.

1 65

| Dipole             | 0.0117  | -0.0189 | 0.0000    | 0.0222  |         |         |          |         |         |         |         |         |
|--------------------|---------|---------|-----------|---------|---------|---------|----------|---------|---------|---------|---------|---------|
| Quadrupole         | 51.8905 | 51.0612 | -102.9516 | 0.4223  | -0.0000 | -0.0000 |          |         |         |         |         |         |
| Atomic coordinates |         |         |           | Mul.    | Lowdin  | Hirsch. | I-Hirsch | CM5     | ESP     | NPA     | AIM     | ACP     |
| 7                  | -3.5341 | -0.7683 | -0.0000   | -0.2368 | 0.2287  | -0.0567 | -0.7189  | -0.3887 | -0.6445 | -0.5806 | -1.1675 | -0.3873 |
| 6                  | -4.7774 | -1.3537 | -0.0000   | 0.3425  | -0.3799 | 0.1681  | 0.8905   | 0.3785  | 0.8516  | 0.5915  | 1.4851  | 0.4803  |
| 7                  | -4.8325 | -2.6904 | -0.0000   | -0.4024 | 0.0358  | -0.1360 | -0.9009  | -0.5797 | -0.8901 | -0.7623 | -1.1894 | -0.4987 |
| 7                  | -5.9033 | -0.6673 | -0.0000   | -0.2884 | 0.1195  | -0.2203 | -0.6616  | -0.3905 | -0.7690 | -0.5247 | -1.1236 | -0.4477 |
| 6                  | -5.7011 | 0.6556  | 0.0000    | 0.1802  | -0.2601 | 0.0815  | 0.5088   | 0.2339  | 0.6097  | 0.3425  | 0.9160  | 0.3012  |
| 6                  | -4.5043 | 1.3490  | 0.0000    | 0.0553  | -0.2178 | -0.0343 | -0.2099  | 0.0547  | -0.1187 | -0.1040 | 0.3716  | 0.0889  |
| 6                  | -3.2961 | 0.6062  | 0.0000    | 0.3751  | -0.3567 | 0.1648  | 0.7738   | 0.2604  | 0.5893  | 0.6293  | 1.3069  | 0.3951  |
| 8                  | -2.1411 | 1.0398  | 0.0000    | -0.6241 | 0.0848  | -0.2638 | -0.7290  | -0.3900 | -0.6584 | -0.7354 | -1.2432 | -0.3951 |
| 7                  | -4.7244 | 2.7117  | 0.0000    | -0.3672 | 0.1152  | -0.1448 | -0.3315  | -0.3408 | -0.3632 | -0.4682 | -1.1110 | -0.3875 |
| 6                  | -6.0157 | 2.8382  | 0.0000    | 0.0840  | -0.2615 | 0.0704  | 0.2737   | 0.1696  | 0.1014  | 0.2057  | 0.9749  | 0.2102  |
| 7                  | -6.6619 | 1.6252  | 0.0000    | -0.2361 | 0.2226  | -0.0377 | -0.5114  | -0.3843 | -0.4215 | -0.5033 | -1.1765 | -0.3583 |
| 1                  | -2.6926 | -1.3651 | -0.0000   | 0.2740  | 0.2106  | 0.1066  | 0.3704   | 0.3190  | 0.4272  | 0.4507  | 0.4967  | 0.1948  |
| 1                  | -6.5524 | 3.7733  | 0.0000    | 0.1612  | 0.1363  | 0.0707  | 0.1090   | 0.1435  | 0.1573  | 0.2064  | 0.1011  | 0.1316  |
| 1                  | -7.6519 | 1.4588  | 0.0000    | 0.2386  | 0.1976  | 0.1630  | 0.3803   | 0.3604  | 0.3729  | 0.4272  | 0.4534  | 0.2877  |
| 1                  | -4.0218 | -3.3186 | -0.0000   | 0.2750  | 0.1627  | 0.0861  | 0.3508   | 0.2927  | 0.3258  | 0.4357  | 0.5002  | 0.2277  |
| 1                  | -5.7538 | -3.0903 | -0.0000   | 0.2431  | 0.1797  | 0.1354  | 0.3976   | 0.3335  | 0.4298  | 0.4044  | 0.4285  | 0.2665  |
| 7                  | 0.7614  | -3.5245 | -0.0000   | -0.2364 | 0.2302  | -0.0562 | -0.7195  | -0.3892 | -0.7894 | -0.5800 | -1.1675 | -0.3873 |
| 6                  | 1.3458  | -4.7648 | -0.0000   | 0.3425  | -0.3815 | 0.1681  | 0.8914   | 0.3790  | 0.9735  | 0.5917  | 1.4853  | 0.4803  |
| 7                  | 2.6827  | -4.8178 | -0.0000   | -0.4027 | 0.0365  | -0.1357 | -0.9014  | -0.5801 | -0.9353 | -0.7622 | -1.1894 | -0.4987 |
| 7                  | 0.6579  | -5.8895 | -0.0000   | -0.2885 | 0.1200  | -0.2207 | -0.6628  | -0.3910 | -0.7985 | -0.5252 | -1.1235 | -0.4477 |
| 6                  | -0.6650 | -5.6899 | -0.0000   | 0.1812  | -0.2601 | 0.0816  | 0.5097   | 0.2340  | 0.5970  | 0.3423  | 0.9160  | 0.3012  |
| 6                  | -1.3572 | -4.4965 | -0.0000   | 0.0548  | -0.2169 | -0.0342 | -0.2097  | 0.0548  | -0.2036 | -0.1041 | 0.3714  | 0.0889  |
| 6                  | -0.6129 | -3.2890 | -0.0000   | 0.3750  | -0.3585 | 0.1654  | 0.7749   | 0.2612  | 0.6686  | 0.6298  | 1.3057  | 0.3951  |
| 8                  | -1.0457 | -2.1366 | -0.0000   | -0.6213 | 0.0889  | -0.2625 | -0.7282  | -0.3893 | -0.6320 | -0.7333 | -1.2432 | -0.3952 |
| 7                  | -2.7205 | -4.7189 | -0.0000   | 0.3681  | 0.1154  | -0.1449 | -0.3326  | -0.3415 | -0.2587 | -0.4691 | -1.1109 | -0.3875 |
| 6                  | -2.8486 | -6.0079 | -0.0000   | 0.0852  | -0.2630 | 0.0710  | 0.2749   | 0.1710  | 0.0107  | 0.2064  | 0.9749  | 0.2102  |
| 7                  | -1.6360 | -6.6506 | -0.0000   | -0.2354 | 0.2235  | -0.0377 | -0.5125  | -0.3861 | -0.3502 | -0.5027 | -1.1765 | -0.3583 |
| 1                  | 1.3589  | -2.6842 | -0.0000   | 0.2744  | 0.2109  | 0.1069  | 0.3708   | 0.3195  | 0.5010  | 0.4506  | 0.4967  | 0.1948  |
| 1                  | -3.7849 | -6.5453 | -0.0000   | 0.1616  | 0.1370  | 0.0713  | 0.1097   | 0.1439  | 0.1754  | 0.2068  | 0.1011  | 0.1316  |
| 1                  | -1.4716 | -7.6376 | -0.0000   | 0.2366  | 0.1958  | 0.1620  | 0.3798   | 0.3611  | 0.3558  | 0.4261  | 0.4534  | 0.2877  |
| 1                  | 3.3127  | -4.0093 | -0.0000   | 0.2749  | 0.1627  | 0.0867  | 0.3519   | 0.2932  | 0.3469  | 0.4360  | 0.5002  | 0.2277  |
| 1                  | 3.0821  | -5.7385 | -0.0000   | 0.2428  | 0.1795  | 0.1351  | 0.3974   | 0.3336  | 0.4297  | 0.4041  | 0.4285  | 0.2665  |
| 7                  | 3.5342  | 0.7682  | 0.0000    | -0.2367 | 0.2288  | -0.0567 | -0.7189  | -0.3887 | -0.7282 | -0.5805 | -1.1675 | -0.3873 |
| 6                  | 4.7777  | 1.3536  | 0.0000    | 0.3424  | -0.3799 | 0.1681  | 0.8905   | 0.3785  | 0.9025  | 0.5915  | 1.4851  | 0.4803  |
| 7                  | 4.8329  | 2.6902  | 0.0000    | -0.4024 | 0.0359  | -0.1359 | -0.9008  | -0.5795 | -0.9309 | -0.7623 | -1.1894 | -0.4987 |
| 7                  | 5.9034  | 0.6673  | 0.0000    | -0.2883 | 0.1196  | -0.2203 | -0.6616  | -0.3905 | -0.7922 | -0.5246 | -1.1236 | -0.4477 |
| 6                  | 5.7012  | -0.6555 | -0.0000   | 0.1802  | -0.2601 | 0.0815  | 0.5088   | 0.2339  | 0.6560  | 0.3424  | 0.9160  | 0.3012  |
| 6                  | 4.5042  | -1.3489 | -0.0000   | 0.0553  | -0.2178 | -0.0343 | -0.2098  | 0.0547  | -0.1613 | -0.1040 | 0.3716  | 0.0889  |
| 6                  | 3.2960  | -0.6061 | -0.0000   | 0.3751  | -0.3566 | 0.1648  | 0.7737   | 0.2604  | 0.6219  | 0.6293  | 1.3069  | 0.3951  |
| 8                  | 2.1409  | -1.0399 | -0.0000   | -0.6242 | 0.0846  | -0.2638 | -0.7291  | -0.3901 | -0.6556 | -0.7354 | -1.2432 | -0.3951 |
| 7                  | 4.7244  | -2.7115 | -0.0000   | -0.3673 | 0.1152  | -0.1448 | -0.3317  | -0.3409 | -0.3217 | -0.4682 | -1.1110 | -0.3875 |
| 6                  | 6.0157  | -2.8380 | -0.0000   | 0.0840  | -0.2615 | 0.0704  | 0.2737   | 0.1695  | 0.0884  | 0.2056  | 0.9749  | 0.2102  |
| 7                  | 6.6619  | -1.6251 | -0.0000   | -0.2360 | 0.2227  | -0.0376 | -0.5113  | -0.3843 | -0.4472 | -0.5033 | -1.1765 | -0.3583 |
| 1                  | 2.6931  | 1.3650  | 0.0000    | 0.2739  | 0.2106  | 0.1066  | 0.3704   | 0.3191  | 0.4869  | 0.4506  | 0.4967  | 0.1948  |
| 1                  | 6.5523  | -3.7730 | -0.0000   | 0.1612  | 0.1363  | 0.0707  | 0.1089   | 0.1435  | 0.1605  | 0.2064  | 0.1011  | 0.1316  |
| 1                  | 7.6519  | -1.4585 | -0.0000   | 0.2386  | 0.1976  | 0.1630  | 0.3804   | 0.3604  | 0.3812  | 0.4273  | 0.4533  | 0.2877  |
| 1                  | 4.0222  | 3.3185  | 0.0000    | 0.2750  | 0.1628  | 0.0862  | 0.3509   | 0.2927  | 0.3433  | 0.4358  | 0.5002  | 0.2277  |
| 1                  | 5.7544  | 3.0902  | 0.0000    | 0.2432  | 0.1799  | 0.1354  | 0.3976   | 0.3335  | 0.4379  | 0.4044  | 0.4285  | 0.2665  |
| 7                  | -0.7609 | 3.5244  | 0.0000    | -0.2365 | 0.2305  | -0.0562 | -0.7197  | -0.3894 | -0.8639 | -0.5800 | -1.1675 | -0.3873 |
| 6                  | -1.3459 | 4.7636  | 0.0000    | 0.3423  | -0.3822 | 0.1681  | 0.8917   | 0.3792  | 1.0230  | 0.5917  | 1.4853  | 0.4803  |
| 7                  | -2.6827 | 4.8161  | 0.0000    | -0.4026 | 0.0367  | -0.1358 | -0.9018  | -0.5807 | -0.9905 | -0.7621 | -1.1894 | -0.4987 |
| 7                  | -0.6584 | 5.8880  | 0.0000    | -0.2884 | 0.1202  | -0.2208 | -0.6631  | -0.3912 | -0.8192 | -0.5254 | -1.1235 | -0.4477 |
| 6                  | 0.6645  | 5.6894  | 0.0000    | 0.1814  | -0.2602 | 0.0816  | 0.5100   | 0.2340  | 0.6359  | 0.3423  | 0.9160  | 0.3012  |
| 6                  | 1.3573  | 4.4971  | 0.0000    | 0.0547  | -0.2170 | -0.0342 | -0.2099  | 0.0548  | -0.2276 | -0.1043 | 0.3714  | 0.0889  |
| 6                  | 0.6135  | 3.2900  | 0.0000    | 0.3746  | -0.3596 | 0.1654  | 0.7752   | 0.2613  | 0.7195  | 0.6299  | 1.3057  | 0.3951  |
| 8                  | 1.0465  | 2.1387  | 0.0000    | -0.6202 | 0.0900  | -0.2623 | -0.7278  | -0.3888 | -0.6703 | -0.7328 | -1.2432 | -0.3951 |
| 7                  | 2.7205  | 4.7203  | 0.0000    | -0.3680 | 0.1157  | -0.1450 | -0.3329  | -0.3418 | -0.2693 | -0.4690 | -1.1109 | -0.3875 |
| 6                  | 2.8480  | 6.0086  | 0.0000    | 0.0852  | -0.2634 | 0.0710  | 0.2752   | 0.1712  | 0.0385  | 0.2065  | 0.9749  | 0.2102  |

|    |         |        |        |         |        |         |         |         |         |         |         |         |
|----|---------|--------|--------|---------|--------|---------|---------|---------|---------|---------|---------|---------|
| 7  | 1.6351  | 6.6501 | 0.0000 | -0.2352 | 0.2239 | -0.0377 | -0.5127 | -0.3866 | -0.3957 | -0.5026 | -1.1765 | -0.3583 |
| 1  | -1.3581 | 2.6839 | 0.0000 | 0.2744  | 0.2109 | 0.1069  | 0.3708  | 0.3196  | 0.5399  | 0.4505  | 0.4967  | 0.1948  |
| 1  | 3.7840  | 6.5461 | 0.0000 | 0.1616  | 0.1370 | 0.0713  | 0.1097  | 0.1439  | 0.1704  | 0.2068  | 0.1011  | 0.1316  |
| 1  | 1.4702  | 7.6362 | 0.0000 | 0.2361  | 0.1955 | 0.1618  | 0.3797  | 0.3612  | 0.3688  | 0.4259  | 0.4534  | 0.2877  |
| 1  | -3.3127 | 4.0078 | 0.0000 | 0.2747  | 0.1626 | 0.0866  | 0.3518  | 0.2933  | 0.3883  | 0.4359  | 0.5002  | 0.2277  |
| 1  | -3.0821 | 5.7360 | 0.0000 | 0.2424  | 0.1790 | 0.1349  | 0.3974  | 0.3338  | 0.4408  | 0.4039  | 0.4285  | 0.2665  |
| 11 | 0.0000  | 0.0000 | 0.0000 | 0.6990  | 0.1246 | 0.3821  | 1.0294  | 0.7076  | 0.7792  | 0.9358  | 0.9072  | 0.5627  |

Dipole moment (in D) 0.02 (DEN) 0.03 0.04 0.02 0.02 0.02 0.06 0.02 0.01 0.00

-----  
 File Mg\_Chlorophyll\_C2.out  
 Molecule Mg\_Chlorophyll\_C2  
 OPT Mg Chlorophyll c2 B3LYP/Def2TZVP VAC.  
 0 73

| Dipole             | -9.2760  | 4.6537  | -0.9894 | 10.4250 |         |          |         |         |         |         |         |         |
|--------------------|----------|---------|---------|---------|---------|----------|---------|---------|---------|---------|---------|---------|
| Quadrupole         | -31.9324 | 25.0152 | 6.9172  | 23.4103 | -5.1827 | -10.4527 |         |         |         |         |         |         |
| Atomic coordinates |          |         | Mu1.    | Lowdin  | Hirsch. | I-Hirsch | CM5     | ESP     | NPA     | AIM     | ACP     |         |
| 6                  | 1.7665   | 0.5238  | -0.1715 | 0.3055  | -0.1218 | 0.0363   | 0.2947  | 0.1009  | 0.0296  | 0.1634  | 0.3966  | 0.1407  |
| 6                  | 0.6196   | 2.4085  | -0.1334 | 0.2308  | -0.1673 | 0.0356   | 0.3272  | 0.0983  | 0.2483  | 0.1434  | 0.4158  | 0.1503  |
| 7                  | 0.4963   | 1.0541  | -0.1409 | -0.3970 | 0.1843  | -0.1610  | -0.8673 | -0.4408 | -0.5419 | -0.6697 | -1.2379 | -0.4615 |
| 6                  | -0.4335  | 3.3320  | -0.1109 | -0.3292 | -0.0791 | -0.0500  | -0.2847 | -0.0924 | -0.3339 | -0.2210 | -0.0322 | -0.0913 |
| 1                  | -0.1433  | 4.3763  | -0.1260 | 0.1262  | 0.1576  | 0.0371   | 0.1111  | 0.0980  | 0.1747  | 0.2114  | 0.0323  | 0.0781  |
| 6                  | -1.7991  | 3.0770  | -0.0669 | 0.2700  | -0.1637 | 0.0372   | 0.3406  | 0.0987  | 0.0615  | 0.1510  | 0.4079  | 0.1512  |
| 6                  | -2.8455  | 4.0844  | -0.0463 | -0.0235 | -0.0925 | -0.0025  | 0.0681  | -0.0077 | 0.2495  | -0.0012 | -0.0236 | 0.0252  |
| 7                  | -2.3562  | 1.8320  | -0.0376 | -0.3600 | 0.1800  | -0.1669  | -0.9232 | -0.4687 | -0.3766 | -0.7028 | -1.2773 | -0.4726 |
| 6                  | -4.0351  | 3.4086  | 0.0024  | 0.0494  | -0.0821 | -0.0193  | -0.0405 | -0.0188 | -0.1484 | -0.0876 | -0.0243 | 0.0029  |
| 6                  | -3.7094  | 1.9868  | -0.0021 | 0.2507  | -0.1526 | 0.0415   | 0.3612  | 0.1039  | 0.2048  | 0.1733  | 0.4191  | 0.1568  |
| 6                  | 1.9760   | -0.8522 | -0.2702 | -0.0847 | -0.0234 | -0.0014  | 0.0107  | 0.0033  | 0.1829  | 0.0028  | -0.0167 | 0.0164  |
| 6                  | -4.6306  | 0.9460  | 0.0330  | -0.3119 | -0.0761 | -0.0491  | -0.2957 | -0.0911 | -0.2833 | -0.2218 | -0.0299 | -0.0912 |
| 1                  | -5.6766  | 1.2280  | 0.0755  | 0.1226  | 0.1577  | 0.0374   | 0.1075  | 0.0980  | 0.1551  | 0.2128  | 0.0339  | 0.0771  |
| 6                  | 0.9301   | -1.7848 | -0.2578 | 0.2419  | -0.1401 | 0.0326   | 0.3285  | 0.1030  | 0.0992  | 0.1808  | 0.4625  | 0.1445  |
| 6                  | 1.3335   | -3.1265 | -0.4677 | 0.0118  | -0.0660 | -0.0429  | -0.2842 | -0.0354 | -0.2769 | -0.1996 | -0.0602 | -0.0330 |
| 7                  | -0.3983  | -1.6939 | -0.1206 | -0.3856 | 0.1903  | -0.1624  | -0.8929 | -0.4705 | -0.4712 | -0.6870 | -1.2909 | -0.4666 |
| 6                  | 0.2021   | -3.9095 | -0.4556 | -0.0835 | -0.0744 | 0.0179   | 0.1501  | 0.0132  | 0.1650  | 0.0462  | -0.0043 | 0.0465  |
| 6                  | -0.8848  | -2.9742 | -0.2382 | 0.2798  | -0.1502 | 0.0384   | 0.3274  | 0.0993  | 0.2609  | 0.1328  | 0.3884  | 0.1502  |
| 6                  | -4.3657  | -0.4289 | 0.0213  | 0.2361  | -0.1642 | 0.0383   | 0.3414  | 0.1012  | 0.1122  | 0.1545  | 0.4159  | 0.1533  |
| 7                  | -3.1255  | -0.9830 | -0.0216 | -0.3623 | 0.1823  | -0.1632  | -0.8776 | -0.4510 | -0.5749 | -0.6814 | -1.2480 | -0.4627 |
| 6                  | -3.2848  | -2.3439 | -0.0342 | 0.2306  | -0.1472 | 0.0402   | 0.3487  | 0.1024  | 0.3905  | 0.1576  | 0.4082  | 0.1549  |
| 6                  | -2.2514  | -3.2661 | -0.1722 | -0.3226 | -0.0678 | -0.0406  | -0.2655 | -0.0821 | -0.4273 | -0.2011 | -0.0241 | -0.0832 |
| 1                  | -2.5387  | -4.3071 | -0.2619 | 0.1768  | 0.1624  | 0.0376   | 0.1111  | 0.0987  | 0.1758  | 0.2238  | 0.0516  | 0.0742  |
| 6                  | -4.7063  | -2.6619 | 0.0330  | 0.0861  | -0.0810 | -0.0181  | -0.0344 | -0.0176 | -0.1530 | -0.0837 | -0.0254 | 0.0047  |
| 6                  | -5.3742  | -1.4673 | 0.0470  | -0.0604 | -0.1017 | -0.0077  | 0.0493  | -0.0128 | 0.2105  | -0.0075 | -0.0281 | 0.0211  |
| 6                  | -5.3963  | 3.9397  | 0.0150  | -0.1640 | -0.1567 | -0.0332  | -0.0472 | -0.0899 | -0.0791 | -0.2041 | -0.0159 | -0.0730 |
| 1                  | -6.1450  | 3.3392  | -0.4986 | 0.1072  | 0.1471  | 0.0386   | 0.0918  | 0.0955  | 0.1283  | 0.2002  | 0.0225  | 0.0794  |
| 6                  | -5.7906  | 5.0739  | 0.5955  | -0.2683 | -0.1883 | -0.0750  | -0.2694 | -0.1769 | -0.3743 | -0.3594 | -0.0673 | -0.1841 |
| 1                  | -5.1110  | 5.7026  | 1.1611  | 0.1294  | 0.1239  | 0.0389   | 0.1172  | 0.0929  | 0.1728  | 0.1901  | 0.0340  | 0.0854  |
| 1                  | -6.8244  | 5.3989  | 0.5414  | 0.1173  | 0.1221  | 0.0388   | 0.1111  | 0.0912  | 0.1508  | 0.1977  | 0.0359  | 0.0879  |
| 6                  | -2.6191  | 5.5596  | -0.1123 | -0.4395 | -0.2550 | -0.0805  | -0.4102 | -0.2236 | -0.3885 | -0.6287 | 0.0178  | -0.2484 |
| 1                  | -1.7554  | 5.8031  | -0.7376 | 0.1186  | 0.1271  | 0.0355   | 0.1155  | 0.0879  | 0.0973  | 0.2140  | 0.0088  | 0.0853  |
| 1                  | -3.4930  | 6.0653  | -0.5308 | 0.1501  | 0.1351  | 0.0359   | 0.1217  | 0.0892  | 0.1184  | 0.2282  | 0.0290  | 0.0816  |
| 1                  | -2.4354  | 5.9902  | 0.8794  | 0.1396  | 0.1314  | 0.0382   | 0.1205  | 0.0896  | 0.1137  | 0.2186  | 0.0180  | 0.0873  |
| 6                  | -6.8493  | -1.2334 | 0.1140  | -0.3868 | -0.2524 | -0.0794  | -0.4024 | -0.2222 | -0.4115 | -0.6248 | 0.0178  | -0.2481 |
| 1                  | -7.1312  | -0.7184 | 1.0393  | 0.1345  | 0.1329  | 0.0396   | 0.1218  | 0.0912  | 0.1227  | 0.2209  | 0.0216  | 0.0875  |
| 1                  | -7.1967  | -0.6144 | -0.7204 | 0.1292  | 0.1300  | 0.0370   | 0.1173  | 0.0887  | 0.1045  | 0.2167  | 0.0151  | 0.0857  |
| 1                  | -7.4031  | -2.1742 | 0.0849  | 0.1165  | 0.1287  | 0.0375   | 0.1171  | 0.0903  | 0.1263  | 0.2186  | 0.0165  | 0.0874  |
| 6                  | 2.0192   | 2.7810  | -0.1482 | 0.0434  | -0.0891 | 0.0003   | 0.0770  | -0.0048 | 0.0696  | 0.0124  | -0.0259 | 0.0279  |
| 6                  | 2.7330   | 1.6103  | -0.1577 | -0.0373 | -0.0803 | -0.0203  | -0.0593 | -0.0188 | 0.0319  | -0.1073 | -0.0228 | 0.0006  |
| 6                  | 2.5391   | 4.1803  | -0.0850 | -0.4321 | -0.2528 | -0.0811  | -0.4134 | -0.2241 | -0.3214 | -0.6310 | 0.0160  | -0.2498 |
| 1                  | 2.4718   | 4.6807  | -1.0583 | 0.1379  | 0.1319  | 0.0378   | 0.1207  | 0.0892  | 0.0963  | 0.2191  | 0.0132  | 0.0853  |
| 1                  | 1.9730   | 4.7845  | 0.6301  | 0.1262  | 0.1298  | 0.0381   | 0.1203  | 0.0904  | 0.0937  | 0.2179  | 0.0139  | 0.0874  |
| 1                  | 3.5877   | 4.1930  | 0.2202  | 0.1501  | 0.1344  | 0.0348   | 0.1227  | 0.0886  | 0.1069  | 0.2280  | 0.0308  | 0.0806  |
| 6                  | 4.1709   | 1.4696  | 0.0288  | -0.2488 | -0.0597 | 0.0000   | 0.0390  | -0.0519 | 0.0883  | -0.1065 | -0.0112 | -0.0476 |
| 1                  | 4.4905   | 0.7870  | 0.8095  | 0.1657  | 0.1731  | 0.0406   | 0.1047  | 0.1122  | 0.0861  | 0.2336  | 0.1253  | 0.0522  |
| 6                  | 5.1425   | 2.1379  | -0.5988 | -0.2199 | -0.1558 | -0.0557  | -0.3841 | -0.1071 | -0.5459 | -0.3367 | -0.0502 | -0.1091 |
| 1                  | 4.9276   | 2.8198  | -1.4183 | 0.1180  | 0.1403  | 0.0395   | 0.1192  | 0.0987  | 0.1811  | 0.1988  | 0.0144  | 0.0764  |
| 6                  | 6.5513   | 1.9241  | -0.1740 | 0.3780  | -0.5008 | 0.1965   | 0.8490  | 0.2489  | 0.8320  | 0.7298  | 1.5573  | 0.4237  |

|    |         |         |         |         |         |         |         |         |         |         |         |         |
|----|---------|---------|---------|---------|---------|---------|---------|---------|---------|---------|---------|---------|
| 8  | 7.4966  | 2.4684  | -0.9738 | -0.3443 | 0.1065  | -0.1726 | -0.6465 | -0.3667 | -0.5935 | -0.6441 | -1.0835 | -0.3645 |
| 1  | 7.0883  | 2.8698  | -1.7551 | 0.3085  | 0.1872  | 0.1713  | 0.4325  | 0.3441  | 0.4064  | 0.4725  | 0.5702  | 0.2597  |
| 8  | 6.8759  | 1.3246  | 0.8190  | -0.3115 | 0.1178  | -0.2598 | -0.5542 | -0.3083 | -0.5091 | -0.5605 | -1.1600 | -0.3885 |
| 6  | 2.7794  | -3.1487 | -0.6633 | 0.0699  | -0.2451 | 0.1521  | 0.6017  | 0.1861  | 0.7159  | 0.5729  | 1.0567  | 0.2911  |
| 8  | 3.5241  | -4.0803 | -0.8516 | -0.2631 | 0.1462  | -0.2473 | -0.4684 | -0.2915 | -0.4984 | -0.5030 | -1.1391 | -0.3743 |
| 6  | 0.0962  | -5.3872 | -0.6392 | -0.4210 | -0.2475 | -0.0764 | -0.4240 | -0.2186 | -0.3542 | -0.6311 | 0.0201  | -0.2455 |
| 1  | -0.5409 | -5.6408 | -1.4933 | 0.1298  | 0.1328  | 0.0409  | 0.1254  | 0.0925  | 0.1055  | 0.2209  | 0.0235  | 0.0896  |
| 1  | 1.0855  | -5.8159 | -0.8099 | 0.1568  | 0.1398  | 0.0462  | 0.1443  | 0.0998  | 0.1234  | 0.2385  | 0.0472  | 0.0851  |
| 1  | -0.3375 | -5.8698 | 0.2437  | 0.1282  | 0.1329  | 0.0408  | 0.1253  | 0.0924  | 0.1078  | 0.2207  | 0.0201  | 0.0883  |
| 12 | -1.3505 | 0.0757  | -0.0590 | 0.6548  | 0.3051  | 0.4649  | 1.7724  | 1.0136  | 1.0832  | 1.7609  | 1.7175  | 0.7045  |
| 6  | -5.3125 | -3.9941 | 0.0752  | -0.1889 | -0.1553 | -0.0312 | -0.0452 | -0.0880 | -0.0514 | -0.2011 | -0.0182 | -0.0699 |
| 1  | -6.2381 | -4.1097 | -0.4865 | 0.1137  | 0.1479  | 0.0404  | 0.0960  | 0.0970  | 0.1188  | 0.2016  | 0.0277  | 0.0824  |
| 6  | -4.8541 | -5.0444 | 0.7570  | -0.2930 | -0.1925 | -0.0762 | -0.2762 | -0.1781 | -0.4095 | -0.3648 | -0.0695 | -0.1846 |
| 1  | -3.9662 | -4.9868 | 1.3784  | 0.1358  | 0.1238  | 0.0378  | 0.1131  | 0.0917  | 0.1842  | 0.1922  | 0.0335  | 0.0823  |
| 1  | -5.3746 | -5.9962 | 0.7342  | 0.1181  | 0.1221  | 0.0390  | 0.1124  | 0.0914  | 0.1595  | 0.1983  | 0.0362  | 0.0883  |
| 6  | 3.2481  | -1.6417 | -0.5899 | 0.0574  | -0.1025 | -0.0294 | -0.4975 | -0.0711 | -0.7112 | -0.4142 | 0.0148  | -0.0739 |
| 1  | 3.6360  | -1.3818 | -1.5802 | 0.0993  | 0.1817  | 0.0514  | 0.1496  | 0.1171  | 0.2186  | 0.2544  | 0.0694  | 0.0802  |
| 6  | 4.4502  | -1.5855 | 0.3294  | 0.2346  | -0.4884 | 0.1995  | 0.8068  | 0.2554  | 0.8474  | 0.7763  | 1.5843  | 0.4569  |
| 8  | 5.5838  | -1.6929 | -0.0599 | -0.2832 | 0.1388  | -0.2524 | -0.5403 | -0.3044 | -0.5295 | -0.5584 | -1.1755 | -0.3507 |
| 8  | 4.1073  | -1.4551 | 1.6201  | -0.2771 | 0.2464  | -0.1196 | -0.3481 | -0.2084 | -0.3594 | -0.4888 | -1.0792 | -0.2495 |
| 6  | 5.2183  | -1.4321 | 2.5308  | -0.2080 | -0.3019 | 0.0039  | -0.1190 | -0.1176 | -0.0676 | -0.2680 | 0.4389  | -0.1062 |
| 1  | 4.7817  | -1.2847 | 3.5176  | 0.1192  | 0.1099  | 0.0433  | 0.1007  | 0.1038  | 0.0889  | 0.1854  | 0.0403  | 0.0965  |
| 1  | 5.7585  | -2.3796 | 2.4856  | 0.1317  | 0.1146  | 0.0442  | 0.1061  | 0.1060  | 0.0956  | 0.1907  | 0.0539  | 0.0890  |
| 1  | 5.8981  | -0.6170 | 2.2741  | 0.1698  | 0.1189  | 0.0417  | 0.1210  | 0.1068  | 0.0952  | 0.2134  | 0.0468  | 0.0860  |

Dipole moment (in D) 10.42 (DEN) 8.25 5.80 8.41 11.14 10.22 10.48 12.97 19.89 10.21

-----



**Table S2.** Quadrupole moments for set on non-polar, neutral molecules:

|                                           | Population analysis schemes |         |         |         |                     |         |         |         |         |         |
|-------------------------------------------|-----------------------------|---------|---------|---------|---------------------|---------|---------|---------|---------|---------|
|                                           | Density                     | Mull    | Lowdin  | Hirsh.  | Hirsh.<br>Iterative | CM5     | ESP     | NPA     | AIM     | ACP     |
| Ethene (C2H4)                             |                             |         |         |         |                     |         |         |         |         |         |
| Q <sub>xx</sub>                           | -2.206                      | -2.084  | -2.188  | -0.708  | -2.023              | -1.68   | -2.963  | -3.492  | -0.585  | -1.615  |
| Q <sub>yy</sub>                           | 1.081                       | 0.667   | 0.7     | 0.227   | 0.648               | 0.538   | 0.949   | 1.118   | 0.187   | 0.517   |
| Q <sub>zz</sub>                           | 1.125                       | 1.417   | 1.487   | 0.481   | 1.375               | 1.142   | 2.014   | 2.374   | 0.398   | 1.098   |
| Cyclopropane (C3H6)                       |                             |         |         |         |                     |         |         |         |         |         |
| Q <sub>zz</sub>                           | 1.551                       | 0.417   | 0.5     | 0.145   | 0.433               | 0.366   | 0.538   | 0.834   | 0.091   | 0.351   |
| Ethyne (C2H2)                             |                             |         |         |         |                     |         |         |         |         |         |
| Q <sub>zz</sub>                           | 4.47                        | 4.386   | 2.884   | 2.131   | 4.704               | 3.371   | 6.463   | 5.291   | 3.872   | 3.234   |
| Carbon dioxide (CO2)                      |                             |         |         |         |                     |         |         |         |         |         |
| Q <sub>zz</sub>                           | -3.002                      | -2.411  | 2.672   | -2.145  | -6.252              | -2.68   | -4.658  | -6.382  | -14.723 | -3.897  |
| boron trihydride (BH3)                    |                             |         |         |         |                     |         |         |         |         |         |
| Q <sub>zz</sub>                           | 1.487                       | -0.105  | -0.325  | 0.574   | 1.57                | -0.456  | 2.055   | 1.078   | 6.395   | 0.649   |
| Boron trifluoride (BF3)                   |                             |         |         |         |                     |         |         |         |         |         |
| Q <sub>zz</sub>                           | 2.687                       | 2.742   | -4.427  | 1.719   | 5.424               | 1.038   | 4.02    | 5.979   | 10.271  | 3.174   |
| Boron trichloride (BCl3)                  |                             |         |         |         |                     |         |         |         |         |         |
| Q <sub>zz</sub>                           | 0.648                       | 2.027   | -13.074 | 1.268   | 4.035               | -0.356  | 1.634   | 1.957   | 14.725  | 3.229   |
| trans- SC12F4                             |                             |         |         |         |                     |         |         |         |         |         |
| Q <sub>zz</sub>                           | 3.199                       | 0.302   | 5.89    | 0.523   | 0.348               | 1.457   | 3.619   | 4.904   | 9.758   | 0.241   |
| trans- SF2Cl4                             |                             |         |         |         |                     |         |         |         |         |         |
| Q <sub>zz</sub>                           | -3.131                      | -0.761  | -5.475  | -0.383  | -0.276              | -1.219  | -3.576  | -6.079  | -9.257  | -0.322  |
| Benzene (C6H6)                            |                             |         |         |         |                     |         |         |         |         |         |
| Q <sub>zz</sub>                           | -5.149                      | -6.566  | -8.526  | -2.418  | -5.569              | -5.793  | -7.446  | -12.495 | -1.733  | -5.071  |
| Naphthalene (C10H8)                       |                             |         |         |         |                     |         |         |         |         |         |
| Q <sub>xx</sub>                           | -7.929                      | -9.032  | -16.039 | -4.11   | -8.732              | -10.008 | -10.676 | -22.262 | -3.158  | -8.286  |
| Q <sub>yy</sub>                           | 4.074                       | 5.791   | 8.432   | 2.145   | 4.594               | 5.234   | 5.324   | 12.16   | 2.014   | 4.425   |
| Q <sub>zz</sub>                           | 3.856                       | 3.241   | 7.606   | 1.964   | 4.137               | 4.774   | 5.352   | 10.102  | 1.144   | 3.861   |
| Anthracene (C14H10)                       |                             |         |         |         |                     |         |         |         |         |         |
| Q <sub>xx</sub>                           | -10.736                     | -10.736 | -23.614 | -5.843  | -12.04              | -14.273 | -14.517 | -32.011 | -4.729  | -11.55  |
| Q <sub>yy</sub>                           | 5.574                       | 7.732   | 12.651  | 3.152   | 6.626               | 7.64    | 7.032   | 18.239  | 3.36    | 6.397   |
| Q <sub>zz</sub>                           | 5.162                       | 3.004   | 10.964  | 2.692   | 5.414               | 6.633   | 7.485   | 13.772  | 1.369   | 5.153   |
| Pyrene (C16H10)                           |                             |         |         |         |                     |         |         |         |         |         |
| Q <sub>xx</sub>                           | -11.806                     | -11.908 | -28.239 | -6.697  | -12.82              | -16.51  | -16.206 | -37.576 | -5.374  | -13.023 |
| Q <sub>yy</sub>                           | 5.868                       | 2.404   | 14.036  | 3.534   | 6.524               | 8.294   | 8.075   | 18.06   | 2.438   | 6.523   |
| Q <sub>zz</sub>                           | 5.938                       | 9.504   | 14.203  | 3.163   | 6.296               | 8.216   | 8.131   | 19.516  | 2.936   | 6.5     |
| Coronene (C24H12)                         |                             |         |         |         |                     |         |         |         |         |         |
| Q <sub>zz</sub>                           | -16.784                     | -14.198 | -45.152 | -10.277 | -17.908             | -25.372 | -24.724 | -58.436 | -8.517  | -19.37  |
| Standard deviation for set of 14 molecule |                             |         |         |         |                     |         |         |         |         |         |
|                                           | ref                         | 2.421   | 13.131  | 3.898   | 2.369               | 3.74    | 3.614   | 18.392  | 8.561   | 2.01    |
